# Supplementary material for: Dynamics and function of distal regulatory elements during neurogenesis and neuroplasticity
Source: HighWire-hosted journal article supplement (doi:10.1101/gr.190926.115), 2015-07-13
Supplement: Supplemental_Methods.docx [file Supplemental_Methods.docx]

**SUPPLEMENTAL METHODS**

**Cortical Culture**

Cortical neurons were cultured as described previously ([Kim et al. 2010](#_ENREF_7)). Embryonic mouse cortex (E16.5) was dissected and tissue was dissociated with Trypsin for 10 minutes. After neutralizing Trypsin with 10% FBS in DMEM/F12 cell suspension was obtained by passing the samples through thin glass Pasteur pipette and then through cell strainer. All experiments were performed in cold conditions and cells were kept in cold until plating. Plates were pre-coated overnight with 20 µg/ml poly-D-Lysine (Sigma) and 4 µg/ml laminin (Sigma) in water. After overnight coating plates were washed three times with water and once with Neurobasal media. Neurons were plated at a density of 25,000/cm2 in Neurobasal media containing 2% B27 supplement (Invitrogen). Fresh media was added after two hours (and day 3 and 6) and neurons were kept in 7% CO2 at 37 degrees. Experiments were performed on day 7 neuron.

**FAIRE assay**

FAIRE-assay was performed as described previously ([Giresi et al. 2007](#_ENREF_5)). Briefly, neuronal progenitors, day-1 neurons and differentiated neurons (day 10) were crosslinked in medium containing 1% formaldehyde for 10 min at room temperature. Cells were collected by scraping in cold PBS, resuspended in buffer L1 (50 mM HEPES/KOH, pH 7.5, 140 mM NaCl, 1 mM EDTA, pH 8.0, 10% glycerol, 5% NP-40, 0.25% Triton X-100) and incubated for 10 min at 4 °C. The cells were then centrifuged for 5 min at 4 °C at 1,300 g. The pellet was resuspended in buffer L2 (200 mM NaCl, 1 mM EDTA pH 8.0, 0.5 mM EGTA pH 8.0, 10 mM Tris pH 8.0) and incubated for 10 min at room temperature, followed by centrifugation for 5 min at 4 °C at 1,300 g. The pellet was then resuspended in buffer L3 (1 mM EDTA pH 8.0, 0.5 mM EGTA pH 8.0, 10 mM Tris pH 8.0, 100 mM NaCl, 0.1% Na-deoxycholate, 0.17 mM N-lauroyl sarcosine) containing protease inhibitors and incubated at 4 °C for 3 h. Samples were then sonicated using Bioruptor plus (Diagenode), and cellular debris was cleared by spinning at 14,000 g for 10 min at 4 °C. DNA was isolated from 60 µg of total chromatin by adding an equal volume of phenol:chloroform:isoamyl alcohol (25:24:1), vortexing and spinning at 12,000 g for 5 min at room temperature. The aqueous phase was isolated, and a second round of phenol:chloroform:isoamyl alcohol purification was performed. Following collection of the aqueous phase, chloroform:isoamyl alcohol (24:1) was added, vortexed and spun at 12,000 g for 5 min at room temperature. The aqueous phase was then collected, and the DNA was ethanol precipitated and recovered in 40 µl of TE buffer. This recovered material was then re-extracted with phenol followed by chloroform:isoamyl alcohol (24:1) and subsequently ethanol precipitated. Next, the DNA was recovered in 40 µl TE buffer. To obtain the input DNA control, 10% input was treated with RNase A (0.2 mg/ml) for 30 min at 37 °C and then with Proteinase K (50 mg/ml) for 2.5 h at 55 °C. The crosslinking was reversed at 65 °C overnight with gentle shaking. The DNA was purified by phenol-chloroform extraction followed by ethanol precipitation and recovered in 40 µl of TE buffer. Real-time PCR using FAIRE or input DNA was performed using SYBR Green chemistry (ABI). Primers used for FAIRE-qPCRs are listed in Supplemental Table S8.

**RT-PCR**

RNA was extracted either using trizol or the SurePrep TrueTotal RNA Purification Kit (Fisher Scientific) and subsequently used for cDNA synthesis by applying the First Strand cDNA Synthesis Kit (Fermentas). Gene expression levels were measured using SYBR Green chemistry (ABI). Primers used for RT-qPCRs are listed in Supplemental Table S8.

**Cell survival assay**

Cells were pre-depleted with siRNA (pool of 4 siRNA targeting same gene, SMARTpool, Dharmacon) for two days and 40,000 cells per 6cm were platted and kept for 6 day. Fresh medium along with siRNA was added each alternate day. Cells were either counted or bright field images were taken or fixed with 4% PFA. For visualization of fixed colonies, cells were stained with solution containing crystal violet and 10% ethanol for 10 minutes and the plates were washed in water till the excessive dye washed away. Pictures of the plates were taken for down-stream analysis.

**RNA-seq data analysis**

RNA-Seq data was generated using Illumina sequencing. Reads were aligned to mouse genome (mm9) using TopHat ([Trapnell et al. 2009](#_ENREF_10)) (version 2.0.9) with default options. Expression was quantified after library size normalization using DESeq ([Anders and Huber 2010](#_ENREF_1)) and in Reads Per Kilobase of transcript per Million mapped reads (RPKM) using cufflink (version 2.1.1)([Trapnell et al. 2010](#_ENREF_11)). Differential expression analysis was performed using the DESeq package with a FDR rate of 0.1 ([Anders and Huber 2010](#_ENREF_1)).

**FAIRE-seq analysis**

The FAIRE libraries processed for Illumina sequencing were prepared according to Illumina’s instructions (Catalogue number IP-102-1001). Sequencing reads were aligned with the reference mouse genome (mm9) using bowtie (version 0.12.9) with a maximum of 2 mismatches in the seed region ([Langmead 2010](#_ENREF_8)). Aligned reads from all samples and replicates were merged before peak calling. Input FAIRE samples from all stages were pooled to create a single input file. Potential peaks were called using MACS ([Zhang et al. 2008](#_ENREF_12)) (version 2.0.10.2013071) without providing an input file and with default parameters. These potential peaks were then used to calculate their raw enrichment using the aligned bam files for each merged sample with respect to input using the QuasR package ([Gaidatzis et al. 2014](#_ENREF_4)). Normalized enrichment based on library size and input was calculated, and only peaks that displayed at least 1.5-fold enrichment above input were selected for further analysis. Normalized enrichment was calculated using the following formula:

where is the total number of reads aligning in the sample for the genomic feature; is the total number of aligned reads in the sample; is the total number of reads aligned in the input/background for the genomic feature; is the total number of aligned reads in the input/background; and p stands for pseudocount (correction for low alignment reads), which was set to 16. The FAIRE-seq data derived during this study are available under GEO accession number GSE65713.

**ChIP-seq analysis**

The ChIP libraries processed for Illumina sequencing were prepared using Illumina's standard instructions. ChIP-seq analysis of H3K27ac was performed in a manner similar to that described above for FAIRE-seq.

**Wig files**

Library size-normalized wig files were created for all the samples using the QuasR package ([Gaidatzis et al. 2014](#_ENREF_4)).

**lincRNA**

We collected lincRNA from NonCode (www.noncode.org)([Liu et al. 2005](#_ENREF_9)), ENSEMBL (<http://www.ensembl.org>) ([Flicek et al. 2014](#_ENREF_3)), UCSC (<http://genome.ucsc.edu>) and other published resources. Differential expression analysis was performed using the DESeq package with a FDR rate of 0.1.

**Genomic distribution of peaks**

The gene annotation file for mouse (mm9) from UCSC was used, and the genomic coordinates of the promoter, exon, intron and intergenic regions were generated in a hierarchical manner. Promoters were defined as 1000 bp upstream and downstream of the TSS; exon coordinates from the annotation file were used to define exons; and the remaining regions between the TSS and TTS were called introns. The rest of the genome was annotated as intergenic.

**Peak overlap calculation**

Overlapping peaks were called using BEDTools with at least 20% overlap. An alternative approach also used to identifay nearby peaks between FAIRE and H3K27ac peaks, where any peaks within 1 kb of the base peak were considered.

**Motif prediction**

Transcription factor motif prediction for stage-specific intergenic accessible regions was performed using Homer ([Heinz et al. 2010](#_ENREF_6)).

**Super-enhancer identification**

Super-enhancers were identified using the Homer package ([Heinz et al. 2010](#_ENREF_6)). Peaks that were within 6 kb were stitched together, and an enhancer score was calculated.

**GO enrichment analysis**

GO enrichment analysis were performed using the ToppGene package ([Chen et al. 2009](#_ENREF_2)). Only the top 20 enriched terms from the GO analysis were plotted. All p-values plotted are corrected for multiple testing.

**REFERENCES**

Anders S, Huber W. 2010. Differential expression analysis for sequence count data. *Genome biology* 11(10): R106.

Chen J, Bardes EE, Aronow BJ, Jegga AG. 2009. ToppGene Suite for gene list enrichment analysis and candidate gene prioritization. *Nucleic acids research* 37(Web Server issue): W305-311.

Flicek P, Amode MR, Barrell D, Beal K, Billis K, Brent S, Carvalho-Silva D, Clapham P, Coates G, Fitzgerald S et al. 2014. Ensembl 2014. *Nucleic acids research* 42(Database issue): D749-755.

Gaidatzis D, Lerch A, Hahne F, Stadler MB. 2014. QuasR: quantification and annotation of short reads in R. *Bioinformatics*.

Giresi PG, Kim J, McDaniell RM, Iyer VR, Lieb JD. 2007. FAIRE (Formaldehyde-Assisted Isolation of Regulatory Elements) isolates active regulatory elements from human chromatin. *Genome research* 17(6): 877-885.

Heinz S, Benner C, Spann N, Bertolino E, Lin YC, Laslo P, Cheng JX, Murre C, Singh H, Glass CK. 2010. Simple combinations of lineage-determining transcription factors prime cis-regulatory elements required for macrophage and B cell identities. *Molecular cell* 38(4): 576-589.

Kim TK, Hemberg M, Gray JM, Costa AM, Bear DM, Wu J, Harmin DA, Laptewicz M, Barbara-Haley K, Kuersten S et al. 2010. Widespread transcription at neuronal activity-regulated enhancers. *Nature* 465(7295): 182-187.

Langmead B. 2010. Aligning short sequencing reads with Bowtie. *Current protocols in bioinformatics / editoral board, Andreas D Baxevanis [et al]* Chapter 11: Unit 11 17.

Liu C, Bai B, Skogerbo G, Cai L, Deng W, Zhang Y, Bu D, Zhao Y, Chen R. 2005. NONCODE: an integrated knowledge database of non-coding RNAs. *Nucleic acids research* 33(Database issue): D112-115.

Trapnell C, Pachter L, Salzberg SL. 2009. TopHat: discovering splice junctions with RNA-Seq. *Bioinformatics* 25(9): 1105-1111.

Trapnell C, Williams BA, Pertea G, Mortazavi A, Kwan G, van Baren MJ, Salzberg SL, Wold BJ, Pachter L. 2010. Transcript assembly and quantification by RNA-Seq reveals unannotated transcripts and isoform switching during cell differentiation. *Nature biotechnology* 28(5): 511-515.

Zhang Y, Liu T, Meyer CA, Eeckhoute J, Johnson DS, Bernstein BE, Nusbaum C, Myers RM, Brown M, Li W et al. 2008. Model-based analysis of ChIP-Seq (MACS). *Genome biology* 9(9): R137.
