# Supplementary material for: Dynamics and function of distal regulatory elements during neurogenesis and neuroplasticity
Source: HighWire-hosted journal article supplement (doi:10.1101/gr.190926.115), 2015-07-13
Supplement: Supplemental_Table_S1.xlsx [file Supplemental_Table_S1.xlsx]

## Sheet: FAIRE_PotentialPeaksMACS
chr1	3660743	3661030	PotentialPeaks_FAIRE_peak_1	142	.	4.23915	17.11	14.2922	139
chr1	3661728	3662133	PotentialPeaks_FAIRE_peak_2	274	.	5.71688	30.5211	27.4261	149
chr1	3832235	3832413	PotentialPeaks_FAIRE_peak_3	79	.	3.36192	10.5685	7.93804	116
chr1	4132701	4132911	PotentialPeaks_FAIRE_peak_4	68	.	3.18497	9.43818	6.85064	64
chr1	4316693	4316847	PotentialPeaks_FAIRE_peak_5	68	.	3.18497	9.43818	6.85064	108
chr1	4322631	4322788	PotentialPeaks_FAIRE_peak_6	58	.	3.00803	8.35443	5.81364	64
chr1	4407587	4407810	PotentialPeaks_FAIRE_peak_7	43	.	2.74262	6.82164	4.36435	28
chr1	4561422	4562349	PotentialPeaks_FAIRE_peak_8	312	.	6.28148	34.4167	31.2549	656
chr1	4568897	4569049	PotentialPeaks_FAIRE_peak_9	34	.	2.56567	5.86589	3.47934	77
chr1	4634023	4634184	PotentialPeaks_FAIRE_peak_10	30	.	2.4772	5.40904	3.06515	105
chr1	4758527	4758726	PotentialPeaks_FAIRE_peak_11	84	.	3.45039	11.1503	8.49965	133
chr1	4760066	4760233	PotentialPeaks_FAIRE_peak_12	53	.	2.91956	7.83078	5.31581	63
chr1	4775689	4776077	PotentialPeaks_FAIRE_peak_13	634	.	9.37798	67.1154	63.4959	147
chr1	4797706	4798041	PotentialPeaks_FAIRE_peak_14	329	.	6.45842	36.1133	32.9239	157
chr1	4832440	4832603	PotentialPeaks_FAIRE_peak_15	30	.	2.4772	5.40904	3.06515	62
chr1	4847445	4847930	PotentialPeaks_FAIRE_peak_16	989	.	10.9164	103.116	98.9561	321
chr1	5008071	5008241	PotentialPeaks_FAIRE_peak_17	106	.	3.42527	13.3519	10.635	64
chr1	5009397	5009633	PotentialPeaks_FAIRE_peak_18	258	.	5.02787	28.8751	25.8091	109
chr1	5012891	5013275	PotentialPeaks_FAIRE_peak_19	181	.	4.31008	21.0544	18.1424	143
chr1	5060392	5060573	PotentialPeaks_FAIRE_peak_20	90	.	3.53886	11.743	9.0727	76
chr1	5072991	5073304	PotentialPeaks_FAIRE_peak_21	605	.	9.11257	64.0895	60.5102	181
chr1	5173647	5173826	PotentialPeaks_FAIRE_peak_22	39	.	2.65415	6.3369	3.91272	122
chr1	5211189	5211341	PotentialPeaks_FAIRE_peak_23	43	.	2.74262	6.82164	4.36435	69
chr1	5223020	5223336	PotentialPeaks_FAIRE_peak_24	195	.	4.9544	22.5141	19.5711	169
chr1	5905498	5905707	PotentialPeaks_FAIRE_peak_25	133	.	4.15816	16.1735	13.3776	72
chr1	6066799	6066951	PotentialPeaks_FAIRE_peak_26	54	.	2.82373	7.98937	5.46884	62
chr1	6204548	6204859	PotentialPeaks_FAIRE_peak_27	499	.	8.03513	53.3489	49.911	155
chr1	6205331	6205500	PotentialPeaks_FAIRE_peak_28	49	.	2.81042	7.41563	4.92451	31
chr1	6262379	6262642	PotentialPeaks_FAIRE_peak_29	217	.	5.21982	24.77	21.7817	84
chr1	6372874	6373209	PotentialPeaks_FAIRE_peak_30	210	.	5.13135	24.0106	21.0374	146
chr1	6393677	6393838	PotentialPeaks_FAIRE_peak_31	34	.	2.56567	5.86589	3.47934	72
chr1	6396503	6396724	PotentialPeaks_FAIRE_peak_32	273	.	5.79639	30.4921	27.3974	102
chr1	6400280	6400448	PotentialPeaks_FAIRE_peak_33	79	.	3.36192	10.5685	7.93804	50
chr1	6516460	6516626	PotentialPeaks_FAIRE_peak_34	53	.	2.91956	7.83078	5.31581	42
chr1	6719342	6719673	PotentialPeaks_FAIRE_peak_35	140	.	4.24663	16.8441	14.0316	92
chr1	6724027	6724282	PotentialPeaks_FAIRE_peak_36	117	.	3.82801	14.4756	11.7258	148
chr1	6724895	6725194	PotentialPeaks_FAIRE_peak_37	232	.	5.39676	26.3104	23.2925	122
chr1	6750579	6750972	PotentialPeaks_FAIRE_peak_38	58	.	3.00803	8.35443	5.81364	275
chr1	6757920	6758161	PotentialPeaks_FAIRE_peak_39	84	.	3.45039	11.1503	8.49965	130
chr1	7078453	7079393	PotentialPeaks_FAIRE_peak_40	774	.	9.11248	81.2894	77.4671	514
chr1	7303593	7303844	PotentialPeaks_FAIRE_peak_41	127	.	4.06969	15.5119	12.733	128
chr1	7387035	7387213	PotentialPeaks_FAIRE_peak_42	94	.	3.46826	12.1584	9.47812	105
chr1	7387696	7388577	PotentialPeaks_FAIRE_peak_43	1044	.	12.4063	108.715	104.467	378
chr1	7533676	7533841	PotentialPeaks_FAIRE_peak_44	68	.	3.18497	9.43818	6.85064	78
chr1	8903737	8904111	PotentialPeaks_FAIRE_peak_45	133	.	4.15816	16.1735	13.3776	252
chr1	9189411	9189570	PotentialPeaks_FAIRE_peak_46	48	.	2.83109	7.31973	4.83219	69
chr1	9288539	9288863	PotentialPeaks_FAIRE_peak_47	167	.	4.60052	19.6135	16.7331	141
chr1	9289838	9290007	PotentialPeaks_FAIRE_peak_48	39	.	2.65415	6.3369	3.91272	29
chr1	9372191	9372343	PotentialPeaks_FAIRE_peak_49	43	.	2.74262	6.82164	4.36435	56
chr1	9531369	9531647	PotentialPeaks_FAIRE_peak_50	294	.	5.71906	32.5331	29.4042	166
chr1	9535226	9535701	PotentialPeaks_FAIRE_peak_51	1134	.	10.8041	117.802	113.408	175
chr1	9539140	9539321	PotentialPeaks_FAIRE_peak_52	77	.	2.94538	10.3445	7.72562	98
chr1	9554597	9554833	PotentialPeaks_FAIRE_peak_53	96	.	3.62733	12.3462	9.65687	117
chr1	9563413	9563678	PotentialPeaks_FAIRE_peak_54	114	.	3.89275	14.2165	11.4723	141
chr1	9568812	9569191	PotentialPeaks_FAIRE_peak_55	167	.	4.60052	19.6135	16.7331	219
chr1	9574020	9574280	PotentialPeaks_FAIRE_peak_56	68	.	3.18497	9.43818	6.85064	118
chr1	9574875	9575085	PotentialPeaks_FAIRE_peak_57	43	.	2.74262	6.82164	4.36435	103
chr1	9591758	9592028	PotentialPeaks_FAIRE_peak_58	63	.	3.0965	8.89034	6.32549	120
chr1	9611607	9611828	PotentialPeaks_FAIRE_peak_59	83	.	3.24771	10.9678	8.32698	90
chr1	9638739	9639189	PotentialPeaks_FAIRE_peak_60	70	.	2.99711	9.64925	7.05562	222
chr1	9639331	9639717	PotentialPeaks_FAIRE_peak_61	125	.	3.73645	15.3585	12.5864	119
chr1	9648583	9648738	PotentialPeaks_FAIRE_peak_62	51	.	2.85871	7.60017	5.10223	48
chr1	9649075	9649409	PotentialPeaks_FAIRE_peak_63	113	.	3.86267	14.0911	11.3537	117
chr1	9690156	9691020	PotentialPeaks_FAIRE_peak_64	299	.	6.08808	33.0911	29.9521	286
chr1	9738297	9738827	PotentialPeaks_FAIRE_peak_65	1110	.	11.1266	115.425	111.069	336
chr1	9762918	9763154	PotentialPeaks_FAIRE_peak_66	210	.	5.13135	24.0106	21.0374	112
chr1	9838666	9838912	PotentialPeaks_FAIRE_peak_67	53	.	2.91956	7.83078	5.31581	111
chr1	9933005	9933208	PotentialPeaks_FAIRE_peak_68	53	.	2.91956	7.83078	5.31581	90
chr1	9934065	9934415	PotentialPeaks_FAIRE_peak_69	764	.	10.212	80.298	76.4904	223
chr1	9979944	9980153	PotentialPeaks_FAIRE_peak_70	53	.	2.91956	7.83078	5.31581	111
chr1	9999064	9999373	PotentialPeaks_FAIRE_peak_71	203	.	5.04288	23.2586	20.3004	173
chr1	10027917	10028401	PotentialPeaks_FAIRE_peak_72	257	.	4.88821	28.7851	25.7205	360
chr1	10029630	10029954	PotentialPeaks_FAIRE_peak_73	208	.	4.32165	23.8504	20.8823	139
chr1	10030127	10030377	PotentialPeaks_FAIRE_peak_74	243	.	4.64785	27.3703	24.3322	117
chr1	10079717	10079902	PotentialPeaks_FAIRE_peak_75	167	.	4.60052	19.6135	16.7331	64
chr1	10105008	10105160	PotentialPeaks_FAIRE_peak_76	39	.	2.65415	6.3369	3.91272	120
chr1	10106130	10106459	PotentialPeaks_FAIRE_peak_77	114	.	3.89275	14.2165	11.4723	199
chr1	10221645	10221923	PotentialPeaks_FAIRE_peak_78	93	.	3.28565	12.0053	9.32877	79
chr1	10222006	10222238	PotentialPeaks_FAIRE_peak_79	45	.	2.60258	7.06251	4.59527	117
chr1	10222999	10223311	PotentialPeaks_FAIRE_peak_80	186	.	4.40506	21.5465	18.6259	181
chr1	10467021	10467254	PotentialPeaks_FAIRE_peak_81	79	.	3.36192	10.5685	7.93804	99
chr1	10696818	10696973	PotentialPeaks_FAIRE_peak_82	39	.	2.65415	6.3369	3.91272	34
chr1	10749758	10749949	PotentialPeaks_FAIRE_peak_83	114	.	3.89275	14.2165	11.4723	122
chr1	10844659	10844860	PotentialPeaks_FAIRE_peak_84	160	.	4.51205	18.9085	16.0441	89
chr1	10983335	10983845	PotentialPeaks_FAIRE_peak_85	79	.	3.36192	10.5685	7.93804	284
chr1	10983979	10984131	PotentialPeaks_FAIRE_peak_86	23	.	2.30026	4.53965	2.30247	29
chr1	11001817	11001992	PotentialPeaks_FAIRE_peak_87	30	.	2.4772	5.40904	3.06515	85
chr1	11141752	11141924	PotentialPeaks_FAIRE_peak_88	63	.	3.0965	8.89034	6.32549	101
chr1	11267903	11268118	PotentialPeaks_FAIRE_peak_89	39	.	2.65415	6.3369	3.91272	84
chr1	11319699	11319905	PotentialPeaks_FAIRE_peak_90	90	.	3.53886	11.743	9.0727	112
chr1	11403732	11403913	PotentialPeaks_FAIRE_peak_91	55	.	2.88333	8.05391	5.53118	107
chr1	11404044	11404553	PotentialPeaks_FAIRE_peak_92	259	.	5.4919	29.051	25.9824	268
chr1	11647909	11648103	PotentialPeaks_FAIRE_peak_93	68	.	3.18497	9.43818	6.85064	91
chr1	12046011	12046279	PotentialPeaks_FAIRE_peak_94	96	.	3.62733	12.3462	9.65687	145
chr1	12548625	12548814	PotentialPeaks_FAIRE_peak_95	34	.	2.56567	5.86589	3.47934	95
chr1	12567091	12567383	PotentialPeaks_FAIRE_peak_96	165	.	4.34524	19.4023	16.5288	141
chr1	12567472	12567642	PotentialPeaks_FAIRE_peak_97	30	.	2.39613	5.38558	3.06433	106
chr1	12570482	12570641	PotentialPeaks_FAIRE_peak_98	26	.	2.30223	4.91018	2.64614	48
chr1	12660991	12661179	PotentialPeaks_FAIRE_peak_99	53	.	2.91956	7.83078	5.31581	95
chr1	12662045	12662242	PotentialPeaks_FAIRE_peak_100	84	.	3.45039	11.1503	8.49965	91
chr1	12679703	12679953	PotentialPeaks_FAIRE_peak_101	75	.	3.25315	10.1325	7.51936	151
chr1	12682031	12682205	PotentialPeaks_FAIRE_peak_102	43	.	2.68685	6.77664	4.33273	100
chr1	12682381	12682686	PotentialPeaks_FAIRE_peak_103	47	.	2.76727	7.24961	4.77472	84
chr1	12683011	12683265	PotentialPeaks_FAIRE_peak_104	35	.	2.50655	5.93925	3.54895	29
chr1	12705497	12705698	PotentialPeaks_FAIRE_peak_105	26	.	2.32476	4.99315	2.69691	117
chr1	12708247	12708730	PotentialPeaks_FAIRE_peak_106	48	.	2.74235	7.31948	4.83219	226
chr1	12801189	12801693	PotentialPeaks_FAIRE_peak_107	124	.	3.71155	15.2375	12.468	164
chr1	12824221	12824373	PotentialPeaks_FAIRE_peak_108	22	.	2.23835	4.44479	2.2483	107
chr1	12825516	12826013	PotentialPeaks_FAIRE_peak_109	73	.	3.06899	9.97045	7.36742	400
chr1	12826207	12826363	PotentialPeaks_FAIRE_peak_110	49	.	2.68553	7.41368	4.92276	79
chr1	12854244	12854450	PotentialPeaks_FAIRE_peak_111	114	.	3.83239	14.2295	11.4849	83
chr1	12980712	12980903	PotentialPeaks_FAIRE_peak_112	64	.	2.71678	9.01487	6.44629	94
chr1	12981132	12981373	PotentialPeaks_FAIRE_peak_113	244	.	4.61812	27.518	24.4774	111
chr1	12981677	12981843	PotentialPeaks_FAIRE_peak_114	35	.	2.28365	5.91177	3.52289	132
chr1	12982441	12982944	PotentialPeaks_FAIRE_peak_115	136	.	3.52496	16.4646	13.6629	402
chr1	12995106	12995337	PotentialPeaks_FAIRE_peak_116	79	.	3.36192	10.5685	7.93804	114
chr1	12995904	12996098	PotentialPeaks_FAIRE_peak_117	39	.	2.65415	6.3369	3.91272	75
chr1	13040306	13040505	PotentialPeaks_FAIRE_peak_118	91	.	3.43839	11.7966	9.12508	71
chr1	13042203	13042370	PotentialPeaks_FAIRE_peak_119	108	.	3.72785	13.522	10.8012	87
chr1	13043363	13043583	PotentialPeaks_FAIRE_peak_120	48	.	2.83109	7.31973	4.83219	89
chr1	13110194	13110353	PotentialPeaks_FAIRE_peak_121	30	.	2.4772	5.40904	3.06515	38
chr1	13124510	13124682	PotentialPeaks_FAIRE_peak_122	73	.	3.27345	9.99766	7.38818	115
chr1	13125257	13125441	PotentialPeaks_FAIRE_peak_123	30	.	2.4772	5.40904	3.06515	115
chr1	13132934	13133132	PotentialPeaks_FAIRE_peak_124	39	.	2.65415	6.3369	3.91272	109
chr1	13141302	13141454	PotentialPeaks_FAIRE_peak_125	43	.	2.66497	6.85178	4.39322	101
chr1	13196976	13197128	PotentialPeaks_FAIRE_peak_126	48	.	2.83109	7.31973	4.83219	84
chr1	13280257	13280465	PotentialPeaks_FAIRE_peak_127	43	.	2.74262	6.82164	4.36435	110
chr1	13281449	13281643	PotentialPeaks_FAIRE_peak_128	85	.	3.40657	11.2027	8.55069	81
chr1	13356824	13356984	PotentialPeaks_FAIRE_peak_129	26	.	2.38873	4.96681	2.67217	39
chr1	13362376	13362960	PotentialPeaks_FAIRE_peak_130	985	.	9.21799	102.739	98.5849	273
chr1	13364071	13364256	PotentialPeaks_FAIRE_peak_131	150	.	3.68207	17.8694	15.0339	69
chr1	13416557	13416764	PotentialPeaks_FAIRE_peak_132	68	.	3.18497	9.43818	6.85064	93
chr1	13521648	13521906	PotentialPeaks_FAIRE_peak_133	146	.	4.3351	17.5236	14.6947	150
chr1	13573549	13573701	PotentialPeaks_FAIRE_peak_134	31	.	2.43772	5.54117	3.19001	84
chr1	13579189	13579367	PotentialPeaks_FAIRE_peak_135	81	.	3.11227	10.7671	8.13152	102
chr1	13579773	13580249	PotentialPeaks_FAIRE_peak_136	443	.	6.93761	47.6842	44.3241	349
chr1	13604895	13605132	PotentialPeaks_FAIRE_peak_137	43	.	2.74262	6.82164	4.36435	136
chr1	13618959	13619118	PotentialPeaks_FAIRE_peak_138	53	.	2.91956	7.83078	5.31581	127
chr1	13649935	13650094	PotentialPeaks_FAIRE_peak_139	53	.	2.87318	7.83432	5.3192	42
chr1	13650516	13650850	PotentialPeaks_FAIRE_peak_140	578	.	8.47177	61.4363	57.8921	139
chr1	13696501	13696721	PotentialPeaks_FAIRE_peak_141	133	.	4.15816	16.1735	13.3776	113
chr1	13774581	13774813	PotentialPeaks_FAIRE_peak_142	377	.	5.28217	41.0553	37.7908	116
chr1	13779335	13779922	PotentialPeaks_FAIRE_peak_143	785	.	8.35504	82.4381	78.5984	150
chr1	13785589	13785761	PotentialPeaks_FAIRE_peak_144	39	.	2.65415	6.3369	3.91272	24
chr1	13789814	13789987	PotentialPeaks_FAIRE_peak_145	90	.	3.53886	11.743	9.0727	101
chr1	13825172	13825461	PotentialPeaks_FAIRE_peak_146	48	.	2.83109	7.31973	4.83219	174
chr1	13851141	13851428	PotentialPeaks_FAIRE_peak_147	133	.	4.15816	16.1735	13.3776	181
chr1	13926216	13926434	PotentialPeaks_FAIRE_peak_148	58	.	3.00803	8.35443	5.81364	137
chr1	14087966	14088132	PotentialPeaks_FAIRE_peak_149	53	.	2.91956	7.83078	5.31581	90
chr1	14125350	14125578	PotentialPeaks_FAIRE_peak_150	58	.	3.00803	8.35443	5.81364	92
chr1	14170432	14170661	PotentialPeaks_FAIRE_peak_151	63	.	2.95584	8.90255	6.33729	114
chr1	14171673	14172051	PotentialPeaks_FAIRE_peak_152	191	.	4.45763	22.1302	19.1967	172
chr1	14182775	14183111	PotentialPeaks_FAIRE_peak_153	96	.	3.62733	12.3462	9.65687	198
chr1	14188343	14188530	PotentialPeaks_FAIRE_peak_154	73	.	3.27345	9.99766	7.38818	109
chr1	14247282	14247438	PotentialPeaks_FAIRE_peak_155	39	.	2.65415	6.3369	3.91272	44
chr1	14293571	14293859	PotentialPeaks_FAIRE_peak_156	82	.	3.38295	10.8785	8.24	106
chr1	14299635	14300264	PotentialPeaks_FAIRE_peak_157	242	.	5.06114	27.2716	24.2361	299
chr1	14350238	14350420	PotentialPeaks_FAIRE_peak_158	39	.	2.65415	6.3369	3.91272	55
chr1	14496613	14496819	PotentialPeaks_FAIRE_peak_159	56	.	2.92376	8.21464	5.6863	63
chr1	14585121	14585273	PotentialPeaks_FAIRE_peak_160	26	.	2.38873	4.96681	2.67217	78
chr1	14626059	14626258	PotentialPeaks_FAIRE_peak_161	90	.	3.53886	11.743	9.0727	92
chr1	14719245	14719401	PotentialPeaks_FAIRE_peak_162	73	.	3.27345	9.99766	7.38818	68
chr1	14730247	14730482	PotentialPeaks_FAIRE_peak_163	167	.	4.60052	19.6135	16.7331	129
chr1	14745417	14745657	PotentialPeaks_FAIRE_peak_164	89	.	3.45581	11.6381	8.97516	124
chr1	15276636	15277060	PotentialPeaks_FAIRE_peak_165	79	.	3.36192	10.5685	7.93804	81
chr1	15277307	15277460	PotentialPeaks_FAIRE_peak_166	39	.	2.65415	6.3369	3.91272	131
chr1	15425055	15425214	PotentialPeaks_FAIRE_peak_167	26	.	2.38873	4.96681	2.67217	67
chr1	15612060	15612289	PotentialPeaks_FAIRE_peak_168	329	.	6.45842	36.1133	32.9239	129
chr1	15634911	15635106	PotentialPeaks_FAIRE_peak_169	26	.	2.38873	4.96681	2.67217	47
chr1	15673778	15673976	PotentialPeaks_FAIRE_peak_170	133	.	4.15816	16.1735	13.3776	104
chr1	15795238	15795873	PotentialPeaks_FAIRE_peak_171	1516	.	15.5504	156.561	151.692	430
chr1	15796198	15796412	PotentialPeaks_FAIRE_peak_172	48	.	2.74911	7.34636	4.85782	107
chr1	15869782	15869934	PotentialPeaks_FAIRE_peak_173	31	.	2.46336	5.49861	3.14965	69
chr1	15892616	15892815	PotentialPeaks_FAIRE_peak_174	58	.	3.00803	8.35443	5.81364	103
chr1	16083300	16083564	PotentialPeaks_FAIRE_peak_175	84	.	3.45039	11.1503	8.49965	113
chr1	16094232	16094658	PotentialPeaks_FAIRE_peak_176	407	.	5.95495	44.0796	40.77	309
chr1	16094743	16095267	PotentialPeaks_FAIRE_peak_177	200	.	4.23597	23.0444	20.0925	355
chr1	16095816	16095995	PotentialPeaks_FAIRE_peak_178	66	.	2.72938	9.24333	6.66766	85
chr1	16117764	16118123	PotentialPeaks_FAIRE_peak_179	46	.	2.64403	7.08229	4.61433	100
chr1	16163240	16163503	PotentialPeaks_FAIRE_peak_180	48	.	2.83109	7.31973	4.83219	119
chr1	16192249	16192408	PotentialPeaks_FAIRE_peak_181	34	.	2.56567	5.86589	3.47934	128
chr1	16202793	16202951	PotentialPeaks_FAIRE_peak_182	29	.	2.432	5.25018	2.93773	81
chr1	16219749	16219989	PotentialPeaks_FAIRE_peak_183	93	.	3.56115	12.0752	9.39696	94
chr1	16239010	16239546	PotentialPeaks_FAIRE_peak_184	63	.	3.0965	8.89034	6.32549	217
chr1	16283348	16283500	PotentialPeaks_FAIRE_peak_185	39	.	2.65415	6.3369	3.91272	54
chr1	16284100	16284293	PotentialPeaks_FAIRE_peak_186	114	.	3.89275	14.2165	11.4723	102
chr1	16430384	16430558	PotentialPeaks_FAIRE_peak_187	114	.	3.89275	14.2165	11.4723	82
chr1	16509796	16510122	PotentialPeaks_FAIRE_peak_188	232	.	5.39676	26.3104	23.2925	112
chr1	16535180	16535385	PotentialPeaks_FAIRE_peak_189	53	.	2.91956	7.83078	5.31581	69
chr1	16608582	16608777	PotentialPeaks_FAIRE_peak_190	33	.	2.48078	5.70137	3.34104	47
chr1	16609242	16609632	PotentialPeaks_FAIRE_peak_191	891	.	11.3598	93.1764	89.174	199
chr1	16646552	16646764	PotentialPeaks_FAIRE_peak_192	100	.	3.14472	12.7596	10.0607	127
chr1	16646883	16647425	PotentialPeaks_FAIRE_peak_193	1112	.	10.3958	115.584	111.226	349
chr1	16647479	16647631	PotentialPeaks_FAIRE_peak_194	65	.	2.71464	9.16681	6.59355	114
chr1	16655095	16655499	PotentialPeaks_FAIRE_peak_195	346	.	6.44871	37.8423	34.6253	177
chr1	16678668	16678861	PotentialPeaks_FAIRE_peak_196	73	.	3.27345	9.99766	7.38818	64
chr1	16788478	16788710	PotentialPeaks_FAIRE_peak_197	181	.	4.77746	21.048	18.1362	107
chr1	17087839	17088046	PotentialPeaks_FAIRE_peak_198	90	.	3.53886	11.743	9.0727	101
chr1	17113580	17113851	PotentialPeaks_FAIRE_peak_199	263	.	5.75065	29.4746	26.3973	129
chr1	17135328	17135939	PotentialPeaks_FAIRE_peak_200	312	.	6.28148	34.4167	31.2549	116
chr1	17619741	17619923	PotentialPeaks_FAIRE_peak_201	90	.	3.53886	11.743	9.0727	56
chr1	17699490	17699652	PotentialPeaks_FAIRE_peak_202	48	.	2.83109	7.31973	4.83219	46
chr1	17828568	17828783	PotentialPeaks_FAIRE_peak_203	181	.	4.77746	21.048	18.1362	100
chr1	18095595	18095747	PotentialPeaks_FAIRE_peak_204	48	.	2.83109	7.31973	4.83219	94
chr1	18096349	18096516	PotentialPeaks_FAIRE_peak_205	108	.	3.80427	13.5831	10.857	92
chr1	18158505	18158657	PotentialPeaks_FAIRE_peak_206	53	.	2.91956	7.83078	5.31581	47
chr1	18350150	18350330	PotentialPeaks_FAIRE_peak_207	73	.	3.27345	9.99766	7.38818	103
chr1	18406019	18406327	PotentialPeaks_FAIRE_peak_208	102	.	3.7158	12.9596	10.2517	215
chr1	18406449	18406861	PotentialPeaks_FAIRE_peak_209	527	.	8.40479	56.2076	52.7314	210
chr1	18453390	18453592	PotentialPeaks_FAIRE_peak_210	30	.	2.4772	5.40904	3.06515	89
chr1	18589056	18589287	PotentialPeaks_FAIRE_peak_211	68	.	3.18497	9.43818	6.85064	127
chr1	18881023	18881175	PotentialPeaks_FAIRE_peak_212	34	.	2.56567	5.86589	3.47934	128
chr1	19046441	19046656	PotentialPeaks_FAIRE_peak_213	63	.	3.0965	8.89034	6.32549	121
chr1	19169214	19169407	PotentialPeaks_FAIRE_peak_214	79	.	3.36192	10.5685	7.93804	79
chr1	19195747	19195954	PotentialPeaks_FAIRE_peak_215	204	.	5.00456	23.4419	20.4807	91
chr1	19196389	19196583	PotentialPeaks_FAIRE_peak_216	152	.	4.26237	18.1092	15.2692	98
chr1	19199146	19199341	PotentialPeaks_FAIRE_peak_217	68	.	2.87696	9.46262	6.87424	97
chr1	19201915	19202222	PotentialPeaks_FAIRE_peak_218	182	.	4.27474	21.17	18.2559	120
chr1	19211739	19212074	PotentialPeaks_FAIRE_peak_219	34	.	2.56567	5.86589	3.47934	208
chr1	19218546	19218698	PotentialPeaks_FAIRE_peak_220	43	.	2.74262	6.82164	4.36435	37
chr1	19220939	19221130	PotentialPeaks_FAIRE_peak_221	22	.	2.28249	4.47968	2.28012	42
chr1	19231559	19231731	PotentialPeaks_FAIRE_peak_222	115	.	3.61823	14.2859	11.5402	100
chr1	19232051	19232288	PotentialPeaks_FAIRE_peak_223	29	.	2.32577	5.24413	2.93211	93
chr1	19235151	19235503	PotentialPeaks_FAIRE_peak_224	303	.	5.83928	33.5448	30.3992	201
chr1	19281673	19281882	PotentialPeaks_FAIRE_peak_225	79	.	3.36192	10.5685	7.93804	109
chr1	19664194	19664385	PotentialPeaks_FAIRE_peak_226	96	.	3.62733	12.3462	9.65687	110
chr1	19664639	19664838	PotentialPeaks_FAIRE_peak_227	48	.	2.83109	7.31973	4.83219	69
chr1	19671314	19671466	PotentialPeaks_FAIRE_peak_228	39	.	2.65415	6.3369	3.91272	63
chr1	19671540	19671734	PotentialPeaks_FAIRE_peak_229	63	.	3.0965	8.89034	6.32549	110
chr1	19721143	19721394	PotentialPeaks_FAIRE_peak_230	43	.	2.74262	6.82164	4.36435	134
chr1	19840132	19840284	PotentialPeaks_FAIRE_peak_231	34	.	2.56567	5.86589	3.47934	26
chr1	19917847	19918347	PotentialPeaks_FAIRE_peak_232	361	.	6.40708	39.404	36.1644	341
chr1	19941369	19941741	PotentialPeaks_FAIRE_peak_233	351	.	6.54914	38.3284	35.1049	125
chr1	19941897	19942156	PotentialPeaks_FAIRE_peak_234	90	.	3.41704	11.7051	9.04043	130
chr1	19964092	19964381	PotentialPeaks_FAIRE_peak_235	60	.	3.01602	8.57775	6.0297	133
chr1	19971351	19971619	PotentialPeaks_FAIRE_peak_236	127	.	4.06969	15.5119	12.733	88
chr1	19974101	19974310	PotentialPeaks_FAIRE_peak_237	140	.	4.24663	16.8441	14.0316	98
chr1	20048392	20048668	PotentialPeaks_FAIRE_peak_238	30	.	2.4772	5.40904	3.06515	169
chr1	20069695	20069871	PotentialPeaks_FAIRE_peak_239	68	.	3.18497	9.43818	6.85064	95
chr1	20125137	20125611	PotentialPeaks_FAIRE_peak_240	130	.	4.08771	15.8735	13.0873	169
chr1	20170315	20170596	PotentialPeaks_FAIRE_peak_241	279	.	5.92759	31.0966	27.9909	149
chr1	20292232	20293405	PotentialPeaks_FAIRE_peak_242	315	.	5.34717	34.7486	31.582	862
chr1	20301538	20301851	PotentialPeaks_FAIRE_peak_243	120	.	3.98122	14.8595	12.0979	227
chr1	20418520	20418970	PotentialPeaks_FAIRE_peak_244	53	.	2.91956	7.83078	5.31581	80
chr1	20440261	20440509	PotentialPeaks_FAIRE_peak_245	354	.	6.72383	38.7023	35.4721	142
chr1	20467529	20467697	PotentialPeaks_FAIRE_peak_246	58	.	3.00803	8.35443	5.81364	67
chr1	20467825	20468031	PotentialPeaks_FAIRE_peak_247	43	.	2.74262	6.82164	4.36435	83
chr1	20544581	20544780	PotentialPeaks_FAIRE_peak_248	296	.	6.10453	32.7442	29.6103	102
chr1	20602858	20603097	PotentialPeaks_FAIRE_peak_249	114	.	3.89275	14.2165	11.4723	111
chr1	20668112	20668454	PotentialPeaks_FAIRE_peak_250	296	.	6.10453	32.7442	29.6103	212
chr1	20705384	20705618	PotentialPeaks_FAIRE_peak_251	68	.	3.18497	9.43818	6.85064	97
chr1	20712201	20712353	PotentialPeaks_FAIRE_peak_252	43	.	2.74262	6.82164	4.36435	46
chr1	20751446	20751603	PotentialPeaks_FAIRE_peak_253	73	.	3.27345	9.99766	7.38818	74
chr1	20791855	20792070	PotentialPeaks_FAIRE_peak_254	160	.	4.30778	18.9215	16.0568	98
chr1	20810269	20810650	PotentialPeaks_FAIRE_peak_255	1628	.	14.3241	167.736	162.809	212
chr1	20835741	20835991	PotentialPeaks_FAIRE_peak_256	114	.	3.89275	14.2165	11.4723	124
chr1	20857576	20857919	PotentialPeaks_FAIRE_peak_257	284	.	5.67775	31.528	28.4159	150
chr1	20880474	20880815	PotentialPeaks_FAIRE_peak_258	416	.	6.38698	45.0225	41.6994	148
chr1	20881086	20881247	PotentialPeaks_FAIRE_peak_259	39	.	2.44102	6.36659	3.94118	64
chr1	20923596	20923807	PotentialPeaks_FAIRE_peak_260	114	.	3.89275	14.2165	11.4723	106
chr1	20929214	20929431	PotentialPeaks_FAIRE_peak_261	248	.	5.57371	27.8789	24.8305	108
chr1	20941379	20942017	PotentialPeaks_FAIRE_peak_262	651	.	7.7425	68.7755	65.1334	331
chr1	20974758	20974911	PotentialPeaks_FAIRE_peak_263	43	.	2.74262	6.82164	4.36435	71
chr1	21023388	21023540	PotentialPeaks_FAIRE_peak_264	58	.	3.00803	8.35443	5.81364	52
chr1	21069271	21069653	PotentialPeaks_FAIRE_peak_265	166	.	3.98153	19.5747	16.698	257
chr1	21091380	21091638	PotentialPeaks_FAIRE_peak_266	85	.	3.25589	11.2188	8.56649	139
chr1	21151956	21152161	PotentialPeaks_FAIRE_peak_267	216	.	4.61947	24.5902	21.6073	94
chr1	21156333	21156909	PotentialPeaks_FAIRE_peak_268	589	.	8.90666	62.517	58.9586	148
chr1	21179769	21179940	PotentialPeaks_FAIRE_peak_269	58	.	3.00803	8.35443	5.81364	72
chr1	21208557	21209112	PotentialPeaks_FAIRE_peak_270	153	.	4.42358	18.2118	15.3666	110
chr1	21334480	21334674	PotentialPeaks_FAIRE_peak_271	127	.	4.06969	15.5119	12.733	59
chr1	21401336	21401587	PotentialPeaks_FAIRE_peak_272	279	.	5.92759	31.0966	27.9909	139
chr1	21401774	21401931	PotentialPeaks_FAIRE_peak_273	68	.	3.18497	9.43818	6.85064	62
chr1	21451217	21451414	PotentialPeaks_FAIRE_peak_274	30	.	2.4772	5.40904	3.06515	111
chr1	21795180	21795374	PotentialPeaks_FAIRE_peak_275	96	.	3.62733	12.3462	9.65687	48
chr1	21810121	21810315	PotentialPeaks_FAIRE_peak_276	39	.	2.65415	6.3369	3.91272	113
chr1	21909425	21909602	PotentialPeaks_FAIRE_peak_277	79	.	3.36192	10.5685	7.93804	112
chr1	21928769	21928921	PotentialPeaks_FAIRE_peak_278	30	.	2.4772	5.40904	3.06515	121
chr1	21950814	21951026	PotentialPeaks_FAIRE_peak_279	93	.	3.48188	11.9823	9.30624	84
chr1	21951305	21951636	PotentialPeaks_FAIRE_peak_280	51	.	2.833	7.67728	5.17642	186
chr1	22252300	22252452	PotentialPeaks_FAIRE_peak_281	30	.	2.4772	5.40904	3.06515	74
chr1	22259118	22259349	PotentialPeaks_FAIRE_peak_282	380	.	6.98925	41.3421	38.0723	102
chr1	22375629	22375781	PotentialPeaks_FAIRE_peak_283	26	.	2.38873	4.96681	2.67217	58
chr1	22474035	22474187	PotentialPeaks_FAIRE_peak_284	63	.	3.0965	8.89034	6.32549	39
chr1	22539966	22540808	PotentialPeaks_FAIRE_peak_285	102	.	3.7158	12.9596	10.2517	309
chr1	22812632	22812787	PotentialPeaks_FAIRE_peak_286	63	.	3.0965	8.89034	6.32549	106
chr1	22812918	22813108	PotentialPeaks_FAIRE_peak_287	73	.	3.27345	9.99766	7.38818	110
chr1	23068866	23069140	PotentialPeaks_FAIRE_peak_288	188	.	4.86593	21.7771	18.8497	133
chr1	23262773	23263188	PotentialPeaks_FAIRE_peak_289	906	.	10.1468	94.7241	90.6972	210
chr1	23263539	23263931	PotentialPeaks_FAIRE_peak_290	139	.	3.8001	16.7152	13.9085	247
chr1	23271234	23271402	PotentialPeaks_FAIRE_peak_291	68	.	3.18497	9.43818	6.85064	36
chr1	23278480	23278632	PotentialPeaks_FAIRE_peak_292	63	.	3.0965	8.89034	6.32549	42
chr1	23293642	23293885	PotentialPeaks_FAIRE_peak_293	174	.	4.68899	20.3267	17.4305	100
chr1	23328351	23328509	PotentialPeaks_FAIRE_peak_294	39	.	2.65415	6.3369	3.91272	100
chr1	23390085	23390470	PotentialPeaks_FAIRE_peak_295	348	.	5.91606	38.0549	34.835	176
chr1	23497476	23497708	PotentialPeaks_FAIRE_peak_296	53	.	2.91956	7.83078	5.31581	94
chr1	23712458	23712672	PotentialPeaks_FAIRE_peak_297	140	.	4.24663	16.8441	14.0316	136
chr1	23725808	23726010	PotentialPeaks_FAIRE_peak_298	30	.	2.4772	5.40904	3.06515	97
chr1	23757841	23758018	PotentialPeaks_FAIRE_peak_299	73	.	3.27345	9.99766	7.38818	62
chr1	23768677	23768969	PotentialPeaks_FAIRE_peak_300	75	.	3.06679	10.1581	7.5443	151
chr1	23769668	23769956	PotentialPeaks_FAIRE_peak_301	454	.	6.89457	48.8531	45.4759	137
chr1	23799680	23799876	PotentialPeaks_FAIRE_peak_302	153	.	4.42358	18.2118	15.3666	73
chr1	23833994	23834279	PotentialPeaks_FAIRE_peak_303	262	.	5.55443	29.3514	26.2782	113
chr1	23874228	23874409	PotentialPeaks_FAIRE_peak_304	48	.	2.83109	7.31973	4.83219	111
chr1	23900733	23900911	PotentialPeaks_FAIRE_peak_305	26	.	2.38873	4.96681	2.67217	28
chr1	23927232	23927390	PotentialPeaks_FAIRE_peak_306	48	.	2.83109	7.31973	4.83219	118
chr1	23929168	23929405	PotentialPeaks_FAIRE_peak_307	312	.	6.28148	34.4167	31.2549	113
chr1	24012147	24012718	PotentialPeaks_FAIRE_peak_308	713	.	8.74255	75.0863	71.3553	338
chr1	24106983	24107528	PotentialPeaks_FAIRE_peak_309	514	.	7.2855	54.924	51.4655	320
chr1	24134815	24134967	PotentialPeaks_FAIRE_peak_310	34	.	2.56567	5.86589	3.47934	120
chr1	24143990	24144298	PotentialPeaks_FAIRE_peak_311	188	.	4.86593	21.7771	18.8497	170
chr1	24178410	24178596	PotentialPeaks_FAIRE_peak_312	174	.	4.68899	20.3267	17.4305	73
chr1	24256043	24256241	PotentialPeaks_FAIRE_peak_313	93	.	3.56115	12.0752	9.39696	109
chr1	24282757	24282970	PotentialPeaks_FAIRE_peak_314	30	.	2.4772	5.40904	3.06515	68
chr1	24293191	24293442	PotentialPeaks_FAIRE_peak_315	39	.	2.65415	6.3369	3.91272	161
chr1	24309586	24309844	PotentialPeaks_FAIRE_peak_316	323	.	6.34058	35.5633	32.3832	114
chr1	24374461	24374662	PotentialPeaks_FAIRE_peak_317	152	.	4.3894	18.0644	15.2252	109
chr1	24385416	24385617	PotentialPeaks_FAIRE_peak_318	43	.	2.74262	6.82164	4.36435	57
chr1	24459479	24459631	PotentialPeaks_FAIRE_peak_319	43	.	2.74262	6.82164	4.36435	100
chr1	24477889	24478103	PotentialPeaks_FAIRE_peak_320	19	.	2.21179	4.12806	1.95767	126
chr1	24593367	24593559	PotentialPeaks_FAIRE_peak_321	114	.	3.89275	14.2165	11.4723	81
chr1	24593625	24593879	PotentialPeaks_FAIRE_peak_322	34	.	2.56567	5.86589	3.47934	120
chr1	24619449	24619734	PotentialPeaks_FAIRE_peak_323	33313	.	58.3068	3336.97	3331.33	142
chr1	24685228	24685978	PotentialPeaks_FAIRE_peak_324	695	.	9.90881	73.2763	69.5708	174
chr1	24740899	24741114	PotentialPeaks_FAIRE_peak_325	217	.	5.21982	24.77	21.7817	132
chr1	24958244	24958408	PotentialPeaks_FAIRE_peak_326	127	.	4.06969	15.5119	12.733	109
chr1	25090606	25090857	PotentialPeaks_FAIRE_peak_327	140	.	4.24663	16.8441	14.0316	116
chr1	25144958	25145116	PotentialPeaks_FAIRE_peak_328	63	.	3.0965	8.89034	6.32549	70
chr1	25242559	25242818	PotentialPeaks_FAIRE_peak_329	39	.	2.65415	6.3369	3.91272	121
chr1	25285505	25285793	PotentialPeaks_FAIRE_peak_330	271	.	5.83912	30.2823	27.1908	144
chr1	25567273	25567444	PotentialPeaks_FAIRE_peak_331	120	.	3.98122	14.8595	12.0979	98
chr1	25870051	25870203	PotentialPeaks_FAIRE_peak_332	39	.	2.65415	6.3369	3.91272	123
chr1	25886850	25887019	PotentialPeaks_FAIRE_peak_333	35	.	2.43129	5.92098	3.53166	127
chr1	25887409	25887872	PotentialPeaks_FAIRE_peak_334	55	.	2.80158	8.06986	5.54651	352
chr1	25949263	25949458	PotentialPeaks_FAIRE_peak_335	146	.	4.3351	17.5236	14.6947	101
chr1	26286597	26286820	PotentialPeaks_FAIRE_peak_336	58	.	3.00803	8.35443	5.81364	74
chr1	26742917	26743116	PotentialPeaks_FAIRE_peak_337	153	.	3.57316	18.2	15.3581	110
chr1	26743246	26743443	PotentialPeaks_FAIRE_peak_338	163	.	3.66328	19.2629	16.3921	71
chr1	26743729	26743918	PotentialPeaks_FAIRE_peak_339	105	.	3.09102	13.2592	10.5444	120
chr1	26744090	26744614	PotentialPeaks_FAIRE_peak_340	338	.	5.18482	37.0511	33.8466	301
chr1	26744757	26745224	PotentialPeaks_FAIRE_peak_341	260	.	4.61393	29.1212	26.0514	205
chr1	28622679	28622906	PotentialPeaks_FAIRE_peak_342	248	.	5.57371	27.8789	24.8305	122
chr1	29328012	29328214	PotentialPeaks_FAIRE_peak_343	127	.	4.06969	15.5119	12.733	99
chr1	30201951	30202144	PotentialPeaks_FAIRE_peak_344	63	.	3.0965	8.89034	6.32549	95
chr1	30552388	30552740	PotentialPeaks_FAIRE_peak_345	48	.	2.83109	7.31973	4.83219	240
chr1	30560237	30560397	PotentialPeaks_FAIRE_peak_346	39	.	2.65415	6.3369	3.91272	66
chr1	30641777	30642004	PotentialPeaks_FAIRE_peak_347	131	.	4.09859	15.9201	13.1328	145
chr1	30645858	30646065	PotentialPeaks_FAIRE_peak_348	35	.	2.55493	5.97505	3.58293	122
chr1	30694432	30694584	PotentialPeaks_FAIRE_peak_349	26	.	2.38873	4.96681	2.67217	50
chr1	30797783	30797954	PotentialPeaks_FAIRE_peak_350	73	.	3.27345	9.99766	7.38818	102
chr1	30929625	30930012	PotentialPeaks_FAIRE_peak_351	137	.	3.87864	16.5784	13.7744	208
chr1	30930365	30931016	PotentialPeaks_FAIRE_peak_352	418	.	6.65212	45.1901	41.8648	473
chr1	31005269	31005444	PotentialPeaks_FAIRE_peak_353	140	.	4.00209	16.8998	14.0862	102
chr1	31006552	31007241	PotentialPeaks_FAIRE_peak_354	799	.	9.95163	83.8102	79.9507	153
chr1	31210895	31211095	PotentialPeaks_FAIRE_peak_355	225	.	5.30829	25.5367	22.5333	117
chr1	31267080	31267283	PotentialPeaks_FAIRE_peak_356	296	.	6.10453	32.7442	29.6103	92
chr1	31290558	31290746	PotentialPeaks_FAIRE_peak_357	39	.	2.65415	6.3369	3.91272	47
chr1	32229314	32229847	PotentialPeaks_FAIRE_peak_358	498	.	8.13938	53.3255	49.8879	197
chr1	32419356	32419515	PotentialPeaks_FAIRE_peak_359	73	.	3.27345	9.99766	7.38818	91
chr1	32641938	32642128	PotentialPeaks_FAIRE_peak_360	102	.	3.7158	12.9596	10.2517	110
chr1	33099332	33099523	PotentialPeaks_FAIRE_peak_361	96	.	3.62733	12.3462	9.65687	65
chr1	33317834	33318048	PotentialPeaks_FAIRE_peak_362	90	.	3.53886	11.743	9.0727	92
chr1	33493119	33493353	PotentialPeaks_FAIRE_peak_363	30	.	2.4772	5.40904	3.06515	121
chr1	33521252	33521466	PotentialPeaks_FAIRE_peak_364	30	.	2.4772	5.40904	3.06515	177
chr1	33551784	33551960	PotentialPeaks_FAIRE_peak_365	59	.	3.00417	8.5314	5.98491	74
chr1	33639443	33639629	PotentialPeaks_FAIRE_peak_366	30	.	2.4772	5.40904	3.06515	122
chr1	33704131	33704315	PotentialPeaks_FAIRE_peak_367	83	.	3.41003	10.988	8.34658	78
chr1	33726518	33726823	PotentialPeaks_FAIRE_peak_368	389	.	6.19874	42.1883	38.9073	159
chr1	33727142	33727480	PotentialPeaks_FAIRE_peak_369	274	.	5.2039	30.5728	27.4769	199
chr1	33776590	33777422	PotentialPeaks_FAIRE_peak_370	186	.	4.53019	21.5449	18.6243	150
chr1	33790928	33791103	PotentialPeaks_FAIRE_peak_371	61	.	2.99965	8.70494	6.15273	63
chr1	33796273	33796503	PotentialPeaks_FAIRE_peak_372	184	.	4.56574	21.3964	18.4784	114
chr1	33799793	33799968	PotentialPeaks_FAIRE_peak_373	88	.	3.36689	11.4887	8.82955	101
chr1	33813958	33814110	PotentialPeaks_FAIRE_peak_374	53	.	2.83697	7.86838	5.35207	116
chr1	33870468	33870807	PotentialPeaks_FAIRE_peak_375	76	.	3.17164	10.2156	7.6002	87
chr1	33871140	33871608	PotentialPeaks_FAIRE_peak_376	545	.	8.03906	58.0971	54.5966	267
chr1	33949698	33949902	PotentialPeaks_FAIRE_peak_377	73	.	3.27345	9.99766	7.38818	115
chr1	33950668	33950829	PotentialPeaks_FAIRE_peak_378	34	.	2.55613	5.83183	3.46409	115
chr1	33964265	33964506	PotentialPeaks_FAIRE_peak_379	110	.	3.50375	13.7352	11.0056	150
chr1	33964828	33964980	PotentialPeaks_FAIRE_peak_380	63	.	2.86646	8.87805	6.32016	46
chr1	33988573	33988861	PotentialPeaks_FAIRE_peak_381	48	.	2.83109	7.31973	4.83219	217
chr1	34021581	34021743	PotentialPeaks_FAIRE_peak_382	69	.	2.92347	9.50017	6.91084	78
chr1	34023280	34023436	PotentialPeaks_FAIRE_peak_383	92	.	3.22695	11.9374	9.26256	72
chr1	34026937	34027103	PotentialPeaks_FAIRE_peak_384	72	.	3.09306	9.87722	7.277	82
chr1	34036435	34036587	PotentialPeaks_FAIRE_peak_385	48	.	2.79228	7.34596	4.8575	86
chr1	34062551	34063140	PotentialPeaks_FAIRE_peak_386	267	.	5.00817	29.8273	26.7448	134
chr1	34067908	34068136	PotentialPeaks_FAIRE_peak_387	81	.	3.11227	10.7671	8.13152	106
chr1	34068219	34068482	PotentialPeaks_FAIRE_peak_388	116	.	3.65114	14.4424	11.6933	151
chr1	34069015	34069167	PotentialPeaks_FAIRE_peak_389	52	.	2.7772	7.79686	5.29146	74
chr1	34099241	34099427	PotentialPeaks_FAIRE_peak_390	24	.	2.30243	4.66834	2.42197	101
chr1	34102615	34102814	PotentialPeaks_FAIRE_peak_391	60	.	3.01206	8.56227	6.0147	115
chr1	34117290	34117456	PotentialPeaks_FAIRE_peak_392	55	.	2.77162	8.11167	5.58694	84
chr1	34118010	34118273	PotentialPeaks_FAIRE_peak_393	109	.	3.58778	13.6515	10.9238	138
chr1	34131542	34132003	PotentialPeaks_FAIRE_peak_394	112	.	3.84209	14.005	11.2694	310
chr1	34160559	34160905	PotentialPeaks_FAIRE_peak_395	178	.	4.64779	20.8033	17.8986	202
chr1	34189882	34190054	PotentialPeaks_FAIRE_peak_396	49	.	2.8251	7.47189	4.97867	87
chr1	34200304	34200489	PotentialPeaks_FAIRE_peak_397	30	.	2.4772	5.40904	3.06515	74
chr1	34207602	34207907	PotentialPeaks_FAIRE_peak_398	186	.	4.82834	21.6114	18.6896	171
chr1	34215741	34216017	PotentialPeaks_FAIRE_peak_399	127	.	4.06548	15.4941	12.7192	132
chr1	34221548	34221776	PotentialPeaks_FAIRE_peak_400	263	.	5.75065	29.4746	26.3973	125
chr1	34247119	34247370	PotentialPeaks_FAIRE_peak_401	34	.	2.44845	5.85401	3.47934	102
chr1	34275263	34275447	PotentialPeaks_FAIRE_peak_402	186	.	4.59888	21.5553	18.6345	101
chr1	34293234	34293482	PotentialPeaks_FAIRE_peak_403	163	.	4.30888	19.2298	16.3594	97
chr1	34321357	34321545	PotentialPeaks_FAIRE_peak_404	53	.	2.91956	7.83078	5.31581	83
chr1	34356483	34356640	PotentialPeaks_FAIRE_peak_405	48	.	2.74573	7.33291	4.84489	64
chr1	34403122	34403274	PotentialPeaks_FAIRE_peak_406	34	.	2.56567	5.86589	3.47934	114
chr1	34491608	34492033	PotentialPeaks_FAIRE_peak_407	104	.	3.07322	13.1533	10.441	138
chr1	34496136	34496897	PotentialPeaks_FAIRE_peak_408	890	.	8.60534	93.009	89.0091	149
chr1	34516332	34516695	PotentialPeaks_FAIRE_peak_409	696	.	9.03401	73.3963	69.6891	212
chr1	34636378	34636649	PotentialPeaks_FAIRE_peak_410	382	.	6.83612	41.5473	38.2749	140
chr1	34646374	34646548	PotentialPeaks_FAIRE_peak_411	23	.	2.30026	4.53965	2.30247	130
chr1	34659297	34659506	PotentialPeaks_FAIRE_peak_412	188	.	4.86593	21.7771	18.8497	131
chr1	34699322	34699635	PotentialPeaks_FAIRE_peak_413	527	.	8.40479	56.2076	52.7314	183
chr1	34722103	34722440	PotentialPeaks_FAIRE_peak_414	29	.	2.26573	5.24401	2.93206	93
chr1	34723194	34723416	PotentialPeaks_FAIRE_peak_415	41	.	2.50052	6.62469	4.18765	103
chr1	34757633	34757820	PotentialPeaks_FAIRE_peak_416	99	.	3.46742	12.6227	9.92691	93
chr1	34759688	34759916	PotentialPeaks_FAIRE_peak_417	27	.	2.36615	5.01705	2.71922	149
chr1	34795315	34795483	PotentialPeaks_FAIRE_peak_418	73	.	3.27345	9.99766	7.38818	34
chr1	34806424	34806836	PotentialPeaks_FAIRE_peak_419	62	.	2.92804	8.78461	6.22976	119
chr1	34858470	34858653	PotentialPeaks_FAIRE_peak_420	171	.	4.35114	20.0428	17.1547	79
chr1	34899815	34900127	PotentialPeaks_FAIRE_peak_421	403	.	6.30337	43.6587	40.3557	132
chr1	34906606	34906921	PotentialPeaks_FAIRE_peak_422	333	.	5.94078	36.5375	33.3421	187
chr1	34924096	34924321	PotentialPeaks_FAIRE_peak_423	293	.	5.69862	32.4295	29.3022	123
chr1	34948477	34948746	PotentialPeaks_FAIRE_peak_424	181	.	4.77746	21.048	18.1362	130
chr1	34953861	34954031	PotentialPeaks_FAIRE_peak_425	97	.	3.5909	12.4421	9.75059	87
chr1	35089544	35089733	PotentialPeaks_FAIRE_peak_426	73	.	3.27345	9.99766	7.38818	117
chr1	35163610	35163827	PotentialPeaks_FAIRE_peak_427	90	.	3.53886	11.743	9.0727	116
chr1	35258534	35258751	PotentialPeaks_FAIRE_peak_428	48	.	2.83109	7.31973	4.83219	196
chr1	35314413	35314599	PotentialPeaks_FAIRE_peak_429	108	.	3.80427	13.5831	10.857	92
chr1	35415972	35416195	PotentialPeaks_FAIRE_peak_430	34	.	2.56567	5.86589	3.47934	72
chr1	35442308	35442806	PotentialPeaks_FAIRE_peak_431	246	.	5.06652	27.6573	24.6146	128
chr1	35456458	35456685	PotentialPeaks_FAIRE_peak_432	39	.	2.65415	6.3369	3.91272	98
chr1	35471857	35472010	PotentialPeaks_FAIRE_peak_433	23	.	2.30026	4.53965	2.30247	62
chr1	35473199	35473481	PotentialPeaks_FAIRE_peak_434	63	.	3.0965	8.89034	6.32549	215
chr1	35509723	35509875	PotentialPeaks_FAIRE_peak_435	30	.	2.4772	5.40904	3.06515	26
chr1	35514464	35514776	PotentialPeaks_FAIRE_peak_436	48	.	2.78868	7.33211	4.84415	99
chr1	35521999	35522185	PotentialPeaks_FAIRE_peak_437	84	.	3.33983	11.1486	8.49965	82
chr1	35525226	35525497	PotentialPeaks_FAIRE_peak_438	26	.	2.30223	4.91018	2.64614	244
chr1	35584841	35585138	PotentialPeaks_FAIRE_peak_439	72	.	3.17437	9.81205	7.21372	114
chr1	35632120	35632284	PotentialPeaks_FAIRE_peak_440	28	.	2.40965	5.17126	2.86377	32
chr1	35700123	35700285	PotentialPeaks_FAIRE_peak_441	53	.	2.91956	7.83078	5.31581	43
chr1	35751286	35751438	PotentialPeaks_FAIRE_peak_442	77	.	3.10484	10.3303	7.71176	102
chr1	35751985	35752380	PotentialPeaks_FAIRE_peak_443	266	.	5.32068	29.7155	26.6345	205
chr1	35896415	35896656	PotentialPeaks_FAIRE_peak_444	48	.	2.83109	7.31973	4.83219	189
chr1	35926320	35926949	PotentialPeaks_FAIRE_peak_445	320	.	6.36995	35.262	32.0863	363
chr1	35936420	35936609	PotentialPeaks_FAIRE_peak_446	93	.	3.48188	11.9823	9.30624	90
chr1	35961021	35961218	PotentialPeaks_FAIRE_peak_447	26	.	2.38873	4.96681	2.67217	101
chr1	35970742	35970894	PotentialPeaks_FAIRE_peak_448	39	.	2.65415	6.3369	3.91272	100
chr1	35998578	35998931	PotentialPeaks_FAIRE_peak_449	31	.	2.33672	5.53596	3.18504	95
chr1	36001210	36001428	PotentialPeaks_FAIRE_peak_450	63	.	2.8328	8.90152	6.33639	95
chr1	36030278	36030440	PotentialPeaks_FAIRE_peak_451	39	.	2.65415	6.3369	3.91272	80
chr1	36039076	36039348	PotentialPeaks_FAIRE_peak_452	29	.	2.41025	5.30599	2.99002	121
chr1	36060325	36060783	PotentialPeaks_FAIRE_peak_453	170	.	4.09381	19.9078	17.0223	275
chr1	36073835	36074415	PotentialPeaks_FAIRE_peak_454	301	.	5.34703	33.2415	30.1003	343
chr1	36121730	36122078	PotentialPeaks_FAIRE_peak_455	1028	.	8.76357	107.05	102.829	185
chr1	36124973	36125252	PotentialPeaks_FAIRE_peak_456	262	.	4.37069	29.3668	26.2933	142
chr1	36182061	36182334	PotentialPeaks_FAIRE_peak_457	57	.	2.84764	8.26425	5.7341	124
chr1	36191573	36191746	PotentialPeaks_FAIRE_peak_458	178	.	4.36156	20.7078	17.8048	56
chr1	36202038	36202213	PotentialPeaks_FAIRE_peak_459	127	.	3.77016	15.5216	12.7425	86
chr1	36300970	36301341	PotentialPeaks_FAIRE_peak_460	523	.	7.52093	55.7782	52.3082	222
chr1	36309686	36309990	PotentialPeaks_FAIRE_peak_461	197	.	4.49991	22.666	19.7205	124
chr1	36330432	36330587	PotentialPeaks_FAIRE_peak_462	45	.	2.74308	6.98973	4.52546	103
chr1	36334225	36334378	PotentialPeaks_FAIRE_peak_463	67	.	3.11065	9.34837	6.76949	80
chr1	36336088	36336348	PotentialPeaks_FAIRE_peak_464	254	.	5.61844	28.4745	25.4168	117
chr1	36364359	36364686	PotentialPeaks_FAIRE_peak_465	793	.	8.6206	83.1841	79.3334	159
chr1	36371878	36372083	PotentialPeaks_FAIRE_peak_466	46	.	2.68291	7.08228	4.61433	111
chr1	36380969	36381121	PotentialPeaks_FAIRE_peak_467	64	.	3.02151	8.98582	6.41803	121
chr1	36425892	36426190	PotentialPeaks_FAIRE_peak_468	444	.	6.96138	47.8139	44.451	127
chr1	36502004	36502382	PotentialPeaks_FAIRE_peak_469	1521	.	13.8218	157.057	152.186	190
chr1	36528109	36528489	PotentialPeaks_FAIRE_peak_470	230	.	4.64599	26.0466	23.035	255
chr1	36558239	36558450	PotentialPeaks_FAIRE_peak_471	173	.	4.46189	20.2643	17.3722	94
chr1	36568267	36568811	PotentialPeaks_FAIRE_peak_472	750	.	8.3085	78.8797	75.0928	385
chr1	36603955	36604458	PotentialPeaks_FAIRE_peak_473	1558	.	12.3978	160.73	155.837	199
chr1	36613364	36614246	PotentialPeaks_FAIRE_peak_474	412	.	5.1649	44.5666	41.2506	245
chr1	36615015	36615260	PotentialPeaks_FAIRE_peak_475	201	.	3.67157	23.0811	20.1286	116
chr1	36637249	36637678	PotentialPeaks_FAIRE_peak_476	172	.	4.04178	20.1904	17.2997	206
chr1	36652828	36653212	PotentialPeaks_FAIRE_peak_477	53	.	2.7414	7.81384	5.30779	254
chr1	36691882	36692181	PotentialPeaks_FAIRE_peak_478	102	.	3.43571	12.941	10.2378	116
chr1	36698646	36698798	PotentialPeaks_FAIRE_peak_479	32	.	2.48917	5.59174	3.23763	106
chr1	36741007	36741252	PotentialPeaks_FAIRE_peak_480	329	.	6.01726	36.1075	32.9197	120
chr1	36748049	36748445	PotentialPeaks_FAIRE_peak_481	1156	.	11.2401	120.084	115.653	245
chr1	36766179	36766379	PotentialPeaks_FAIRE_peak_482	81	.	2.88573	10.763	8.12755	102
chr1	36766705	36767099	PotentialPeaks_FAIRE_peak_483	1172	.	10.6367	121.717	117.26	238
chr1	36794241	36794473	PotentialPeaks_FAIRE_peak_484	271	.	5.83912	30.2823	27.1908	121
chr1	36841591	36841860	PotentialPeaks_FAIRE_peak_485	130	.	3.95708	15.8598	13.0738	90
chr1	36893631	36893783	PotentialPeaks_FAIRE_peak_486	30	.	2.4772	5.40904	3.06515	133
chr1	36912264	36912492	PotentialPeaks_FAIRE_peak_487	37	.	2.61264	6.18615	3.78357	100
chr1	36977236	36977480	PotentialPeaks_FAIRE_peak_488	107	.	3.70391	13.4197	10.7012	149
chr1	36978867	36979035	PotentialPeaks_FAIRE_peak_489	27	.	2.3631	5.00622	2.70903	114
chr1	36996349	36996536	PotentialPeaks_FAIRE_peak_490	90	.	3.14409	11.7342	9.06891	105
chr1	36996678	36997040	PotentialPeaks_FAIRE_peak_491	343	.	5.69578	37.6009	34.3888	131
chr1	37085979	37086321	PotentialPeaks_FAIRE_peak_492	639	.	8.39535	67.5428	63.9177	146
chr1	37144233	37144385	PotentialPeaks_FAIRE_peak_493	46	.	2.78312	7.14041	4.67012	64
chr1	37251549	37251714	PotentialPeaks_FAIRE_peak_494	58	.	3.00803	8.35443	5.81364	94
chr1	37271124	37271308	PotentialPeaks_FAIRE_peak_495	68	.	3.18497	9.43818	6.85064	108
chr1	37277061	37277336	PotentialPeaks_FAIRE_peak_496	155	.	4.40636	18.4482	15.5985	141
chr1	37307587	37307789	PotentialPeaks_FAIRE_peak_497	315	.	6.24545	34.6819	31.5162	95
chr1	37329350	37329645	PotentialPeaks_FAIRE_peak_498	268	.	5.6765	29.9311	26.8471	123
chr1	37356486	37356891	PotentialPeaks_FAIRE_peak_499	385	.	6.44476	41.8133	38.5372	183
chr1	37357053	37357286	PotentialPeaks_FAIRE_peak_500	53	.	2.75073	7.85369	5.33791	102
chr1	37390949	37391101	PotentialPeaks_FAIRE_peak_501	32	.	2.42574	5.63054	3.2743	93
chr1	37486783	37487107	PotentialPeaks_FAIRE_peak_502	726	.	9.06673	76.4369	72.6856	185
chr1	37548779	37548931	PotentialPeaks_FAIRE_peak_503	63	.	3.0965	8.89034	6.32549	68
chr1	37575694	37575929	PotentialPeaks_FAIRE_peak_504	34	.	2.56567	5.86589	3.47934	100
chr1	37597841	37598380	PotentialPeaks_FAIRE_peak_505	214	.	4.85438	24.4714	21.4905	185
chr1	37622370	37622528	PotentialPeaks_FAIRE_peak_506	39	.	2.65415	6.3369	3.91272	96
chr1	37655640	37655805	PotentialPeaks_FAIRE_peak_507	30	.	2.45478	5.33034	3.01263	88
chr1	37672220	37672400	PotentialPeaks_FAIRE_peak_508	37	.	2.44988	6.13254	3.73261	132
chr1	37691589	37691793	PotentialPeaks_FAIRE_peak_509	192	.	4.54014	22.2345	19.2993	97
chr1	37696104	37696357	PotentialPeaks_FAIRE_peak_510	206	.	4.96023	23.5913	20.6276	118
chr1	37735298	37735554	PotentialPeaks_FAIRE_peak_511	160	.	4.51205	18.9085	16.0441	131
chr1	37776773	37776934	PotentialPeaks_FAIRE_peak_512	48	.	2.83109	7.31973	4.83219	68
chr1	37799647	37799905	PotentialPeaks_FAIRE_peak_513	68	.	3.18497	9.43818	6.85064	109
chr1	37921559	37922312	PotentialPeaks_FAIRE_peak_514	1022	.	9.32006	106.419	102.207	388
chr1	37928638	37929457	PotentialPeaks_FAIRE_peak_515	244	.	4.96742	27.4859	24.4459	457
chr1	37946994	37947522	PotentialPeaks_FAIRE_peak_516	616	.	8.77579	65.2252	61.6312	260
chr1	37960128	37960310	PotentialPeaks_FAIRE_peak_517	34	.	2.56567	5.86589	3.47934	40
chr1	38016473	38016649	PotentialPeaks_FAIRE_peak_518	73	.	3.27345	9.99766	7.38818	52
chr1	38042725	38042915	PotentialPeaks_FAIRE_peak_519	43	.	2.74262	6.82164	4.36435	105
chr1	38053729	38054358	PotentialPeaks_FAIRE_peak_520	1181	.	10.5037	122.636	118.165	433
chr1	38054690	38055063	PotentialPeaks_FAIRE_peak_521	607	.	7.15759	64.2974	60.7157	200
chr1	38093326	38093598	PotentialPeaks_FAIRE_peak_522	23	.	2.29788	4.53162	2.30247	52
chr1	38185866	38186019	PotentialPeaks_FAIRE_peak_523	55	.	2.75934	8.05814	5.53522	114
chr1	38186452	38187159	PotentialPeaks_FAIRE_peak_524	385	.	6.28559	41.818	38.5418	521
chr1	38242443	38242673	PotentialPeaks_FAIRE_peak_525	315	.	5.61623	34.7667	31.5998	105
chr1	38257166	38257318	PotentialPeaks_FAIRE_peak_526	69	.	2.89469	9.54714	6.95643	104
chr1	38259749	38259949	PotentialPeaks_FAIRE_peak_527	79	.	3.02933	10.5689	7.93844	93
chr1	38279094	38279274	PotentialPeaks_FAIRE_peak_528	46	.	2.78682	7.15428	4.68345	63
chr1	38304966	38305238	PotentialPeaks_FAIRE_peak_529	93	.	3.1653	12.0475	9.36996	139
chr1	38319434	38319586	PotentialPeaks_FAIRE_peak_530	43	.	2.57864	6.81079	4.36435	83
chr1	38320227	38320423	PotentialPeaks_FAIRE_peak_531	32	.	2.39805	5.65512	3.29733	111
chr1	38325592	38325801	PotentialPeaks_FAIRE_peak_532	101	.	3.51704	12.8465	10.1455	116
chr1	38360586	38360738	PotentialPeaks_FAIRE_peak_533	39	.	2.65415	6.3369	3.91272	59
chr1	38373741	38373936	PotentialPeaks_FAIRE_peak_534	48	.	2.83109	7.31973	4.83219	84
chr1	38378280	38378450	PotentialPeaks_FAIRE_peak_535	31	.	2.4347	5.52991	3.17935	140
chr1	38390761	38390919	PotentialPeaks_FAIRE_peak_536	26	.	2.38873	4.96681	2.67217	104
chr1	38418935	38419116	PotentialPeaks_FAIRE_peak_537	35	.	2.47737	5.96756	3.5758	122
chr1	38441446	38441624	PotentialPeaks_FAIRE_peak_538	59	.	2.98852	8.47004	5.92543	69
chr1	38449915	38450068	PotentialPeaks_FAIRE_peak_539	100	.	3.302	12.7401	10.0417	54
chr1	38452089	38452362	PotentialPeaks_FAIRE_peak_540	35	.	2.36343	5.8998	3.51152	88
chr1	38458789	38458951	PotentialPeaks_FAIRE_peak_541	79	.	3.15828	10.5704	7.93988	70
chr1	38474298	38474453	PotentialPeaks_FAIRE_peak_542	37	.	2.61264	6.18615	3.78357	39
chr1	38482816	38483067	PotentialPeaks_FAIRE_peak_543	30	.	2.46136	5.35348	3.0342	151
chr1	38495372	38495692	PotentialPeaks_FAIRE_peak_544	66	.	2.75742	9.2212	6.64628	153
chr1	38496658	38496882	PotentialPeaks_FAIRE_peak_545	127	.	3.48622	15.5333	12.7539	110
chr1	38507651	38507821	PotentialPeaks_FAIRE_peak_546	52	.	2.81262	7.77041	5.26602	85
chr1	38517845	38518061	PotentialPeaks_FAIRE_peak_547	26	.	2.38626	4.9583	2.67217	65
chr1	38524596	38524750	PotentialPeaks_FAIRE_peak_548	79	.	3.36192	10.5685	7.93804	64
chr1	38532416	38532591	PotentialPeaks_FAIRE_peak_549	43	.	2.74262	6.82164	4.36435	32
chr1	38546561	38546722	PotentialPeaks_FAIRE_peak_550	36	.	2.56828	6.02403	3.62951	52
chr1	38578261	38578431	PotentialPeaks_FAIRE_peak_551	34	.	2.56567	5.86589	3.47934	48
chr1	38594172	38594338	PotentialPeaks_FAIRE_peak_552	33	.	2.48706	5.72464	3.36298	97
chr1	38602527	38602815	PotentialPeaks_FAIRE_peak_553	61	.	2.85728	8.65954	6.10883	146
chr1	38622784	38623028	PotentialPeaks_FAIRE_peak_554	38	.	2.45185	6.27724	3.87002	167
chr1	38652272	38652506	PotentialPeaks_FAIRE_peak_555	57	.	2.93123	8.24424	5.71482	99
chr1	38688439	38688608	PotentialPeaks_FAIRE_peak_556	53	.	2.60993	7.8569	5.34101	43
chr1	38704385	38704560	PotentialPeaks_FAIRE_peak_557	43	.	2.64218	6.76234	4.31916	116
chr1	38735254	38735406	PotentialPeaks_FAIRE_peak_558	26	.	2.38873	4.96681	2.67217	132
chr1	38771598	38771807	PotentialPeaks_FAIRE_peak_559	51	.	2.87773	7.67248	5.17185	68
chr1	38823795	38824084	PotentialPeaks_FAIRE_peak_560	105	.	3.3141	13.2408	10.5265	148
chr1	38824784	38825008	PotentialPeaks_FAIRE_peak_561	198	.	4.24213	22.783	19.8356	123
chr1	38826852	38827035	PotentialPeaks_FAIRE_peak_562	135	.	3.59094	16.3566	13.5571	77
chr1	38830802	38831005	PotentialPeaks_FAIRE_peak_563	23	.	2.21632	4.59181	2.35085	113
chr1	38844341	38844598	PotentialPeaks_FAIRE_peak_564	366	.	5.68524	39.9282	36.6802	133
chr1	38845854	38846047	PotentialPeaks_FAIRE_peak_565	62	.	2.67732	8.81333	6.25761	101
chr1	38846831	38847234	PotentialPeaks_FAIRE_peak_566	237	.	4.55736	26.8249	23.7986	224
chr1	38856304	38856519	PotentialPeaks_FAIRE_peak_567	119	.	3.55534	14.7092	11.9545	122
chr1	38873193	38873395	PotentialPeaks_FAIRE_peak_568	63	.	3.0965	8.89034	6.32549	73
chr1	38873871	38874218	PotentialPeaks_FAIRE_peak_569	48	.	2.83109	7.31973	4.83219	210
chr1	38891814	38892033	PotentialPeaks_FAIRE_peak_570	141	.	4.1451	16.9893	14.1739	128
chr1	38893397	38893585	PotentialPeaks_FAIRE_peak_571	75	.	3.25315	10.1325	7.51936	54
chr1	38904777	38905227	PotentialPeaks_FAIRE_peak_572	407	.	6.53528	44.0915	40.7816	308
chr1	38913125	38913335	PotentialPeaks_FAIRE_peak_573	294	.	5.65543	32.6062	29.4762	100
chr1	38950393	38950697	PotentialPeaks_FAIRE_peak_574	28	.	2.30205	5.15176	2.84552	79
chr1	38954475	38954627	PotentialPeaks_FAIRE_peak_575	63	.	2.84179	8.94291	6.37645	102
chr1	38954843	38955111	PotentialPeaks_FAIRE_peak_576	108	.	3.46593	13.5511	10.8297	148
chr1	39044264	39044966	PotentialPeaks_FAIRE_peak_577	995	.	10.1163	103.749	99.5794	301
chr1	39058052	39058321	PotentialPeaks_FAIRE_peak_578	487	.	7.58774	52.1231	48.7024	132
chr1	39064409	39064619	PotentialPeaks_FAIRE_peak_579	43	.	2.61675	6.81579	4.36435	111
chr1	39067621	39067857	PotentialPeaks_FAIRE_peak_580	184	.	4.49334	21.3637	18.4462	129
chr1	39097303	39097569	PotentialPeaks_FAIRE_peak_581	43	.	2.74262	6.82164	4.36435	134
chr1	39120481	39120703	PotentialPeaks_FAIRE_peak_582	39	.	2.65415	6.3369	3.91272	40
chr1	39125873	39126044	PotentialPeaks_FAIRE_peak_583	34	.	2.56567	5.86589	3.47934	102
chr1	39397626	39397878	PotentialPeaks_FAIRE_peak_584	89	.	3.30488	11.6578	8.9943	131
chr1	39424476	39424808	PotentialPeaks_FAIRE_peak_585	625	.	8.06684	66.1473	62.5409	196
chr1	39449126	39449341	PotentialPeaks_FAIRE_peak_586	188	.	4.86593	21.7771	18.8497	91
chr1	39535489	39535847	PotentialPeaks_FAIRE_peak_587	461	.	6.55025	49.5666	46.1794	145
chr1	39539325	39539516	PotentialPeaks_FAIRE_peak_588	61	.	2.82628	8.69723	6.14542	123
chr1	39572579	39572737	PotentialPeaks_FAIRE_peak_589	68	.	3.18497	9.43818	6.85064	40
chr1	39579480	39579689	PotentialPeaks_FAIRE_peak_590	73	.	3.27345	9.99766	7.38818	102
chr1	39584368	39584570	PotentialPeaks_FAIRE_peak_591	104	.	3.5811	13.1329	10.421	102
chr1	39587142	39587449	PotentialPeaks_FAIRE_peak_592	270	.	5.55851	30.1514	27.0638	176
chr1	39592323	39592719	PotentialPeaks_FAIRE_peak_593	684	.	8.5344	72.1769	68.4874	214
chr1	39612733	39613246	PotentialPeaks_FAIRE_peak_594	121	.	3.91755	14.8639	12.1021	118
chr1	39634126	39634494	PotentialPeaks_FAIRE_peak_595	751	.	9.01056	78.9558	75.1679	149
chr1	39707541	39707938	PotentialPeaks_FAIRE_peak_596	133	.	4.07201	16.0909	13.3001	289
chr1	39708114	39708322	PotentialPeaks_FAIRE_peak_597	50	.	2.83994	7.52861	5.03331	121
chr1	39729571	39729763	PotentialPeaks_FAIRE_peak_598	87	.	3.44688	11.3685	8.71234	73
chr1	39742767	39742996	PotentialPeaks_FAIRE_peak_599	293	.	5.55689	32.4843	29.3561	122
chr1	39792558	39792751	PotentialPeaks_FAIRE_peak_600	37	.	2.57321	6.19143	3.78851	142
chr1	39792894	39793408	PotentialPeaks_FAIRE_peak_601	78	.	3.2746	10.4358	7.81432	98
chr1	39818328	39818579	PotentialPeaks_FAIRE_peak_602	66	.	2.90949	9.25286	6.67693	71
chr1	39830940	39831092	PotentialPeaks_FAIRE_peak_603	30	.	2.4772	5.40904	3.06515	138
chr1	39895578	39895898	PotentialPeaks_FAIRE_peak_604	118	.	3.69313	14.6409	11.8876	169
chr1	39925733	39925931	PotentialPeaks_FAIRE_peak_605	28	.	2.40019	5.13781	2.83243	122
chr1	39941582	39941923	PotentialPeaks_FAIRE_peak_606	118	.	3.92418	14.6197	11.8669	204
chr1	39957032	39957226	PotentialPeaks_FAIRE_peak_607	59	.	2.60634	8.44782	5.90403	69
chr1	39957515	39957758	PotentialPeaks_FAIRE_peak_608	208	.	4.21484	23.8065	20.8391	122
chr1	39958964	39959294	PotentialPeaks_FAIRE_peak_609	32	.	2.23999	5.59414	3.23999	254
chr1	39993229	39993667	PotentialPeaks_FAIRE_peak_610	239	.	4.75894	27.0213	23.9918	297
chr1	40004609	40004797	PotentialPeaks_FAIRE_peak_611	53	.	2.76327	7.90714	5.38948	78
chr1	40018988	40019205	PotentialPeaks_FAIRE_peak_612	35	.	2.55161	5.96287	3.57136	94
chr1	40022110	40022266	PotentialPeaks_FAIRE_peak_613	43	.	2.72143	6.74366	4.30123	58
chr1	40090661	40090860	PotentialPeaks_FAIRE_peak_614	53	.	2.84048	7.88249	5.36569	90
chr1	40173350	40173546	PotentialPeaks_FAIRE_peak_615	114	.	3.89275	14.2165	11.4723	95
chr1	40435681	40435977	PotentialPeaks_FAIRE_peak_616	461	.	7.38412	49.5723	46.1851	146
chr1	40601599	40601798	PotentialPeaks_FAIRE_peak_617	307	.	6.08439	33.9188	30.766	114
chr1	40636701	40636908	PotentialPeaks_FAIRE_peak_618	96	.	3.62733	12.3462	9.65687	119
chr1	40714959	40715111	PotentialPeaks_FAIRE_peak_619	48	.	2.83109	7.31973	4.83219	120
chr1	40751323	40751533	PotentialPeaks_FAIRE_peak_620	63	.	3.0965	8.89034	6.32549	103
chr1	40832990	40833142	PotentialPeaks_FAIRE_peak_621	34	.	2.56567	5.86589	3.47934	55
chr1	40847202	40847725	PotentialPeaks_FAIRE_peak_622	311	.	6.07489	34.2953	31.1371	378
chr1	40854264	40854568	PotentialPeaks_FAIRE_peak_623	146	.	4.3351	17.5236	14.6947	160
chr1	40901557	40901768	PotentialPeaks_FAIRE_peak_624	153	.	4.42358	18.2118	15.3666	104
chr1	40936022	40936220	PotentialPeaks_FAIRE_peak_625	80	.	3.1765	10.6518	8.01923	110
chr1	40937485	40937749	PotentialPeaks_FAIRE_peak_626	82	.	3.28271	10.9043	8.26504	169
chr1	40944497	40944747	PotentialPeaks_FAIRE_peak_627	132	.	3.87507	16.0236	13.2342	151
chr1	41184851	41185003	PotentialPeaks_FAIRE_peak_628	48	.	2.83109	7.31973	4.83219	95
chr1	41190751	41191023	PotentialPeaks_FAIRE_peak_629	23	.	2.26994	4.55519	2.31677	220
chr1	41191779	41191938	PotentialPeaks_FAIRE_peak_630	44	.	2.6915	6.95554	4.49265	36
chr1	41197415	41197643	PotentialPeaks_FAIRE_peak_631	114	.	3.89275	14.2165	11.4723	112
chr1	41209480	41209688	PotentialPeaks_FAIRE_peak_632	243	.	4.83204	27.4342	24.3951	126
chr1	41210331	41210680	PotentialPeaks_FAIRE_peak_633	108	.	3.29071	13.5551	10.8337	98
chr1	41213835	41214045	PotentialPeaks_FAIRE_peak_634	65	.	2.76597	9.09639	6.52532	140
chr1	41214638	41214867	PotentialPeaks_FAIRE_peak_635	64	.	2.83028	9.06448	6.49435	147
chr1	41215185	41215362	PotentialPeaks_FAIRE_peak_636	52	.	2.66373	7.79622	5.29091	66
chr1	41299940	41300156	PotentialPeaks_FAIRE_peak_637	125	.	3.73227	15.3383	12.5666	106
chr1	41301017	41301298	PotentialPeaks_FAIRE_peak_638	47	.	2.68112	7.23513	4.76094	89
chr1	41321143	41321366	PotentialPeaks_FAIRE_peak_639	47	.	2.81299	7.2522	4.77716	91
chr1	41324098	41324250	PotentialPeaks_FAIRE_peak_640	49	.	2.69165	7.43946	4.94759	101
chr1	41327974	41328205	PotentialPeaks_FAIRE_peak_641	59	.	2.81946	8.49281	5.94756	104
chr1	41331550	41331716	PotentialPeaks_FAIRE_peak_642	42	.	2.59239	6.71705	4.27578	99
chr1	41332185	41332380	PotentialPeaks_FAIRE_peak_643	34	.	2.45418	5.87654	3.48946	54
chr1	41436986	41437152	PotentialPeaks_FAIRE_peak_644	52	.	2.90089	7.76025	5.25625	54
chr1	41446923	41447726	PotentialPeaks_FAIRE_peak_645	719	.	7.44541	75.7188	71.9781	248
chr1	41484839	41485029	PotentialPeaks_FAIRE_peak_646	79	.	3.36192	10.5685	7.93804	139
chr1	41495805	41495965	PotentialPeaks_FAIRE_peak_647	48	.	2.83109	7.31973	4.83219	103
chr1	41612528	41612711	PotentialPeaks_FAIRE_peak_648	30	.	2.4772	5.40904	3.06515	65
chr1	41661916	41662106	PotentialPeaks_FAIRE_peak_649	86	.	3.38613	11.3451	8.68952	118
chr1	41662698	41662915	PotentialPeaks_FAIRE_peak_650	124	.	3.82055	15.2355	12.466	150
chr1	41667698	41667962	PotentialPeaks_FAIRE_peak_651	132	.	3.99151	16.0152	13.2261	114
chr1	41708813	41708978	PotentialPeaks_FAIRE_peak_652	58	.	3.00803	8.35443	5.81364	90
chr1	41709568	41709818	PotentialPeaks_FAIRE_peak_653	53	.	2.91956	7.83078	5.31581	116
chr1	41799791	41800435	PotentialPeaks_FAIRE_peak_654	178	.	4.62988	20.722	17.8188	223
chr1	41865744	41865911	PotentialPeaks_FAIRE_peak_655	65	.	3.06737	9.17297	6.59957	93
chr1	41867301	41867564	PotentialPeaks_FAIRE_peak_656	213	.	4.89237	24.3138	21.3354	112
chr1	41867617	41867785	PotentialPeaks_FAIRE_peak_657	45	.	2.67326	7.04355	4.57724	135
chr1	41918767	41918952	PotentialPeaks_FAIRE_peak_658	73	.	3.27345	9.99766	7.38818	115
chr1	41945055	41945441	PotentialPeaks_FAIRE_peak_659	247	.	5.23024	27.7674	24.723	261
chr1	41974242	41974401	PotentialPeaks_FAIRE_peak_660	23	.	2.30026	4.53965	2.30247	146
chr1	42095116	42095369	PotentialPeaks_FAIRE_peak_661	30	.	2.4772	5.40904	3.06515	145
chr1	42164450	42164658	PotentialPeaks_FAIRE_peak_662	146	.	4.3351	17.5236	14.6947	87
chr1	42177108	42177275	PotentialPeaks_FAIRE_peak_663	34	.	2.56567	5.86589	3.47934	38
chr1	42289661	42289813	PotentialPeaks_FAIRE_peak_664	39	.	2.61629	6.35314	3.92832	93
chr1	42290119	42290400	PotentialPeaks_FAIRE_peak_665	164	.	4.52858	19.2995	16.4279	115
chr1	42299388	42299754	PotentialPeaks_FAIRE_peak_666	74	.	3.0973	10.0959	7.48395	129
chr1	42300328	42300497	PotentialPeaks_FAIRE_peak_667	90	.	3.27854	11.7546	9.08402	81
chr1	42300754	42301034	PotentialPeaks_FAIRE_peak_668	155	.	4.14535	18.4424	15.5929	130
chr1	42314821	42315015	PotentialPeaks_FAIRE_peak_669	102	.	3.43955	12.9591	10.2517	116
chr1	42316508	42316741	PotentialPeaks_FAIRE_peak_670	201	.	4.5747	23.0545	20.1024	135
chr1	42318755	42318929	PotentialPeaks_FAIRE_peak_671	72	.	3.03434	9.81605	7.21753	88
chr1	42352786	42352992	PotentialPeaks_FAIRE_peak_672	23	.	2.30026	4.53965	2.30247	33
chr1	42452019	42452172	PotentialPeaks_FAIRE_peak_673	30	.	2.4772	5.40904	3.06515	110
chr1	42473148	42473410	PotentialPeaks_FAIRE_peak_674	70	.	3.19256	9.6771	7.08266	111
chr1	42473461	42473626	PotentialPeaks_FAIRE_peak_675	26	.	2.38873	4.96681	2.67217	129
chr1	42529145	42529983	PotentialPeaks_FAIRE_peak_676	406	.	6.2068	43.9537	40.6469	716
chr1	42546518	42546693	PotentialPeaks_FAIRE_peak_677	52	.	2.64992	7.73367	5.23067	85
chr1	42547792	42547971	PotentialPeaks_FAIRE_peak_678	54	.	2.67625	8.01211	5.49084	120
chr1	42548147	42548349	PotentialPeaks_FAIRE_peak_679	79	.	3.02312	10.5388	7.91438	58
chr1	42548553	42548945	PotentialPeaks_FAIRE_peak_680	120	.	3.52086	14.7722	12.0161	180
chr1	42562145	42562313	PotentialPeaks_FAIRE_peak_681	30	.	2.4772	5.40904	3.06515	81
chr1	42596633	42597343	PotentialPeaks_FAIRE_peak_682	151	.	3.94661	18.0081	15.17	98
chr1	42654507	42654659	PotentialPeaks_FAIRE_peak_683	34	.	2.56567	5.86589	3.47934	44
chr1	42685681	42686056	PotentialPeaks_FAIRE_peak_684	455	.	6.11621	48.925	45.5469	239
chr1	42686717	42687082	PotentialPeaks_FAIRE_peak_685	58	.	2.6202	8.36617	5.82494	246
chr1	42693437	42693589	PotentialPeaks_FAIRE_peak_686	29	.	2.44171	5.28438	2.96965	137
chr1	42714373	42714564	PotentialPeaks_FAIRE_peak_687	48	.	2.83109	7.31973	4.83219	43
chr1	42743023	42743824	PotentialPeaks_FAIRE_peak_688	79	.	2.72747	10.5451	7.92065	499
chr1	42748140	42748329	PotentialPeaks_FAIRE_peak_689	127	.	2.8195	15.5784	12.7981	84
chr1	42748510	42748715	PotentialPeaks_FAIRE_peak_690	100	.	2.6324	12.7406	10.0422	100
chr1	42750751	42750903	PotentialPeaks_FAIRE_peak_691	49	.	2.21064	7.44548	4.95322	91
chr1	42752231	42752760	PotentialPeaks_FAIRE_peak_692	895	.	7.39291	93.5931	89.5842	315
chr1	42761225	42761527	PotentialPeaks_FAIRE_peak_693	233	.	4.7612	26.3611	23.3423	117
chr1	42770252	42770799	PotentialPeaks_FAIRE_peak_694	113	.	3.27821	14.1378	11.3993	111
chr1	42771212	42771364	PotentialPeaks_FAIRE_peak_695	42	.	2.36214	6.65576	4.21744	80
chr1	42771495	42771700	PotentialPeaks_FAIRE_peak_696	173	.	3.87028	20.2905	17.3979	96
chr1	42800895	42801089	PotentialPeaks_FAIRE_peak_697	25	.	2.34515	4.81647	2.55933	20
chr1	42820441	42820600	PotentialPeaks_FAIRE_peak_698	39	.	2.65415	6.3369	3.91272	106
chr1	42836719	42836908	PotentialPeaks_FAIRE_peak_699	98	.	3.43911	12.4942	9.80151	99
chr1	42839084	42839295	PotentialPeaks_FAIRE_peak_700	19	.	2.1031	4.06801	1.94305	67
chr1	42844990	42845181	PotentialPeaks_FAIRE_peak_701	29	.	2.44497	5.29583	2.98038	42
chr1	42907721	42908526	PotentialPeaks_FAIRE_peak_702	1318	.	13.5747	136.478	131.81	327
chr1	42933663	42933891	PotentialPeaks_FAIRE_peak_703	137	.	4.05783	16.5959	13.7915	128
chr1	42934199	42934455	PotentialPeaks_FAIRE_peak_704	322	.	6.04808	35.4261	32.248	120
chr1	42945196	42945857	PotentialPeaks_FAIRE_peak_705	177	.	4.2903	20.6495	17.7476	486
chr1	42946305	42946542	PotentialPeaks_FAIRE_peak_706	123	.	3.63886	15.1304	12.3631	93
chr1	42971967	42972164	PotentialPeaks_FAIRE_peak_707	247	.	5.31031	27.7906	24.7458	103
chr1	42980933	42981096	PotentialPeaks_FAIRE_peak_708	58	.	2.98075	8.43954	5.89595	123
chr1	43009932	43010084	PotentialPeaks_FAIRE_peak_709	52	.	2.73522	7.7874	5.28236	90
chr1	43122741	43123063	PotentialPeaks_FAIRE_peak_710	271	.	5.83912	30.2823	27.1908	190
chr1	43149462	43149692	PotentialPeaks_FAIRE_peak_711	101	.	3.57089	12.8444	10.1435	139
chr1	43155165	43155704	PotentialPeaks_FAIRE_peak_712	543	.	8.29119	57.8069	54.3101	396
chr1	43167484	43167708	PotentialPeaks_FAIRE_peak_713	90	.	3.53886	11.743	9.0727	115
chr1	43169822	43170021	PotentialPeaks_FAIRE_peak_714	67	.	3.15614	9.32548	6.74737	108
chr1	43196463	43196851	PotentialPeaks_FAIRE_peak_715	411	.	6.44486	44.4742	41.1594	177
chr1	43220296	43221014	PotentialPeaks_FAIRE_peak_716	98	.	3.40823	12.5821	9.88733	588
chr1	43230505	43230673	PotentialPeaks_FAIRE_peak_717	40	.	2.60346	6.45743	4.02793	50
chr1	43243092	43243341	PotentialPeaks_FAIRE_peak_718	48	.	2.83109	7.31973	4.83219	140
chr1	43314895	43315216	PotentialPeaks_FAIRE_peak_719	26	.	2.38873	4.96681	2.67217	172
chr1	43321319	43321628	PotentialPeaks_FAIRE_peak_720	388	.	6.68472	42.1727	38.8919	140
chr1	43356404	43356647	PotentialPeaks_FAIRE_peak_721	108	.	3.68859	13.6072	10.8804	114
chr1	43415099	43415369	PotentialPeaks_FAIRE_peak_722	342	.	5.66714	37.432	34.2223	114
chr1	43417621	43418118	PotentialPeaks_FAIRE_peak_723	212	.	4.38359	24.214	21.2374	138
chr1	43418286	43418539	PotentialPeaks_FAIRE_peak_724	180	.	4.03667	21.0066	18.0982	117
chr1	43423268	43423506	PotentialPeaks_FAIRE_peak_725	73	.	3.20294	9.92874	7.32694	103
chr1	43483792	43484303	PotentialPeaks_FAIRE_peak_726	46	.	2.78312	7.14041	4.67012	102
chr1	43502192	43502582	PotentialPeaks_FAIRE_peak_727	102	.	3.3806	12.9054	10.203	106
chr1	43503518	43503809	PotentialPeaks_FAIRE_peak_728	24	.	2.14757	4.64868	2.40374	190
chr1	43509640	43509792	PotentialPeaks_FAIRE_peak_729	34	.	2.56567	5.86589	3.47934	141
chr1	43751655	43752226	PotentialPeaks_FAIRE_peak_730	73	.	3.27345	9.99766	7.38818	288
chr1	43755360	43755553	PotentialPeaks_FAIRE_peak_731	53	.	2.91956	7.83078	5.31581	51
chr1	43786940	43787110	PotentialPeaks_FAIRE_peak_732	23	.	2.30026	4.53965	2.30247	108
chr1	43817140	43817428	PotentialPeaks_FAIRE_peak_733	30	.	2.4772	5.40904	3.06515	27
chr1	43884477	43885062	PotentialPeaks_FAIRE_peak_734	1122	.	10.8234	116.653	112.277	347
chr1	43955882	43956124	PotentialPeaks_FAIRE_peak_735	250	.	5.44371	28.0521	25.001	137
chr1	43990354	43991007	PotentialPeaks_FAIRE_peak_736	1245	.	12.1122	129.08	124.514	445
chr1	44098728	44098949	PotentialPeaks_FAIRE_peak_737	146	.	4.3351	17.5236	14.6947	126
chr1	44159095	44159584	PotentialPeaks_FAIRE_peak_738	994	.	11.5765	103.602	99.4351	185
chr1	44175527	44175936	PotentialPeaks_FAIRE_peak_739	1342	.	11.39	138.904	134.203	210
chr1	44176447	44176964	PotentialPeaks_FAIRE_peak_740	486	.	6.3283	52.1021	48.6816	362
chr1	44204323	44205173	PotentialPeaks_FAIRE_peak_741	739	.	9.72363	77.748	73.9777	411
chr1	44286010	44286177	PotentialPeaks_FAIRE_peak_742	79	.	3.36192	10.5685	7.93804	80
chr1	44608308	44608597	PotentialPeaks_FAIRE_peak_743	254	.	5.29569	28.4658	25.4082	147
chr1	44609251	44609722	PotentialPeaks_FAIRE_peak_744	56	.	2.86488	8.15846	5.63203	124
chr1	44641718	44641883	PotentialPeaks_FAIRE_peak_745	58	.	3.00803	8.35443	5.81364	85
chr1	44798222	44798390	PotentialPeaks_FAIRE_peak_746	133	.	4.15816	16.1735	13.3776	54
chr1	45370892	45371048	PotentialPeaks_FAIRE_peak_747	39	.	2.65415	6.3369	3.91272	31
chr1	45684850	45685028	PotentialPeaks_FAIRE_peak_748	108	.	3.80427	13.5831	10.857	100
chr1	45823063	45823316	PotentialPeaks_FAIRE_peak_749	133	.	4.15816	16.1735	13.3776	124
chr1	45837428	45837782	PotentialPeaks_FAIRE_peak_750	79	.	3.36192	10.5685	7.93804	86
chr1	45851764	45852475	PotentialPeaks_FAIRE_peak_751	729	.	10.1157	76.7347	72.9792	515
chr1	45873810	45873996	PotentialPeaks_FAIRE_peak_752	108	.	3.80427	13.5831	10.857	132
chr1	45882116	45882287	PotentialPeaks_FAIRE_peak_753	160	.	4.51205	18.9085	16.0441	86
chr1	45962002	45962448	PotentialPeaks_FAIRE_peak_754	90	.	3.53886	11.743	9.0727	129
chr1	45982336	45982601	PotentialPeaks_FAIRE_peak_755	210	.	5.13135	24.0106	21.0374	130
chr1	45982781	45983048	PotentialPeaks_FAIRE_peak_756	127	.	4.06969	15.5119	12.733	141
chr1	46075322	46075474	PotentialPeaks_FAIRE_peak_757	58	.	3.00803	8.35443	5.81364	42
chr1	46123575	46123727	PotentialPeaks_FAIRE_peak_758	84	.	3.45039	11.1503	8.49965	77
chr1	46884267	46884419	PotentialPeaks_FAIRE_peak_759	39	.	2.65415	6.3369	3.91272	92
chr1	46910250	46910924	PotentialPeaks_FAIRE_peak_760	574	.	7.01846	60.9428	57.4055	403
chr1	47220756	47220915	PotentialPeaks_FAIRE_peak_761	43	.	2.74262	6.82164	4.36435	105
chr1	47220973	47221141	PotentialPeaks_FAIRE_peak_762	58	.	3.00803	8.35443	5.81364	64
chr1	47334720	47334936	PotentialPeaks_FAIRE_peak_763	39	.	2.65415	6.3369	3.91272	116
chr1	47527111	47527277	PotentialPeaks_FAIRE_peak_764	26	.	2.38873	4.96681	2.67217	122
chr1	47602577	47602765	PotentialPeaks_FAIRE_peak_765	34	.	2.56567	5.86589	3.47934	106
chr1	48938263	48938570	PotentialPeaks_FAIRE_peak_766	1578	.	16.7211	162.707	157.803	156
chr1	50983965	50984883	PotentialPeaks_FAIRE_peak_767	830	.	10.0705	86.9141	83.0073	349
chr1	51171468	51171620	PotentialPeaks_FAIRE_peak_768	53	.	2.91956	7.83078	5.31581	51
chr1	51302372	51302545	PotentialPeaks_FAIRE_peak_769	39	.	2.65415	6.3369	3.91272	67
chr1	51357869	51358032	PotentialPeaks_FAIRE_peak_770	53	.	2.91956	7.83078	5.31581	40
chr1	51390829	51391083	PotentialPeaks_FAIRE_peak_771	380	.	6.51079	41.2728	38.0053	113
chr1	51515940	51516148	PotentialPeaks_FAIRE_peak_772	73	.	3.27345	9.99766	7.38818	68
chr1	51535004	51535763	PotentialPeaks_FAIRE_peak_773	1136	.	11.5467	118.087	113.688	318
chr1	51566017	51566169	PotentialPeaks_FAIRE_peak_774	26	.	2.38873	4.96681	2.67217	89
chr1	51586995	51587288	PotentialPeaks_FAIRE_peak_775	43	.	2.74262	6.82164	4.36435	88
chr1	51610653	51610805	PotentialPeaks_FAIRE_peak_776	34	.	2.56567	5.86589	3.47934	72
chr1	51653894	51654325	PotentialPeaks_FAIRE_peak_777	368	.	6.73673	40.1408	36.89	117
chr1	51656746	51656898	PotentialPeaks_FAIRE_peak_778	38	.	2.6266	6.23696	3.83182	135
chr1	51664481	51664716	PotentialPeaks_FAIRE_peak_779	84	.	3.45039	11.1503	8.49965	144
chr1	51672447	51672632	PotentialPeaks_FAIRE_peak_780	121	.	3.74918	14.9039	12.1413	92
chr1	51674311	51674575	PotentialPeaks_FAIRE_peak_781	122	.	3.76677	14.986	12.2217	149
chr1	51701318	51701585	PotentialPeaks_FAIRE_peak_782	293	.	5.79307	32.501	29.3726	118
chr1	51704698	51704892	PotentialPeaks_FAIRE_peak_783	37	.	2.57321	6.19143	3.78851	109
chr1	51707206	51707806	PotentialPeaks_FAIRE_peak_784	114	.	3.89275	14.2165	11.4723	91
chr1	51754062	51754750	PotentialPeaks_FAIRE_peak_785	568	.	8.06341	60.3327	56.8029	498
chr1	51861603	51861763	PotentialPeaks_FAIRE_peak_786	48	.	2.83109	7.31973	4.83219	59
chr1	51871599	51871766	PotentialPeaks_FAIRE_peak_787	63	.	3.0965	8.89034	6.32549	75
chr1	51933241	51933411	PotentialPeaks_FAIRE_peak_788	30	.	2.46136	5.35348	3.0342	78
chr1	51971850	51972184	PotentialPeaks_FAIRE_peak_789	359	.	6.11994	39.1837	35.9472	140
chr1	52001732	52001925	PotentialPeaks_FAIRE_peak_790	84	.	3.45039	11.1503	8.49965	108
chr1	52055530	52055698	PotentialPeaks_FAIRE_peak_791	79	.	3.36192	10.5685	7.93804	49
chr1	52061018	52061211	PotentialPeaks_FAIRE_peak_792	114	.	3.89275	14.2165	11.4723	116
chr1	52136548	52136834	PotentialPeaks_FAIRE_peak_793	84	.	3.45039	11.1503	8.49965	200
chr1	52138149	52138301	PotentialPeaks_FAIRE_peak_794	48	.	2.83109	7.31973	4.83219	63
chr1	52170470	52170939	PotentialPeaks_FAIRE_peak_795	1170	.	11.3494	121.461	117.008	212
chr1	52175957	52176441	PotentialPeaks_FAIRE_peak_796	455	.	7.08478	48.96	45.5815	294
chr1	52190364	52190544	PotentialPeaks_FAIRE_peak_797	51	.	2.82581	7.64909	5.14928	113
chr1	52203498	52203760	PotentialPeaks_FAIRE_peak_798	227	.	4.84369	25.7878	22.7805	111
chr1	52289266	52289450	PotentialPeaks_FAIRE_peak_799	87	.	3.15168	11.3621	8.7061	82
chr1	52289915	52290616	PotentialPeaks_FAIRE_peak_800	1456	.	14.0824	150.511	145.688	268
chr1	52315631	52315783	PotentialPeaks_FAIRE_peak_801	39	.	2.65415	6.3369	3.91272	75
chr1	52359534	52359772	PotentialPeaks_FAIRE_peak_802	153	.	4.42358	18.2118	15.3666	92
chr1	52444988	52445157	PotentialPeaks_FAIRE_peak_803	53	.	2.91956	7.83078	5.31581	57
chr1	52485217	52485374	PotentialPeaks_FAIRE_peak_804	30	.	2.4772	5.40904	3.06515	120
chr1	52513552	52513716	PotentialPeaks_FAIRE_peak_805	34	.	2.56567	5.86589	3.47934	126
chr1	52527781	52527972	PotentialPeaks_FAIRE_peak_806	30	.	2.4772	5.40904	3.06515	94
chr1	52570846	52571019	PotentialPeaks_FAIRE_peak_807	43	.	2.74262	6.82164	4.36435	100
chr1	52587739	52588008	PotentialPeaks_FAIRE_peak_808	68	.	3.18497	9.43818	6.85064	79
chr1	52687298	52687739	PotentialPeaks_FAIRE_peak_809	742	.	9.33537	77.9771	74.2035	210
chr1	52687887	52688112	PotentialPeaks_FAIRE_peak_810	228	.	4.91786	25.8282	22.8203	129
chr1	52705093	52705247	PotentialPeaks_FAIRE_peak_811	92	.	3.51917	11.9019	9.22786	91
chr1	52775083	52775235	PotentialPeaks_FAIRE_peak_812	39	.	2.65415	6.3369	3.91272	106
chr1	52784083	52784305	PotentialPeaks_FAIRE_peak_813	90	.	3.41281	11.6869	9.02269	147
chr1	52805206	52805388	PotentialPeaks_FAIRE_peak_814	79	.	3.36192	10.5685	7.93804	79
chr1	52873849	52874041	PotentialPeaks_FAIRE_peak_815	79	.	3.36192	10.5685	7.93804	94
chr1	52874347	52874639	PotentialPeaks_FAIRE_peak_816	53	.	2.91956	7.83078	5.31581	193
chr1	52901556	52902200	PotentialPeaks_FAIRE_peak_817	1054	.	10.9394	109.698	105.435	153
chr1	53024549	53024759	PotentialPeaks_FAIRE_peak_818	90	.	3.53886	11.743	9.0727	103
chr1	53028834	53029058	PotentialPeaks_FAIRE_peak_819	73	.	3.27345	9.99766	7.38818	88
chr1	53089563	53089721	PotentialPeaks_FAIRE_peak_820	39	.	2.65415	6.3369	3.91272	121
chr1	53109985	53110285	PotentialPeaks_FAIRE_peak_821	108	.	3.80427	13.5831	10.857	52
chr1	53117469	53117693	PotentialPeaks_FAIRE_peak_822	34	.	2.56567	5.86589	3.47934	140
chr1	53118801	53118983	PotentialPeaks_FAIRE_peak_823	30	.	2.4772	5.40904	3.06515	132
chr1	53119563	53119836	PotentialPeaks_FAIRE_peak_824	26	.	2.38873	4.96681	2.67217	162
chr1	53251434	53251586	PotentialPeaks_FAIRE_peak_825	26	.	2.38873	4.96681	2.67217	63
chr1	53263389	53263541	PotentialPeaks_FAIRE_peak_826	23	.	2.30026	4.53965	2.30247	42
chr1	53329591	53329791	PotentialPeaks_FAIRE_peak_827	90	.	3.53886	11.743	9.0727	104
chr1	53353657	53354117	PotentialPeaks_FAIRE_peak_828	1005	.	11.7905	104.766	100.58	238
chr1	53370259	53370783	PotentialPeaks_FAIRE_peak_829	329	.	6.45842	36.1133	32.9239	230
chr1	53409421	53409778	PotentialPeaks_FAIRE_peak_830	1052	.	12.8284	109.468	105.209	174
chr1	53763607	53763766	PotentialPeaks_FAIRE_peak_831	79	.	3.36192	10.5685	7.93804	62
chr1	53841957	53842251	PotentialPeaks_FAIRE_peak_832	505	.	8.05779	53.9857	50.5398	149
chr1	53880593	53880999	PotentialPeaks_FAIRE_peak_833	270	.	5.63021	30.1071	27.0202	262
chr1	53906562	53906714	PotentialPeaks_FAIRE_peak_834	48	.	2.83109	7.31973	4.83219	89
chr1	53947346	53947524	PotentialPeaks_FAIRE_peak_835	63	.	3.0965	8.89034	6.32549	88
chr1	53966053	53966255	PotentialPeaks_FAIRE_peak_836	114	.	3.89275	14.2165	11.4723	77
chr1	53997137	53997325	PotentialPeaks_FAIRE_peak_837	58	.	3.00803	8.35443	5.81364	115
chr1	54096040	54096192	PotentialPeaks_FAIRE_peak_838	79	.	3.36192	10.5685	7.93804	89
chr1	54147360	54147514	PotentialPeaks_FAIRE_peak_839	48	.	2.83109	7.31973	4.83219	80
chr1	54217541	54217703	PotentialPeaks_FAIRE_peak_840	34	.	2.56567	5.86589	3.47934	104
chr1	54250924	54251314	PotentialPeaks_FAIRE_peak_841	96	.	3.62733	12.3462	9.65687	149
chr1	54251966	54252130	PotentialPeaks_FAIRE_peak_842	39	.	2.65415	6.3369	3.91272	66
chr1	54307061	54307912	PotentialPeaks_FAIRE_peak_843	1206	.	13.921	125.115	120.607	475
chr1	54495547	54495917	PotentialPeaks_FAIRE_peak_844	181	.	4.77746	21.048	18.1362	264
chr1	54591298	54591450	PotentialPeaks_FAIRE_peak_845	30	.	2.4772	5.40904	3.06515	102
chr1	54614383	54615073	PotentialPeaks_FAIRE_peak_846	488	.	7.52995	52.3226	48.8994	206
chr1	54722851	54723115	PotentialPeaks_FAIRE_peak_847	217	.	5.21982	24.77	21.7817	147
chr1	54791753	54791917	PotentialPeaks_FAIRE_peak_848	34	.	2.56567	5.86589	3.47934	94
chr1	54801943	54802095	PotentialPeaks_FAIRE_peak_849	34	.	2.52215	5.85441	3.47934	50
chr1	54804638	54804819	PotentialPeaks_FAIRE_peak_850	34	.	2.56567	5.86589	3.47934	122
chr1	54862537	54862689	PotentialPeaks_FAIRE_peak_851	34	.	2.56567	5.86589	3.47934	54
chr1	54880419	54880571	PotentialPeaks_FAIRE_peak_852	30	.	2.43808	5.40708	3.06515	96
chr1	54982776	54983382	PotentialPeaks_FAIRE_peak_853	163	.	4.18538	19.224	16.3537	487
chr1	54983476	54983650	PotentialPeaks_FAIRE_peak_854	59	.	2.82257	8.50657	5.96091	137
chr1	55084139	55084566	PotentialPeaks_FAIRE_peak_855	1060	.	11.1489	110.351	106.077	215
chr1	55109366	55109762	PotentialPeaks_FAIRE_peak_856	1354	.	13.214	140.148	135.434	242
chr1	55144650	55145263	PotentialPeaks_FAIRE_peak_857	1174	.	10.5822	121.954	117.493	450
chr1	55145345	55145498	PotentialPeaks_FAIRE_peak_858	49	.	2.46436	7.43097	4.93929	123
chr1	55187751	55188259	PotentialPeaks_FAIRE_peak_859	513	.	7.71907	54.8424	51.385	201
chr1	55188386	55188774	PotentialPeaks_FAIRE_peak_860	42	.	2.58638	6.6926	4.25251	317
chr1	55218225	55218385	PotentialPeaks_FAIRE_peak_861	66	.	3.12686	9.21051	6.63588	102
chr1	55269893	55270047	PotentialPeaks_FAIRE_peak_862	66	.	3.12686	9.21051	6.63588	60
chr1	55275001	55275191	PotentialPeaks_FAIRE_peak_863	39	.	2.65415	6.3369	3.91272	67
chr1	55283306	55283506	PotentialPeaks_FAIRE_peak_864	23	.	2.30026	4.53965	2.30247	60
chr1	55293784	55294199	PotentialPeaks_FAIRE_peak_865	829	.	9.18196	86.9008	82.9942	186
chr1	55440037	55440340	PotentialPeaks_FAIRE_peak_866	372	.	6.90078	40.4566	37.2002	164
chr1	55462472	55462878	PotentialPeaks_FAIRE_peak_867	856	.	9.90678	89.6188	85.671	191
chr1	55573765	55573963	PotentialPeaks_FAIRE_peak_868	58	.	3.00803	8.35443	5.81364	89
chr1	55633322	55633545	PotentialPeaks_FAIRE_peak_869	48	.	2.83109	7.31973	4.83219	107
chr1	55666572	55666724	PotentialPeaks_FAIRE_peak_870	30	.	2.4772	5.40904	3.06515	109
chr1	55722761	55722965	PotentialPeaks_FAIRE_peak_871	90	.	3.53886	11.743	9.0727	73
chr1	55723241	55723497	PotentialPeaks_FAIRE_peak_872	120	.	3.98122	14.8595	12.0979	126
chr1	55761591	55761964	PotentialPeaks_FAIRE_peak_873	225	.	4.87354	25.5999	22.5956	246
chr1	55762874	55763124	PotentialPeaks_FAIRE_peak_874	95	.	3.37226	12.1885	9.5076	148
chr1	55793287	55793534	PotentialPeaks_FAIRE_peak_875	437	.	6.82879	47.0863	43.7341	139
chr1	55895112	55895321	PotentialPeaks_FAIRE_peak_876	263	.	5.75065	29.4746	26.3973	92
chr1	55917046	55917214	PotentialPeaks_FAIRE_peak_877	53	.	2.91956	7.83078	5.31581	124
chr1	55931055	55931338	PotentialPeaks_FAIRE_peak_878	451	.	7.56325	48.4783	45.1068	138
chr1	55931692	55931883	PotentialPeaks_FAIRE_peak_879	61	.	3.04	8.67131	6.12025	135
chr1	55943336	55943488	PotentialPeaks_FAIRE_peak_880	90	.	3.41281	11.6869	9.02269	84
chr1	55947711	55947924	PotentialPeaks_FAIRE_peak_881	127	.	4.06969	15.5119	12.733	111
chr1	56017195	56017456	PotentialPeaks_FAIRE_peak_882	280	.	5.84433	31.1221	28.016	146
chr1	56698950	56699102	PotentialPeaks_FAIRE_peak_883	30	.	2.4772	5.40904	3.06515	33
chr1	56890137	56890515	PotentialPeaks_FAIRE_peak_884	369	.	6.47836	40.2125	36.9606	150
chr1	57028465	57028668	PotentialPeaks_FAIRE_peak_885	58	.	2.7608	8.40011	5.85778	101
chr1	57029872	57030092	PotentialPeaks_FAIRE_peak_886	68	.	2.77205	9.46374	6.87534	108
chr1	57030215	57030461	PotentialPeaks_FAIRE_peak_887	292	.	4.97059	32.4197	29.2925	125
chr1	57034064	57034237	PotentialPeaks_FAIRE_peak_888	127	.	3.44139	15.5139	12.7349	73
chr1	57038088	57038262	PotentialPeaks_FAIRE_peak_889	73	.	2.98041	9.95248	7.34995	59
chr1	57140020	57140336	PotentialPeaks_FAIRE_peak_890	184	.	4.56026	21.37	18.4525	119
chr1	57145537	57145700	PotentialPeaks_FAIRE_peak_891	37	.	2.61612	6.19882	3.79566	78
chr1	57157557	57157750	PotentialPeaks_FAIRE_peak_892	71	.	3.10739	9.73792	7.14171	69
chr1	57262517	57262742	PotentialPeaks_FAIRE_peak_893	326	.	5.7294	35.7933	32.6101	97
chr1	57275780	57275952	PotentialPeaks_FAIRE_peak_894	42	.	2.58938	6.70481	4.26416	134
chr1	57300896	57301215	PotentialPeaks_FAIRE_peak_895	102	.	3.7158	12.9596	10.2517	170
chr1	57310479	57310631	PotentialPeaks_FAIRE_peak_896	30	.	2.4772	5.40904	3.06515	83
chr1	57316613	57316807	PotentialPeaks_FAIRE_peak_897	120	.	3.98122	14.8595	12.0979	76
chr1	57326629	57326866	PotentialPeaks_FAIRE_peak_898	173	.	4.52526	20.2431	17.3514	120
chr1	57383551	57383709	PotentialPeaks_FAIRE_peak_899	71	.	3.22226	9.79526	7.19743	88
chr1	57434244	57434618	PotentialPeaks_FAIRE_peak_900	833	.	10.4726	87.264	83.3517	195
chr1	57463101	57463700	PotentialPeaks_FAIRE_peak_901	263	.	5.75065	29.4746	26.3973	220
chr1	57463769	57464173	PotentialPeaks_FAIRE_peak_902	73	.	3.27345	9.99766	7.38818	142
chr1	57480628	57480871	PotentialPeaks_FAIRE_peak_903	127	.	4.06969	15.5119	12.733	110
chr1	57485846	57486099	PotentialPeaks_FAIRE_peak_904	388	.	6.33391	42.0875	38.8078	138
chr1	57486679	57486890	PotentialPeaks_FAIRE_peak_905	157	.	4.06691	18.6262	15.7733	124
chr1	57663156	57663308	PotentialPeaks_FAIRE_peak_906	48	.	2.83109	7.31973	4.83219	98
chr1	57669909	57670197	PotentialPeaks_FAIRE_peak_907	56	.	2.91262	8.17046	5.64363	83
chr1	57773883	57774058	PotentialPeaks_FAIRE_peak_908	30	.	2.4772	5.40904	3.06515	82
chr1	57813618	57813770	PotentialPeaks_FAIRE_peak_909	43	.	2.74262	6.82164	4.36435	130
chr1	57831084	57831372	PotentialPeaks_FAIRE_peak_910	49	.	2.69165	7.43946	4.94759	147
chr1	57831721	57831873	PotentialPeaks_FAIRE_peak_911	38	.	2.49096	6.3022	3.89365	118
chr1	57906837	57907158	PotentialPeaks_FAIRE_peak_912	128	.	3.73456	15.6063	12.8254	124
chr1	57918988	57919252	PotentialPeaks_FAIRE_peak_913	160	.	4.51205	18.9085	16.0441	141
chr1	58003736	58003918	PotentialPeaks_FAIRE_peak_914	159	.	0.23253	18.7849	15.9259	46
chr1	58006130	58006328	PotentialPeaks_FAIRE_peak_915	188	.	4.56765	21.7281	18.8041	96
chr1	58026214	58026473	PotentialPeaks_FAIRE_peak_916	49	.	2.73222	7.44437	4.95212	186
chr1	58026537	58026723	PotentialPeaks_FAIRE_peak_917	33	.	2.45505	5.74291	3.38031	104
chr1	58026844	58027169	PotentialPeaks_FAIRE_peak_918	670	.	9.17235	70.712	67.043	149
chr1	58052533	58053009	PotentialPeaks_FAIRE_peak_919	1363	.	14.2692	141.117	136.391	231
chr1	58088137	58088375	PotentialPeaks_FAIRE_peak_920	226	.	5.10024	25.6726	22.6672	115
chr1	58169724	58169896	PotentialPeaks_FAIRE_peak_921	70	.	3.13836	9.66432	7.07022	62
chr1	58204950	58205134	PotentialPeaks_FAIRE_peak_922	56	.	2.97285	8.21975	5.69118	121
chr1	58213699	58213922	PotentialPeaks_FAIRE_peak_923	160	.	4.51205	18.9085	16.0441	101
chr1	58245403	58245604	PotentialPeaks_FAIRE_peak_924	30	.	2.4772	5.40904	3.06515	88
chr1	58353206	58353469	PotentialPeaks_FAIRE_peak_925	382	.	6.73829	41.5271	38.255	158
chr1	58393412	58393600	PotentialPeaks_FAIRE_peak_926	23	.	2.30026	4.53965	2.30247	47
chr1	58402045	58402220	PotentialPeaks_FAIRE_peak_927	43	.	2.74262	6.82164	4.36435	85
chr1	58449814	58450065	PotentialPeaks_FAIRE_peak_928	470	.	7.87396	50.4855	47.086	143
chr1	58450561	58450720	PotentialPeaks_FAIRE_peak_929	48	.	2.83109	7.31973	4.83219	125
chr1	58480129	58480281	PotentialPeaks_FAIRE_peak_930	71	.	3.05343	9.70501	7.10978	76
chr1	58480757	58481057	PotentialPeaks_FAIRE_peak_931	766	.	9.561	80.4274	76.6179	158
chr1	58501963	58502614	PotentialPeaks_FAIRE_peak_932	297	.	5.48196	32.8566	29.721	500
chr1	58561694	58562095	PotentialPeaks_FAIRE_peak_933	934	.	11.0729	97.5459	93.4745	189
chr1	58642347	58642499	PotentialPeaks_FAIRE_peak_934	53	.	2.88434	7.87776	5.3612	46
chr1	58643039	58643601	PotentialPeaks_FAIRE_peak_935	598	.	8.8686	63.4559	59.8852	164
chr1	58670701	58670968	PotentialPeaks_FAIRE_peak_936	1159	.	12.7504	120.357	115.923	149
chr1	58768159	58768324	PotentialPeaks_FAIRE_peak_937	73	.	3.27345	9.99766	7.38818	117
chr1	58768489	58768739	PotentialPeaks_FAIRE_peak_938	102	.	3.7158	12.9596	10.2517	124
chr1	58770385	58770537	PotentialPeaks_FAIRE_peak_939	53	.	2.91956	7.83078	5.31581	109
chr1	58770781	58770937	PotentialPeaks_FAIRE_peak_940	30	.	2.4772	5.40904	3.06515	66
chr1	58803852	58804093	PotentialPeaks_FAIRE_peak_941	167	.	4.60052	19.6135	16.7331	91
chr1	58827014	58827265	PotentialPeaks_FAIRE_peak_942	79	.	3.36192	10.5685	7.93804	99
chr1	58852271	58852517	PotentialPeaks_FAIRE_peak_943	43	.	2.74262	6.82164	4.36435	184
chr1	59008236	59008406	PotentialPeaks_FAIRE_peak_944	46	.	2.68291	7.08228	4.61433	70
chr1	59011085	59011237	PotentialPeaks_FAIRE_peak_945	31	.	2.41972	5.47394	3.12648	48
chr1	59030113	59030536	PotentialPeaks_FAIRE_peak_946	675	.	8.11535	71.2001	67.5249	238
chr1	59124924	59125148	PotentialPeaks_FAIRE_peak_947	114	.	3.89275	14.2165	11.4723	122
chr1	59176530	59177110	PotentialPeaks_FAIRE_peak_948	376	.	6.12537	40.9132	37.6506	413
chr1	59177182	59177334	PotentialPeaks_FAIRE_peak_949	34	.	2.3616	5.76486	3.40106	6
chr1	59252922	59253230	PotentialPeaks_FAIRE_peak_950	43	.	2.74262	6.82164	4.36435	194
chr1	59293979	59294400	PotentialPeaks_FAIRE_peak_951	825	.	9.20815	86.4921	82.5924	270
chr1	59294836	59295086	PotentialPeaks_FAIRE_peak_952	140	.	3.77371	16.8395	14.0302	122
chr1	59304444	59304810	PotentialPeaks_FAIRE_peak_953	379	.	6.76641	41.206	37.9394	231
chr1	59327110	59327372	PotentialPeaks_FAIRE_peak_954	47	.	2.81676	7.26631	4.79059	218
chr1	59348911	59349154	PotentialPeaks_FAIRE_peak_955	29	.	2.44171	5.28438	2.96965	39
chr1	59366112	59366325	PotentialPeaks_FAIRE_peak_956	45	.	2.61688	6.96988	4.50636	68
chr1	59371909	59372249	PotentialPeaks_FAIRE_peak_957	350	.	5.48383	38.2633	35.0407	198
chr1	59373628	59373824	PotentialPeaks_FAIRE_peak_958	82	.	2.95012	10.9263	8.28649	54
chr1	59379036	59379205	PotentialPeaks_FAIRE_peak_959	26	.	2.19892	4.96716	2.67249	26
chr1	59383741	59384246	PotentialPeaks_FAIRE_peak_960	67	.	2.77037	9.28669	6.70969	127
chr1	59397699	59398012	PotentialPeaks_FAIRE_peak_961	41	.	2.56849	6.6198	4.18317	189
chr1	59398134	59398406	PotentialPeaks_FAIRE_peak_962	78	.	3.18165	10.4666	7.84424	120
chr1	59399367	59399595	PotentialPeaks_FAIRE_peak_963	26	.	2.38626	4.9583	2.67217	180
chr1	59433008	59433331	PotentialPeaks_FAIRE_peak_964	52	.	2.76743	7.75626	5.25248	241
chr1	59433592	59433751	PotentialPeaks_FAIRE_peak_965	71	.	3.05343	9.70501	7.10978	45
chr1	59434510	59434707	PotentialPeaks_FAIRE_peak_966	29	.	2.33916	5.29616	2.98063	177
chr1	59451518	59451670	PotentialPeaks_FAIRE_peak_967	80	.	3.09556	10.6885	8.05499	50
chr1	59458856	59459034	PotentialPeaks_FAIRE_peak_968	37	.	2.56347	6.15474	3.75372	78
chr1	59471701	59471933	PotentialPeaks_FAIRE_peak_969	35	.	2.39717	5.9135	3.52455	107
chr1	59479603	59479822	PotentialPeaks_FAIRE_peak_970	39	.	2.43849	6.3556	3.9307	82
chr1	59480112	59480270	PotentialPeaks_FAIRE_peak_971	71	.	2.93693	9.74753	7.15107	67
chr1	59494722	59494999	PotentialPeaks_FAIRE_peak_972	43	.	2.53818	6.78698	4.34267	139
chr1	59495258	59495423	PotentialPeaks_FAIRE_peak_973	28	.	2.2807	5.1871	2.87861	106
chr1	59522349	59522599	PotentialPeaks_FAIRE_peak_974	47	.	2.59473	7.18024	4.70835	118
chr1	59532491	59532705	PotentialPeaks_FAIRE_peak_975	34	.	2.44845	5.85401	3.47934	164
chr1	59538289	59539058	PotentialPeaks_FAIRE_peak_976	846	.	7.38975	88.6235	84.6907	598
chr1	59540687	59540905	PotentialPeaks_FAIRE_peak_977	146	.	3.14736	17.4719	14.6472	113
chr1	59541816	59542198	PotentialPeaks_FAIRE_peak_978	80	.	2.56111	10.7099	8.07585	87
chr1	59573027	59573473	PotentialPeaks_FAIRE_peak_979	282	.	5.27888	31.3583	28.2487	250
chr1	59581014	59581380	PotentialPeaks_FAIRE_peak_980	72	.	2.94922	9.80561	7.20744	254
chr1	59590357	59590509	PotentialPeaks_FAIRE_peak_981	29	.	2.40112	5.27272	2.95892	19
chr1	59631498	59631776	PotentialPeaks_FAIRE_peak_982	25	.	2.27467	4.8084	2.55182	131
chr1	59637147	59637299	PotentialPeaks_FAIRE_peak_983	24	.	2.14977	4.65764	2.41221	137
chr1	59641564	59641795	PotentialPeaks_FAIRE_peak_984	325	.	5.71091	35.6906	32.5088	101
chr1	59665161	59665313	PotentialPeaks_FAIRE_peak_985	22	.	2.27032	4.43855	2.24244	68
chr1	59670755	59670928	PotentialPeaks_FAIRE_peak_986	50	.	2.85494	7.5858	5.08835	76
chr1	59680248	59680527	PotentialPeaks_FAIRE_peak_987	618	.	9.03915	65.4424	61.8456	135
chr1	59690825	59691013	PotentialPeaks_FAIRE_peak_988	48	.	2.83109	7.31973	4.83219	87
chr1	59727523	59728108	PotentialPeaks_FAIRE_peak_989	733	.	9.60584	77.1176	73.3568	180
chr1	59741635	59741977	PotentialPeaks_FAIRE_peak_990	785	.	10.6366	82.4371	78.5975	132
chr1	59742424	59742657	PotentialPeaks_FAIRE_peak_991	49	.	2.8251	7.47189	4.97867	98
chr1	59776836	59777034	PotentialPeaks_FAIRE_peak_992	167	.	4.60052	19.6135	16.7331	78
chr1	59782547	59782709	PotentialPeaks_FAIRE_peak_993	34	.	2.56567	5.86589	3.47934	70
chr1	59787593	59787889	PotentialPeaks_FAIRE_peak_994	112	.	3.76391	13.9348	11.2009	101
chr1	59796127	59796290	PotentialPeaks_FAIRE_peak_995	30	.	2.4772	5.40904	3.06515	98
chr1	59819429	59819801	PotentialPeaks_FAIRE_peak_996	89	.	3.1985	11.5885	8.92681	104
chr1	59820067	59820438	PotentialPeaks_FAIRE_peak_997	100	.	3.3088	12.7742	10.0749	303
chr1	59820614	59820768	PotentialPeaks_FAIRE_peak_998	57	.	2.7406	8.30785	5.77613	100
chr1	59832678	59832950	PotentialPeaks_FAIRE_peak_999	48	.	2.83109	7.31973	4.83219	70
chr1	59845968	59846158	PotentialPeaks_FAIRE_peak_1000	53	.	2.91956	7.83078	5.31581	112
chr1	59890666	59890853	PotentialPeaks_FAIRE_peak_1001	63	.	3.0965	8.89034	6.32549	82
chr1	59940695	59940856	PotentialPeaks_FAIRE_peak_1002	163	.	4.36624	19.194	16.3244	80
chr1	59950211	59950374	PotentialPeaks_FAIRE_peak_1003	63	.	3.0965	8.89034	6.32549	52
chr1	59969384	59969985	PotentialPeaks_FAIRE_peak_1004	1225	.	11.8074	127.122	122.584	361
chr1	59997496	59997648	PotentialPeaks_FAIRE_peak_1005	39	.	2.65415	6.3369	3.91272	67
chr1	60099485	60099666	PotentialPeaks_FAIRE_peak_1006	43	.	2.74262	6.82164	4.36435	99
chr1	60154414	60155373	PotentialPeaks_FAIRE_peak_1007	1035	.	10.1718	107.815	103.581	628
chr1	60237003	60237506	PotentialPeaks_FAIRE_peak_1008	1125	.	10.5022	116.966	112.586	297
chr1	60237660	60237824	PotentialPeaks_FAIRE_peak_1009	72	.	2.80395	9.79936	7.20138	73
chr1	60399924	60400587	PotentialPeaks_FAIRE_peak_1010	496	.	6.8272	53.1167	49.6827	188
chr1	60408505	60408673	PotentialPeaks_FAIRE_peak_1011	39	.	2.65415	6.3369	3.91272	72
chr1	60465986	60466711	PotentialPeaks_FAIRE_peak_1012	516	.	7.15782	55.1394	51.6782	372
chr1	60485858	60486061	PotentialPeaks_FAIRE_peak_1013	146	.	4.3351	17.5236	14.6947	94
chr1	60622164	60622403	PotentialPeaks_FAIRE_peak_1014	115	.	3.62231	14.3053	11.5592	109
chr1	60623526	60624190	PotentialPeaks_FAIRE_peak_1015	224	.	4.78041	25.4536	22.454	139
chr1	60684766	60684952	PotentialPeaks_FAIRE_peak_1016	108	.	3.80427	13.5831	10.857	64
chr1	60816457	60816704	PotentialPeaks_FAIRE_peak_1017	26	.	2.38873	4.96681	2.67217	110
chr1	60873534	60873686	PotentialPeaks_FAIRE_peak_1018	30	.	2.4772	5.40904	3.06515	78
chr1	60907949	60908467	PotentialPeaks_FAIRE_peak_1019	607	.	7.37229	64.3027	60.7209	220
chr1	60914651	60914979	PotentialPeaks_FAIRE_peak_1020	60	.	2.7374	8.62396	6.07451	273
chr1	60917502	60917737	PotentialPeaks_FAIRE_peak_1021	343	.	5.69003	37.567	34.3554	129
chr1	60925208	60925543	PotentialPeaks_FAIRE_peak_1022	144	.	4.2844	17.3058	14.4843	219
chr1	60993199	60993379	PotentialPeaks_FAIRE_peak_1023	48	.	2.82816	7.30882	4.83146	110
chr1	61011784	61011949	PotentialPeaks_FAIRE_peak_1024	68	.	3.18497	9.43818	6.85064	82
chr1	61018001	61018231	PotentialPeaks_FAIRE_peak_1025	195	.	4.9544	22.5141	19.5711	88
chr1	61112056	61112318	PotentialPeaks_FAIRE_peak_1026	442	.	7.37938	47.5747	44.2161	141
chr1	61116792	61116944	PotentialPeaks_FAIRE_peak_1027	34	.	2.56567	5.86589	3.47934	49
chr1	61138836	61139008	PotentialPeaks_FAIRE_peak_1028	34	.	2.56567	5.86589	3.47934	81
chr1	61156609	61156840	PotentialPeaks_FAIRE_peak_1029	49	.	2.82142	7.45778	4.96504	127
chr1	61157927	61158085	PotentialPeaks_FAIRE_peak_1030	34	.	2.53905	5.77081	3.40663	88
chr1	61196088	61196584	PotentialPeaks_FAIRE_peak_1031	273	.	4.93776	30.4665	27.3723	207
chr1	61236580	61236733	PotentialPeaks_FAIRE_peak_1032	25	.	2.12917	4.77848	2.52412	65
chr1	61237984	61238309	PotentialPeaks_FAIRE_peak_1033	793	.	8.62859	83.2384	79.3869	150
chr1	61259025	61259278	PotentialPeaks_FAIRE_peak_1034	49	.	2.77652	7.45492	4.96237	137
chr1	61290876	61291123	PotentialPeaks_FAIRE_peak_1035	41	.	2.67133	6.55832	4.12429	105
chr1	61320235	61320627	PotentialPeaks_FAIRE_peak_1036	35	.	2.55825	5.98725	3.59456	224
chr1	61354943	61355236	PotentialPeaks_FAIRE_peak_1037	100	.	3.21218	12.7082	10.0105	99
chr1	61363247	61363475	PotentialPeaks_FAIRE_peak_1038	76	.	3.12612	10.2231	7.60752	120
chr1	61366378	61366530	PotentialPeaks_FAIRE_peak_1039	40	.	2.5277	6.45312	4.02388	86
chr1	61369232	61369384	PotentialPeaks_FAIRE_peak_1040	33	.	2.47143	5.66664	3.30825	45
chr1	61376114	61376266	PotentialPeaks_FAIRE_peak_1041	36	.	2.58177	6.07343	3.67642	99
chr1	61376627	61376866	PotentialPeaks_FAIRE_peak_1042	42	.	2.69615	6.6503	4.21212	146
chr1	61433937	61434238	PotentialPeaks_FAIRE_peak_1043	350	.	5.87288	38.2221	35	187
chr1	61454817	61455021	PotentialPeaks_FAIRE_peak_1044	34	.	2.56567	5.86589	3.47934	95
chr1	61463995	61464389	PotentialPeaks_FAIRE_peak_1045	65	.	2.95302	9.07725	6.50683	138
chr1	61476800	61476982	PotentialPeaks_FAIRE_peak_1046	43	.	2.61062	6.79096	4.34635	77
chr1	61517268	61517812	PotentialPeaks_FAIRE_peak_1047	123	.	3.92119	15.152	12.3843	217
chr1	61529172	61529388	PotentialPeaks_FAIRE_peak_1048	39	.	2.65415	6.3369	3.91272	143
chr1	61529775	61529927	PotentialPeaks_FAIRE_peak_1049	19	.	2.21179	4.12806	1.95767	23
chr1	61530015	61530297	PotentialPeaks_FAIRE_peak_1050	30	.	2.4772	5.40904	3.06515	170
chr1	61537682	61537846	PotentialPeaks_FAIRE_peak_1051	26	.	2.38873	4.96681	2.67217	127
chr1	61569581	61569777	PotentialPeaks_FAIRE_peak_1052	73	.	3.27345	9.99766	7.38818	76
chr1	61569963	61570212	PotentialPeaks_FAIRE_peak_1053	84	.	3.45039	11.1503	8.49965	116
chr1	61576805	61577103	PotentialPeaks_FAIRE_peak_1054	120	.	3.77401	14.7594	12.0036	199
chr1	61599298	61599780	PotentialPeaks_FAIRE_peak_1055	102	.	3.7158	12.9596	10.2517	340
chr1	61667143	61667351	PotentialPeaks_FAIRE_peak_1056	39	.	2.65415	6.3369	3.91272	111
chr1	61685120	61685469	PotentialPeaks_FAIRE_peak_1057	101	.	3.45907	12.818	10.1177	202
chr1	61731847	61732270	PotentialPeaks_FAIRE_peak_1058	383	.	6.18184	41.6624	38.3884	115
chr1	61732592	61732761	PotentialPeaks_FAIRE_peak_1059	85	.	3.16252	11.2084	8.55619	73
chr1	61745589	61745761	PotentialPeaks_FAIRE_peak_1060	48	.	2.83109	7.31973	4.83219	84
chr1	61763193	61763345	PotentialPeaks_FAIRE_peak_1061	39	.	2.65415	6.3369	3.91272	32
chr1	61763583	61763737	PotentialPeaks_FAIRE_peak_1062	34	.	2.56567	5.86589	3.47934	101
chr1	61817867	61818113	PotentialPeaks_FAIRE_peak_1063	429	.	7.41234	46.2533	42.913	123
chr1	61947870	61948035	PotentialPeaks_FAIRE_peak_1064	53	.	2.91956	7.83078	5.31581	71
chr1	61959553	61959728	PotentialPeaks_FAIRE_peak_1065	39	.	2.65415	6.3369	3.91272	94
chr1	61971660	61971853	PotentialPeaks_FAIRE_peak_1066	127	.	4.06969	15.5119	12.733	89
chr1	62014499	62014728	PotentialPeaks_FAIRE_peak_1067	26	.	2.38873	4.96681	2.67217	84
chr1	62030958	62031114	PotentialPeaks_FAIRE_peak_1068	51	.	2.86629	7.629	5.13008	104
chr1	62044283	62044605	PotentialPeaks_FAIRE_peak_1069	68	.	3.18497	9.43818	6.85064	151
chr1	62063234	62063459	PotentialPeaks_FAIRE_peak_1070	122	.	3.95871	15.0406	12.2752	108
chr1	62063605	62063819	PotentialPeaks_FAIRE_peak_1071	66	.	3.13101	9.22684	6.65171	69
chr1	62064938	62065106	PotentialPeaks_FAIRE_peak_1072	72	.	3.17437	9.81205	7.21372	66
chr1	62100130	62100363	PotentialPeaks_FAIRE_peak_1073	53	.	2.91956	7.83078	5.31581	142
chr1	62101802	62101989	PotentialPeaks_FAIRE_peak_1074	34	.	2.56567	5.86589	3.47934	53
chr1	62126288	62126444	PotentialPeaks_FAIRE_peak_1075	26	.	2.38873	4.96681	2.67217	131
chr1	62145911	62146077	PotentialPeaks_FAIRE_peak_1076	48	.	2.83109	7.31973	4.83219	80
chr1	62191199	62191358	PotentialPeaks_FAIRE_peak_1077	19	.	2.21179	4.12806	1.95767	11
chr1	62228408	62228638	PotentialPeaks_FAIRE_peak_1078	84	.	3.42833	11.0617	8.41835	92
chr1	62237433	62237698	PotentialPeaks_FAIRE_peak_1079	167	.	4.60052	19.6135	16.7331	117
chr1	62256249	62256640	PotentialPeaks_FAIRE_peak_1080	43	.	2.74262	6.82164	4.36435	135
chr1	62355984	62356148	PotentialPeaks_FAIRE_peak_1081	48	.	2.83109	7.31973	4.83219	78
chr1	62360843	62361044	PotentialPeaks_FAIRE_peak_1082	53	.	2.87689	7.84877	5.33316	140
chr1	62371795	62372004	PotentialPeaks_FAIRE_peak_1083	79	.	3.36192	10.5685	7.93804	73
chr1	62374478	62374637	PotentialPeaks_FAIRE_peak_1084	34	.	2.56567	5.86589	3.47934	108
chr1	62462976	62463269	PotentialPeaks_FAIRE_peak_1085	39	.	2.65415	6.3369	3.91272	218
chr1	62567960	62568112	PotentialPeaks_FAIRE_peak_1086	19	.	2.21179	4.12806	1.95767	112
chr1	62629686	62629838	PotentialPeaks_FAIRE_peak_1087	39	.	2.65415	6.3369	3.91272	87
chr1	62644560	62644849	PotentialPeaks_FAIRE_peak_1088	64	.	3.09	9.06505	6.49487	200
chr1	62660633	62660785	PotentialPeaks_FAIRE_peak_1089	26	.	2.38873	4.96681	2.67217	59
chr1	62682949	62683101	PotentialPeaks_FAIRE_peak_1090	57	.	2.88944	8.25889	5.729	93
chr1	62694489	62694676	PotentialPeaks_FAIRE_peak_1091	35	.	2.46572	5.92187	3.53242	40
chr1	62694731	62694913	PotentialPeaks_FAIRE_peak_1092	45	.	2.67326	7.04355	4.57724	54
chr1	62743633	62743788	PotentialPeaks_FAIRE_peak_1093	60	.	2.85409	8.64551	6.09524	74
chr1	62747652	62747994	PotentialPeaks_FAIRE_peak_1094	328	.	5.0944	36.0758	32.8884	115
chr1	62749740	62749969	PotentialPeaks_FAIRE_peak_1095	343	.	4.95834	37.5954	34.3835	119
chr1	62754126	62754422	PotentialPeaks_FAIRE_peak_1096	51	.	2.4826	7.66253	5.16227	230
chr1	62764538	62764745	PotentialPeaks_FAIRE_peak_1097	48	.	2.61713	7.2779	4.8018	109
chr1	62773806	62774051	PotentialPeaks_FAIRE_peak_1098	84	.	3.18796	11.1204	8.47539	142
chr1	62789965	62790118	PotentialPeaks_FAIRE_peak_1099	52	.	2.69368	7.77035	5.26602	83
chr1	62797941	62798153	PotentialPeaks_FAIRE_peak_1100	67	.	2.9158	9.28161	6.70486	77
chr1	62826720	62826981	PotentialPeaks_FAIRE_peak_1101	109	.	3.23993	13.7069	10.978	98
chr1	62830018	62830170	PotentialPeaks_FAIRE_peak_1102	33	.	2.23247	5.67296	3.31439	69
chr1	62832954	62833132	PotentialPeaks_FAIRE_peak_1103	87	.	3.15498	11.3781	8.72171	91
chr1	62841092	62841456	PotentialPeaks_FAIRE_peak_1104	181	.	4.64251	21.1073	18.1944	261
chr1	62879216	62879368	PotentialPeaks_FAIRE_peak_1105	27	.	2.33619	5.03517	2.73635	85
chr1	62897695	62898330	PotentialPeaks_FAIRE_peak_1106	228	.	5.00261	25.9073	22.8981	353
chr1	62933726	62933962	PotentialPeaks_FAIRE_peak_1107	26	.	2.38626	4.9583	2.67217	137
chr1	62949744	62949948	PotentialPeaks_FAIRE_peak_1108	109	.	3.53245	13.6346	10.9072	94
chr1	62976147	62976374	PotentialPeaks_FAIRE_peak_1109	183	.	4.30189	21.3142	18.3976	124
chr1	63010930	63011179	PotentialPeaks_FAIRE_peak_1110	317	.	5.44754	34.9666	31.7969	148
chr1	63032933	63033118	PotentialPeaks_FAIRE_peak_1111	132	.	3.87956	16.045	13.2551	92
chr1	63159640	63159792	PotentialPeaks_FAIRE_peak_1112	51	.	2.57245	7.67784	5.17696	49
chr1	63161142	63161451	PotentialPeaks_FAIRE_peak_1113	501	.	6.90867	53.622	50.1809	157
chr1	63172087	63172281	PotentialPeaks_FAIRE_peak_1114	33	.	2.51886	5.69848	3.33839	74
chr1	63172988	63173141	PotentialPeaks_FAIRE_peak_1115	50	.	2.84368	7.54286	5.04705	98
chr1	63223168	63223762	PotentialPeaks_FAIRE_peak_1116	976	.	9.31803	101.746	97.6075	150
chr1	63227663	63227944	PotentialPeaks_FAIRE_peak_1117	961	.	8.96936	100.27	96.1553	131
chr1	63250873	63251323	PotentialPeaks_FAIRE_peak_1118	326	.	6.20979	35.8036	32.6202	270
chr1	63260691	63260856	PotentialPeaks_FAIRE_peak_1119	59	.	3.00024	8.51601	5.96997	83
chr1	63261280	63261480	PotentialPeaks_FAIRE_peak_1120	56	.	2.92004	8.19988	5.67205	138
chr1	63284093	63284337	PotentialPeaks_FAIRE_peak_1121	39	.	2.65415	6.3369	3.91272	107
chr1	63293559	63294041	PotentialPeaks_FAIRE_peak_1122	245	.	4.98902	27.6019	24.5599	311
chr1	63294593	63294866	PotentialPeaks_FAIRE_peak_1123	32	.	2.29257	5.59429	3.24011	139
chr1	63299419	63299819	PotentialPeaks_FAIRE_peak_1124	116	.	3.50416	14.4483	11.6991	294
chr1	63319370	63319843	PotentialPeaks_FAIRE_peak_1125	112	.	3.72398	14.0177	11.2819	376
chr1	63414601	63414895	PotentialPeaks_FAIRE_peak_1126	271	.	5.83912	30.2823	27.1908	146
chr1	63435799	63435957	PotentialPeaks_FAIRE_peak_1127	26	.	2.38873	4.96681	2.67217	6
chr1	63462940	63463123	PotentialPeaks_FAIRE_peak_1128	68	.	3.18497	9.43818	6.85064	95
chr1	63464538	63464884	PotentialPeaks_FAIRE_peak_1129	83	.	3.41459	11.0064	8.36449	117
chr1	63465134	63465296	PotentialPeaks_FAIRE_peak_1130	72	.	3.19473	9.89524	7.29441	76
chr1	63492652	63492811	PotentialPeaks_FAIRE_peak_1131	61	.	3.04808	8.70275	6.1506	83
chr1	63505021	63505355	PotentialPeaks_FAIRE_peak_1132	73	.	3.27345	9.99766	7.38818	203
chr1	63580958	63581288	PotentialPeaks_FAIRE_peak_1133	160	.	4.50131	18.862	16.0015	117
chr1	63620102	63620300	PotentialPeaks_FAIRE_peak_1134	120	.	3.98122	14.8595	12.0979	92
chr1	63661303	63661486	PotentialPeaks_FAIRE_peak_1135	108	.	3.80427	13.5831	10.857	84
chr1	63704646	63704940	PotentialPeaks_FAIRE_peak_1136	232	.	5.39676	26.3104	23.2925	149
chr1	63706223	63706470	PotentialPeaks_FAIRE_peak_1137	256	.	5.66218	28.6734	25.6105	130
chr1	63715993	63716145	PotentialPeaks_FAIRE_peak_1138	48	.	2.83109	7.31973	4.83219	23
chr1	63776795	63777455	PotentialPeaks_FAIRE_peak_1139	451	.	7.57318	48.5266	45.1545	415
chr1	63809815	63810306	PotentialPeaks_FAIRE_peak_1140	262	.	5.25458	29.3707	26.2972	299
chr1	63810452	63810875	PotentialPeaks_FAIRE_peak_1141	134	.	3.86589	16.2479	13.4505	247
chr1	63813148	63813362	PotentialPeaks_FAIRE_peak_1142	26	.	2.17702	4.98347	2.68787	83
chr1	63866513	63866825	PotentialPeaks_FAIRE_peak_1143	84	.	3.45039	11.1503	8.49965	209
chr1	63875069	63875513	PotentialPeaks_FAIRE_peak_1144	181	.	4.77746	21.048	18.1362	211
chr1	63949909	63950107	PotentialPeaks_FAIRE_peak_1145	58	.	3.00803	8.35443	5.81364	65
chr1	63979199	63979372	PotentialPeaks_FAIRE_peak_1146	73	.	3.27345	9.99766	7.38818	87
chr1	64000107	64000354	PotentialPeaks_FAIRE_peak_1147	53	.	2.91956	7.83078	5.31581	156
chr1	64023466	64023796	PotentialPeaks_FAIRE_peak_1148	48	.	2.83109	7.31973	4.83219	240
chr1	64041309	64041691	PotentialPeaks_FAIRE_peak_1149	40	.	2.52483	6.44138	4.01266	141
chr1	64107343	64107599	PotentialPeaks_FAIRE_peak_1150	33	.	2.49337	5.74801	3.38501	126
chr1	64113411	64113805	PotentialPeaks_FAIRE_peak_1151	450	.	6.81246	48.3872	45.017	259
chr1	64134369	64134622	PotentialPeaks_FAIRE_peak_1152	54	.	2.78229	7.98806	5.46761	130
chr1	64167896	64168048	PotentialPeaks_FAIRE_peak_1153	59	.	2.34729	8.45385	5.90981	90
chr1	64168099	64168485	PotentialPeaks_FAIRE_peak_1154	1131	.	8.63367	117.55	113.16	238
chr1	64168764	64169088	PotentialPeaks_FAIRE_peak_1155	253	.	3.9834	28.4506	25.3932	121
chr1	64218513	64218771	PotentialPeaks_FAIRE_peak_1156	63	.	3.0965	8.89034	6.32549	207
chr1	64238518	64238728	PotentialPeaks_FAIRE_peak_1157	46	.	2.55024	7.13196	4.66201	100
chr1	64240087	64240296	PotentialPeaks_FAIRE_peak_1158	48	.	2.55713	7.31011	4.83219	98
chr1	64242867	64243093	PotentialPeaks_FAIRE_peak_1159	74	.	2.88893	10.0603	7.44918	139
chr1	64267216	64267396	PotentialPeaks_FAIRE_peak_1160	71	.	3.0173	9.73984	7.14357	44
chr1	64272754	64273087	PotentialPeaks_FAIRE_peak_1161	51	.	2.73534	7.62255	5.12373	55
chr1	64335584	64335736	PotentialPeaks_FAIRE_peak_1162	48	.	2.83109	7.31973	4.83219	76
chr1	64352001	64352448	PotentialPeaks_FAIRE_peak_1163	155	.	4.07091	18.3621	15.514	300
chr1	64358198	64358352	PotentialPeaks_FAIRE_peak_1164	34	.	2.56567	5.86589	3.47934	52
chr1	64384918	64385126	PotentialPeaks_FAIRE_peak_1165	58	.	3.00803	8.35443	5.81364	89
chr1	64386293	64386539	PotentialPeaks_FAIRE_peak_1166	30	.	2.4772	5.40904	3.06515	95
chr1	64413676	64413845	PotentialPeaks_FAIRE_peak_1167	43	.	2.74262	6.82164	4.36435	77
chr1	64414280	64414558	PotentialPeaks_FAIRE_peak_1168	30	.	2.4772	5.40904	3.06515	151
chr1	64427851	64428375	PotentialPeaks_FAIRE_peak_1169	380	.	6.98925	41.3421	38.0723	384
chr1	64488840	64489382	PotentialPeaks_FAIRE_peak_1170	62	.	2.6386	8.76962	6.2153	80
chr1	64492418	64492934	PotentialPeaks_FAIRE_peak_1171	634	.	6.8877	67.0592	63.441	390
chr1	64494757	64494928	PotentialPeaks_FAIRE_peak_1172	217	.	4.37506	24.7801	21.7915	101
chr1	64579117	64579667	PotentialPeaks_FAIRE_peak_1173	1200	.	11.6171	124.54	120.041	263
chr1	64663233	64663497	PotentialPeaks_FAIRE_peak_1174	90	.	3.02058	11.6831	9.0191	84
chr1	64663667	64663952	PotentialPeaks_FAIRE_peak_1175	697	.	7.82332	73.4319	69.7242	151
chr1	64664258	64664493	PotentialPeaks_FAIRE_peak_1176	220	.	4.32034	25.0577	22.0646	134
chr1	64719407	64719589	PotentialPeaks_FAIRE_peak_1177	68	.	3.18497	9.43818	6.85064	131
chr1	64736794	64737531	PotentialPeaks_FAIRE_peak_1178	1225	.	11.6968	127.072	122.535	525
chr1	64751826	64752146	PotentialPeaks_FAIRE_peak_1179	153	.	4.34903	18.1955	15.3537	195
chr1	64764170	64764441	PotentialPeaks_FAIRE_peak_1180	263	.	5.41864	29.4585	26.3836	137
chr1	64767701	64768028	PotentialPeaks_FAIRE_peak_1181	198	.	4.94431	22.8189	19.8708	113
chr1	64784120	64784695	PotentialPeaks_FAIRE_peak_1182	445	.	6.22414	47.9344	44.5701	431
chr1	64838590	64838826	PotentialPeaks_FAIRE_peak_1183	52	.	2.6966	7.78319	5.27842	94
chr1	64842413	64842590	PotentialPeaks_FAIRE_peak_1184	23	.	2.29788	4.53162	2.30247	121
chr1	64862819	64862971	PotentialPeaks_FAIRE_peak_1185	68	.	3.18497	9.43818	6.85064	52
chr1	64900272	64900534	PotentialPeaks_FAIRE_peak_1186	226	.	4.89007	25.6852	22.6795	126
chr1	64937940	64938092	PotentialPeaks_FAIRE_peak_1187	41	.	2.68546	6.61071	4.17435	97
chr1	64963575	64964003	PotentialPeaks_FAIRE_peak_1188	53	.	2.84401	7.89662	5.37934	344
chr1	64965622	64965782	PotentialPeaks_FAIRE_peak_1189	45	.	2.66049	6.99225	4.52789	124
chr1	64970807	64971004	PotentialPeaks_FAIRE_peak_1190	49	.	2.76275	7.40042	4.90995	108
chr1	64971363	64971550	PotentialPeaks_FAIRE_peak_1191	34	.	2.50289	5.78325	3.41832	109
chr1	64988771	64988926	PotentialPeaks_FAIRE_peak_1192	47	.	2.79797	7.19607	4.72344	119
chr1	64992766	64992959	PotentialPeaks_FAIRE_peak_1193	73	.	3.27345	9.99766	7.38818	100
chr1	64993312	64993561	PotentialPeaks_FAIRE_peak_1194	30	.	2.4772	5.40904	3.06515	131
chr1	65002999	65003635	PotentialPeaks_FAIRE_peak_1195	480	.	7.96244	51.4274	48.0153	376
chr1	65022053	65022626	PotentialPeaks_FAIRE_peak_1196	43	.	2.53273	6.76355	4.3202	149
chr1	65024831	65025174	PotentialPeaks_FAIRE_peak_1197	135	.	3.77881	16.3451	13.5459	187
chr1	65032774	65033062	PotentialPeaks_FAIRE_peak_1198	72	.	3.18248	9.84523	7.24592	109
chr1	65056803	65057066	PotentialPeaks_FAIRE_peak_1199	279	.	5.92759	31.0966	27.9909	113
chr1	65151645	65151804	PotentialPeaks_FAIRE_peak_1200	34	.	2.56567	5.86589	3.47934	36
chr1	65158703	65158914	PotentialPeaks_FAIRE_peak_1201	263	.	5.75065	29.4746	26.3973	88
chr1	65200604	65200757	PotentialPeaks_FAIRE_peak_1202	48	.	2.83109	7.31973	4.83219	122
chr1	65224826	65225150	PotentialPeaks_FAIRE_peak_1203	538	.	6.69366	57.3088	53.8181	159
chr1	65225435	65226066	PotentialPeaks_FAIRE_peak_1204	858	.	8.77261	89.799	85.8486	317
chr1	65232769	65233440	PotentialPeaks_FAIRE_peak_1205	1124	.	11.8888	116.809	112.431	421
chr1	65329424	65329645	PotentialPeaks_FAIRE_peak_1206	174	.	4.68899	20.3267	17.4305	101
chr1	65355219	65355478	PotentialPeaks_FAIRE_peak_1207	96	.	3.62733	12.3462	9.65687	109
chr1	65360941	65361243	PotentialPeaks_FAIRE_peak_1208	51	.	2.8151	7.60703	5.10884	126
chr1	65381475	65381630	PotentialPeaks_FAIRE_peak_1209	23	.	2.30026	4.53965	2.30247	145
chr1	66051047	66051212	PotentialPeaks_FAIRE_peak_1210	53	.	2.91956	7.83078	5.31581	91
chr1	66195401	66195602	PotentialPeaks_FAIRE_peak_1211	73	.	3.27345	9.99766	7.38818	125
chr1	66221588	66221964	PotentialPeaks_FAIRE_peak_1212	146	.	4.3351	17.5236	14.6947	124
chr1	66222576	66222941	PotentialPeaks_FAIRE_peak_1213	108	.	3.80427	13.5831	10.857	132
chr1	66241996	66242219	PotentialPeaks_FAIRE_peak_1214	58	.	3.00803	8.35443	5.81364	91
chr1	66314775	66314943	PotentialPeaks_FAIRE_peak_1215	63	.	3.0965	8.89034	6.32549	69
chr1	66329154	66329355	PotentialPeaks_FAIRE_peak_1216	96	.	3.62733	12.3462	9.65687	88
chr1	66367459	66367631	PotentialPeaks_FAIRE_peak_1217	99	.	3.64318	12.6599	9.96332	71
chr1	66368256	66368746	PotentialPeaks_FAIRE_peak_1218	179	.	4.65981	20.8577	17.952	188
chr1	66382574	66382783	PotentialPeaks_FAIRE_peak_1219	73	.	3.27345	9.99766	7.38818	78
chr1	66433348	66433604	PotentialPeaks_FAIRE_peak_1220	346	.	6.63536	37.8335	34.6168	134
chr1	66435139	66435466	PotentialPeaks_FAIRE_peak_1221	58	.	3.00803	8.35443	5.81364	261
chr1	66454288	66454534	PotentialPeaks_FAIRE_peak_1222	48	.	2.83109	7.31973	4.83219	114
chr1	66514680	66514833	PotentialPeaks_FAIRE_peak_1223	39	.	2.65415	6.3369	3.91272	73
chr1	66514899	66515058	PotentialPeaks_FAIRE_peak_1224	79	.	3.36192	10.5685	7.93804	67
chr1	66542044	66542224	PotentialPeaks_FAIRE_peak_1225	30	.	2.4772	5.40904	3.06515	52
chr1	66701594	66702005	PotentialPeaks_FAIRE_peak_1226	167	.	4.60052	19.6135	16.7331	276
chr1	66718043	66718244	PotentialPeaks_FAIRE_peak_1227	43	.	2.74262	6.82164	4.36435	95
chr1	66747211	66747714	PotentialPeaks_FAIRE_peak_1228	810	.	10.882	84.9265	81.0498	139
chr1	66863433	66863755	PotentialPeaks_FAIRE_peak_1229	386	.	6.08225	41.9341	38.6563	151
chr1	66864081	66864438	PotentialPeaks_FAIRE_peak_1230	341	.	5.65577	37.3647	34.156	166
chr1	66885161	66885382	PotentialPeaks_FAIRE_peak_1231	312	.	6.28148	34.4167	31.2549	96
chr1	66909277	66909429	PotentialPeaks_FAIRE_peak_1232	34	.	2.56567	5.86589	3.47934	34
chr1	66909831	66909998	PotentialPeaks_FAIRE_peak_1233	23	.	2.30026	4.53965	2.30247	30
chr1	66942361	66942621	PotentialPeaks_FAIRE_peak_1234	102	.	3.7158	12.9596	10.2517	111
chr1	66942759	66943005	PotentialPeaks_FAIRE_peak_1235	79	.	3.36192	10.5685	7.93804	99
chr1	66987634	66987816	PotentialPeaks_FAIRE_peak_1236	160	.	4.51205	18.9085	16.0441	88
chr1	67038834	67039012	PotentialPeaks_FAIRE_peak_1237	43	.	2.74262	6.82164	4.36435	78
chr1	67085331	67085655	PotentialPeaks_FAIRE_peak_1238	604	.	8.65163	64.0207	60.4429	150
chr1	67108036	67108324	PotentialPeaks_FAIRE_peak_1239	263	.	5.75065	29.4746	26.3973	185
chr1	67225137	67225410	PotentialPeaks_FAIRE_peak_1240	48	.	2.83109	7.31973	4.83219	182
chr1	67227832	67228037	PotentialPeaks_FAIRE_peak_1241	217	.	5.21982	24.77	21.7817	108
chr1	67523639	67523798	PotentialPeaks_FAIRE_peak_1242	30	.	2.4772	5.40904	3.06515	95
chr1	67841512	67842003	PotentialPeaks_FAIRE_peak_1243	527	.	8.40479	56.2076	52.7314	291
chr1	68086864	68087016	PotentialPeaks_FAIRE_peak_1244	68	.	3.18497	9.43818	6.85064	36
chr1	68093003	68093265	PotentialPeaks_FAIRE_peak_1245	53	.	2.91956	7.83078	5.31581	136
chr1	68093693	68094045	PotentialPeaks_FAIRE_peak_1246	210	.	5.13135	24.0106	21.0374	119
chr1	68109666	68109861	PotentialPeaks_FAIRE_peak_1247	68	.	3.18497	9.43818	6.85064	105
chr1	68225086	68225526	PotentialPeaks_FAIRE_peak_1248	195	.	4.9544	22.5141	19.5711	246
chr1	68447812	68448055	PotentialPeaks_FAIRE_peak_1249	90	.	3.53886	11.743	9.0727	107
chr1	68933499	68933725	PotentialPeaks_FAIRE_peak_1250	108	.	3.80427	13.5831	10.857	103
chr1	69002196	69002373	PotentialPeaks_FAIRE_peak_1251	43	.	2.74262	6.82164	4.36435	36
chr1	69071530	69071905	PotentialPeaks_FAIRE_peak_1252	346	.	6.63536	37.8335	34.6168	144
chr1	69151762	69151916	PotentialPeaks_FAIRE_peak_1253	54	.	2.70317	7.97417	5.45429	42
chr1	69152033	69152367	PotentialPeaks_FAIRE_peak_1254	74	.	2.99308	10.0119	7.40211	128
chr1	69152443	69152929	PotentialPeaks_FAIRE_peak_1255	144	.	3.857	17.2732	14.4525	131
chr1	69155073	69155260	PotentialPeaks_FAIRE_peak_1256	101	.	3.36254	12.8175	10.1172	62
chr1	69165290	69165442	PotentialPeaks_FAIRE_peak_1257	73	.	3.27345	9.99766	7.38818	64
chr1	69185517	69185741	PotentialPeaks_FAIRE_peak_1258	287	.	6.01606	31.9172	28.7974	108
chr1	69204044	69204257	PotentialPeaks_FAIRE_peak_1259	90	.	3.53886	11.743	9.0727	114
chr1	69288389	69288663	PotentialPeaks_FAIRE_peak_1260	329	.	6.45842	36.1133	32.9239	117
chr1	69545491	69545828	PotentialPeaks_FAIRE_peak_1261	296	.	6.10453	32.7442	29.6103	201
chr1	69585258	69585520	PotentialPeaks_FAIRE_peak_1262	73	.	3.27345	9.99766	7.38818	179
chr1	69733711	69733906	PotentialPeaks_FAIRE_peak_1263	155	.	4.07091	18.3621	15.514	100
chr1	69734055	69734341	PotentialPeaks_FAIRE_peak_1264	141	.	3.89527	16.9302	14.1159	151
chr1	69735641	69735857	PotentialPeaks_FAIRE_peak_1265	106	.	3.47778	13.3741	10.6566	119
chr1	69775983	69776204	PotentialPeaks_FAIRE_peak_1266	232	.	5.39676	26.3104	23.2925	82
chr1	69836919	69837229	PotentialPeaks_FAIRE_peak_1267	434	.	7.52008	46.7669	43.4187	117
chr1	69837305	69837540	PotentialPeaks_FAIRE_peak_1268	43	.	2.74262	6.82164	4.36435	135
chr1	70120105	70120386	PotentialPeaks_FAIRE_peak_1269	133	.	4.15816	16.1735	13.3776	132
chr1	70369752	70370001	PotentialPeaks_FAIRE_peak_1270	53	.	2.91956	7.83078	5.31581	126
chr1	70490196	70490374	PotentialPeaks_FAIRE_peak_1271	73	.	3.27345	9.99766	7.38818	88
chr1	70772232	70772408	PotentialPeaks_FAIRE_peak_1272	96	.	3.62733	12.3462	9.65687	48
chr1	70884905	70885068	PotentialPeaks_FAIRE_peak_1273	39	.	2.65415	6.3369	3.91272	72
chr1	70900069	70900288	PotentialPeaks_FAIRE_peak_1274	73	.	3.25688	9.93234	7.3304	91
chr1	70958014	70958193	PotentialPeaks_FAIRE_peak_1275	43	.	2.74262	6.82164	4.36435	135
chr1	71070521	71070709	PotentialPeaks_FAIRE_peak_1276	58	.	3.00803	8.35443	5.81364	107
chr1	71083641	71083873	PotentialPeaks_FAIRE_peak_1277	120	.	3.98122	14.8595	12.0979	119
chr1	71148969	71149178	PotentialPeaks_FAIRE_peak_1278	153	.	3.88792	18.2416	15.3958	114
chr1	71149413	71149887	PotentialPeaks_FAIRE_peak_1279	536	.	7.24102	57.0962	53.6089	192
chr1	71316235	71316388	PotentialPeaks_FAIRE_peak_1280	58	.	3.00803	8.35443	5.81364	81
chr1	71318814	71319001	PotentialPeaks_FAIRE_peak_1281	53	.	2.91956	7.83078	5.31581	132
chr1	71336185	71336374	PotentialPeaks_FAIRE_peak_1282	140	.	4.24663	16.8441	14.0316	122
chr1	71546844	71546996	PotentialPeaks_FAIRE_peak_1283	39	.	2.65415	6.3369	3.91272	41
chr1	71553899	71554102	PotentialPeaks_FAIRE_peak_1284	180	.	4.61914	20.9994	18.0912	97
chr1	71603333	71603857	PotentialPeaks_FAIRE_peak_1285	416	.	6.96575	45.0063	41.6833	329
chr1	71604771	71604930	PotentialPeaks_FAIRE_peak_1286	87	.	3.3383	11.3646	8.70854	71
chr1	71661247	71661895	PotentialPeaks_FAIRE_peak_1287	227	.	4.90671	25.7709	22.7638	482
chr1	71699198	71699476	PotentialPeaks_FAIRE_peak_1288	119	.	3.59576	14.6687	11.9148	136
chr1	71699721	71700026	PotentialPeaks_FAIRE_peak_1289	493	.	7.15952	52.7389	49.3097	160
chr1	71720270	71720481	PotentialPeaks_FAIRE_peak_1290	79	.	3.36192	10.5685	7.93804	109
chr1	71883736	71883919	PotentialPeaks_FAIRE_peak_1291	53	.	2.91956	7.83078	5.31581	120
chr1	71896318	71896470	PotentialPeaks_FAIRE_peak_1292	39	.	2.65415	6.3369	3.91272	36
chr1	71984441	71984688	PotentialPeaks_FAIRE_peak_1293	43	.	2.74262	6.82164	4.36435	115
chr1	72069380	72069532	PotentialPeaks_FAIRE_peak_1294	19	.	2.21179	4.12806	1.95767	12
chr1	72089633	72089785	PotentialPeaks_FAIRE_peak_1295	26	.	2.38873	4.96681	2.67217	107
chr1	72111766	72111918	PotentialPeaks_FAIRE_peak_1296	34	.	2.56567	5.86589	3.47934	129
chr1	72167905	72168122	PotentialPeaks_FAIRE_peak_1297	53	.	2.91654	7.81938	5.31323	86
chr1	72170263	72170510	PotentialPeaks_FAIRE_peak_1298	256	.	5.66218	28.6734	25.6105	106
chr1	72188530	72188896	PotentialPeaks_FAIRE_peak_1299	443	.	7.60855	47.6891	44.3278	123
chr1	72258317	72258469	PotentialPeaks_FAIRE_peak_1300	49	.	2.70399	7.49129	4.99738	135
chr1	72258828	72259057	PotentialPeaks_FAIRE_peak_1301	145	.	4.03639	17.3437	14.5214	98
chr1	72272447	72272652	PotentialPeaks_FAIRE_peak_1302	179	.	4.3863	20.8319	17.9267	116
chr1	72273049	72273247	PotentialPeaks_FAIRE_peak_1303	78	.	3.14744	10.5219	7.89797	102
chr1	72282897	72283283	PotentialPeaks_FAIRE_peak_1304	416	.	7.34314	44.9377	41.6156	150
chr1	72290322	72290765	PotentialPeaks_FAIRE_peak_1305	349	.	6.60115	38.1259	34.9052	174
chr1	72290961	72291225	PotentialPeaks_FAIRE_peak_1306	135	.	4.12001	16.2999	13.5015	151
chr1	72301199	72301501	PotentialPeaks_FAIRE_peak_1307	438	.	6.75834	47.1562	43.803	151
chr1	72301795	72302090	PotentialPeaks_FAIRE_peak_1308	63	.	2.88222	8.94868	6.38202	122
chr1	72309336	72309488	PotentialPeaks_FAIRE_peak_1309	53	.	2.91956	7.83078	5.31581	71
chr1	72330744	72331062	PotentialPeaks_FAIRE_peak_1310	607	.	7.69079	64.3604	60.7779	168
chr1	72333454	72333719	PotentialPeaks_FAIRE_peak_1311	100	.	3.21527	12.7245	10.0264	173
chr1	72353807	72354316	PotentialPeaks_FAIRE_peak_1312	777	.	9.34677	81.5409	77.7148	146
chr1	72360333	72360532	PotentialPeaks_FAIRE_peak_1313	162	.	4.35549	19.1441	16.2754	87
chr1	72419126	72419388	PotentialPeaks_FAIRE_peak_1314	23	.	2.30026	4.53965	2.30247	204
chr1	72426649	72426817	PotentialPeaks_FAIRE_peak_1315	45	.	2.71516	7.0477	4.58111	107
chr1	72448337	72448543	PotentialPeaks_FAIRE_peak_1316	70	.	2.90664	9.60394	7.01166	137
chr1	72453103	72453489	PotentialPeaks_FAIRE_peak_1317	60	.	2.85409	8.64551	6.09524	125
chr1	72460496	72461074	PotentialPeaks_FAIRE_peak_1318	69	.	2.84792	9.49992	6.91062	510
chr1	72461202	72461519	PotentialPeaks_FAIRE_peak_1319	102	.	3.25282	12.9216	10.2189	178
chr1	72501593	72501767	PotentialPeaks_FAIRE_peak_1320	38	.	2.55587	6.27353	3.86658	105
chr1	72502507	72502849	PotentialPeaks_FAIRE_peak_1321	46	.	2.70244	7.16042	4.68925	49
chr1	72547860	72548029	PotentialPeaks_FAIRE_peak_1322	39	.	2.65415	6.3369	3.91272	37
chr1	72583511	72583867	PotentialPeaks_FAIRE_peak_1323	218	.	4.85158	24.8005	21.8116	217
chr1	72624122	72624310	PotentialPeaks_FAIRE_peak_1324	92	.	3.30425	11.8743	9.20087	72
chr1	72629532	72630354	PotentialPeaks_FAIRE_peak_1325	1056	.	9.87161	109.962	105.694	228
chr1	72664837	72665035	PotentialPeaks_FAIRE_peak_1326	28	.	2.39081	5.10459	2.80134	92
chr1	72666679	72666850	PotentialPeaks_FAIRE_peak_1327	53	.	2.91956	7.83078	5.31581	75
chr1	72681937	72682094	PotentialPeaks_FAIRE_peak_1328	43	.	2.68685	6.77664	4.33273	102
chr1	72757691	72757933	PotentialPeaks_FAIRE_peak_1329	810	.	10.882	84.9265	81.0498	129
chr1	72763655	72763859	PotentialPeaks_FAIRE_peak_1330	207	.	4.76054	23.6657	20.7007	100
chr1	72765516	72765716	PotentialPeaks_FAIRE_peak_1331	156	.	4.09818	18.4984	15.6478	113
chr1	72766927	72767146	PotentialPeaks_FAIRE_peak_1332	50	.	2.66898	7.50271	5.00838	138
chr1	72802214	72802397	PotentialPeaks_FAIRE_peak_1333	66	.	2.94702	9.2373	6.66187	70
chr1	72819590	72819742	PotentialPeaks_FAIRE_peak_1334	48	.	2.83109	7.31973	4.83219	98
chr1	72852452	72853329	PotentialPeaks_FAIRE_peak_1335	179	.	4.06272	20.8746	17.9687	381
chr1	72861810	72862084	PotentialPeaks_FAIRE_peak_1336	43	.	2.65842	6.8261	4.36853	144
chr1	72862304	72862456	PotentialPeaks_FAIRE_peak_1337	25	.	2.3154	4.83608	2.57761	130
chr1	72901455	72901783	PotentialPeaks_FAIRE_peak_1338	279	.	5.1676	31.1004	27.9946	202
chr1	72912478	72912819	PotentialPeaks_FAIRE_peak_1339	232	.	4.57146	26.265	23.2499	93
chr1	72917691	72917868	PotentialPeaks_FAIRE_peak_1340	129	.	3.29638	15.7679	12.9839	62
chr1	72918390	72918588	PotentialPeaks_FAIRE_peak_1341	52	.	2.43202	7.80201	5.29644	104
chr1	72919153	72919321	PotentialPeaks_FAIRE_peak_1342	141	.	3.38048	16.9707	14.1557	96
chr1	72924536	72924717	PotentialPeaks_FAIRE_peak_1343	94	.	3.21806	12.1053	9.42635	80
chr1	73019266	73019418	PotentialPeaks_FAIRE_peak_1344	39	.	2.56525	6.30987	3.90098	62
chr1	73037296	73037448	PotentialPeaks_FAIRE_peak_1345	43	.	2.68341	6.76356	4.3202	64
chr1	73085746	73085899	PotentialPeaks_FAIRE_peak_1346	44	.	2.59029	6.85934	4.40041	112
chr1	73092586	73092799	PotentialPeaks_FAIRE_peak_1347	38	.	2.57975	6.21603	3.81183	62
chr1	73103042	73103194	PotentialPeaks_FAIRE_peak_1348	38	.	2.54347	6.22542	3.82081	25
chr1	73117123	73117277	PotentialPeaks_FAIRE_peak_1349	63	.	3.0965	8.89034	6.32549	46
chr1	73123170	73123377	PotentialPeaks_FAIRE_peak_1350	63	.	3.0965	8.89034	6.32549	98
chr1	73133331	73133483	PotentialPeaks_FAIRE_peak_1351	72	.	3.19473	9.89524	7.29441	79
chr1	73136233	73136485	PotentialPeaks_FAIRE_peak_1352	58	.	3.00803	8.35443	5.81364	131
chr1	73136726	73136909	PotentialPeaks_FAIRE_peak_1353	30	.	2.4772	5.40904	3.06515	32
chr1	73146522	73146674	PotentialPeaks_FAIRE_peak_1354	58	.	3.00803	8.35443	5.81364	107
chr1	73200111	73200263	PotentialPeaks_FAIRE_peak_1355	34	.	2.48813	5.86918	3.48232	113
chr1	73200453	73200718	PotentialPeaks_FAIRE_peak_1356	48	.	2.74573	7.33291	4.84489	138
chr1	73216031	73216361	PotentialPeaks_FAIRE_peak_1357	57	.	2.94629	8.30379	5.77225	206
chr1	73260386	73260625	PotentialPeaks_FAIRE_peak_1358	43	.	2.74262	6.82164	4.36435	102
chr1	73278001	73278156	PotentialPeaks_FAIRE_peak_1359	58	.	3.00803	8.35443	5.81364	32
chr1	73317329	73317830	PotentialPeaks_FAIRE_peak_1360	96	.	3.62733	12.3462	9.65687	237
chr1	73346334	73346486	PotentialPeaks_FAIRE_peak_1361	23	.	2.30026	4.53965	2.30247	85
chr1	73386521	73386725	PotentialPeaks_FAIRE_peak_1362	53	.	2.91956	7.83078	5.31581	96
chr1	73409768	73409924	PotentialPeaks_FAIRE_peak_1363	34	.	2.42579	5.76475	3.40099	21
chr1	73410106	73410610	PotentialPeaks_FAIRE_peak_1364	148	.	3.98495	17.6513	14.8199	289
chr1	73471747	73471904	PotentialPeaks_FAIRE_peak_1365	30	.	2.4772	5.40904	3.06515	14
chr1	73517001	73517235	PotentialPeaks_FAIRE_peak_1366	30	.	2.4772	5.40904	3.06515	119
chr1	73585247	73585588	PotentialPeaks_FAIRE_peak_1367	100	.	3.61045	12.7703	10.0711	91
chr1	73592053	73592256	PotentialPeaks_FAIRE_peak_1368	34	.	2.56567	5.86589	3.47934	150
chr1	73617755	73617935	PotentialPeaks_FAIRE_peak_1369	26	.	2.38873	4.96681	2.67217	122
chr1	73638180	73638529	PotentialPeaks_FAIRE_peak_1370	39	.	2.65415	6.3369	3.91272	81
chr1	73665186	73665429	PotentialPeaks_FAIRE_peak_1371	167	.	4.60052	19.6135	16.7331	135
chr1	73689125	73689617	PotentialPeaks_FAIRE_peak_1372	123	.	3.84317	15.0738	12.3076	342
chr1	73791279	73791441	PotentialPeaks_FAIRE_peak_1373	48	.	2.83109	7.31973	4.83219	54
chr1	73833974	73834645	PotentialPeaks_FAIRE_peak_1374	208	.	4.79424	23.8325	20.8647	550
chr1	73872948	73873196	PotentialPeaks_FAIRE_peak_1375	365	.	6.07651	39.7897	36.5435	124
chr1	73885040	73885307	PotentialPeaks_FAIRE_peak_1376	30	.	2.46136	5.35348	3.0342	200
chr1	73897064	73897482	PotentialPeaks_FAIRE_peak_1377	87	.	3.2978	11.4067	8.74951	279
chr1	73900584	73900749	PotentialPeaks_FAIRE_peak_1378	44	.	2.64784	6.94135	4.47912	86
chr1	73909452	73909622	PotentialPeaks_FAIRE_peak_1379	48	.	2.83109	7.31973	4.83219	107
chr1	73948178	73948410	PotentialPeaks_FAIRE_peak_1380	240	.	5.48523	27.0912	24.0585	127
chr1	73948943	73949256	PotentialPeaks_FAIRE_peak_1381	436	.	7.45984	46.9776	43.6268	195
chr1	73972940	73973114	PotentialPeaks_FAIRE_peak_1382	69	.	3.02175	9.56659	6.97536	55
chr1	74009584	74009854	PotentialPeaks_FAIRE_peak_1383	99	.	3.33403	12.6783	9.98125	142
chr1	74033354	74033543	PotentialPeaks_FAIRE_peak_1384	164	.	4.26486	19.3194	16.4474	88
chr1	74124015	74124211	PotentialPeaks_FAIRE_peak_1385	87	.	3.35867	11.4531	8.79478	90
chr1	74144910	74145147	PotentialPeaks_FAIRE_peak_1386	142	.	3.87361	17.0906	14.2732	97
chr1	74145291	74145461	PotentialPeaks_FAIRE_peak_1387	43	.	2.49591	6.74579	4.30328	91
chr1	74150165	74150880	PotentialPeaks_FAIRE_peak_1388	103	.	3.27513	13.0382	10.3285	88
chr1	74157922	74158399	PotentialPeaks_FAIRE_peak_1389	224	.	4.59431	25.4267	22.4275	151
chr1	74165766	74165970	PotentialPeaks_FAIRE_peak_1390	47	.	2.6874	7.26094	4.78563	112
chr1	74171752	74172002	PotentialPeaks_FAIRE_peak_1391	452	.	6.93678	48.6206	45.2463	121
chr1	74242686	74242838	PotentialPeaks_FAIRE_peak_1392	68	.	3.04085	9.45508	6.86704	89
chr1	74252551	74252728	PotentialPeaks_FAIRE_peak_1393	173	.	4.67154	20.2505	17.3586	109
chr1	74282826	74283198	PotentialPeaks_FAIRE_peak_1394	744	.	8.61701	78.191	74.4146	172
chr1	74331175	74331729	PotentialPeaks_FAIRE_peak_1395	1003	.	8.8649	104.529	100.347	184
chr1	74342432	74342588	PotentialPeaks_FAIRE_peak_1396	48	.	2.62279	7.30252	4.8254	100
chr1	74360009	74360185	PotentialPeaks_FAIRE_peak_1397	173	.	4.60485	20.2828	17.3903	92
chr1	74378861	74379329	PotentialPeaks_FAIRE_peak_1398	687	.	7.53722	72.4147	68.7215	172
chr1	74402707	74402906	PotentialPeaks_FAIRE_peak_1399	53	.	2.91956	7.83078	5.31581	122
chr1	74408437	74408813	PotentialPeaks_FAIRE_peak_1400	378	.	6.65485	41.1093	37.844	142
chr1	74415370	74415560	PotentialPeaks_FAIRE_peak_1401	89	.	3.50682	11.6131	8.95089	67
chr1	74433179	74433382	PotentialPeaks_FAIRE_peak_1402	41	.	2.29386	6.55684	4.12301	113
chr1	74433433	74433909	PotentialPeaks_FAIRE_peak_1403	314	.	4.83903	34.6541	31.4888	117
chr1	74437879	74438311	PotentialPeaks_FAIRE_peak_1404	716	.	6.67471	75.4254	71.6888	271
chr1	74442204	74442423	PotentialPeaks_FAIRE_peak_1405	62	.	2.34268	8.79532	6.24015	127
chr1	74443019	74443216	PotentialPeaks_FAIRE_peak_1406	39	.	2.11746	6.33621	3.91272	97
chr1	74443391	74443770	PotentialPeaks_FAIRE_peak_1407	94	.	2.81368	12.0916	9.41296	116
chr1	74443866	74444222	PotentialPeaks_FAIRE_peak_1408	519	.	5.9686	55.3876	51.9224	183
chr1	74552046	74553024	PotentialPeaks_FAIRE_peak_1409	865	.	8.56595	90.5096	86.5481	471
chr1	74553119	74553441	PotentialPeaks_FAIRE_peak_1410	183	.	3.89592	21.256	18.3405	130
chr1	74634280	74635058	PotentialPeaks_FAIRE_peak_1411	1026	.	9.70042	106.909	102.69	545
chr1	74647638	74647790	PotentialPeaks_FAIRE_peak_1412	22	.	2.21479	4.4742	2.27525	125
chr1	74647851	74648206	PotentialPeaks_FAIRE_peak_1413	794	.	10.0822	83.3045	79.452	173
chr1	74678098	74678280	PotentialPeaks_FAIRE_peak_1414	33	.	2.52892	5.73452	3.37235	90
chr1	74690580	74690741	PotentialPeaks_FAIRE_peak_1415	58	.	3.00803	8.35443	5.81364	80
chr1	74707991	74708485	PotentialPeaks_FAIRE_peak_1416	536	.	8.49326	57.1774	53.6883	171
chr1	74708569	74708757	PotentialPeaks_FAIRE_peak_1417	38	.	2.60288	6.30292	3.89429	148
chr1	74806454	74806670	PotentialPeaks_FAIRE_peak_1418	93	.	3.48188	11.9823	9.30624	88
chr1	74809746	74809941	PotentialPeaks_FAIRE_peak_1419	235	.	5.06174	26.5597	23.5376	95
chr1	74819678	74820050	PotentialPeaks_FAIRE_peak_1420	675	.	7.79819	71.2002	67.5249	133
chr1	74827774	74827944	PotentialPeaks_FAIRE_peak_1421	17	.	2.05828	3.90388	1.79466	13
chr1	74831150	74831302	PotentialPeaks_FAIRE_peak_1422	85	.	3.15238	11.1602	8.50921	106
chr1	74834468	74834723	PotentialPeaks_FAIRE_peak_1423	269	.	5.17285	30.0353	26.9496	120
chr1	74844008	74844330	PotentialPeaks_FAIRE_peak_1424	87	.	3.20027	11.3872	8.73053	70
chr1	74849691	74849883	PotentialPeaks_FAIRE_peak_1425	103	.	3.16395	13.0716	10.3612	115
chr1	74854749	74855041	PotentialPeaks_FAIRE_peak_1426	614	.	7.33754	65.0526	61.4614	132
chr1	74863446	74863846	PotentialPeaks_FAIRE_peak_1427	322	.	5.66822	35.4524	32.274	111
chr1	74871252	74872012	PotentialPeaks_FAIRE_peak_1428	416	.	6.16274	44.9703	41.6478	247
chr1	74897955	74898248	PotentialPeaks_FAIRE_peak_1429	197	.	4.16957	22.6509	19.7056	151
chr1	74901258	74901566	PotentialPeaks_FAIRE_peak_1430	587	.	6.4533	62.2779	58.7225	162
chr1	74905021	74905370	PotentialPeaks_FAIRE_peak_1431	443	.	5.88589	47.74	44.3781	134
chr1	74927402	74927668	PotentialPeaks_FAIRE_peak_1432	336	.	5.99513	36.8272	33.6275	116
chr1	74940141	74940320	PotentialPeaks_FAIRE_peak_1433	141	.	3.9582	16.9666	14.1516	112
chr1	74941640	74941797	PotentialPeaks_FAIRE_peak_1434	78	.	3.09838	10.5015	7.8782	73
chr1	74982089	74982274	PotentialPeaks_FAIRE_peak_1435	181	.	4.77746	21.048	18.1362	122
chr1	74995543	74995695	PotentialPeaks_FAIRE_peak_1436	60	.	2.84456	8.60357	6.05471	34
chr1	75011109	75011337	PotentialPeaks_FAIRE_peak_1437	176	.	4.44961	20.5199	17.6204	141
chr1	75063485	75063763	PotentialPeaks_FAIRE_peak_1438	309	.	6.13182	34.1451	30.989	134
chr1	75098147	75098340	PotentialPeaks_FAIRE_peak_1439	58	.	3.00803	8.35443	5.81364	141
chr1	75098724	75098957	PotentialPeaks_FAIRE_peak_1440	102	.	3.7158	12.9596	10.2517	108
chr1	75121068	75121943	PotentialPeaks_FAIRE_peak_1441	737	.	8.95719	77.4988	73.7319	488
chr1	75138882	75139057	PotentialPeaks_FAIRE_peak_1442	81	.	2.99769	10.7963	8.16004	65
chr1	75139146	75139476	PotentialPeaks_FAIRE_peak_1443	443	.	6.39051	47.6853	44.3251	134
chr1	75165071	75165711	PotentialPeaks_FAIRE_peak_1444	655	.	8.13762	69.2212	65.5728	141
chr1	75176732	75177158	PotentialPeaks_FAIRE_peak_1445	921	.	9.70411	96.1743	92.1242	258
chr1	75188446	75188952	PotentialPeaks_FAIRE_peak_1446	1540	.	12.8149	158.908	154.026	181
chr1	75195331	75195560	PotentialPeaks_FAIRE_peak_1447	16	.	2.12332	3.73258	1.63918	30
chr1	75207250	75207513	PotentialPeaks_FAIRE_peak_1448	515	.	7.20914	54.9622	51.5032	121
chr1	75215743	75215957	PotentialPeaks_FAIRE_peak_1449	80	.	3.18017	10.6682	8.03515	86
chr1	75231277	75231508	PotentialPeaks_FAIRE_peak_1450	144	.	3.75038	17.2332	14.4131	122
chr1	75232774	75233078	PotentialPeaks_FAIRE_peak_1451	120	.	3.49173	14.8565	12.0979	127
chr1	75233344	75233636	PotentialPeaks_FAIRE_peak_1452	95	.	3.20959	12.2736	9.5905	149
chr1	75248238	75248461	PotentialPeaks_FAIRE_peak_1453	203	.	4.62077	23.2918	20.333	138
chr1	75250904	75251113	PotentialPeaks_FAIRE_peak_1454	243	.	5.01594	27.3915	24.353	96
chr1	75253943	75254125	PotentialPeaks_FAIRE_peak_1455	33	.	2.49653	5.75974	3.39607	45
chr1	75259670	75259855	PotentialPeaks_FAIRE_peak_1456	130	.	4.01997	15.8627	13.0766	72
chr1	75260016	75260233	PotentialPeaks_FAIRE_peak_1457	40	.	2.65042	6.48057	4.05008	140
chr1	75260743	75260895	PotentialPeaks_FAIRE_peak_1458	70	.	3.18418	9.64364	7.0502	85
chr1	75286001	75286344	PotentialPeaks_FAIRE_peak_1459	277	.	5.19085	30.8666	27.7665	141
chr1	75287280	75287463	PotentialPeaks_FAIRE_peak_1460	95	.	3.29601	12.2731	9.59001	84
chr1	75313531	75313690	PotentialPeaks_FAIRE_peak_1461	74	.	2.51014	10.0712	7.45977	79
chr1	75313911	75314724	PotentialPeaks_FAIRE_peak_1462	1344	.	9.50882	139.133	134.431	369
chr1	75324383	75324632	PotentialPeaks_FAIRE_peak_1463	58	.	3.00803	8.35443	5.81364	114
chr1	75334738	75334919	PotentialPeaks_FAIRE_peak_1464	64	.	2.90779	9.06294	6.4929	117
chr1	75339496	75339753	PotentialPeaks_FAIRE_peak_1465	272	.	4.97489	30.3382	27.2459	148
chr1	75367865	75368035	PotentialPeaks_FAIRE_peak_1466	26	.	2.27681	4.93478	2.66893	130
chr1	75395279	75395596	PotentialPeaks_FAIRE_peak_1467	349	.	5.8667	38.1868	34.9652	187
chr1	75396460	75396758	PotentialPeaks_FAIRE_peak_1468	154	.	3.95732	18.3389	15.4913	120
chr1	75410461	75410670	PotentialPeaks_FAIRE_peak_1469	62	.	2.93841	8.82864	6.27239	119
chr1	75419583	75419751	PotentialPeaks_FAIRE_peak_1470	38	.	2.44401	6.24396	3.83846	111
chr1	75421510	75421666	PotentialPeaks_FAIRE_peak_1471	64	.	2.8569	9.01236	6.44381	50
chr1	75432362	75432857	PotentialPeaks_FAIRE_peak_1472	402	.	6.29022	43.5822	40.2802	177
chr1	75439894	75440046	PotentialPeaks_FAIRE_peak_1473	48	.	2.42824	7.3809	4.89112	23
chr1	75442430	75442623	PotentialPeaks_FAIRE_peak_1474	131	.	3.25547	15.9382	13.1506	100
chr1	75443360	75443606	PotentialPeaks_FAIRE_peak_1475	217	.	3.97183	24.7687	21.7817	111
chr1	75452563	75452804	PotentialPeaks_FAIRE_peak_1476	190	.	4.06098	21.9987	19.0675	97
chr1	75454488	75454677	PotentialPeaks_FAIRE_peak_1477	78	.	3.01385	10.4937	7.87063	40
chr1	75454941	75455332	PotentialPeaks_FAIRE_peak_1478	138	.	3.7353	16.6376	13.8324	251
chr1	75464273	75464487	PotentialPeaks_FAIRE_peak_1479	437	.	6.09489	47.0866	43.7344	71
chr1	75474080	75474261	PotentialPeaks_FAIRE_peak_1480	133	.	3.35531	16.1371	13.3454	109
chr1	75475804	75476271	PotentialPeaks_FAIRE_peak_1481	930	.	8.92042	97.0655	93.0012	252
chr1	75483973	75484164	PotentialPeaks_FAIRE_peak_1482	75	.	2.98965	10.1858	7.57125	94
chr1	75484280	75484719	PotentialPeaks_FAIRE_peak_1483	126	.	3.64271	15.3987	12.6258	308
chr1	75491825	75492084	PotentialPeaks_FAIRE_peak_1484	297	.	5.79526	32.9169	29.7805	112
chr1	75502097	75502269	PotentialPeaks_FAIRE_peak_1485	28	.	2.25392	5.19523	2.88626	109
chr1	75502891	75503135	PotentialPeaks_FAIRE_peak_1486	159	.	3.98818	18.7785	15.9227	68
chr1	75517812	75518439	PotentialPeaks_FAIRE_peak_1487	840	.	10.0365	87.9431	84.0209	264
chr1	75542883	75543184	PotentialPeaks_FAIRE_peak_1488	154	.	4.11225	18.2807	15.4341	162
chr1	75543305	75543488	PotentialPeaks_FAIRE_peak_1489	70	.	3.03224	9.61248	7.01993	102
chr1	75556101	75556413	PotentialPeaks_FAIRE_peak_1490	601	.	7.8301	63.6807	60.1071	167
chr1	75585505	75585776	PotentialPeaks_FAIRE_peak_1491	41	.	2.67133	6.55832	4.12429	106
chr1	75649197	75649424	PotentialPeaks_FAIRE_peak_1492	289	.	5.54549	32.0345	28.9129	97
chr1	75650229	75650573	PotentialPeaks_FAIRE_peak_1493	171	.	4.2828	20.0087	17.1213	126
chr1	75659332	75659518	PotentialPeaks_FAIRE_peak_1494	23	.	2.30026	4.53965	2.30247	59
chr1	75677665	75677821	PotentialPeaks_FAIRE_peak_1495	58	.	2.95388	8.33375	5.80115	87
chr1	75687602	75687754	PotentialPeaks_FAIRE_peak_1496	23	.	2.30026	4.53965	2.30247	138
chr1	75689808	75690111	PotentialPeaks_FAIRE_peak_1497	43	.	2.74262	6.82164	4.36435	67
chr1	75701443	75701662	PotentialPeaks_FAIRE_peak_1498	53	.	2.91956	7.83078	5.31581	91
chr1	75728844	75728996	PotentialPeaks_FAIRE_peak_1499	39	.	2.65415	6.3369	3.91272	72
chr1	75768287	75768460	PotentialPeaks_FAIRE_peak_1500	26	.	2.38873	4.96681	2.67217	77
chr1	75794559	75794721	PotentialPeaks_FAIRE_peak_1501	55	.	2.94145	8.09897	5.57458	40
chr1	75795346	75795545	PotentialPeaks_FAIRE_peak_1502	36	.	2.57838	6.06104	3.6646	178
chr1	75801159	75801331	PotentialPeaks_FAIRE_peak_1503	47	.	2.81676	7.26631	4.79059	135
chr1	75830047	75830199	PotentialPeaks_FAIRE_peak_1504	26	.	2.38873	4.96681	2.67217	9
chr1	75922360	75922970	PotentialPeaks_FAIRE_peak_1505	446	.	6.83024	48.0237	44.6582	177
chr1	75978623	75978786	PotentialPeaks_FAIRE_peak_1506	63	.	3.0965	8.89034	6.32549	91
chr1	75997275	75997497	PotentialPeaks_FAIRE_peak_1507	34	.	2.56567	5.86589	3.47934	81
chr1	76019743	76019984	PotentialPeaks_FAIRE_peak_1508	26	.	2.37984	4.93621	2.67016	121
chr1	76025663	76025942	PotentialPeaks_FAIRE_peak_1509	186	.	4.67222	21.574	18.653	119
chr1	76035724	76035914	PotentialPeaks_FAIRE_peak_1510	43	.	2.74262	6.82164	4.36435	91
chr1	76047789	76047941	PotentialPeaks_FAIRE_peak_1511	34	.	2.56567	5.86589	3.47934	84
chr1	76062474	76062749	PotentialPeaks_FAIRE_peak_1512	34	.	2.48205	5.84601	3.47743	130
chr1	76078348	76078563	PotentialPeaks_FAIRE_peak_1513	48	.	2.83109	7.31973	4.83219	107
chr1	76113668	76113825	PotentialPeaks_FAIRE_peak_1514	30	.	2.4772	5.40904	3.06515	23
chr1	76134707	76134975	PotentialPeaks_FAIRE_peak_1515	90	.	3.53886	11.743	9.0727	137
chr1	76242775	76242997	PotentialPeaks_FAIRE_peak_1516	48	.	2.83109	7.31973	4.83219	119
chr1	76243110	76243263	PotentialPeaks_FAIRE_peak_1517	53	.	2.91956	7.83078	5.31581	60
chr1	76444207	76444364	PotentialPeaks_FAIRE_peak_1518	53	.	2.91956	7.83078	5.31581	113
chr1	76532233	76532389	PotentialPeaks_FAIRE_peak_1519	53	.	2.91956	7.83078	5.31581	100
chr1	76572021	76572297	PotentialPeaks_FAIRE_peak_1520	58	.	3.00803	8.35443	5.81364	176
chr1	76616537	76616689	PotentialPeaks_FAIRE_peak_1521	23	.	2.30026	4.53965	2.30247	77
chr1	76673448	76673600	PotentialPeaks_FAIRE_peak_1522	34	.	2.56567	5.86589	3.47934	19
chr1	76714253	76714595	PotentialPeaks_FAIRE_peak_1523	114	.	3.89275	14.2165	11.4723	171
chr1	76916419	76916688	PotentialPeaks_FAIRE_peak_1524	58	.	3.00803	8.35443	5.81364	69
chr1	77069558	77069984	PotentialPeaks_FAIRE_peak_1525	133	.	4.15816	16.1735	13.3776	275
chr1	77070080	77070232	PotentialPeaks_FAIRE_peak_1526	30	.	2.4772	5.40904	3.06515	97
chr1	77078258	77078455	PotentialPeaks_FAIRE_peak_1527	48	.	2.70005	7.31285	4.83219	92
chr1	77262322	77262509	PotentialPeaks_FAIRE_peak_1528	51	.	2.833	7.67728	5.17642	92
chr1	77263289	77263512	PotentialPeaks_FAIRE_peak_1529	94	.	3.56587	12.0946	9.41595	155
chr1	77310986	77311239	PotentialPeaks_FAIRE_peak_1530	30	.	2.4772	5.40904	3.06515	132
chr1	77334820	77334980	PotentialPeaks_FAIRE_peak_1531	63	.	3.0965	8.89034	6.32549	51
chr1	77345149	77345301	PotentialPeaks_FAIRE_peak_1532	48	.	2.83109	7.31973	4.83219	37
chr1	77380131	77380311	PotentialPeaks_FAIRE_peak_1533	53	.	2.91956	7.83078	5.31581	52
chr1	77393052	77393297	PotentialPeaks_FAIRE_peak_1534	53	.	2.91956	7.83078	5.31581	102
chr1	77401260	77401427	PotentialPeaks_FAIRE_peak_1535	45	.	2.76114	7.05779	4.59078	44
chr1	77407078	77407408	PotentialPeaks_FAIRE_peak_1536	51	.	2.833	7.67728	5.17642	137
chr1	77425817	77426008	PotentialPeaks_FAIRE_peak_1537	68	.	3.18497	9.43818	6.85064	78
chr1	77431542	77431972	PotentialPeaks_FAIRE_peak_1538	99	.	3.59205	12.6918	9.99445	308
chr1	77438012	77438250	PotentialPeaks_FAIRE_peak_1539	109	.	3.77667	13.7294	10.9999	91
chr1	77480908	77481093	PotentialPeaks_FAIRE_peak_1540	53	.	2.91956	7.83078	5.31581	115
chr1	77491550	77492069	PotentialPeaks_FAIRE_peak_1541	494	.	6.37976	52.8951	49.4639	328
chr1	77493279	77493695	PotentialPeaks_FAIRE_peak_1542	327	.	5.13446	35.9845	32.7985	168
chr1	77499021	77499353	PotentialPeaks_FAIRE_peak_1543	195	.	4.19422	22.5034	19.5633	231
chr1	77499438	77499741	PotentialPeaks_FAIRE_peak_1544	246	.	4.7012	27.6885	24.6453	163
chr1	77509503	77509668	PotentialPeaks_FAIRE_peak_1545	49	.	2.2651	7.45207	4.95977	80
chr1	77510071	77510357	PotentialPeaks_FAIRE_peak_1546	104	.	2.84081	13.1416	10.4295	169
chr1	77511583	77511870	PotentialPeaks_FAIRE_peak_1547	297	.	4.31012	32.8668	29.7311	195
chr1	77512791	77513128	PotentialPeaks_FAIRE_peak_1548	344	.	4.66382	37.6729	34.4599	186
chr1	77542388	77542640	PotentialPeaks_FAIRE_peak_1549	108	.	3.80427	13.5831	10.857	111
chr1	77597238	77597501	PotentialPeaks_FAIRE_peak_1550	26	.	2.38873	4.96681	2.67217	49
chr1	77614138	77614395	PotentialPeaks_FAIRE_peak_1551	203	.	5.04288	23.2586	20.3004	149
chr1	77626603	77626801	PotentialPeaks_FAIRE_peak_1552	114	.	3.89275	14.2165	11.4723	98
chr1	77770300	77770552	PotentialPeaks_FAIRE_peak_1553	43	.	2.74262	6.82164	4.36435	145
chr1	77844370	77844527	PotentialPeaks_FAIRE_peak_1554	34	.	2.56567	5.86589	3.47934	58
chr1	77892926	77893079	PotentialPeaks_FAIRE_peak_1555	84	.	3.45039	11.1503	8.49965	80
chr1	77932582	77932784	PotentialPeaks_FAIRE_peak_1556	30	.	2.4772	5.40904	3.06515	71
chr1	77939779	77939979	PotentialPeaks_FAIRE_peak_1557	146	.	4.3351	17.5236	14.6947	133
chr1	77969030	77969253	PotentialPeaks_FAIRE_peak_1558	225	.	5.30829	25.5367	22.5333	105
chr1	77975323	77975566	PotentialPeaks_FAIRE_peak_1559	457	.	7.70471	49.1621	45.781	135
chr1	78106958	78107209	PotentialPeaks_FAIRE_peak_1560	56	.	2.87535	8.20133	5.67342	90
chr1	78110129	78110281	PotentialPeaks_FAIRE_peak_1561	31	.	2.4347	5.52991	3.17935	83
chr1	78119128	78119336	PotentialPeaks_FAIRE_peak_1562	23	.	2.30026	4.53965	2.30247	20
chr1	78125813	78125965	PotentialPeaks_FAIRE_peak_1563	73	.	3.27345	9.99766	7.38818	79
chr1	78135781	78136414	PotentialPeaks_FAIRE_peak_1564	176	.	3.95185	20.5081	17.6087	350
chr1	78138261	78138697	PotentialPeaks_FAIRE_peak_1565	102	.	3.14428	12.9614	10.2534	337
chr1	78164134	78164852	PotentialPeaks_FAIRE_peak_1566	248	.	4.57016	27.8701	24.824	140
chr1	78178521	78178831	PotentialPeaks_FAIRE_peak_1567	47	.	2.81299	7.2522	4.77716	163
chr1	78185709	78185968	PotentialPeaks_FAIRE_peak_1568	46	.	2.33963	7.16575	4.69448	115
chr1	78187140	78187690	PotentialPeaks_FAIRE_peak_1569	285	.	4.50942	31.6203	28.5068	238
chr1	78193599	78193918	PotentialPeaks_FAIRE_peak_1570	422	.	5.43475	45.5936	42.263	146
chr1	78194527	78194842	PotentialPeaks_FAIRE_peak_1571	44	.	2.28987	6.89275	4.43252	143
chr1	78195042	78195216	PotentialPeaks_FAIRE_peak_1572	75	.	2.68524	10.1319	7.51883	79
chr1	78200354	78200547	PotentialPeaks_FAIRE_peak_1573	72	.	2.96162	9.86408	7.26413	130
chr1	78212401	78212702	PotentialPeaks_FAIRE_peak_1574	220	.	4.7036	25.044	22.0512	168
chr1	78228982	78229204	PotentialPeaks_FAIRE_peak_1575	30	.	2.4772	5.40904	3.06515	143
chr1	78307437	78307589	PotentialPeaks_FAIRE_peak_1576	44	.	2.63844	6.90342	4.44272	104
chr1	78307711	78307907	PotentialPeaks_FAIRE_peak_1577	53	.	2.78047	7.81044	5.30455	132
chr1	78334881	78335140	PotentialPeaks_FAIRE_peak_1578	73	.	3.15729	9.94811	7.34575	127
chr1	78379866	78380094	PotentialPeaks_FAIRE_peak_1579	52	.	2.90869	7.78975	5.2846	121
chr1	78392459	78392644	PotentialPeaks_FAIRE_peak_1580	91	.	3.49628	11.8069	9.13507	55
chr1	78401328	78401496	PotentialPeaks_FAIRE_peak_1581	48	.	2.83109	7.31973	4.83219	111
chr1	78416251	78416476	PotentialPeaks_FAIRE_peak_1582	181	.	4.56377	21.0647	18.1524	97
chr1	78447476	78447679	PotentialPeaks_FAIRE_peak_1583	76	.	3.23727	10.2816	7.66447	137
chr1	78449123	78449275	PotentialPeaks_FAIRE_peak_1584	34	.	2.56302	5.85643	3.47934	68
chr1	78451313	78451565	PotentialPeaks_FAIRE_peak_1585	379	.	6.95389	41.1758	37.9097	147
chr1	78485336	78485838	PotentialPeaks_FAIRE_peak_1586	607	.	8.40672	64.353	60.7706	168
chr1	78521898	78522052	PotentialPeaks_FAIRE_peak_1587	87	.	3.45597	11.4057	8.74864	62
chr1	78533459	78533661	PotentialPeaks_FAIRE_peak_1588	256	.	5.66218	28.6734	25.6105	105
chr1	78641118	78641270	PotentialPeaks_FAIRE_peak_1589	26	.	2.38873	4.96681	2.67217	9
chr1	78645959	78646232	PotentialPeaks_FAIRE_peak_1590	73	.	3.27345	9.99766	7.38818	133
chr1	78654048	78654585	PotentialPeaks_FAIRE_peak_1591	983	.	9.75346	102.496	98.3467	310
chr1	78660781	78660933	PotentialPeaks_FAIRE_peak_1592	26	.	2.38873	4.96681	2.67217	84
chr1	78683482	78683686	PotentialPeaks_FAIRE_peak_1593	68	.	3.18497	9.43818	6.85064	125
chr1	78721086	78721348	PotentialPeaks_FAIRE_peak_1594	397	.	7.14914	43.0489	39.7552	124
chr1	78757541	78757779	PotentialPeaks_FAIRE_peak_1595	58	.	3.00803	8.35443	5.81364	108
chr1	78849034	78849309	PotentialPeaks_FAIRE_peak_1596	73	.	3.27345	9.99766	7.38818	149
chr1	78856707	78856859	PotentialPeaks_FAIRE_peak_1597	63	.	3.0965	8.89034	6.32549	86
chr1	78975358	78975546	PotentialPeaks_FAIRE_peak_1598	90	.	3.53886	11.743	9.0727	83
chr1	79397839	79398493	PotentialPeaks_FAIRE_peak_1599	90	.	3.53886	11.743	9.0727	546
chr1	79403015	79403261	PotentialPeaks_FAIRE_peak_1600	34	.	2.56567	5.86589	3.47934	141
chr1	79416203	79416405	PotentialPeaks_FAIRE_peak_1601	39	.	2.65415	6.3369	3.91272	99
chr1	79436499	79436823	PotentialPeaks_FAIRE_peak_1602	527	.	8.40479	56.2076	52.7314	173
chr1	79447047	79447312	PotentialPeaks_FAIRE_peak_1603	83	.	3.35426	10.9861	8.34468	123
chr1	79568522	79568687	PotentialPeaks_FAIRE_peak_1604	43	.	2.74262	6.82164	4.36435	126
chr1	79577353	79577636	PotentialPeaks_FAIRE_peak_1605	26	.	2.35703	4.98462	2.68884	246
chr1	79577757	79578300	PotentialPeaks_FAIRE_peak_1606	105	.	3.66158	13.2379	10.5236	369
chr1	79595531	79595723	PotentialPeaks_FAIRE_peak_1607	43	.	2.74262	6.82164	4.36435	55
chr1	79636783	79637019	PotentialPeaks_FAIRE_peak_1608	271	.	5.83912	30.2823	27.1908	105
chr1	79758220	79758488	PotentialPeaks_FAIRE_peak_1609	768	.	9.38804	80.6145	76.8024	120
chr1	79772451	79772973	PotentialPeaks_FAIRE_peak_1610	565	.	8.75868	60.1137	56.5866	149
chr1	79784903	79785070	PotentialPeaks_FAIRE_peak_1611	84	.	3.45039	11.1503	8.49965	83
chr1	79799669	79799901	PotentialPeaks_FAIRE_peak_1612	90	.	3.53886	11.743	9.0727	131
chr1	79829448	79829696	PotentialPeaks_FAIRE_peak_1613	73	.	3.27345	9.99766	7.38818	110
chr1	79871952	79872131	PotentialPeaks_FAIRE_peak_1614	34	.	2.56567	5.86589	3.47934	116
chr1	79925305	79925529	PotentialPeaks_FAIRE_peak_1615	39	.	2.65415	6.3369	3.91272	102
chr1	80029666	80029838	PotentialPeaks_FAIRE_peak_1616	47	.	2.80546	7.22408	4.75022	75
chr1	80032930	80033211	PotentialPeaks_FAIRE_peak_1617	30	.	2.4772	5.40904	3.06515	94
chr1	80149253	80149458	PotentialPeaks_FAIRE_peak_1618	30	.	2.4772	5.40904	3.06515	77
chr1	80177697	80177901	PotentialPeaks_FAIRE_peak_1619	256	.	5.66218	28.6734	25.6105	128
chr1	80227317	80227619	PotentialPeaks_FAIRE_peak_1620	34	.	2.56567	5.86589	3.47934	241
chr1	80233908	80234143	PotentialPeaks_FAIRE_peak_1621	87	.	3.39468	11.3812	8.72476	162
chr1	80337157	80337752	PotentialPeaks_FAIRE_peak_1622	823	.	9.53608	86.1965	82.3014	430
chr1	80405140	80405380	PotentialPeaks_FAIRE_peak_1623	271	.	5.83912	30.2823	27.1908	139
chr1	80440556	80440717	PotentialPeaks_FAIRE_peak_1624	39	.	2.65415	6.3369	3.91272	43
chr1	80498846	80499001	PotentialPeaks_FAIRE_peak_1625	26	.	2.38873	4.96681	2.67217	25
chr1	80502754	80502975	PotentialPeaks_FAIRE_peak_1626	58	.	3.00803	8.35443	5.81364	77
chr1	80538156	80538441	PotentialPeaks_FAIRE_peak_1627	68	.	3.18497	9.43818	6.85064	141
chr1	80627222	80627587	PotentialPeaks_FAIRE_peak_1628	43	.	2.74262	6.82164	4.36435	115
chr1	80653040	80653216	PotentialPeaks_FAIRE_peak_1629	39	.	2.65415	6.3369	3.91272	28
chr1	80719311	80719488	PotentialPeaks_FAIRE_peak_1630	84	.	3.45039	11.1503	8.49965	46
chr1	80755120	80755288	PotentialPeaks_FAIRE_peak_1631	34	.	2.56567	5.86589	3.47934	120
chr1	80827047	80827265	PotentialPeaks_FAIRE_peak_1632	79	.	3.36192	10.5685	7.93804	139
chr1	80863850	80864009	PotentialPeaks_FAIRE_peak_1633	84	.	3.45039	11.1503	8.49965	95
chr1	81072981	81073147	PotentialPeaks_FAIRE_peak_1634	39	.	2.65415	6.3369	3.91272	105
chr1	81073450	81073648	PotentialPeaks_FAIRE_peak_1635	58	.	3.00803	8.35443	5.81364	78
chr1	81073780	81073934	PotentialPeaks_FAIRE_peak_1636	79	.	3.36192	10.5685	7.93804	62
chr1	81097783	81097967	PotentialPeaks_FAIRE_peak_1637	68	.	3.18497	9.43818	6.85064	100
chr1	81283732	81284047	PotentialPeaks_FAIRE_peak_1638	90	.	3.53886	11.743	9.0727	178
chr1	81298352	81298553	PotentialPeaks_FAIRE_peak_1639	167	.	4.60052	19.6135	16.7331	96
chr1	81304151	81304317	PotentialPeaks_FAIRE_peak_1640	53	.	2.91956	7.83078	5.31581	21
chr1	81306775	81306956	PotentialPeaks_FAIRE_peak_1641	140	.	4.24663	16.8441	14.0316	109
chr1	81313247	81313508	PotentialPeaks_FAIRE_peak_1642	452	.	7.69702	48.6163	45.2421	133
chr1	81313595	81313750	PotentialPeaks_FAIRE_peak_1643	39	.	2.65415	6.3369	3.91272	37
chr1	81513265	81513454	PotentialPeaks_FAIRE_peak_1644	181	.	4.77746	21.048	18.1362	88
chr1	81517552	81517803	PotentialPeaks_FAIRE_peak_1645	233	.	5.08623	26.3236	23.3054	120
chr1	81519572	81519825	PotentialPeaks_FAIRE_peak_1646	140	.	4.24663	16.8441	14.0316	114
chr1	81574241	81574465	PotentialPeaks_FAIRE_peak_1647	84	.	3.45039	11.1503	8.49965	95
chr1	81589926	81590694	PotentialPeaks_FAIRE_peak_1648	180	.	4.41132	20.9569	18.0495	469
chr1	81624619	81624818	PotentialPeaks_FAIRE_peak_1649	43	.	2.74262	6.82164	4.36435	125
chr1	81687442	81687607	PotentialPeaks_FAIRE_peak_1650	26	.	2.38873	4.96681	2.67217	92
chr1	81733793	81733945	PotentialPeaks_FAIRE_peak_1651	38	.	2.6266	6.23696	3.83182	50
chr1	81735957	81736283	PotentialPeaks_FAIRE_peak_1652	174	.	4.68899	20.3267	17.4305	224
chr1	81741124	81741633	PotentialPeaks_FAIRE_peak_1653	174	.	4.68899	20.3267	17.4305	239
chr1	81854377	81854539	PotentialPeaks_FAIRE_peak_1654	63	.	3.0965	8.89034	6.32549	67
chr1	81962587	81962739	PotentialPeaks_FAIRE_peak_1655	39	.	2.65415	6.3369	3.91272	81
chr1	82085790	82086051	PotentialPeaks_FAIRE_peak_1656	132	.	4.05626	16.022	13.2326	99
chr1	82089974	82090162	PotentialPeaks_FAIRE_peak_1657	28	.	2.41599	5.19368	2.88477	65
chr1	82103460	82103641	PotentialPeaks_FAIRE_peak_1658	30	.	2.4772	5.40904	3.06515	64
chr1	82147373	82147631	PotentialPeaks_FAIRE_peak_1659	68	.	3.18497	9.43818	6.85064	129
chr1	82197941	82198137	PotentialPeaks_FAIRE_peak_1660	51	.	2.81867	7.62102	5.1223	81
chr1	82218181	82218333	PotentialPeaks_FAIRE_peak_1661	26	.	2.38873	4.96681	2.67217	38
chr1	82230465	82230617	PotentialPeaks_FAIRE_peak_1662	19	.	2.21179	4.12806	1.95767	7
chr1	82239882	82240175	PotentialPeaks_FAIRE_peak_1663	57	.	2.98479	8.26556	5.73535	143
chr1	82270206	82270449	PotentialPeaks_FAIRE_peak_1664	108	.	3.67939	13.5669	10.8451	118
chr1	82279785	82280128	PotentialPeaks_FAIRE_peak_1665	428	.	6.59201	46.2117	42.872	180
chr1	82280453	82280636	PotentialPeaks_FAIRE_peak_1666	43	.	2.53273	6.76355	4.3202	57
chr1	82286742	82286916	PotentialPeaks_FAIRE_peak_1667	68	.	2.63935	9.39407	6.81378	101
chr1	82287490	82287656	PotentialPeaks_FAIRE_peak_1668	43	.	2.32825	6.85764	4.39882	106
chr1	82288021	82288377	PotentialPeaks_FAIRE_peak_1669	296	.	4.77106	32.8209	29.6858	220
chr1	82289449	82289721	PotentialPeaks_FAIRE_peak_1670	263	.	4.56135	29.424	26.3496	104
chr1	82301018	82301312	PotentialPeaks_FAIRE_peak_1671	30	.	2.4772	5.40904	3.06515	74
chr1	82312860	82313321	PotentialPeaks_FAIRE_peak_1672	828	.	9.33826	86.7369	82.8337	263
chr1	82318155	82318321	PotentialPeaks_FAIRE_peak_1673	65	.	2.8508	9.16095	6.58788	51
chr1	82371513	82371759	PotentialPeaks_FAIRE_peak_1674	63	.	2.99908	8.89384	6.3288	117
chr1	82383354	82383725	PotentialPeaks_FAIRE_peak_1675	188	.	4.50665	21.7472	18.823	202
chr1	82384035	82384251	PotentialPeaks_FAIRE_peak_1676	47	.	2.68426	7.24803	4.77329	71
chr1	82386033	82386190	PotentialPeaks_FAIRE_peak_1677	64	.	2.93943	9.01835	6.44957	92
chr1	82425798	82426011	PotentialPeaks_FAIRE_peak_1678	84	.	3.33569	11.131	8.48574	147
chr1	82429962	82430231	PotentialPeaks_FAIRE_peak_1679	319	.	5.34336	35.102	31.9303	149
chr1	82442250	82442467	PotentialPeaks_FAIRE_peak_1680	16	.	2.03032	3.70903	1.63918	176
chr1	82458699	82458944	PotentialPeaks_FAIRE_peak_1681	57	.	2.90009	8.30234	5.7709	132
chr1	82471018	82471626	PotentialPeaks_FAIRE_peak_1682	283	.	5.09821	31.4227	28.3122	152
chr1	82473000	82473165	PotentialPeaks_FAIRE_peak_1683	74	.	2.88616	10.0463	7.4356	46
chr1	82473397	82473662	PotentialPeaks_FAIRE_peak_1684	100	.	3.17448	12.7162	10.0182	125
chr1	82541198	82541456	PotentialPeaks_FAIRE_peak_1685	39	.	2.65415	6.3369	3.91272	62
chr1	82551027	82551185	PotentialPeaks_FAIRE_peak_1686	79	.	3.36192	10.5685	7.93804	97
chr1	82599871	82600046	PotentialPeaks_FAIRE_peak_1687	26	.	2.38873	4.96681	2.67217	33
chr1	82613933	82614099	PotentialPeaks_FAIRE_peak_1688	34	.	2.56567	5.86589	3.47934	45
chr1	82614843	82614995	PotentialPeaks_FAIRE_peak_1689	23	.	2.30026	4.53965	2.30247	77
chr1	82638323	82638537	PotentialPeaks_FAIRE_peak_1690	167	.	4.60052	19.6135	16.7331	106
chr1	82653234	82653716	PotentialPeaks_FAIRE_peak_1691	43	.	2.74262	6.82164	4.36435	290
chr1	82670306	82670484	PotentialPeaks_FAIRE_peak_1692	84	.	3.45039	11.1503	8.49965	84
chr1	82721273	82721608	PotentialPeaks_FAIRE_peak_1693	907	.	11.0365	94.7536	90.7261	188
chr1	82721673	82721833	PotentialPeaks_FAIRE_peak_1694	32	.	2.45293	5.59785	3.24345	69
chr1	82722165	82722317	PotentialPeaks_FAIRE_peak_1695	43	.	2.69722	6.81606	4.36435	89
chr1	82783993	82784266	PotentialPeaks_FAIRE_peak_1696	246	.	5.37503	27.7262	24.6824	151
chr1	82805422	82805587	PotentialPeaks_FAIRE_peak_1697	38	.	2.63012	6.24974	3.84392	106
chr1	82835765	82836114	PotentialPeaks_FAIRE_peak_1698	539	.	7.73178	57.4643	53.9717	157
chr1	82970022	82970192	PotentialPeaks_FAIRE_peak_1699	51	.	2.87773	7.67248	5.17185	47
chr1	82984442	82984677	PotentialPeaks_FAIRE_peak_1700	153	.	4.42358	18.2118	15.3666	126
chr1	83034710	83035037	PotentialPeaks_FAIRE_peak_1701	53	.	2.91956	7.83078	5.31581	194
chr1	83035129	83035308	PotentialPeaks_FAIRE_peak_1702	68	.	3.18497	9.43818	6.85064	82
chr1	83072787	83073034	PotentialPeaks_FAIRE_peak_1703	217	.	5.21982	24.77	21.7817	99
chr1	83156158	83156373	PotentialPeaks_FAIRE_peak_1704	127	.	4.06969	15.5119	12.733	117
chr1	83313560	83313877	PotentialPeaks_FAIRE_peak_1705	153	.	4.42358	18.2118	15.3666	158
chr1	83322171	83322331	PotentialPeaks_FAIRE_peak_1706	43	.	2.74262	6.82164	4.36435	36
chr1	83385602	83385754	PotentialPeaks_FAIRE_peak_1707	43	.	2.74262	6.82164	4.36435	50
chr1	83404663	83404871	PotentialPeaks_FAIRE_peak_1708	90	.	3.53886	11.743	9.0727	81
chr1	83404959	83405111	PotentialPeaks_FAIRE_peak_1709	23	.	2.30026	4.53965	2.30247	80
chr1	83428982	83429173	PotentialPeaks_FAIRE_peak_1710	68	.	3.18497	9.43818	6.85064	105
chr1	83723850	83724037	PotentialPeaks_FAIRE_peak_1711	114	.	3.89275	14.2165	11.4723	84
chr1	83733112	83733316	PotentialPeaks_FAIRE_peak_1712	127	.	4.06969	15.5119	12.733	91
chr1	83742708	83742887	PotentialPeaks_FAIRE_peak_1713	62	.	3.0227	8.79731	6.24208	83
chr1	83745673	83745871	PotentialPeaks_FAIRE_peak_1714	108	.	3.67023	13.5267	10.8058	95
chr1	83793628	83793832	PotentialPeaks_FAIRE_peak_1715	39	.	2.65415	6.3369	3.91272	112
chr1	83826976	83827159	PotentialPeaks_FAIRE_peak_1716	73	.	3.27345	9.99766	7.38818	130
chr1	83828837	83829104	PotentialPeaks_FAIRE_peak_1717	84	.	3.45039	11.1503	8.49965	186
chr1	83858179	83858336	PotentialPeaks_FAIRE_peak_1718	47	.	2.79425	7.18211	4.71002	93
chr1	83867816	83868036	PotentialPeaks_FAIRE_peak_1719	89	.	3.51623	11.6513	8.9881	91
chr1	83895000	83895174	PotentialPeaks_FAIRE_peak_1720	43	.	2.74262	6.82164	4.36435	76
chr1	83956406	83956675	PotentialPeaks_FAIRE_peak_1721	39	.	2.65415	6.3369	3.91272	67
chr1	83967436	83967797	PotentialPeaks_FAIRE_peak_1722	39	.	2.65415	6.3369	3.91272	253
chr1	84019862	84020020	PotentialPeaks_FAIRE_peak_1723	48	.	2.83109	7.31973	4.83219	94
chr1	84040694	84040846	PotentialPeaks_FAIRE_peak_1724	48	.	2.83109	7.31973	4.83219	81
chr1	84125215	84125376	PotentialPeaks_FAIRE_peak_1725	58	.	3.00803	8.35443	5.81364	115
chr1	84173542	84173870	PotentialPeaks_FAIRE_peak_1726	73	.	3.27345	9.99766	7.38818	192
chr1	84222346	84222620	PotentialPeaks_FAIRE_peak_1727	26	.	2.38873	4.96681	2.67217	30
chr1	84281057	84281225	PotentialPeaks_FAIRE_peak_1728	97	.	3.33888	12.4796	9.78724	97
chr1	84283504	84283718	PotentialPeaks_FAIRE_peak_1729	272	.	5.44521	30.357	27.2644	98
chr1	84351122	84351338	PotentialPeaks_FAIRE_peak_1730	23	.	2.30026	4.53965	2.30247	176
chr1	84382951	84383178	PotentialPeaks_FAIRE_peak_1731	43	.	2.74262	6.82164	4.36435	59
chr1	84476647	84476811	PotentialPeaks_FAIRE_peak_1732	34	.	2.56567	5.86589	3.47934	61
chr1	84503501	84503693	PotentialPeaks_FAIRE_peak_1733	48	.	2.83109	7.31973	4.83219	120
chr1	84558882	84559034	PotentialPeaks_FAIRE_peak_1734	68	.	3.18497	9.43818	6.85064	91
chr1	84578518	84578681	PotentialPeaks_FAIRE_peak_1735	41	.	2.67485	6.57138	4.13681	101
chr1	84582072	84582281	PotentialPeaks_FAIRE_peak_1736	83	.	3.36719	11.0397	8.39695	97
chr1	84585647	84585845	PotentialPeaks_FAIRE_peak_1737	26	.	2.38873	4.96681	2.67217	129
chr1	84609756	84609936	PotentialPeaks_FAIRE_peak_1738	138	.	4.14076	16.6798	13.8738	76
chr1	84617947	84618112	PotentialPeaks_FAIRE_peak_1739	65	.	3.0635	9.1572	6.58426	109
chr1	84657943	84658095	PotentialPeaks_FAIRE_peak_1740	30	.	2.34727	5.32762	3.01028	89
chr1	84661085	84661238	PotentialPeaks_FAIRE_peak_1741	42	.	2.65959	6.67271	4.23359	95
chr1	84661293	84661569	PotentialPeaks_FAIRE_peak_1742	50	.	2.80447	7.56521	5.06858	198
chr1	84692301	84693028	PotentialPeaks_FAIRE_peak_1743	125	.	3.67813	15.3265	12.5551	612
chr1	84693911	84694105	PotentialPeaks_FAIRE_peak_1744	214	.	4.84868	24.4431	21.4626	107
chr1	84835261	84835456	PotentialPeaks_FAIRE_peak_1745	55	.	2.66163	8.10233	5.57783	45
chr1	84835824	84836550	PotentialPeaks_FAIRE_peak_1746	306	.	5.3075	33.7609	30.6104	307
chr1	84836904	84837094	PotentialPeaks_FAIRE_peak_1747	34	.	2.32095	5.8397	3.47164	92
chr1	84878809	84878986	PotentialPeaks_FAIRE_peak_1748	73	.	3.27345	9.99766	7.38818	34
chr1	84886658	84886981	PotentialPeaks_FAIRE_peak_1749	120	.	3.98122	14.8595	12.0979	111
chr1	84925421	84925750	PotentialPeaks_FAIRE_peak_1750	58	.	3.00803	8.35443	5.81364	224
chr1	84931325	84931529	PotentialPeaks_FAIRE_peak_1751	79	.	3.20441	10.5658	7.93804	77
chr1	84931672	84931933	PotentialPeaks_FAIRE_peak_1752	172	.	4.44568	20.1876	17.2968	131
chr1	85081417	85081702	PotentialPeaks_FAIRE_peak_1753	434	.	7.52008	46.7669	43.4187	150
chr1	85082943	85083311	PotentialPeaks_FAIRE_peak_1754	240	.	5.48523	27.0912	24.0585	133
chr1	85083615	85083786	PotentialPeaks_FAIRE_peak_1755	79	.	3.36192	10.5685	7.93804	133
chr1	85087236	85087499	PotentialPeaks_FAIRE_peak_1756	232	.	5.39676	26.3104	23.2925	123
chr1	85251812	85252051	PotentialPeaks_FAIRE_peak_1757	232	.	5.39676	26.3104	23.2925	116
chr1	85252167	85252319	PotentialPeaks_FAIRE_peak_1758	96	.	3.62733	12.3462	9.65687	105
chr1	85254861	85255044	PotentialPeaks_FAIRE_peak_1759	108	.	3.80427	13.5831	10.857	62
chr1	85260509	85260661	PotentialPeaks_FAIRE_peak_1760	120	.	3.98122	14.8595	12.0979	20
chr1	85270345	85270500	PotentialPeaks_FAIRE_peak_1761	33	.	2.40907	5.69872	3.33856	42
chr1	85270553	85270853	PotentialPeaks_FAIRE_peak_1762	150	.	3.97393	17.8729	15.0373	72
chr1	85273440	85273727	PotentialPeaks_FAIRE_peak_1763	270	.	4.87729	30.1006	27.0138	119
chr1	85274273	85274614	PotentialPeaks_FAIRE_peak_1764	1031	.	10.3761	107.332	103.106	203
chr1	85276949	85277268	PotentialPeaks_FAIRE_peak_1765	211	.	4.65799	24.1405	21.1651	88
chr1	85289126	85289287	PotentialPeaks_FAIRE_peak_1766	90	.	3.53886	11.743	9.0727	36
chr1	87481560	87481721	PotentialPeaks_FAIRE_peak_1767	90	.	3.53886	11.743	9.0727	33
chr1	87481777	87482016	PotentialPeaks_FAIRE_peak_1768	73	.	3.27345	9.99766	7.38818	115
chr1	87487624	87488185	PotentialPeaks_FAIRE_peak_1769	433	.	4.29937	46.6505	43.3051	358
chr1	87488337	87488618	PotentialPeaks_FAIRE_peak_1770	280	.	3.53774	31.1286	28.0224	142
chr1	87488700	87490002	PotentialPeaks_FAIRE_peak_1771	704	.	5.40235	74.209	70.4907	985
chr1	87500781	87500997	PotentialPeaks_FAIRE_peak_1772	195	.	4.9544	22.5141	19.5711	89
chr1	87511214	87511428	PotentialPeaks_FAIRE_peak_1773	108	.	3.80427	13.5831	10.857	101
chr1	87521013	87521165	PotentialPeaks_FAIRE_peak_1774	90	.	3.53886	11.743	9.0727	123
chr1	87521593	87521848	PotentialPeaks_FAIRE_peak_1775	320	.	6.36995	35.262	32.0863	135
chr1	87522786	87522970	PotentialPeaks_FAIRE_peak_1776	96	.	3.62733	12.3462	9.65687	75
chr1	87592537	87592721	PotentialPeaks_FAIRE_peak_1777	34	.	2.56567	5.86589	3.47934	94
chr1	87602006	87602159	PotentialPeaks_FAIRE_peak_1778	34	.	2.56567	5.86589	3.47934	79
chr1	87616730	87616938	PotentialPeaks_FAIRE_peak_1779	73	.	3.27345	9.99766	7.38818	110
chr1	87633123	87633370	PotentialPeaks_FAIRE_peak_1780	508	.	7.80455	54.2672	50.8179	122
chr1	87639559	87639907	PotentialPeaks_FAIRE_peak_1781	220	.	5.19766	25.0376	22.045	105
chr1	87689840	87690111	PotentialPeaks_FAIRE_peak_1782	457	.	7.03078	49.1414	45.7605	131
chr1	87690937	87691338	PotentialPeaks_FAIRE_peak_1783	146	.	3.94569	17.4547	14.6303	151
chr1	87749981	87750180	PotentialPeaks_FAIRE_peak_1784	242	.	5.28828	27.3104	24.2744	88
chr1	87761030	87761286	PotentialPeaks_FAIRE_peak_1785	853	.	11.2359	89.2703	85.3277	143
chr1	87790936	87791244	PotentialPeaks_FAIRE_peak_1786	339	.	5.69283	37.1848	33.9785	183
chr1	87791703	87791880	PotentialPeaks_FAIRE_peak_1787	67	.	2.83928	9.28223	6.70544	120
chr1	87792160	87792369	PotentialPeaks_FAIRE_peak_1788	43	.	2.48907	6.85573	4.39694	110
chr1	87813481	87813971	PotentialPeaks_FAIRE_peak_1789	161	.	4.20139	19.0092	16.143	325
chr1	87824968	87825178	PotentialPeaks_FAIRE_peak_1790	91	.	3.20013	11.806	9.13428	151
chr1	87830394	87830686	PotentialPeaks_FAIRE_peak_1791	65	.	2.80816	9.13246	6.5603	164
chr1	87904486	87904723	PotentialPeaks_FAIRE_peak_1792	452	.	7.69702	48.6163	45.2421	111
chr1	87914839	87914999	PotentialPeaks_FAIRE_peak_1793	48	.	2.83109	7.31973	4.83219	110
chr1	87928946	87929277	PotentialPeaks_FAIRE_peak_1794	126	.	3.85264	15.3834	12.6107	142
chr1	87942390	87942565	PotentialPeaks_FAIRE_peak_1795	46	.	2.73231	7.11432	4.64497	106
chr1	87956088	87956328	PotentialPeaks_FAIRE_peak_1796	264	.	4.95832	29.5392	26.461	121
chr1	87960750	87961325	PotentialPeaks_FAIRE_peak_1797	873	.	9.89462	91.3624	87.3884	219
chr1	87968450	87968725	PotentialPeaks_FAIRE_peak_1798	26	.	2.38873	4.96681	2.67217	206
chr1	88050990	88051459	PotentialPeaks_FAIRE_peak_1799	1347	.	12.9882	139.476	134.769	323
chr1	88075480	88075759	PotentialPeaks_FAIRE_peak_1800	450	.	6.98042	48.3903	45.02	129
chr1	88102059	88102469	PotentialPeaks_FAIRE_peak_1801	39	.	2.62984	6.40379	3.97677	117
chr1	88110784	88111104	PotentialPeaks_FAIRE_peak_1802	292	.	5.53188	32.3517	29.2254	140
chr1	88114703	88114868	PotentialPeaks_FAIRE_peak_1803	41	.	2.58533	6.53795	4.10485	57
chr1	88199623	88199860	PotentialPeaks_FAIRE_peak_1804	77	.	2.99853	10.4191	7.79804	96
chr1	88207341	88207735	PotentialPeaks_FAIRE_peak_1805	62	.	2.92804	8.78461	6.22976	295
chr1	88236081	88236325	PotentialPeaks_FAIRE_peak_1806	369	.	6.84747	40.2062	36.9545	104
chr1	88255536	88255744	PotentialPeaks_FAIRE_peak_1807	225	.	4.34774	25.5333	22.5323	81
chr1	88255867	88256344	PotentialPeaks_FAIRE_peak_1808	1470	.	12.2316	151.88	147.046	208
chr1	88268646	88268865	PotentialPeaks_FAIRE_peak_1809	240	.	5.48523	27.0912	24.0585	90
chr1	88285870	88286172	PotentialPeaks_FAIRE_peak_1810	148	.	4.17363	17.7021	14.8698	182
chr1	88311497	88311649	PotentialPeaks_FAIRE_peak_1811	30	.	2.4772	5.40904	3.06515	25
chr1	88312952	88313109	PotentialPeaks_FAIRE_peak_1812	91	.	3.5054	11.8447	9.1721	73
chr1	88321479	88321634	PotentialPeaks_FAIRE_peak_1813	25	.	2.25075	4.83546	2.57716	117
chr1	88326599	88326802	PotentialPeaks_FAIRE_peak_1814	231	.	4.21956	26.2027	23.1886	96
chr1	88330648	88330813	PotentialPeaks_FAIRE_peak_1815	36	.	2.13576	6.03796	3.64269	95
chr1	88330980	88331319	PotentialPeaks_FAIRE_peak_1816	840	.	7.65545	87.9778	84.0551	143
chr1	88332007	88332258	PotentialPeaks_FAIRE_peak_1817	39	.	2.16571	6.4159	3.98843	192
chr1	88337012	88337400	PotentialPeaks_FAIRE_peak_1818	346	.	4.69217	37.9059	34.6882	259
chr1	88338736	88338997	PotentialPeaks_FAIRE_peak_1819	86	.	2.72199	11.3279	8.67279	148
chr1	88339194	88339384	PotentialPeaks_FAIRE_peak_1820	54	.	2.36623	7.94475	5.42585	48
chr1	88339518	88339804	PotentialPeaks_FAIRE_peak_1821	41	.	2.21038	6.56369	4.12945	169
chr1	88377576	88377872	PotentialPeaks_FAIRE_peak_1822	26	.	2.34798	4.95241	2.67217	150
chr1	88383847	88384469	PotentialPeaks_FAIRE_peak_1823	915	.	8.24953	95.6125	91.5719	201
chr1	88396501	88396740	PotentialPeaks_FAIRE_peak_1824	104	.	2.86396	13.1256	10.4139	113
chr1	88398290	88398478	PotentialPeaks_FAIRE_peak_1825	140	.	3.17854	16.8828	14.0695	78
chr1	88400583	88401037	PotentialPeaks_FAIRE_peak_1826	624	.	6.37181	66.0165	62.4124	220
chr1	88406034	88406377	PotentialPeaks_FAIRE_peak_1827	504	.	6.88484	53.9424	50.4971	146
chr1	88421806	88422151	PotentialPeaks_FAIRE_peak_1828	653	.	5.68677	69.0021	65.357	171
chr1	88422774	88423331	PotentialPeaks_FAIRE_peak_1829	832	.	6.54126	87.2063	83.295	376
chr1	88428994	88429283	PotentialPeaks_FAIRE_peak_1830	447	.	6.25297	48.1216	44.7549	143
chr1	88478882	88479581	PotentialPeaks_FAIRE_peak_1831	788	.	8.79703	82.6928	78.8496	281
chr1	88483297	88483769	PotentialPeaks_FAIRE_peak_1832	56	.	2.68289	8.20272	5.67478	395
chr1	88495142	88495363	PotentialPeaks_FAIRE_peak_1833	132	.	4.00645	16.0824	13.2918	125
chr1	88498222	88498381	PotentialPeaks_FAIRE_peak_1834	53	.	2.91956	7.83078	5.31581	98
chr1	88515116	88515328	PotentialPeaks_FAIRE_peak_1835	189	.	4.46409	21.8488	18.9202	79
chr1	88546884	88547171	PotentialPeaks_FAIRE_peak_1836	313	.	5.78354	34.4755	31.3129	143
chr1	88549332	88549484	PotentialPeaks_FAIRE_peak_1837	52	.	2.69077	7.75753	5.25365	101
chr1	88557125	88557344	PotentialPeaks_FAIRE_peak_1838	60	.	3.01602	8.57775	6.0297	115
chr1	88566039	88566375	PotentialPeaks_FAIRE_peak_1839	232	.	4.52175	26.2893	23.2738	195
chr1	88566982	88567298	PotentialPeaks_FAIRE_peak_1840	289	.	5.01994	32.0227	28.9013	175
chr1	88600038	88600806	PotentialPeaks_FAIRE_peak_1841	389	.	6.36888	42.2816	38.998	313
chr1	88615962	88616129	PotentialPeaks_FAIRE_peak_1842	48	.	2.83109	7.31973	4.83219	63
chr1	88770348	88770605	PotentialPeaks_FAIRE_peak_1843	174	.	4.68899	20.3267	17.4305	121
chr1	88814513	88814747	PotentialPeaks_FAIRE_peak_1844	63	.	3.0965	8.89034	6.32549	119
chr1	88864938	88865142	PotentialPeaks_FAIRE_peak_1845	53	.	2.91956	7.83078	5.31581	137
chr1	88889352	88889819	PotentialPeaks_FAIRE_peak_1846	346	.	6.0346	37.8755	34.6581	181
chr1	88899164	88900249	PotentialPeaks_FAIRE_peak_1847	262	.	4.59501	29.3232	26.2504	419
chr1	88932137	88932688	PotentialPeaks_FAIRE_peak_1848	81	.	2.89082	10.7907	8.15453	193
chr1	88937768	88937942	PotentialPeaks_FAIRE_peak_1849	130	.	3.45691	15.8349	13.0495	99
chr1	88938713	88939108	PotentialPeaks_FAIRE_peak_1850	380	.	5.78157	41.337	38.0687	142
chr1	89039018	89039322	PotentialPeaks_FAIRE_peak_1851	58	.	3.00803	8.35443	5.81364	237
chr1	89070969	89071149	PotentialPeaks_FAIRE_peak_1852	98	.	3.27172	12.588	9.89312	60
chr1	89083632	89083903	PotentialPeaks_FAIRE_peak_1853	496	.	7.13776	53.0947	49.661	130
chr1	89110292	89110636	PotentialPeaks_FAIRE_peak_1854	767	.	8.90181	80.5534	76.7422	203
chr1	89142783	89143091	PotentialPeaks_FAIRE_peak_1855	287	.	5.83265	31.8819	28.7645	149
chr1	89167321	89167500	PotentialPeaks_FAIRE_peak_1856	68	.	3.18497	9.43818	6.85064	97
chr1	89189549	89189701	PotentialPeaks_FAIRE_peak_1857	34	.	2.56567	5.86589	3.47934	106
chr1	89223280	89223688	PotentialPeaks_FAIRE_peak_1858	1174	.	12.5225	121.879	117.42	216
chr1	89344177	89344370	PotentialPeaks_FAIRE_peak_1859	141	.	4.1451	16.9893	14.1739	61
chr1	89407081	89407233	PotentialPeaks_FAIRE_peak_1860	43	.	2.74262	6.82164	4.36435	74
chr1	89417536	89417724	PotentialPeaks_FAIRE_peak_1861	45	.	2.7395	6.97621	4.51259	142
chr1	89518287	89518439	PotentialPeaks_FAIRE_peak_1862	63	.	3.0965	8.89034	6.32549	79
chr1	89532943	89533143	PotentialPeaks_FAIRE_peak_1863	53	.	2.82648	7.82623	5.31581	106
chr1	89589897	89590105	PotentialPeaks_FAIRE_peak_1864	34	.	2.56567	5.86589	3.47934	104
chr1	89618102	89618281	PotentialPeaks_FAIRE_peak_1865	33	.	2.51553	5.68651	3.32706	67
chr1	89652366	89652749	PotentialPeaks_FAIRE_peak_1866	1291	.	13.6185	133.802	129.17	147
chr1	89749618	89749849	PotentialPeaks_FAIRE_peak_1867	311	.	5.82867	34.3054	31.1469	128
chr1	89754893	89755065	PotentialPeaks_FAIRE_peak_1868	58	.	3.00803	8.35443	5.81364	120
chr1	89778358	89778520	PotentialPeaks_FAIRE_peak_1869	50	.	2.84742	7.55714	5.06075	34
chr1	89904710	89905256	PotentialPeaks_FAIRE_peak_1870	248	.	5.57371	27.8789	24.8305	440
chr1	90108483	90108761	PotentialPeaks_FAIRE_peak_1871	40	.	2.40031	6.45084	4.02174	246
chr1	90109209	90109361	PotentialPeaks_FAIRE_peak_1872	31	.	2.24798	5.51572	3.16596	6
chr1	90174002	90174441	PotentialPeaks_FAIRE_peak_1873	2424	.	11.7692	247.462	242.424	212
chr1	90198922	90199158	PotentialPeaks_FAIRE_peak_1874	86	.	3.14511	11.3302	8.67498	95
chr1	90215251	90215440	PotentialPeaks_FAIRE_peak_1875	119	.	3.76949	14.7387	11.9833	97
chr1	90242314	90242568	PotentialPeaks_FAIRE_peak_1876	63	.	3.0965	8.89034	6.32549	73
chr1	90254098	90254375	PotentialPeaks_FAIRE_peak_1877	303	.	5.66944	33.473	30.3284	81
chr1	90268229	90268516	PotentialPeaks_FAIRE_peak_1878	43	.	2.74262	6.82164	4.36435	240
chr1	90295803	90296027	PotentialPeaks_FAIRE_peak_1879	57	.	2.9808	8.25026	5.72053	134
chr1	90302724	90302896	PotentialPeaks_FAIRE_peak_1880	34	.	2.39893	5.78974	3.42442	64
chr1	90321286	90321540	PotentialPeaks_FAIRE_peak_1881	382	.	6.08994	41.5566	38.2841	138
chr1	90353356	90353576	PotentialPeaks_FAIRE_peak_1882	206	.	4.97299	23.6502	20.6855	102
chr1	90374876	90375047	PotentialPeaks_FAIRE_peak_1883	59	.	2.63697	8.45099	5.90705	111
chr1	90422717	90423111	PotentialPeaks_FAIRE_peak_1884	68	.	3.18497	9.43818	6.85064	150
chr1	90458960	90459211	PotentialPeaks_FAIRE_peak_1885	155	.	3.91152	18.3688	15.5206	139
chr1	90479856	90480008	PotentialPeaks_FAIRE_peak_1886	26	.	2.35099	4.96312	2.67217	97
chr1	90497625	90497783	PotentialPeaks_FAIRE_peak_1887	39	.	2.65415	6.3369	3.91272	42
chr1	90535922	90536191	PotentialPeaks_FAIRE_peak_1888	32	.	2.37631	5.56893	3.21609	127
chr1	90536591	90536918	PotentialPeaks_FAIRE_peak_1889	77	.	3.11891	10.3937	7.77341	147
chr1	90540045	90540308	PotentialPeaks_FAIRE_peak_1890	27	.	2.24169	5.03012	2.73155	65
chr1	90548344	90548502	PotentialPeaks_FAIRE_peak_1891	53	.	2.86948	7.8199	5.31368	131
chr1	90565428	90565697	PotentialPeaks_FAIRE_peak_1892	167	.	4.40363	19.6774	16.7959	139
chr1	90597540	90597711	PotentialPeaks_FAIRE_peak_1893	28	.	2.06767	5.18155	2.87356	96
chr1	90598636	90599055	PotentialPeaks_FAIRE_peak_1894	230	.	4.03442	26.0553	23.0437	131
chr1	90602436	90602745	PotentialPeaks_FAIRE_peak_1895	362	.	5.22591	39.5392	36.2977	141
chr1	90617525	90617750	PotentialPeaks_FAIRE_peak_1896	34	.	2.52864	5.87833	3.49106	87
chr1	90632211	90632364	PotentialPeaks_FAIRE_peak_1897	26	.	2.38873	4.96681	2.67217	126
chr1	90639061	90639252	PotentialPeaks_FAIRE_peak_1898	204	.	4.45675	23.3825	20.4224	113
chr1	90641844	90642106	PotentialPeaks_FAIRE_peak_1899	359	.	5.82236	39.1536	35.9174	130
chr1	90648930	90649273	PotentialPeaks_FAIRE_peak_1900	219	.	4.62037	24.9214	21.9306	124
chr1	90697182	90697348	PotentialPeaks_FAIRE_peak_1901	46	.	2.72542	7.08759	4.61933	71
chr1	90709703	90710112	PotentialPeaks_FAIRE_peak_1902	222	.	4.79786	25.2069	22.2114	271
chr1	90735296	90735537	PotentialPeaks_FAIRE_peak_1903	154	.	4.05741	18.2944	15.4476	115
chr1	90736567	90737076	PotentialPeaks_FAIRE_peak_1904	95	.	3.24797	12.2541	9.5715	298
chr1	90744216	90744655	PotentialPeaks_FAIRE_peak_1905	272	.	5.22299	30.31	27.2181	149
chr1	90764566	90764718	PotentialPeaks_FAIRE_peak_1906	36	.	2.53469	6.04599	3.65041	56
chr1	90805332	90805505	PotentialPeaks_FAIRE_peak_1907	45	.	2.75751	7.04412	4.57772	34
chr1	90820799	90821146	PotentialPeaks_FAIRE_peak_1908	131	.	3.74079	15.8944	13.1077	147
chr1	90835097	90835295	PotentialPeaks_FAIRE_peak_1909	30	.	2.40786	5.42958	3.08459	132
chr1	90929692	90929852	PotentialPeaks_FAIRE_peak_1910	49	.	2.76618	7.41401	4.92301	90
chr1	90966504	90967087	PotentialPeaks_FAIRE_peak_1911	721	.	6.77728	75.8966	72.1535	311
chr1	90968834	90969006	PotentialPeaks_FAIRE_peak_1912	39	.	2.11746	6.33621	3.91272	108
chr1	90989211	90989593	PotentialPeaks_FAIRE_peak_1913	91	.	3.19349	11.7735	9.10245	277
chr1	90992102	90992384	PotentialPeaks_FAIRE_peak_1914	48	.	2.83109	7.31973	4.83219	121
chr1	90999194	90999703	PotentialPeaks_FAIRE_peak_1915	79	.	3.36192	10.5685	7.93804	322
chr1	91004968	91005280	PotentialPeaks_FAIRE_peak_1916	31	.	2.27213	5.5057	3.15653	293
chr1	91080061	91080355	PotentialPeaks_FAIRE_peak_1917	98	.	3.35707	12.5668	9.87245	143
chr1	91088113	91088319	PotentialPeaks_FAIRE_peak_1918	109	.	3.43652	13.6382	10.9108	99
chr1	91092730	91093071	PotentialPeaks_FAIRE_peak_1919	196	.	4.90536	22.6435	19.6983	111
chr1	91104013	91104193	PotentialPeaks_FAIRE_peak_1920	63	.	3.0965	8.89034	6.32549	139
chr1	91130011	91130225	PotentialPeaks_FAIRE_peak_1921	26	.	2.22741	4.97246	2.6775	90
chr1	91131965	91132245	PotentialPeaks_FAIRE_peak_1922	183	.	4.23671	21.2645	18.3488	130
chr1	91141848	91142022	PotentialPeaks_FAIRE_peak_1923	43	.	2.74262	6.82164	4.36435	71
chr1	91151236	91151509	PotentialPeaks_FAIRE_peak_1924	73	.	3.27345	9.99766	7.38818	82
chr1	91167630	91167782	PotentialPeaks_FAIRE_peak_1925	40	.	2.60346	6.45743	4.02793	111
chr1	91168981	91169181	PotentialPeaks_FAIRE_peak_1926	63	.	3.03828	8.8595	6.3023	101
chr1	91230489	91230641	PotentialPeaks_FAIRE_peak_1927	41	.	2.67485	6.57138	4.13681	73
chr1	91241247	91241399	PotentialPeaks_FAIRE_peak_1928	43	.	2.74262	6.82164	4.36435	127
chr1	91291334	91291502	PotentialPeaks_FAIRE_peak_1929	25	.	2.30377	4.79447	2.53908	119
chr1	91297217	91297783	PotentialPeaks_FAIRE_peak_1930	437	.	6.43849	47.0962	43.7438	276
chr1	91326785	91327230	PotentialPeaks_FAIRE_peak_1931	63	.	2.91263	8.9018	6.3366	261
chr1	91337978	91338152	PotentialPeaks_FAIRE_peak_1932	52	.	2.71988	7.72171	5.21909	51
chr1	91351143	91351451	PotentialPeaks_FAIRE_peak_1933	390	.	5.81724	42.3746	39.0899	151
chr1	91376525	91376751	PotentialPeaks_FAIRE_peak_1934	37	.	2.49871	6.19259	3.7896	111
chr1	91406744	91406910	PotentialPeaks_FAIRE_peak_1935	49	.	2.69473	7.45238	4.95997	90
chr1	91414380	91414762	PotentialPeaks_FAIRE_peak_1936	315	.	4.99208	34.6716	31.5062	164
chr1	91421010	91421267	PotentialPeaks_FAIRE_peak_1937	301	.	5.04799	33.2648	30.1233	109
chr1	91422549	91422725	PotentialPeaks_FAIRE_peak_1938	107	.	3.23925	13.49	10.7699	121
chr1	91437885	91438037	PotentialPeaks_FAIRE_peak_1939	48	.	2.70324	7.32589	4.83809	126
chr1	91446612	91446965	PotentialPeaks_FAIRE_peak_1940	124	.	3.61241	15.244	12.4743	110
chr1	91447079	91447231	PotentialPeaks_FAIRE_peak_1941	31	.	2.3054	5.52869	3.17825	63
chr1	91473593	91473952	PotentialPeaks_FAIRE_peak_1942	192	.	4.14353	22.2054	19.2707	250
chr1	91476602	91476785	PotentialPeaks_FAIRE_peak_1943	96	.	3.09942	12.3088	9.62494	110
chr1	91477920	91478088	PotentialPeaks_FAIRE_peak_1944	112	.	3.2902	13.988	11.2528	101
chr1	91484570	91484722	PotentialPeaks_FAIRE_peak_1945	32	.	2.45906	5.62068	3.26495	118
chr1	91503242	91503436	PotentialPeaks_FAIRE_peak_1946	103	.	3.51144	13.0592	10.3489	82
chr1	91524313	91524465	PotentialPeaks_FAIRE_peak_1947	63	.	2.95584	8.90255	6.33729	82
chr1	91543269	91543529	PotentialPeaks_FAIRE_peak_1948	223	.	4.88781	25.3281	22.3305	123
chr1	91571299	91571547	PotentialPeaks_FAIRE_peak_1949	33	.	2.37522	5.69323	3.33342	138
chr1	91585395	91585813	PotentialPeaks_FAIRE_peak_1950	74	.	3.05657	10.1116	7.49925	335
chr1	91600018	91600226	PotentialPeaks_FAIRE_peak_1951	164	.	3.98764	19.3311	16.4589	130
chr1	91620752	91620917	PotentialPeaks_FAIRE_peak_1952	53	.	2.75698	7.88037	5.36368	79
chr1	91631089	91631263	PotentialPeaks_FAIRE_peak_1953	79	.	3.25433	10.5671	7.93804	41
chr1	91647241	91647424	PotentialPeaks_FAIRE_peak_1954	46	.	2.65014	7.10753	4.6386	111
chr1	91647478	91647991	PotentialPeaks_FAIRE_peak_1955	268	.	5.36361	29.9378	26.8536	284
chr1	91654250	91654471	PotentialPeaks_FAIRE_peak_1956	34	.	2.56567	5.86589	3.47934	181
chr1	91660611	91660807	PotentialPeaks_FAIRE_peak_1957	88	.	3.42061	11.4905	8.8313	109
chr1	91708887	91709053	PotentialPeaks_FAIRE_peak_1958	40	.	2.60346	6.45743	4.02793	38
chr1	91713093	91713389	PotentialPeaks_FAIRE_peak_1959	37	.	2.51903	6.13035	3.73052	69
chr1	91745145	91745480	PotentialPeaks_FAIRE_peak_1960	80	.	3.04497	10.6447	8.0123	69
chr1	91755892	91756080	PotentialPeaks_FAIRE_peak_1961	62	.	2.88632	8.78689	6.23197	100
chr1	91767925	91768150	PotentialPeaks_FAIRE_peak_1962	38	.	2.47987	6.2565	3.85031	140
chr1	91773323	91773531	PotentialPeaks_FAIRE_peak_1963	70	.	2.83973	9.63517	7.04197	83
chr1	91782512	91782876	PotentialPeaks_FAIRE_peak_1964	63	.	2.8328	8.90152	6.33639	253
chr1	91788873	91789222	PotentialPeaks_FAIRE_peak_1965	121	.	3.60422	14.9564	12.1927	103
chr1	91809047	91809440	PotentialPeaks_FAIRE_peak_1966	96	.	3.62733	12.3462	9.65687	107
chr1	91822262	91822594	PotentialPeaks_FAIRE_peak_1967	87	.	2.86899	11.3833	8.72677	237
chr1	91827692	91827990	PotentialPeaks_FAIRE_peak_1968	429	.	5.06534	46.246	42.906	136
chr1	91829276	91829543	PotentialPeaks_FAIRE_peak_1969	233	.	3.89493	26.3752	23.3562	123
chr1	91831356	91831562	PotentialPeaks_FAIRE_peak_1970	92	.	2.76559	11.945	9.26984	83
chr1	91837050	91837275	PotentialPeaks_FAIRE_peak_1971	169	.	3.71105	19.8202	16.9362	133
chr1	91838115	91838267	PotentialPeaks_FAIRE_peak_1972	39	.	2.29947	6.34585	3.92132	96
chr1	91838770	91838980	PotentialPeaks_FAIRE_peak_1973	90	.	2.98277	11.6661	9.00253	153
chr1	91839890	91840093	PotentialPeaks_FAIRE_peak_1974	264	.	4.67077	29.4867	26.4093	119
chr1	91848992	91849148	PotentialPeaks_FAIRE_peak_1975	63	.	3.0965	8.89034	6.32549	127
chr1	91858753	91859253	PotentialPeaks_FAIRE_peak_1976	84	.	3.08714	11.0473	8.40431	305
chr1	91861193	91861352	PotentialPeaks_FAIRE_peak_1977	51	.	2.57491	7.68965	5.18834	100
chr1	91898814	91898969	PotentialPeaks_FAIRE_peak_1978	38	.	2.54656	6.23741	3.83219	44
chr1	91946732	91947096	PotentialPeaks_FAIRE_peak_1979	71	.	2.82663	9.74364	7.14735	85
chr1	91947987	91948223	PotentialPeaks_FAIRE_peak_1980	64	.	2.75277	9.03091	6.46185	101
chr1	91957256	91957453	PotentialPeaks_FAIRE_peak_1981	281	.	5.39737	31.2515	28.1435	113
chr1	91998468	91998648	PotentialPeaks_FAIRE_peak_1982	35	.	2.4803	5.97904	3.58671	64
chr1	92000000	92000159	PotentialPeaks_FAIRE_peak_1983	63	.	3.0965	8.89034	6.32549	53
chr1	92015746	92016008	PotentialPeaks_FAIRE_peak_1984	59	.	2.91263	8.53621	5.98952	129
chr1	92050013	92050478	PotentialPeaks_FAIRE_peak_1985	180	.	4.18094	20.9604	18.0528	120
chr1	92061577	92061732	PotentialPeaks_FAIRE_peak_1986	66	.	2.94371	9.22263	6.64765	70
chr1	92085641	92086082	PotentialPeaks_FAIRE_peak_1987	71	.	3.11877	9.78598	7.18837	135
chr1	92099059	92099323	PotentialPeaks_FAIRE_peak_1988	64	.	2.60545	9.05011	6.48039	167
chr1	92100407	92100671	PotentialPeaks_FAIRE_peak_1989	332	.	4.94799	36.4704	33.276	136
chr1	92101923	92102180	PotentialPeaks_FAIRE_peak_1990	156	.	3.4793	18.5437	15.6923	167
chr1	92118511	92119478	PotentialPeaks_FAIRE_peak_1991	203	.	4.03964	23.2777	20.3192	289
chr1	92164859	92165104	PotentialPeaks_FAIRE_peak_1992	78	.	3.18542	10.483	7.86024	121
chr1	92186923	92187075	PotentialPeaks_FAIRE_peak_1993	27	.	2.22151	5.06098	2.76042	79
chr1	92187533	92187718	PotentialPeaks_FAIRE_peak_1994	27	.	2.22151	5.06098	2.76042	143
chr1	92231728	92231940	PotentialPeaks_FAIRE_peak_1995	49	.	2.62276	7.45636	4.96376	95
chr1	92250144	92250296	PotentialPeaks_FAIRE_peak_1996	34	.	2.476	5.82293	3.45568	91
chr1	92300728	92300897	PotentialPeaks_FAIRE_peak_1997	55	.	2.77471	8.12511	5.59991	111
chr1	92314675	92314937	PotentialPeaks_FAIRE_peak_1998	39	.	2.57154	6.33422	3.91272	132
chr1	92320602	92321040	PotentialPeaks_FAIRE_peak_1999	168	.	4.17777	19.7717	16.8885	215
chr1	92330692	92330863	PotentialPeaks_FAIRE_peak_2000	63	.	3.05796	8.93793	6.37167	55
[truncated: 60,877 more rows]

## Sheet: Enrichement_AllPotentialPeaks
	width	NP_Merged	TND1_Merged	TND10_Merged	Input	NP_MergedEnrichment	TND1_MergedEnrichment	TND10_MergedEnrichment
PotentialPeaks_FAIRE_peak_1	288	31	28	12	15	1.19178	1.09662	0.444542
PotentialPeaks_FAIRE_peak_2	406	31	59	20	8	1.34983	2.02406	0.965163
PotentialPeaks_FAIRE_peak_3	179	9	12	5	4	0.537845	0.701344	0.286307
PotentialPeaks_FAIRE_peak_4	211	13	16	8	8	0.653219	0.795238	0.3802
PotentialPeaks_FAIRE_peak_5	155	9	7	11	12	0.346671	0.226377	0.457702
PotentialPeaks_FAIRE_peak_6	158	10	6	16	18	0.274855	0.0338465	0.574415
PotentialPeaks_FAIRE_peak_7	224	12	12	9	11	0.532726	0.532726	0.369228
PotentialPeaks_FAIRE_peak_8	928	99	71	41	50	1.87972	1.47718	0.867122
PotentialPeaks_FAIRE_peak_9	153	14	5	5	4	0.80088	0.286307	0.286307
PotentialPeaks_FAIRE_peak_10	162	16	13	6	9	0.771571	0.629552	0.231003
PotentialPeaks_FAIRE_peak_11	200	9	11	13	16	0.259814	0.370845	0.473939
PotentialPeaks_FAIRE_peak_12	168	7	10	16	7	0.342861	0.519739	0.819299
PotentialPeaks_FAIRE_peak_13	389	57	57	26	17	1.78486	1.78486	0.987354
PotentialPeaks_FAIRE_peak_14	336	40	49	18	7	1.62665	1.84167	0.906762
PotentialPeaks_FAIRE_peak_15	164	11	7	6	3	0.674658	0.443332	0.379202
PotentialPeaks_FAIRE_peak_16	486	123	110	50	23	2.59445	2.45279	1.5199
PotentialPeaks_FAIRE_peak_17	171	17	8	7	9	0.815965	0.356533	0.295133
PotentialPeaks_FAIRE_peak_18	237	30	27	22	5	1.39222	1.29493	1.11659
PotentialPeaks_FAIRE_peak_19	385	38	36	29	11	1.48026	1.42581	1.21722
PotentialPeaks_FAIRE_peak_20	182	5	6	12	20	-0.0736479	-0.00653374	0.34139
PotentialPeaks_FAIRE_peak_21	314	60	37	23	11	1.9733	1.45329	1.01077
PotentialPeaks_FAIRE_peak_22	180	12	5	10	4	0.701344	0.286307	0.594429
PotentialPeaks_FAIRE_peak_23	153	8	5	12	9	0.356533	0.163888	0.578926
PotentialPeaks_FAIRE_peak_24	317	39	23	16	19	1.33544	0.839486	0.554083
PotentialPeaks_FAIRE_peak_25	210	16	20	15	15	0.637187	0.807112	0.591383
PotentialPeaks_FAIRE_peak_26	153	19	2	8	9	0.900854	-0.0585041	0.356533
PotentialPeaks_FAIRE_peak_27	312	40	50	25	5	1.67602	1.91305	1.22621
PotentialPeaks_FAIRE_peak_28	170	18	11	9	7	0.906762	0.574187	0.463155
PotentialPeaks_FAIRE_peak_29	264	25	24	18	22	0.852306	0.816682	0.582217
PotentialPeaks_FAIRE_peak_30	336	32	37	11	2	1.53098	1.67394	0.700909
PotentialPeaks_FAIRE_peak_31	162	4	11	6	4	0.215917	0.648877	0.353421
PotentialPeaks_FAIRE_peak_32	222	32	13	13	16	1.20092	0.473939	0.473939
PotentialPeaks_FAIRE_peak_33	169	11	12	9	5	0.623548	0.676015	0.512517
PotentialPeaks_FAIRE_peak_34	167	9	9	8	14	0.302589	0.302589	0.243695
PotentialPeaks_FAIRE_peak_35	332	29	25	9	12	1.19467	1.06037	0.346671
PotentialPeaks_FAIRE_peak_36	256	27	18	6	17	1.0213	0.6825	0.0544685
PotentialPeaks_FAIRE_peak_37	300	44	32	4	18	1.48131	1.15938	-0.103657
PotentialPeaks_FAIRE_peak_38	394	27	23	8	16	1.04222	0.90136	0.20092
PotentialPeaks_FAIRE_peak_39	242	15	21	6	14	0.612929	0.868186	0.118164
PotentialPeaks_FAIRE_peak_40	941	220	153	68	41	3.04951	2.56775	1.55919
PotentialPeaks_FAIRE_peak_41	252	16	19	8	8	0.795238	0.924521	0.3802
PotentialPeaks_FAIRE_peak_42	179	15	13	12	10	0.702483	0.606267	0.555641
PotentialPeaks_FAIRE_peak_43	882	207	148	76	28	3.18385	2.7405	1.90651
PotentialPeaks_FAIRE_peak_44	166	6	4	7	15	0.0966184	-0.0408851	0.160749
PotentialPeaks_FAIRE_peak_45	375	40	21	9	7	1.62665	1.02875	0.463155
PotentialPeaks_FAIRE_peak_46	160	14	9	12	8	0.702128	0.439094	0.602593
PotentialPeaks_FAIRE_peak_47	325	29	29	17	13	1.17246	1.17246	0.725
PotentialPeaks_FAIRE_peak_48	170	14	8	7	5	0.775551	0.453623	0.392222
PotentialPeaks_FAIRE_peak_49	153	11	4	7	7	0.574187	0.141227	0.342861
PotentialPeaks_FAIRE_peak_50	279	39	28	14	28	1.16431	0.84238	0.289839
PotentialPeaks_FAIRE_peak_51	476	134	104	54	21	2.74308	2.42115	1.64354
PotentialPeaks_FAIRE_peak_52	182	22	10	10	11	0.973299	0.425811	0.425811
PotentialPeaks_FAIRE_peak_53	237	10	10	21	14	0.359172	0.359172	0.868186
PotentialPeaks_FAIRE_peak_54	266	17	17	19	15	0.681581	0.681581	0.76647
PotentialPeaks_FAIRE_peak_55	380	32	44	9	10	1.33325	1.65518	0.392142
PotentialPeaks_FAIRE_peak_56	261	15	6	14	18	0.528611	0.0338465	0.481305
PotentialPeaks_FAIRE_peak_57	211	17	10	3	12	0.747209	0.403254	-0.0492578
PotentialPeaks_FAIRE_peak_58	271	24	22	4	6	1.1657	1.0917	0.165697
PotentialPeaks_FAIRE_peak_59	222	24	19	10	5	1.19059	0.997943	0.5691
PotentialPeaks_FAIRE_peak_60	451	60	20	5	14	1.90666	0.828658	0.0510502
PotentialPeaks_FAIRE_peak_61	387	50	28	10	11	1.76977	1.1848	0.425811
PotentialPeaks_FAIRE_peak_62	156	19	13	3	6	0.973052	0.70175	0.0916961
PotentialPeaks_FAIRE_peak_63	335	32	16	10	10	1.33325	0.748286	0.448726
PotentialPeaks_FAIRE_peak_64	865	107	90	15	25	2.38028	2.16569	0.391965
PotentialPeaks_FAIRE_peak_65	531	157	131	58	21	2.94889	2.71393	1.72371
PotentialPeaks_FAIRE_peak_66	237	25	11	16	14	1.01628	0.41362	0.658733
PotentialPeaks_FAIRE_peak_67	247	17	7	9	9	0.815965	0.295133	0.415427
PotentialPeaks_FAIRE_peak_68	204	14	13	8	9	0.678462	0.629552	0.356533
PotentialPeaks_FAIRE_peak_69	351	54	52	34	18	1.7037	1.66188	1.21827
PotentialPeaks_FAIRE_peak_70	210	8	3	16	11	0.310334	-0.0267012	0.725371
PotentialPeaks_FAIRE_peak_71	310	44	25	9	10	1.65518	1.10584	0.392142
PotentialPeaks_FAIRE_peak_72	485	70	64	25	17	2.0213	1.91696	0.952589
PotentialPeaks_FAIRE_peak_73	325	52	37	17	9	1.85903	1.49949	0.815965
PotentialPeaks_FAIRE_peak_74	251	55	35	9	8	1.94498	1.46766	0.439094
PotentialPeaks_FAIRE_peak_75	186	19	11	13	8	0.924521	0.550125	0.653219
PotentialPeaks_FAIRE_peak_76	153	11	7	6	9	0.526458	0.295133	0.231003
PotentialPeaks_FAIRE_peak_77	330	30	27	14	15	1.16075	1.06345	0.544077
PotentialPeaks_FAIRE_peak_78	279	24	23	9	16	0.937886	0.90136	0.259814
PotentialPeaks_FAIRE_peak_79	233	28	14	5	10	1.20772	0.655177	0.140604
PotentialPeaks_FAIRE_peak_80	313	43	37	9	5	1.7513	1.59658	0.512517
PotentialPeaks_FAIRE_peak_81	234	7	17	11	14	0.182295	0.703127	0.41362
PotentialPeaks_FAIRE_peak_82	156	13	5	1	7	0.67728	0.211616	-0.0932381
PotentialPeaks_FAIRE_peak_83	192	17	16	6	6	0.888163	0.843769	0.3032
PotentialPeaks_FAIRE_peak_84	202	20	12	10	7	0.989224	0.626654	0.519739
PotentialPeaks_FAIRE_peak_85	511	47	25	10	17	1.57232	0.952589	0.295477
PotentialPeaks_FAIRE_peak_86	153	7	11	2	9	0.295133	0.526458	-0.0585041
PotentialPeaks_FAIRE_peak_87	176	10	12	2	7	0.519739	0.626654	-0.010776
PotentialPeaks_FAIRE_peak_88	173	21	7	9	9	0.981024	0.295133	0.415427
PotentialPeaks_FAIRE_peak_89	216	18	13	10	6	0.931231	0.70175	0.544208
PotentialPeaks_FAIRE_peak_90	207	16	11	7	5	0.86866	0.623548	0.392222
PotentialPeaks_FAIRE_peak_91	182	9	17	4	11	0.369228	0.769765	0.0472994
PotentialPeaks_FAIRE_peak_92	510	65	56	23	13	2.02046	1.85053	0.966008
PotentialPeaks_FAIRE_peak_93	195	5	6	12	15	0.0295042	0.0966184	0.444542
PotentialPeaks_FAIRE_peak_94	269	20	13	17	14	0.828658	0.516714	0.703127
PotentialPeaks_FAIRE_peak_95	190	18	7	7	8	0.8827	0.3188	0.3188
PotentialPeaks_FAIRE_peak_96	293	34	16	16	10	1.39214	0.748286	0.748286
PotentialPeaks_FAIRE_peak_97	171	13	11	8	6	0.70175	0.598656	0.428731
PotentialPeaks_FAIRE_peak_98	160	18	9	5	10	0.835749	0.392142	0.140604
PotentialPeaks_FAIRE_peak_99	189	13	10	9	9	0.629552	0.472011	0.415427
PotentialPeaks_FAIRE_peak_100	198	22	13	2	7	1.06723	0.67728	-0.010776
PotentialPeaks_FAIRE_peak_101	251	16	14	16	11	0.725371	0.632262	0.725371
PotentialPeaks_FAIRE_peak_102	175	13	11	5	8	0.653219	0.550125	0.187555
PotentialPeaks_FAIRE_peak_103	306	21	20	7	18	0.783868	0.74434	0.0979768
PotentialPeaks_FAIRE_peak_104	255	16	18	11	15	0.637187	0.72465	0.392074
PotentialPeaks_FAIRE_peak_105	202	16	9	4	8	0.795238	0.439094	0.117166
PotentialPeaks_FAIRE_peak_106	484	47	22	10	28	1.36023	0.630876	0.0833879
PotentialPeaks_FAIRE_peak_107	505	65	36	19	23	1.81536	1.17595	0.604791
PotentialPeaks_FAIRE_peak_108	153	9	12	6	7	0.463155	0.626654	0.278731
PotentialPeaks_FAIRE_peak_109	498	46	26	20	39	1.15228	0.590397	0.368004
PotentialPeaks_FAIRE_peak_110	157	12	14	2	7	0.626654	0.72619	-0.010776
PotentialPeaks_FAIRE_peak_111	207	27	6	17	14	1.085	0.118164	0.703127
PotentialPeaks_FAIRE_peak_112	192	18	13	5	3	1.00723	0.777752	0.312088
PotentialPeaks_FAIRE_peak_113	242	50	24	6	10	1.79268	1.07021	0.207718
PotentialPeaks_FAIRE_peak_114	167	15	11	5	7	0.773495	0.574187	0.211616
PotentialPeaks_FAIRE_peak_115	504	48	58	11	10	1.74829	1.95774	0.503174
PotentialPeaks_FAIRE_peak_116	232	19	16	8	11	0.854654	0.725371	0.310334
PotentialPeaks_FAIRE_peak_117	195	16	8	7	6	0.843769	0.428731	0.367331
PotentialPeaks_FAIRE_peak_118	200	21	13	6	17	0.80449	0.453018	0.0544685
PotentialPeaks_FAIRE_peak_119	168	16	7	6	16	0.615958	0.13952	0.0753895
PotentialPeaks_FAIRE_peak_120	221	19	9	4	15	0.76647	0.281043	-0.0408851
PotentialPeaks_FAIRE_peak_121	160	15	11	1	2	0.900217	0.700909	0.0334839
PotentialPeaks_FAIRE_peak_122	173	12	13	8	12	0.51017	0.560796	0.287777
PotentialPeaks_FAIRE_peak_123	185	17	9	8	5	0.913054	0.512517	0.453623
PotentialPeaks_FAIRE_peak_124	199	11	9	10	13	0.435493	0.324462	0.381045
PotentialPeaks_FAIRE_peak_125	153	15	4	9	5	0.822857	0.190588	0.512517
PotentialPeaks_FAIRE_peak_126	153	10	8	6	3	0.62021	0.504733	0.379202
PotentialPeaks_FAIRE_peak_127	209	16	7	8	11	0.725371	0.248933	0.310334
PotentialPeaks_FAIRE_peak_128	195	18	5	6	9	0.859034	0.163888	0.231003
PotentialPeaks_FAIRE_peak_129	161	14	10	5	12	0.609705	0.403254	0.0951322
PotentialPeaks_FAIRE_peak_130	585	162	99	65	16	3.09169	2.46145	1.95581
PotentialPeaks_FAIRE_peak_131	186	35	11	13	3	1.5922	0.674658	0.777752
PotentialPeaks_FAIRE_peak_132	208	14	6	10	7	0.72619	0.278731	0.519739
PotentialPeaks_FAIRE_peak_133	259	28	16	14	10	1.20772	0.748286	0.655177
PotentialPeaks_FAIRE_peak_134	153	12	7	2	4	0.701344	0.417551	0.0639141
PotentialPeaks_FAIRE_peak_135	179	17	17	6	3	0.964165	0.964165	0.379202
PotentialPeaks_FAIRE_peak_136	477	77	52	38	13	2.21976	1.76807	1.43549
PotentialPeaks_FAIRE_peak_137	238	15	12	10	7	0.773495	0.626654	0.519739
PotentialPeaks_FAIRE_peak_138	160	3	13	6	5	0.116588	0.726641	0.328092
PotentialPeaks_FAIRE_peak_139	160	12	5	10	10	0.555641	0.140604	0.448726
PotentialPeaks_FAIRE_peak_140	335	68	39	32	19	1.9464	1.33544	1.13905
PotentialPeaks_FAIRE_peak_141	221	28	18	10	11	1.1848	0.812834	0.425811
PotentialPeaks_FAIRE_peak_142	233	47	34	21	33	1.27325	0.939827	0.505424
PotentialPeaks_FAIRE_peak_143	588	108	68	72	65	1.79132	1.22944	1.29656
PotentialPeaks_FAIRE_peak_144	173	9	8	5	13	0.324462	0.265568	0.0729228
PotentialPeaks_FAIRE_peak_145	174	8	10	13	17	0.179999	0.295477	0.453018
PotentialPeaks_FAIRE_peak_146	290	24	22	8	11	1.0473	0.973299	0.310334
PotentialPeaks_FAIRE_peak_147	288	26	22	6	17	0.987354	0.842964	0.0544685
PotentialPeaks_FAIRE_peak_148	219	8	13	12	10	0.333249	0.606267	0.555641
PotentialPeaks_FAIRE_peak_149	167	13	8	4	3	0.777752	0.504733	0.241699
PotentialPeaks_FAIRE_peak_150	229	20	17	5	15	0.807112	0.681581	0.0295042
PotentialPeaks_FAIRE_peak_151	230	14	14	7	17	0.501927	0.501927	0.118599
PotentialPeaks_FAIRE_peak_152	379	60	33	15	12	1.95074	1.31752	0.657011
PotentialPeaks_FAIRE_peak_153	337	20	18	24	30	0.517451	0.434988	0.669454
PotentialPeaks_FAIRE_peak_154	188	19	8	5	8	0.924521	0.3802	0.187555
PotentialPeaks_FAIRE_peak_155	157	9	5	10	6	0.487625	0.236086	0.544208
PotentialPeaks_FAIRE_peak_156	289	27	13	5	19	0.980348	0.412064	-0.0535991
PotentialPeaks_FAIRE_peak_157	630	76	83	34	28	1.90651	2.0123	1.0268
PotentialPeaks_FAIRE_peak_158	183	11	6	3	7	0.574187	0.278731	0.0672266
PotentialPeaks_FAIRE_peak_159	207	21	10	2	3	1.12922	0.62021	0.0896955
PotentialPeaks_FAIRE_peak_160	153	11	11	5	2	0.700909	0.700909	0.338338
PotentialPeaks_FAIRE_peak_161	200	12	14	10	13	0.48796	0.587496	0.381045
PotentialPeaks_FAIRE_peak_162	157	12	8	10	17	0.402392	0.179999	0.295477
PotentialPeaks_FAIRE_peak_163	236	20	16	16	11	0.895296	0.725371	0.725371
PotentialPeaks_FAIRE_peak_164	241	16	21	10	8	0.795238	1.00469	0.495677
PotentialPeaks_FAIRE_peak_165	425	33	26	8	6	1.45848	1.23609	0.428731
PotentialPeaks_FAIRE_peak_166	154	8	10	1	3	0.504733	0.62021	0.00723335
PotentialPeaks_FAIRE_peak_167	160	9	6	6	11	0.369228	0.184803	0.184803
PotentialPeaks_FAIRE_peak_168	230	37	17	16	23	1.20343	0.519902	0.475508
PotentialPeaks_FAIRE_peak_169	196	11	19	3	9	0.526458	0.900854	0.0194984
PotentialPeaks_FAIRE_peak_170	199	17	14	9	12	0.747209	0.609705	0.346671
PotentialPeaks_FAIRE_peak_171	636	147	76	71	30	2.69625	1.87109	1.79047
PotentialPeaks_FAIRE_peak_172	215	10	9	7	11	0.425811	0.369228	0.248933
PotentialPeaks_FAIRE_peak_173	153	13	12	6	10	0.606267	0.555641	0.207718
PotentialPeaks_FAIRE_peak_174	200	17	11	6	11	0.769765	0.480259	0.184803
PotentialPeaks_FAIRE_peak_175	265	18	17	8	9	0.859034	0.815965	0.356533
PotentialPeaks_FAIRE_peak_176	427	53	45	44	26	1.52779	1.35	1.32615
PotentialPeaks_FAIRE_peak_177	525	62	60	25	21	1.79966	1.76219	0.871813
PotentialPeaks_FAIRE_peak_178	180	6	19	8	2	0.405453	1.0753	0.530984
PotentialPeaks_FAIRE_peak_179	360	32	27	8	22	1.07972	0.921019	0.0797165
PotentialPeaks_FAIRE_peak_180	264	17	15	7	13	0.725	0.634802	0.204167
PotentialPeaks_FAIRE_peak_181	160	9	12	6	2	0.589877	0.753376	0.405453
PotentialPeaks_FAIRE_peak_182	159	7	9	11	9	0.295133	0.415427	0.526458
PotentialPeaks_FAIRE_peak_183	241	14	12	9	12	0.609705	0.51017	0.346671
PotentialPeaks_FAIRE_peak_184	537	33	25	30	32	0.927662	0.670504	0.836514
PotentialPeaks_FAIRE_peak_185	153	5	3	13	11	0.117689	-0.0267012	0.583352
PotentialPeaks_FAIRE_peak_186	194	14	11	8	7	0.72619	0.574187	0.404262
PotentialPeaks_FAIRE_peak_187	175	13	8	10	13	0.538586	0.265568	0.381045
PotentialPeaks_FAIRE_peak_188	327	46	35	4	8	1.74943	1.46766	0.117166
PotentialPeaks_FAIRE_peak_189	206	11	8	9	5	0.623548	0.453623	0.512517
PotentialPeaks_FAIRE_peak_190	196	14	13	7	11	0.632262	0.583352	0.248933
PotentialPeaks_FAIRE_peak_191	391	74	77	33	12	2.19467	2.24197	1.31752
PotentialPeaks_FAIRE_peak_192	213	32	15	5	8	1.3802	0.749434	0.187555
PotentialPeaks_FAIRE_peak_193	543	171	139	85	39	2.74497	2.4742	1.85629
PotentialPeaks_FAIRE_peak_194	153	13	10	9	9	0.629552	0.472011	0.415427
PotentialPeaks_FAIRE_peak_195	405	48	55	18	12	1.70281	1.85256	0.790278
PotentialPeaks_FAIRE_peak_196	194	13	10	6	8	0.653219	0.495677	0.254669
PotentialPeaks_FAIRE_peak_197	233	37	14	7	12	1.43074	0.609705	0.226377
PotentialPeaks_FAIRE_peak_198	208	18	21	4	2	1.03348	1.15547	0.267949
PotentialPeaks_FAIRE_peak_199	272	30	22	19	15	1.16075	0.885114	0.76647
PotentialPeaks_FAIRE_peak_200	612	51	50	43	22	1.56084	1.53915	1.3774
PotentialPeaks_FAIRE_peak_201	183	17	9	12	8	0.839632	0.439094	0.602593
PotentialPeaks_FAIRE_peak_202	163	11	10	1	11	0.480259	0.425811	-0.187166
PotentialPeaks_FAIRE_peak_203	216	22	20	8	18	0.822342	0.74434	0.159377
PotentialPeaks_FAIRE_peak_204	153	7	13	3	7	0.342861	0.67728	0.0672266
PotentialPeaks_FAIRE_peak_205	168	9	5	9	10	0.392142	0.140604	0.392142
PotentialPeaks_FAIRE_peak_206	153	12	5	4	7	0.626654	0.211616	0.141227
PotentialPeaks_FAIRE_peak_207	181	16	5	10	8	0.795238	0.187555	0.495677
PotentialPeaks_FAIRE_peak_208	309	34	19	4	11	1.36923	0.854654	0.0472994
PotentialPeaks_FAIRE_peak_209	413	87	59	15	18	2.26092	1.80323	0.528611
PotentialPeaks_FAIRE_peak_210	203	10	13	2	8	0.495677	0.653219	-0.0348374
PotentialPeaks_FAIRE_peak_211	232	21	12	14	5	1.07811	0.676015	0.775551
PotentialPeaks_FAIRE_peak_212	153	8	14	4	4	0.478952	0.80088	0.215917
PotentialPeaks_FAIRE_peak_213	216	9	9	8	16	0.259814	0.259814	0.20092
PotentialPeaks_FAIRE_peak_214	194	10	10	21	20	0.234474	0.234474	0.743488
PotentialPeaks_FAIRE_peak_215	208	15	15	18	16	0.570154	0.570154	0.703421
PotentialPeaks_FAIRE_peak_216	195	14	13	9	20	0.440925	0.392016	0.177891
PotentialPeaks_FAIRE_peak_217	196	18	17	7	3	1.00723	0.964165	0.443332
PotentialPeaks_FAIRE_peak_218	308	38	34	9	9	1.52646	1.41543	0.415427
PotentialPeaks_FAIRE_peak_219	336	19	27	6	14	0.788016	1.085	0.118164
PotentialPeaks_FAIRE_peak_220	153	9	3	7	13	0.324462	-0.0714671	0.204167
PotentialPeaks_FAIRE_peak_221	192	8	8	9	6	0.428731	0.428731	0.487625
PotentialPeaks_FAIRE_peak_222	173	16	14	10	10	0.748286	0.655177	0.448726
PotentialPeaks_FAIRE_peak_223	238	21	10	7	9	0.981024	0.472011	0.295133
PotentialPeaks_FAIRE_peak_224	353	44	37	18	19	1.46097	1.282	0.641546
PotentialPeaks_FAIRE_peak_225	210	23	10	7	8	1.08064	0.495677	0.3188
PotentialPeaks_FAIRE_peak_226	192	10	13	7	6	0.544208	0.70175	0.367331
PotentialPeaks_FAIRE_peak_227	200	11	13	7	18	0.329302	0.432396	0.0979768
PotentialPeaks_FAIRE_peak_228	153	3	10	3	3	0.167698	0.62021	0.167698
PotentialPeaks_FAIRE_peak_229	195	14	14	3	13	0.587496	0.587496	-0.0714671
PotentialPeaks_FAIRE_peak_230	252	17	15	11	7	0.863693	0.773495	0.574187
PotentialPeaks_FAIRE_peak_231	153	13	2	8	4	0.75197	0.0639141	0.478952
PotentialPeaks_FAIRE_peak_232	501	80	83	30	19	2.13905	2.18344	1.07765
PotentialPeaks_FAIRE_peak_233	373	52	43	25	17	1.6825	1.47768	0.952589
PotentialPeaks_FAIRE_peak_234	260	18	14	5	16	0.703421	0.522849	0.00827533
PotentialPeaks_FAIRE_peak_235	290	23	20	10	6	1.12917	1.01369	0.544208
PotentialPeaks_FAIRE_peak_236	269	29	14	8	12	1.19467	0.609705	0.287777
PotentialPeaks_FAIRE_peak_237	210	19	16	9	16	0.745241	0.615958	0.259814
PotentialPeaks_FAIRE_peak_238	277	17	14	5	4	0.938383	0.80088	0.286307
PotentialPeaks_FAIRE_peak_239	177	12	11	5	5	0.676015	0.623548	0.260978
PotentialPeaks_FAIRE_peak_240	475	36	35	24	23	1.17595	1.14793	0.797436
PotentialPeaks_FAIRE_peak_241	282	41	27	5	21	1.34715	0.940525	-0.093422
PotentialPeaks_FAIRE_peak_242	1174	262	146	42	48	3.18161	2.40252	0.920652
PotentialPeaks_FAIRE_peak_243	314	21	9	26	22	0.704207	0.13861	0.887071
PotentialPeaks_FAIRE_peak_244	451	31	24	16	18	1.129	0.896343	0.574415
PotentialPeaks_FAIRE_peak_245	249	42	21	15	17	1.45302	0.80449	0.549233
PotentialPeaks_FAIRE_peak_246	169	11	7	4	5	0.623548	0.392222	0.190588
PotentialPeaks_FAIRE_peak_247	207	6	16	10	7	0.278731	0.819299	0.519739
PotentialPeaks_FAIRE_peak_248	200	27	15	10	11	1.15164	0.679568	0.425811
PotentialPeaks_FAIRE_peak_249	240	21	12	19	11	0.934825	0.532726	0.854654
PotentialPeaks_FAIRE_peak_250	343	43	33	13	7	1.70194	1.43401	0.67728
PotentialPeaks_FAIRE_peak_251	235	17	15	9	10	0.79268	0.702483	0.392142
PotentialPeaks_FAIRE_peak_252	153	6	1	6	4	0.353421	-0.0185481	0.353421
PotentialPeaks_FAIRE_peak_253	158	13	7	5	5	0.726641	0.392222	0.260978
PotentialPeaks_FAIRE_peak_254	216	12	21	13	8	0.602593	1.00469	0.653219
PotentialPeaks_FAIRE_peak_255	382	128	114	56	19	2.72401	2.57645	1.72401
PotentialPeaks_FAIRE_peak_256	251	13	18	13	17	0.453018	0.6825	0.453018
PotentialPeaks_FAIRE_peak_257	344	44	33	16	15	1.54408	1.2519	0.637187
PotentialPeaks_FAIRE_peak_258	342	49	48	22	9	1.79394	1.77157	1.0195
PotentialPeaks_FAIRE_peak_259	162	11	11	5	5	0.623548	0.623548	0.260978
PotentialPeaks_FAIRE_peak_260	212	19	11	12	9	0.900854	0.526458	0.578926
PotentialPeaks_FAIRE_peak_261	218	26	15	21	12	1.09513	0.657011	0.912268
PotentialPeaks_FAIRE_peak_262	639	142	109	41	18	2.8782	2.5402	1.4073
PotentialPeaks_FAIRE_peak_263	154	13	6	7	8	0.653219	0.254669	0.3188
PotentialPeaks_FAIRE_peak_264	153	10	5	6	3	0.62021	0.312088	0.379202
PotentialPeaks_FAIRE_peak_265	383	53	35	12	9	1.8801	1.444	0.578926
PotentialPeaks_FAIRE_peak_266	259	23	19	4	13	0.966008	0.809888	0.00253348
PotentialPeaks_FAIRE_peak_267	206	31	20	15	17	1.14963	0.764962	0.549233
PotentialPeaks_FAIRE_peak_268	577	82	66	42	24	2.07122	1.81407	1.3145
PotentialPeaks_FAIRE_peak_269	172	8	13	7	7	0.404262	0.67728	0.342861
PotentialPeaks_FAIRE_peak_270	556	63	45	18	20	1.83782	1.46477	0.621497
PotentialPeaks_FAIRE_peak_271	195	13	9	14	21	0.372242	0.158117	0.421151
PotentialPeaks_FAIRE_peak_272	252	29	22	17	14	1.15059	0.90666	0.703127
PotentialPeaks_FAIRE_peak_273	158	13	7	4	7	0.67728	0.342861	0.141227
PotentialPeaks_FAIRE_peak_274	198	10	12	5	10	0.448726	0.555641	0.140604
PotentialPeaks_FAIRE_peak_275	195	14	11	8	7	0.72619	0.574187	0.404262
PotentialPeaks_FAIRE_peak_276	195	21	7	6	1	1.18221	0.49632	0.43219
PotentialPeaks_FAIRE_peak_277	178	9	13	7	13	0.324462	0.538586	0.204167
PotentialPeaks_FAIRE_peak_278	153	8	2	5	5	0.453623	0.0385853	0.260978
PotentialPeaks_FAIRE_peak_279	213	27	5	5	5	1.29493	0.260978	0.260978
PotentialPeaks_FAIRE_peak_280	332	20	25	5	9	0.941496	1.12912	0.163888
PotentialPeaks_FAIRE_peak_281	153	12	4	5	1	0.780113	0.294686	0.365076
PotentialPeaks_FAIRE_peak_282	232	39	20	15	16	1.39732	0.785883	0.570154
PotentialPeaks_FAIRE_peak_283	153	10	9	3	4	0.594429	0.537845	0.141917
PotentialPeaks_FAIRE_peak_284	153	14	10	6	9	0.678462	0.472011	0.231003
PotentialPeaks_FAIRE_peak_285	843	45	77	26	22	1.42549	2.03391	0.887071
PotentialPeaks_FAIRE_peak_286	156	9	13	1	2	0.589877	0.804002	0.0334839
PotentialPeaks_FAIRE_peak_287	191	15	19	5	1	0.926954	1.10204	0.365076
PotentialPeaks_FAIRE_peak_288	275	23	18	14	27	0.686393	0.488454	0.307882
PotentialPeaks_FAIRE_peak_289	416	110	80	27	15	2.61447	2.22215	1.06345
PotentialPeaks_FAIRE_peak_290	393	50	36	11	9	1.81597	1.47201	0.526458
PotentialPeaks_FAIRE_peak_291	169	9	13	8	4	0.537845	0.75197	0.478952
PotentialPeaks_FAIRE_peak_292	153	7	9	5	6	0.367331	0.487625	0.236086
PotentialPeaks_FAIRE_peak_293	244	26	8	21	23	0.867825	0.06047	0.684961
PotentialPeaks_FAIRE_peak_294	159	8	7	9	8	0.3802	0.3188	0.439094
PotentialPeaks_FAIRE_peak_295	386	44	60	24	10	1.65518	1.99621	1.07021
PotentialPeaks_FAIRE_peak_296	233	15	15	7	10	0.702483	0.702483	0.271848
PotentialPeaks_FAIRE_peak_297	215	19	18	4	14	0.788016	0.746196	-0.0193391
PotentialPeaks_FAIRE_peak_298	203	5	8	11	6	0.236086	0.428731	0.598656
PotentialPeaks_FAIRE_peak_299	178	11	9	10	3	0.674658	0.563627	0.62021
PotentialPeaks_FAIRE_peak_300	293	28	34	5	10	1.20772	1.39214	0.140604
PotentialPeaks_FAIRE_peak_301	289	45	38	23	9	1.70231	1.52646	1.05697
PotentialPeaks_FAIRE_peak_302	197	16	10	15	8	0.795238	0.495677	0.749434
PotentialPeaks_FAIRE_peak_303	286	29	27	19	20	1.02589	0.960299	0.663318
PotentialPeaks_FAIRE_peak_304	182	10	10	6	8	0.495677	0.495677	0.254669
PotentialPeaks_FAIRE_peak_305	179	8	14	7	6	0.428731	0.750659	0.367331
PotentialPeaks_FAIRE_peak_306	159	15	4	5	12	0.657011	0.0247428	0.0951322
PotentialPeaks_FAIRE_peak_307	238	30	25	10	7	1.34286	1.17685	0.519739
PotentialPeaks_FAIRE_peak_308	572	106	94	38	49	1.97912	1.82974	0.803269
PotentialPeaks_FAIRE_peak_309	546	98	88	46	11	2.55826	2.42581	1.67957
PotentialPeaks_FAIRE_peak_310	153	10	7	5	12	0.403254	0.226377	0.0951322
PotentialPeaks_FAIRE_peak_311	309	35	22	15	21	1.18669	0.762188	0.468457
PotentialPeaks_FAIRE_peak_312	187	15	14	9	11	0.679568	0.632262	0.369228
PotentialPeaks_FAIRE_peak_313	199	7	15	8	21	0.0378226	0.468457	0.0992231
PotentialPeaks_FAIRE_peak_314	214	13	10	12	6	0.70175	0.544208	0.651124
PotentialPeaks_FAIRE_peak_315	252	18	15	6	9	0.859034	0.725767	0.231003
PotentialPeaks_FAIRE_peak_316	259	32	27	18	20	1.119	0.960299	0.621497
PotentialPeaks_FAIRE_peak_317	202	11	10	19	23	0.230395	0.175947	0.604791
PotentialPeaks_FAIRE_peak_318	202	16	11	8	10	0.748286	0.503174	0.333249
PotentialPeaks_FAIRE_peak_319	153	4	10	9	8	0.117166	0.495677	0.439094
PotentialPeaks_FAIRE_peak_320	215	6	9	14	6	0.3032	0.487625	0.750659
PotentialPeaks_FAIRE_peak_321	193	20	16	5	3	1.0897	0.919771	0.312088
PotentialPeaks_FAIRE_peak_322	255	12	13	12	8	0.602593	0.653219	0.602593
PotentialPeaks_FAIRE_peak_323	286	1003	244	1224	512	2.56536	0.594792	2.84855
PotentialPeaks_FAIRE_peak_324	751	111	84	43	18	2.5631	2.21827	1.45706
PotentialPeaks_FAIRE_peak_325	216	32	24	11	33	0.880933	0.617899	0.0508583
PotentialPeaks_FAIRE_peak_326	165	14	9	8	10	0.655177	0.392142	0.333249
PotentialPeaks_FAIRE_peak_327	252	23	13	13	20	0.819437	0.392016	0.392016
PotentialPeaks_FAIRE_peak_328	159	11	8	2	6	0.598656	0.428731	0.0136936
PotentialPeaks_FAIRE_peak_329	260	19	5	12	14	0.788016	0.0510502	0.466088
PotentialPeaks_FAIRE_peak_330	289	43	23	9	14	1.54138	0.944135	0.302589
PotentialPeaks_FAIRE_peak_331	172	13	11	11	3	0.777752	0.674658	0.674658
PotentialPeaks_FAIRE_peak_332	153	10	4	3	8	0.495677	0.117166	0.0431651
PotentialPeaks_FAIRE_peak_333	170	8	14	7	3	0.504733	0.826661	0.443332
PotentialPeaks_FAIRE_peak_334	464	30	35	23	29	0.88869	1.03755	0.65053
PotentialPeaks_FAIRE_peak_335	196	12	15	15	13	0.48796	0.634802	0.634802
PotentialPeaks_FAIRE_peak_336	224	20	7	6	9	0.941496	0.295133	0.231003
PotentialPeaks_FAIRE_peak_337	200	28	26	12	29	0.82456	0.757446	0.172483
PotentialPeaks_FAIRE_peak_338	198	28	25	22	25	0.8972	0.79532	0.685696
PotentialPeaks_FAIRE_peak_339	190	13	14	28	56	-0.189889	-0.14098	0.411561
PotentialPeaks_FAIRE_peak_340	525	53	75	70	106	0.513699	0.91297	0.83144
PotentialPeaks_FAIRE_peak_341	468	64	76	30	57	1.26082	1.46245	0.462451
PotentialPeaks_FAIRE_peak_342	228	19	26	5	3	1.04905	1.31209	0.312088
PotentialPeaks_FAIRE_peak_343	203	16	12	6	16	0.615958	0.423313	0.0753895
PotentialPeaks_FAIRE_peak_344	194	2	6	15	9	-0.0585041	0.231003	0.725767
PotentialPeaks_FAIRE_peak_345	353	22	18	8	14	0.90666	0.746196	0.243695
PotentialPeaks_FAIRE_peak_346	161	2	4	5	14	-0.171342	-0.0193391	0.0510502
PotentialPeaks_FAIRE_peak_347	228	14	8	15	12	0.609705	0.287777	0.657011
PotentialPeaks_FAIRE_peak_348	208	19	13	3	7	0.948582	0.67728	0.0672266
PotentialPeaks_FAIRE_peak_349	153	7	8	10	5	0.392222	0.453623	0.5691
PotentialPeaks_FAIRE_peak_350	172	6	4	15	17	0.0544685	-0.0830351	0.549233
PotentialPeaks_FAIRE_peak_351	388	35	42	14	13	1.35303	1.53859	0.587496
PotentialPeaks_FAIRE_peak_352	652	68	94	26	12	2.09513	2.48417	1.09513
PotentialPeaks_FAIRE_peak_353	176	14	9	14	11	0.632262	0.369228	0.632262
PotentialPeaks_FAIRE_peak_354	690	121	92	44	30	2.44556	2.10241	1.25442
PotentialPeaks_FAIRE_peak_355	201	22	9	20	22	0.742681	0.13861	0.664679
PotentialPeaks_FAIRE_peak_356	204	19	14	19	15	0.76647	0.544077	0.76647
PotentialPeaks_FAIRE_peak_357	189	9	11	7	6	0.487625	0.598656	0.367331
PotentialPeaks_FAIRE_peak_358	534	83	67	31	19	2.18344	1.92912	1.10867
PotentialPeaks_FAIRE_peak_359	160	7	10	4	5	0.392222	0.5691	0.190588
PotentialPeaks_FAIRE_peak_360	191	19	8	4	7	0.948582	0.404262	0.141227
PotentialPeaks_FAIRE_peak_361	192	14	8	12	12	0.609705	0.287777	0.51017
PotentialPeaks_FAIRE_peak_362	215	18	16	4	14	0.746196	0.658733	-0.0193391
PotentialPeaks_FAIRE_peak_363	235	16	7	13	3	0.919771	0.443332	0.777752
PotentialPeaks_FAIRE_peak_364	215	15	12	11	12	0.657011	0.51017	0.457702
PotentialPeaks_FAIRE_peak_365	177	6	13	7	7	0.278731	0.67728	0.342861
PotentialPeaks_FAIRE_peak_366	187	11	9	5	2	0.700909	0.589877	0.338338
PotentialPeaks_FAIRE_peak_367	185	13	6	15	5	0.726641	0.328092	0.822857
PotentialPeaks_FAIRE_peak_368	306	56	37	20	16	1.78588	1.34388	0.785883
PotentialPeaks_FAIRE_peak_369	339	52	38	14	11	1.81283	1.48026	0.632262
PotentialPeaks_FAIRE_peak_370	833	67	68	41	30	1.72256	1.73984	1.18042
PotentialPeaks_FAIRE_peak_371	176	11	14	7	9	0.526458	0.678462	0.295133
PotentialPeaks_FAIRE_peak_372	231	21	20	15	15	0.84664	0.807112	0.591383
PotentialPeaks_FAIRE_peak_373	176	20	11	5	6	1.01369	0.598656	0.236086
PotentialPeaks_FAIRE_peak_374	153	14	5	7	9	0.678462	0.163888	0.295133
PotentialPeaks_FAIRE_peak_375	340	18	26	12	22	0.582217	0.887071	0.302109
PotentialPeaks_FAIRE_peak_376	469	78	63	24	16	2.17055	1.91974	0.937886
PotentialPeaks_FAIRE_peak_377	205	21	11	9	12	0.912268	0.457702	0.346671
PotentialPeaks_FAIRE_peak_378	162	18	6	5	3	1.00723	0.379202	0.312088
PotentialPeaks_FAIRE_peak_379	242	31	16	12	8	1.34983	0.795238	0.602593
PotentialPeaks_FAIRE_peak_380	153	16	13	4	3	0.919771	0.777752	0.241699
PotentialPeaks_FAIRE_peak_381	289	18	11	8	6	0.931231	0.598656	0.428731
PotentialPeaks_FAIRE_peak_382	163	16	10	6	8	0.795238	0.495677	0.254669
PotentialPeaks_FAIRE_peak_383	157	5	4	16	10	0.140604	0.0702143	0.748286
PotentialPeaks_FAIRE_peak_384	167	10	10	8	7	0.519739	0.519739	0.404262
PotentialPeaks_FAIRE_peak_385	153	9	12	2	10	0.392142	0.555641	-0.0817888
PotentialPeaks_FAIRE_peak_386	590	78	61	32	35	1.81719	1.52938	0.847559
PotentialPeaks_FAIRE_peak_387	229	16	19	10	8	0.795238	0.924521	0.495677
PotentialPeaks_FAIRE_peak_388	264	22	28	8	5	1.11659	1.32809	0.453623
PotentialPeaks_FAIRE_peak_389	153	12	9	2	5	0.676015	0.512517	0.0385853
PotentialPeaks_FAIRE_peak_390	187	15	9	5	10	0.702483	0.392142	0.140604
PotentialPeaks_FAIRE_peak_391	200	24	8	5	11	1.0473	0.310334	0.117689
PotentialPeaks_FAIRE_peak_392	167	12	18	5	11	0.532726	0.812834	0.117689
PotentialPeaks_FAIRE_peak_393	264	31	13	11	5	1.42325	0.726641	0.623548
PotentialPeaks_FAIRE_peak_394	462	44	37	17	30	1.25442	1.07545	0.39192
PotentialPeaks_FAIRE_peak_395	347	51	20	17	15	1.70328	0.807112	0.681581
PotentialPeaks_FAIRE_peak_396	173	17	6	5	12	0.747209	0.162246	0.0951322
PotentialPeaks_FAIRE_peak_397	186	17	7	4	3	0.964165	0.443332	0.241699
PotentialPeaks_FAIRE_peak_398	306	37	14	18	14	1.38665	0.565623	0.746196
PotentialPeaks_FAIRE_peak_399	277	30	21	8	18	1.09798	0.783868	0.159377
PotentialPeaks_FAIRE_peak_400	229	29	23	5	5	1.36051	1.15406	0.260978
PotentialPeaks_FAIRE_peak_401	252	22	10	13	11	0.973299	0.425811	0.583352
PotentialPeaks_FAIRE_peak_402	185	29	13	5	8	1.28709	0.653219	0.187555
PotentialPeaks_FAIRE_peak_403	249	50	9	3	7	1.86369	0.463155	0.0672266
PotentialPeaks_FAIRE_peak_404	189	13	8	9	4	0.75197	0.478952	0.537845
PotentialPeaks_FAIRE_peak_405	158	10	13	2	6	0.544208	0.70175	0.0136936
PotentialPeaks_FAIRE_peak_406	153	13	13	4	3	0.777752	0.777752	0.241699
PotentialPeaks_FAIRE_peak_407	426	49	31	25	21	1.53663	1.06885	0.871813
PotentialPeaks_FAIRE_peak_408	762	201	137	109	47	2.83866	2.33449	2.04289
PotentialPeaks_FAIRE_peak_409	364	79	50	26	15	2.20704	1.68158	1.0295
PotentialPeaks_FAIRE_peak_410	272	45	28	16	7	1.75004	1.27873	0.819299
PotentialPeaks_FAIRE_peak_411	175	14	8	4	6	0.750659	0.428731	0.165697
PotentialPeaks_FAIRE_peak_412	210	15	18	6	6	0.797965	0.931231	0.3032
PotentialPeaks_FAIRE_peak_413	314	53	35	26	8	1.90376	1.46766	1.18756
PotentialPeaks_FAIRE_peak_414	338	15	21	22	13	0.634802	0.890059	0.928533
PotentialPeaks_FAIRE_peak_415	223	13	18	13	8	0.653219	0.8827	0.653219
PotentialPeaks_FAIRE_peak_416	188	11	18	9	6	0.598656	0.931231	0.487625
PotentialPeaks_FAIRE_peak_417	229	18	12	2	5	0.956123	0.676015	0.0385853
PotentialPeaks_FAIRE_peak_418	169	18	3	6	6	0.931231	0.0916961	0.3032
PotentialPeaks_FAIRE_peak_419	413	34	22	16	21	1.15812	0.762188	0.514261
PotentialPeaks_FAIRE_peak_420	184	17	16	8	3	0.964165	0.919771	0.504733
PotentialPeaks_FAIRE_peak_421	313	63	44	10	5	2.17244	1.77555	0.5691
PotentialPeaks_FAIRE_peak_422	316	39	44	15	14	1.44009	1.56562	0.612929
PotentialPeaks_FAIRE_peak_423	226	27	21	14	18	1.00068	0.783868	0.481305
PotentialPeaks_FAIRE_peak_424	270	21	27	19	9	0.981024	1.19784	0.900854
PotentialPeaks_FAIRE_peak_425	171	18	16	7	5	0.956123	0.86866	0.392222
PotentialPeaks_FAIRE_peak_426	190	18	7	7	9	0.859034	0.295133	0.295133
PotentialPeaks_FAIRE_peak_427	218	21	12	4	17	0.80449	0.402392	-0.0830351
PotentialPeaks_FAIRE_peak_428	218	13	13	10	7	0.67728	0.67728	0.519739
PotentialPeaks_FAIRE_peak_429	187	13	16	4	8	0.653219	0.795238	0.117166
PotentialPeaks_FAIRE_peak_430	224	10	9	15	11	0.425811	0.369228	0.679568
PotentialPeaks_FAIRE_peak_431	499	45	48	22	16	1.5467	1.61596	0.863885
PotentialPeaks_FAIRE_peak_432	228	7	7	13	7	0.342861	0.342861	0.67728
PotentialPeaks_FAIRE_peak_433	154	5	11	7	11	0.117689	0.480259	0.248933
PotentialPeaks_FAIRE_peak_434	283	29	5	10	12	1.19467	0.0951322	0.403254
PotentialPeaks_FAIRE_peak_435	153	7	11	8	5	0.392222	0.623548	0.453623
PotentialPeaks_FAIRE_peak_436	313	23	20	10	5	1.15406	1.03859	0.5691
PotentialPeaks_FAIRE_peak_437	187	18	11	7	14	0.746196	0.41362	0.182295
PotentialPeaks_FAIRE_peak_438	272	15	9	11	10	0.702483	0.392142	0.503174
PotentialPeaks_FAIRE_peak_439	298	10	25	17	25	0.138208	0.79532	0.482162
PotentialPeaks_FAIRE_peak_440	165	9	13	4	7	0.463155	0.67728	0.141227
PotentialPeaks_FAIRE_peak_441	163	16	5	8	15	0.637187	0.0295042	0.222149
PotentialPeaks_FAIRE_peak_442	153	11	3	8	6	0.598656	0.0916961	0.428731
PotentialPeaks_FAIRE_peak_443	396	71	41	3	17	2.03798	1.42793	-0.157036
PotentialPeaks_FAIRE_peak_444	242	21	10	4	8	1.00469	0.495677	0.117166
PotentialPeaks_FAIRE_peak_445	630	69	54	32	18	1.98381	1.7037	1.15938
PotentialPeaks_FAIRE_peak_446	190	15	7	12	12	0.657011	0.226377	0.51017
PotentialPeaks_FAIRE_peak_447	198	4	15	5	7	0.141227	0.773495	0.211616
PotentialPeaks_FAIRE_peak_448	153	15	3	3	4	0.848185	0.141917	0.141917
PotentialPeaks_FAIRE_peak_449	354	29	27	8	14	1.15059	1.085	0.243695
PotentialPeaks_FAIRE_peak_450	219	26	15	5	13	1.07292	0.634802	0.0729228
PotentialPeaks_FAIRE_peak_451	163	6	7	4	3	0.379202	0.443332	0.241699
PotentialPeaks_FAIRE_peak_452	273	13	15	18	12	0.560796	0.657011	0.790278
PotentialPeaks_FAIRE_peak_453	459	77	34	7	9	2.31073	1.41543	0.295133
PotentialPeaks_FAIRE_peak_454	581	76	64	36	15	2.16075	1.95911	1.33763
PotentialPeaks_FAIRE_peak_455	349	117	75	35	21	2.56954	2.02206	1.18669
PotentialPeaks_FAIRE_peak_456	280	46	41	11	2	1.90022	1.77891	0.700909
PotentialPeaks_FAIRE_peak_457	274	20	11	8	17	0.764962	0.349924	0.179999
PotentialPeaks_FAIRE_peak_458	174	20	14	8	18	0.74434	0.481305	0.159377
PotentialPeaks_FAIRE_peak_459	176	18	12	7	8	0.8827	0.602593	0.3188
PotentialPeaks_FAIRE_peak_460	372	70	60	22	11	2.15164	1.9733	0.973299
PotentialPeaks_FAIRE_peak_461	305	39	30	15	14	1.44009	1.18229	0.612929
PotentialPeaks_FAIRE_peak_462	156	14	7	2	8	0.702128	0.3188	-0.0348374
PotentialPeaks_FAIRE_peak_463	154	12	7	3	8	0.602593	0.3188	0.0431651
PotentialPeaks_FAIRE_peak_464	261	34	23	14	17	1.23889	0.880439	0.501927
PotentialPeaks_FAIRE_peak_465	328	89	63	32	7	2.53354	2.12308	1.40426
PotentialPeaks_FAIRE_peak_466	206	13	10	5	7	0.67728	0.519739	0.211616
PotentialPeaks_FAIRE_peak_467	153	15	8	0	7	0.773495	0.404262	-0.180701
PotentialPeaks_FAIRE_peak_468	299	51	46	14	9	1.83766	1.72577	0.678462
PotentialPeaks_FAIRE_peak_469	379	121	94	58	27	2.49902	2.18235	1.61044
PotentialPeaks_FAIRE_peak_470	381	45	47	17	9	1.70231	1.74885	0.815965
PotentialPeaks_FAIRE_peak_471	212	24	20	10	15	0.959115	0.807112	0.337627
PotentialPeaks_FAIRE_peak_472	545	107	89	36	24	2.39903	2.17076	1.15695
PotentialPeaks_FAIRE_peak_473	504	164	129	71	22	2.98661	2.67466	1.9377
PotentialPeaks_FAIRE_peak_474	883	164	157	58	43	2.62818	2.57095	1.34578
PotentialPeaks_FAIRE_peak_475	246	45	37	7	8	1.72597	1.52316	0.3188
PotentialPeaks_FAIRE_peak_476	430	56	28	22	20	1.70396	0.993466	0.781962
PotentialPeaks_FAIRE_peak_477	385	36	20	12	14	1.35917	0.828658	0.466088
PotentialPeaks_FAIRE_peak_478	300	34	20	5	6	1.48762	1.01369	0.236086
PotentialPeaks_FAIRE_peak_479	153	10	6	8	1	0.673198	0.43219	0.557721
PotentialPeaks_FAIRE_peak_480	246	31	30	15	9	1.32616	1.29513	0.725767
PotentialPeaks_FAIRE_peak_481	397	116	93	42	20	2.57843	2.30222	1.39202
PotentialPeaks_FAIRE_peak_482	201	11	22	13	16	0.370845	0.863885	0.473939
PotentialPeaks_FAIRE_peak_483	395	129	97	47	16	2.79587	2.43614	1.59324
PotentialPeaks_FAIRE_peak_484	233	23	27	21	22	0.780156	0.921019	0.704207
PotentialPeaks_FAIRE_peak_485	270	35	10	12	22	1.16718	0.195194	0.302109
PotentialPeaks_FAIRE_peak_486	153	14	7	5	13	0.587496	0.204167	0.0729228
PotentialPeaks_FAIRE_peak_487	229	16	16	7	11	0.725371	0.725371	0.248933
PotentialPeaks_FAIRE_peak_488	245	22	12	17	10	0.996214	0.555641	0.79268
PotentialPeaks_FAIRE_peak_489	169	13	8	5	11	0.583352	0.310334	0.117689
PotentialPeaks_FAIRE_peak_490	188	16	20	6	4	0.893989	1.06391	0.353421
PotentialPeaks_FAIRE_peak_491	363	54	45	29	15	1.76647	1.56792	1.12904
PotentialPeaks_FAIRE_peak_492	343	83	65	15	19	2.18344	1.89393	0.50828
PotentialPeaks_FAIRE_peak_493	153	12	8	6	7	0.626654	0.404262	0.278731
PotentialPeaks_FAIRE_peak_494	166	13	7	7	10	0.606267	0.271848	0.271848
PotentialPeaks_FAIRE_peak_495	185	11	11	6	2	0.700909	0.700909	0.405453
PotentialPeaks_FAIRE_peak_496	276	17	18	23	19	0.598478	0.641546	0.839486
PotentialPeaks_FAIRE_peak_497	203	34	11	15	17	1.23889	0.349924	0.549233
PotentialPeaks_FAIRE_peak_498	296	38	26	19	32	1.06784	0.705269	0.442235
PotentialPeaks_FAIRE_peak_499	406	53	51	30	11	1.8339	1.79146	1.24893
PotentialPeaks_FAIRE_peak_500	234	15	18	7	2	0.900217	1.03348	0.469583
PotentialPeaks_FAIRE_peak_501	153	13	14	2	11	0.583352	0.632262	-0.104704
PotentialPeaks_FAIRE_peak_502	325	75	63	21	6	2.35156	2.14755	1.05322
PotentialPeaks_FAIRE_peak_503	153	1	5	11	10	-0.164251	0.140604	0.503174
PotentialPeaks_FAIRE_peak_504	236	15	13	12	6	0.797965	0.70175	0.651124
PotentialPeaks_FAIRE_peak_505	540	44	68	19	20	1.44093	1.92635	0.663318
PotentialPeaks_FAIRE_peak_506	159	9	7	2	2	0.589877	0.469583	0.115946
PotentialPeaks_FAIRE_peak_507	166	14	9	3	8	0.702128	0.439094	0.0431651
PotentialPeaks_FAIRE_peak_508	181	12	13	9	6	0.651124	0.70175	0.487625
PotentialPeaks_FAIRE_peak_509	205	21	18	14	14	0.868186	0.746196	0.565623
PotentialPeaks_FAIRE_peak_510	254	26	26	8	11	1.11769	1.11769	0.310334
PotentialPeaks_FAIRE_peak_511	257	35	19	7	10	1.42071	0.877569	0.271848
PotentialPeaks_FAIRE_peak_512	162	11	10	2	6	0.598656	0.544208	0.0136936
PotentialPeaks_FAIRE_peak_513	259	22	15	11	23	0.723435	0.429704	0.230395
PotentialPeaks_FAIRE_peak_514	754	261	190	100	26	3.533	3.10576	2.27724
PotentialPeaks_FAIRE_peak_515	820	93	88	47	35	2.03078	1.96304	1.23988
PotentialPeaks_FAIRE_peak_516	529	90	66	32	25	2.16569	1.79532	1.02273
PotentialPeaks_FAIRE_peak_517	183	10	9	4	17	0.295477	0.238893	-0.0830351
PotentialPeaks_FAIRE_peak_518	177	7	10	6	8	0.3188	0.495677	0.254669
PotentialPeaks_FAIRE_peak_519	191	10	13	5	5	0.5691	0.726641	0.260978
PotentialPeaks_FAIRE_peak_520	630	140	110	64	24	2.74192	2.43379	1.77844
PotentialPeaks_FAIRE_peak_521	374	79	61	33	9	2.34143	2.03836	1.38628
PotentialPeaks_FAIRE_peak_522	273	11	13	7	16	0.370845	0.473939	0.13952
PotentialPeaks_FAIRE_peak_523	154	14	11	4	2	0.852912	0.700909	0.267949
PotentialPeaks_FAIRE_peak_524	708	90	85	27	8	2.52316	2.45345	1.2215
PotentialPeaks_FAIRE_peak_525	231	30	28	13	17	1.1186	1.05447	0.453018
PotentialPeaks_FAIRE_peak_526	153	6	15	3	5	0.328092	0.822857	0.116588
PotentialPeaks_FAIRE_peak_527	201	13	9	11	4	0.75197	0.537845	0.648877
PotentialPeaks_FAIRE_peak_528	181	14	6	3	5	0.775551	0.328092	0.116588
PotentialPeaks_FAIRE_peak_529	273	20	33	11	17	0.764962	1.20975	0.349924
PotentialPeaks_FAIRE_peak_530	153	8	4	14	6	0.428731	0.165697	0.750659
PotentialPeaks_FAIRE_peak_531	197	12	12	10	7	0.626654	0.626654	0.519739
PotentialPeaks_FAIRE_peak_532	210	17	8	13	16	0.660352	0.20092	0.473939
PotentialPeaks_FAIRE_peak_533	153	6	7	3	2	0.405453	0.469583	0.193949
PotentialPeaks_FAIRE_peak_534	196	8	8	9	1	0.557721	0.557721	0.616614
PotentialPeaks_FAIRE_peak_535	171	6	11	9	8	0.254669	0.550125	0.439094
PotentialPeaks_FAIRE_peak_536	159	12	8	2	6	0.651124	0.428731	0.0136936
PotentialPeaks_FAIRE_peak_537	182	19	13	9	4	1.02327	0.75197	0.537845
PotentialPeaks_FAIRE_peak_538	179	12	11	5	11	0.532726	0.480259	0.117689
PotentialPeaks_FAIRE_peak_539	154	8	12	3	9	0.356533	0.578926	0.0194984
PotentialPeaks_FAIRE_peak_540	274	26	15	7	13	1.07292	0.634802	0.204167
PotentialPeaks_FAIRE_peak_541	163	14	10	9	6	0.750659	0.544208	0.487625
PotentialPeaks_FAIRE_peak_542	156	14	6	5	6	0.750659	0.3032	0.236086
PotentialPeaks_FAIRE_peak_543	252	6	16	16	13	0.140037	0.680605	0.680605
PotentialPeaks_FAIRE_peak_544	321	31	29	15	15	1.19178	1.12904	0.591383
PotentialPeaks_FAIRE_peak_545	225	28	16	13	11	1.1848	0.725371	0.583352
PotentialPeaks_FAIRE_peak_546	171	16	2	11	5	0.86866	0.0385853	0.623548
PotentialPeaks_FAIRE_peak_547	217	8	14	8	22	0.0797165	0.401645	0.0797165
PotentialPeaks_FAIRE_peak_548	155	13	7	7	3	0.777752	0.443332	0.443332
PotentialPeaks_FAIRE_peak_549	176	7	13	8	4	0.417551	0.75197	0.478952
PotentialPeaks_FAIRE_peak_550	162	16	9	4	11	0.725371	0.369228	0.0472994
PotentialPeaks_FAIRE_peak_551	171	17	12	2	5	0.913054	0.676015	0.0385853
PotentialPeaks_FAIRE_peak_552	167	7	5	9	3	0.443332	0.312088	0.563627
PotentialPeaks_FAIRE_peak_553	289	17	19	22	18	0.618809	0.703698	0.822342
PotentialPeaks_FAIRE_peak_554	245	14	14	7	13	0.587496	0.587496	0.204167
PotentialPeaks_FAIRE_peak_555	235	5	13	13	12	0.0951322	0.560796	0.560796
PotentialPeaks_FAIRE_peak_556	170	17	16	9	10	0.79268	0.748286	0.392142
PotentialPeaks_FAIRE_peak_557	176	11	7	7	6	0.598656	0.367331	0.367331
PotentialPeaks_FAIRE_peak_558	153	12	6	5	8	0.602593	0.254669	0.187555
PotentialPeaks_FAIRE_peak_559	210	17	5	8	4	0.938383	0.286307	0.478952
PotentialPeaks_FAIRE_peak_560	290	35	29	5	16	1.28838	1.10781	0.00827533
PotentialPeaks_FAIRE_peak_561	225	29	19	7	14	1.15059	0.788016	0.182295
PotentialPeaks_FAIRE_peak_562	184	24	8	7	15	0.959115	0.222149	0.160749
PotentialPeaks_FAIRE_peak_563	204	12	17	7	5	0.676015	0.913054	0.392222
PotentialPeaks_FAIRE_peak_564	258	50	31	6	14	1.70313	1.21332	0.118164
PotentialPeaks_FAIRE_peak_565	194	12	8	12	8	0.602593	0.3802	0.602593
PotentialPeaks_FAIRE_peak_566	404	49	59	13	19	1.57645	1.7829	0.412064
PotentialPeaks_FAIRE_peak_567	216	26	13	16	14	1.05105	0.516714	0.658733
PotentialPeaks_FAIRE_peak_568	203	20	14	9	9	0.941496	0.678462	0.415427
PotentialPeaks_FAIRE_peak_569	348	14	20	17	16	0.522849	0.785883	0.660352
PotentialPeaks_FAIRE_peak_570	220	13	16	12	17	0.453018	0.595037	0.402392
PotentialPeaks_FAIRE_peak_571	189	11	15	10	2	0.700909	0.900217	0.646461
PotentialPeaks_FAIRE_peak_572	451	72	54	35	32	1.77238	1.44223	0.985377
PotentialPeaks_FAIRE_peak_573	211	24	21	15	20	0.855963	0.743488	0.488231
PotentialPeaks_FAIRE_peak_574	305	22	19	10	11	0.973299	0.854654	0.425811
PotentialPeaks_FAIRE_peak_575	153	13	13	3	3	0.777752	0.777752	0.167698
PotentialPeaks_FAIRE_peak_576	269	29	21	14	7	1.31115	1.02875	0.72619
PotentialPeaks_FAIRE_peak_577	703	146	134	42	23	2.81536	2.70433	1.33349
PotentialPeaks_FAIRE_peak_578	270	34	36	17	16	1.25981	1.3164	0.660352
PotentialPeaks_FAIRE_peak_579	211	16	8	19	9	0.771571	0.356533	0.900854
PotentialPeaks_FAIRE_peak_580	237	25	19	14	10	1.10584	0.877569	0.655177
PotentialPeaks_FAIRE_peak_581	267	22	11	9	10	0.996214	0.503174	0.392142
PotentialPeaks_FAIRE_peak_582	223	24	7	5	5	1.19059	0.392222	0.260978
PotentialPeaks_FAIRE_peak_583	172	8	10	4	4	0.478952	0.594429	0.215917
PotentialPeaks_FAIRE_peak_584	253	13	19	13	13	0.538586	0.809888	0.538586
PotentialPeaks_FAIRE_peak_585	333	61	59	21	8	2.06202	2.02406	1.00469
PotentialPeaks_FAIRE_peak_586	216	29	13	6	12	1.19467	0.560796	0.162246
PotentialPeaks_FAIRE_peak_587	359	73	51	19	7	2.29503	1.88539	0.948582
PotentialPeaks_FAIRE_peak_588	192	17	15	12	7	0.863693	0.773495	0.626654
PotentialPeaks_FAIRE_peak_589	159	20	11	4	3	1.0897	0.674658	0.241699
PotentialPeaks_FAIRE_peak_590	210	11	12	14	10	0.503174	0.555641	0.655177
PotentialPeaks_FAIRE_peak_591	203	16	17	12	7	0.819299	0.863693	0.626654
PotentialPeaks_FAIRE_peak_592	308	27	36	28	27	0.827256	1.10143	0.860423
PotentialPeaks_FAIRE_peak_593	397	93	86	33	13	2.44879	2.35303	1.29532
PotentialPeaks_FAIRE_peak_594	514	40	49	17	27	1.20835	1.42336	0.445385
PotentialPeaks_FAIRE_peak_595	369	98	64	19	4	2.72688	2.21592	1.02327
PotentialPeaks_FAIRE_peak_596	398	37	32	14	10	1.47621	1.33325	0.655177
PotentialPeaks_FAIRE_peak_597	209	19	14	8	6	0.973052	0.750659	0.428731
PotentialPeaks_FAIRE_peak_598	193	16	7	2	5	0.86866	0.392222	0.0385853
PotentialPeaks_FAIRE_peak_599	230	30	26	16	11	1.24893	1.11769	0.725371
PotentialPeaks_FAIRE_peak_600	194	19	4	4	5	0.997943	0.190588	0.190588
PotentialPeaks_FAIRE_peak_601	515	40	43	13	22	1.30211	1.3774	0.352735
PotentialPeaks_FAIRE_peak_602	252	20	18	13	17	0.764962	0.6825	0.453018
PotentialPeaks_FAIRE_peak_603	153	14	11	4	7	0.72619	0.574187	0.141227
PotentialPeaks_FAIRE_peak_604	321	21	35	18	22	0.704207	1.16718	0.582217
PotentialPeaks_FAIRE_peak_605	199	14	5	6	9	0.678462	0.163888	0.231003
PotentialPeaks_FAIRE_peak_606	342	38	28	6	17	1.34992	1.05447	0.0544685
PotentialPeaks_FAIRE_peak_607	195	19	12	8	2	1.0753	0.753376	0.530984
PotentialPeaks_FAIRE_peak_608	244	38	24	7	4	1.64888	1.21592	0.417551
PotentialPeaks_FAIRE_peak_609	331	32	19	9	13	1.26557	0.809888	0.324462
PotentialPeaks_FAIRE_peak_610	439	62	35	18	20	1.81944	1.20646	0.621497
PotentialPeaks_FAIRE_peak_611	189	12	12	10	6	0.651124	0.651124	0.544208
PotentialPeaks_FAIRE_peak_612	218	15	9	7	17	0.549233	0.238893	0.118599
PotentialPeaks_FAIRE_peak_613	157	9	7	12	6	0.487625	0.367331	0.651124
PotentialPeaks_FAIRE_peak_614	200	13	10	7	13	0.538586	0.381045	0.204167
PotentialPeaks_FAIRE_peak_615	197	25	11	9	3	1.27732	0.674658	0.563627
PotentialPeaks_FAIRE_peak_616	297	42	42	18	24	1.3145	1.3145	0.543977
PotentialPeaks_FAIRE_peak_617	200	31	9	23	19	1.10867	0.19794	0.839486
PotentialPeaks_FAIRE_peak_618	208	14	17	8	10	0.655177	0.79268	0.333249
PotentialPeaks_FAIRE_peak_619	153	10	8	7	8	0.495677	0.3802	0.3188
PotentialPeaks_FAIRE_peak_620	211	21	9	6	10	0.95774	0.392142	0.207718
PotentialPeaks_FAIRE_peak_621	153	12	9	2	12	0.51017	0.346671	-0.12726
PotentialPeaks_FAIRE_peak_622	524	49	58	25	32	1.33532	1.52241	0.670504
PotentialPeaks_FAIRE_peak_623	305	28	20	15	25	0.8972	0.607693	0.391965
PotentialPeaks_FAIRE_peak_624	212	11	10	19	15	0.392074	0.337627	0.76647
PotentialPeaks_FAIRE_peak_625	199	20	12	14	12	0.87274	0.51017	0.609705
PotentialPeaks_FAIRE_peak_626	265	32	11	5	13	1.26557	0.435493	0.0729228
PotentialPeaks_FAIRE_peak_627	251	28	22	14	31	0.789567	0.578063	0.237026
PotentialPeaks_FAIRE_peak_628	153	6	8	9	4	0.353421	0.478952	0.537845
PotentialPeaks_FAIRE_peak_629	273	17	7	13	20	0.578429	0.0575966	0.392016
PotentialPeaks_FAIRE_peak_630	160	17	12	3	11	0.769765	0.532726	-0.0267012
PotentialPeaks_FAIRE_peak_631	229	23	11	10	5	1.15406	0.623548	0.5691
PotentialPeaks_FAIRE_peak_632	209	20	19	24	20	0.70396	0.663318	0.855963
PotentialPeaks_FAIRE_peak_633	350	23	42	15	31	0.615537	1.18812	0.284331
PotentialPeaks_FAIRE_peak_634	211	23	12	4	9	1.05697	0.578926	0.093499
PotentialPeaks_FAIRE_peak_635	230	27	21	3	7	1.24556	1.02875	0.0672266
PotentialPeaks_FAIRE_peak_636	178	11	13	7	4	0.648877	0.75197	0.417551
PotentialPeaks_FAIRE_peak_637	217	16	19	3	7	0.819299	0.948582	0.0672266
PotentialPeaks_FAIRE_peak_638	282	31	13	7	6	1.39836	0.70175	0.367331
PotentialPeaks_FAIRE_peak_639	224	14	16	9	15	0.544077	0.637187	0.281043
PotentialPeaks_FAIRE_peak_640	153	21	3	4	6	1.05322	0.0916961	0.165697
PotentialPeaks_FAIRE_peak_641	232	29	7	8	14	1.15059	0.182295	0.243695
PotentialPeaks_FAIRE_peak_642	167	16	9	2	5	0.86866	0.512517	0.0385853
PotentialPeaks_FAIRE_peak_643	196	17	6	6	5	0.913054	0.328092	0.328092
PotentialPeaks_FAIRE_peak_644	167	7	12	10	8	0.3188	0.602593	0.495677
PotentialPeaks_FAIRE_peak_645	804	243	152	60	57	2.9557	2.33121	1.18682
PotentialPeaks_FAIRE_peak_646	191	12	9	7	22	0.302109	0.13861	0.0183159
PotentialPeaks_FAIRE_peak_647	161	13	10	10	3	0.777752	0.62021	0.62021
PotentialPeaks_FAIRE_peak_648	184	13	3	8	14	0.516714	-0.0933397	0.243695
PotentialPeaks_FAIRE_peak_649	191	10	10	16	20	0.234474	0.234474	0.534035
PotentialPeaks_FAIRE_peak_650	218	20	15	12	3	1.0897	0.873967	0.727125
PotentialPeaks_FAIRE_peak_651	265	14	26	15	24	0.363405	0.848832	0.410711
PotentialPeaks_FAIRE_peak_652	166	12	9	9	12	0.51017	0.346671	0.346671
PotentialPeaks_FAIRE_peak_653	251	11	8	17	13	0.435493	0.265568	0.725
PotentialPeaks_FAIRE_peak_654	645	71	49	22	35	1.70554	1.28496	0.510524
PotentialPeaks_FAIRE_peak_655	168	13	8	5	5	0.726641	0.453623	0.260978
PotentialPeaks_FAIRE_peak_656	264	29	23	19	11	1.21722	1.01077	0.854654
PotentialPeaks_FAIRE_peak_657	169	13	9	10	15	0.495168	0.281043	0.337627
PotentialPeaks_FAIRE_peak_658	186	14	8	6	9	0.678462	0.356533	0.231003
PotentialPeaks_FAIRE_peak_659	387	62	30	15	20	1.81944	1.0576	0.488231
PotentialPeaks_FAIRE_peak_660	160	13	8	7	4	0.75197	0.478952	0.417551
PotentialPeaks_FAIRE_peak_661	254	20	14	7	14	0.828658	0.565623	0.182295
PotentialPeaks_FAIRE_peak_662	209	17	18	6	6	0.888163	0.931231	0.3032
PotentialPeaks_FAIRE_peak_663	168	14	7	5	6	0.750659	0.367331	0.236086
PotentialPeaks_FAIRE_peak_664	153	18	7	7	7	0.906762	0.342861	0.342861
PotentialPeaks_FAIRE_peak_665	282	34	22	11	7	1.46316	1.06723	0.574187
PotentialPeaks_FAIRE_peak_666	367	30	36	9	18	1.09798	1.27485	0.218271
PotentialPeaks_FAIRE_peak_667	170	23	11	3	7	1.1047	0.574187	0.0672266
PotentialPeaks_FAIRE_peak_668	281	39	27	9	1	1.75412	1.39902	0.616614
PotentialPeaks_FAIRE_peak_669	195	22	11	7	8	1.04317	0.550125	0.3188
PotentialPeaks_FAIRE_peak_670	234	23	19	10	19	0.839486	0.683366	0.254523
PotentialPeaks_FAIRE_peak_671	175	11	11	3	3	0.674658	0.674658	0.167698
PotentialPeaks_FAIRE_peak_672	207	15	9	8	6	0.797965	0.487625	0.428731
PotentialPeaks_FAIRE_peak_673	154	5	6	9	9	0.163888	0.231003	0.415427
PotentialPeaks_FAIRE_peak_674	263	19	18	9	6	0.973052	0.931231	0.487625
PotentialPeaks_FAIRE_peak_675	166	11	13	3	10	0.503174	0.606267	-0.00378629
PotentialPeaks_FAIRE_peak_676	839	112	110	59	60	1.89988	1.87716	1.1287
PotentialPeaks_FAIRE_peak_677	176	20	23	2	7	0.989224	1.1047	-0.010776
PotentialPeaks_FAIRE_peak_678	180	10	12	7	6	0.544208	0.651124	0.367331
PotentialPeaks_FAIRE_peak_679	203	20	16	5	5	1.03859	0.86866	0.260978
PotentialPeaks_FAIRE_peak_680	393	55	32	6	7	1.96905	1.40426	0.278731
PotentialPeaks_FAIRE_peak_681	169	11	13	4	7	0.574187	0.67728	0.141227
PotentialPeaks_FAIRE_peak_682	711	63	65	43	28	1.68673	1.7228	1.26559
PotentialPeaks_FAIRE_peak_683	153	2	13	1	7	-0.010776	0.67728	-0.0932381
PotentialPeaks_FAIRE_peak_684	376	85	51	18	18	2.23263	1.6405	0.661878
PotentialPeaks_FAIRE_peak_685	366	30	30	21	17	1.1186	1.1186	0.80449
PotentialPeaks_FAIRE_peak_686	153	10	6	2	5	0.5691	0.328092	0.0385853
PotentialPeaks_FAIRE_peak_687	192	11	10	7	9	0.526458	0.472011	0.295133
PotentialPeaks_FAIRE_peak_688	802	103	77	25	33	2.19079	1.83513	0.653523
PotentialPeaks_FAIRE_peak_689	190	32	13	17	22	1.07972	0.352735	0.539148
PotentialPeaks_FAIRE_peak_690	206	23	31	13	20	0.819437	1.08862	0.392016
PotentialPeaks_FAIRE_peak_691	153	21	20	6	8	1.00469	0.965163	0.254669
PotentialPeaks_FAIRE_peak_692	530	146	99	42	14	2.99858	2.50422	1.51671
PotentialPeaks_FAIRE_peak_693	303	45	24	20	37	1.16071	0.551906	0.399903
PotentialPeaks_FAIRE_peak_694	548	79	46	9	22	2.06461	1.44895	0.13861
PotentialPeaks_FAIRE_peak_695	153	25	9	4	9	1.12912	0.415427	0.093499
PotentialPeaks_FAIRE_peak_696	206	27	21	14	10	1.17455	0.95774	0.655177
PotentialPeaks_FAIRE_peak_697	195	14	9	10	1	0.879649	0.616614	0.673198
PotentialPeaks_FAIRE_peak_698	160	3	19	5	3	0.167698	1.04905	0.312088
PotentialPeaks_FAIRE_peak_699	190	20	12	12	17	0.764962	0.402392	0.402392
PotentialPeaks_FAIRE_peak_700	212	6	13	15	10	0.207718	0.606267	0.702483
PotentialPeaks_FAIRE_peak_701	192	18	8	5	4	0.981452	0.478952	0.286307
PotentialPeaks_FAIRE_peak_702	806	165	106	71	37	2.72982	2.16071	1.67292
PotentialPeaks_FAIRE_peak_703	229	27	11	13	24	0.882779	0.211402	0.314495
PotentialPeaks_FAIRE_peak_704	257	30	33	14	24	0.980076	1.07122	0.363405
PotentialPeaks_FAIRE_peak_705	662	72	72	27	43	1.59576	1.59576	0.562589
PotentialPeaks_FAIRE_peak_706	238	21	24	4	9	0.981024	1.0935	0.093499
PotentialPeaks_FAIRE_peak_707	198	20	8	15	15	0.807112	0.222149	0.591383
PotentialPeaks_FAIRE_peak_708	164	14	5	4	5	0.775551	0.260978	0.190588
PotentialPeaks_FAIRE_peak_709	153	20	4	3	2	1.11595	0.267949	0.193949
PotentialPeaks_FAIRE_peak_710	323	29	39	12	18	1.06627	1.35577	0.38177
PotentialPeaks_FAIRE_peak_711	231	26	22	6	8	1.18756	1.04317	0.254669
PotentialPeaks_FAIRE_peak_712	540	67	103	39	32	1.68799	2.20777	1.09431
PotentialPeaks_FAIRE_peak_713	225	21	14	5	8	1.00469	0.702128	0.187555
PotentialPeaks_FAIRE_peak_714	200	15	13	14	7	0.773495	0.67728	0.72619
PotentialPeaks_FAIRE_peak_715	389	69	48	16	18	1.98381	1.57441	0.574415
PotentialPeaks_FAIRE_peak_716	719	60	49	25	24	1.70444	1.47888	0.814066
PotentialPeaks_FAIRE_peak_717	169	10	9	9	6	0.544208	0.487625	0.487625
PotentialPeaks_FAIRE_peak_718	250	13	15	7	16	0.473939	0.570154	0.13952
PotentialPeaks_FAIRE_peak_719	322	14	21	10	10	0.655177	0.95774	0.448726
PotentialPeaks_FAIRE_peak_720	310	51	31	20	29	1.43122	0.919717	0.535053
PotentialPeaks_FAIRE_peak_721	244	16	10	11	16	0.615958	0.316398	0.370845
PotentialPeaks_FAIRE_peak_722	271	51	30	14	14	1.72482	1.18229	0.565623
PotentialPeaks_FAIRE_peak_723	498	71	46	19	30	1.79047	1.30172	0.476809
PotentialPeaks_FAIRE_peak_724	254	40	23	10	5	1.67602	1.15406	0.5691
PotentialPeaks_FAIRE_peak_725	239	19	13	6	9	0.900854	0.629552	0.231003
PotentialPeaks_FAIRE_peak_726	512	22	30	23	27	0.648919	0.924553	0.686393
PotentialPeaks_FAIRE_peak_727	391	37	34	13	19	1.282	1.19794	0.412064
PotentialPeaks_FAIRE_peak_728	292	23	13	10	12	0.988217	0.560796	0.403254
PotentialPeaks_FAIRE_peak_729	153	6	8	5	8	0.254669	0.3802	0.187555
PotentialPeaks_FAIRE_peak_730	572	31	26	50	17	1.14963	0.987354	1.63943
PotentialPeaks_FAIRE_peak_731	194	17	4	14	12	0.747209	0.0247428	0.609705
PotentialPeaks_FAIRE_peak_732	171	7	3	7	3	0.443332	0.167698	0.443332
PotentialPeaks_FAIRE_peak_733	289	6	16	19	12	0.162246	0.702815	0.832098
PotentialPeaks_FAIRE_peak_734	586	167	151	60	18	3.09011	2.95812	1.82234
PotentialPeaks_FAIRE_peak_735	243	33	21	8	10	1.363	0.95774	0.333249
PotentialPeaks_FAIRE_peak_736	654	172	160	70	37	2.78457	2.68941	1.65624
PotentialPeaks_FAIRE_peak_737	222	18	9	15	23	0.56297	0.119364	0.429704
PotentialPeaks_FAIRE_peak_738	490	117	109	34	23	2.53079	2.44129	1.11936
PotentialPeaks_FAIRE_peak_739	410	140	90	70	22	2.78016	2.22267	1.92102
PotentialPeaks_FAIRE_peak_740	518	110	64	23	19	2.53136	1.87601	0.839486
PotentialPeaks_FAIRE_peak_741	851	150	122	51	35	2.63764	2.37112	1.32869
PotentialPeaks_FAIRE_peak_742	168	9	6	17	12	0.346671	0.162246	0.747209
PotentialPeaks_FAIRE_peak_743	290	50	20	10	15	1.68158	0.807112	0.337627
PotentialPeaks_FAIRE_peak_744	472	39	25	14	11	1.50673	1.08292	0.632262
PotentialPeaks_FAIRE_peak_745	166	15	10	5	11	0.679568	0.425811	0.117689
PotentialPeaks_FAIRE_peak_746	169	9	5	18	19	0.19794	-0.0535991	0.641546
PotentialPeaks_FAIRE_peak_747	157	6	9	6	14	0.118164	0.302589	0.118164
PotentialPeaks_FAIRE_peak_748	179	13	11	9	11	0.583352	0.480259	0.369228
PotentialPeaks_FAIRE_peak_749	254	14	11	25	28	0.289839	0.137836	0.7405
PotentialPeaks_FAIRE_peak_750	355	36	20	12	27	1.10143	0.570916	0.208346
PotentialPeaks_FAIRE_peak_751	712	122	113	82	51	2.12874	2.03145	1.63493
PotentialPeaks_FAIRE_peak_752	187	15	12	5	12	0.657011	0.51017	0.0951322
PotentialPeaks_FAIRE_peak_753	172	16	12	8	25	0.437768	0.245123	0.0227307
PotentialPeaks_FAIRE_peak_754	447	30	33	15	16	1.13952	1.23067	0.570154
PotentialPeaks_FAIRE_peak_755	266	38	20	8	9	1.52646	0.941496	0.356533
PotentialPeaks_FAIRE_peak_756	268	23	20	12	9	1.05697	0.941496	0.578926
PotentialPeaks_FAIRE_peak_757	153	8	14	2	5	0.453623	0.775551	0.0385853
PotentialPeaks_FAIRE_peak_758	153	2	11	7	9	-0.0585041	0.526458	0.295133
PotentialPeaks_FAIRE_peak_759	153	6	4	13	4	0.353421	0.215917	0.75197
PotentialPeaks_FAIRE_peak_760	675	189	143	56	20	3.21351	2.84692	1.70396
PotentialPeaks_FAIRE_peak_761	160	10	8	5	12	0.403254	0.287777	0.0951322
PotentialPeaks_FAIRE_peak_762	169	4	8	15	13	0.00253348	0.265568	0.634802
PotentialPeaks_FAIRE_peak_763	217	11	12	9	9	0.526458	0.578926	0.415427
PotentialPeaks_FAIRE_peak_764	167	10	7	9	20	0.234474	0.0575966	0.177891
PotentialPeaks_FAIRE_peak_765	189	6	9	4	8	0.254669	0.439094	0.117166
PotentialPeaks_FAIRE_peak_766	308	85	85	66	115	0.983689	0.983689	0.683029
PotentialPeaks_FAIRE_peak_767	919	136	101	39	28	2.63088	2.25331	1.16431
PotentialPeaks_FAIRE_peak_768	153	7	8	3	4	0.417551	0.478952	0.141917
PotentialPeaks_FAIRE_peak_769	174	17	8	9	5	0.913054	0.453623	0.512517
PotentialPeaks_FAIRE_peak_770	164	10	10	6	5	0.5691	0.5691	0.328092
PotentialPeaks_FAIRE_peak_771	255	27	22	38	26	0.845527	0.66719	1.17415
PotentialPeaks_FAIRE_peak_772	209	24	8	7	14	0.980661	0.243695	0.182295
PotentialPeaks_FAIRE_peak_773	760	173	146	68	53	2.55484	2.33245	1.38491
PotentialPeaks_FAIRE_peak_774	153	15	9	3	5	0.822857	0.512517	0.116588
PotentialPeaks_FAIRE_peak_775	294	19	17	6	15	0.76647	0.681581	0.0966184
PotentialPeaks_FAIRE_peak_776	153	9	7	7	8	0.439094	0.3188	0.3188
PotentialPeaks_FAIRE_peak_777	432	50	43	25	29	1.40952	1.24777	0.72268
PotentialPeaks_FAIRE_peak_778	153	9	11	4	7	0.463155	0.574187	0.141227
PotentialPeaks_FAIRE_peak_779	236	14	19	12	13	0.587496	0.809888	0.48796
PotentialPeaks_FAIRE_peak_780	186	8	12	19	18	0.159377	0.38177	0.703698
PotentialPeaks_FAIRE_peak_781	265	27	20	19	25	0.864033	0.607693	0.567051
PotentialPeaks_FAIRE_peak_782	268	38	17	23	18	1.3293	0.618809	0.859817
PotentialPeaks_FAIRE_peak_783	195	7	13	7	6	0.367331	0.70175	0.367331
PotentialPeaks_FAIRE_peak_784	601	63	37	6	31	1.63392	1.05806	-0.210433
PotentialPeaks_FAIRE_peak_785	689	119	74	39	35	2.33941	1.75445	1.04396
PotentialPeaks_FAIRE_peak_786	161	13	9	9	10	0.606267	0.392142	0.392142
PotentialPeaks_FAIRE_peak_787	168	10	12	4	6	0.544208	0.651124	0.165697
PotentialPeaks_FAIRE_peak_788	171	11	6	2	6	0.598656	0.3032	0.0136936
PotentialPeaks_FAIRE_peak_789	335	59	35	13	14	1.88755	1.33116	0.516714
PotentialPeaks_FAIRE_peak_790	194	11	10	15	9	0.526458	0.472011	0.725767
PotentialPeaks_FAIRE_peak_791	169	5	2	16	10	0.140604	-0.0817888	0.748286
PotentialPeaks_FAIRE_peak_792	194	20	8	10	6	1.01369	0.428731	0.544208
PotentialPeaks_FAIRE_peak_793	287	20	17	13	7	0.989224	0.863693	0.67728
PotentialPeaks_FAIRE_peak_794	153	10	5	10	4	0.594429	0.286307	0.594429
PotentialPeaks_FAIRE_peak_795	470	143	116	65	28	2.69583	2.42734	1.7228
PotentialPeaks_FAIRE_peak_796	485	90	52	27	17	2.32296	1.6825	1.0213
PotentialPeaks_FAIRE_peak_797	181	7	13	6	9	0.295133	0.629552	0.231003
PotentialPeaks_FAIRE_peak_798	263	38	28	17	19	1.30897	1.01352	0.598478
PotentialPeaks_FAIRE_peak_799	185	20	13	7	4	1.06391	0.75197	0.417551
PotentialPeaks_FAIRE_peak_800	702	170	139	58	21	3.05342	2.79039	1.72371
PotentialPeaks_FAIRE_peak_801	153	8	9	9	9	0.356533	0.415427	0.415427
PotentialPeaks_FAIRE_peak_802	239	20	19	12	20	0.70396	0.663318	0.34139
PotentialPeaks_FAIRE_peak_803	170	7	13	4	10	0.271848	0.606267	0.0702143
PotentialPeaks_FAIRE_peak_804	158	8	10	0	8	0.3802	0.495677	-0.204762
PotentialPeaks_FAIRE_peak_805	165	8	12	8	6	0.428731	0.651124	0.428731
PotentialPeaks_FAIRE_peak_806	192	7	13	6	17	0.118599	0.453018	0.0544685
PotentialPeaks_FAIRE_peak_807	174	10	7	8	6	0.544208	0.367331	0.428731
PotentialPeaks_FAIRE_peak_808	270	12	18	10	13	0.48796	0.768068	0.381045
PotentialPeaks_FAIRE_peak_809	442	99	68	25	16	2.46145	2.00828	0.97351
PotentialPeaks_FAIRE_peak_810	226	37	21	7	13	1.40853	0.890059	0.204167
PotentialPeaks_FAIRE_peak_811	155	14	8	2	12	0.609705	0.287777	-0.12726
PotentialPeaks_FAIRE_peak_812	153	8	9	3	10	0.333249	0.392142	-0.00378629
PotentialPeaks_FAIRE_peak_813	223	11	21	12	3	0.674658	1.12922	0.727125
PotentialPeaks_FAIRE_peak_814	183	6	9	9	17	0.0544685	0.238893	0.238893
PotentialPeaks_FAIRE_peak_815	193	9	12	8	7	0.463155	0.626654	0.404262
PotentialPeaks_FAIRE_peak_816	293	21	13	8	8	1.00469	0.653219	0.3802
PotentialPeaks_FAIRE_peak_817	645	179	128	56	21	3.12159	2.68419	1.68419
PotentialPeaks_FAIRE_peak_818	211	17	11	2	8	0.839632	0.550125	-0.0348374
PotentialPeaks_FAIRE_peak_819	225	12	8	7	6	0.651124	0.428731	0.367331
PotentialPeaks_FAIRE_peak_820	159	6	4	7	16	0.0753895	-0.062114	0.13952
PotentialPeaks_FAIRE_peak_821	301	24	17	16	18	0.896343	0.618809	0.574415
PotentialPeaks_FAIRE_peak_822	225	13	9	11	14	0.516714	0.302589	0.41362
PotentialPeaks_FAIRE_peak_823	183	6	8	12	18	0.0338465	0.159377	0.38177
PotentialPeaks_FAIRE_peak_824	274	13	10	13	17	0.453018	0.295477	0.453018
PotentialPeaks_FAIRE_peak_825	153	9	7	3	7	0.463155	0.342861	0.0672266
PotentialPeaks_FAIRE_peak_826	153	9	7	5	2	0.589877	0.469583	0.338338
PotentialPeaks_FAIRE_peak_827	201	4	8	13	16	-0.062114	0.20092	0.473939
PotentialPeaks_FAIRE_peak_828	461	85	113	34	28	2.04116	2.39418	1.0268
PotentialPeaks_FAIRE_peak_829	525	48	60	22	32	1.31295	1.56088	0.560879
PotentialPeaks_FAIRE_peak_830	358	86	63	39	12	2.37524	2.0066	1.48417
PotentialPeaks_FAIRE_peak_831	160	15	9	5	3	0.873967	0.563627	0.312088
PotentialPeaks_FAIRE_peak_832	295	59	31	15	0	2.22882	1.55459	0.954196
PotentialPeaks_FAIRE_peak_833	407	55	29	25	32	1.4627	0.804805	0.670504
PotentialPeaks_FAIRE_peak_834	153	13	8	6	6	0.70175	0.428731	0.3032
PotentialPeaks_FAIRE_peak_835	179	13	8	9	13	0.538586	0.265568	0.324462
PotentialPeaks_FAIRE_peak_836	203	5	8	22	25	-0.169914	0.0227307	0.685696
PotentialPeaks_FAIRE_peak_837	189	13	12	7	15	0.495168	0.444542	0.160749
PotentialPeaks_FAIRE_peak_838	153	13	10	3	5	0.726641	0.5691	0.116588
PotentialPeaks_FAIRE_peak_839	155	9	5	9	3	0.563627	0.312088	0.563627
PotentialPeaks_FAIRE_peak_840	163	5	7	9	3	0.312088	0.443332	0.563627
PotentialPeaks_FAIRE_peak_841	391	29	30	12	15	1.12904	1.16075	0.444542
PotentialPeaks_FAIRE_peak_842	165	17	12	3	9	0.815965	0.578926	0.0194984
PotentialPeaks_FAIRE_peak_843	852	138	119	89	36	2.51298	2.32301	1.96044
PotentialPeaks_FAIRE_peak_844	371	39	31	13	30	1.12889	0.902114	0.205507
PotentialPeaks_FAIRE_peak_845	153	11	8	7	9	0.526458	0.356533	0.295133
PotentialPeaks_FAIRE_peak_846	691	76	94	44	40	1.70595	1.96375	1.08928
PotentialPeaks_FAIRE_peak_847	265	34	20	15	30	0.991382	0.517451	0.301722
PotentialPeaks_FAIRE_peak_848	165	8	7	5	8	0.3802	0.3188	0.187555
PotentialPeaks_FAIRE_peak_849	153	11	6	12	7	0.574187	0.278731	0.626654
PotentialPeaks_FAIRE_peak_850	182	12	3	9	10	0.555641	-0.00378629	0.392142
PotentialPeaks_FAIRE_peak_851	153	5	12	9	10	0.140604	0.555641	0.392142
PotentialPeaks_FAIRE_peak_852	153	14	9	4	10	0.655177	0.392142	0.0702143
PotentialPeaks_FAIRE_peak_853	607	70	48	18	13	2.10687	1.68061	0.768068
PotentialPeaks_FAIRE_peak_854	175	19	14	4	7	0.948582	0.72619	0.141227
PotentialPeaks_FAIRE_peak_855	428	115	96	49	17	2.62846	2.40239	1.6174
PotentialPeaks_FAIRE_peak_856	397	114	89	62	16	2.63833	2.3302	1.90136
PotentialPeaks_FAIRE_peak_857	614	173	161	81	9	3.33381	3.23918	2.37148
PotentialPeaks_FAIRE_peak_858	154	16	18	3	5	0.86866	0.956123	0.116588
PotentialPeaks_FAIRE_peak_859	509	100	82	41	24	2.3145	2.07122	1.2894
PotentialPeaks_FAIRE_peak_860	389	27	30	9	22	0.921019	1.01832	0.13861
PotentialPeaks_FAIRE_peak_861	161	14	7	7	6	0.750659	0.367331	0.367331
PotentialPeaks_FAIRE_peak_862	155	8	8	4	7	0.404262	0.404262	0.141227
PotentialPeaks_FAIRE_peak_863	191	10	16	7	5	0.5691	0.86866	0.392222
PotentialPeaks_FAIRE_peak_864	201	22	4	1	5	1.11659	0.190588	-0.0438768
PotentialPeaks_FAIRE_peak_865	416	107	78	42	25	2.38028	1.99236	1.29575
PotentialPeaks_FAIRE_peak_866	304	48	33	14	13	1.68061	1.29532	0.587496
PotentialPeaks_FAIRE_peak_867	407	94	71	30	11	2.50673	2.16831	1.24893
PotentialPeaks_FAIRE_peak_868	199	18	8	7	9	0.859034	0.356533	0.295133
PotentialPeaks_FAIRE_peak_869	224	14	5	4	15	0.544077	0.0295042	-0.0408851
PotentialPeaks_FAIRE_peak_870	153	11	9	5	8	0.550125	0.439094	0.187555
PotentialPeaks_FAIRE_peak_871	205	10	9	5	10	0.448726	0.392142	0.140604
PotentialPeaks_FAIRE_peak_872	257	19	16	11	19	0.683366	0.554083	0.308971
PotentialPeaks_FAIRE_peak_873	374	53	26	15	29	1.47365	0.757446	0.319324
PotentialPeaks_FAIRE_peak_874	251	31	11	6	18	1.129	0.329302	0.0338465
PotentialPeaks_FAIRE_peak_875	248	46	30	12	15	1.59138	1.16075	0.444542
PotentialPeaks_FAIRE_peak_876	210	31	14	6	17	1.14963	0.501927	0.0544685
PotentialPeaks_FAIRE_peak_877	169	15	8	2	13	0.634802	0.265568	-0.14947
PotentialPeaks_FAIRE_peak_878	284	40	32	19	23	1.28286	1.06047	0.604791
PotentialPeaks_FAIRE_peak_879	192	12	10	7	16	0.423313	0.316398	0.13952
PotentialPeaks_FAIRE_peak_880	153	8	6	11	15	0.222149	0.0966184	0.392074
PotentialPeaks_FAIRE_peak_881	214	19	11	15	13	0.809888	0.435493	0.634802
PotentialPeaks_FAIRE_peak_882	262	30	19	22	10	1.27185	0.877569	0.996214
PotentialPeaks_FAIRE_peak_883	153	9	8	13	1	0.616614	0.557721	0.830739
PotentialPeaks_FAIRE_peak_884	379	63	58	10	22	1.79853	1.70421	0.195194
PotentialPeaks_FAIRE_peak_885	204	20	10	2	4	1.06391	0.594429	0.0639141
PotentialPeaks_FAIRE_peak_886	221	22	15	8	7	1.06723	0.773495	0.404262
PotentialPeaks_FAIRE_peak_887	247	47	24	16	5	1.84594	1.19059	0.86866
PotentialPeaks_FAIRE_peak_888	174	30	14	5	5	1.39222	0.775551	0.260978
PotentialPeaks_FAIRE_peak_889	175	19	12	8	10	0.877569	0.555641	0.333249
PotentialPeaks_FAIRE_peak_890	317	47	22	12	6	1.82105	1.0917	0.651124
PotentialPeaks_FAIRE_peak_891	164	16	3	5	7	0.819299	0.0672266	0.211616
PotentialPeaks_FAIRE_peak_892	194	9	10	11	11	0.369228	0.425811	0.480259
PotentialPeaks_FAIRE_peak_893	226	33	33	11	15	1.2519	1.2519	0.392074
PotentialPeaks_FAIRE_peak_894	173	8	11	9	9	0.356533	0.526458	0.415427
PotentialPeaks_FAIRE_peak_895	320	32	31	0	16	1.20092	1.17055	-0.384042
PotentialPeaks_FAIRE_peak_896	153	8	9	2	2	0.530984	0.589877	0.115946
PotentialPeaks_FAIRE_peak_897	195	15	11	9	9	0.725767	0.526458	0.415427
PotentialPeaks_FAIRE_peak_898	238	23	26	17	11	1.01077	1.11769	0.769765
PotentialPeaks_FAIRE_peak_899	159	12	7	7	4	0.701344	0.417551	0.417551
PotentialPeaks_FAIRE_peak_900	375	77	70	36	8	2.3344	2.2215	1.49568
PotentialPeaks_FAIRE_peak_901	600	72	39	34	14	2.11816	1.44009	1.30259
PotentialPeaks_FAIRE_peak_902	405	29	24	16	24	0.948368	0.778443	0.456514
PotentialPeaks_FAIRE_peak_903	244	10	16	20	19	0.254523	0.554083	0.724008
PotentialPeaks_FAIRE_peak_904	254	36	46	17	13	1.38105	1.6348	0.725
PotentialPeaks_FAIRE_peak_905	212	25	21	10	14	1.01628	0.868186	0.359172
PotentialPeaks_FAIRE_peak_906	153	11	7	5	3	0.674658	0.443332	0.312088
PotentialPeaks_FAIRE_peak_907	289	18	21	11	22	0.582217	0.704207	0.249641
PotentialPeaks_FAIRE_peak_908	176	9	7	4	9	0.415427	0.295133	0.093499
PotentialPeaks_FAIRE_peak_909	153	9	7	3	5	0.512517	0.392222	0.116588
PotentialPeaks_FAIRE_peak_910	289	28	23	6	12	1.16225	0.988217	0.162246
PotentialPeaks_FAIRE_peak_911	153	23	5	5	5	1.15406	0.260978	0.260978
PotentialPeaks_FAIRE_peak_912	322	33	26	18	19	1.16879	0.946401	0.641546
PotentialPeaks_FAIRE_peak_913	265	16	29	12	14	0.658733	1.15059	0.466088
PotentialPeaks_FAIRE_peak_914	183	2	0	2	9	-0.0585041	-0.228429	-0.0585041
PotentialPeaks_FAIRE_peak_915	199	21	10	18	19	0.763537	0.254523	0.641546
PotentialPeaks_FAIRE_peak_916	260	18	15	8	14	0.746196	0.612929	0.243695
PotentialPeaks_FAIRE_peak_917	187	14	13	2	11	0.632262	0.583352	-0.104704
PotentialPeaks_FAIRE_peak_918	326	70	59	21	9	2.19784	2.00039	0.981024
PotentialPeaks_FAIRE_peak_919	477	115	106	52	22	2.52818	2.42549	1.58222
PotentialPeaks_FAIRE_peak_920	239	44	16	4	9	1.67846	0.771571	0.093499
PotentialPeaks_FAIRE_peak_921	173	10	10	6	2	0.646461	0.646461	0.405453
PotentialPeaks_FAIRE_peak_922	185	14	5	2	9	0.678462	0.163888	-0.0585041
PotentialPeaks_FAIRE_peak_923	224	22	15	16	15	0.885114	0.591383	0.637187
PotentialPeaks_FAIRE_peak_924	202	8	10	6	3	0.504733	0.62021	0.379202
PotentialPeaks_FAIRE_peak_925	264	62	22	15	17	1.88044	0.842964	0.549233
PotentialPeaks_FAIRE_peak_926	189	11	7	3	5	0.623548	0.392222	0.116588
PotentialPeaks_FAIRE_peak_927	176	11	6	8	8	0.550125	0.254669	0.3802
PotentialPeaks_FAIRE_peak_928	252	44	41	11	7	1.72619	1.65219	0.574187
PotentialPeaks_FAIRE_peak_929	160	9	16	4	7	0.463155	0.819299	0.141227
PotentialPeaks_FAIRE_peak_930	153	6	14	7	10	0.207718	0.655177	0.271848
PotentialPeaks_FAIRE_peak_931	301	55	53	31	12	1.85256	1.81134	1.2574
PotentialPeaks_FAIRE_peak_932	652	77	63	45	29	1.90429	1.66891	1.29587
PotentialPeaks_FAIRE_peak_933	402	105	78	39	24	2.37538	2.0111	1.23787
PotentialPeaks_FAIRE_peak_934	153	10	5	4	4	0.594429	0.286307	0.215917
PotentialPeaks_FAIRE_peak_935	563	103	65	46	32	2.20777	1.6528	1.26715
PotentialPeaks_FAIRE_peak_936	268	31	73	62	56	0.506719	1.42786	1.23753
PotentialPeaks_FAIRE_peak_937	166	10	10	6	8	0.495677	0.495677	0.254669
PotentialPeaks_FAIRE_peak_938	251	24	23	9	11	1.0473	1.01077	0.369228
PotentialPeaks_FAIRE_peak_939	153	6	7	6	6	0.3032	0.367331	0.3032
PotentialPeaks_FAIRE_peak_940	157	11	9	8	11	0.480259	0.369228	0.310334
PotentialPeaks_FAIRE_peak_941	242	19	21	7	12	0.832098	0.912268	0.226377
PotentialPeaks_FAIRE_peak_942	252	16	8	11	10	0.748286	0.333249	0.503174
PotentialPeaks_FAIRE_peak_943	247	21	15	6	4	1.10344	0.848185	0.353421
PotentialPeaks_FAIRE_peak_944	171	16	7	7	8	0.795238	0.3188	0.3188
PotentialPeaks_FAIRE_peak_945	153	11	4	13	9	0.526458	0.093499	0.629552
PotentialPeaks_FAIRE_peak_946	424	107	68	36	21	2.45678	1.90658	1.2147
PotentialPeaks_FAIRE_peak_947	225	24	15	11	14	0.980661	0.612929	0.41362
PotentialPeaks_FAIRE_peak_948	581	94	97	29	21	2.29562	2.33444	1.00611
PotentialPeaks_FAIRE_peak_949	153	7	10	6	2	0.469583	0.646461	0.405453
PotentialPeaks_FAIRE_peak_950	309	25	14	6	9	1.12912	0.678462	0.231003
PotentialPeaks_FAIRE_peak_951	422	118	87	54	22	2.56084	2.18125	1.62404
PotentialPeaks_FAIRE_peak_952	251	40	22	8	16	1.42331	0.863885	0.20092
PotentialPeaks_FAIRE_peak_953	367	56	37	16	23	1.64543	1.20343	0.475508
PotentialPeaks_FAIRE_peak_954	263	28	4	12	10	1.20772	0.0702143	0.555641
PotentialPeaks_FAIRE_peak_955	244	16	13	7	12	0.702815	0.560796	0.226377
PotentialPeaks_FAIRE_peak_956	214	21	12	6	6	1.05322	0.651124	0.3032
PotentialPeaks_FAIRE_peak_957	341	54	47	14	26	1.54855	1.39654	0.326153
PotentialPeaks_FAIRE_peak_958	197	19	10	18	20	0.663318	0.234474	0.621497
PotentialPeaks_FAIRE_peak_959	170	18	4	10	8	0.8827	0.117166	0.495677
PotentialPeaks_FAIRE_peak_960	506	58	34	23	23	1.68496	1.11936	0.76091
PotentialPeaks_FAIRE_peak_961	314	24	19	9	18	0.896343	0.703698	0.218271
PotentialPeaks_FAIRE_peak_962	273	26	9	12	12	1.09513	0.346671	0.51017
PotentialPeaks_FAIRE_peak_963	229	14	14	6	12	0.609705	0.609705	0.162246
PotentialPeaks_FAIRE_peak_964	324	22	29	6	17	0.842964	1.08689	0.0544685
PotentialPeaks_FAIRE_peak_965	160	12	8	3	7	0.626654	0.404262	0.0672266
PotentialPeaks_FAIRE_peak_966	198	18	9	9	9	0.859034	0.415427	0.415427
PotentialPeaks_FAIRE_peak_967	153	14	11	4	5	0.775551	0.623548	0.190588
PotentialPeaks_FAIRE_peak_968	179	15	7	8	1	0.926954	0.49632	0.557721
PotentialPeaks_FAIRE_peak_969	233	9	21	14	11	0.369228	0.934825	0.632262
PotentialPeaks_FAIRE_peak_970	220	26	9	4	15	1.0295	0.281043	-0.0408851
PotentialPeaks_FAIRE_peak_971	159	16	12	8	4	0.893989	0.701344	0.478952
PotentialPeaks_FAIRE_peak_972	278	30	14	6	10	1.27185	0.655177	0.207718
PotentialPeaks_FAIRE_peak_973	166	12	11	5	6	0.651124	0.598656	0.236086
PotentialPeaks_FAIRE_peak_974	251	26	18	7	11	1.11769	0.812834	0.248933
PotentialPeaks_FAIRE_peak_975	215	8	18	11	10	0.333249	0.835749	0.503174
PotentialPeaks_FAIRE_peak_976	770	197	117	72	39	2.93279	2.25336	1.65751
PotentialPeaks_FAIRE_peak_977	219	29	28	11	8	1.28709	1.25467	0.550125
PotentialPeaks_FAIRE_peak_978	383	49	39	19	15	1.65955	1.41855	0.76647
PotentialPeaks_FAIRE_peak_979	447	66	32	29	16	1.97351	1.20092	1.10781
PotentialPeaks_FAIRE_peak_980	367	35	25	12	17	1.26746	0.952589	0.402392
PotentialPeaks_FAIRE_peak_981	153	8	10	4	5	0.453623	0.5691	0.190588
PotentialPeaks_FAIRE_peak_982	279	13	11	15	8	0.653219	0.550125	0.749434
PotentialPeaks_FAIRE_peak_983	153	13	4	5	1	0.830739	0.294686	0.365076
PotentialPeaks_FAIRE_peak_984	232	46	25	13	10	1.70248	1.10584	0.606267
PotentialPeaks_FAIRE_peak_985	153	7	10	2	4	0.417551	0.594429	0.0639141
PotentialPeaks_FAIRE_peak_986	174	18	15	2	6	0.931231	0.797965	0.0136936
PotentialPeaks_FAIRE_peak_987	280	62	32	12	35	1.548	0.847559	0.0699518
PotentialPeaks_FAIRE_peak_988	189	5	16	5	21	-0.093422	0.514261	-0.093422
PotentialPeaks_FAIRE_peak_989	586	78	76	44	35	1.81719	1.78616	1.16949
PotentialPeaks_FAIRE_peak_990	343	55	49	35	34	1.42893	1.30156	0.951613
PotentialPeaks_FAIRE_peak_991	234	18	14	4	8	0.8827	0.702128	0.117166
PotentialPeaks_FAIRE_peak_992	199	13	12	16	26	0.277243	0.226617	0.419262
PotentialPeaks_FAIRE_peak_993	163	8	10	5	5	0.453623	0.5691	0.260978
PotentialPeaks_FAIRE_peak_994	297	26	18	11	20	0.926352	0.621497	0.288922
PotentialPeaks_FAIRE_peak_995	164	10	10	9	2	0.646461	0.646461	0.589877
PotentialPeaks_FAIRE_peak_996	373	46	36	16	13	1.6348	1.38105	0.680605
PotentialPeaks_FAIRE_peak_997	372	25	34	10	8	1.15279	1.43909	0.495677
PotentialPeaks_FAIRE_peak_998	155	12	14	4	11	0.532726	0.632262	0.0472994
PotentialPeaks_FAIRE_peak_999	273	15	10	14	14	0.612929	0.359172	0.565623
PotentialPeaks_FAIRE_peak_1000	191	13	11	7	21	0.372242	0.269148	0.0378226
PotentialPeaks_FAIRE_peak_1001	188	16	13	5	12	0.702815	0.560796	0.0951322
PotentialPeaks_FAIRE_peak_1002	162	18	5	10	14	0.746196	0.0510502	0.359172
PotentialPeaks_FAIRE_peak_1003	164	7	7	11	5	0.392222	0.392222	0.623548
PotentialPeaks_FAIRE_peak_1004	602	162	109	50	18	3.05015	2.5402	1.61881
PotentialPeaks_FAIRE_peak_1005	153	9	12	4	6	0.487625	0.651124	0.165697
PotentialPeaks_FAIRE_peak_1006	182	9	13	5	14	0.302589	0.516714	0.0510502
PotentialPeaks_FAIRE_peak_1007	960	181	132	81	67	2.43482	2.02222	1.41268
PotentialPeaks_FAIRE_peak_1008	504	183	139	48	32	2.94958	2.58908	1.31295
PotentialPeaks_FAIRE_peak_1009	165	19	16	7	11	0.854654	0.725371	0.248933
PotentialPeaks_FAIRE_peak_1010	664	101	123	55	30	2.21789	2.46647	1.49727
PotentialPeaks_FAIRE_peak_1011	169	13	7	4	9	0.629552	0.295133	0.093499
PotentialPeaks_FAIRE_peak_1012	726	124	117	50	33	2.42525	2.35125	1.34036
PotentialPeaks_FAIRE_peak_1013	204	17	15	8	12	0.747209	0.657011	0.287777
PotentialPeaks_FAIRE_peak_1014	240	20	19	13	16	0.785883	0.745241	0.473939
PotentialPeaks_FAIRE_peak_1015	665	76	77	25	29	1.88869	1.90429	0.72268
PotentialPeaks_FAIRE_peak_1016	187	17	14	13	11	0.769765	0.632262	0.583352
PotentialPeaks_FAIRE_peak_1017	248	7	12	10	12	0.226377	0.51017	0.403254
PotentialPeaks_FAIRE_peak_1018	153	15	4	5	9	0.725767	0.093499	0.163888
PotentialPeaks_FAIRE_peak_1019	519	130	72	31	25	2.62759	1.8972	0.992357
PotentialPeaks_FAIRE_peak_1020	329	21	30	9	18	0.783868	1.09798	0.218271
PotentialPeaks_FAIRE_peak_1021	236	40	15	29	17	1.40239	0.549233	1.08689
PotentialPeaks_FAIRE_peak_1022	336	27	19	11	13	1.10687	0.809888	0.435493
PotentialPeaks_FAIRE_peak_1023	181	9	9	11	6	0.487625	0.487625	0.598656
PotentialPeaks_FAIRE_peak_1024	166	13	7	6	6	0.70175	0.367331	0.3032
PotentialPeaks_FAIRE_peak_1025	231	16	26	17	31	0.330135	0.722453	0.374529
PotentialPeaks_FAIRE_peak_1026	263	43	35	18	23	1.35815	1.14793	0.56297
PotentialPeaks_FAIRE_peak_1027	153	8	4	10	14	0.243695	-0.0193391	0.359172
PotentialPeaks_FAIRE_peak_1028	173	12	7	10	17	0.402392	0.118599	0.295477
PotentialPeaks_FAIRE_peak_1029	232	20	13	15	16	0.785883	0.473939	0.570154
PotentialPeaks_FAIRE_peak_1030	159	9	10	7	10	0.392142	0.448726	0.271848
PotentialPeaks_FAIRE_peak_1031	497	66	76	21	25	1.79532	1.96133	0.647222
PotentialPeaks_FAIRE_peak_1032	154	12	10	6	6	0.651124	0.544208	0.3032
PotentialPeaks_FAIRE_peak_1033	326	103	50	29	21	2.40908	1.55865	1.00611
PotentialPeaks_FAIRE_peak_1034	254	16	15	7	8	0.795238	0.749434	0.3188
PotentialPeaks_FAIRE_peak_1035	248	18	11	4	13	0.768068	0.435493	0.00253348
PotentialPeaks_FAIRE_peak_1036	393	20	22	21	18	0.74434	0.822342	0.783868
PotentialPeaks_FAIRE_peak_1037	294	25	23	25	24	0.814066	0.741917	0.814066
PotentialPeaks_FAIRE_peak_1038	229	16	15	8	10	0.748286	0.702483	0.333249
PotentialPeaks_FAIRE_peak_1039	153	16	4	6	1	0.972758	0.294686	0.43219
PotentialPeaks_FAIRE_peak_1040	153	10	16	6	10	0.448726	0.748286	0.207718
PotentialPeaks_FAIRE_peak_1041	153	12	7	6	4	0.701344	0.417551	0.353421
PotentialPeaks_FAIRE_peak_1042	240	10	7	15	8	0.495677	0.3188	0.749434
PotentialPeaks_FAIRE_peak_1043	302	55	30	22	23	1.62525	0.999069	0.723435
PotentialPeaks_FAIRE_peak_1044	205	18	6	4	2	1.03348	0.405453	0.267949
PotentialPeaks_FAIRE_peak_1045	395	30	38	13	17	1.1186	1.34992	0.453018
PotentialPeaks_FAIRE_peak_1046	183	19	12	3	6	0.973052	0.651124	0.0916961
PotentialPeaks_FAIRE_peak_1047	545	56	43	18	25	1.60769	1.32041	0.525231
PotentialPeaks_FAIRE_peak_1048	217	8	19	5	12	0.287777	0.832098	0.0951322
PotentialPeaks_FAIRE_peak_1049	153	9	14	0	13	0.324462	0.587496	-0.319395
PotentialPeaks_FAIRE_peak_1050	283	16	12	14	20	0.534035	0.34139	0.440925
PotentialPeaks_FAIRE_peak_1051	165	10	12	4	5	0.5691	0.676015	0.190588
PotentialPeaks_FAIRE_peak_1052	197	8	16	11	13	0.265568	0.680605	0.435493
PotentialPeaks_FAIRE_peak_1053	250	15	19	11	23	0.429704	0.604791	0.230395
PotentialPeaks_FAIRE_peak_1054	299	27	16	16	17	1.0213	0.595037	0.595037
PotentialPeaks_FAIRE_peak_1055	483	32	33	32	22	1.07972	1.10946	1.07972
PotentialPeaks_FAIRE_peak_1056	209	11	8	9	4	0.648877	0.478952	0.537845
PotentialPeaks_FAIRE_peak_1057	350	37	37	13	7	1.54722	1.54722	0.67728
PotentialPeaks_FAIRE_peak_1058	424	72	47	11	33	1.7554	1.27325	0.0508583
PotentialPeaks_FAIRE_peak_1059	170	22	11	3	8	1.04317	0.550125	0.0431651
PotentialPeaks_FAIRE_peak_1060	173	13	7	7	6	0.70175	0.367331	0.367331
PotentialPeaks_FAIRE_peak_1061	153	7	4	4	13	0.204167	0.00253348	0.00253348
PotentialPeaks_FAIRE_peak_1062	155	9	11	5	5	0.512517	0.623548	0.260978
PotentialPeaks_FAIRE_peak_1063	247	42	25	16	14	1.51671	1.01628	0.658733
PotentialPeaks_FAIRE_peak_1064	166	9	7	3	11	0.369228	0.248933	-0.0267012
PotentialPeaks_FAIRE_peak_1065	176	14	4	2	5	0.775551	0.190588	0.0385853
PotentialPeaks_FAIRE_peak_1066	194	7	4	23	25	-0.0386698	-0.240304	0.72317
PotentialPeaks_FAIRE_peak_1067	230	8	16	11	16	0.20092	0.615958	0.370845
PotentialPeaks_FAIRE_peak_1068	157	13	6	4	13	0.538586	0.140037	0.00253348
PotentialPeaks_FAIRE_peak_1069	323	40	18	9	19	1.36144	0.641546	0.19794
PotentialPeaks_FAIRE_peak_1070	226	31	7	6	13	1.23519	0.204167	0.140037
PotentialPeaks_FAIRE_peak_1071	215	18	12	9	19	0.641546	0.361438	0.19794
PotentialPeaks_FAIRE_peak_1072	169	19	6	4	17	0.72432	0.0544685	-0.0830351
PotentialPeaks_FAIRE_peak_1073	234	13	13	6	8	0.653219	0.653219	0.254669
PotentialPeaks_FAIRE_peak_1074	188	10	8	9	6	0.544208	0.428731	0.487625
PotentialPeaks_FAIRE_peak_1075	157	9	7	3	7	0.463155	0.342861	0.0672266
PotentialPeaks_FAIRE_peak_1076	167	9	11	7	10	0.392142	0.503174	0.271848
PotentialPeaks_FAIRE_peak_1077	160	5	10	11	9	0.163888	0.472011	0.526458
PotentialPeaks_FAIRE_peak_1078	231	16	18	7	14	0.658733	0.746196	0.182295
PotentialPeaks_FAIRE_peak_1079	266	15	32	10	22	0.44895	1.07972	0.195194
PotentialPeaks_FAIRE_peak_1080	392	25	22	14	8	1.15279	1.04317	0.702128
PotentialPeaks_FAIRE_peak_1081	165	10	13	2	6	0.544208	0.70175	0.0136936
PotentialPeaks_FAIRE_peak_1082	202	24	3	5	3	1.2417	0.167698	0.312088
PotentialPeaks_FAIRE_peak_1083	210	20	8	5	11	0.895296	0.310334	0.117689
PotentialPeaks_FAIRE_peak_1084	160	7	6	12	8	0.3188	0.254669	0.602593
PotentialPeaks_FAIRE_peak_1085	294	13	14	8	10	0.606267	0.655177	0.333249
PotentialPeaks_FAIRE_peak_1086	153	9	5	5	8	0.439094	0.187555	0.187555
PotentialPeaks_FAIRE_peak_1087	153	10	10	4	6	0.544208	0.544208	0.165697
PotentialPeaks_FAIRE_peak_1088	290	29	15	5	14	1.15059	0.612929	0.0510502
PotentialPeaks_FAIRE_peak_1089	153	7	13	6	4	0.417551	0.75197	0.353421
PotentialPeaks_FAIRE_peak_1090	153	9	8	7	9	0.415427	0.356533	0.295133
PotentialPeaks_FAIRE_peak_1091	188	15	16	4	6	0.797965	0.843769	0.165697
PotentialPeaks_FAIRE_peak_1092	183	12	12	7	9	0.578926	0.578926	0.295133
PotentialPeaks_FAIRE_peak_1093	156	17	8	6	9	0.815965	0.356533	0.231003
PotentialPeaks_FAIRE_peak_1094	343	59	47	17	20	1.76285	1.51131	0.578429
PotentialPeaks_FAIRE_peak_1095	230	41	31	14	16	1.44885	1.17055	0.522849
PotentialPeaks_FAIRE_peak_1096	297	30	29	9	21	1.03782	1.00611	0.158117
PotentialPeaks_FAIRE_peak_1097	208	19	14	11	15	0.76647	0.544077	0.392074
PotentialPeaks_FAIRE_peak_1098	246	19	21	6	9	0.900854	0.981024	0.231003
PotentialPeaks_FAIRE_peak_1099	154	19	9	6	7	0.948582	0.463155	0.278731
PotentialPeaks_FAIRE_peak_1100	213	11	12	8	8	0.550125	0.602593	0.3802
PotentialPeaks_FAIRE_peak_1101	262	24	33	11	13	1.00253	1.29532	0.435493
PotentialPeaks_FAIRE_peak_1102	153	19	11	2	6	0.973052	0.598656	0.0136936
PotentialPeaks_FAIRE_peak_1103	179	20	8	9	20	0.70396	0.118997	0.177891
PotentialPeaks_FAIRE_peak_1104	365	44	17	20	25	1.34466	0.482162	0.607693
PotentialPeaks_FAIRE_peak_1105	153	10	15	3	12	0.403254	0.657011	-0.0492578
PotentialPeaks_FAIRE_peak_1106	636	91	46	25	27	2.14246	1.35519	0.758543
PotentialPeaks_FAIRE_peak_1107	237	15	7	10	5	0.822857	0.392222	0.5691
PotentialPeaks_FAIRE_peak_1108	205	15	18	7	10	0.702483	0.835749	0.271848
PotentialPeaks_FAIRE_peak_1109	228	36	10	8	15	1.33763	0.337627	0.222149
PotentialPeaks_FAIRE_peak_1110	250	37	26	15	14	1.38665	1.05105	0.612929
PotentialPeaks_FAIRE_peak_1111	186	21	5	10	14	0.868186	0.0510502	0.359172
PotentialPeaks_FAIRE_peak_1112	153	21	6	7	5	1.07811	0.328092	0.392222
PotentialPeaks_FAIRE_peak_1113	310	60	53	17	16	1.86389	1.72448	0.660352
PotentialPeaks_FAIRE_peak_1114	195	15	8	5	7	0.773495	0.404262	0.211616
PotentialPeaks_FAIRE_peak_1115	154	13	3	8	7	0.67728	0.0672266	0.404262
PotentialPeaks_FAIRE_peak_1116	595	139	93	74	30	2.62365	2.11571	1.83938
PotentialPeaks_FAIRE_peak_1117	282	95	56	31	22	2.28917	1.66468	1.04934
PotentialPeaks_FAIRE_peak_1118	451	70	43	19	24	1.88278	1.33916	0.585797
PotentialPeaks_FAIRE_peak_1119	166	12	11	6	6	0.651124	0.598656	0.3032
PotentialPeaks_FAIRE_peak_1120	201	13	10	11	13	0.538586	0.381045	0.435493
PotentialPeaks_FAIRE_peak_1121	245	18	16	7	9	0.859034	0.771571	0.295133
PotentialPeaks_FAIRE_peak_1122	483	83	51	24	16	2.24531	1.68205	0.937886
PotentialPeaks_FAIRE_peak_1123	274	23	18	3	18	0.859817	0.661878	-0.177658
PotentialPeaks_FAIRE_peak_1124	401	54	33	8	14	1.78802	1.27344	0.243695
PotentialPeaks_FAIRE_peak_1125	474	59	22	15	33	1.52479	0.543898	0.250167
PotentialPeaks_FAIRE_peak_1126	295	33	32	19	15	1.2519	1.22215	0.76647
PotentialPeaks_FAIRE_peak_1127	159	6	12	9	12	0.162246	0.51017	0.346671
PotentialPeaks_FAIRE_peak_1128	184	19	7	5	10	0.877569	0.271848	0.140604
PotentialPeaks_FAIRE_peak_1129	347	21	15	17	31	0.539588	0.284331	0.374529
PotentialPeaks_FAIRE_peak_1130	163	10	14	9	8	0.495677	0.702128	0.439094
PotentialPeaks_FAIRE_peak_1131	160	13	12	2	8	0.653219	0.602593	-0.0348374
PotentialPeaks_FAIRE_peak_1132	335	29	17	13	16	1.10781	0.660352	0.473939
PotentialPeaks_FAIRE_peak_1133	331	31	31	5	15	1.19178	1.19178	0.0295042
PotentialPeaks_FAIRE_peak_1134	199	16	17	2	9	0.771571	0.815965	-0.0585041
PotentialPeaks_FAIRE_peak_1135	184	11	13	5	10	0.503174	0.606267	0.140604
PotentialPeaks_FAIRE_peak_1136	295	19	29	26	19	0.683366	1.04594	0.946401
PotentialPeaks_FAIRE_peak_1137	248	21	10	19	25	0.647222	0.138208	0.567051
PotentialPeaks_FAIRE_peak_1138	153	9	8	7	13	0.324462	0.265568	0.204167
PotentialPeaks_FAIRE_peak_1139	661	89	55	57	46	1.80593	1.24143	1.28151
PotentialPeaks_FAIRE_peak_1140	492	70	57	20	34	1.70545	1.46901	0.449112
PotentialPeaks_FAIRE_peak_1141	424	39	32	20	39	0.979439	0.783042	0.368004
PotentialPeaks_FAIRE_peak_1142	215	16	9	9	15	0.637187	0.281043	0.281043
PotentialPeaks_FAIRE_peak_1143	313	25	22	14	11	1.08292	0.973299	0.632262
PotentialPeaks_FAIRE_peak_1144	445	58	23	17	22	1.70421	0.780156	0.539148
PotentialPeaks_FAIRE_peak_1145	199	7	10	9	8	0.3188	0.495677	0.439094
PotentialPeaks_FAIRE_peak_1146	174	20	10	9	6	1.01369	0.544208	0.487625
PotentialPeaks_FAIRE_peak_1147	248	17	13	10	7	0.863693	0.67728	0.519739
PotentialPeaks_FAIRE_peak_1148	331	17	21	17	15	0.681581	0.84664	0.681581
PotentialPeaks_FAIRE_peak_1149	383	23	29	15	21	0.799663	1.00611	0.468457
PotentialPeaks_FAIRE_peak_1150	257	20	15	4	11	0.895296	0.679568	0.0472994
PotentialPeaks_FAIRE_peak_1151	395	77	58	23	22	2.03391	1.70421	0.780156
PotentialPeaks_FAIRE_peak_1152	254	22	19	9	10	0.996214	0.877569	0.392142
PotentialPeaks_FAIRE_peak_1153	153	15	22	8	8	0.749434	1.04317	0.3802
PotentialPeaks_FAIRE_peak_1154	387	123	125	52	10	2.86723	2.88784	1.83575
PotentialPeaks_FAIRE_peak_1155	325	54	43	33	15	1.76647	1.51983	1.2519
PotentialPeaks_FAIRE_peak_1156	259	15	17	9	14	0.612929	0.703127	0.302589
PotentialPeaks_FAIRE_peak_1157	211	12	19	4	8	0.602593	0.924521	0.117166
PotentialPeaks_FAIRE_peak_1158	210	20	7	15	8	0.965163	0.3188	0.749434
PotentialPeaks_FAIRE_peak_1159	227	24	14	12	10	1.07021	0.655177	0.555641
PotentialPeaks_FAIRE_peak_1160	181	17	10	12	4	0.938383	0.594429	0.701344
PotentialPeaks_FAIRE_peak_1161	334	29	16	8	12	1.19467	0.702815	0.287777
PotentialPeaks_FAIRE_peak_1162	153	8	10	9	6	0.428731	0.544208	0.487625
PotentialPeaks_FAIRE_peak_1163	448	63	28	29	27	1.70477	0.860423	0.892844
PotentialPeaks_FAIRE_peak_1164	155	11	11	5	6	0.598656	0.598656	0.236086
PotentialPeaks_FAIRE_peak_1165	209	17	18	5	6	0.888163	0.931231	0.236086
PotentialPeaks_FAIRE_peak_1166	247	14	11	8	7	0.72619	0.574187	0.404262
PotentialPeaks_FAIRE_peak_1167	170	12	11	5	14	0.466088	0.41362	0.0510502
PotentialPeaks_FAIRE_peak_1168	279	24	12	11	16	0.937886	0.423313	0.370845
PotentialPeaks_FAIRE_peak_1169	525	100	53	11	12	2.5608	1.81134	0.457702
PotentialPeaks_FAIRE_peak_1170	543	49	45	24	27	1.42336	1.33173	0.722919
PotentialPeaks_FAIRE_peak_1171	517	118	88	43	36	2.31228	1.94663	1.12884
PotentialPeaks_FAIRE_peak_1172	172	16	13	19	14	0.658733	0.516714	0.788016
PotentialPeaks_FAIRE_peak_1173	551	150	113	61	26	2.7943	2.43049	1.68605
PotentialPeaks_FAIRE_peak_1174	265	21	22	9	9	0.981024	1.0195	0.415427
PotentialPeaks_FAIRE_peak_1175	286	64	55	34	10	2.07021	1.89803	1.39214
PotentialPeaks_FAIRE_peak_1176	236	33	33	10	9	1.38628	1.38628	0.472011
PotentialPeaks_FAIRE_peak_1177	183	10	14	9	9	0.472011	0.678462	0.415427
PotentialPeaks_FAIRE_peak_1178	738	158	143	51	43	2.57927	2.44921	1.20241
PotentialPeaks_FAIRE_peak_1179	321	23	16	21	26	0.704665	0.419262	0.628716
PotentialPeaks_FAIRE_peak_1180	272	30	27	21	24	0.980076	0.882779	0.665968
PotentialPeaks_FAIRE_peak_1181	328	31	34	16	14	1.21332	1.30259	0.658733
PotentialPeaks_FAIRE_peak_1182	576	114	68	22	15	2.65955	2.0295	0.885114
PotentialPeaks_FAIRE_peak_1183	237	20	5	10	10	0.918211	0.140604	0.448726
PotentialPeaks_FAIRE_peak_1184	178	17	4	3	3	0.964165	0.241699	0.167698
PotentialPeaks_FAIRE_peak_1185	153	13	5	9	7	0.67728	0.211616	0.463155
PotentialPeaks_FAIRE_peak_1186	263	35	29	17	14	1.33116	1.15059	0.703127
PotentialPeaks_FAIRE_peak_1187	153	9	9	9	13	0.324462	0.324462	0.324462
PotentialPeaks_FAIRE_peak_1188	429	20	28	14	27	0.570916	0.860423	0.307882
PotentialPeaks_FAIRE_peak_1189	161	13	4	10	14	0.516714	-0.0193391	0.359172
PotentialPeaks_FAIRE_peak_1190	198	16	8	8	8	0.795238	0.3802	0.3802
PotentialPeaks_FAIRE_peak_1191	188	7	14	3	7	0.342861	0.72619	0.0672266
PotentialPeaks_FAIRE_peak_1192	156	16	7	4	6	0.843769	0.367331	0.165697
PotentialPeaks_FAIRE_peak_1193	194	6	6	12	13	0.140037	0.140037	0.48796
PotentialPeaks_FAIRE_peak_1194	250	12	10	12	14	0.466088	0.359172	0.466088
PotentialPeaks_FAIRE_peak_1195	637	103	60	23	33	2.19079	1.5439	0.581373
PotentialPeaks_FAIRE_peak_1196	574	52	32	27	22	1.58222	1.07972	0.921019
PotentialPeaks_FAIRE_peak_1197	344	33	46	11	13	1.29532	1.6348	0.435493
PotentialPeaks_FAIRE_peak_1198	289	28	18	7	10	1.20772	0.835749	0.271848
PotentialPeaks_FAIRE_peak_1199	264	41	18	18	20	1.36692	0.621497	0.621497
PotentialPeaks_FAIRE_peak_1200	160	12	9	6	9	0.578926	0.415427	0.231003
PotentialPeaks_FAIRE_peak_1201	212	28	15	15	14	1.11816	0.612929	0.612929
PotentialPeaks_FAIRE_peak_1202	154	13	4	7	11	0.583352	0.0472994	0.248933
PotentialPeaks_FAIRE_peak_1203	325	83	44	27	9	2.40093	1.67846	1.19784
PotentialPeaks_FAIRE_peak_1204	632	156	131	63	22	2.92102	2.69443	1.79853
PotentialPeaks_FAIRE_peak_1205	672	137	104	66	38	2.47133	2.12083	1.57149
PotentialPeaks_FAIRE_peak_1206	222	19	13	12	21	0.643544	0.372242	0.321616
PotentialPeaks_FAIRE_peak_1207	260	25	20	4	8	1.15279	0.965163	0.117166
PotentialPeaks_FAIRE_peak_1208	303	10	37	6	11	0.425811	1.45329	0.184803
PotentialPeaks_FAIRE_peak_1209	156	11	6	5	14	0.41362	0.118164	0.0510502
PotentialPeaks_FAIRE_peak_1210	166	14	5	5	5	0.775551	0.260978	0.260978
PotentialPeaks_FAIRE_peak_1211	202	14	13	13	14	0.565623	0.516714	0.516714
PotentialPeaks_FAIRE_peak_1212	377	20	48	10	5	1.03859	1.86866	0.5691
PotentialPeaks_FAIRE_peak_1213	366	27	23	11	13	1.10687	0.966008	0.435493
PotentialPeaks_FAIRE_peak_1214	224	9	15	14	10	0.392142	0.702483	0.655177
PotentialPeaks_FAIRE_peak_1215	169	17	8	3	7	0.863693	0.404262	0.0672266
PotentialPeaks_FAIRE_peak_1216	202	12	15	4	5	0.676015	0.822857	0.190588
PotentialPeaks_FAIRE_peak_1217	173	11	9	8	17	0.349924	0.238893	0.179999
PotentialPeaks_FAIRE_peak_1218	491	60	54	16	29	1.61306	1.49441	0.365128
PotentialPeaks_FAIRE_peak_1219	210	14	13	1	9	0.678462	0.629552	-0.140966
PotentialPeaks_FAIRE_peak_1220	257	25	31	17	19	0.911635	1.10867	0.598478
PotentialPeaks_FAIRE_peak_1221	328	26	17	8	18	0.966732	0.618809	0.159377
PotentialPeaks_FAIRE_peak_1222	247	13	12	3	9	0.629552	0.578926	0.0194984
PotentialPeaks_FAIRE_peak_1223	154	13	13	2	1	0.830739	0.830739	0.142683
PotentialPeaks_FAIRE_peak_1224	160	8	13	2	6	0.428731	0.70175	0.0136936
PotentialPeaks_FAIRE_peak_1225	181	9	6	10	11	0.369228	0.184803	0.425811
PotentialPeaks_FAIRE_peak_1226	412	35	38	13	25	1.11019	1.19266	0.295749
PotentialPeaks_FAIRE_peak_1227	202	14	5	4	12	0.609705	0.0951322	0.0247428
PotentialPeaks_FAIRE_peak_1228	504	80	67	24	16	2.20092	1.991	0.937886
PotentialPeaks_FAIRE_peak_1229	323	54	40	24	4	2.02327	1.70134	1.21592
PotentialPeaks_FAIRE_peak_1230	358	57	47	21	7	2.00912	1.79658	1.02875
PotentialPeaks_FAIRE_peak_1231	222	19	15	25	29	0.494411	0.319324	0.72268
PotentialPeaks_FAIRE_peak_1232	153	14	5	7	2	0.852912	0.338338	0.469583
PotentialPeaks_FAIRE_peak_1233	168	11	7	2	1	0.727646	0.49632	0.142683
PotentialPeaks_FAIRE_peak_1234	261	18	15	12	23	0.56297	0.429704	0.282862
PotentialPeaks_FAIRE_peak_1235	247	9	10	13	14	0.302589	0.359172	0.516714
PotentialPeaks_FAIRE_peak_1236	183	18	12	11	7	0.906762	0.626654	0.574187
PotentialPeaks_FAIRE_peak_1237	179	13	10	5	8	0.653219	0.495677	0.187555
PotentialPeaks_FAIRE_peak_1238	325	64	41	27	9	2.0935	1.60446	1.19784
PotentialPeaks_FAIRE_peak_1239	289	23	22	31	19	0.839486	0.802011	1.10867
PotentialPeaks_FAIRE_peak_1240	274	17	11	15	6	0.888163	0.598656	0.797965
PotentialPeaks_FAIRE_peak_1241	206	18	15	13	9	0.859034	0.725767	0.629552
PotentialPeaks_FAIRE_peak_1242	160	10	12	5	7	0.519739	0.626654	0.211616
PotentialPeaks_FAIRE_peak_1243	492	69	62	30	33	1.70536	1.58137	0.819533
PotentialPeaks_FAIRE_peak_1244	153	13	6	5	8	0.653219	0.254669	0.187555
PotentialPeaks_FAIRE_peak_1245	263	18	18	10	7	0.906762	0.906762	0.519739
PotentialPeaks_FAIRE_peak_1246	353	48	31	8	19	1.55408	1.10867	0.139046
PotentialPeaks_FAIRE_peak_1247	196	10	13	8	10	0.448726	0.606267	0.333249
PotentialPeaks_FAIRE_peak_1248	441	34	39	29	13	1.32446	1.46197	1.17246
PotentialPeaks_FAIRE_peak_1249	244	18	14	10	12	0.790278	0.609705	0.403254
PotentialPeaks_FAIRE_peak_1250	227	14	17	7	11	0.632262	0.769765	0.248933
PotentialPeaks_FAIRE_peak_1251	178	8	7	7	6	0.428731	0.367331	0.367331
PotentialPeaks_FAIRE_peak_1252	376	54	37	21	9	1.90085	1.49949	0.981024
PotentialPeaks_FAIRE_peak_1253	155	20	9	7	8	0.965163	0.439094	0.3188
PotentialPeaks_FAIRE_peak_1254	335	29	34	13	16	1.10781	1.25981	0.473939
PotentialPeaks_FAIRE_peak_1255	487	58	44	17	21	1.72371	1.42115	0.558655
PotentialPeaks_FAIRE_peak_1256	188	17	14	6	8	0.839632	0.702128	0.254669
PotentialPeaks_FAIRE_peak_1257	153	2	5	8	10	-0.0817888	0.140604	0.333249
PotentialPeaks_FAIRE_peak_1258	225	30	17	16	20	1.0576	0.578429	0.534035
PotentialPeaks_FAIRE_peak_1259	214	11	7	19	10	0.503174	0.271848	0.877569
PotentialPeaks_FAIRE_peak_1260	275	28	34	18	24	0.915946	1.10037	0.543977
PotentialPeaks_FAIRE_peak_1261	338	48	32	9	25	1.43777	1.02273	0.0816244
PotentialPeaks_FAIRE_peak_1262	263	19	24	13	7	0.948582	1.14123	0.67728
PotentialPeaks_FAIRE_peak_1263	196	25	24	9	6	1.20132	1.1657	0.487625
PotentialPeaks_FAIRE_peak_1264	287	39	33	5	2	1.72738	1.56073	0.338338
PotentialPeaks_FAIRE_peak_1265	217	18	18	4	19	0.641546	0.641546	-0.123988
PotentialPeaks_FAIRE_peak_1266	222	30	9	8	8	1.3188	0.439094	0.3802
PotentialPeaks_FAIRE_peak_1267	311	31	28	40	28	0.937537	0.84238	1.1903
PotentialPeaks_FAIRE_peak_1268	236	12	16	9	20	0.34139	0.534035	0.177891
PotentialPeaks_FAIRE_peak_1269	282	35	13	10	13	1.35303	0.538586	0.381045
PotentialPeaks_FAIRE_peak_1270	250	17	10	5	12	0.747209	0.403254	0.0951322
PotentialPeaks_FAIRE_peak_1271	179	19	4	7	18	0.703698	-0.103657	0.0979768
PotentialPeaks_FAIRE_peak_1272	177	19	11	4	5	0.997943	0.623548	0.190588
PotentialPeaks_FAIRE_peak_1273	164	15	6	7	12	0.657011	0.162246	0.226377
PotentialPeaks_FAIRE_peak_1274	220	8	14	19	9	0.356533	0.678462	0.900854
PotentialPeaks_FAIRE_peak_1275	180	8	8	8	10	0.333249	0.333249	0.333249
PotentialPeaks_FAIRE_peak_1276	189	9	10	10	4	0.537845	0.594429	0.594429
PotentialPeaks_FAIRE_peak_1277	233	17	15	12	20	0.578429	0.488231	0.34139
PotentialPeaks_FAIRE_peak_1278	210	37	17	5	8	1.52316	0.839632	0.187555
PotentialPeaks_FAIRE_peak_1279	475	123	75	36	15	2.75613	2.14498	1.33763
PotentialPeaks_FAIRE_peak_1280	154	7	5	9	18	0.0979768	-0.0332677	0.218271
PotentialPeaks_FAIRE_peak_1281	188	14	13	2	3	0.826661	0.777752	0.0896955
PotentialPeaks_FAIRE_peak_1282	190	21	11	7	13	0.890059	0.435493	0.204167
PotentialPeaks_FAIRE_peak_1283	153	12	3	7	8	0.602593	0.0431651	0.3188
PotentialPeaks_FAIRE_peak_1284	204	27	23	5	6	1.27003	1.12917	0.236086
PotentialPeaks_FAIRE_peak_1285	525	78	44	26	19	2.10867	1.46097	0.946401
PotentialPeaks_FAIRE_peak_1286	160	18	12	2	6	0.931231	0.651124	0.0136936
PotentialPeaks_FAIRE_peak_1287	649	75	59	30	27	1.90879	1.62981	0.924553
PotentialPeaks_FAIRE_peak_1288	279	29	21	15	10	1.24014	0.95774	0.702483
PotentialPeaks_FAIRE_peak_1289	306	58	48	13	4	2.10344	1.89399	0.75197
PotentialPeaks_FAIRE_peak_1290	212	9	17	12	3	0.563627	0.964165	0.727125
PotentialPeaks_FAIRE_peak_1291	184	16	11	5	9	0.771571	0.526458	0.163888
PotentialPeaks_FAIRE_peak_1292	153	6	11	5	6	0.3032	0.598656	0.236086
PotentialPeaks_FAIRE_peak_1293	248	19	9	4	5	0.997943	0.512517	0.190588
PotentialPeaks_FAIRE_peak_1294	153	8	4	6	12	0.287777	0.0247428	0.162246
PotentialPeaks_FAIRE_peak_1295	153	10	12	3	11	0.425811	0.532726	-0.0267012
PotentialPeaks_FAIRE_peak_1296	153	12	8	6	1	0.780113	0.557721	0.43219
PotentialPeaks_FAIRE_peak_1297	218	13	6	6	6	0.70175	0.3032	0.3032
PotentialPeaks_FAIRE_peak_1298	248	36	20	12	17	1.29548	0.764962	0.402392
PotentialPeaks_FAIRE_peak_1299	367	41	30	31	26	1.25215	0.942824	0.973851
PotentialPeaks_FAIRE_peak_1300	153	19	8	2	4	1.02327	0.478952	0.0639141
PotentialPeaks_FAIRE_peak_1301	230	25	25	10	7	1.17685	1.17685	0.519739
PotentialPeaks_FAIRE_peak_1302	206	28	17	10	5	1.32809	0.913054	0.5691
PotentialPeaks_FAIRE_peak_1303	199	23	12	12	22	0.780156	0.302109	0.302109
PotentialPeaks_FAIRE_peak_1304	387	74	45	15	16	2.10781	1.5467	0.570154
PotentialPeaks_FAIRE_peak_1305	444	68	50	14	22	1.88707	1.53915	0.401645
PotentialPeaks_FAIRE_peak_1306	265	20	31	12	22	0.664679	1.04934	0.302109
PotentialPeaks_FAIRE_peak_1307	303	63	45	15	5	2.17244	1.7994	0.822857
PotentialPeaks_FAIRE_peak_1308	296	33	26	13	19	1.16879	0.946401	0.412064
PotentialPeaks_FAIRE_peak_1309	153	12	9	2	6	0.651124	0.487625	0.0136936
PotentialPeaks_FAIRE_peak_1310	319	68	51	27	10	2.1406	1.81438	1.17455
PotentialPeaks_FAIRE_peak_1311	266	27	17	12	6	1.27003	0.888163	0.651124
PotentialPeaks_FAIRE_peak_1312	510	108	71	41	45	2.06061	1.54935	0.9393
PotentialPeaks_FAIRE_peak_1313	200	15	8	10	14	0.612929	0.243695	0.359172
PotentialPeaks_FAIRE_peak_1314	263	8	19	9	17	0.179999	0.72432	0.238893
PotentialPeaks_FAIRE_peak_1315	169	14	10	4	7	0.72619	0.519739	0.141227
PotentialPeaks_FAIRE_peak_1316	207	12	19	7	6	0.651124	0.973052	0.367331
PotentialPeaks_FAIRE_peak_1317	387	36	34	13	17	1.29548	1.23889	0.453018
PotentialPeaks_FAIRE_peak_1318	579	59	43	12	33	1.52479	1.17861	0.103326
PotentialPeaks_FAIRE_peak_1319	318	42	24	6	23	1.33349	0.797436	-0.0650609
PotentialPeaks_FAIRE_peak_1320	175	7	19	3	7	0.342861	0.948582	0.0672266
PotentialPeaks_FAIRE_peak_1321	343	29	21	14	8	1.28709	1.00469	0.702128
PotentialPeaks_FAIRE_peak_1322	170	10	10	5	4	0.594429	0.594429	0.286307
PotentialPeaks_FAIRE_peak_1323	357	57	29	10	10	1.93811	1.24014	0.448726
PotentialPeaks_FAIRE_peak_1324	189	17	15	14	9	0.815965	0.725767	0.678462
PotentialPeaks_FAIRE_peak_1325	823	174	145	103	57	2.50874	2.26981	1.83371
PotentialPeaks_FAIRE_peak_1326	199	14	14	0	7	0.72619	0.72619	-0.180701
PotentialPeaks_FAIRE_peak_1327	172	9	7	5	6	0.487625	0.367331	0.236086
PotentialPeaks_FAIRE_peak_1328	158	6	7	9	5	0.328092	0.392222	0.512517
PotentialPeaks_FAIRE_peak_1329	243	62	37	21	14	1.94413	1.38665	0.868186
PotentialPeaks_FAIRE_peak_1330	205	23	23	10	12	0.988217	0.988217	0.403254
PotentialPeaks_FAIRE_peak_1331	201	32	19	7	14	1.2437	0.788016	0.182295
PotentialPeaks_FAIRE_peak_1332	220	13	18	14	22	0.352735	0.582217	0.401645
PotentialPeaks_FAIRE_peak_1333	184	18	5	10	5	0.956123	0.260978	0.5691
PotentialPeaks_FAIRE_peak_1334	153	6	8	5	7	0.278731	0.404262	0.211616
PotentialPeaks_FAIRE_peak_1335	878	148	64	24	31	2.68769	1.65206	0.652063
PotentialPeaks_FAIRE_peak_1336	275	24	20	6	12	1.02474	0.87274	0.162246
PotentialPeaks_FAIRE_peak_1337	153	13	11	1	4	0.75197	0.648877	-0.0185481
PotentialPeaks_FAIRE_peak_1338	329	54	24	28	30	1.47681	0.669454	0.806957
PotentialPeaks_FAIRE_peak_1339	342	49	33	17	24	1.47888	1.07122	0.500909
PotentialPeaks_FAIRE_peak_1340	178	28	17	5	11	1.1848	0.769765	0.117689
PotentialPeaks_FAIRE_peak_1341	199	21	19	10	10	0.95774	0.877569	0.448726
PotentialPeaks_FAIRE_peak_1342	169	14	11	13	7	0.72619	0.574187	0.67728
PotentialPeaks_FAIRE_peak_1343	182	16	11	15	17	0.595037	0.349924	0.549233
PotentialPeaks_FAIRE_peak_1344	153	14	10	6	12	0.609705	0.403254	0.162246
PotentialPeaks_FAIRE_peak_1345	153	6	9	13	5	0.328092	0.512517	0.726641
PotentialPeaks_FAIRE_peak_1346	154	7	7	12	9	0.295133	0.295133	0.578926
PotentialPeaks_FAIRE_peak_1347	214	15	12	5	6	0.797965	0.651124	0.236086
PotentialPeaks_FAIRE_peak_1348	153	5	8	12	5	0.260978	0.453623	0.676015
PotentialPeaks_FAIRE_peak_1349	155	20	9	1	12	0.87274	0.346671	-0.209722
PotentialPeaks_FAIRE_peak_1350	208	12	7	3	3	0.727125	0.443332	0.167698
PotentialPeaks_FAIRE_peak_1351	153	14	6	7	8	0.702128	0.254669	0.3188
PotentialPeaks_FAIRE_peak_1352	253	30	10	8	11	1.24893	0.425811	0.310334
PotentialPeaks_FAIRE_peak_1353	184	18	7	3	13	0.768068	0.204167	-0.0714671
PotentialPeaks_FAIRE_peak_1354	153	7	6	8	6	0.367331	0.3032	0.428731
PotentialPeaks_FAIRE_peak_1355	153	12	10	1	13	0.48796	0.381045	-0.231932
PotentialPeaks_FAIRE_peak_1356	266	16	14	8	8	0.795238	0.702128	0.3802
PotentialPeaks_FAIRE_peak_1357	331	25	19	14	18	0.931967	0.703698	0.481305
PotentialPeaks_FAIRE_peak_1358	240	11	16	3	7	0.574187	0.819299	0.0672266
PotentialPeaks_FAIRE_peak_1359	156	17	4	8	9	0.815965	0.093499	0.356533
PotentialPeaks_FAIRE_peak_1360	502	47	24	24	22	1.47203	0.816682	0.816682
PotentialPeaks_FAIRE_peak_1361	153	12	9	3	10	0.555641	0.392142	-0.00378629
PotentialPeaks_FAIRE_peak_1362	205	6	8	14	8	0.254669	0.3802	0.702128
PotentialPeaks_FAIRE_peak_1363	157	8	12	9	4	0.478952	0.701344	0.537845
PotentialPeaks_FAIRE_peak_1364	505	43	61	28	17	1.47768	1.86182	1.05447
PotentialPeaks_FAIRE_peak_1365	158	3	12	7	6	0.0916961	0.651124	0.367331
PotentialPeaks_FAIRE_peak_1366	235	8	13	14	14	0.243695	0.516714	0.565623
PotentialPeaks_FAIRE_peak_1367	342	15	17	30	18	0.528611	0.618809	1.09798
PotentialPeaks_FAIRE_peak_1368	204	11	7	10	6	0.598656	0.367331	0.544208
PotentialPeaks_FAIRE_peak_1369	181	8	9	6	8	0.3802	0.439094	0.254669
PotentialPeaks_FAIRE_peak_1370	350	26	17	17	16	1.00828	0.660352	0.660352
PotentialPeaks_FAIRE_peak_1371	244	25	11	10	14	1.01628	0.41362	0.359172
PotentialPeaks_FAIRE_peak_1372	493	55	44	13	21	1.66401	1.42115	0.372242
PotentialPeaks_FAIRE_peak_1373	163	11	5	6	3	0.674658	0.312088	0.379202
PotentialPeaks_FAIRE_peak_1374	672	95	46	24	25	2.23218	1.39196	0.759696
PotentialPeaks_FAIRE_peak_1375	249	35	30	14	23	1.14793	0.999069	0.382398
PotentialPeaks_FAIRE_peak_1376	268	15	7	14	7	0.773495	0.342861	0.72619
PotentialPeaks_FAIRE_peak_1377	419	18	38	27	19	0.641546	1.30897	0.980348
PotentialPeaks_FAIRE_peak_1378	166	7	13	2	9	0.295133	0.629552	-0.0585041
PotentialPeaks_FAIRE_peak_1379	171	20	6	3	6	1.01369	0.3032	0.0916961
PotentialPeaks_FAIRE_peak_1380	233	19	26	16	14	0.788016	1.05105	0.658733
PotentialPeaks_FAIRE_peak_1381	314	43	33	31	18	1.45706	1.18912	1.129
PotentialPeaks_FAIRE_peak_1382	175	14	12	6	5	0.775551	0.676015	0.328092
PotentialPeaks_FAIRE_peak_1383	271	30	22	12	7	1.34286	1.06723	0.626654
PotentialPeaks_FAIRE_peak_1384	190	17	10	16	16	0.660352	0.316398	0.615958
PotentialPeaks_FAIRE_peak_1385	197	18	9	8	7	0.906762	0.463155	0.404262
PotentialPeaks_FAIRE_peak_1386	238	28	25	7	9	1.231	1.12912	0.295133
PotentialPeaks_FAIRE_peak_1387	171	17	9	4	4	0.938383	0.537845	0.215917
PotentialPeaks_FAIRE_peak_1388	716	53	72	29	18	1.68294	2.03385	1.06627
PotentialPeaks_FAIRE_peak_1389	478	60	53	25	16	1.86389	1.72448	0.97351
PotentialPeaks_FAIRE_peak_1390	205	11	10	11	3	0.674658	0.62021	0.674658
PotentialPeaks_FAIRE_peak_1391	251	47	27	22	6	1.82105	1.27003	1.0917
PotentialPeaks_FAIRE_peak_1392	153	10	12	4	8	0.495677	0.602593	0.117166
PotentialPeaks_FAIRE_peak_1393	178	24	6	10	12	1.02474	0.162246	0.403254
PotentialPeaks_FAIRE_peak_1394	373	65	89	34	21	1.85411	2.22851	1.15812
PotentialPeaks_FAIRE_peak_1395	555	227	131	85	24	3.38133	2.65619	2.11473
PotentialPeaks_FAIRE_peak_1396	157	10	8	12	7	0.519739	0.404262	0.626654
PotentialPeaks_FAIRE_peak_1397	177	19	14	10	9	0.900854	0.678462	0.472011
PotentialPeaks_FAIRE_peak_1398	469	148	99	41	24	2.81407	2.302	1.2894
PotentialPeaks_FAIRE_peak_1399	200	11	14	16	9	0.526458	0.678462	0.771571
PotentialPeaks_FAIRE_peak_1400	377	36	49	25	28	1.08339	1.40532	0.7405
PotentialPeaks_FAIRE_peak_1401	191	10	14	6	14	0.359172	0.565623	0.118164
PotentialPeaks_FAIRE_peak_1402	204	22	18	6	11	0.973299	0.812834	0.184803
PotentialPeaks_FAIRE_peak_1403	477	98	70	30	16	2.44885	2.04222	1.13952
PotentialPeaks_FAIRE_peak_1404	433	116	76	39	26	2.46366	1.94282	1.20062
PotentialPeaks_FAIRE_peak_1405	220	19	31	13	18	0.703698	1.129	0.432396
PotentialPeaks_FAIRE_peak_1406	198	15	21	12	11	0.679568	0.934825	0.532726
PotentialPeaks_FAIRE_peak_1407	380	52	37	11	33	1.38343	1.02389	0.0508583
PotentialPeaks_FAIRE_peak_1408	357	98	65	16	14	2.49162	1.99858	0.658733
PotentialPeaks_FAIRE_peak_1409	979	207	184	82	39	2.99898	2.84194	1.81279
PotentialPeaks_FAIRE_peak_1410	323	46	40	11	6	1.79796	1.65112	0.598656
PotentialPeaks_FAIRE_peak_1411	779	218	167	68	37	3.10034	2.74568	1.62229
PotentialPeaks_FAIRE_peak_1412	153	10	8	7	6	0.544208	0.428731	0.367331
PotentialPeaks_FAIRE_peak_1413	356	70	65	36	32	1.73922	1.6528	1.01339
PotentialPeaks_FAIRE_peak_1414	183	7	16	9	5	0.392222	0.86866	0.512517
PotentialPeaks_FAIRE_peak_1415	162	4	10	7	15	-0.0408851	0.337627	0.160749
PotentialPeaks_FAIRE_peak_1416	495	74	74	56	7	2.31115	2.31115	1.98922
PotentialPeaks_FAIRE_peak_1417	189	10	15	4	7	0.519739	0.773495	0.141227
PotentialPeaks_FAIRE_peak_1418	217	20	18	7	11	0.895296	0.812834	0.248933
PotentialPeaks_FAIRE_peak_1419	196	42	14	8	16	1.47394	0.522849	0.20092
PotentialPeaks_FAIRE_peak_1420	373	104	58	25	17	2.50193	1.80449	0.952589
PotentialPeaks_FAIRE_peak_1421	171	13	14	3	8	0.653219	0.702128	0.0431651
PotentialPeaks_FAIRE_peak_1422	153	18	10	4	4	0.981452	0.594429	0.215917
PotentialPeaks_FAIRE_peak_1423	256	35	39	11	18	1.24684	1.35577	0.329302
PotentialPeaks_FAIRE_peak_1424	323	23	26	12	10	1.03369	1.1406	0.555641
PotentialPeaks_FAIRE_peak_1425	193	20	21	12	10	0.918211	0.95774	0.555641
PotentialPeaks_FAIRE_peak_1426	293	66	52	20	17	1.95259	1.6825	0.764962
PotentialPeaks_FAIRE_peak_1427	401	56	40	23	17	1.76496	1.40239	0.880439
PotentialPeaks_FAIRE_peak_1428	761	183	92	27	55	2.60212	1.72038	0.391758
PotentialPeaks_FAIRE_peak_1429	294	45	32	14	12	1.63355	1.28778	0.609705
PotentialPeaks_FAIRE_peak_1430	309	77	57	35	8	2.3344	1.98506	1.46766
PotentialPeaks_FAIRE_peak_1431	350	61	42	40	13	1.94739	1.53859	1.48796
PotentialPeaks_FAIRE_peak_1432	267	32	39	20	17	1.18	1.3764	0.764962
PotentialPeaks_FAIRE_peak_1433	180	25	18	8	7	1.17685	0.906762	0.404262
PotentialPeaks_FAIRE_peak_1434	158	15	9	6	12	0.657011	0.346671	0.162246
PotentialPeaks_FAIRE_peak_1435	186	13	13	13	12	0.560796	0.560796	0.560796
PotentialPeaks_FAIRE_peak_1436	153	13	11	2	5	0.726641	0.623548	0.0385853
PotentialPeaks_FAIRE_peak_1437	229	27	10	12	9	1.19784	0.472011	0.578926
PotentialPeaks_FAIRE_peak_1438	279	34	32	14	27	1.04485	0.985954	0.307882
PotentialPeaks_FAIRE_peak_1439	194	19	8	9	9	0.900854	0.356533	0.415427
PotentialPeaks_FAIRE_peak_1440	234	20	11	20	19	0.724008	0.308971	0.724008
PotentialPeaks_FAIRE_peak_1441	876	141	133	59	37	2.5246	2.44915	1.4588
PotentialPeaks_FAIRE_peak_1442	176	14	13	8	9	0.678462	0.629552	0.356533
PotentialPeaks_FAIRE_peak_1443	331	57	50	19	8	1.98506	1.83963	0.924521
PotentialPeaks_FAIRE_peak_1444	641	102	92	41	10	2.63093	2.50317	1.58118
PotentialPeaks_FAIRE_peak_1445	427	120	86	36	14	2.7462	2.33116	1.35917
PotentialPeaks_FAIRE_peak_1446	507	158	127	83	24	2.89946	2.61639	2.08587
PotentialPeaks_FAIRE_peak_1447	230	14	16	2	3	0.826661	0.919771	0.0896955
PotentialPeaks_FAIRE_peak_1448	264	54	38	19	10	1.87757	1.50317	0.877569
PotentialPeaks_FAIRE_peak_1449	215	19	20	2	11	0.854654	0.895296	-0.104704
PotentialPeaks_FAIRE_peak_1450	232	22	21	12	13	0.928533	0.890059	0.48796
PotentialPeaks_FAIRE_peak_1451	305	32	21	19	5	1.45362	1.07811	0.997943
PotentialPeaks_FAIRE_peak_1452	293	32	28	8	14	1.2437	1.11816	0.243695
PotentialPeaks_FAIRE_peak_1453	224	33	21	9	14	1.27344	0.868186	0.302589
PotentialPeaks_FAIRE_peak_1454	210	20	22	13	23	0.645433	0.723435	0.333489
PotentialPeaks_FAIRE_peak_1455	183	8	13	0	6	0.428731	0.70175	-0.156231
PotentialPeaks_FAIRE_peak_1456	186	34	9	4	2	1.58988	0.589877	0.267949
PotentialPeaks_FAIRE_peak_1457	218	13	17	6	10	0.606267	0.79268	0.207718
PotentialPeaks_FAIRE_peak_1458	153	10	14	1	4	0.594429	0.80088	-0.0185481
PotentialPeaks_FAIRE_peak_1459	344	49	46	16	4	1.91636	1.84819	0.893989
PotentialPeaks_FAIRE_peak_1460	184	17	11	10	9	0.815965	0.526458	0.472011
PotentialPeaks_FAIRE_peak_1461	160	26	16	5	2	1.33834	0.946021	0.338338
PotentialPeaks_FAIRE_peak_1462	814	314	287	105	34	3.64551	3.52236	2.19805
PotentialPeaks_FAIRE_peak_1463	250	7	19	11	9	0.295133	0.900854	0.526458
PotentialPeaks_FAIRE_peak_1464	182	18	15	5	10	0.835749	0.702483	0.140604
PotentialPeaks_FAIRE_peak_1465	258	35	32	17	30	1.01995	0.932488	0.39192
PotentialPeaks_FAIRE_peak_1466	171	13	12	2	10	0.606267	0.555641	-0.0817888
PotentialPeaks_FAIRE_peak_1467	318	58	36	18	26	1.62872	1.1197	0.506725
PotentialPeaks_FAIRE_peak_1468	299	36	32	7	12	1.40325	1.28778	0.226377
PotentialPeaks_FAIRE_peak_1469	210	22	7	4	16	0.863885	0.13952	-0.062114
PotentialPeaks_FAIRE_peak_1470	169	17	14	2	7	0.863693	0.72619	-0.010776
PotentialPeaks_FAIRE_peak_1471	157	12	12	3	5	0.676015	0.676015	0.116588
PotentialPeaks_FAIRE_peak_1472	496	78	50	22	24	2.0111	1.50091	0.704442
PotentialPeaks_FAIRE_peak_1473	153	12	21	2	4	0.701344	1.10344	0.0639141
PotentialPeaks_FAIRE_peak_1474	194	28	30	5	1	1.43219	1.49632	0.365076
PotentialPeaks_FAIRE_peak_1475	247	42	37	9	7	1.67728	1.54722	0.463155
PotentialPeaks_FAIRE_peak_1476	242	35	21	10	3	1.5922	1.12922	0.62021
PotentialPeaks_FAIRE_peak_1477	190	16	17	7	6	0.843769	0.888163	0.367331
PotentialPeaks_FAIRE_peak_1478	392	45	36	15	12	1.63355	1.40325	0.657011
PotentialPeaks_FAIRE_peak_1479	215	53	25	15	11	1.8339	1.08292	0.679568
PotentialPeaks_FAIRE_peak_1480	182	26	25	3	12	1.09513	1.06037	-0.0492578
PotentialPeaks_FAIRE_peak_1481	468	123	113	61	8	2.91418	2.80646	2.06202
PotentialPeaks_FAIRE_peak_1482	192	17	16	5	8	0.839632	0.795238	0.187555
PotentialPeaks_FAIRE_peak_1483	440	37	37	17	16	1.34388	1.34388	0.660352
PotentialPeaks_FAIRE_peak_1484	260	44	23	12	21	1.42115	0.799663	0.321616
PotentialPeaks_FAIRE_peak_1485	173	9	10	4	3	0.563627	0.62021	0.241699
PotentialPeaks_FAIRE_peak_1486	245	36	27	10	4	1.59443	1.32025	0.594429
PotentialPeaks_FAIRE_peak_1487	628	126	102	32	43	2.28607	2.01897	0.721287
PotentialPeaks_FAIRE_peak_1488	302	32	23	16	11	1.31033	1.01077	0.725371
PotentialPeaks_FAIRE_peak_1489	184	18	16	6	4	0.981452	0.893989	0.353421
PotentialPeaks_FAIRE_peak_1490	313	77	55	14	18	2.11357	1.72416	0.481305
PotentialPeaks_FAIRE_peak_1491	272	19	14	6	19	0.683366	0.460974	0.0135151
PotentialPeaks_FAIRE_peak_1492	228	27	21	28	22	0.921019	0.704207	0.954186
PotentialPeaks_FAIRE_peak_1493	345	29	28	23	34	0.77104	0.738619	0.56459
PotentialPeaks_FAIRE_peak_1494	187	13	14	3	3	0.777752	0.826661	0.167698
PotentialPeaks_FAIRE_peak_1495	157	17	11	4	11	0.769765	0.480259	0.0472994
PotentialPeaks_FAIRE_peak_1496	153	7	6	9	4	0.417551	0.353421	0.537845
PotentialPeaks_FAIRE_peak_1497	304	20	17	10	13	0.85053	0.725	0.381045
PotentialPeaks_FAIRE_peak_1498	220	17	13	9	8	0.839632	0.653219	0.439094
PotentialPeaks_FAIRE_peak_1499	153	9	7	3	3	0.563627	0.443332	0.167698
PotentialPeaks_FAIRE_peak_1500	174	14	8	3	4	0.80088	0.478952	0.141917
PotentialPeaks_FAIRE_peak_1501	163	17	10	6	3	0.964165	0.62021	0.379202
PotentialPeaks_FAIRE_peak_1502	200	10	11	7	11	0.425811	0.480259	0.248933
PotentialPeaks_FAIRE_peak_1503	173	13	14	4	13	0.538586	0.587496	0.00253348
PotentialPeaks_FAIRE_peak_1504	153	1	6	14	3	0.00723335	0.379202	0.826661
PotentialPeaks_FAIRE_peak_1505	611	123	62	27	40	2.30133	1.46779	0.608656
PotentialPeaks_FAIRE_peak_1506	164	15	1	9	5	0.822857	-0.0438768	0.512517
PotentialPeaks_FAIRE_peak_1507	223	17	9	3	9	0.815965	0.415427	0.0194984
PotentialPeaks_FAIRE_peak_1508	242	6	13	9	13	0.140037	0.538586	0.324462
PotentialPeaks_FAIRE_peak_1509	280	30	21	19	12	1.22638	0.912268	0.832098
PotentialPeaks_FAIRE_peak_1510	191	9	11	12	11	0.369228	0.480259	0.532726
PotentialPeaks_FAIRE_peak_1511	153	3	9	5	6	0.0916961	0.487625	0.236086
PotentialPeaks_FAIRE_peak_1512	276	13	21	9	17	0.453018	0.80449	0.238893
PotentialPeaks_FAIRE_peak_1513	216	16	10	6	7	0.819299	0.519739	0.278731
PotentialPeaks_FAIRE_peak_1514	158	12	10	3	8	0.602593	0.495677	0.0431651
PotentialPeaks_FAIRE_peak_1515	269	17	18	9	19	0.598478	0.641546	0.19794
PotentialPeaks_FAIRE_peak_1516	223	15	7	13	18	0.528611	0.0979768	0.432396
PotentialPeaks_FAIRE_peak_1517	154	11	4	8	13	0.435493	0.00253348	0.265568
PotentialPeaks_FAIRE_peak_1518	158	5	11	5	7	0.211616	0.574187	0.211616
PotentialPeaks_FAIRE_peak_1519	157	6	10	7	8	0.254669	0.495677	0.3188
PotentialPeaks_FAIRE_peak_1520	277	14	13	23	9	0.678462	0.629552	1.05697
PotentialPeaks_FAIRE_peak_1521	153	9	6	13	10	0.392142	0.207718	0.606267
PotentialPeaks_FAIRE_peak_1522	153	9	7	11	11	0.369228	0.248933	0.480259
PotentialPeaks_FAIRE_peak_1523	343	29	28	15	23	0.967361	0.934939	0.429704
PotentialPeaks_FAIRE_peak_1524	270	13	24	5	11	0.583352	1.0473	0.117689
PotentialPeaks_FAIRE_peak_1525	427	26	30	24	21	0.906578	1.03782	0.836189
PotentialPeaks_FAIRE_peak_1526	153	8	6	5	2	0.530984	0.405453	0.338338
PotentialPeaks_FAIRE_peak_1527	198	15	16	7	7	0.773495	0.819299	0.342861
PotentialPeaks_FAIRE_peak_1528	188	10	9	5	12	0.403254	0.346671	0.0951322
PotentialPeaks_FAIRE_peak_1529	224	15	16	18	4	0.848185	0.893989	0.981452
PotentialPeaks_FAIRE_peak_1530	254	10	10	13	12	0.403254	0.403254	0.560796
PotentialPeaks_FAIRE_peak_1531	161	11	7	7	12	0.457702	0.226377	0.226377
PotentialPeaks_FAIRE_peak_1532	153	9	6	5	3	0.563627	0.379202	0.312088
PotentialPeaks_FAIRE_peak_1533	181	18	13	4	8	0.8827	0.653219	0.117166
PotentialPeaks_FAIRE_peak_1534	246	12	17	7	14	0.466088	0.703127	0.182295
PotentialPeaks_FAIRE_peak_1535	168	15	9	7	10	0.702483	0.392142	0.271848
PotentialPeaks_FAIRE_peak_1536	331	19	20	11	23	0.604791	0.645433	0.230395
PotentialPeaks_FAIRE_peak_1537	192	17	12	8	7	0.863693	0.626654	0.404262
PotentialPeaks_FAIRE_peak_1538	431	46	14	20	19	1.50828	0.460974	0.724008
PotentialPeaks_FAIRE_peak_1539	239	15	14	7	12	0.657011	0.609705	0.226377
PotentialPeaks_FAIRE_peak_1540	186	17	15	6	14	0.703127	0.612929	0.118164
PotentialPeaks_FAIRE_peak_1541	520	134	73	23	34	2.50801	1.75492	0.56459
PotentialPeaks_FAIRE_peak_1542	417	77	69	18	23	2.01467	1.8849	0.56297
PotentialPeaks_FAIRE_peak_1543	333	55	37	10	12	1.85256	1.43074	0.403254
PotentialPeaks_FAIRE_peak_1544	304	53	29	6	15	1.74571	1.12904	0.0966184
PotentialPeaks_FAIRE_peak_1545	166	27	19	2	8	1.2215	0.924521	-0.0348374
PotentialPeaks_FAIRE_peak_1546	287	36	31	14	10	1.44873	1.30288	0.655177
PotentialPeaks_FAIRE_peak_1547	288	57	49	15	5	2.05848	1.89103	0.822857
PotentialPeaks_FAIRE_peak_1548	338	60	63	23	23	1.72344	1.77929	0.76091
PotentialPeaks_FAIRE_peak_1549	253	11	24	17	13	0.435493	1.00253	0.725
PotentialPeaks_FAIRE_peak_1550	264	12	17	8	8	0.602593	0.839632	0.3802
PotentialPeaks_FAIRE_peak_1551	258	34	20	4	18	1.21827	0.74434	-0.103657
PotentialPeaks_FAIRE_peak_1552	199	14	6	4	12	0.609705	0.162246	0.0247428
PotentialPeaks_FAIRE_peak_1553	253	20	15	9	14	0.828658	0.612929	0.302589
PotentialPeaks_FAIRE_peak_1554	158	10	7	5	3	0.62021	0.443332	0.312088
PotentialPeaks_FAIRE_peak_1555	154	3	12	7	14	-0.0933397	0.466088	0.182295
PotentialPeaks_FAIRE_peak_1556	203	6	21	6	10	0.207718	0.95774	0.207718
PotentialPeaks_FAIRE_peak_1557	201	17	14	17	16	0.660352	0.522849	0.660352
PotentialPeaks_FAIRE_peak_1558	224	32	12	13	11	1.31033	0.532726	0.583352
PotentialPeaks_FAIRE_peak_1559	244	35	30	19	18	1.24684	1.09798	0.703698
PotentialPeaks_FAIRE_peak_1560	252	15	16	16	24	0.410711	0.456514	0.456514
PotentialPeaks_FAIRE_peak_1561	153	12	5	9	7	0.626654	0.211616	0.463155
PotentialPeaks_FAIRE_peak_1562	209	10	12	4	5	0.5691	0.676015	0.190588
PotentialPeaks_FAIRE_peak_1563	153	6	7	9	19	0.0135151	0.0776454	0.19794
PotentialPeaks_FAIRE_peak_1564	634	88	83	13	42	1.85196	1.78087	0.00949791
PotentialPeaks_FAIRE_peak_1565	437	45	50	26	17	1.52577	1.63943	0.987354
PotentialPeaks_FAIRE_peak_1566	719	138	99	23	47	2.34389	1.92259	0.362506
PotentialPeaks_FAIRE_peak_1567	311	32	14	7	10	1.33325	0.655177	0.271848
PotentialPeaks_FAIRE_peak_1568	260	27	24	18	11	1.15164	1.0473	0.812834
PotentialPeaks_FAIRE_peak_1569	551	128	86	12	21	2.68419	2.18669	0.321616
PotentialPeaks_FAIRE_peak_1570	320	81	47	9	13	2.28052	1.65789	0.324462
PotentialPeaks_FAIRE_peak_1571	316	33	31	14	13	1.29532	1.23519	0.587496
PotentialPeaks_FAIRE_peak_1572	175	22	18	3	1	1.22069	1.06022	0.220686
PotentialPeaks_FAIRE_peak_1573	194	21	13	6	11	0.934825	0.583352	0.184803
PotentialPeaks_FAIRE_peak_1574	302	36	30	16	12	1.40325	1.22638	0.702815
PotentialPeaks_FAIRE_peak_1575	223	7	11	8	11	0.248933	0.480259	0.310334
PotentialPeaks_FAIRE_peak_1576	153	11	8	2	9	0.526458	0.356533	-0.0585041
PotentialPeaks_FAIRE_peak_1577	197	19	15	2	10	0.877569	0.702483	-0.0817888
PotentialPeaks_FAIRE_peak_1578	260	16	11	10	10	0.748286	0.503174	0.448726
PotentialPeaks_FAIRE_peak_1579	229	4	12	14	13	0.00253348	0.48796	0.587496
PotentialPeaks_FAIRE_peak_1580	186	19	8	4	9	0.900854	0.356533	0.093499
PotentialPeaks_FAIRE_peak_1581	169	8	8	4	10	0.333249	0.333249	0.0702143
PotentialPeaks_FAIRE_peak_1582	226	25	16	12	22	0.852306	0.494754	0.302109
PotentialPeaks_FAIRE_peak_1583	204	16	18	5	7	0.819299	0.906762	0.211616
PotentialPeaks_FAIRE_peak_1584	153	12	4	6	17	0.402392	-0.0830351	0.0544685
PotentialPeaks_FAIRE_peak_1585	253	35	23	24	13	1.35303	0.966008	1.00253
PotentialPeaks_FAIRE_peak_1586	503	85	86	56	31	1.98835	2.00256	1.50006
PotentialPeaks_FAIRE_peak_1587	155	12	7	2	8	0.602593	0.3188	-0.0348374
PotentialPeaks_FAIRE_peak_1588	203	25	18	14	11	1.08292	0.812834	0.632262
PotentialPeaks_FAIRE_peak_1589	153	6	7	7	10	0.207718	0.271848	0.271848
PotentialPeaks_FAIRE_peak_1590	274	18	10	12	18	0.661878	0.274855	0.38177
PotentialPeaks_FAIRE_peak_1591	538	155	121	37	10	3.16614	2.84632	1.47621
PotentialPeaks_FAIRE_peak_1592	153	10	3	4	7	0.519739	0.0672266	0.141227
PotentialPeaks_FAIRE_peak_1593	205	14	13	4	10	0.655177	0.606267	0.0702143
PotentialPeaks_FAIRE_peak_1594	263	37	24	13	14	1.38665	0.980661	0.516714
PotentialPeaks_FAIRE_peak_1595	239	9	14	16	13	0.324462	0.587496	0.680605
PotentialPeaks_FAIRE_peak_1596	276	21	14	11	11	0.934825	0.632262	0.480259
PotentialPeaks_FAIRE_peak_1597	153	10	6	6	16	0.316398	0.0753895	0.0753895
PotentialPeaks_FAIRE_peak_1598	189	11	12	5	10	0.503174	0.555641	0.140604
PotentialPeaks_FAIRE_peak_1599	655	75	26	13	22	2.00255	0.887071	0.352735
PotentialPeaks_FAIRE_peak_1600	247	10	17	5	4	0.594429	0.938383	0.286307
PotentialPeaks_FAIRE_peak_1601	203	11	7	4	15	0.392074	0.160749	-0.0408851
PotentialPeaks_FAIRE_peak_1602	325	47	46	34	9	1.74885	1.72577	1.41543
PotentialPeaks_FAIRE_peak_1603	266	18	16	7	8	0.8827	0.795238	0.3188
PotentialPeaks_FAIRE_peak_1604	166	6	10	3	2	0.405453	0.646461	0.193949
PotentialPeaks_FAIRE_peak_1605	284	14	16	15	23	0.382398	0.475508	0.429704
PotentialPeaks_FAIRE_peak_1606	544	47	42	32	33	1.27325	1.15395	0.880933
PotentialPeaks_FAIRE_peak_1607	193	9	22	4	11	0.369228	0.973299	0.0472994
PotentialPeaks_FAIRE_peak_1608	237	23	17	25	19	0.839486	0.598478	0.911635
PotentialPeaks_FAIRE_peak_1609	269	57	43	28	16	1.80578	1.4986	1.07539
PotentialPeaks_FAIRE_peak_1610	523	62	70	28	35	1.548	1.68886	0.722028
PotentialPeaks_FAIRE_peak_1611	168	7	5	9	8	0.3188	0.187555	0.439094
PotentialPeaks_FAIRE_peak_1612	233	18	4	16	10	0.835749	0.0702143	0.748286
PotentialPeaks_FAIRE_peak_1613	249	13	9	17	7	0.67728	0.463155	0.863693
PotentialPeaks_FAIRE_peak_1614	180	10	6	7	11	0.425811	0.184803	0.248933
PotentialPeaks_FAIRE_peak_1615	225	13	11	7	6	0.70175	0.598656	0.367331
PotentialPeaks_FAIRE_peak_1616	173	12	9	11	4	0.701344	0.537845	0.648877
PotentialPeaks_FAIRE_peak_1617	282	17	8	9	14	0.703127	0.243695	0.302589
PotentialPeaks_FAIRE_peak_1618	206	10	8	12	8	0.495677	0.3802	0.602593
PotentialPeaks_FAIRE_peak_1619	205	17	17	19	20	0.578429	0.578429	0.663318
PotentialPeaks_FAIRE_peak_1620	303	14	18	12	16	0.522849	0.703421	0.423313
PotentialPeaks_FAIRE_peak_1621	236	19	17	12	21	0.643544	0.558655	0.321616
PotentialPeaks_FAIRE_peak_1622	596	121	110	50	10	2.84632	2.72557	1.79268
PotentialPeaks_FAIRE_peak_1623	241	38	21	9	25	1.19266	0.647222	0.0816244
PotentialPeaks_FAIRE_peak_1624	162	7	12	10	6	0.367331	0.651124	0.544208
PotentialPeaks_FAIRE_peak_1625	156	7	6	12	6	0.367331	0.3032	0.651124
PotentialPeaks_FAIRE_peak_1626	222	13	17	9	6	0.70175	0.888163	0.487625
PotentialPeaks_FAIRE_peak_1627	286	20	15	14	11	0.895296	0.679568	0.632262
PotentialPeaks_FAIRE_peak_1628	366	25	12	17	36	0.603747	0.0535499	0.290589
PotentialPeaks_FAIRE_peak_1629	177	8	9	12	18	0.159377	0.218271	0.38177
PotentialPeaks_FAIRE_peak_1630	178	9	9	13	9	0.415427	0.415427	0.629552
PotentialPeaks_FAIRE_peak_1631	169	11	13	6	3	0.674658	0.777752	0.379202
PotentialPeaks_FAIRE_peak_1632	219	18	5	11	23	0.56297	-0.132175	0.230395
PotentialPeaks_FAIRE_peak_1633	160	20	9	2	10	0.918211	0.392142	-0.0817888
PotentialPeaks_FAIRE_peak_1634	167	15	6	6	11	0.679568	0.184803	0.184803
PotentialPeaks_FAIRE_peak_1635	199	16	14	7	14	0.658733	0.565623	0.182295
PotentialPeaks_FAIRE_peak_1636	155	11	7	7	4	0.648877	0.417551	0.417551
PotentialPeaks_FAIRE_peak_1637	185	16	4	7	7	0.819299	0.141227	0.342861
PotentialPeaks_FAIRE_peak_1638	316	25	16	17	22	0.852306	0.494754	0.539148
PotentialPeaks_FAIRE_peak_1639	202	10	5	29	14	0.359172	0.0510502	1.15059
PotentialPeaks_FAIRE_peak_1640	167	10	12	4	13	0.381045	0.48796	0.00253348
PotentialPeaks_FAIRE_peak_1641	182	23	12	11	11	1.01077	0.532726	0.480259
PotentialPeaks_FAIRE_peak_1642	262	39	21	36	22	1.27611	0.704207	1.19519
PotentialPeaks_FAIRE_peak_1643	156	8	7	8	6	0.428731	0.367331	0.428731
PotentialPeaks_FAIRE_peak_1644	190	18	10	14	19	0.641546	0.254523	0.460974
PotentialPeaks_FAIRE_peak_1645	252	27	16	19	16	1.04222	0.615958	0.745241
PotentialPeaks_FAIRE_peak_1646	254	19	15	14	19	0.683366	0.50828	0.460974
PotentialPeaks_FAIRE_peak_1647	225	15	16	7	10	0.702483	0.748286	0.271848
PotentialPeaks_FAIRE_peak_1648	769	94	80	43	33	2.07733	1.88093	1.17861
PotentialPeaks_FAIRE_peak_1649	200	13	8	7	9	0.629552	0.356533	0.295133
PotentialPeaks_FAIRE_peak_1650	166	10	4	8	8	0.495677	0.117166	0.3802
PotentialPeaks_FAIRE_peak_1651	153	10	9	0	5	0.5691	0.512517	-0.13134
PotentialPeaks_FAIRE_peak_1652	327	32	25	11	25	1.02273	0.79532	0.192656
PotentialPeaks_FAIRE_peak_1653	510	63	35	16	17	1.89882	1.26746	0.595037
PotentialPeaks_FAIRE_peak_1654	163	12	10	4	10	0.555641	0.448726	0.0702143
PotentialPeaks_FAIRE_peak_1655	153	10	6	6	2	0.646461	0.405453	0.405453
PotentialPeaks_FAIRE_peak_1656	262	27	18	9	15	1.06345	0.72465	0.281043
PotentialPeaks_FAIRE_peak_1657	189	7	8	5	15	0.160749	0.222149	0.0295042
PotentialPeaks_FAIRE_peak_1658	182	7	14	6	10	0.271848	0.655177	0.207718
PotentialPeaks_FAIRE_peak_1659	259	9	22	15	19	0.19794	0.802011	0.50828
PotentialPeaks_FAIRE_peak_1660	197	12	4	6	12	0.51017	0.0247428	0.162246
PotentialPeaks_FAIRE_peak_1661	153	7	5	4	10	0.271848	0.140604	0.0702143
PotentialPeaks_FAIRE_peak_1662	153	3	6	8	5	0.116588	0.328092	0.453623
PotentialPeaks_FAIRE_peak_1663	294	26	14	10	16	1.00828	0.522849	0.316398
PotentialPeaks_FAIRE_peak_1664	244	20	16	15	10	0.918211	0.748286	0.702483
PotentialPeaks_FAIRE_peak_1665	344	76	43	18	12	2.22638	1.58546	0.790278
PotentialPeaks_FAIRE_peak_1666	184	11	17	12	14	0.41362	0.703127	0.466088
PotentialPeaks_FAIRE_peak_1667	175	14	20	3	6	0.750659	1.01369	0.0916961
PotentialPeaks_FAIRE_peak_1668	167	20	19	8	6	1.01369	0.973052	0.428731
PotentialPeaks_FAIRE_peak_1669	357	52	55	30	9	1.85903	1.92132	1.29513
PotentialPeaks_FAIRE_peak_1670	273	47	40	12	23	1.45279	1.28286	0.282862
PotentialPeaks_FAIRE_peak_1671	295	16	20	6	4	0.893989	1.06391	0.353421
PotentialPeaks_FAIRE_peak_1672	462	99	92	42	21	2.35975	2.26915	1.37224
PotentialPeaks_FAIRE_peak_1673	167	23	6	3	15	0.922589	0.0966184	-0.114886
PotentialPeaks_FAIRE_peak_1674	247	25	15	7	5	1.22621	0.822857	0.392222
PotentialPeaks_FAIRE_peak_1675	372	49	22	15	13	1.70297	0.928533	0.634802
PotentialPeaks_FAIRE_peak_1676	217	13	12	4	13	0.538586	0.48796	0.00253348
PotentialPeaks_FAIRE_peak_1677	158	14	7	6	10	0.655177	0.271848	0.207718
PotentialPeaks_FAIRE_peak_1678	214	19	13	14	11	0.854654	0.583352	0.632262
PotentialPeaks_FAIRE_peak_1679	270	34	26	28	17	1.23889	0.987354	1.05447
PotentialPeaks_FAIRE_peak_1680	218	9	20	7	13	0.324462	0.85053	0.204167
PotentialPeaks_FAIRE_peak_1681	246	30	11	6	14	1.18229	0.41362	0.118164
PotentialPeaks_FAIRE_peak_1682	609	108	39	26	37	2.18417	1.01134	0.622295
PotentialPeaks_FAIRE_peak_1683	166	18	7	9	9	0.859034	0.295133	0.415427
PotentialPeaks_FAIRE_peak_1684	266	23	12	26	13	0.966008	0.48796	1.07292
PotentialPeaks_FAIRE_peak_1685	259	17	14	11	20	0.578429	0.440925	0.288922
PotentialPeaks_FAIRE_peak_1686	159	15	8	6	8	0.749434	0.3802	0.254669
PotentialPeaks_FAIRE_peak_1687	176	11	5	4	6	0.598656	0.236086	0.165697
PotentialPeaks_FAIRE_peak_1688	167	8	11	9	2	0.530984	0.700909	0.589877
PotentialPeaks_FAIRE_peak_1689	153	7	11	2	6	0.367331	0.598656	0.0136936
PotentialPeaks_FAIRE_peak_1690	215	19	15	13	25	0.567051	0.391965	0.295749
PotentialPeaks_FAIRE_peak_1691	483	29	23	18	21	1.00611	0.799663	0.601723
PotentialPeaks_FAIRE_peak_1692	179	12	4	4	5	0.676015	0.190588	0.190588
PotentialPeaks_FAIRE_peak_1693	336	69	59	35	25	1.84716	1.66659	1.11019
PotentialPeaks_FAIRE_peak_1694	161	10	14	3	11	0.425811	0.632262	-0.0267012
PotentialPeaks_FAIRE_peak_1695	153	13	8	3	6	0.70175	0.428731	0.0916961
PotentialPeaks_FAIRE_peak_1696	274	16	26	25	15	0.637187	1.0295	0.994739
PotentialPeaks_FAIRE_peak_1697	166	9	14	4	12	0.346671	0.609705	0.0247428
PotentialPeaks_FAIRE_peak_1698	350	63	49	29	15	1.94097	1.65955	1.12904
PotentialPeaks_FAIRE_peak_1699	171	13	8	9	7	0.67728	0.404262	0.463155
PotentialPeaks_FAIRE_peak_1700	236	13	21	14	27	0.258972	0.610444	0.307882
PotentialPeaks_FAIRE_peak_1701	328	23	18	11	14	0.944135	0.746196	0.41362
PotentialPeaks_FAIRE_peak_1702	180	15	7	4	15	0.591383	0.160749	-0.0408851
PotentialPeaks_FAIRE_peak_1703	248	31	21	13	20	1.08862	0.743488	0.392016
PotentialPeaks_FAIRE_peak_1704	216	24	11	11	6	1.1657	0.598656	0.598656
PotentialPeaks_FAIRE_peak_1705	318	26	30	12	5	1.26098	1.39222	0.676015
PotentialPeaks_FAIRE_peak_1706	161	9	10	3	4	0.537845	0.594429	0.141917
PotentialPeaks_FAIRE_peak_1707	153	10	8	5	13	0.381045	0.265568	0.0729228
PotentialPeaks_FAIRE_peak_1708	209	25	13	2	6	1.20132	0.70175	0.0136936
PotentialPeaks_FAIRE_peak_1709	153	8	6	6	13	0.265568	0.140037	0.140037
PotentialPeaks_FAIRE_peak_1710	192	19	11	6	8	0.924521	0.550125	0.254669
PotentialPeaks_FAIRE_peak_1711	188	3	16	8	14	-0.0933397	0.658733	0.243695
PotentialPeaks_FAIRE_peak_1712	205	14	10	19	7	0.72619	0.519739	0.948582
PotentialPeaks_FAIRE_peak_1713	180	10	9	12	15	0.337627	0.281043	0.444542
PotentialPeaks_FAIRE_peak_1714	199	15	17	7	12	0.657011	0.747209	0.226377
PotentialPeaks_FAIRE_peak_1715	205	11	11	11	15	0.392074	0.392074	0.392074
PotentialPeaks_FAIRE_peak_1716	184	13	9	7	12	0.560796	0.346671	0.226377
PotentialPeaks_FAIRE_peak_1717	268	15	24	7	11	0.679568	1.0473	0.248933
PotentialPeaks_FAIRE_peak_1718	158	8	8	7	7	0.404262	0.404262	0.342861
PotentialPeaks_FAIRE_peak_1719	221	9	20	6	4	0.537845	1.06391	0.353421
PotentialPeaks_FAIRE_peak_1720	175	10	11	4	8	0.495677	0.550125	0.117166
PotentialPeaks_FAIRE_peak_1721	270	11	14	12	15	0.392074	0.544077	0.444542
PotentialPeaks_FAIRE_peak_1722	362	18	27	11	13	0.768068	1.10687	0.435493
PotentialPeaks_FAIRE_peak_1723	159	9	7	5	12	0.346671	0.226377	0.0951322
PotentialPeaks_FAIRE_peak_1724	153	7	7	12	8	0.3188	0.3188	0.602593
PotentialPeaks_FAIRE_peak_1725	162	9	3	10	6	0.487625	0.0916961	0.544208
PotentialPeaks_FAIRE_peak_1726	329	16	32	9	15	0.637187	1.22215	0.281043
PotentialPeaks_FAIRE_peak_1727	275	16	14	7	9	0.771571	0.678462	0.295133
PotentialPeaks_FAIRE_peak_1728	169	9	16	6	1	0.616614	0.972758	0.43219
PotentialPeaks_FAIRE_peak_1729	215	30	17	26	13	1.20417	0.725	1.07292
PotentialPeaks_FAIRE_peak_1730	217	14	14	5	14	0.565623	0.565623	0.0510502
PotentialPeaks_FAIRE_peak_1731	228	10	8	12	12	0.403254	0.287777	0.51017
PotentialPeaks_FAIRE_peak_1732	165	11	8	5	4	0.648877	0.478952	0.286307
PotentialPeaks_FAIRE_peak_1733	193	9	11	4	5	0.512517	0.623548	0.190588
PotentialPeaks_FAIRE_peak_1734	153	15	4	8	3	0.873967	0.241699	0.504733
PotentialPeaks_FAIRE_peak_1735	164	7	12	6	2	0.469583	0.753376	0.405453
PotentialPeaks_FAIRE_peak_1736	210	12	13	12	7	0.626654	0.67728	0.626654
PotentialPeaks_FAIRE_peak_1737	199	16	9	4	9	0.771571	0.415427	0.093499
PotentialPeaks_FAIRE_peak_1738	181	16	20	5	10	0.748286	0.918211	0.140604
PotentialPeaks_FAIRE_peak_1739	166	8	8	4	5	0.453623	0.453623	0.190588
PotentialPeaks_FAIRE_peak_1740	153	15	9	0	2	0.900217	0.589877	-0.053979
PotentialPeaks_FAIRE_peak_1741	154	5	9	5	8	0.187555	0.439094	0.187555
PotentialPeaks_FAIRE_peak_1742	277	11	14	19	8	0.550125	0.702128	0.924521
PotentialPeaks_FAIRE_peak_1743	728	60	73	32	28	1.63088	1.85868	0.967911
PotentialPeaks_FAIRE_peak_1744	195	21	11	17	11	0.934825	0.480259	0.769765
PotentialPeaks_FAIRE_peak_1745	196	15	17	7	5	0.822857	0.913054	0.392222
PotentialPeaks_FAIRE_peak_1746	727	120	98	42	50	2.12169	1.86712	0.892213
PotentialPeaks_FAIRE_peak_1747	191	15	11	5	9	0.725767	0.526458	0.163888
PotentialPeaks_FAIRE_peak_1748	178	8	14	8	3	0.504733	0.826661	0.504733
PotentialPeaks_FAIRE_peak_1749	324	37	21	9	18	1.30234	0.783868	0.218271
PotentialPeaks_FAIRE_peak_1750	330	21	21	6	11	0.934825	0.934825	0.184803
PotentialPeaks_FAIRE_peak_1751	205	20	11	4	8	0.965163	0.550125	0.117166
PotentialPeaks_FAIRE_peak_1752	262	26	16	14	11	1.11769	0.725371	0.632262
PotentialPeaks_FAIRE_peak_1753	286	39	37	32	38	0.9953	0.941861	0.798903
PotentialPeaks_FAIRE_peak_1754	369	20	44	27	28	0.552873	1.28984	0.809213
PotentialPeaks_FAIRE_peak_1755	172	13	7	13	20	0.392016	0.0575966	0.392016
PotentialPeaks_FAIRE_peak_1756	264	26	30	16	9	1.16389	1.29513	0.771571
PotentialPeaks_FAIRE_peak_1757	240	26	17	18	16	1.00828	0.660352	0.703421
PotentialPeaks_FAIRE_peak_1758	153	11	15	11	15	0.392074	0.591383	0.392074
PotentialPeaks_FAIRE_peak_1759	184	19	17	4	7	0.948582	0.863693	0.141227
PotentialPeaks_FAIRE_peak_1760	153	6	16	6	7	0.278731	0.819299	0.278731
PotentialPeaks_FAIRE_peak_1761	156	3	14	9	29	-0.386944	0.272019	0.0089843
PotentialPeaks_FAIRE_peak_1762	301	22	39	29	42	0.399444	0.932877	0.64337
PotentialPeaks_FAIRE_peak_1763	288	20	50	18	28	0.552873	1.42734	0.470411
PotentialPeaks_FAIRE_peak_1764	342	75	86	67	85	1.11808	1.28271	0.985321
PotentialPeaks_FAIRE_peak_1765	320	37	38	27	22	1.22267	1.24964	0.921019
PotentialPeaks_FAIRE_peak_1766	162	11	15	9	11	0.480259	0.679568	0.369228
PotentialPeaks_FAIRE_peak_1767	162	6	11	8	12	0.162246	0.457702	0.287777
PotentialPeaks_FAIRE_peak_1768	240	17	19	14	20	0.578429	0.663318	0.440925
PotentialPeaks_FAIRE_peak_1769	562	125	173	97	148	1.20553	1.62822	0.886159
PotentialPeaks_FAIRE_peak_1770	282	40	75	44	66	0.632248	1.33269	0.731784
PotentialPeaks_FAIRE_peak_1771	1303	338	564	282	412	1.32135	2.03365	1.07291
PotentialPeaks_FAIRE_peak_1772	217	13	31	12	16	0.473939	1.17055	0.423313
PotentialPeaks_FAIRE_peak_1773	215	12	25	10	37	0.0373324	0.58753	-0.0695828
PotentialPeaks_FAIRE_peak_1774	153	9	11	11	11	0.369228	0.480259	0.480259
PotentialPeaks_FAIRE_peak_1775	256	31	35	16	29	0.919717	1.03755	0.365128
PotentialPeaks_FAIRE_peak_1776	185	21	11	12	13	0.890059	0.435493	0.48796
PotentialPeaks_FAIRE_peak_1777	185	10	9	5	9	0.472011	0.415427	0.163888
PotentialPeaks_FAIRE_peak_1778	154	7	3	17	6	0.367331	0.0916961	0.888163
PotentialPeaks_FAIRE_peak_1779	209	17	15	8	5	0.913054	0.822857	0.453623
PotentialPeaks_FAIRE_peak_1780	248	39	32	27	11	1.50673	1.31033	1.15164
PotentialPeaks_FAIRE_peak_1781	349	36	41	12	14	1.35917	1.49162	0.466088
PotentialPeaks_FAIRE_peak_1782	272	29	51	15	15	1.12904	1.70328	0.591383
PotentialPeaks_FAIRE_peak_1783	402	29	38	23	14	1.15059	1.41362	0.944135
PotentialPeaks_FAIRE_peak_1784	200	24	17	10	20	0.855963	0.578429	0.234474
PotentialPeaks_FAIRE_peak_1785	257	51	48	27	9	1.83766	1.77157	1.19784
PotentialPeaks_FAIRE_peak_1786	309	38	32	17	12	1.4577	1.28778	0.747209
PotentialPeaks_FAIRE_peak_1787	178	14	9	3	10	0.655177	0.392142	-0.00378629
PotentialPeaks_FAIRE_peak_1788	210	17	11	10	4	0.938383	0.648877	0.594429
PotentialPeaks_FAIRE_peak_1789	491	40	43	30	24	1.26387	1.33916	0.980076
PotentialPeaks_FAIRE_peak_1790	211	19	16	22	10	0.877569	0.748286	0.996214
PotentialPeaks_FAIRE_peak_1791	293	29	24	15	10	1.24014	1.07021	0.702483
PotentialPeaks_FAIRE_peak_1792	238	37	19	25	16	1.34388	0.745241	0.97351
PotentialPeaks_FAIRE_peak_1793	161	4	14	5	5	0.190588	0.775551	0.260978
PotentialPeaks_FAIRE_peak_1794	332	24	18	33	15	0.959115	0.72465	1.2519
PotentialPeaks_FAIRE_peak_1795	176	17	7	3	13	0.725	0.204167	-0.0714671
PotentialPeaks_FAIRE_peak_1796	241	42	24	13	15	1.49517	0.959115	0.495168
PotentialPeaks_FAIRE_peak_1797	576	106	90	56	40	2.11313	1.91031	1.35232
PotentialPeaks_FAIRE_peak_1798	276	14	11	13	8	0.702128	0.550125	0.653219
PotentialPeaks_FAIRE_peak_1799	470	120	85	49	28	2.47041	2.04116	1.40532
PotentialPeaks_FAIRE_peak_1800	280	40	47	18	17	1.40239	1.57232	0.6825
PotentialPeaks_FAIRE_peak_1801	411	24	25	12	13	1.00253	1.03816	0.48796
PotentialPeaks_FAIRE_peak_1802	321	46	36	9	11	1.67957	1.42581	0.369228
PotentialPeaks_FAIRE_peak_1803	166	14	9	3	8	0.702128	0.439094	0.0431651
PotentialPeaks_FAIRE_peak_1804	238	26	13	11	5	1.26098	0.726641	0.623548
PotentialPeaks_FAIRE_peak_1805	395	32	34	6	13	1.26557	1.32446	0.140037
PotentialPeaks_FAIRE_peak_1806	245	31	19	29	24	1.0111	0.585797	0.948368
PotentialPeaks_FAIRE_peak_1807	209	24	26	15	1	1.29469	1.36508	0.926954
PotentialPeaks_FAIRE_peak_1808	478	187	126	78	15	3.30252	2.78693	2.19178
PotentialPeaks_FAIRE_peak_1809	220	29	19	10	12	1.19467	0.832098	0.403254
PotentialPeaks_FAIRE_peak_1810	303	26	33	6	14	1.05105	1.27344	0.118164
PotentialPeaks_FAIRE_peak_1811	153	5	11	2	6	0.236086	0.598656	0.0136936
PotentialPeaks_FAIRE_peak_1812	158	22	5	3	6	1.0917	0.236086	0.0916961
PotentialPeaks_FAIRE_peak_1813	156	9	11	5	4	0.537845	0.648877	0.286307
PotentialPeaks_FAIRE_peak_1814	204	32	23	10	11	1.31033	1.01077	0.425811
PotentialPeaks_FAIRE_peak_1815	166	14	14	8	7	0.72619	0.72619	0.404262
PotentialPeaks_FAIRE_peak_1816	340	106	80	36	8	2.72597	2.3802	1.49568
PotentialPeaks_FAIRE_peak_1817	252	23	31	8	12	0.988217	1.2574	0.287777
PotentialPeaks_FAIRE_peak_1818	389	63	64	34	25	1.74155	1.7597	1.08162
PotentialPeaks_FAIRE_peak_1819	262	31	37	12	14	1.21332	1.38665	0.466088
PotentialPeaks_FAIRE_peak_1820	191	21	16	3	7	1.02875	0.819299	0.0672266
PotentialPeaks_FAIRE_peak_1821	287	36	35	5	11	1.42581	1.3978	0.117689
PotentialPeaks_FAIRE_peak_1822	297	21	12	12	12	0.912268	0.51017	0.51017
PotentialPeaks_FAIRE_peak_1823	623	190	212	73	25	3.12427	3.27066	1.9135
PotentialPeaks_FAIRE_peak_1824	240	36	22	17	19	1.25452	0.802011	0.598478
PotentialPeaks_FAIRE_peak_1825	189	42	18	12	9	1.62955	0.859034	0.578926
PotentialPeaks_FAIRE_peak_1826	455	145	91	18	13	3.01152	2.42207	0.768068
PotentialPeaks_FAIRE_peak_1827	344	75	53	15	15	2.14498	1.74571	0.591383
PotentialPeaks_FAIRE_peak_1828	346	101	96	43	21	2.38463	2.32162	1.3969
PotentialPeaks_FAIRE_peak_1829	558	207	167	58	10	3.54919	3.26399	1.95774
PotentialPeaks_FAIRE_peak_1830	290	55	33	32	18	1.72416	1.18912	1.15938
PotentialPeaks_FAIRE_peak_1831	700	155	81	60	40	2.60024	1.7823	1.43032
PotentialPeaks_FAIRE_peak_1832	473	38	25	25	24	1.2114	0.814066	0.814066
PotentialPeaks_FAIRE_peak_1833	222	16	9	15	20	0.534035	0.177891	0.488231
PotentialPeaks_FAIRE_peak_1834	160	9	8	6	8	0.439094	0.3802	0.254669
PotentialPeaks_FAIRE_peak_1835	213	14	11	23	18	0.481305	0.329302	0.859817
PotentialPeaks_FAIRE_peak_1836	288	67	14	13	9	2.14661	0.678462	0.629552
PotentialPeaks_FAIRE_peak_1837	153	12	7	7	8	0.602593	0.3188	0.3188
PotentialPeaks_FAIRE_peak_1838	220	12	16	9	11	0.532726	0.725371	0.369228
PotentialPeaks_FAIRE_peak_1839	337	44	31	22	12	1.60971	1.2574	0.950742
PotentialPeaks_FAIRE_peak_1840	317	44	44	27	3	1.82666	1.82666	1.34604
PotentialPeaks_FAIRE_peak_1841	769	101	81	27	21	2.38463	2.11417	0.940525
PotentialPeaks_FAIRE_peak_1842	168	4	12	8	9	0.093499	0.578926	0.356533
PotentialPeaks_FAIRE_peak_1843	258	30	18	10	9	1.29513	0.859034	0.472011
PotentialPeaks_FAIRE_peak_1844	235	12	12	11	20	0.34139	0.34139	0.288922
PotentialPeaks_FAIRE_peak_1845	205	24	8	4	15	0.959115	0.222149	-0.0408851
PotentialPeaks_FAIRE_peak_1846	468	92	51	19	24	2.2114	1.5226	0.585797
PotentialPeaks_FAIRE_peak_1847	1086	209	121	49	58	2.73955	2.0238	0.948137
PotentialPeaks_FAIRE_peak_1848	552	69	30	33	24	1.86591	0.980076	1.07122
PotentialPeaks_FAIRE_peak_1849	175	26	12	5	10	1.1406	0.555641	0.140604
PotentialPeaks_FAIRE_peak_1850	396	57	43	30	35	1.45242	1.14524	0.786159
PotentialPeaks_FAIRE_peak_1851	305	19	23	12	6	0.973052	1.12917	0.651124
PotentialPeaks_FAIRE_peak_1852	181	21	18	2	3	1.12922	1.00723	0.0896955
PotentialPeaks_FAIRE_peak_1853	272	56	29	20	11	1.8953	1.21722	0.895296
PotentialPeaks_FAIRE_peak_1854	345	77	59	36	25	1.97693	1.66659	1.13821
PotentialPeaks_FAIRE_peak_1855	309	51	32	13	15	1.70328	1.22215	0.495168
PotentialPeaks_FAIRE_peak_1856	180	10	12	6	14	0.359172	0.466088	0.118164
PotentialPeaks_FAIRE_peak_1857	153	8	9	7	4	0.478952	0.537845	0.417551
PotentialPeaks_FAIRE_peak_1858	409	99	77	58	9	2.61706	2.31073	1.98102
PotentialPeaks_FAIRE_peak_1859	194	21	9	11	13	0.890059	0.324462	0.435493
PotentialPeaks_FAIRE_peak_1860	153	11	10	1	4	0.648877	0.594429	-0.0185481
PotentialPeaks_FAIRE_peak_1861	189	7	12	5	9	0.295133	0.578926	0.163888
PotentialPeaks_FAIRE_peak_1862	153	13	8	2	2	0.804002	0.530984	0.115946
PotentialPeaks_FAIRE_peak_1863	201	10	17	12	3	0.62021	0.964165	0.727125
PotentialPeaks_FAIRE_peak_1864	209	14	6	11	14	0.565623	0.118164	0.41362
PotentialPeaks_FAIRE_peak_1865	180	10	10	6	6	0.544208	0.544208	0.3032
PotentialPeaks_FAIRE_peak_1866	384	131	66	45	16	2.81563	1.97351	1.5467
PotentialPeaks_FAIRE_peak_1867	232	18	36	14	12	0.790278	1.40325	0.609705
PotentialPeaks_FAIRE_peak_1868	173	7	7	6	7	0.342861	0.342861	0.278731
PotentialPeaks_FAIRE_peak_1869	163	6	9	9	7	0.278731	0.463155	0.463155
PotentialPeaks_FAIRE_peak_1870	547	58	47	20	13	1.89006	1.65789	0.85053
PotentialPeaks_FAIRE_peak_1871	279	13	20	16	15	0.495168	0.807112	0.637187
PotentialPeaks_FAIRE_peak_1872	153	9	13	10	9	0.415427	0.629552	0.472011
PotentialPeaks_FAIRE_peak_1873	440	249	193	111	52	3.05619	2.7137	1.99503
PotentialPeaks_FAIRE_peak_1874	237	36	10	6	12	1.40325	0.403254	0.162246
PotentialPeaks_FAIRE_peak_1875	190	20	16	7	13	0.85053	0.680605	0.204167
PotentialPeaks_FAIRE_peak_1876	255	17	13	13	12	0.747209	0.560796	0.560796
PotentialPeaks_FAIRE_peak_1877	278	33	27	20	16	1.23067	1.04222	0.785883
PotentialPeaks_FAIRE_peak_1878	288	21	14	7	22	0.704207	0.401645	0.0183159
PotentialPeaks_FAIRE_peak_1879	225	15	12	10	14	0.612929	0.466088	0.359172
PotentialPeaks_FAIRE_peak_1880	173	12	11	7	10	0.555641	0.503174	0.271848
PotentialPeaks_FAIRE_peak_1881	255	46	22	20	21	1.46846	0.762188	0.684186
PotentialPeaks_FAIRE_peak_1882	221	36	13	15	4	1.59443	0.75197	0.848185
PotentialPeaks_FAIRE_peak_1883	172	12	10	13	7	0.626654	0.519739	0.67728
PotentialPeaks_FAIRE_peak_1884	395	36	18	15	19	1.25452	0.641546	0.50828
PotentialPeaks_FAIRE_peak_1885	252	33	12	13	22	1.10946	0.302109	0.352735
PotentialPeaks_FAIRE_peak_1886	153	11	9	4	9	0.526458	0.415427	0.093499
PotentialPeaks_FAIRE_peak_1887	159	15	10	3	3	0.873967	0.62021	0.167698
PotentialPeaks_FAIRE_peak_1888	270	21	13	8	10	0.95774	0.606267	0.333249
PotentialPeaks_FAIRE_peak_1889	328	26	31	16	12	1.09513	1.2574	0.702815
PotentialPeaks_FAIRE_peak_1890	264	12	18	13	13	0.48796	0.768068	0.538586
PotentialPeaks_FAIRE_peak_1891	159	16	2	7	6	0.843769	0.0136936	0.367331
PotentialPeaks_FAIRE_peak_1892	270	32	25	10	18	1.15938	0.931967	0.274855
PotentialPeaks_FAIRE_peak_1893	172	24	14	9	7	1.14123	0.72619	0.463155
PotentialPeaks_FAIRE_peak_1894	420	81	42	21	13	2.28052	1.53859	0.890059
PotentialPeaks_FAIRE_peak_1895	310	59	39	33	32	1.54177	1.09431	0.927662
PotentialPeaks_FAIRE_peak_1896	226	16	9	6	13	0.680605	0.324462	0.140037
PotentialPeaks_FAIRE_peak_1897	154	8	10	10	4	0.478952	0.594429	0.594429
PotentialPeaks_FAIRE_peak_1898	192	19	20	11	9	0.900854	0.941496	0.526458
PotentialPeaks_FAIRE_peak_1899	263	49	26	26	15	1.65955	1.0295	1.0295
PotentialPeaks_FAIRE_peak_1900	344	45	32	15	26	1.35	1.00422	0.373459
PotentialPeaks_FAIRE_peak_1901	167	15	11	8	8	0.749434	0.550125	0.3802
PotentialPeaks_FAIRE_peak_1902	410	59	31	8	18	1.80323	1.129	0.159377
PotentialPeaks_FAIRE_peak_1903	242	25	25	6	14	1.01628	1.01628	0.118164
PotentialPeaks_FAIRE_peak_1904	510	44	49	24	29	1.27202	1.3875	0.687056
PotentialPeaks_FAIRE_peak_1905	440	48	61	29	16	1.61596	1.88274	1.10781
PotentialPeaks_FAIRE_peak_1906	153	10	8	9	9	0.472011	0.356533	0.415427
PotentialPeaks_FAIRE_peak_1907	174	10	13	9	6	0.544208	0.70175	0.487625
PotentialPeaks_FAIRE_peak_1908	348	37	31	16	5	1.59658	1.42325	0.86866
PotentialPeaks_FAIRE_peak_1909	199	18	10	3	10	0.835749	0.448726	-0.00378629
PotentialPeaks_FAIRE_peak_1910	161	12	5	9	3	0.727125	0.312088	0.563627
PotentialPeaks_FAIRE_peak_1911	584	179	146	65	16	3.22329	2.95581	1.95581
PotentialPeaks_FAIRE_peak_1912	173	20	15	5	8	0.965163	0.749434	0.187555
PotentialPeaks_FAIRE_peak_1913	383	39	19	11	26	1.20062	0.548545	0.17415
PotentialPeaks_FAIRE_peak_1914	283	21	17	11	15	0.84664	0.681581	0.392074
PotentialPeaks_FAIRE_peak_1915	510	38	41	11	30	1.10241	1.18042	0.102413
PotentialPeaks_FAIRE_peak_1916	313	20	20	10	6	1.01369	1.01369	0.544208
PotentialPeaks_FAIRE_peak_1917	295	24	15	21	14	0.980661	0.612929	0.868186
PotentialPeaks_FAIRE_peak_1918	207	22	17	15	11	0.973299	0.769765	0.679568
PotentialPeaks_FAIRE_peak_1919	342	39	24	12	23	1.25687	0.797436	0.282862
PotentialPeaks_FAIRE_peak_1920	181	15	12	7	12	0.657011	0.51017	0.226377
PotentialPeaks_FAIRE_peak_1921	215	17	17	11	3	0.964165	0.964165	0.674658
PotentialPeaks_FAIRE_peak_1922	281	21	27	32	21	0.723714	0.940525	1.09922
PotentialPeaks_FAIRE_peak_1923	175	12	11	10	3	0.727125	0.674658	0.62021
PotentialPeaks_FAIRE_peak_1924	274	17	22	6	12	0.747209	0.950742	0.162246
PotentialPeaks_FAIRE_peak_1925	153	17	2	6	17	0.639431	-0.235038	0.0544685
PotentialPeaks_FAIRE_peak_1926	201	18	13	1	3	1.00723	0.777752	0.00723335
PotentialPeaks_FAIRE_peak_1927	153	17	8	7	8	0.839632	0.3802	0.3188
PotentialPeaks_FAIRE_peak_1928	153	9	7	4	7	0.463155	0.342861	0.141227
PotentialPeaks_FAIRE_peak_1929	169	13	12	5	4	0.75197	0.701344	0.286307
PotentialPeaks_FAIRE_peak_1930	567	155	64	30	33	2.71382	1.6179	0.819533
PotentialPeaks_FAIRE_peak_1931	446	41	28	18	30	1.18042	0.806957	0.434988
PotentialPeaks_FAIRE_peak_1932	175	18	10	5	9	0.859034	0.472011	0.163888
PotentialPeaks_FAIRE_peak_1933	309	72	32	18	6	2.3032	1.42873	0.931231
PotentialPeaks_FAIRE_peak_1934	227	14	9	9	20	0.440925	0.177891	0.177891
PotentialPeaks_FAIRE_peak_1935	167	18	6	10	8	0.8827	0.254669	0.495677
PotentialPeaks_FAIRE_peak_1936	383	73	41	18	16	2.09169	1.44885	0.703421
PotentialPeaks_FAIRE_peak_1937	258	30	20	23	32	0.836514	0.482877	0.598354
PotentialPeaks_FAIRE_peak_1938	177	18	15	5	8	0.8827	0.749434	0.187555
PotentialPeaks_FAIRE_peak_1939	153	9	12	1	3	0.563627	0.727125	0.00723335
PotentialPeaks_FAIRE_peak_1940	354	50	32	7	11	1.76977	1.31033	0.248933
PotentialPeaks_FAIRE_peak_1941	153	9	11	4	9	0.415427	0.526458	0.093499
PotentialPeaks_FAIRE_peak_1942	360	36	27	35	18	1.27485	1.00068	1.24684
PotentialPeaks_FAIRE_peak_1943	184	23	22	6	7	1.1047	1.06723	0.278731
PotentialPeaks_FAIRE_peak_1944	169	31	10	5	3	1.47436	0.62021	0.312088
PotentialPeaks_FAIRE_peak_1945	153	11	7	7	5	0.623548	0.392222	0.392222
PotentialPeaks_FAIRE_peak_1946	195	12	10	8	8	0.602593	0.495677	0.3802
PotentialPeaks_FAIRE_peak_1947	153	16	6	3	7	0.819299	0.278731	0.0672266
PotentialPeaks_FAIRE_peak_1948	261	33	28	10	8	1.40995	1.25467	0.495677
PotentialPeaks_FAIRE_peak_1949	249	14	17	7	11	0.632262	0.769765	0.248933
PotentialPeaks_FAIRE_peak_1950	419	46	30	12	15	1.59138	1.16075	0.444542
PotentialPeaks_FAIRE_peak_1951	209	31	15	11	10	1.30288	0.702483	0.503174
PotentialPeaks_FAIRE_peak_1952	166	10	8	11	8	0.495677	0.3802	0.550125
PotentialPeaks_FAIRE_peak_1953	175	10	12	1	10	0.448726	0.555641	-0.164251
PotentialPeaks_FAIRE_peak_1954	184	9	21	6	14	0.302589	0.868186	0.118164
PotentialPeaks_FAIRE_peak_1955	514	51	75	29	22	1.56084	2.00255	0.986607
PotentialPeaks_FAIRE_peak_1956	222	21	6	3	11	0.934825	0.184803	-0.0267012
PotentialPeaks_FAIRE_peak_1957	197	20	18	3	8	0.965163	0.8827	0.0431651
PotentialPeaks_FAIRE_peak_1958	167	10	9	7	7	0.519739	0.463155	0.342861
PotentialPeaks_FAIRE_peak_1959	297	22	8	17	9	1.0195	0.356533	0.815965
PotentialPeaks_FAIRE_peak_1960	336	24	35	4	5	1.19059	1.54109	0.190588
PotentialPeaks_FAIRE_peak_1961	189	24	13	7	10	1.07021	0.606267	0.271848
PotentialPeaks_FAIRE_peak_1962	226	14	16	10	14	0.565623	0.658733	0.359172
PotentialPeaks_FAIRE_peak_1963	209	20	18	3	9	0.941496	0.859034	0.0194984
PotentialPeaks_FAIRE_peak_1964	365	28	23	14	18	1.03385	0.859817	0.481305
PotentialPeaks_FAIRE_peak_1965	350	42	30	11	11	1.58335	1.24893	0.480259
PotentialPeaks_FAIRE_peak_1966	394	33	21	12	18	1.18912	0.783868	0.38177
PotentialPeaks_FAIRE_peak_1967	333	31	37	15	9	1.32616	1.49949	0.725767
PotentialPeaks_FAIRE_peak_1968	299	76	45	17	6	2.36733	1.77451	0.888163
PotentialPeaks_FAIRE_peak_1969	268	42	47	10	10	1.60627	1.72557	0.448726
PotentialPeaks_FAIRE_peak_1970	207	29	17	5	17	1.08689	0.639431	-0.0126457
PotentialPeaks_FAIRE_peak_1971	226	34	30	8	8	1.43909	1.3188	0.3802
PotentialPeaks_FAIRE_peak_1972	153	14	15	0	11	0.632262	0.679568	-0.274629
PotentialPeaks_FAIRE_peak_1973	211	28	21	5	11	1.1848	0.934825	0.117689
PotentialPeaks_FAIRE_peak_1974	204	40	22	7	19	1.36144	0.802011	0.0776454
PotentialPeaks_FAIRE_peak_1975	157	15	10	4	7	0.773495	0.519739	0.141227
PotentialPeaks_FAIRE_peak_1976	501	60	32	14	14	1.90666	1.2437	0.565623
PotentialPeaks_FAIRE_peak_1977	160	15	9	4	9	0.725767	0.415427	0.093499
PotentialPeaks_FAIRE_peak_1978	156	12	7	8	6	0.651124	0.367331	0.428731
PotentialPeaks_FAIRE_peak_1979	365	43	37	7	19	1.43673	1.282	0.0776454
PotentialPeaks_FAIRE_peak_1980	237	23	20	12	13	0.966008	0.85053	0.48796
PotentialPeaks_FAIRE_peak_1981	198	27	16	22	24	0.882779	0.456514	0.704442
PotentialPeaks_FAIRE_peak_1982	181	19	8	4	4	1.02327	0.478952	0.215917
PotentialPeaks_FAIRE_peak_1983	160	13	14	9	7	0.67728	0.72619	0.463155
PotentialPeaks_FAIRE_peak_1984	263	14	29	6	5	0.775551	1.36051	0.328092
PotentialPeaks_FAIRE_peak_1985	466	54	35	21	23	1.60479	1.14793	0.684961
PotentialPeaks_FAIRE_peak_1986	156	19	8	1	3	1.04905	0.504733	0.00723335
PotentialPeaks_FAIRE_peak_1987	442	51	22	17	11	1.79146	0.973299	0.769765
PotentialPeaks_FAIRE_peak_1988	265	41	14	4	8	1.62813	0.702128	0.117166
PotentialPeaks_FAIRE_peak_1989	265	42	45	22	17	1.45302	1.52577	0.842964
PotentialPeaks_FAIRE_peak_1990	258	38	20	22	19	1.30897	0.724008	0.802011
PotentialPeaks_FAIRE_peak_1991	968	110	154	45	45	2.08369	2.5158	1.03715
PotentialPeaks_FAIRE_peak_1992	246	23	13	2	6	1.12917	0.70175	0.0136936
PotentialPeaks_FAIRE_peak_1993	153	8	9	6	14	0.243695	0.302589	0.118164
PotentialPeaks_FAIRE_peak_1994	186	12	12	10	4	0.701344	0.701344	0.594429
PotentialPeaks_FAIRE_peak_1995	213	17	14	5	11	0.769765	0.632262	0.117689
PotentialPeaks_FAIRE_peak_1996	153	8	8	4	5	0.453623	0.453623	0.190588
PotentialPeaks_FAIRE_peak_1997	170	17	14	6	5	0.913054	0.775551	0.328092
PotentialPeaks_FAIRE_peak_1998	263	21	16	8	8	1.00469	0.795238	0.3802
PotentialPeaks_FAIRE_peak_1999	439	72	35	11	11	2.1848	1.3978	0.480259
[truncated: 60,878 more rows]

## Sheet: FAIRE_PromoterEnrichment
	width	NP_Merged	TND1_Merged	TND10_Merged	Input	NP_MergedEnrichment	TND1_MergedEnrichment	TND10_MergedEnrichment
Lypla1	1000	65	76	32	40	1.13167	1.31019	0.484085
Tcea1	1000	137	126	53	65	1.61146	1.49759	0.592316
Atp6v1h	1000	85	55	28	41	1.42972	0.916007	0.33943
Oprk1	1000	21	29	20	37	0.0639901	0.341372	0.12799
Rb1cc1	1000	56	82	47	48	0.806728	1.24592	0.730068
Fam150a	1000	22	23	9	24	0.410975	0.444417	-0.110527
St18	1000	60	58	29	42	0.999406	0.955629	0.352977
Pcmtd1	1000	206	150	65	49	2.41296	1.98794	1.07535
Rrs1	1000	153	114	66	41	2.17239	1.78863	1.23755
Adhfe1	1000	42	16	21	58	0.321848	-0.542131	-0.201992
3110035E14Rik	1000	40	23	14	48	0.444158	-0.0833919	-0.340321
Sgk3	1000	26	29	16	52	-0.0425602	0.0512065	-0.315164
6030422M02Rik	1000	11	17	4	44	-0.532881	-0.24878	-0.853971
Cspp1	1000	101	95	43	46	1.54439	1.46294	0.670647
Prex2	1000	52	36	26	65	0.441535	0.0482832	-0.123891
A830018L16Rik	1000	71	62	41	52	1.00807	0.844756	0.517726
Sulf1	1000	46	56	27	50	0.554714	0.764757	0.144677
Xkr9	1000	14	14	19	47	-0.437816	-0.443367	-0.100428
Kcnb2	1000	14	24	23	39	-0.280684	0.129217	0.203906
Terf1	1000	169	86	76	48	2.16818	1.30363	1.27635
Rdh10	1000	55	88	28	15	1.57306	2.12073	0.944103
Tmem70	1000	60	66	29	36	1.12399	1.22866	0.470113
Ly96	1000	36	22	36	53	0.248185	-0.210137	0.368776
Gdap1	1000	39	45	40	39	0.593786	0.738026	0.725858
Pi15	1000	10	21	10	40	-0.507738	-0.00391779	-0.400438
Crispld1	1000	19	25	14	33	0.0719188	0.29543	-0.0525104
Tcfap2d	1000	12	21	37	64	-0.82339	-0.42749	0.22622
Tcfap2b	1000	39	23	23	83	-0.113631	-0.61628	-0.469727
Mir206	1000	49	33	20	43	0.754089	0.341076	0.0124187
Mir133b	1000	15	15	9	30	-0.0333732	-0.0379132	-0.25039
Il17a	1000	16	21	20	42	-0.248522	-0.0443712	0.031049
Paqr8	1000	91	67	37	38	1.57479	1.20329	0.666069
Efhc1	1000	139	120	50	43	2.00785	1.81383	0.886888
Tmem14a	1000	58	37	27	60	0.641089	0.153488	-0.0158969
Gsta3	1000	18	18	23	49	-0.293991	-0.299633	0.0209001
Khdc1a	1000	10	7	7	10	0.291604	0.112464	0.160433
Khdc1c	1000	9	16	3	18	-0.0249029	0.327842	-0.351565
Khdc1b	1000	6	10	11	10	0.050596	0.289342	0.391758
Mir30a	1000	41	21	23	63	0.217489	-0.412114	-0.201642
Mir30c-2	1000	12	13	9	56	-0.69581	-0.651109	-0.736204
B3gat2	1000	50	70	27	36	0.920456	1.29737	0.404525
Col9a1	1000	27	26	26	41	0.197774	0.158578	0.272316
Lmbrd1	1000	95	94	49	49	1.41296	1.39426	0.757866
Lgsn	1000	16	24	26	47	-0.344707	-0.0283294	0.162606
4930521A18Rik	1000	14	21	21	20	0.179861	0.478797	0.556462
Gm4850	1000	11	8	9	31	-0.256324	-0.430864	-0.272437
Khdrbs2	1000	93	73	38	34	1.68829	1.39101	0.774406
1700001G17Rik	1000	70	58	34	37	1.2808	1.05897	0.601921
Rab23	1000	66	57	38	46	1.03158	0.858345	0.542892
Dst	1000	70	63	27	24	1.58931	1.4628	0.671881
Imp4	1000	207	152	114	53	2.34865	1.93425	1.6907
Ptpn18	1000	113	76	41	48	1.64803	1.15477	0.585679
Prss39	1000	16	29	14	19	0.301811	0.790149	0.280401
Cfc1	1000	9	8	5	11	0.199851	0.13853	-0.00256337
Fam123c	1000	77	51	39	35	1.43707	0.959111	0.780102
Arhgef4	1000	42	48	25	46	0.532005	0.66852	0.145556
Plekhb2	1000	56	62	34	41	0.941434	1.05166	0.523854
Hs6st1	1000	73	81	19	27	1.56151	1.68139	0.303274
Arid5a	1000	120	88	55	40	1.87929	1.48707	1.04887
Cnnm4	1000	75	79	28	54	1.03837	1.09458	0.111455
Cnnm3	1000	137	105	46	57	1.73765	1.39316	0.558359
Cox5b	1000	134	117	57	53	1.77656	1.59722	0.858161
Zap70	1000	25	34	17	25	0.494379	0.776558	0.265738
Cnga3	1000	27	41	22	34	0.346366	0.748166	0.267446
Inpp4a	1000	66	63	39	52	0.922674	0.863134	0.466195
Unc50	1000	102	101	47	55	1.39625	1.37808	0.613172
Lipt1	1000	84	92	45	60	1.07549	1.18046	0.488576
Mrpl30	1000	104	81	42	67	1.23107	0.917802	0.313186
Eif5b	1000	199	144	75	36	2.62426	2.19303	1.48605
Nms	1000	13	14	12	50	-0.541502	-0.498277	-0.474233
Pdcl3	1000	161	152	46	52	2.03273	1.95167	0.639032
Npas2	1000	38	37	14	18	1.08613	1.05576	0.307398
Rpl31	1000	107	92	39	55	1.45612	1.26261	0.417252
D1Bwg0212e	1000	115	117	53	39	1.84585	1.86257	1.02703
Map4k4	1000	95	84	28	25	1.93124	1.77656	0.680776
Il1r2	1000	35	26	22	45	0.365427	0.0798631	0.0538671
Il1r1	1000	30	23	24	23	0.713315	0.471218	0.592232
Il1rl2	1000	20	36	28	37	0.0244618	0.549959	0.417497
Il1rl1	1000	16	19	25	42	-0.248522	-0.124542	0.218676
Il18r1	1000	18	17	17	44	-0.200306	-0.24878	-0.131505
Il18rap	1000	17	17	19	53	-0.407861	-0.41367	-0.202381
Slc9a4	1000	43	42	22	54	0.413218	0.382707	-0.100049
Slc9a2	1000	48	37	10	8	1.66418	1.3902	0.40299
Tmem182	1000	30	28	20	39	0.335988	0.266721	0.0884286
Pou3f3	1000	24	42	15	20	0.594898	1.12732	0.301205
2900092D14Rik	1000	27	21	21	74	-0.349562	-0.572854	-0.431156
Mrps9	1000	144	103	70	57	1.80219	1.36911	1.03043
Gpr45	1000	33	46	25	37	0.469247	0.803715	0.315617
AI597479	1000	92	118	56	71	1.02107	1.32587	0.569602
Nck2	1000	67	65	27	45	1.06804	1.0274	0.232204
1500015O10Rik	1000	35	25	55	36	0.548488	0.228658	1.12801
Tpp2	1000	189	177	86	65	2.03355	1.9403	1.15622
Bivm	1000	150	98	27	32	2.34057	1.79373	0.488257
Ercc5	1000	104	88	50	62	1.307	1.09441	0.572156
Gulp1	1000	72	37	29	49	1.07798	0.340825	0.227351
Col3a1	1000	8	22	15	53	-0.867292	-0.210137	-0.377468
Wdr75	1000	128	121	82	63	1.55452	1.47646	1.12767
Dnahc7b	1000	26	27	23	47	0.0476108	0.0760072	0.0556911
Tmeff2	1000	127	111	43	25	2.2967	2.12139	1.10399
Sdpr	1000	44	38	28	50	0.507408	0.34972	0.177844
Stat4	1000	37	19	25	32	0.693448	0.0901231	0.419544
Stat1	1000	114	66	36	46	1.69639	1.02607	0.488444
Tmem194b	1000	116	82	32	46	1.71842	1.28323	0.372967
Hibch	1000	173	137	68	34	2.48234	2.17266	1.41184
Mstn	1000	20	24	14	68	-0.520615	-0.374929	-0.651988
Ormdl1	1000	97	128	45	55	1.33379	1.67764	0.56663
Osgepl1	1000	48	68	31	72	0.252045	0.637935	-0.059288
Mir1937b-5	1000	0	0	0	0	0	0	0
Mir1937b-2	1000	0	0	0	0	0	0	0
Mir1937b-4	1000	0	0	0	0	0	0	0
Ccdc150	1000	131	115	87	43	1.93139	1.75979	1.52899
Coq10b	1000	130	121	78	41	1.96133	1.86429	1.43459
Hspe1	1000	178	168	81	15	3.02323	2.94386	2.08458
Mobkl3	1000	116	100	67	78	1.21439	1.0214	0.682407
Mars2	1000	127	93	51	64	1.52913	1.13124	0.564389
Plcl1	1000	129	97	42	60	1.61154	1.24575	0.415819
9130024F11Rik	1000	38	37	13	30	0.767318	0.735811	-0.0362652
1700066M21Rik	1000	100	89	47	39	1.67041	1.52153	0.895783
9430016H08Rik	1000	72	51	37	29	1.4959	1.09809	0.856063
Spats2l	1000	78	61	31	38	1.38792	1.09504	0.492738
Sgol2	1000	14	17	11	15	0.330203	0.464687	0.239559
Aox1	1000	29	43	20	46	0.165877	0.551163	-0.0420709
Aox3	1000	42	30	36	41	0.62949	0.289822	0.580438
Aox4	1000	26	29	21	38	0.225645	0.320103	0.147602
Aox3l1	1000	24	31	17	37	0.176465	0.404108	0.00245908
Bzw1	1000	46	55	13	8	1.61838	1.81203	0.560531
Nif3l1	1000	32	26	17	39	0.397388	0.199606	-0.0371023
Ndufb3	1000	123	89	56	53	1.66669	1.25618	0.838261
Cflar	1000	47	30	20	41	0.748789	0.289822	0.0499231
Casp8	1000	42	37	15	59	0.305642	0.169549	-0.472689
Stradb	1000	154	92	49	50	2.00991	1.34972	0.74078
Cdk15	1000	43	32	19	52	0.447765	0.144316	-0.185881
Fzd7	1000	220	139	77	56	2.37948	1.76703	1.1591
Gm973	1000	62	40	35	54	0.815977	0.332081	0.324448
Nop58	1000	77	75	55	89	0.569865	0.531686	0.323028
Snord70	1000	27	15	21	60	-0.1421	-0.620236	-0.232708
Snord11	1000	16	16	31	63	-0.615401	-0.621567	0.0675446
Bmpr2	1000	62	52	23	29	1.32187	1.11947	0.413545
Fam117b	1000	173	127	59	55	2.07585	1.66759	0.864711
Carf	1000	182	134	85	74	1.85353	1.44651	1.0176
Nbeal1	1000	211	167	58	59	2.27421	1.95733	0.782568
Cyp20a1	1000	98	116	56	48	1.46969	1.6756	0.922714
Abi2	1000	153	128	55	57	1.88114	1.64422	0.753909
Cd28	1000	27	21	18	45	0.119266	-0.103001	-0.106598
Ctla4	1000	20	12	21	50	-0.229558	-0.597813	-0.0721346
Icos	1000	14	16	19	38	-0.259782	-0.171751	0.0674317
Pard3b	1000	67	71	30	33	1.31768	1.38082	0.564161
Nrp2	1000	91	78	36	53	1.28921	1.09652	0.368776
Eef1b2	1000	145	104	85	60	1.76255	1.33246	1.21605
Snora41	1000	9	29	18	45	-0.663142	0.179399	-0.106598
Zdbf2	1000	71	42	28	65	0.797016	0.205824	-0.0567769
Adam23	1000	40	50	25	29	0.843821	1.0764	0.485695
Fastkd2	1000	106	70	69	76	1.12757	0.616563	0.742536
Gm13749	1000	27	37	19	51	0.00897609	0.304904	-0.169191
Creb1	1000	179	135	68	45	2.30033	1.92595	1.19826
Ccnyl1	1000	149	136	49	23	2.55607	2.43374	1.29267
Pikfyve	1000	146	112	79	69	1.63474	1.28854	0.99703
Pth2r	1000	38	24	22	59	0.202549	-0.236444	-0.178957
Crygf	1000	14	16	13	25	0.0437175	0.132702	0.0793249
Mtap2	1000	46	68	23	32	0.919724	1.35316	0.347394
Unc80	1000	62	58	20	41	1.05691	0.975714	0.0499231
Rpe	1000	88	78	38	50	1.30096	1.14942	0.4733
Cps1	1000	24	19	19	55	-0.164465	-0.362998	-0.234825
Spag16	1000	42	32	11	29	0.894447	0.616966	-0.11697
Vwc2l	1000	37	32	29	38	0.561248	0.413212	0.430002
Atic	1000	90	52	36	48	1.36472	0.718669	0.453228
Gm8883	1000	13	22	17	42	-0.390541	-0.00589709	-0.0944819
Tmem169	1000	107	71	39	44	1.65475	1.14977	0.605461
Xrcc5	1000	128	73	53	79	1.32668	0.625891	0.403174
Smarcal1	1000	149	108	89	63	1.75092	1.33263	1.2272
Rpl37a	1000	72	57	33	23	1.64918	1.37564	0.885014
Igfbp2	1000	99	55	25	45	1.53849	0.837293	0.163492
Rufy4	1000	90	64	40	32	1.69345	1.28277	0.869347
Cxcr2	1000	24	36	15	39	0.134354	0.507729	-0.1273
Arpc2	1000	94	119	47	52	1.34648	1.63617	0.662116
Gpbar1	1000	24	29	9	15	0.745241	0.912146	0.128528
Pnkd	1000	255	164	94	32	3.04768	2.45269	1.84335
Gm216	1000	57	70	31	55	0.703431	0.933984	0.190481
Slc11a1	1000	30	32	18	43	0.255283	0.311329	-0.0700435
Ctdsp1	1000	155	99	52	56	1.91469	1.3364	0.707403
Mir26b	1000	24	37	15	20	0.594898	0.997264	0.301205
Vil1	1000	29	29	4	21	0.736547	0.732813	-0.357088
Rqcd1	1000	199	162	77	43	2.47991	2.2021	1.38165
Plcd4	1000	44	39	21	53	0.454636	0.323296	-0.122211
Bcs1l	1000	228	182	76	51	2.51345	2.20634	1.22509
Stk36	1000	93	92	56	66	1.10723	1.08768	0.639352
Ttll4	1000	97	89	66	56	1.31701	1.20516	0.977492
Cyp27a1	1000	37	38	18	37	0.582457	0.604406	0.0455278
Wnt6	1000	31	43	16	19	0.8564	1.18094	0.37351
Wnt10a	1000	23	24	15	19	0.587214	0.620224	0.327706
Cdk5r2	1000	102	93	45	36	1.75871	1.63929	0.908997
Fam134a	1000	104	99	50	47	1.56218	1.49523	0.814683
Zfand2b	1000	82	94	42	47	1.27	1.4311	0.62827
Ankzf1	1000	186	148	84	42	2.40969	2.10373	1.50498
Stk16	1000	83	73	40	53	1.1771	1.01767	0.475691
Dnajb2	1000	52	44	42	52	0.652585	0.466244	0.542817
Des	1000	28	22	12	20	0.732402	0.517271	0.154363
Speg	1000	45	35	9	29	0.967204	0.704429	-0.228001
Gmppa	1000	97	55	28	37	1.67472	0.999266	0.417497
Accn4	1000	49	58	17	38	0.855696	1.0377	-0.0174572
Tmem198	1000	145	143	71	30	2.34335	2.32077	1.5487
Inha	1000	73	61	22	22	1.6927	1.47991	0.543349
Stk11ip	1000	131	101	34	72	1.45172	1.11598	0.0299793
Slc4a3	1000	55	42	26	24	1.31279	1.017	0.637934
Sgpp2	1000	45	22	19	45	0.623739	-0.0645268	-0.0647774
Mogat1	1000	16	27	14	52	-0.434878	-0.0143818	-0.408274
Utp14b	1000	164	138	49	35	2.38977	2.15981	1.02111
Acsl3	1000	164	138	49	35	2.38977	2.15981	1.02111
Kcne4	1000	13	16	9	32	-0.176491	-0.0391599	-0.294152
Mrpl44	1000	68	64	37	62	0.792425	0.715902	0.255682
9430031J16Rik	1000	56	42	33	50	0.770442	0.452813	0.333122
Rhbdd1	1000	112	114	53	69	1.29489	1.31091	0.535699
Col4a3	1000	28	34	8	23	0.649184	0.829672	-0.144733
Mff	1000	95	75	50	67	1.11859	0.825684	0.499599
Agfg1	1000	96	79	45	52	1.37248	1.12921	0.615573
Ccl20	1000	16	17	12	20	0.27297	0.313737	0.154363
Wdr69	1000	39	30	24	31	0.770148	0.507735	0.405635
Fbxo36	1000	136	112	47	55	1.76153	1.50772	0.613172
Gm7609	1000	0	5	2	0	0	0.392317	0.169925
Sp140	1000	13	12	6	5	0.639129	0.587213	0.266472
Sp100	1000	0	0	1	0	0	0	0.0874628
Cab39	1000	47	75	19	43	0.709001	1.23416	-0.0282233
Itm2c	1000	75	64	26	40	1.29962	1.10856	0.29144
4933407L21Rik	1000	51	43	37	50	0.666607	0.477475	0.446332
Spata3	1000	20	30	23	32	0.135453	0.484402	0.347394
2810459M11Rik	1000	42	32	24	73	0.0960228	-0.18345	-0.305377
Psmd1	1000	121	115	62	67	1.42221	1.35131	0.740607
Armc9	1000	144	107	52	48	1.95873	1.57372	0.840251
B3gnt7	1000	74	37	22	42	1.24333	0.474096	0.109052
C130036L24Rik	1000	227	180	101	23	3.11457	2.80053	2.14067
1700019O17Rik	1000	47	44	15	32	0.942807	0.867731	0.0161883
Ptma	1000	250	194	66	18	3.38652	3.04209	1.75806
Cops7b	1000	77	44	36	44	1.25139	0.613716	0.524541
Dis3l2	1000	108	78	33	46	1.62822	1.22311	0.402714
Akp3	1000	21	32	18	34	0.129555	0.500238	0.106982
Chrnd	1000	20	24	8	36	0.0459873	0.193035	-0.436777
Chrng	1000	34	25	10	21	0.888551	0.598512	0.0214241
Eif4e2	1000	111	92	56	49	1.60723	1.36779	0.905423
Efhd1	1000	33	34	18	42	0.366188	0.390032	-0.0514131
Gigyf2	1000	118	100	63	33	2.00872	1.79586	1.34438
3110079O15Rik	1000	18	18	9	20	0.360433	0.356806	-0.00913562
Neu2	1000	10	26	26	25	-0.162733	0.52502	0.613661
Inpp5d	1000	26	30	9	32	0.357845	0.484402	-0.294152
Atg16l1	1000	152	84	62	50	1.99283	1.23869	1.00381
Scarna6	1000	30	19	17	31	0.51235	0.113457	0.128101
Sag	1000	32	33	21	30	0.597393	0.6226	0.315207
Dgkd	1000	66	64	28	51	0.940263	0.898912	0.160958
Ugt1a10	1000	15	18	19	54	-0.515229	-0.387811	-0.218694
Ugt1a9	1000	21	19	7	25	0.34628	0.261985	-0.255094
Ugt1a7c	1000	5	15	10	16	-0.215718	0.343009	0.156508
Ugt1a6b	1000	17	23	18	31	0.0331825	0.269576	0.17117
Ugt1a6a	1000	13	20	19	27	-0.0562449	0.2514	0.303274
Ugt1a5	1000	8	19	20	37	-0.560501	-0.0211982	0.12799
Ugt1a2	1000	26	34	17	17	0.753601	1.00186	0.472415
Ugt1a1	1000	17	36	26	42	-0.204128	0.446615	0.253441
Heatr7b1	1000	52	54	48	57	0.56772	0.603578	0.604162
Trpm8	1000	24	14	23	63	-0.293473	-0.714677	-0.201642
Spp2	1000	56	37	26	60	0.60156	0.153488	-0.0498442
Sh3bp4	1000	216	184	82	42	2.60946	2.39003	1.47583
Agap1	1000	115	86	30	28	2.09433	1.72895	0.674447
Cxcr7	1000	84	83	40	58	1.10772	1.08723	0.39591
Cops8	1000	110	96	71	54	1.50785	1.33208	1.09497
Mlph	1000	17	38	14	26	0.155469	0.861749	0.104364
Prlh	1000	13	26	14	21	0.102675	0.633278	0.227875
Lrrfip1	1000	54	48	32	27	1.21506	1.08147	0.758953
Rbm44	1000	10	14	4	16	0.0924043	0.295704	-0.222004
Ramp1	1000	37	42	21	34	0.648022	0.773257	0.228972
Ube2f	1000	205	149	76	50	2.38842	1.96115	1.24197
Scly	1000	73	77	37	58	0.939601	0.997028	0.316476
Espnl	1000	42	33	10	28	0.918891	0.671237	-0.148676
Klhl30	1000	20	44	17	27	0.255699	0.988365	0.218385
Fam132b	1000	48	35	16	35	0.897914	0.565447	-0.00125813
Traf3ip1	1000	76	72	22	31	1.51235	1.44361	0.331635
Asb1	1000	145	170	47	42	2.0824	2.28533	0.838404
Twist2	1000	50	47	8	23	1.23415	1.1631	-0.144733
Olfr1413	1000	32	44	13	37	0.439499	0.756409	-0.183954
Olfr1412	1000	18	26	24	24	0.25051	0.551332	0.567544
Olfr1411	1000	35	28	17	24	0.835472	0.618446	0.29001
Olfr1410	1000	28	28	17	20	0.732402	0.728775	0.391402
Olfr12	1000	26	40	10	17	0.753601	1.16536	0.12846
Gpc1	1000	83	74	22	25	1.76618	1.62456	0.469271
Mir149	1000	30	29	17	17	0.884845	0.849859	0.472415
Dusp28	1000	77	68	31	43	1.27088	1.11868	0.397083
Rnpepl1	1000	46	53	21	18	1.28544	1.43637	0.609961
Capn10	1000	118	105	49	59	1.51375	1.36049	0.595483
Gpr35	1000	29	32	8	20	0.764823	0.854306	-0.0680293
Aqp12	1000	20	51	12	20	0.442895	1.33543	0.154363
Agxt	1000	17	32	8	44	-0.243374	0.291788	-0.590937
Sned1	1000	110	67	25	38	1.81061	1.20329	0.295701
Ppp1r7	1000	177	140	82	40	2.38428	2.07203	1.51383
Ano7	1000	23	29	12	26	0.396477	0.598714	0.00482803
2015-09-02	1000	269	232	94	48	2.79162	2.5854	1.53415
Farp2	1000	128	93	35	38	2.00325	1.59643	0.610574
Bok	1000	48	35	22	51	0.582711	0.249409	-0.0505463
Atg4b	1000	116	114	50	24	2.20744	2.18138	1.29001
Ing5	1000	145	105	61	54	1.86149	1.44359	0.91881
D2hgdh	1000	82	65	33	79	0.77147	0.490008	-0.0906406
Gal3st2	1000	0	0	0	0	0	0	0
Gm6086	1000	13	10	7	7	0.560109	0.400857	0.260108
Neu4	1000	26	33	17	30	0.404748	0.6226	0.150148
Fam174a	1000	79	93	52	64	0.93911	1.13124	0.585763
Gin1	1000	104	83	54	23	2.09664	1.81517	1.39959
Slco6d1	1000	13	13	18	45	-0.449018	-0.454473	-0.106598
Cntnap5b	1000	56	39	25	22	1.38689	0.994484	0.652974
Cdh20	1000	36	42	36	46	0.374464	0.526501	0.488444
2310035C23Rik	1000	189	142	83	50	2.28	1.89861	1.34777
Tnfrsf11a	1000	27	31	12	37	0.280802	0.404108	-0.23458
Zcchc2	1000	157	112	57	39	2.24705	1.80729	1.10833
Phlpp1	1000	236	204	110	55	2.49089	2.28908	1.61317
Serpinb5	1000	19	23	28	48	-0.233914	-0.0833919	0.21222
Serpinb12	1000	6	19	17	45	-0.847567	-0.183171	-0.149666
Serpinb13	1000	27	15	18	34	0.346366	-0.130528	0.106982
Serpinb11	1000	11	13	15	26	-0.134038	-0.0351579	0.151669
Serpinb7	1000	16	10	19	43	-0.268279	-0.573194	-0.0282233
Serpinb2	1000	13	13	9	49	-0.523473	-0.529114	-0.620646
Serpinb10-ps	1000	24	12	23	47	-0.0227785	-0.542903	0.0556911
Serpinb8	1000	18	28	15	55	-0.398931	-0.0328492	-0.409911
Cdh7	1000	44	42	21	29	0.943357	0.889985	0.337596
Cntnap5a	1000	54	32	24	31	1.11807	0.569136	0.405635
Mki67ip	1000	108	85	62	58	1.41806	1.11608	0.873957
Clasp1	1000	125	102	76	54	1.67013	1.40737	1.17558
Tcfcp2l1	1000	50	39	25	41	0.815904	0.54762	0.23755
Tmem185b	1000	78	81	23	30	1.56702	1.6078	0.391156
Sctr	1000	37	26	12	43	0.459642	0.118684	-0.350151
3110009E18Rik	1000	177	125	75	42	2.34394	1.88573	1.36892
C1ql2	1000	28	36	20	42	0.21091	0.446615	0.031049
En1	1000	40	55	51	37	0.661892	0.999266	1.02415
Ccdc93	1000	104	44	42	64	1.27615	0.269948	0.356281
Slc35f5	1000	171	145	83	41	2.3184	2.09718	1.50935
Gpr39	1000	40	37	22	29	0.843821	0.759924	0.37607
Mgat5	1000	112	71	51	48	1.6368	1.07415	0.818878
Acmsd	1000	18	15	18	26	0.198538	0.0610575	0.284936
Ccnt2	1000	197	171	81	56	2.23155	2.0378	1.21985
Rab3gap1	1000	69	48	32	41	1.1809	0.76626	0.464961
R3hdm1	1000	290	191	148	58	2.72126	2.15136	1.94611
Mir128-1	1000	15	10	11	51	-0.463092	-0.722576	-0.543586
Ubxn4	1000	148	108	52	63	1.74215	1.33263	0.600419
Thsd7b	1000	26	36	17	27	0.478092	0.781914	0.218385
Yod1	1000	96	81	32	35	1.70527	1.49293	0.583704
AA986860	1000	30	21	16	29	0.560028	0.241457	0.128143
Fcamr	1000	20	39	21	31	0.158713	0.765533	0.29316
Pigr	1000	30	19	20	26	0.634637	0.236144	0.367398
Faim3	1000	17	19	22	18	0.375635	0.457125	0.648435
Il10	1000	40	43	25	45	0.500356	0.570189	0.163492
Lgtn	1000	72	63	44	57	0.939689	0.778076	0.511053
Fam72a	1000	356	307	188	71	2.80535	2.59518	2.0721
Avpr1b	1000	26	42	25	27	0.478092	0.939456	0.531543
Ctse	1000	15	23	20	40	-0.253981	0.0720311	0.0690474
5430435G22Rik	1000	25	21	18	28	0.418462	0.265981	0.238348
Slc26a9	1000	22	37	14	20	0.520898	0.997264	0.253899
Pm20d1	1000	30	27	20	35	0.421476	0.319287	0.168667
Slc41a1	1000	106	105	49	43	1.66246	1.64523	0.864862
Rab7l1	1000	93	42	43	79	0.924944	0.008139	0.177293
Nucks1	1000	159	139	75	67	1.77539	1.59401	0.963
Slc45a3	1000	46	36	13	29	0.990663	0.732444	-0.0138762
Elk4	1000	66	57	39	52	0.922674	0.749178	0.466195
Lemd1	1000	91	79	32	36	1.61753	1.44096	0.563223
Mir135b	1000	41	31	17	31	0.821678	0.538762	0.128101
Klhdc8a	1000	65	49	24	54	0.870425	0.547094	-0.0260489
Nuak2	1000	103	88	41	73	1.13286	0.932027	0.205585
Dstyk	1000	144	99	40	81	1.45258	0.969495	0.0769002
Rbbp5	1000	128	100	90	66	1.50897	1.19077	1.19735
Tmem81	1000	15	19	27	63	-0.661205	-0.492284	-0.0607795
Lrrn2	1000	50	49	22	48	0.681197	0.653574	0.000716015
Pik3c2b	1000	82	76	35	41	1.38622	1.28982	0.552423
Ppp1r15b	1000	188	153	79	72	1.92447	1.6465	0.955979
Plekha6	1000	56	65	28	48	0.806728	0.971056	0.21222
Golt1a	1000	28	31	20	21	0.704126	0.795549	0.490909
Kiss1	1000	24	31	8	26	0.433003	0.66145	-0.217564
Ren2	1000	33	34	17	28	0.675619	0.700383	0.195279
Ren1	1000	40	36	18	30	0.819785	0.70833	0.193217
Etnk2	1000	90	108	43	57	1.20818	1.42849	0.486805
Fmod	1000	30	47	23	36	0.399624	0.848386	0.263662
Chit1	1000	28	24	19	46	0.133456	-0.00955163	-0.0827129
Chi3l1	1000	40	36	19	29	0.843821	0.732444	0.257426
Mybph	1000	20	38	10	27	0.255699	0.836362	-0.125569
Myog	1000	22	25	9	23	0.43768	0.543368	-0.0858397
4933406M09Rik	1000	29	22	15	27	0.577627	0.329402	0.128187
Cyb5r1	1000	57	54	15	27	1.2756	1.21076	0.128187
Adipor1	1000	140	109	38	48	1.9222	1.59699	0.507676
Klhl12	1000	84	85	42	57	1.12411	1.13251	0.462143
Rabif	1000	116	97	62	76	1.24122	1.01048	0.618547
Kdm5b	1000	75	50	36	70	0.788262	0.318487	0.1138
Syt2	1000	44	46	25	28	0.9678	1.01072	0.508437
Ube2t	1000	115	104	43	36	1.90949	1.778	0.860903
Ptpn7	1000	27	27	16	22	0.643227	0.639389	0.295422
Arl8a	1000	46	74	26	48	0.590999	1.12306	0.145106
Lmod1	1000	39	51	13	34	0.701461	0.981365	-0.1225
Csrp1	1000	99	66	26	29	1.88196	1.38956	0.52046
Phlda3	1000	46	63	25	35	0.85211	1.1968	0.356294
Tnni1	1000	28	38	19	35	0.357346	0.64791	0.128025
Lad1	1000	46	37	26	28	1.01511	0.784448	0.543202
Tnnt2	1000	28	28	21	35	0.357346	0.352454	0.208195
Tmem9	1000	55	62	22	59	0.597408	0.72703	-0.178957
Cacna1s	1000	31	24	18	37	0.409126	0.171447	0.0455278
Kif21b	1000	99	91	40	50	1.44601	1.3363	0.525767
Ddx59	1000	103	89	36	47	1.55011	1.36399	0.470729
Kif14	1000	23	34	25	50	-0.11408	0.238689	0.075964
Zfp281	1000	155	149	66	65	1.77192	1.71417	0.841343
Mir181a-1	1000	31	15	31	62	-0.0453032	-0.65183	0.0823509
Mir181b-1	1000	34	17	36	59	0.0915174	-0.513978	0.273555
Atp6v1g3	1000	22	26	22	37	0.102464	0.241836	0.205992
Dennd1b	1000	50	46	20	30	1.05682	0.962087	0.275679
Zbtb41	1000	97	102	35	49	1.43872	1.49555	0.407923
Aspm	1000	129	89	49	64	1.54916	1.0773	0.520668
F13b	1000	15	14	8	51	-0.463092	-0.516126	-0.713511
Kcnt2	1000	94	74	32	34	1.70146	1.40713	0.604481
B3galt2	1000	32	28	31	83	-0.310028	-0.44225	-0.200541
Glrx2	1000	42	34	43	58	0.321848	0.101725	0.471198
Uchl5	1000	181	147	69	25	2.75888	2.48143	1.63073
Fam5c	1000	13	28	17	52	-0.576897	0.0187851	-0.27077
Ptgs2	1000	49	41	23	63	0.406967	0.211323	-0.201642
Pdc	1000	9	16	14	70	-1.07568	-0.725907	-0.679749
Tpr	1000	93	105	61	75	0.97862	1.12279	0.612994
Ivns1abp	1000	138	88	65	42	2.01826	1.44662	1.20097
1190005F20Rik	1000	240	169	89	46	2.67402	2.1999	1.50225
Fam129a	1000	20	35	14	27	0.255699	0.7539	0.0808815
Edem3	1000	208	161	90	44	2.51959	2.17443	1.55202
Glt25d2	1000	20	15	22	38	0.0032527	-0.217554	0.186076
Apobec4	1000	33	22	21	58	0.078577	-0.294203	-0.201992
Arpc5	1000	139	152	54	23	2.46588	2.57813	1.39959
Ncf2	1000	21	21	22	35	0.107367	0.102475	0.246669
Nmnat2	1000	40	48	32	67	0.131533	0.317889	0.0401676
1700012A16Rik	1000	75	64	18	36	1.38386	1.19303	0.0657229
Rgs8	1000	48	62	21	32	0.965528	1.24624	0.271445
Rgs16	1000	83	59	22	44	1.34159	0.935644	0.0720284
Rnasel	1000	88	54	38	49	1.31899	0.742188	0.490385
Gm5531	1000	16	27	20	44	-0.287768	0.13309	-0.00597412
Teddm1	1000	30	30	14	42	0.27504	0.269737	-0.231985
Glul	1000	200	164	71	46	2.42891	2.16037	1.23095
Stx6	1000	163	111	69	56	1.98065	1.4796	1.02933
Acbd6	1000	79	63	41	53	1.1176	0.845717	0.501226
Tor1aip2	1000	57	43	24	53	0.73757	0.424579	-0.00973584
Nphs2	1000	25	40	13	35	0.255466	0.700377	-0.143277
Abl2	1000	75	70	26	42	1.25927	1.17244	0.253441
Angptl1	1000	93	43	26	49	1.38673	0.495548	0.127815
2810025M15Rik	1000	60	73	21	35	1.14584	1.36876	0.208195
BC026585	1000	56	47	16	46	0.843949	0.6458	-0.211996
Sec16b	1000	20	26	15	51	-0.247364	-0.0306987	-0.344278
Astn1	1000	27	29	24	34	0.346366	0.407129	0.341447
Mir488	1000	26	26	26	50	-0.00716519	-0.0128502	0.110729
Rfwd2	1000	92	108	53	47	1.41018	1.60394	0.878813
Scarna3a	1000	15	8	12	66	-0.706756	-1.08225	-0.723218
Tnr	1000	42	37	41	58	0.321848	0.18579	0.421445
4930523C07Rik	1000	25	29	22	27	0.443326	0.573328	0.421918
Mrps14	1000	181	141	85	38	2.45538	2.12287	1.59636
Rc3h1	1000	121	84	37	36	1.97409	1.51496	0.706181
Serpinc1	1000	15	22	11	33	-0.103168	0.185806	-0.204513
Gas5	1000	173	160	55	43	2.29396	2.1858	0.992241
Snord47	1000	16	9	21	54	-0.469425	-0.831418	-0.138524
Cenpl	1000	164	138	72	64	1.86111	1.62984	0.957732
Ankrd45	1000	36	29	11	44	0.412671	0.198679	-0.421012
Tnfsf4	1000	18	17	14	46	-0.238513	-0.287086	-0.305105
Tnfsf18	1000	35	27	29	51	0.255137	0.00324862	0.193379
Pigc	1000	139	102	58	58	1.73999	1.34051	0.798008
Dnm3os	1000	44	20	26	44	0.619122	-0.12325	0.216418
Mir199a-2	1000	40	22	20	41	0.578864	0.0141878	0.0499231
Mir214	1000	14	16	19	61	-0.677324	-0.590316	-0.327995
Vamp4	1000	192	148	57	44	2.41267	2.06438	1.01393
Myoc	1000	17	17	12	38	-0.122278	-0.127356	-0.254496
Kifap3	1000	179	149	80	67	1.93151	1.68421	1.04017
Scyl3	1000	76	89	35	37	1.3781	1.56376	0.63049
2810422O20Rik	1000	131	92	53	59	1.64733	1.19652	0.681639
Sele	1000	8	30	12	49	-0.796492	0.136466	-0.457147
Sell	1000	22	23	17	33	0.190563	0.22328	0.0849932
Selp	1000	31	21	23	43	0.28631	-0.0641804	0.127896
F5	1000	33	34	19	22	0.831672	0.856981	0.424705
Slc19a2	1000	161	131	53	36	2.34367	2.07078	1.08678
4930455F23Rik	1000	75	78	46	75	0.71823	0.758519	0.300404
Nme7	1000	165	167	102	51	2.08256	2.09268	1.58417
Dpt	1000	12	34	12	39	-0.380219	0.451145	-0.274142
Gpr161	1000	22	15	11	35	0.145841	-0.152782	-0.246371
Brp44	1000	317	222	137	52	2.9445	2.45417	1.94222
Adcy10	1000	14	20	22	48	-0.456307	-0.198869	0.000716015
Creg1	1000	117	48	34	67	1.37946	0.317889	0.0990613
Cd247	1000	28	27	9	57	-0.0603112	-0.09944	-0.751982
Gpa33	1000	33	28	17	40	0.406532	0.24606	-0.0564835
Ildr2	1000	67	38	13	49	0.993585	0.367792	-0.406521
Tada1	1000	110	70	49	66	1.31633	0.759053	0.491795
Fam78b	1000	45	45	15	14	1.38609	1.38321	0.46805
Tmco1	1000	129	106	60	24	2.34296	2.08975	1.49354
Aldh9a1	1000	103	61	34	17	2.2561	1.62479	1.07188
Rxrg	1000	78	64	37	51	1.1373	0.898912	0.429447
Lmx1a	1000	54	36	13	27	1.21506	0.781914	0.0319719
Rgs5	1000	32	34	15	37	0.439499	0.493375	-0.0877387
1700084C01Rik	1000	20	30	30	30	0.182355	0.531452	0.629316
Sh2d1b2	1000	11	17	6	19	0.0566989	0.34269	-0.167058
Sh2d1b1	1000	9	11	7	13	0.131985	0.240279	0.0672009
1700015E13Rik	1000	13	21	20	43	-0.410298	-0.0641804	0.0124187
Olfml2b	1000	108	55	25	44	1.66643	0.856573	0.181653
Fcgr4	1000	21	22	18	27	0.295228	0.329402	0.261454
1700009P17Rik	1000	39	29	15	46	0.455384	0.160373	-0.2578
Mpz	1000	121	92	43	58	1.5619	1.21276	0.471198
Nr1i3	1000	16	15	11	39	-0.187574	-0.238515	-0.326609
Apoa2	1000	20	21	23	28	0.230835	0.265981	0.436287
Adamts4	1000	41	37	21	44	0.545122	0.434746	0.0335542
B4galt3	1000	58	76	27	63	0.594052	0.901995	-0.0607795
Dedd	1000	154	105	64	54	1.93997	1.44359	0.973951
Pfdn2	1000	68	63	42	65	0.74639	0.651624	0.341772
Pvrl4	1000	29	45	10	32	0.457381	0.891577	-0.237568
Arhgap30	1000	37	29	10	31	0.716709	0.476027	-0.215853
Usf1	1000	112	108	65	37	1.85454	1.80372	1.29791
Tstd1	1000	15	26	10	21	0.198891	0.633278	0.0214241
F11r	1000	70	45	33	46	1.10029	0.599258	0.402714
Refbp2	1000	120	136	69	69	1.38235	1.53647	0.836565
Cd244	1000	49	69	30	66	0.361416	0.74218	-0.00701057
Cd48	1000	24	31	32	31	0.310716	0.538762	0.668669
Slamf1	1000	23	17	19	35	0.183316	-0.0625838	0.128025
Cd84	1000	14	17	22	48	-0.456307	-0.3244	0.000716015
Slamf6	1000	28	19	17	20	0.732402	0.398626	0.391402
Copa	1000	84	51	41	75	0.854292	0.27002	0.179098
Pex19	1000	71	93	42	53	0.990689	1.31012	0.526317
Dcaf8	1000	117	105	51	59	1.50294	1.36049	0.639204
Igsf8	1000	94	85	39	23	1.97111	1.84403	1.05166
Kcnj10	1000	46	46	19	38	0.787524	0.782446	0.0674317
Pigm	1000	193	141	76	41	2.47887	2.06088	1.40356
Slamf9	1000	33	39	21	36	0.490772	0.652466	0.187713
Igsf9	1000	125	136	51	24	2.3026	2.40694	1.31171
Tagln2	1000	55	42	23	40	0.94157	0.64461	0.184525
Ccdc19	1000	70	68	21	69	0.721156	0.680862	-0.363373
Vsig8	1000	18	25	14	24	0.25051	0.516567	0.152507
Crp	1000	32	29	20	55	0.0985691	-0.000427753	-0.194183
Olfr16	1000	22	15	20	61	-0.336287	-0.636119	-0.287353
Olfr218	1000	11	10	17	71	-0.978926	-1.03978	-0.555928
Olfr1404	1000	12	15	23	24	-0.029598	0.113211	0.531019
Olfr418-ps1	1000	14	17	19	37	-0.238573	-0.106087	0.087348
Aim2	1000	19	23	20	44	-0.158485	-0.00777237	-0.00597412
Pyhin1	1000	8	9	6	15	0.00827507	0.0641492	-0.0558966
Pydc3	1000	7	7	5	16	-0.0844735	-0.0876249	-0.151614
Olfr433	1000	13	15	11	31	-0.153231	-0.0616302	-0.161406
Olfr432	1000	8	20	10	28	-0.354128	0.226452	-0.148676
Olfr430	1000	16	12	14	46	-0.325976	-0.524125	-0.305105
Olfr429	1000	15	20	13	45	-0.352802	-0.142529	-0.336079
Olfr427	1000	21	9	13	30	0.221884	-0.348253	-0.0362652
Olfr424	1000	10	14	15	46	-0.625536	-0.424589	-0.2578
Olfr421	1000	13	16	11	53	-0.594274	-0.458064	-0.576776
Olfr420	1000	10	16	20	54	-0.768985	-0.475274	-0.178052
Spna1	1000	18	22	26	41	-0.141028	0.0141878	0.272316
1810030J14Rik	1000	12	7	15	38	-0.359317	-0.648189	-0.107655
Olfr417	1000	16	17	17	44	-0.287768	-0.24878	-0.131505
Olfr248	1000	13	15	17	57	-0.661762	-0.571508	-0.351444
Olfr414	1000	31	24	18	45	0.24759	0.00947381	-0.106598
Olfr220	1000	14	20	12	69	-0.798219	-0.54153	-0.765471
Fmn2	1000	104	68	49	50	1.50741	0.98715	0.74078
Kmo	1000	22	21	32	61	-0.336287	-0.380862	0.127684
Wdr64	1000	22	19	18	39	0.0603534	-0.0634279	0.00596639
Exo1	1000	76	49	43	60	0.955197	0.447936	0.440481
Sdccag8	1000	301	220	95	55	2.82195	2.39036	1.43031
Zfp238	1000	64	42	32	52	0.88705	0.417334	0.269798
1700016C15Rik	1000	22	33	21	42	-0.000594228	0.360885	0.0705774
Gm16432	1000	4	7	10	21	-0.433378	-0.235478	0.0214241
Pppde1	1000	120	91	58	40	1.87929	1.5281	1.10858
Fam36a	1000	153	139	71	36	2.27694	2.14723	1.4212
Efcab2	1000	66	63	24	52	0.922674	0.863134	0.00676378
Kif26b	1000	55	50	24	20	1.42272	1.31374	0.668936
Cnst	1000	174	137	56	25	2.70668	2.39009	1.39127
Sccpdh	1000	83	58	31	37	1.48389	1.05897	0.512654
Cdc42bpa	1000	37	41	14	77	-0.0887313	0.00968375	-0.772911
Itpkb	1000	55	25	16	55	0.663354	-0.134729	-0.364108
Parp1	1000	148	118	63	54	1.88813	1.59082	0.955804
Lin9	1000	89	85	17	16	2.10621	2.04702	0.500462
Acbd3	1000	123	83	42	37	1.97348	1.47888	0.816046
BC031781	1000	290	206	90	37	3.11192	2.64393	1.68599
Lefty2	1000	34	42	14	31	0.632645	0.842154	-0.00940241
Pycr2	1000	170	134	58	53	2.0869	1.77075	0.877789
Lefty1	1000	28	42	12	33	0.402067	0.795859	-0.152046
Tmem63a	1000	54	44	18	28	1.19019	0.963418	0.238348
9130409I23Rik	1000	19	37	13	36	0.00534533	0.599027	-0.163759
Cnih4	1000	102	53	42	60	1.31428	0.534092	0.415819
Cnih3	1000	52	45	19	48	0.724266	0.561943	-0.117928
Srp9	1000	90	79	44	64	1.09718	0.932913	0.405191
1700047M11Rik	1000	20	24	13	23	0.359678	0.507744	0.128285
Trp53bp2	1000	196	143	48	24	2.89097	2.4719	1.24562
Capn8	1000	32	29	19	39	0.397388	0.299142	0.0477866
Susd4	1000	63	85	30	37	1.15832	1.50773	0.481627
Tlr5	1000	40	38	15	30	0.819785	0.762778	0.0599501
Dusp10	1000	295	180	102	28	3.34168	2.67124	2.03353
Rab3gap2	1000	97	94	56	45	1.51318	1.46891	0.975865
Snora36b	1000	19	25	25	25	0.26611	0.490254	0.578896
Mir664	1000	21	27	25	27	0.295228	0.507739	0.531543
Mir194-1	1000	20	20	21	38	0.0032527	-0.00182559	0.147602
Mir215	1000	22	23	23	46	-0.0780483	-0.0460775	0.0734063
Bpnt1	1000	103	73	37	42	1.6463	1.22191	0.589044
Eprs	1000	138	117	50	38	2.10011	1.88353	0.982543
Slc30a10	1000	36	42	18	31	0.689228	0.842154	0.17117
5033404E19Rik	1000	16	13	25	63	-0.615401	-0.763586	-0.129492
D1Pas1	1000	27	21	19	19	0.728076	0.50775	0.502793
Gpatch2	1000	59	61	53	57	0.709076	0.741082	0.712687
Esrrg	1000	57	62	40	51	0.772536	0.862386	0.508881
Ush2a	1000	33	21	22	54	0.145285	-0.265821	-0.100049
Ptpn14	1000	110	73	26	23	2.16703	1.66155	0.662622
Angel2	1000	10	11	3	34	-0.379459	-0.329837	-0.732554
A230020J21Rik	1000	45	42	17	53	0.478483	0.399917	-0.28727
1700022P22Rik	1000	16	39	8	40	-0.208177	0.567989	-0.515915
Nsl1	1000	105	80	36	64	1.28812	0.948019	0.19874
Batf3	1000	50	41	17	16	1.43636	1.2217	0.500462
Tmem206	1000	116	121	46	59	1.49206	1.53966	0.527311
Ints7	1000	200	182	82	30	2.76732	2.63725	1.72046
Lpgat1	1000	59	55	31	38	1.06215	0.977997	0.492738
Nek2	1000	138	121	52	55	1.78039	1.60575	0.723355
Slc30a1	1000	98	88	36	18	2.16413	2.02828	1.10095
Rd3	1000	29	47	22	22	0.708815	1.1904	0.543349
Gm10516	1000	109	99	36	41	1.73729	1.61175	0.580438
Kcnh1	1000	78	62	32	39	1.36701	1.09269	0.503466
Irf6	1000	45	42	16	35	0.828651	0.751003	-0.00125813
A130010J15Rik	1000	123	123	51	46	1.79297	1.78746	0.854093
Lamb3	1000	22	38	16	16	0.639892	1.1437	0.456068
Plxna2	1000	101	88	42	42	1.62184	1.44662	0.719105
Cd34	1000	16	10	27	38	-0.166672	-0.471311	0.364413
A330023F24Rik	1000	31	24	14	46	0.228613	-0.00955163	-0.305105
Mir29b-2	1000	11	26	20	51	-0.662401	-0.0306987	-0.128549
Mir29c	1000	16	30	20	35	-0.102086	0.416584	0.168667
Xkr4	1000	51	89	33	27	1.15186	1.79572	0.788701
Rp1	1000	18	14	10	39	-0.100111	-0.28582	-0.381057
Sox17	1000	42	46	13	46	0.532005	0.622717	-0.354015
Mrpl15	1000	79	73	41	44	1.28209	1.18256	0.656991
Rgs20	1000	75	61	32	21	1.75249	1.50775	0.905947
Npbwr1	1000	42	31	20	42	0.609459	0.300764	0.031049
Sntg1	1000	34	33	24	30	0.656287	0.6226	0.427682
2610203C22Rik	1000	34	30	26	46	0.31788	0.192082	0.180322
Mybl1	1000	114	96	19	34	1.94247	1.72263	0.148802
Vcpip1	1000	176	152	65	54	2.11554	1.91704	0.991873
Snhg6	1000	85	73	53	50	1.25873	1.07057	0.826937
Snord87	1000	30	32	22	51	0.106273	0.161946	-0.0505463
Lrrc67	1000	68	48	35	50	0.992835	0.594832	0.390837
Cops5	1000	95	93	43	44	1.50665	1.47501	0.706744
Arfgef1	1000	74	70	21	20	1.76482	1.69561	0.556462
Cpa6	1000	38	31	24	28	0.815797	0.611116	0.472813
Slco5a1	1000	115	64	32	43	1.76514	1.04829	0.427456
Prdm14	1000	28	24	20	29	0.495898	0.353932	0.298068
Ncoa2	1000	87	58	30	34	1.6066	1.12473	0.543081
Tram1	1000	90	71	43	42	1.4794	1.18912	0.743767
Lactb2	1000	97	55	51	50	1.4207	0.74458	0.784501
Gm5523	1000	37	42	22	56	0.224756	0.348891	-0.132132
Eya1	1000	63	48	33	91	0.310546	-8.78417e-05	-0.235104
Msc	1000	50	39	19	41	0.815904	0.54762	0.00928111
Trpa1	1000	58	20	11	29	1.24592	0.201929	-0.11697
Gm106	1000	26	24	14	51	-0.0249712	-0.101088	-0.391583
Rpl7	1000	126	114	75	52	1.71487	1.58172	1.19263
Stau2	1000	67	64	12	15	1.79835	1.74222	0.292027
Ube2w	1000	83	94	42	54	1.15993	1.30609	0.510004
Tceb1	1000	212	177	108	63	2.21749	1.97089	1.46715
Jph1	1000	41	45	14	16	1.22485	1.31955	0.362959
Crisp4	1000	10	15	14	36	-0.423498	-0.174697	-0.114849
Defb44-ps	1000	20	3	16	64	-0.46082	-1.38902	-0.5017
Defb18	1000	21	10	9	52	-0.225424	-0.740207	-0.671308
Defb41	1000	9	14	13	66	-1.0171	-0.760321	-0.672592
Gm15386	1000	9	14	13	66	-1.0171	-0.760321	-0.672592
Pkhd1	1000	11	23	20	46	-0.571088	-0.0460775	-0.0420709
Il17f	1000	21	17	21	49	-0.172001	-0.342701	-0.0550487
Mcm3	1000	164	130	83	47	2.14715	1.83957	1.39965
Tram2	1000	95	76	27	35	1.69233	1.41658	0.425007
Gm4956	1000	25	13	17	51	-0.0597367	-0.565035	-0.25408
Kcnq5	1000	53	26	19	25	1.24535	0.52502	0.350627
Rims1	1000	49	58	17	27	1.10814	1.29093	0.218385
4933415F23Rik	1000	19	26	17	34	0.0493846	0.307593	0.0639128
Ogfrl1	1000	73	91	43	46	1.14976	1.40999	0.670647
Smap1	1000	42	45	19	44	0.570212	0.637563	-0.0466161
1110058L19Rik	1000	107	91	43	78	1.11251	0.904881	0.190011
Fam135a	1000	121	118	55	23	2.28778	2.25191	1.42005
Col19a1	1000	24	22	11	56	-0.181236	-0.261162	-0.625172
Bai3	1000	43	54	28	34	0.802745	1.04456	0.47895
4931408C20Rik	1000	115	151	112	190	0.180492	0.522891	0.313378
Gm597	1000	8	24	18	51	-0.832326	-0.101088	-0.211011
Phf3	1000	22	9	22	54	-0.221498	-0.831418	-0.100049
Ptp4a1	1000	126	97	55	46	1.82377	1.4887	0.937751
Gm13363	1000	126	100	54	39	1.96217	1.66527	1.04779
4931428L18Rik	1000	20	17	27	36	0.0459873	-0.0844994	0.404525
Gm9839	1000	7	6	2	11	0.0795572	0.0129988	-0.224956
Gm5415	1000	1	2	3	9	-0.285325	-0.20495	-0.0827359
Prim2	1000	106	97	49	46	1.60476	1.4887	0.810372
Bag2	1000	45	39	18	43	0.662459	0.507726	-0.0700435
Zfp451	1000	109	85	42	45	1.65879	1.34576	0.663921
Gm15455	1000	5	13	2	8	0.0565013	0.520261	-0.127525
Bend6	1000	73	66	22	22	1.6927	1.57068	0.543349
Ccdc115	1000	173	126	91	54	2.09282	1.67447	1.39349
Prss40	1000	34	21	13	25	0.780683	0.342156	0.0793249
AA619741	1000	32	28	14	24	0.74801	0.618446	0.152507
Fam168b	1000	99	74	36	58	1.30936	0.949722	0.288995
Uggt1	1000	85	77	30	45	1.35121	1.2267	0.329502
Neurl3	1000	41	34	13	28	0.8938	0.700383	0.0088657
4632411B12Rik	1000	71	65	23	33	1.38558	1.27773	0.326001
Lman2l	1000	152	121	75	58	1.85618	1.5559	1.09635
Ankrd23	1000	34	38	21	14	1.09921	1.20736	0.723307
Ankrd39	1000	185	153	78	47	2.30635	2.05062	1.32488
Sema4c	1000	91	63	19	28	1.80238	1.36031	0.280168
Fam178b	1000	32	30	17	33	0.527598	0.46144	0.0849932
Actr1b	1000	149	123	71	56	1.86316	1.60985	1.06288
Tmem131	1000	88	86	47	34	1.62054	1.5877	0.996799
6330578E17Rik	1000	105	96	35	53	1.46661	1.34929	0.340761
Mgat4a	1000	15	24	20	39	-0.233378	0.129217	0.0884286
4930594C11Rik	1000	15	16	13	26	0.065271	0.106861	0.0554541
2010300C02Rik	1000	41	34	13	24	0.995937	0.802871	0.103597
Tsga10	1000	223	175	108	64	2.27012	1.94049	1.4525
Mitd1	1000	100	77	43	71	1.12417	0.798944	0.28232
Lyg2	1000	21	14	30	48	-0.153744	-0.461903	0.27635
Lyg1	1000	15	13	18	37	-0.191267	-0.2925	0.0455278
Txndc9	1000	186	140	69	37	2.51275	2.13492	1.36746
Rev1	1000	102	111	37	19	2.18445	2.28698	1.10143
Aff3	1000	32	37	21	34	0.505064	0.643196	0.228972
Lonrf2	1000	25	24	19	50	-0.0419306	-0.0832395	-0.152305
Chst10	1000	48	44	21	61	0.415786	0.316575	-0.247825
Tbc1d8	1000	108	78	40	46	1.62822	1.22311	0.595359
Snord89	1000	24	22	15	18	0.653169	0.575769	0.354704
Rnf149	1000	123	88	30	44	1.83117	1.40727	0.347663
Creg2	1000	43	35	23	32	0.848171	0.633265	0.347394
Rfx8	1000	27	31	19	31	0.415053	0.538762	0.21299
Gm3646	1000	22	24	36	49	-0.133527	-0.0651674	0.435938
Mfsd9	1000	68	57	35	58	0.856185	0.647694	0.26098
2610017I09Rik	1000	107	109	40	25	2.07934	2.09849	1.0287
Tgfbrap1	1000	75	119	44	47	1.16309	1.72656	0.677179
Fhl2	1000	62	41	30	43	1.01712	0.559256	0.366056
Uxs1	1000	182	172	78	46	2.30338	2.22311	1.34259
A530098C11Rik	1000	9	10	15	46	-0.68212	-0.63104	-0.2578
1700029F09Rik	1000	140	132	41	44	1.99763	1.91628	0.656991
Kdelc1	1000	190	134	78	41	2.45801	1.99508	1.43459
4832428D23Rik	1000	27	12	19	46	0.100289	-0.524125	-0.0827129
Col5a2	1000	20	14	28	45	-0.137074	-0.405564	0.265371
Slc40a1	1000	82	58	28	42	1.36619	0.955629	0.320556
Gm3852	1000	12	7	18	31	-0.203857	-0.492265	0.17117
Gm4776	1000	7	9	8	29	-0.439972	-0.32414	-0.286895
Slc39a10	1000	213	162	70	33	2.78184	2.41361	1.46686
Obfc2a	1000	175	150	74	75	1.78786	1.57897	0.838061
Myo1b	1000	49	24	20	40	0.81419	0.108557	0.0690474
Gls	1000	177	145	68	45	2.28546	2.01846	1.19826
Nab1	1000	38	31	22	39	0.567313	0.361878	0.166431
Mfsd6	1000	44	58	20	43	0.638612	0.93582	0.0124187
Inpp1	1000	50	40	21	52	0.609516	0.366708	-0.105711
1700019D03Rik	1000	31	32	19	34	0.47469	0.500238	0.148802
1700019A02Rik	1000	24	21	21	35	0.219842	0.102475	0.208195
Pms1	1000	95	128	45	56	1.29125	1.66084	0.550677
Asnsd1	1000	97	72	50	24	1.98323	1.61845	1.29001
Stk17b	1000	84	40	36	25	1.78068	0.940057	0.921784
Hecw2	1000	47	34	19	50	0.577797	0.238689	-0.152305
Gtf3c3	1000	49	44	24	65	0.37644	0.254734	-0.19428
Pgap1	1000	92	107	52	57	1.23514	1.41681	0.691625
Ankrd44	1000	93	59	27	34	1.68829	1.14409	0.445783
Sf3b1	1000	128	107	53	50	1.77044	1.53735	0.826937
Hspd1	1000	205	201	87	27	2.87368	2.84303	1.86049
Rftn2	1000	35	16	15	30	0.684856	0.00789051	0.0599501
Boll	1000	26	31	7	19	0.694129	0.852885	-0.102928
Hsfy2	1000	34	6	17	62	0.0439642	-1.14659	-0.427844
Satb2	1000	61	39	13	20	1.53976	1.0507	0.204989
1110034B05Rik	1000	94	62	37	51	1.36407	0.862386	0.429447
Kctd18	1000	109	99	37	41	1.73729	1.61175	0.607919
Clk1	1000	87	71	39	35	1.58441	1.33597	0.780102
Ppil3	1000	81	65	53	56	1.09675	0.83076	0.728465
Orc2	1000	119	101	56	67	1.40099	1.18825	0.62513
Fam126b	1000	116	79	53	69	1.33928	0.8584	0.535699
Als2cr12	1000	16	15	12	21	0.244694	0.195156	0.128339
Trak2	1000	137	113	49	41	2.0289	1.77749	0.902366
Als2cr11	1000	12	34	18	38	-0.359317	0.472106	0.0256115
Als2cr4	1000	91	97	37	43	1.47319	1.54655	0.570414
Mpp4	1000	30	20	25	34	0.443663	0.0852007	0.377071
Als2	1000	159	114	79	59	1.89887	1.464	1.14297
Sumo1	1000	91	100	51	62	1.14157	1.25195	0.593851
Ica1l	1000	27	34	14	42	0.177743	0.390032	-0.231985
Wdr12	1000	161	123	77	64	1.83686	1.482	1.03746
Raph1	1000	89	84	35	42	1.46572	1.39003	0.533549
Ino80d	1000	96	90	33	42	1.55883	1.4741	0.475834
Ndufs1	1000	158	113	89	43	2.17466	1.73759	1.55674
Gpr1	1000	45	55	35	64	0.299992	0.512804	0.170725
Dytn	1000	18	40	14	30	0.0998933	0.815245	0.0126444
Mdh1b	1000	97	70	62	74	1.04435	0.643957	0.644793
Klf7	1000	176	194	75	24	2.74801	2.87326	1.75341
Fam119a	1000	125	126	58	34	2.05965	2.06502	1.22897
Fzd5	1000	150	91	28	36	2.2511	1.61257	0.437692
Plekhm3	1000	114	75	22	73	1.26041	0.739382	-0.379378
4921521F21Rik	1000	29	16	21	53	0.0395984	-0.458064	-0.122211
Cryge	1000	41	26	11	33	0.775526	0.330195	-0.204513
Crygd	1000	23	17	18	47	-0.0593044	-0.305863	-0.142248
Crygc	1000	49	27	15	35	0.920282	0.319287	-0.0470618
Crygb	1000	28	18	14	26	0.570506	0.194324	0.104364
Cryga	1000	23	23	13	9	0.912614	0.910527	0.527318
D630023F18Rik	1000	37	39	27	48	0.364723	0.412566	0.179053
Idh1	1000	161	137	73	58	1.93147	1.71526	1.06429
1110028C15Rik	1000	92	77	38	30	1.76732	1.54705	0.860641
Acadl	1000	36	29	10	28	0.761349	0.54838	-0.148676
Myl1	1000	20	14	31	29	0.206391	-0.0611054	0.682732
Lancl1	1000	88	65	42	41	1.47195	1.10611	0.737979
Erbb4	1000	48	57	31	50	0.600517	0.784657	0.273001
Ikzf2	1000	31	26	24	55	0.0681955	-0.0999634	-0.0421795
Bard1	1000	158	98	43	46	2.11697	1.50141	0.670647
Abca12	1000	32	23	6	44	0.297194	-0.00777237	-0.716468
Fn1	1000	96	80	25	34	1.72746	1.50024	0.377071
Mreg	1000	51	56	38	54	0.596664	0.694651	0.406911
Pecr	1000	111	74	48	48	1.62549	1.12306	0.752789
2015-03-04	1000	77	72	20	42	1.29064	1.20561	0.031049
Ankar	1000	15	13	18	29	-0.00933726	-0.110015	0.215606
Igfbp5	1000	52	41	32	54	0.618038	0.357616	0.236986
Tnp1	1000	28	23	30	29	0.495898	0.317406	0.651705
Pinc	1000	18	22	24	44	-0.200306	-0.0452471	0.146029
Tns1	1000	67	45	23	27	1.46081	1.01221	0.459393
Cxcr1	1000	21	29	31	34	0.129555	0.407129	0.574108
Aamp	1000	259	157	96	45	2.79629	2.12217	1.61329
Tmbim1	1000	29	27	22	61	-0.0923613	-0.164051	-0.209351
Usp37	1000	34	39	32	50	0.244374	0.376192	0.303375
Zfp142	1000	218	174	67	49	2.48891	2.18276	1.11054
Rnf25	1000	94	88	48	58	1.24523	1.15831	0.588555
Prkag3	1000	37	40	14	30	0.740351	0.815245	0.0126444
Fev	1000	19	36	13	24	0.29233	0.859454	0.103597
Cryba2	1000	58	55	18	38	1.04278	0.977997	0.0256115
Mir375	1000	37	38	13	33	0.670556	0.692766	-0.10142
Ccdc108	1000	33	32	24	87	-0.330239	-0.366761	-0.48132
Ihh	1000	28	35	13	30	0.471862	0.680316	-0.0362652
Nhej1	1000	90	85	50	51	1.31063	1.2352	0.74592
Slc23a3	1000	15	32	22	23	0.143949	0.770779	0.518232
1810031K17Rik	1000	103	100	46	45	1.58782	1.54553	0.760136
Abcb6	1000	154	105	43	31	2.39818	1.90304	0.96635
Atg9a	1000	186	155	91	35	2.55613	2.31087	1.74021
Glb1l	1000	92	72	35	43	1.48661	1.1858	0.514919
Tuba4a	1000	68	58	20	49	1.01086	0.822358	-0.0945771
Ptprn	1000	24	48	24	47	-0.0227785	0.649742	0.092217
Resp18	1000	36	32	21	42	0.451918	0.331138	0.0705774
Dnpep	1000	259	229	99	38	2.93662	2.76489	1.78364
Chpf	1000	142	134	66	22	2.52074	2.44194	1.65297
Obsl1	1000	73	59	21	22	1.6927	1.44194	0.504875
Epha4	1000	116	95	32	32	2.00992	1.75526	0.646955
Pax3	1000	128	102	22	47	1.82522	1.53239	0.0182164
Farsb	1000	111	109	74	54	1.51926	1.49051	1.14388
Scg2	1000	63	55	58	43	1.0355	0.876113	1.05195
Ap1s3	1000	40	31	20	29	0.843821	0.586593	0.298068
Wdfy1	1000	98	79	55	61	1.24868	0.97954	0.692469
Serpine2	1000	46	51	19	30	0.966627	1.07398	0.235037
Fam124b	1000	23	35	17	45	-0.0215964	0.359971	-0.149666
Cul3	1000	145	139	64	11	2.88691	2.82969	1.92705
Dock10	1000	31	33	12	35	0.452503	0.507732	-0.193903
Irs1	1000	95	88	53	20	2.06739	1.96978	1.45553
Col4a4	1000	24	31	12	17	0.683211	0.912594	0.235375
Tm4sf20	1000	21	17	10	40	0.00127597	-0.168977	-0.400438
Slc19a3	1000	52	35	26	51	0.670174	0.249409	0.0938436
Sphkap	1000	60	36	29	45	0.940929	0.387985	0.297793
Pid1	1000	59	61	26	39	1.04124	1.07408	0.310821
Dner	1000	55	66	24	49	0.768293	0.970457	0.057426
Trip12	1000	133	119	50	61	1.63495	1.4865	0.587116
Slc16a14	1000	64	47	32	40	1.11375	0.763909	0.484085
A530032D15Rik	1000	7	14	19	6	0.264659	0.646482	0.900646
C130026I21Rik	1000	5	17	10	10	-0.0165182	0.633296	0.33731
Sp110	1000	16	41	16	21	0.244694	1.07385	0.320984
A630001G21Rik	1000	73	49	43	40	1.26756	0.808997	0.781765
Gpr55	1000	26	33	9	27	0.478092	0.696185	-0.182153
Htr2b	1000	28	19	22	51	0.042143	-0.293733	-0.0505463
Ncl	1000	214	164	93	41	2.617	2.25811	1.64818
Snora75	1000	12	10	7	51	-0.609934	-0.722576	-0.774912
Snord82	1000	17	24	12	76	-0.758777	-0.487774	-0.8595
Nmur1	1000	31	38	13	42	0.306067	0.501063	-0.280895
Pde6d	1000	168	89	71	67	1.84774	1.03213	0.898149
Nppc	1000	71	76	39	38	1.27627	1.35181	0.719508
Alppl2	1000	38	35	22	19	1.0567	0.970722	0.621438
Alpi	1000	36	37	6	26	0.811514	0.834782	-0.343095
Ecel1	1000	39	31	8	39	0.593786	0.361878	-0.496534
Kcnj13	1000	20	17	18	46	-0.156051	-0.287086	-0.124533
Ngef	1000	34	48	28	29	0.680323	1.032	0.587574
Usp40	1000	53	50	33	56	0.60536	0.535305	0.23465
Dnajb3	1000	39	41	17	39	0.593786	0.640179	-0.0371023
Hjurp	1000	291	233	142	135	1.82306	1.5135	1.02168
A730008H23Rik	1000	292	234	142	135	1.82775	1.51929	1.02168
Glrp1	1000	24	18	12	33	0.264564	0.0253408	-0.152046
Arl4c	1000	113	80	47	31	2.00002	1.56914	1.06099
4933400F21Rik	1000	36	34	16	32	0.665967	0.604696	0.061992
Gbx2	1000	115	88	35	36	1.90949	1.57155	0.650685
Asb18	1000	29	42	23	32	0.457381	0.818821	0.347394
Iqca	1000	90	62	34	52	1.29304	0.844756	0.328692
Rab17	1000	32	27	26	26	0.696037	0.533126	0.589791
Ilkap	1000	83	58	43	34	1.54946	1.12473	0.902162
1700020N18Rik	1000	18	24	12	33	0.0300986	0.259806	-0.152046
Hes6	1000	178	123	55	52	2.16504	1.67829	0.834583
Per2	1000	185	173	84	44	2.36328	2.26907	1.46796
Hdac4	1000	19	28	19	39	-0.0582911	0.266721	0.0477866
Ndufa10	1000	118	107	48	29	2.10256	1.97452	1.12814
Olfr1416	1000	18	21	13	25	0.22429	0.342156	0.0793249
Olfr1415	1000	10	27	14	23	-0.109808	0.612081	0.177195
Olfr1414	1000	33	41	15	32	0.580237	0.79373	0.0161883
Myeov2	1000	110	85	42	53	1.52503	1.20015	0.526317
Otos	1000	58	46	27	48	0.846256	0.585402	0.179053
Ankmy1	1000	67	47	24	41	1.14655	0.74354	0.201926
9430060I03Rik	1000	26	33	6	35	0.290231	0.507732	-0.541827
Kif1a	1000	95	87	44	47	1.44971	1.33624	0.677179
2310007B03Rik	1000	28	29	6	18	0.790673	0.819695	-0.140061
Mterfd2	1000	66	76	31	92	0.352494	0.511632	-0.306635
Pask	1000	171	141	86	47	2.20219	1.94436	1.44271
Hdlbp	1000	171	153	67	39	2.35932	2.20817	1.29354
Stk25	1000	232	180	76	48	2.591	2.24592	1.27635
Thap4	1000	116	105	49	20	2.31736	2.18821	1.36938
Dtymk	1000	139	124	62	69	1.57102	1.41783	0.712576
Pdcd1	1000	29	22	12	18	0.823094	0.575769	0.207863
St8sia4	1000	104	85	43	53	1.45464	1.20015	0.550979
Slco4c1	1000	32	32	25	45	0.277964	0.272508	0.163492
Slco6b1	1000	15	20	16	43	-0.314082	-0.103709	-0.157506
Slco6c1	1000	9	9	15	51	-0.773432	-0.77916	-0.344278
D1Ertd622e	1000	45	52	32	35	0.828651	0.980485	0.583704
Ppip5k2	1000	114	103	52	57	1.50262	1.36911	0.691625
Pam	1000	57	47	25	29	1.22629	1.00928	0.485695
Rnf152	1000	51	44	24	32	1.03162	0.867731	0.38392
Pign	1000	172	151	72	41	2.3261	2.14996	1.33943
Bcl2	1000	65	49	42	31	1.32864	1.00654	0.941688
Kdsr	1000	167	113	71	49	2.13425	1.62413	1.17844
Vps4b	1000	125	78	52	63	1.52415	0.933021	0.600419
Serpinb3a	1000	16	5	24	26	0.111075	-0.500821	0.519401
Serpinb3d	1000	13	11	11	44	-0.429788	-0.538287	-0.421012
Serpinb3b	1000	11	4	13	27	-0.159338	-0.596597	0.0319719
Serpinb3c	1000	5	7	4	16	-0.215718	-0.0876249	-0.222004
Cdh19	1000	13	14	16	28	-0.0811094	-0.0365821	0.150885
Dsel	1000	106	84	42	41	1.70225	1.41012	0.737979
Tsn	1000	120	98	48	36	1.96353	1.704	0.97826
2900060B14Rik	1000	117	86	48	61	1.47107	1.08211	0.542722
Gli2	1000	129	104	31	28	2.24082	1.96342	0.705474
Inhbb	1000	34	46	19	33	0.586492	0.892074	0.169882
Ralb	1000	177	150	57	51	2.17517	1.95202	0.891351
Epb4.1l5	1000	86	79	33	39	1.48485	1.37714	0.533213
Ptpn4	1000	176	153	65	24	2.74801	2.55989	1.58547
Tmem177	1000	131	79	31	50	1.80019	1.16469	0.273001
Gm101	1000	18	35	23	52	-0.347415	0.231779	-0.0297621
Tmem37	1000	74	54	21	30	1.50428	1.13717	0.315207
Dbi	1000	193	123	76	44	2.41959	1.82577	1.34766
Steap3	1000	59	29	21	30	1.24125	0.499744	0.315207
Marco	1000	14	29	22	43	-0.361388	0.218219	0.0904212
Insig2	1000	107	115	54	31	1.9313	2.0176	1.21299
Htr5b	1000	44	38	16	46	0.580915	0.423408	-0.211996
Ddx18	1000	77	72	32	60	0.970794	0.884999	0.142801
Dpp10	1000	29	43	36	20	0.764823	1.15199	1.04745
Actr3	1000	205	185	89	36	2.66396	2.52216	1.69251
Lypd1	1000	39	45	15	23	0.971112	1.11655	0.2245
Nckap5	1000	45	26	10	27	1.01651	0.473792	-0.125569
Tmem163	1000	36	37	21	32	0.665967	0.688761	0.271445
Ysk4	1000	14	28	20	44	-0.380878	0.166257	-0.00597412
Zranb3	1000	203	142	124	71	2.04097	1.56357	1.52896
Lct	1000	29	33	22	37	0.34639	0.464229	0.205992
Mcm6	1000	151	94	52	50	1.98422	1.37619	0.805875
Dars	1000	124	74	31	70	1.40975	0.765946	-0.0320509
Cxcr4	1000	81	82	35	39	1.41234	1.422	0.590929
Daf2	1000	20	18	4	17	0.531208	0.445468	-0.250051
Cd55	1000	53	45	18	31	1.09731	0.914911	0.17117
Zp3r	1000	4	23	18	46	-1.00405	-0.0460775	-0.124533
C4bp	1000	26	19	23	39	0.204743	-0.0634279	0.203906
C4bp-ps1	1000	18	19	28	38	-0.0792095	-0.0424676	0.39758
Pfkfb2	1000	100	118	47	41	1.62949	1.83235	0.857278
Il24	1000	11	23	12	50	-0.644595	-0.119765	-0.474233
Il20	1000	35	30	23	45	0.365427	0.211108	0.0913418
Il19	1000	27	44	17	31	0.415053	0.891064	0.128101
Mapkapk2	1000	87	62	30	30	1.69893	1.29329	0.629316
Dyrk3	1000	104	81	38	66	1.24594	0.932702	0.224315
Rassf5	1000	59	41	21	39	1.04124	0.640179	0.127957
Ikbke	1000	35	28	13	30	0.684856	0.467322	-0.0362652
Srgap2	1000	357	305	188	72	2.79508	2.57205	2.05855
Mfsd4	1000	31	41	21	31	0.543377	0.817064	0.29316
Cdk18	1000	44	36	27	31	0.895679	0.684613	0.509972
Tmcc2	1000	75	73	23	26	1.61887	1.58259	0.482875
Cntn2	1000	51	60	23	49	0.684635	0.860832	0.0209001
Nfasc	1000	26	30	16	38	0.225645	0.351811	-0.0618513
Mdm4	1000	111	111	49	23	2.17844	2.1745	1.29267
Sox13	1000	64	62	14	22	1.53889	1.49853	0.202312
Snrpe	1000	197	112	72	63	2.11931	1.37843	0.972387
Zc3h11a	1000	142	90	55	76	1.50061	0.918219	0.482892
Zbed6	1000	145	107	64	53	1.87866	1.48445	0.990264
Lax1	1000	24	27	21	34	0.24203	0.34154	0.228972
Atp2b4	1000	21	35	42	41	-0.0190372	0.438686	0.737979
Optc	1000	36	21	9	31	0.689228	0.193627	-0.272437
Prelp	1000	46	40	29	23	1.14395	0.993171	0.762157
Btg2	1000	168	126	64	37	2.3781	1.99927	1.27999
Adora1	1000	39	29	24	26	0.892434	0.598714	0.519401
Ppfia4	1000	29	41	10	20	0.764823	1.10223	0.0474479
Tmem183a	1000	111	84	46	47	1.64398	1.2936	0.724485
4931440L10Rik	1000	22	29	19	41	0.0194369	0.258113	0.00928111
Ppp1r12b	1000	142	125	67	74	1.52795	1.35724	0.73443
9530009M10Rik	1000	30	47	24	40	0.315385	0.763909	0.22105
Lgr6	1000	45	32	23	37	0.785274	0.434481	0.243467
Ptprv	1000	23	33	12	20	0.558372	0.884053	0.154363
Gpr37l1	1000	27	22	9	31	0.415053	0.232101	-0.272437
Elf3	1000	94	56	34	42	1.53284	0.9161	0.50498
Rnpep	1000	58	59	24	50	0.809971	0.823651	0.0403401
Timm17a	1000	128	90	63	44	1.88216	1.43475	1.12788
Shisa4	1000	60	75	29	34	1.16803	1.42307	0.511372
Ipo9	1000	104	91	56	56	1.40373	1.23238	0.789865
Nav1	1000	95	83	40	31	1.7832	1.61353	0.891062
Pkp1	1000	31	35	15	30	0.567019	0.680316	0.0599501
Igfn1	1000	32	27	21	41	0.356472	0.192525	0.0894515
5730559C18Rik	1000	86	86	28	45	1.36543	1.35997	0.265371
Gpr25	1000	20	29	20	31	0.158713	0.476027	0.253632
Camsap1l1	1000	103	112	59	59	1.34248	1.44163	0.801934
9230116N13Rik	1000	72	60	39	59	0.907093	0.689556	0.354475
Nr5a2	1000	28	27	20	47	0.114725	0.0760072	-0.0597861
Ptprc	1000	22	17	12	44	-0.039841	-0.24878	-0.368544
Nek7	1000	52	47	23	59	0.535124	0.418908	-0.141483
Lhx9	1000	41	30	21	42	0.584368	0.269737	0.0705774
2310009B15Rik	1000	33	42	23	46	0.288734	0.526501	0.0734063
Crb1	1000	39	55	23	72	0.0334052	0.395365	-0.328475
Cfhr1	1000	7	9	11	40	-0.684615	-0.569515	-0.34599
EG214403	1000	3	17	7	20	-0.479102	0.313737	-0.12943
BC026782	1000	13	8	16	41	-0.37051	-0.648777	-0.120002
Cfh	1000	14	10	19	38	-0.259782	-0.471311	0.0674317
Cdc73	1000	83	78	24	30	1.64179	1.56248	0.427682
Trove2	1000	165	142	53	31	2.48863	2.28795	1.19223
Rgs2	1000	135	128	63	45	1.93141	1.85747	1.10972
Rgs13	1000	15	18	29	53	-0.498058	-0.370601	0.160189
Rgs1	1000	18	11	20	48	-0.275734	-0.613907	-0.0772865
Rgs18	1000	22	9	18	45	-0.0590711	-0.668598	-0.106598
Pla2g4a	1000	24	16	17	41	0.0934375	-0.23374	-0.0756078
7530420F21Rik	1000	48	44	19	65	0.354072	0.254734	-0.386926
BC003331	1000	200	180	93	51	2.3376	2.19169	1.46971
Prg4	1000	16	14	23	53	-0.452255	-0.551174	-0.0462617
Hmcn1	1000	89	48	23	47	1.36954	0.649742	0.0556911
1200016B10Rik	1000	231	173	88	36	2.82443	2.43335	1.6787
Rnf2	1000	119	113	38	45	1.76982	1.69877	0.560827
1700025G04Rik	1000	91	103	31	26	1.85254	2.00168	0.752062
Tsen15	1000	43	31	22	36	0.758705	0.425695	0.226188
Rgl1	1000	81	70	27	54	1.13049	0.950991	0.0782878
Smg7	1000	18	11	22	45	-0.219536	-0.557567	0.0538671
Lamc2	1000	34	37	17	49	0.262402	0.340825	-0.220108
Lamc1	1000	143	111	53	26	2.42396	2.09555	1.306
E330020D12Rik	1000	13	11	11	23	0.0477337	-0.0592965	0.0251916
Dhx9	1000	114	100	43	37	1.8769	1.7075	0.840708
Npl	1000	32	35	24	43	0.316684	0.398792	0.164422
5830403L16Rik	1000	38	39	21	33	0.697523	0.719238	0.250052
Cacna1e	1000	37	38	21	30	0.740351	0.762778	0.315207
Ier5	1000	155	98	79	78	1.58785	0.996304	0.877223
Mr1	1000	30	24	24	80	-0.332791	-0.54105	-0.396029
Xpr1	1000	118	100	48	45	1.75909	1.54553	0.80594
Lhx4	1000	54	44	11	24	1.29233	1.06591	0.000503826
Qsox1	1000	87	83	41	39	1.49893	1.43665	0.751394
Cep350	1000	152	156	76	45	2.08532	2.11381	1.3295
Tor1aip1	1000	38	27	25	69	0.0497784	-0.28519	-0.215274
Fam163a	1000	37	32	25	29	0.764387	0.616966	0.485695
Tdrd5	1000	27	40	21	30	0.438695	0.815245	0.315207
9430070O13Rik	1000	15	10	12	63	-0.661205	-0.921128	-0.679689
Soat1	1000	106	83	30	38	1.76407	1.45761	0.461711
Tor3a	1000	102	45	19	45	1.57564	0.618283	-0.0647774
Fam20b	1000	108	83	41	32	1.91972	1.5902	0.894882
Ralgps2	1000	58	40	22	19	1.51126	1.10565	0.621438
1700057K13Rik	1000	22	26	11	17	0.609211	0.750323	0.182908
Rasal2	1000	111	81	34	38	1.82201	1.42816	0.582005
Fam5b	1000	83	88	54	31	1.61815	1.68461	1.21299
Pappa2	1000	18	15	8	54	-0.381962	-0.521078	-0.763014
Tnn	1000	20	34	17	32	0.135453	0.604696	0.106386
Cacybp	1000	224	169	100	39	2.71932	2.33867	1.77648
Rabgap1l	1000	93	96	53	49	1.38673	1.42026	0.844022
Gpr52	1000	21	23	20	46	-0.116522	-0.0460775	-0.0420709
Zbtb37	1000	116	107	38	38	1.87772	1.77076	0.693036
Dars2	1000	164	160	71	63	1.87645	1.83786	0.955899
Klhl20	1000	81	79	46	65	0.953985	0.917699	0.437988
4930469G21Rik	1000	13	15	27	51	-0.559308	-0.46882	0.127791
Prdx6	1000	58	48	47	48	0.846256	0.631206	0.730068
Fasl	1000	16	36	11	31	-0.0112116	0.684613	-0.161406
AI848100	1000	229	185	87	38	2.76997	2.4793	1.62465
Dnm3	1000	81	80	41	32	1.56544	1.5458	0.894882
Mettl13	1000	107	101	51	73	1.18056	1.10195	0.438784
7420461P10Rik	1000	42	31	17	42	0.609459	0.300764	-0.0944819
Prrc2c	1000	129	102	46	60	1.61154	1.30821	0.512035
Fmo4	1000	16	18	42	34	-0.0798985	0.00273854	0.8775
Fmo1	1000	21	17	18	49	-0.172001	-0.342701	-0.177039
Fmo2	1000	14	18	7	40	-0.301287	-0.125908	-0.577316
Fmo6	1000	20	20	15	53	-0.28233	-0.288139	-0.377468
Fmo3	1000	40	21	20	44	0.519586	-0.0837212	-0.00597412
4921528O07Rik	1000	17	19	24	40	-0.163783	-0.0840881	0.22105
Prrx1	1000	59	37	37	62	0.628927	0.121894	0.255682
Gorab	1000	129	96	56	69	1.4748	1.0959	0.597099
Mettl11b	1000	44	17	12	56	0.403726	-0.464695	-0.572705
BC055324	1000	115	80	52	55	1.54703	1.09268	0.723355
Blzf1	1000	144	147	98	69	1.61682	1.63727	1.26006
Atp1b1	1000	97	83	39	31	1.80897	1.61353	0.865067
Xcl1	1000	34	15	14	36	0.519919	-0.174697	-0.114849
Tbx19	1000	25	35	24	31	0.34634	0.656599	0.405635
Sft2d2	1000	64	50	26	35	1.21984	0.937416	0.391059
Tiprl	1000	143	130	81	50	1.9134	1.78466	1.31832
Dcaf6	1000	287	211	129	49	2.86172	2.43945	1.91541
Mpzl1	1000	164	119	59	53	2.0396	1.61875	0.897155
Rcsd1	1000	41	40	22	32	0.798418	0.768195	0.30992
Pou2f1	1000	26	30	42	67	-0.283504	-0.158549	0.313186
Dusp27	1000	23	42	24	34	0.205504	0.773257	0.341447
Mael	1000	11	16	19	47	-0.589819	-0.350258	-0.100428
Pogk	1000	82	68	33	38	1.44804	1.22057	0.552858
Gm4846	1000	0	9	10	14	-0.544643	0.0963314	0.214294
Gm4847	1000	17	18	19	51	-0.372895	-0.335553	-0.169191
Fmo9	1000	23	17	14	62	-0.31449	-0.561632	-0.565347
Uck2	1000	82	91	32	37	1.46925	1.59099	0.543027
Mgst3	1000	90	79	59	41	1.49943	1.33612	1.10882
Lrrc52	1000	22	32	23	39	0.0603534	0.392252	0.203906
Pbx1	1000	208	132	69	56	2.30419	1.70036	1.02933
Nuf2	1000	138	87	77	63	1.65139	1.06493	1.05211
Rgs4	1000	40	41	31	40	0.599178	0.619519	0.453711
Hsd17b7	1000	143	150	86	68	1.62234	1.67818	1.11355
Ddr2	1000	30	22	16	46	0.197586	-0.0835522	-0.211996
Uap1	1000	143	136	59	35	2.2108	2.14095	1.22756
Uhmk1	1000	61	28	31	36	1.14285	0.330538	0.532849
Gm7694	1000	28	17	26	44	0.171663	-0.24878	0.216418
Nos1ap	1000	41	43	17	44	0.545122	0.589468	-0.131505
Atf6	1000	96	62	53	78	0.977348	0.448817	0.415892
Dusp12	1000	62	63	44	38	1.11873	1.13203	0.845039
Fcrlb	1000	21	23	21	23	0.399206	0.471218	0.479757
Fcrla	1000	29	27	14	29	0.52832	0.458269	0.0350334
Fcgr2b	1000	16	19	10	46	-0.325976	-0.202197	-0.511556
Fcgr3	1000	23	18	19	42	0.0368805	-0.166362	-0.00959295
Sdhc	1000	140	97	42	51	1.86811	1.39716	0.559507
Pcp4l1	1000	45	39	29	58	0.394604	0.239229	0.0804082
Tomm40l	1000	195	151	89	47	2.37639	2.03345	1.48453
Fcer1g	1000	10	41	14	40	-0.507738	0.619519	-0.193987
Ndufs2	1000	156	105	63	54	1.95684	1.44359	0.955804
Ppox	1000	223	136	88	67	2.22504	1.56582	1.15564
Usp21	1000	117	107	58	50	1.6558	1.53735	0.927865
Ufc1	1000	57	38	38	73	0.427866	-0.013525	0.127582
Nit1	1000	66	69	31	51	0.940263	0.986375	0.256115
Klhdc9	1000	128	108	60	91	1.17669	0.954108	0.398114
Itln1	1000	29	40	26	60	-0.0765115	0.232923	-0.0498442
Ly9	1000	18	15	12	38	-0.0792095	-0.217554	-0.254496
Slamf7	1000	19	22	18	32	0.0948105	0.208768	0.149455
Vangl2	1000	123	108	31	26	2.23002	2.06106	0.752062
Nhlh1	1000	68	53	16	27	1.47809	1.19	0.173991
Ncstn	1000	132	94	54	57	1.68971	1.25565	0.733445
Pea15a	1000	102	62	26	49	1.50119	0.898307	0.127815
Casq1	1000	35	31	24	37	0.526962	0.404108	0.279993
Atp1a4	1000	30	31	21	19	0.825373	0.852885	0.582963
Atp1a2	1000	46	24	22	34	0.874298	0.237204	0.267446
Kcnj9	1000	37	43	23	45	0.420922	0.570189	0.0913418
Slamf8	1000	31	37	23	34	0.47469	0.643196	0.304921
Fcrl6	1000	15	8	20	36	-0.169741	-0.543931	0.148185
Dusp23	1000	144	90	49	63	1.70653	1.10635	0.535324
Apcs	1000	24	12	20	21	0.566622	0.0483151	0.490909
Olfr1408	1000	9	8	10	19	-0.0543324	-0.116741	0.0739498
Olfr1406	1000	11	4	6	50	-0.644595	-1.08324	-0.822156
Fcer1a	1000	17	12	20	42	-0.204128	-0.44647	0.031049
Darc	1000	31	27	18	40	0.346411	0.212894	-0.0134148
Cadm3	1000	49	53	27	38	0.855696	0.936774	0.364413
BC094916	1000	12	4	6	25	-0.0558182	-0.54537	-0.319224
Pydc4	1000	7	11	8	14	-0.0210812	0.207363	0.0988166
Ifi204	1000	10	7	9	9	0.327652	0.148687	0.313193
Mndal	1000	5	3	6	8	0.0565013	-0.0897923	0.161982
Mnda	1000	3	8	4	4	0.0702705	0.406243	0.165551
Ifi203	1000	8	3	3	5	0.366111	0.0277851	0.0549678
Ifi202b	1000	5	3	6	31	-0.618894	-0.767899	-0.456861
Ifi205	1000	16	15	11	37	-0.145463	-0.196285	-0.287048
Olfr231	1000	11	20	11	48	-0.60831	-0.198869	-0.492324
Olfr419	1000	24	17	15	41	0.0934375	-0.189346	-0.165806
Grem2	1000	49	40	19	37	0.876905	0.656874	0.087348
Rgs7	1000	47	57	29	48	0.614083	0.82103	0.244642
Fh1	1000	157	124	62	72	1.68667	1.3749	0.671525
Opn3	1000	222	182	84	38	2.72815	2.45761	1.582
Chml	1000	18	8	26	66	-0.573489	-1.08225	-0.138255
Pld5	1000	37	36	24	55	0.241527	0.208159	-0.0421795
B020018G12Rik	1000	16	7	5	14	0.455357	-0.0239628	-0.0938285
Cep170	1000	10	15	20	73	-1.06152	-0.814216	-0.45738
Mir350	1000	13	11	18	57	-0.661762	-0.770817	-0.308375
Akt3	1000	23	29	20	41	0.0569116	0.258113	0.0499231
Adss	1000	205	176	65	65	2.14197	1.93281	0.823641
Hnrnpu	1000	106	86	45	41	1.70225	1.43869	0.810735
Smyd3	1000	65	57	36	76	0.536678	0.380123	0.0335843
Tfb2m	1000	191	147	59	28	2.7544	2.40526	1.3797
Ahctf1	1000	104	80	30	66	1.24594	0.917751	-0.00701057
Adck3	1000	14	29	18	38	-0.259782	0.320103	0.0256115
Psen2	1000	28	37	20	46	0.133456	0.396441	-0.0420709
Gm5069	1000	72	42	10	21	1.70413	1.09894	0.0214241
6330403A02Rik	1000	54	42	32	42	0.880761	0.604156	0.446087
Mixl1	1000	34	30	10	19	0.945668	0.821858	0.0739498
H3f3a	1000	139	115	42	14	2.73148	2.4859	1.37184
Ephx1	1000	65	49	31	36	1.21591	0.893474	0.532849
Nvl	1000	143	136	68	80	1.45653	1.38495	0.67436
Wdr26	1000	86	75	18	28	1.73333	1.56432	0.238348
Ccdc121	1000	35	28	11	33	0.615061	0.39731	-0.204513
Lbr	1000	165	128	40	35	2.39776	2.06295	0.806097
Enah	1000	45	51	20	18	1.26198	1.39393	0.570433
Vmn1r1	1000	21	11	18	28	0.270363	-0.188585	0.238348
Degs1	1000	88	83	43	34	1.62054	1.54463	0.902162
Fbxo28	1000	73	72	41	67	0.799912	0.777321	0.288095
Capn2	1000	67	53	29	38	1.20837	0.936774	0.430002
4922505E12Rik	1000	17	26	15	37	-0.101069	0.241836	-0.0877387
1700056E22Rik	1000	288	165	99	29	3.28439	2.53185	1.97363
Hlx	1000	68	37	19	41	1.16383	0.494181	0.00928111
Mosc1	1000	28	21	16	23	0.649184	0.395269	0.270304
Mosc2	1000	85	84	37	44	1.37044	1.35068	0.552021
Mir1981	1000	39	39	15	42	0.532838	0.527535	-0.18468
C130074G19Rik	1000	32	33	22	38	0.41829	0.442959	0.186076
Mark1	1000	41	43	29	37	0.687427	0.732162	0.449918
Iars2	1000	85	63	31	45	1.35121	0.991326	0.360528
Lyplal1	1000	71	50	40	39	1.25537	0.851683	0.725858
Tgfb2	1000	44	32	25	45	0.599892	0.272508	0.163492
Rrp15	1000	102	84	52	80	1.02629	0.780879	0.369506
Spata17	1000	60	66	49	58	0.711795	0.815421	0.610923
Kctd3	1000	82	54	37	56	1.11155	0.620193	0.347861
Kcnk2	1000	42	51	18	30	0.870411	1.07398	0.193217
Cenpf	1000	200	150	57	42	2.50637	2.12121	1.05095
Smyd2	1000	70	56	25	40	1.21809	0.956554	0.256674
Prox1	1000	75	55	37	38	1.34112	0.977997	0.666069
Rps6kc1	1000	65	66	41	56	0.836686	0.848462	0.45283
Vash2	1000	127	98	57	52	1.72499	1.39224	0.87466
Mfsd7b	1000	225	177	97	49	2.53144	2.20536	1.55568
Tatdn3	1000	91	72	32	54	1.27204	0.984158	0.236986
Fam71a	1000	19	26	14	36	0.00534533	0.263424	-0.114849
Atf3	1000	89	82	48	32	1.67977	1.57555	1.06199
Nenf	1000	25	35	15	23	0.547305	0.858241	0.2245
Ppp2r5a	1000	211	148	78	40	2.61837	2.14418	1.45371
Dtl	1000	290	225	102	50	2.85791	2.50772	1.60106
1700034H15Rik	1000	29	54	24	42	0.243331	0.875458	0.183052
Traf5	1000	100	78	50	43	1.5897	1.28096	0.886888
Rcor3	1000	61	71	20	16	1.65875	1.83176	0.625993
Hhat	1000	33	30	25	57	0.094967	-0.00214285	-0.0382858
Sertad4	1000	34	42	27	43	0.375578	0.584347	0.268758
Syt14	1000	123	103	59	36	1.995	1.76592	1.20708
AA408296	1000	160	103	65	49	2.07798	1.50772	1.07535
Traf3ip3	1000	27	21	24	33	0.368901	0.147331	0.362527
Hsd11b1	1000	14	35	23	44	-0.380878	0.379251	0.109503
G0s2	1000	59	53	27	34	1.14892	1.0238	0.445783
Camk1g	1000	49	39	36	52	0.58749	0.340713	0.385275
Mir205	1000	45	37	22	32	0.896265	0.688761	0.30992
C030002c11rik	1000	56	34	20	37	1.02446	0.493375	0.12799
Cd46	1000	60	32	23	47	0.903221	0.234705	0.0556911
Cr1l	1000	39	34	29	98	-0.292672	-0.437153	-0.436
Cr2	1000	39	33	13	38	0.614687	0.442959	-0.20387
Cnksr3	1000	92	52	30	38	1.58822	0.915712	0.461711
Ipcef1	1000	18	13	20	46	-0.238513	-0.473499	-0.0420709
Rgs17	1000	53	54	19	29	1.14499	1.16129	0.257426
Mtrf1l	1000	158	164	82	43	2.17466	2.21822	1.4572
Fbxo5	1000	255	204	88	18	3.41339	3.1092	2.10095
Syne1	1000	65	57	22	24	1.5029	1.34884	0.493544
Rmnd1	1000	130	100	56	41	1.96133	1.62424	1.04992
Gm5512	1000	17	34	16	35	-0.057692	0.536878	-0.00125813
Zbtb2	1000	62	50	28	27	1.37118	1.12587	0.633422
Lrp11	1000	88	77	30	54	1.23101	1.06388	0.175585
A630066F11Rik	1000	96	96	41	26	1.91843	1.91422	1.03036
Nup43	1000	88	50	36	43	1.43216	0.77076	0.542933
Lats1	1000	63	62	39	49	0.922327	0.898307	0.516858
Katna1	1000	104	89	45	54	1.43747	1.23897	0.58276
Ppil4	1000	76	64	39	45	1.21656	1.00947	0.587299
Zc3h12d	1000	15	38	20	22	0.171158	0.968012	0.465347
Gm5177	1000	21	25	25	32	0.174981	0.318392	0.419544
Shprh	1000	170	166	90	58	2.00303	1.96566	1.31648
Fbxo30	1000	142	108	21	16	2.69575	2.34301	0.665521
Epm2a	1000	42	46	31	49	0.476527	0.567101	0.290087
Sf3b5	1000	143	102	64	47	1.96818	1.53239	1.09222
Plagl1	1000	78	43	31	42	1.30607	0.628818	0.415713
Fuca2	1000	74	42	24	54	1.02243	0.382707	-0.0260489
Adat2	1000	61	38	46	51	0.849498	0.331871	0.655722
Hivep2	1000	95	56	27	17	2.1557	1.52793	0.854285
Nmbr	1000	23	33	30	40	0.0772248	0.401339	0.422684
Cited2	1000	172	120	47	24	2.71764	2.24648	1.2229
Txlnb	1000	33	36	26	51	0.197421	0.277424	0.0938436
Reps1	1000	59	67	20	21	1.47351	1.616	0.490909
Nhsl1	1000	98	72	27	46	1.50691	1.12795	0.214269
Perp	1000	47	35	21	22	1.19424	0.88555	0.504875
Olig3	1000	44	18	23	33	0.849526	0.0253408	0.326001
Ifngr1	1000	153	106	47	25	2.53771	2.06344	1.19862
Il22ra2	1000	31	20	28	32	0.520116	0.130765	0.521424
Il20ra	1000	43	31	14	34	0.802745	0.469865	-0.0735907
Map3k5	1000	57	51	23	21	1.43452	1.30705	0.606387
Mtap7	1000	31	36	10	27	0.640363	0.781914	-0.125569
Gm6251	1000	11	9	18	46	-0.571088	-0.687624	-0.124533
Bclaf1	1000	172	147	76	42	2.30607	2.0949	1.38469
Fam54a	1000	115	100	63	74	1.2576	1.07567	0.663171
Ahi1	1000	134	127	58	60	1.66045	1.58544	0.767292
Hbs1l	1000	75	69	45	61	0.92358	0.819075	0.473459
Aldh8a1	1000	17	30	12	29	0.0808606	0.555566	-0.0645023
1700020N01Rik	1000	11	11	16	46	-0.571088	-0.576592	-0.211996
Sgk1	1000	39	56	22	52	0.346482	0.729278	-0.0672368
Raet1a	1000	61	36	30	50	0.867304	0.295272	0.241974
Raet1e	1000	10	5	3	14	0.155797	-0.155207	-0.238218
Raet1b	1000	6	4	2	8	0.123616	-0.0157918	-0.127525
Raet1c	1000	5	4	2	8	0.0565013	-0.0157918	-0.127525
H60b	1000	14	8	2	25	0.0437175	-0.282335	-0.608731
C920009B18Rik	1000	102	99	51	96	0.831238	0.787142	0.160106
Raet1d	1000	9	6	1	1	0.597349	0.412634	0.0467509
Gm10825	1000	1	0	0	0	0.0874628	0	0
Slc2a12	1000	73	47	23	44	1.18796	0.684105	0.109503
1110021L09Rik	1000	31	39	22	37	0.409126	0.630879	0.205992
Vnn3	1000	23	16	15	13	0.773531	0.485392	0.497835
Vnn1	1000	24	21	20	28	0.382838	0.265981	0.32081
Taar1	1000	14	33	16	52	-0.527987	0.174063	-0.315164
Taar2	1000	32	37	22	50	0.18548	0.322753	-0.0336604
Taar3	1000	23	18	10	66	-0.37555	-0.579748	-0.830133
Taar4	1000	12	17	15	53	-0.6449	-0.41367	-0.377468
Taar5	1000	34	27	12	70	-0.0756766	-0.299642	-0.779285
Taar7b	1000	13	15	25	49	-0.523473	-0.432899	0.0930499
Taar7d	1000	10	13	13	46	-0.625536	-0.473499	-0.354015
Taar7e	1000	8	8	22	34	-0.494936	-0.499762	0.267446
Taar7f	1000	20	15	23	30	0.182355	-0.0379132	0.391156
Taar8a	1000	3	3	4	32	-0.786545	-0.791232	-0.61608
Stx7	1000	72	64	43	68	0.768892	0.625071	0.323765
Moxd1	1000	48	35	12	23	1.18975	0.858241	0.077659
Ctgf	1000	70	50	43	55	0.939871	0.552113	0.518535
Med23	1000	121	105	56	57	1.57829	1.39316	0.774087
Epb4.1l2	1000	115	69	33	38	1.86675	1.23764	0.552858
Gm9767	1000	32	23	15	35	0.482876	0.178424	-0.0470618
Samd3	1000	24	18	16	41	0.0934375	-0.146277	-0.120002
Arhgap18	1000	83	80	32	37	1.48389	1.43448	0.543027
Ptprk	1000	107	75	26	32	1.90804	1.46863	0.454309
Themis	1000	16	16	17	44	-0.287768	-0.293175	-0.131505
6330407J23Rik	1000	109	121	56	40	1.75761	1.88466	1.06905
9330159F19Rik	1000	49	24	19	51	0.605079	-0.101088	-0.169191
Echdc1	1000	62	47	40	52	0.850525	0.536633	0.492191
Hddc2	1000	48	54	32	45	0.693001	0.816829	0.390902
Trdn	1000	14	12	31	39	-0.280684	-0.385356	0.473092
Sult3a1	1000	3	7	20	45	-1.05907	-0.788892	-0.0241354
Rsph4a	1000	37	29	29	62	0.128028	-0.114173	0.0196151
Bet3l	1000	22	27	45	50	-0.151555	0.0210972	0.649149
Tspyl1	1000	98	75	54	42	1.58437	1.25397	0.990407
Tspyl4	1000	75	91	65	77	0.691143	0.918261	0.660048
Col10a1	1000	10	13	15	47	-0.644267	-0.492277	-0.275515
Frk	1000	26	29	17	35	0.290231	0.384875	0.043136
Hs3st5	1000	58	60	39	39	1.02188	1.05522	0.699863
Hdac2	1000	114	74	64	39	1.83479	1.29914	1.24043
Lama4	1000	45	34	17	50	0.531255	0.238689	-0.237194
Tube1	1000	103	81	65	63	1.27942	0.978345	0.852806
Fyn	1000	174	125	60	36	2.44592	2.01066	1.22619
Traf3ip2	1000	36	24	23	32	0.665967	0.282768	0.347394
Rev3l	1000	136	134	45	12	2.76959	2.7479	1.50479
Cdk19	1000	289	201	92	43	2.98439	2.48792	1.59738
Slc22a16	1000	29	14	12	23	0.681606	0.0927066	0.077659
Ddo	1000	17	25	17	44	-0.243374	0.0643774	-0.131505
9030224M15Rik	1000	61	26	11	24	1.42983	0.551332	0.000503826
Wasf1	1000	201	165	98	52	2.32667	2.0592	1.51773
Zbtb24	1000	108	97	57	66	1.29324	1.15297	0.659252
Mical1	1000	48	32	22	34	0.920102	0.500238	0.267446
Ppil6	1000	140	86	37	32	2.25093	1.63327	0.789912
Cd164	1000	160	154	64	27	2.54521	2.49087	1.49592
Sesn1	1000	154	115	43	35	2.3073	1.92645	0.881385
Snx3	1000	150	133	77	51	1.95775	1.79615	1.24068
Ostm1	1000	75	47	40	39	1.32022	0.784569	0.725858
Sec63	1000	124	110	49	42	1.88076	1.72346	0.883492
Scml4	1000	58	34	34	30	1.22188	0.651747	0.74961
9030612E09Rik	1000	51	73	21	18	1.39733	1.80358	0.609961
Pdss2	1000	138	107	55	33	2.20942	1.88039	1.19035
Bend3	1000	57	58	12	16	1.58179	1.59827	0.263423
Cd24a	1000	104	99	31	26	2.01797	1.95235	0.752062
F830002L21Rik	1000	37	30	15	42	0.479399	0.269737	-0.18468
Rtn4ip1	1000	101	99	43	52	1.43549	1.40484	0.567479
Speer5-ps1	1000	20	14	10	10	0.761089	0.495793	0.33731
Atg5	1000	117	128	63	40	1.84711	1.95655	1.2029
Mir1929	1000	23	22	20	29	0.321869	0.279931	0.298068
Prep	1000	112	92	35	36	1.87606	1.62599	0.650685
Popdc3	1000	29	37	24	39	0.304279	0.535209	0.240432
Bves	1000	51	41	24	34	0.986191	0.748166	0.341447
Hace1	1000	95	59	22	53	1.34216	0.770755	-0.0837364
Ascc3	1000	88	66	43	68	1.0099	0.660695	0.323765
Sim1	1000	32	37	13	40	0.376785	0.514549	-0.242897
Gp49a	1000	8	4	5	16	-0.0230729	-0.289259	-0.151614
Lilrb4	1000	10	7	5	12	0.222103	0.0426387	-0.033631
Rfx6	1000	42	42	16	30	0.870411	0.865872	0.105754
Vgll2	1000	66	38	16	23	1.5473	0.940704	0.270304
Dcbld1	1000	49	53	26	36	0.89843	0.979631	0.370577
Nepn	1000	27	27	26	43	0.157986	0.152631	0.234811
Nus1	1000	150	126	77	51	1.95775	1.72673	1.24068
Slc35f1	1000	79	72	27	45	1.26286	1.14698	0.232204
Pln	1000	28	19	15	46	0.133456	-0.202197	-0.2578
Asf1a	1000	89	115	54	28	1.77516	2.08995	1.28017
Msl3l2	1000	38	30	23	41	0.526397	0.289822	0.1654
Gja1	1000	71	40	33	61	0.858729	0.217039	0.157432
Hsf2	1000	129	132	65	70	1.46038	1.48355	0.75321
Pkib	1000	34	32	27	48	0.280659	0.216168	0.179053
Fabp7	1000	87	61	50	42	1.43798	1.01296	0.905518
Smpdl3a	1000	19	25	19	47	-0.215424	0.00729447	-0.100428
Gcc2	1000	96	79	36	66	1.1464	0.902644	0.169867
Lims1	1000	212	164	75	45	2.52589	2.1794	1.31373
Ranbp2	1000	151	104	64	57	1.86396	1.38119	0.92609
Ccdc138	1000	95	60	37	46	1.46844	0.916448	0.515925
BB019430	1000	28	23	23	35	0.357346	0.178424	0.284144
Sh3rf3	1000	49	49	20	28	1.08328	1.0789	0.32081
Ankrd57	1000	149	110	52	25	2.50315	2.10998	1.30881
P4ha1	1000	193	140	48	35	2.60527	2.17842	0.998742
Pla2g12b	1000	39	38	22	30	0.79379	0.762778	0.353681
Cbara1	1000	170	139	57	40	2.33098	2.06275	1.08895
Dnajb12	1000	146	110	62	34	2.25995	1.89256	1.30492
Ascc1	1000	67	83	45	60	0.806675	1.05492	0.488576
Spock2	1000	77	48	20	41	1.31067	0.76626	0.0499231
Psap	1000	67	81	32	49	0.993585	1.21282	0.32046
4632428N05Rik	1000	43	26	18	43	0.614364	0.118684	-0.0700435
LOC100302688	1000	39	40	20	24	0.944407	0.96637	0.415541
Pcbd1	1000	32	23	22	19	0.886774	0.583698	0.621438
Tbata	1000	30	32	25	37	0.378099	0.434481	0.315617
Prf1	1000	17	30	10	23	0.234147	0.709378	-0.0292562
Nodal	1000	32	20	10	22	0.801924	0.38305	-0.00413856
Lrrc20	1000	150	101	58	43	2.10676	1.59673	1.05195
Npffr1	1000	32	36	15	27	0.670737	0.781914	0.128187
Ppa1	1000	109	102	42	26	2.07686	1.9895	1.05545
Sar1a	1000	150	108	44	34	2.29514	1.86947	0.926409
Tysnd1	1000	125	123	82	55	1.65316	1.62666	1.2506
Aifm2	1000	65	59	19	25	1.47668	1.36152	0.350627
Gm5424	1000	18	22	12	22	0.304425	0.461052	0.102777
Neurog3	1000	48	43	18	21	1.24469	1.1236	0.408447
Tacr2	1000	24	27	14	19	0.623739	0.724561	0.280401
4930507D05Rik	1000	23	24	26	44	-0.00236628	0.0287535	0.216418
Slc25a16	1000	104	82	40	47	1.56218	1.26445	0.577644
Dna2	1000	83	63	28	32	1.59488	1.26462	0.521424
Rufy2	1000	69	61	37	40	1.20121	1.05342	0.627043
3110049J23Rik	1000	214	213	63	41	2.617	2.60546	1.18378
Pbld	1000	27	25	20	42	0.177743	0.103727	0.031049
Atoh7	1000	56	51	19	30	1.18236	1.07398	0.235037
Herc4	1000	121	105	73	73	1.33607	1.15045	0.848428
Dnajc12	1000	64	41	22	57	0.802185	0.307185	-0.14791
Ctnna3	1000	173	130	70	28	2.62315	2.24635	1.57715
Jmjd1c	1000	56	39	26	16	1.56189	1.17017	0.848386
Egr2	1000	122	61	44	55	1.62213	0.774506	0.542783
Rtkn2	1000	129	114	32	57	1.66017	1.49666	0.189125
Tmem26	1000	27	32	13	36	0.302327	0.456069	-0.163759
Rhobtb1	1000	62	56	27	34	1.2055	1.0852	0.445783
Ank3	1000	36	35	17	32	0.665967	0.633265	0.106386
Ccdc6	1000	74	63	21	15	1.91517	1.72407	0.694125
Slc16a9	1000	42	51	26	32	0.823509	1.02693	0.454309
Fam13c	1000	66	82	31	34	1.27765	1.52999	0.574108
Ipmk	1000	144	115	42	55	1.83553	1.54114	0.493873
Zwint	1000	132	117	102	60	1.64109	1.48085	1.44048
Pcdh15	1000	41	37	19	54	0.363465	0.252647	-0.218694
Gnaz	1000	137	128	63	40	2.04921	1.95655	1.2029
Rab36	1000	149	89	49	45	2.05932	1.40179	0.828307
Bcr	1000	77	65	20	31	1.52795	1.32402	0.253632
Specc1l	1000	122	118	55	51	1.69124	1.64307	0.851273
Adora2a	1000	38	35	17	27	0.840662	0.7539	0.218385
Gm5779	1000	24	19	21	22	0.53889	0.342408	0.504875
Upb1	1000	36	26	15	19	1.00225	0.690614	0.327706
Snrpd3	1000	173	141	77	33	2.50488	2.2325	1.57976
Ggt1	1000	45	35	11	28	0.991647	0.728953	-0.0942278
Ggt5	1000	26	23	20	27	0.478092	0.366877	0.343916
Derl3	1000	164	124	70	49	2.1104	1.74219	1.16176
Chchd10	1000	46	29	21	49	0.572742	0.104758	-0.0550487
Vpreb3	1000	30	31	10	20	0.796532	0.823932	0.0474479
Gm5134	1000	16	35	13	34	-0.0798985	0.587701	-0.1225
Zfp280b	1000	120	90	36	23	2.27722	1.91374	0.970744
Slc5a4a	1000	20	40	9	29	0.206391	0.839359	-0.228001
S100b	1000	28	47	12	30	0.471862	0.98517	-0.0868913
2610028H24Rik	1000	25	27	18	21	0.602246	0.667225	0.408447
Mcm3ap	1000	81	84	36	48	1.23672	1.27506	0.453228
Lss	1000	190	138	65	25	2.82333	2.39949	1.56119
1700027D21Rik	1000	23	28	13	21	0.530097	0.700392	0.178965
Ftcd	1000	16	18	14	19	0.301811	0.385759	0.280401
Slc19a1	1000	58	58	11	21	1.45415	1.45041	0.0758719
Pofut2	1000	155	119	61	51	2.00056	1.6538	0.968313
LOC100045653	1000	78	100	28	14	2.00995	2.31046	0.973286
Itgb2	1000	22	32	15	13	0.736057	1.07035	0.497835
Pttg1ip	1000	150	143	74	49	1.99359	1.92579	1.22735
Sumo3	1000	111	108	36	41	1.76019	1.72046	0.580438
Ube2g2	1000	82	69	43	40	1.40653	1.19602	0.781765
Mir1930	1000	12	27	15	31	-0.203857	0.410438	0.0379033
LOC16697	1000	27	21	9	30	0.438695	0.217344	-0.25039
LOC100009614	1000	11	14	6	11	0.310883	0.460458	0.0645508
Krtap12-1	1000	22	11	18	7	0.950056	0.455305	0.824009
Krtap10-10	1000	26	32	12	21	0.637012	0.825923	0.128339
Gm10318	1000	16	15	6	34	-0.0798985	-0.130528	-0.52105
Gm3285	1000	18	28	11	31	0.0762512	0.443605	-0.161406
1700009J07Rik	1000	20	20	8	13	0.658054	0.655317	0.128601
1810043G02Rik	1000	127	122	36	31	2.14866	2.0927	0.784147
Dnmt3l	1000	25	38	11	15	0.780865	1.17518	0.239559
Icosl	1000	65	38	18	30	1.35228	0.762778	0.193217
Cstb	1000	89	52	35	47	1.36954	0.737205	0.442714
Ilvbl	1000	123	85	67	41	1.89045	1.42447	1.25504
Slc1a6	1000	47	39	17	19	1.27909	1.07966	0.417904
Olfr1355	1000	5	18	10	35	-0.709769	-0.0195151	-0.300818
Olfr1354	1000	0	0	1	1	-0.046507	-0.0467979	0.0467509
Olfr8	1000	2	3	0	14	-0.374718	-0.299597	-0.486146
Olfr1353	1000	1	6	5	11	-0.356542	0.0129988	-0.00256337
Olfr1352	1000	2	10	16	31	-0.841287	-0.315387	0.083707
Olfr1351	1000	17	13	11	14	0.499751	0.310456	0.268742
Olfr57	1000	24	19	13	28	0.382838	0.18581	0.0088657
Vmn2r80	1000	7	2	10	37	-0.621901	-0.980556	-0.341495
Vmn2r81	1000	4	11	6	28	-0.617162	-0.188585	-0.389684
Vmn2r82	1000	5	5	11	20	-0.334712	-0.338339	0.101896
Vmn2r83	1000	22	17	16	40	0.0397501	-0.168977	-0.100878
Madcam1	1000	69	61	27	32	1.37492	1.22763	0.488257
Gm16517	1000	129	106	76	63	1.56451	1.30917	1.03652
Cdc34	1000	277	174	101	21	3.43945	2.81082	2.19135
Gzmm	1000	25	30	11	24	0.520599	0.682577	0.000503826
Bsg	1000	134	120	42	45	1.92182	1.77501	0.663921
Hcn2	1000	29	30	12	25	0.62868	0.656264	0.0286988
Fgf22	1000	61	56	18	32	1.23231	1.13077	0.149455
Fstl3	1000	22	37	11	19	0.549739	1.02622	0.128398
Palm	1000	57	55	20	29	1.22629	1.18175	0.298068
9130017N09Rik	1000	17	28	12	20	0.317364	0.728775	0.154363
Ptbp1	1000	323	273	117	56	2.90198	2.66584	1.67522
Prtn3	1000	17	10	7	38	-0.122278	-0.471311	-0.538289
Elane	1000	15	20	4	19	0.256008	0.468221	-0.304562
Cfd	1000	35	29	26	21	0.91712	0.732813	0.713302
Kiss1r	1000	75	57	21	32	1.47332	1.15066	0.271445
Arid3a	1000	114	84	31	27	2.10814	1.72533	0.72858
Wdr18	1000	190	166	61	49	2.30505	2.1207	1.00228
Grin3b	1000	19	32	14	39	-0.0582911	0.392252	-0.174606
Cnn2	1000	51	32	26	26	1.17716	0.691824	0.589791
Abca7	1000	155	93	46	42	2.16933	1.51436	0.81532
Hmha1	1000	25	34	12	18	0.688793	0.971698	0.207863
Gpx4	1000	195	165	71	44	2.43333	2.20667	1.26704
Stk11	1000	87	55	24	31	1.67529	1.13392	0.405635
Atp5d	1000	198	140	85	54	2.27204	1.81013	1.31023
Midn	1000	62	76	25	24	1.44845	1.68258	0.603168
Cirbp	1000	170	134	67	50	2.13968	1.82365	1.09345
1600002K03Rik	1000	70	67	32	30	1.4387	1.38293	0.690716
Efna2	1000	68	76	24	31	1.38111	1.50774	0.405635
Mum1	1000	192	160	70	33	2.64308	2.39731	1.46686
Ndufs7	1000	159	128	78	65	1.80528	1.51777	1.03838
Dazap1	1000	153	136	58	45	2.09388	1.93547	1.01539
Rps15	1000	134	106	44	28	2.28973	1.98726	1.05778
Apc2	1000	16	44	19	22	0.216962	1.12002	0.424705
Reep6	1000	226	170	65	44	2.63109	2.24598	1.16395
Plk5	1000	13	35	10	22	0.074943	0.88555	-0.00413856
Onecut3	1000	61	33	16	21	1.51148	0.85567	0.320984
Adat3	1000	117	108	57	71	1.32147	1.21398	0.589502
Scamp4	1000	119	108	57	71	1.343	1.21398	0.589502
Csnk1g2	1000	303	278	140	37	3.17195	3.04919	2.24347
Izumo4	1000	260	197	102	35	3.00644	2.62773	1.88138
Dot1l	1000	122	100	41	42	1.86	1.60416	0.694014
Sf3a2	1000	190	151	65	30	2.69893	2.39159	1.4456
Amh	1000	9	30	10	14	0.0992131	0.976037	0.214294
Oaz1	1000	258	223	117	47	2.75333	2.55061	1.82557
Gm9786	1000	258	224	116	45	2.79103	2.59444	1.85033
Mir1982	1000	27	18	8	24	0.589312	0.246478	-0.169421
3110056O03Rik	1000	108	114	41	24	2.11724	2.18138	1.07851
Tmprss9	1000	26	36	9	22	0.609279	0.913564	-0.0607221
Gadd45b	1000	132	120	61	50	1.80997	1.6823	0.985199
Thop1	1000	174	151	69	50	2.17037	1.97854	1.1278
Map2k2	1000	119	112	56	36	1.95288	1.87111	1.14819
Zbtb7a	1000	24	48	18	26	0.433003	1.10686	0.284936
Eef2	1000	139	115	76	66	1.61517	1.36621	0.992989
Snord37	1000	55	144	48	65	0.503819	1.66977	0.483791
Dapk3	1000	264	199	89	41	2.90079	2.51445	1.59424
2310050B05Rik	1000	29	22	11	27	0.577627	0.329402	-0.0711216
Zfr2	1000	60	81	35	37	1.10246	1.44943	0.63049
Matk	1000	30	32	12	45	0.216563	0.272508	-0.386705
Apba3	1000	94	58	30	61	1.19715	0.619138	0.0662838
Mir3057	1000	12	36	9	21	0.0520492	0.9414	-0.0351594
Pip5k1c	1000	222	197	57	34	2.81492	2.64999	1.20934
2510012J08Rik	1000	303	265	119	32	3.28294	3.09527	2.13881
Tbxa2r	1000	21	39	12	17	0.570737	1.13937	0.235375
F630110N24Rik	1000	90	79	36	35	1.62583	1.46288	0.699182
Dohh	1000	153	147	84	41	2.17239	2.11499	1.52385
2210404O07Rik	1000	20	30	9	20	0.442895	0.792905	-0.00913562
Aes	1000	51	47	18	33	1.00872	0.915158	0.128062
Tle2	1000	47	30	19	17	1.33856	0.881567	0.557304
BC025920	1000	178	145	89	48	2.23672	1.96212	1.46703
Ankrd24	1000	51	55	33	43	0.797811	0.876113	0.457204
Gm10778	1000	56	33	23	25	1.30675	0.747412	0.506746
Zfp873	1000	90	73	58	41	1.49943	1.24199	1.08945
AU041133	1000	75	72	40	53	1.05554	1.00137	0.475691
Tdg	1000	92	61	40	30	1.76732	1.27468	0.913109
Gm9855	1000	92	60	40	30	1.76732	1.25582	0.913109
Hcfc2	1000	55	69	33	37	1.00428	1.25891	0.572775
Txnrd1	1000	28	27	14	35	0.357346	0.319287	-0.0943675
Eid3	1000	27	25	17	33	0.368901	0.29543	0.0849932
Chst11	1000	84	70	39	22	1.86082	1.63939	1.07678
D10Wsu102e	1000	174	125	51	29	2.60632	2.17156	1.19423
A230046K03Rik	1000	129	72	46	81	1.31056	0.583437	0.223742
1500009L16Rik	1000	59	60	29	37	1.08336	1.09745	0.449918
Tcp11l2	1000	141	90	66	36	2.17068	1.59903	1.33581
Polr3b	1000	111	96	65	34	1.90879	1.72263	1.35937
Rfx4	1000	163	79	42	41	2.25533	1.33612	0.737979
Ric8b	1000	172	141	91	48	2.19139	1.92583	1.49426
AI597468	1000	114	105	36	34	1.94247	1.83414	0.719958
Btbd11	1000	134	98	48	35	2.12673	1.72591	0.998742
Pwp1	1000	82	62	40	40	1.40653	1.07203	0.706477
Ascl4	1000	67	69	29	46	1.04906	1.07791	0.279857
Fbxo7	1000	79	70	39	43	1.30158	1.15263	0.623853
Timp3	1000	59	45	26	36	1.10488	0.801844	0.370577
1810014B01Rik	1000	22	16	8	10	0.839092	0.588902	0.221833
BC030307	1000	264	191	110	31	3.11807	2.67766	2.06099
Nt5dc3	1000	150	93	45	43	2.10676	1.49455	0.773231
1700113H08Rik	1000	43	48	29	39	0.695069	0.807289	0.410357
Pah	1000	36	27	15	38	0.533767	0.254514	-0.107655
Igf1	1000	28	31	27	50	0.059949	0.149421	0.144677
Tyms-ps	1000	9	26	17	42	-0.604666	0.138493	-0.0944819
Pmch	1000	22	22	16	44	-0.039841	-0.0452471	-0.175899
Nup37	1000	58	54	34	41	0.980963	0.895543	0.523854
Ccdc53	1000	89	54	35	45	1.40725	0.816829	0.478365
Gnptab	1000	61	67	33	41	1.0383	1.1413	0.494708
Sycp3	1000	23	18	10	33	0.228038	0.0253408	-0.258961
Arl1	1000	111	106	49	38	1.82201	1.75899	0.960516
Slc5a8	1000	20	31	13	38	0.0032527	0.382838	-0.20387
Uhrf1bp1l	1000	72	61	32	54	0.990007	0.791513	0.236986
Anks1b	1000	56	59	32	17	1.53121	1.58682	1.01298
Ikbip	1000	150	153	39	42	2.12652	2.14705	0.642484
Cdk17	1000	87	71	30	33	1.62914	1.38082	0.564161
Mir1931	1000	41	49	20	76	0.0297185	0.212666	-0.49693
Lta4h	1000	149	85	63	51	1.94903	1.2352	1.00531
Hal	1000	31	29	28	40	0.346411	0.278482	0.358554
Ccdc38	1000	36	39	18	18	1.03168	1.1092	0.487971
Ntn4	1000	36	43	24	17	1.06172	1.24065	0.749949
Usp44	1000	30	28	31	49	0.142108	0.0723362	0.290087
Fgd6	1000	219	163	89	30	2.88895	2.49171	1.82
Nr2c1	1000	85	65	47	42	1.40969	1.08603	0.838404
Ndufa12	1000	69	82	43	58	0.873258	1.07258	0.471198
Tmcc3	1000	49	60	24	35	0.920282	1.14095	0.32067
Ccdc41	1000	126	94	35	31	2.13854	1.76553	0.756132
Ube2n	1000	203	192	89	40	2.56661	2.48707	1.61337
Eea1	1000	133	117	33	46	1.89319	1.7238	0.402714
Btg1	1000	179	151	80	41	2.37884	2.14996	1.46496
Dcn	1000	30	18	19	62	-0.0763301	-0.518563	-0.342955
Lum	1000	25	19	18	53	-0.0947027	-0.328781	-0.244201
Kera	1000	14	13	18	61	-0.677324	-0.732335	-0.369815
Epyc	1000	17	7	18	50	-0.355088	-0.881606	-0.194125
4921510H08Rik	1000	20	29	15	27	0.255699	0.573328	0.128187
Atp2b1	1000	91	105	33	14	2.19682	2.37134	1.12856
Poc1b	1000	71	79	31	44	1.15517	1.27668	0.37869
Galnt4	1000	74	57	37	34	1.41195	1.1051	0.747439
Dusp6	1000	167	159	72	58	1.97957	1.90908	1.04799
Kitl	1000	76	43	24	65	0.877634	0.230486	-0.19428
Gm4312	1000	0	0	0	0	0	0	0
Gm4301	1000	0	0	0	0	0	0	0
Gm4303	1000	0	0	0	0	0	0	0
Gm4305	1000	0	0	0	0	0	0	0
Gm4307	1000	0	0	0	0	0	0	0
Gm4302	1000	0	0	0	0	0	0	0
Cep290	1000	106	66	46	61	1.34652	0.767236	0.496918
1700017N19Rik	1000	14	12	17	50	-0.492592	-0.597813	-0.237194
[truncated: 20,287 more rows]
