# Supplementary material for: Dynamics and function of distal regulatory elements during neurogenesis and neuroplasticity
Source: HighWire-hosted journal article supplement (doi:10.1101/gr.190926.115), 2015-07-13
Supplement: Supplemental_Table_S2.xlsx [file Supplemental_Table_S2.xlsx]

## Sheet: H3K27ac_PotentialPeaksMACS
chr1	3358577	3358857	PotentialPeaks_H3K27Ac_peak_1	29	.	2.16298	4.71138	2.93583	237
chr1	3385450	3385636	PotentialPeaks_H3K27Ac_peak_2	65	.	2.5879	8.50226	6.5174	107
chr1	3385766	3385916	PotentialPeaks_H3K27Ac_peak_3	64	.	2.54706	8.43122	6.4486	69
chr1	3386046	3386273	PotentialPeaks_H3K27Ac_peak_4	95	.	2.91215	11.6353	9.54282	119
chr1	3388976	3389269	PotentialPeaks_H3K27Ac_peak_5	56	.	2.51862	7.56209	5.61914	111
chr1	3389804	3390032	PotentialPeaks_H3K27Ac_peak_6	54	.	2.5201	7.42614	5.48779	91
chr1	3390241	3390725	PotentialPeaks_H3K27Ac_peak_7	46	.	2.41159	6.50258	4.61174	115
chr1	3439978	3440128	PotentialPeaks_H3K27Ac_peak_8	40	.	2.36576	5.90982	4.05058	76
chr1	3456746	3457179	PotentialPeaks_H3K27Ac_peak_9	85	.	3.0417	10.6288	8.56398	212
chr1	3467412	3467562	PotentialPeaks_H3K27Ac_peak_10	36	.	2.29817	5.49817	3.66539	106
chr1	3502058	3502412	PotentialPeaks_H3K27Ac_peak_11	154	.	3.04692	17.6672	15.4388	269
chr1	3502614	3503886	PotentialPeaks_H3K27Ac_peak_12	320	.	4.15427	34.4736	32.0472	115
chr1	3504007	3504209	PotentialPeaks_H3K27Ac_peak_13	84	.	2.53153	10.5036	8.44536	131
chr1	3535831	3536057	PotentialPeaks_H3K27Ac_peak_14	36	.	2.29817	5.49817	3.66539	93
chr1	3541203	3541382	PotentialPeaks_H3K27Ac_peak_15	40	.	2.36576	5.90982	4.05058	108
chr1	3571855	3572031	PotentialPeaks_H3K27Ac_peak_16	61	.	2.70373	8.13877	6.16537	102
chr1	3577557	3577732	PotentialPeaks_H3K27Ac_peak_17	48	.	2.50095	6.76809	4.85978	62
chr1	3660642	3661661	PotentialPeaks_H3K27Ac_peak_18	3541	.	9.14502	357.406	354.181	870
chr1	3661801	3662709	PotentialPeaks_H3K27Ac_peak_19	2966	.	8.2387	299.807	296.674	351
chr1	3832039	3832213	PotentialPeaks_H3K27Ac_peak_20	61	.	2.70373	8.13877	6.16537	46
chr1	3832712	3832889	PotentialPeaks_H3K27Ac_peak_21	36	.	2.29817	5.49817	3.66539	89
chr1	3984625	3984846	PotentialPeaks_H3K27Ac_peak_22	158	.	3.76335	18.0811	15.8463	111
chr1	3985087	3985565	PotentialPeaks_H3K27Ac_peak_23	147	.	3.65013	16.9342	14.7187	129
chr1	3992042	3992246	PotentialPeaks_H3K27Ac_peak_24	40	.	2.36576	5.90982	4.05058	73
chr1	4058713	4059341	PotentialPeaks_H3K27Ac_peak_25	117	.	3.44726	13.9238	11.7701	115
chr1	4317116	4317628	PotentialPeaks_H3K27Ac_peak_26	75	.	2.90651	9.60334	7.57276	132
chr1	4412271	4412571	PotentialPeaks_H3K27Ac_peak_27	85	.	3.0417	10.6288	8.56398	158
chr1	4463273	4463797	PotentialPeaks_H3K27Ac_peak_28	60	.	2.55772	8.04836	6.08325	67
chr1	4464139	4464638	PotentialPeaks_H3K27Ac_peak_29	659	.	7.41412	68.5434	65.9226	264
chr1	4464897	4465465	PotentialPeaks_H3K27Ac_peak_30	315	.	4.94006	33.9706	31.5484	128
chr1	4481738	4483611	PotentialPeaks_H3K27Ac_peak_31	785	.	5.61578	81.2106	78.5407	645
chr1	4487200	4487489	PotentialPeaks_H3K27Ac_peak_32	120	.	2.68294	14.2492	12.0892	147
chr1	4509368	4509890	PotentialPeaks_H3K27Ac_peak_33	52	.	2.56854	7.21414	5.28312	440
chr1	4510049	4510772	PotentialPeaks_H3K27Ac_peak_34	146	.	3.78522	16.8998	14.6849	575
chr1	4526964	4527536	PotentialPeaks_H3K27Ac_peak_35	197	.	4.06794	22.0408	19.7454	118
chr1	4527864	4528438	PotentialPeaks_H3K27Ac_peak_36	286	.	4.92404	31.0797	28.6829	426
chr1	4528847	4529237	PotentialPeaks_H3K27Ac_peak_37	72	.	2.73625	9.27893	7.26157	64
chr1	4533987	4534688	PotentialPeaks_H3K27Ac_peak_38	70	.	2.83892	9.10511	7.09274	195
chr1	4561324	4562397	PotentialPeaks_H3K27Ac_peak_39	3652	.	15.3525	368.49	365.247	429
chr1	4587563	4588422	PotentialPeaks_H3K27Ac_peak_40	155	.	3.75043	17.7497	15.52	361
chr1	4588674	4589099	PotentialPeaks_H3K27Ac_peak_41	156	.	3.72186	17.845	15.6139	251
chr1	4631900	4632063	PotentialPeaks_H3K27Ac_peak_42	40	.	2.36576	5.90982	4.05058	43
chr1	4660036	4660413	PotentialPeaks_H3K27Ac_peak_43	75	.	2.70849	9.62134	7.59023	117
chr1	4660870	4661234	PotentialPeaks_H3K27Ac_peak_44	46	.	2.30025	6.58994	4.69572	227
chr1	4661588	4662470	PotentialPeaks_H3K27Ac_peak_45	98	.	2.94218	11.9947	9.89102	128
chr1	4662533	4662698	PotentialPeaks_H3K27Ac_peak_46	57	.	2.46076	7.68652	5.73333	74
chr1	4712351	4712693	PotentialPeaks_H3K27Ac_peak_47	72	.	2.63822	9.23272	7.21666	127
chr1	4713061	4713940	PotentialPeaks_H3K27Ac_peak_48	136	.	3.34358	15.8415	13.6472	350
chr1	4714211	4714407	PotentialPeaks_H3K27Ac_peak_49	45	.	2.3005	6.47111	4.58149	125
chr1	4714553	4715075	PotentialPeaks_H3K27Ac_peak_50	269	.	4.55374	29.3733	26.9927	132
chr1	4729340	4729557	PotentialPeaks_H3K27Ac_peak_51	36	.	2.29817	5.49817	3.66539	123
chr1	4775331	4776342	PotentialPeaks_H3K27Ac_peak_52	6875	.	23.0187	691.232	687.523	320
chr1	4797493	4798461	PotentialPeaks_H3K27Ac_peak_53	7277	.	21.7243	731.544	727.779	598
chr1	4847101	4847678	PotentialPeaks_H3K27Ac_peak_54	606	.	4.32288	63.2914	60.6935	233
chr1	4847789	4848690	PotentialPeaks_H3K27Ac_peak_55	4559	.	13.4529	459.308	455.929	428
chr1	4960025	4960836	PotentialPeaks_H3K27Ac_peak_56	129	.	3.58244	15.0903	12.9108	339
chr1	4960927	4961394	PotentialPeaks_H3K27Ac_peak_57	57	.	2.63614	7.67112	5.71846	164
chr1	5008294	5008503	PotentialPeaks_H3K27Ac_peak_58	41	.	1.98085	6.01946	4.15584	59
chr1	5008587	5010214	PotentialPeaks_H3K27Ac_peak_59	518	.	4.45347	54.3955	51.8402	1099
chr1	5013386	5013975	PotentialPeaks_H3K27Ac_peak_60	768	.	5.48689	79.5139	76.8502	292
chr1	5014248	5014568	PotentialPeaks_H3K27Ac_peak_61	128	.	2.68651	15.0738	12.8963	63
chr1	5072839	5073776	PotentialPeaks_H3K27Ac_peak_62	5666	.	24.4755	570.222	566.683	510
chr1	5221931	5222142	PotentialPeaks_H3K27Ac_peak_63	49	.	2.40863	6.88416	4.97165	120
chr1	5222246	5222585	PotentialPeaks_H3K27Ac_peak_64	71	.	2.70476	9.11547	7.10277	120
chr1	5223106	5223747	PotentialPeaks_H3K27Ac_peak_65	180	.	3.96591	20.3154	18.0441	457
chr1	5276022	5276464	PotentialPeaks_H3K27Ac_peak_66	40	.	2.36576	5.90982	4.05058	130
chr1	6065992	6066339	PotentialPeaks_H3K27Ac_peak_67	75	.	2.90651	9.60334	7.57276	292
chr1	6066705	6067209	PotentialPeaks_H3K27Ac_peak_68	90	.	3.10929	11.1557	9.07465	379
chr1	6204266	6205482	PotentialPeaks_H3K27Ac_peak_69	11054	.	16.7907	1109.67	1105.41	615
chr1	6260164	6260375	PotentialPeaks_H3K27Ac_peak_70	29	.	2.16298	4.71138	2.93583	85
chr1	6267198	6267364	PotentialPeaks_H3K27Ac_peak_71	66	.	2.77132	8.61684	6.62356	110
chr1	6270935	6271186	PotentialPeaks_H3K27Ac_peak_72	32	.	2.23058	5.09859	3.29362	34
chr1	6349276	6349510	PotentialPeaks_H3K27Ac_peak_73	123	.	3.51485	14.503	12.3362	142
chr1	6372953	6373368	PotentialPeaks_H3K27Ac_peak_74	1228	.	11.8964	125.665	122.864	180
chr1	6396769	6396919	PotentialPeaks_H3K27Ac_peak_75	25	.	2.09539	4.33687	2.59236	71
chr1	6438216	6438402	PotentialPeaks_H3K27Ac_peak_76	52	.	2.56854	7.21414	5.28312	123
chr1	6444246	6444400	PotentialPeaks_H3K27Ac_peak_77	66	.	2.77132	8.61684	6.62356	36
chr1	6473225	6473445	PotentialPeaks_H3K27Ac_peak_78	40	.	2.36576	5.90982	4.05058	106
chr1	6596336	6596552	PotentialPeaks_H3K27Ac_peak_79	25	.	2.09539	4.33687	2.59236	16
chr1	6597329	6597503	PotentialPeaks_H3K27Ac_peak_80	29	.	2.16298	4.71138	2.93583	105
chr1	6646904	6647129	PotentialPeaks_H3K27Ac_peak_81	46	.	2.4255	6.56624	4.67296	93
chr1	6647249	6647557	PotentialPeaks_H3K27Ac_peak_82	119	.	3.39272	14.1001	11.943	211
chr1	6648039	6648834	PotentialPeaks_H3K27Ac_peak_83	411	.	6.15371	43.6344	41.1411	389
chr1	6649000	6649319	PotentialPeaks_H3K27Ac_peak_84	149	.	3.77994	17.1328	14.9141	176
chr1	6649613	6649767	PotentialPeaks_H3K27Ac_peak_85	22	.	2.00951	3.90419	2.21217	35
chr1	6719208	6719859	PotentialPeaks_H3K27Ac_peak_86	410	.	3.9287	43.5061	41.0136	176
chr1	6723498	6724874	PotentialPeaks_H3K27Ac_peak_87	402	.	3.32274	42.7165	40.2292	445
chr1	6725027	6725417	PotentialPeaks_H3K27Ac_peak_88	227	.	2.80882	25.0441	22.7101	145
chr1	6725601	6725931	PotentialPeaks_H3K27Ac_peak_89	736	.	4.69599	76.3396	73.6876	130
chr1	6726006	6726178	PotentialPeaks_H3K27Ac_peak_90	165	.	2.54314	18.7917	16.544	93
chr1	6740711	6740914	PotentialPeaks_H3K27Ac_peak_91	48	.	2.36286	6.78612	4.87718	93
chr1	6741701	6741877	PotentialPeaks_H3K27Ac_peak_92	118	.	3.21492	13.9878	11.8328	65
chr1	6741939	6742459	PotentialPeaks_H3K27Ac_peak_93	347	.	5.20999	37.2211	34.773	84
chr1	6742513	6742820	PotentialPeaks_H3K27Ac_peak_94	114	.	2.96212	13.6059	11.4606	256
chr1	6747563	6747758	PotentialPeaks_H3K27Ac_peak_95	207	.	3.19786	23.0682	20.7588	113
chr1	6750539	6750946	PotentialPeaks_H3K27Ac_peak_96	621	.	5.34025	64.7772	62.1727	126
chr1	6751188	6751887	PotentialPeaks_H3K27Ac_peak_97	445	.	4.36024	47.059	44.5444	311
chr1	6756934	6757766	PotentialPeaks_H3K27Ac_peak_98	646	.	5.33034	67.29	64.6745	446
chr1	6758203	6759150	PotentialPeaks_H3K27Ac_peak_99	339	.	3.97208	36.3531	33.9118	379
chr1	6779164	6779504	PotentialPeaks_H3K27Ac_peak_100	51	.	2.44321	7.05316	5.13447	217
chr1	6779585	6779872	PotentialPeaks_H3K27Ac_peak_101	69	.	2.70831	8.9717	6.96778	189
chr1	6780275	6780508	PotentialPeaks_H3K27Ac_peak_102	67	.	2.6696	8.77375	6.77569	94
chr1	6780567	6780884	PotentialPeaks_H3K27Ac_peak_103	52	.	2.46757	7.17174	5.24883	121
chr1	6781048	6781517	PotentialPeaks_H3K27Ac_peak_104	126	.	3.35452	14.7915	12.6192	90
chr1	6783159	6783330	PotentialPeaks_H3K27Ac_peak_105	43	.	2.3303	6.25178	4.37879	37
chr1	6789395	6790207	PotentialPeaks_H3K27Ac_peak_106	147	.	3.60454	16.9235	14.7082	404
chr1	6790827	6790995	PotentialPeaks_H3K27Ac_peak_107	100	.	3.00992	12.1999	10.0916	77
chr1	6791106	6791397	PotentialPeaks_H3K27Ac_peak_108	137	.	3.35447	15.9085	13.713	149
chr1	6931491	6931810	PotentialPeaks_H3K27Ac_peak_109	66	.	2.77132	8.61684	6.62356	124
chr1	6932662	6932838	PotentialPeaks_H3K27Ac_peak_110	52	.	2.56854	7.21414	5.28312	121
chr1	7077969	7078863	PotentialPeaks_H3K27Ac_peak_111	13101	.	17.3688	1314.64	1310.13	688
chr1	7079043	7079731	PotentialPeaks_H3K27Ac_peak_112	4685	.	9.02105	471.977	468.58	211
chr1	7095123	7095511	PotentialPeaks_H3K27Ac_peak_113	36	.	2.29817	5.49817	3.66539	273
chr1	7101626	7101813	PotentialPeaks_H3K27Ac_peak_114	70	.	2.83892	9.10511	7.09274	113
chr1	7102143	7102579	PotentialPeaks_H3K27Ac_peak_115	85	.	3.0417	10.6288	8.56398	226
chr1	7102984	7103371	PotentialPeaks_H3K27Ac_peak_116	70	.	2.83892	9.10511	7.09274	191
chr1	7128354	7128958	PotentialPeaks_H3K27Ac_peak_117	139	.	3.65164	16.1935	13.9931	491
chr1	7129346	7130115	PotentialPeaks_H3K27Ac_peak_118	215	.	4.37895	23.8786	21.5589	395
chr1	7138478	7138738	PotentialPeaks_H3K27Ac_peak_119	66	.	2.77132	8.61684	6.62356	118
chr1	7142517	7142688	PotentialPeaks_H3K27Ac_peak_120	32	.	2.12661	5.07323	3.28055	30
chr1	7143644	7143804	PotentialPeaks_H3K27Ac_peak_121	101	.	3.12319	12.236	10.125	96
chr1	7144200	7144461	PotentialPeaks_H3K27Ac_peak_122	70	.	2.76071	9.07031	7.06347	124
chr1	7144568	7144814	PotentialPeaks_H3K27Ac_peak_123	125	.	3.43144	14.7657	12.5939	109
chr1	7145183	7145556	PotentialPeaks_H3K27Ac_peak_124	88	.	2.98629	10.928	8.85565	118
chr1	7145649	7145995	PotentialPeaks_H3K27Ac_peak_125	76	.	2.84225	9.64777	7.61594	86
chr1	7299210	7299444	PotentialPeaks_H3K27Ac_peak_126	48	.	2.50095	6.76809	4.85978	140
chr1	7304134	7304294	PotentialPeaks_H3K27Ac_peak_127	73	.	2.74609	9.32983	7.31103	101
chr1	7387243	7387432	PotentialPeaks_H3K27Ac_peak_128	130	.	2.47017	15.2626	13.08	57
chr1	7387706	7388071	PotentialPeaks_H3K27Ac_peak_129	8161	.	21.6639	820.011	816.124	161
chr1	7388178	7388830	PotentialPeaks_H3K27Ac_peak_130	4219	.	13.8893	425.321	421.992	405
chr1	7488074	7488381	PotentialPeaks_H3K27Ac_peak_131	311	.	5.40746	33.5885	31.1693	160
chr1	7488888	7489166	PotentialPeaks_H3K27Ac_peak_132	252	.	4.80261	27.6079	25.2456	115
chr1	7489232	7489382	PotentialPeaks_H3K27Ac_peak_133	37	.	2.29807	5.61811	3.78025	128
chr1	8466976	8467159	PotentialPeaks_H3K27Ac_peak_134	140	.	3.71763	16.2889	14.0854	69
chr1	8808898	8809070	PotentialPeaks_H3K27Ac_peak_135	66	.	2.77132	8.61684	6.62356	48
chr1	8903415	8903719	PotentialPeaks_H3K27Ac_peak_136	52	.	2.56854	7.21414	5.28312	285
chr1	8905633	8905783	PotentialPeaks_H3K27Ac_peak_137	48	.	2.50095	6.76809	4.85978	51
chr1	8937698	8938519	PotentialPeaks_H3K27Ac_peak_138	535	.	7.23248	56.0721	53.5084	388
chr1	9288594	9290347	PotentialPeaks_H3K27Ac_peak_139	705	.	7.1183	73.1423	70.5028	682
chr1	9535015	9535250	PotentialPeaks_H3K27Ac_peak_140	101	.	2.4112	12.2675	10.155	149
chr1	9535482	9536352	PotentialPeaks_H3K27Ac_peak_141	3093	.	12.6677	312.502	309.348	177
chr1	9538172	9538781	PotentialPeaks_H3K27Ac_peak_142	186	.	2.96386	20.8839	18.6041	80
chr1	9553750	9554730	PotentialPeaks_H3K27Ac_peak_143	278	.	4.53475	30.2061	27.8175	557
chr1	9554806	9555481	PotentialPeaks_H3K27Ac_peak_144	186	.	3.69098	20.9555	18.6748	204
chr1	9559630	9560039	PotentialPeaks_H3K27Ac_peak_145	50	.	2.38918	6.91831	5.00457	92
chr1	9567678	9567837	PotentialPeaks_H3K27Ac_peak_146	79	.	2.80251	9.96338	7.92297	122
chr1	9568118	9568365	PotentialPeaks_H3K27Ac_peak_147	46	.	2.36453	6.54052	4.64817	180
chr1	9568531	9568812	PotentialPeaks_H3K27Ac_peak_148	180	.	3.87774	20.3358	18.0643	155
chr1	9569342	9569743	PotentialPeaks_H3K27Ac_peak_149	368	.	5.40409	39.2735	36.81	127
chr1	9573822	9574001	PotentialPeaks_H3K27Ac_peak_150	75	.	2.85792	9.54879	7.52375	70
chr1	9591065	9592909	PotentialPeaks_H3K27Ac_peak_151	605	.	6.241	63.1527	60.5554	568
chr1	9593120	9593289	PotentialPeaks_H3K27Ac_peak_152	66	.	2.38021	8.66823	6.67338	124
chr1	9599615	9599776	PotentialPeaks_H3K27Ac_peak_153	66	.	2.77132	8.61684	6.62356	67
chr1	9602096	9602612	PotentialPeaks_H3K27Ac_peak_154	112	.	3.37966	13.3529	11.2127	132
chr1	9609059	9609749	PotentialPeaks_H3K27Ac_peak_155	97	.	2.86024	11.8629	9.76223	554
chr1	9609916	9610727	PotentialPeaks_H3K27Ac_peak_156	155	.	3.40073	17.784	15.5538	135
chr1	9617341	9617556	PotentialPeaks_H3K27Ac_peak_157	60	.	2.25322	8.06536	6.0997	102
chr1	9619630	9619799	PotentialPeaks_H3K27Ac_peak_158	49	.	2.15742	6.88951	4.9768	92
chr1	9619968	9621054	PotentialPeaks_H3K27Ac_peak_159	190	.	3.42351	21.376	19.0899	788
chr1	9621142	9621461	PotentialPeaks_H3K27Ac_peak_160	88	.	2.56763	10.9025	8.83081	145
chr1	9628839	9629032	PotentialPeaks_H3K27Ac_peak_161	126	.	3.49378	14.8673	12.6937	100
chr1	9629177	9629674	PotentialPeaks_H3K27Ac_peak_162	62	.	2.68142	8.19576	6.22048	206
chr1	9638150	9638302	PotentialPeaks_H3K27Ac_peak_163	51	.	2.03944	7.05119	5.13268	80
chr1	9638575	9638942	PotentialPeaks_H3K27Ac_peak_164	341	.	3.96771	36.5823	34.1392	149
chr1	9639354	9639993	PotentialPeaks_H3K27Ac_peak_165	413	.	4.32252	43.8911	41.3962	187
chr1	9640048	9640243	PotentialPeaks_H3K27Ac_peak_166	38	.	1.89608	5.67574	3.83545	88
chr1	9640617	9640774	PotentialPeaks_H3K27Ac_peak_167	119	.	2.62854	14.0874	11.9305	135
chr1	9648531	9649944	PotentialPeaks_H3K27Ac_peak_168	176	.	3.64258	19.8769	17.6127	1142
chr1	9650918	9651111	PotentialPeaks_H3K27Ac_peak_169	51	.	2.35229	7.1095	5.18885	116
chr1	9689600	9690480	PotentialPeaks_H3K27Ac_peak_170	3492	.	12.7051	352.464	349.247	560
chr1	9690553	9691148	PotentialPeaks_H3K27Ac_peak_171	1452	.	7.47232	148.137	145.284	259
chr1	9737488	9738510	PotentialPeaks_H3K27Ac_peak_172	7082	.	18.1507	711.95	708.214	767
chr1	9787829	9788773	PotentialPeaks_H3K27Ac_peak_173	663	.	8.17879	68.943	66.3205	209
chr1	9838290	9838730	PotentialPeaks_H3K27Ac_peak_174	245	.	4.79912	26.9096	24.5542	233
chr1	9932957	9933259	PotentialPeaks_H3K27Ac_peak_175	74	.	1.84322	9.51594	7.49184	55
chr1	9933427	9934259	PotentialPeaks_H3K27Ac_peak_176	14562	.	23.0531	1460.96	1456.28	629
chr1	9958094	9958395	PotentialPeaks_H3K27Ac_peak_177	80	.	2.9741	10.1113	8.06329	204
chr1	10027576	10028298	PotentialPeaks_H3K27Ac_peak_178	31839	.	25.2353	3190.07	3183.99	544
chr1	10029848	10030296	PotentialPeaks_H3K27Ac_peak_179	8153	.	10.2419	819.26	815.375	175
chr1	10052972	10053126	PotentialPeaks_H3K27Ac_peak_180	85	.	3.0417	10.6288	8.56398	73
chr1	10105128	10105324	PotentialPeaks_H3K27Ac_peak_181	66	.	2.77132	8.61684	6.62356	94
chr1	10105614	10106109	PotentialPeaks_H3K27Ac_peak_182	184	.	4.19078	20.7204	18.4428	271
chr1	10106709	10107093	PotentialPeaks_H3K27Ac_peak_183	90	.	3.10929	11.1557	9.07465	109
chr1	10159612	10159912	PotentialPeaks_H3K27Ac_peak_184	95	.	3.17688	11.6917	9.59507	111
chr1	10160983	10161250	PotentialPeaks_H3K27Ac_peak_185	85	.	3.0417	10.6288	8.56398	121
chr1	10221948	10223530	PotentialPeaks_H3K27Ac_peak_186	7317	.	11.8331	735.483	731.712	1010
chr1	10237143	10237320	PotentialPeaks_H3K27Ac_peak_187	29	.	2.16298	4.71138	2.93583	143
chr1	10246737	10246962	PotentialPeaks_H3K27Ac_peak_188	52	.	2.56854	7.21414	5.28312	132
chr1	10247650	10247860	PotentialPeaks_H3K27Ac_peak_189	66	.	2.77132	8.61684	6.62356	132
chr1	10269228	10269383	PotentialPeaks_H3K27Ac_peak_190	48	.	2.50095	6.76809	4.85978	82
chr1	10274704	10275768	PotentialPeaks_H3K27Ac_peak_191	564	.	6.87137	58.9947	56.4167	770
chr1	10276610	10276901	PotentialPeaks_H3K27Ac_peak_192	69	.	2.69609	8.90935	6.90729	221
chr1	10276985	10277161	PotentialPeaks_H3K27Ac_peak_193	63	.	2.61261	8.32769	6.34829	101
chr1	10291032	10291188	PotentialPeaks_H3K27Ac_peak_194	57	.	2.63614	7.67112	5.71846	98
chr1	10368356	10368674	PotentialPeaks_H3K27Ac_peak_195	70	.	2.83892	9.10511	7.09274	209
chr1	10393716	10394009	PotentialPeaks_H3K27Ac_peak_196	36	.	2.29817	5.49817	3.66539	107
chr1	10467523	10467673	PotentialPeaks_H3K27Ac_peak_197	16	.	1.89261	3.29314	1.65376	60
chr1	10468036	10468283	PotentialPeaks_H3K27Ac_peak_198	36	.	2.29817	5.49817	3.66539	56
chr1	10579009	10579221	PotentialPeaks_H3K27Ac_peak_199	52	.	2.56854	7.21414	5.28312	126
chr1	10586310	10586582	PotentialPeaks_H3K27Ac_peak_200	97	.	2.53711	11.8378	9.73772	129
chr1	10586840	10587303	PotentialPeaks_H3K27Ac_peak_201	922	.	6.95654	94.9323	92.2167	166
chr1	10587851	10588101	PotentialPeaks_H3K27Ac_peak_202	100	.	2.59783	12.1664	10.0588	134
chr1	10611351	10611663	PotentialPeaks_H3K27Ac_peak_203	101	.	3.24448	12.2367	10.125	121
chr1	10627156	10627352	PotentialPeaks_H3K27Ac_peak_204	32	.	2.23058	5.09859	3.29362	97
chr1	10690986	10691202	PotentialPeaks_H3K27Ac_peak_205	32	.	2.23058	5.09859	3.29362	143
chr1	10709942	10710102	PotentialPeaks_H3K27Ac_peak_206	52	.	2.56854	7.21414	5.28312	98
chr1	10747695	10747846	PotentialPeaks_H3K27Ac_peak_207	112	.	3.37966	13.3529	11.2127	49
chr1	10842038	10842223	PotentialPeaks_H3K27Ac_peak_208	19	.	1.9602	3.62739	1.95085	124
chr1	10843856	10844035	PotentialPeaks_H3K27Ac_peak_209	51	.	2.50619	7.07523	5.15581	125
chr1	10844265	10844697	PotentialPeaks_H3K27Ac_peak_210	162	.	3.8782	18.4579	16.2162	148
chr1	10845193	10845343	PotentialPeaks_H3K27Ac_peak_211	68	.	2.77414	8.79896	6.80016	115
chr1	10847076	10847338	PotentialPeaks_H3K27Ac_peak_212	106	.	3.31207	12.7905	10.6643	132
chr1	10983519	10984193	PotentialPeaks_H3K27Ac_peak_213	2014	.	14.4922	204.389	201.421	245
chr1	11015537	11015898	PotentialPeaks_H3K27Ac_peak_214	36	.	2.29817	5.49817	3.66539	141
chr1	11023598	11023881	PotentialPeaks_H3K27Ac_peak_215	75	.	2.90651	9.60334	7.57276	142
chr1	11128005	11128169	PotentialPeaks_H3K27Ac_peak_216	95	.	3.17688	11.6917	9.59507	44
chr1	11142783	11142945	PotentialPeaks_H3K27Ac_peak_217	36	.	2.29817	5.49817	3.66539	85
chr1	11170227	11170412	PotentialPeaks_H3K27Ac_peak_218	40	.	2.36576	5.90982	4.05058	92
chr1	11262837	11263025	PotentialPeaks_H3K27Ac_peak_219	93	.	3.08156	11.4172	9.32987	145
chr1	11264543	11264790	PotentialPeaks_H3K27Ac_peak_220	111	.	3.17216	13.3243	11.1869	116
chr1	11267079	11267415	PotentialPeaks_H3K27Ac_peak_221	74	.	2.76849	9.44544	7.42337	80
chr1	11268090	11268489	PotentialPeaks_H3K27Ac_peak_222	58	.	2.62118	7.75682	5.80127	226
chr1	11403927	11404675	PotentialPeaks_H3K27Ac_peak_223	589	.	7.63804	61.4971	58.9074	540
chr1	11648237	11648647	PotentialPeaks_H3K27Ac_peak_224	75	.	2.90651	9.60334	7.57276	122
chr1	11989841	11990162	PotentialPeaks_H3K27Ac_peak_225	82	.	2.90233	10.3094	8.25616	133
chr1	11990435	11991148	PotentialPeaks_H3K27Ac_peak_226	102	.	3.18227	12.3423	10.2282	77
chr1	12000006	12000186	PotentialPeaks_H3K27Ac_peak_227	36	.	2.29817	5.49817	3.66539	105
chr1	12016139	12016289	PotentialPeaks_H3K27Ac_peak_228	36	.	2.29817	5.49817	3.66539	133
chr1	12044923	12045121	PotentialPeaks_H3K27Ac_peak_229	32	.	2.23058	5.09859	3.29362	57
chr1	12046105	12046583	PotentialPeaks_H3K27Ac_peak_230	87	.	3.04137	10.8221	8.75244	303
chr1	12046634	12046817	PotentialPeaks_H3K27Ac_peak_231	63	.	2.70271	8.29601	6.3176	48
chr1	12051002	12051400	PotentialPeaks_H3K27Ac_peak_232	85	.	3.0417	10.6288	8.56398	146
chr1	12388028	12388418	PotentialPeaks_H3K27Ac_peak_233	129	.	3.58244	15.0903	12.9108	231
chr1	12388657	12389157	PotentialPeaks_H3K27Ac_peak_234	311	.	5.40746	33.5885	31.1693	383
chr1	12479382	12479649	PotentialPeaks_H3K27Ac_peak_235	75	.	2.90651	9.60334	7.57276	137
chr1	12566961	12567861	PotentialPeaks_H3K27Ac_peak_236	546	.	6.09202	57.2182	54.6488	446
chr1	12573076	12573408	PotentialPeaks_H3K27Ac_peak_237	57	.	2.58469	7.73644	5.78158	213
chr1	12626974	12627206	PotentialPeaks_H3K27Ac_peak_238	70	.	2.83892	9.10511	7.09274	118
chr1	12660808	12661150	PotentialPeaks_H3K27Ac_peak_239	134	.	3.65004	15.6857	13.4939	91
chr1	12679558	12679760	PotentialPeaks_H3K27Ac_peak_240	30	.	2.1689	4.84211	3.06043	73
chr1	12682462	12682741	PotentialPeaks_H3K27Ac_peak_241	46	.	2.40161	6.58787	4.69373	108
chr1	12683056	12683615	PotentialPeaks_H3K27Ac_peak_242	142	.	3.57031	16.4842	14.2774	331
chr1	12701009	12701161	PotentialPeaks_H3K27Ac_peak_243	66	.	2.74682	8.66893	6.67404	107
chr1	12701365	12701772	PotentialPeaks_H3K27Ac_peak_244	66	.	2.74142	8.64316	6.64905	230
chr1	12707978	12709198	PotentialPeaks_H3K27Ac_peak_245	320	.	4.7207	34.4731	32.0466	136
chr1	12724859	12725137	PotentialPeaks_H3K27Ac_peak_246	44	.	2.43336	6.33322	4.44884	193
chr1	12782001	12782228	PotentialPeaks_H3K27Ac_peak_247	52	.	2.56854	7.21414	5.28312	143
chr1	12785532	12785734	PotentialPeaks_H3K27Ac_peak_248	75	.	2.90651	9.60334	7.57276	76
chr1	12801058	12801306	PotentialPeaks_H3K27Ac_peak_249	59	.	2.48475	7.95239	5.99042	125
chr1	12801549	12802073	PotentialPeaks_H3K27Ac_peak_250	81	.	2.76157	10.247	8.19535	133
chr1	12824539	12824831	PotentialPeaks_H3K27Ac_peak_251	48	.	2.27875	6.71389	4.81497	72
chr1	12825102	12826824	PotentialPeaks_H3K27Ac_peak_252	221	.	3.85876	24.4899	22.1626	1533
chr1	12867940	12868174	PotentialPeaks_H3K27Ac_peak_253	129	.	3.58244	15.0903	12.9108	145
chr1	12980633	12981246	PotentialPeaks_H3K27Ac_peak_254	815	.	3.9198	84.2618	81.5812	298
chr1	12981476	12982945	PotentialPeaks_H3K27Ac_peak_255	3921	.	8.9551	395.41	392.126	1183
chr1	12994432	12994600	PotentialPeaks_H3K27Ac_peak_256	75	.	2.90651	9.60334	7.57276	82
chr1	12995018	12996073	PotentialPeaks_H3K27Ac_peak_257	304	.	5.33987	32.824	30.4114	326
chr1	13001105	13001299	PotentialPeaks_H3K27Ac_peak_258	25	.	2.09539	4.33687	2.59236	81
chr1	13124422	13124572	PotentialPeaks_H3K27Ac_peak_259	36	.	2.29817	5.49817	3.66539	85
chr1	13124726	13124876	PotentialPeaks_H3K27Ac_peak_260	52	.	2.56854	7.21414	5.28312	18
chr1	13135705	13135962	PotentialPeaks_H3K27Ac_peak_261	52	.	2.56854	7.21414	5.28312	118
chr1	13163931	13164081	PotentialPeaks_H3K27Ac_peak_262	36	.	2.29817	5.49817	3.66539	51
chr1	13164414	13164736	PotentialPeaks_H3K27Ac_peak_263	66	.	2.77132	8.61684	6.62356	187
chr1	13173268	13173528	PotentialPeaks_H3K27Ac_peak_264	36	.	2.24392	5.49766	3.66539	178
chr1	13173748	13174062	PotentialPeaks_H3K27Ac_peak_265	150	.	3.5473	17.3157	15.0942	197
chr1	13178283	13178539	PotentialPeaks_H3K27Ac_peak_266	118	.	3.14855	14.0084	11.853	140
chr1	13178705	13179451	PotentialPeaks_H3K27Ac_peak_267	140	.	3.52216	16.21	14.0093	493
chr1	13185484	13185814	PotentialPeaks_H3K27Ac_peak_268	129	.	3.58244	15.0903	12.9108	148
chr1	13191770	13191939	PotentialPeaks_H3K27Ac_peak_269	52	.	2.56854	7.21414	5.28312	51
chr1	13206375	13206762	PotentialPeaks_H3K27Ac_peak_270	134	.	3.65004	15.6857	13.4939	239
chr1	13216324	13216519	PotentialPeaks_H3K27Ac_peak_271	40	.	2.36576	5.90982	4.05058	94
chr1	13218576	13218855	PotentialPeaks_H3K27Ac_peak_272	37	.	2.19781	5.61985	3.78192	159
chr1	13221110	13221393	PotentialPeaks_H3K27Ac_peak_273	90	.	2.88151	11.0984	9.02177	76
chr1	13221459	13221790	PotentialPeaks_H3K27Ac_peak_274	116	.	3.21865	13.7984	11.6492	99
chr1	13228495	13228759	PotentialPeaks_H3K27Ac_peak_275	61	.	2.70373	8.13877	6.16537	121
chr1	13234613	13235548	PotentialPeaks_H3K27Ac_peak_276	104	.	3.18787	12.5799	10.4606	291
chr1	13235984	13236230	PotentialPeaks_H3K27Ac_peak_277	83	.	2.92134	10.407	8.35126	117
chr1	13242055	13242243	PotentialPeaks_H3K27Ac_peak_278	44	.	2.42118	6.2801	4.40601	101
chr1	13244039	13244239	PotentialPeaks_H3K27Ac_peak_279	22	.	2.0238	3.95986	2.26388	177
chr1	13245928	13246234	PotentialPeaks_H3K27Ac_peak_280	45	.	2.39103	6.40824	4.52101	97
chr1	13249515	13249673	PotentialPeaks_H3K27Ac_peak_281	66	.	2.77132	8.61684	6.62356	36
chr1	13256835	13256999	PotentialPeaks_H3K27Ac_peak_282	52	.	2.56854	7.21414	5.28312	92
chr1	13263226	13263442	PotentialPeaks_H3K27Ac_peak_283	77	.	2.87784	9.82505	7.78844	125
chr1	13265177	13265334	PotentialPeaks_H3K27Ac_peak_284	41	.	2.35674	5.99757	4.13483	76
chr1	13279993	13280463	PotentialPeaks_H3K27Ac_peak_285	138	.	3.11273	16.001	13.8039	337
chr1	13280841	13281244	PotentialPeaks_H3K27Ac_peak_286	157	.	3.24595	18.0088	15.7751	298
chr1	13281659	13281964	PotentialPeaks_H3K27Ac_peak_287	156	.	3.23331	17.9145	15.6823	135
chr1	13293502	13293763	PotentialPeaks_H3K27Ac_peak_288	42	.	2.27931	6.12769	4.2597	175
chr1	13293876	13294191	PotentialPeaks_H3K27Ac_peak_289	30	.	2.06408	4.78372	3.00477	230
chr1	13298629	13298806	PotentialPeaks_H3K27Ac_peak_290	42	.	2.35263	6.10548	4.23838	61
chr1	13304348	13304547	PotentialPeaks_H3K27Ac_peak_291	77	.	2.80579	9.80899	7.77281	109
chr1	13304632	13305197	PotentialPeaks_H3K27Ac_peak_292	132	.	3.41943	15.3884	13.2036	365
chr1	13322543	13322732	PotentialPeaks_H3K27Ac_peak_293	61	.	2.70373	8.13877	6.16537	88
chr1	13323442	13323713	PotentialPeaks_H3K27Ac_peak_294	36	.	2.29817	5.49817	3.66539	50
chr1	13324054	13324350	PotentialPeaks_H3K27Ac_peak_295	36	.	2.29817	5.49817	3.66539	58
chr1	13350971	13351378	PotentialPeaks_H3K27Ac_peak_296	70	.	2.83892	9.10511	7.09274	81
chr1	13357138	13357374	PotentialPeaks_H3K27Ac_peak_297	31	.	2.14139	4.93451	3.14847	120
chr1	13362714	13364757	PotentialPeaks_H3K27Ac_peak_298	8721	.	8.61869	876.141	872.18	895
chr1	13458142	13458383	PotentialPeaks_H3K27Ac_peak_299	66	.	2.77132	8.61684	6.62356	139
chr1	13579163	13579979	PotentialPeaks_H3K27Ac_peak_300	7614	.	18.0613	765.264	761.452	568
chr1	13650019	13651052	PotentialPeaks_H3K27Ac_peak_301	3954	.	17.8408	398.772	395.484	406
chr1	13777322	13777502	PotentialPeaks_H3K27Ac_peak_302	84	.	2.86846	10.4907	8.43283	116
chr1	13777607	13777763	PotentialPeaks_H3K27Ac_peak_303	46	.	2.3751	6.59143	4.69714	49
chr1	13777826	13778368	PotentialPeaks_H3K27Ac_peak_304	157	.	3.73903	17.9429	15.7103	194
chr1	13778963	13779354	PotentialPeaks_H3K27Ac_peak_305	54	.	2.5361	7.35832	5.42237	157
chr1	13779586	13780035	PotentialPeaks_H3K27Ac_peak_306	174	.	4.00747	19.7188	17.4568	154
chr1	13789433	13789585	PotentialPeaks_H3K27Ac_peak_307	32	.	2.23058	5.09859	3.29362	22
chr1	13798193	13798452	PotentialPeaks_H3K27Ac_peak_308	66	.	2.77132	8.61684	6.62356	119
chr1	13824421	13824636	PotentialPeaks_H3K27Ac_peak_309	52	.	2.56854	7.21414	5.28312	79
chr1	13825227	13825580	PotentialPeaks_H3K27Ac_peak_310	80	.	2.9741	10.1113	8.06329	254
chr1	13851466	13851781	PotentialPeaks_H3K27Ac_peak_311	80	.	2.9741	10.1113	8.06329	255
chr1	13894081	13894273	PotentialPeaks_H3K27Ac_peak_312	75	.	2.90651	9.60334	7.57276	50
chr1	13980555	13980843	PotentialPeaks_H3K27Ac_peak_313	44	.	2.43336	6.33322	4.44884	113
chr1	13983820	13983974	PotentialPeaks_H3K27Ac_peak_314	48	.	2.50095	6.76809	4.85978	95
chr1	13990903	13991077	PotentialPeaks_H3K27Ac_peak_315	32	.	2.23058	5.09859	3.29362	153
chr1	13991707	13991895	PotentialPeaks_H3K27Ac_peak_316	48	.	2.50095	6.76809	4.85978	81
chr1	13992255	13992460	PotentialPeaks_H3K27Ac_peak_317	75	.	2.90651	9.60334	7.57276	84
chr1	14043770	14043925	PotentialPeaks_H3K27Ac_peak_318	25	.	2.09539	4.33687	2.59236	40
chr1	14044872	14045049	PotentialPeaks_H3K27Ac_peak_319	80	.	2.9741	10.1113	8.06329	52
chr1	14087713	14088248	PotentialPeaks_H3K27Ac_peak_320	57	.	2.63614	7.67112	5.71846	396
chr1	14088547	14088706	PotentialPeaks_H3K27Ac_peak_321	48	.	2.50095	6.76809	4.85978	50
chr1	14090019	14090169	PotentialPeaks_H3K27Ac_peak_322	40	.	2.36576	5.90982	4.05058	62
chr1	14098392	14098565	PotentialPeaks_H3K27Ac_peak_323	52	.	2.56854	7.21414	5.28312	110
chr1	14099243	14099500	PotentialPeaks_H3K27Ac_peak_324	75	.	2.90651	9.60334	7.57276	130
chr1	14126097	14127080	PotentialPeaks_H3K27Ac_peak_325	174	.	3.51414	19.7272	17.4651	549
chr1	14127141	14127331	PotentialPeaks_H3K27Ac_peak_326	89	.	2.70786	11.0744	8.99832	105
chr1	14156065	14156304	PotentialPeaks_H3K27Ac_peak_327	79	.	2.69487	10.0283	7.9861	99
chr1	14156616	14157007	PotentialPeaks_H3K27Ac_peak_328	128	.	3.21061	15.0141	12.8377	211
chr1	14170315	14170853	PotentialPeaks_H3K27Ac_peak_329	135	.	2.97757	15.776	13.5828	143
chr1	14170963	14171284	PotentialPeaks_H3K27Ac_peak_330	179	.	3.25642	20.2268	17.9569	184
chr1	14171383	14171698	PotentialPeaks_H3K27Ac_peak_331	224	.	3.52562	24.8099	22.4783	191
chr1	14171803	14172213	PotentialPeaks_H3K27Ac_peak_332	231	.	3.51706	25.4455	23.107	288
chr1	14182382	14182877	PotentialPeaks_H3K27Ac_peak_333	79	.	2.75003	10.0154	7.97359	321
chr1	14183193	14184040	PotentialPeaks_H3K27Ac_peak_334	88	.	2.8553	10.95	8.87706	307
chr1	14209989	14210233	PotentialPeaks_H3K27Ac_peak_335	42	.	2.27346	6.09919	4.23236	44
chr1	14210371	14210521	PotentialPeaks_H3K27Ac_peak_336	60	.	2.5146	7.96986	6.00735	63
chr1	14210652	14210856	PotentialPeaks_H3K27Ac_peak_337	120	.	3.22476	14.2567	12.0965	105
chr1	14211095	14211426	PotentialPeaks_H3K27Ac_peak_338	85	.	2.79295	10.5945	8.53382	45
chr1	14247509	14247697	PotentialPeaks_H3K27Ac_peak_339	52	.	2.56854	7.21414	5.28312	78
chr1	14266139	14266361	PotentialPeaks_H3K27Ac_peak_340	40	.	2.36576	5.90982	4.05058	90
chr1	14281666	14281829	PotentialPeaks_H3K27Ac_peak_341	54	.	2.56324	7.33819	5.40287	102
chr1	14282571	14283012	PotentialPeaks_H3K27Ac_peak_342	32	.	2.19125	5.04426	3.25296	254
chr1	14292894	14293342	PotentialPeaks_H3K27Ac_peak_343	101	.	2.95052	12.2295	10.1205	202
chr1	14299061	14299211	PotentialPeaks_H3K27Ac_peak_344	33	.	1.63465	5.16862	3.36059	60
chr1	14299515	14300487	PotentialPeaks_H3K27Ac_peak_345	5167	.	13.5143	520.241	516.774	488
chr1	14340528	14340815	PotentialPeaks_H3K27Ac_peak_346	52	.	2.56854	7.21414	5.28312	34
chr1	14409733	14409958	PotentialPeaks_H3K27Ac_peak_347	40	.	2.36576	5.90982	4.05058	89
chr1	14422198	14422350	PotentialPeaks_H3K27Ac_peak_348	70	.	2.83892	9.10511	7.09274	51
chr1	14455137	14455527	PotentialPeaks_H3K27Ac_peak_349	61	.	2.70373	8.13877	6.16537	168
chr1	14459547	14459744	PotentialPeaks_H3K27Ac_peak_350	66	.	2.73873	8.63031	6.63661	105
chr1	14461268	14461868	PotentialPeaks_H3K27Ac_peak_351	101	.	3.24448	12.2367	10.125	268
chr1	14462306	14462465	PotentialPeaks_H3K27Ac_peak_352	61	.	2.70373	8.13877	6.16537	101
chr1	14475787	14476117	PotentialPeaks_H3K27Ac_peak_353	32	.	2.23058	5.09859	3.29362	209
chr1	14477644	14477822	PotentialPeaks_H3K27Ac_peak_354	45	.	2.3933	6.41866	4.53104	109
chr1	14477874	14478138	PotentialPeaks_H3K27Ac_peak_355	116	.	3.33486	13.7921	11.6431	125
chr1	14478887	14479066	PotentialPeaks_H3K27Ac_peak_356	63	.	2.63571	8.28964	6.31143	84
chr1	14496461	14497431	PotentialPeaks_H3K27Ac_peak_357	331	.	5.30335	35.6048	33.1693	431
chr1	14502676	14503299	PotentialPeaks_H3K27Ac_peak_358	112	.	3.35193	13.4364	11.2945	489
chr1	14503405	14503793	PotentialPeaks_H3K27Ac_peak_359	297	.	5.21803	32.1232	29.7167	189
chr1	14504124	14504571	PotentialPeaks_H3K27Ac_peak_360	108	.	3.30913	12.9955	10.8649	356
chr1	14554613	14554779	PotentialPeaks_H3K27Ac_peak_361	52	.	2.56854	7.21414	5.28312	84
chr1	14560188	14560490	PotentialPeaks_H3K27Ac_peak_362	48	.	2.50095	6.76809	4.85978	123
chr1	14561342	14561508	PotentialPeaks_H3K27Ac_peak_363	61	.	2.70373	8.13877	6.16537	135
chr1	14611524	14611700	PotentialPeaks_H3K27Ac_peak_364	57	.	2.63614	7.67112	5.71846	128
chr1	14616854	14617083	PotentialPeaks_H3K27Ac_peak_365	87	.	2.95858	10.7843	8.71558	111
chr1	14617155	14617399	PotentialPeaks_H3K27Ac_peak_366	39	.	2.27424	5.75031	3.90686	36
chr1	14621068	14621306	PotentialPeaks_H3K27Ac_peak_367	32	.	2.111	5.10119	3.29607	114
chr1	14626413	14626563	PotentialPeaks_H3K27Ac_peak_368	34	.	2.2547	5.31428	3.49973	96
chr1	14745185	14746017	PotentialPeaks_H3K27Ac_peak_369	465	.	6.69173	49.066	46.5396	591
chr1	14832602	14833205	PotentialPeaks_H3K27Ac_peak_370	75	.	2.90651	9.60334	7.57276	189
chr1	15276262	15277636	PotentialPeaks_H3K27Ac_peak_371	2094	.	10.2572	212.48	209.496	871
chr1	15338574	15338756	PotentialPeaks_H3K27Ac_peak_372	48	.	2.50095	6.76809	4.85978	142
chr1	15338960	15339175	PotentialPeaks_H3K27Ac_peak_373	75	.	2.90651	9.60334	7.57276	127
chr1	15339584	15339735	PotentialPeaks_H3K27Ac_peak_374	61	.	2.70373	8.13877	6.16537	103
chr1	15398111	15398270	PotentialPeaks_H3K27Ac_peak_375	36	.	2.29817	5.49817	3.66539	110
chr1	15436577	15436803	PotentialPeaks_H3K27Ac_peak_376	40	.	2.36576	5.90982	4.05058	96
chr1	15437225	15437377	PotentialPeaks_H3K27Ac_peak_377	49	.	2.46798	6.89795	4.98492	39
chr1	15441493	15442011	PotentialPeaks_H3K27Ac_peak_378	128	.	3.31926	15.0308	12.8541	136
chr1	15443892	15444112	PotentialPeaks_H3K27Ac_peak_379	33	.	2.13585	5.1159	3.31017	83
chr1	15600139	15600367	PotentialPeaks_H3K27Ac_peak_380	61	.	2.70373	8.13877	6.16537	134
chr1	15600615	15600765	PotentialPeaks_H3K27Ac_peak_381	36	.	2.29817	5.49817	3.66539	23
chr1	15601232	15601401	PotentialPeaks_H3K27Ac_peak_382	25	.	2.09539	4.33687	2.59236	128
chr1	15618330	15618934	PotentialPeaks_H3K27Ac_peak_383	90	.	3.10929	11.1557	9.07465	351
chr1	15622061	15622496	PotentialPeaks_H3K27Ac_peak_384	73	.	2.72734	9.39682	7.37614	211
chr1	15626410	15626560	PotentialPeaks_H3K27Ac_peak_385	50	.	2.35375	6.99166	5.07523	14
chr1	15627013	15627406	PotentialPeaks_H3K27Ac_peak_386	182	.	3.82993	20.5738	18.2991	138
chr1	15627687	15628213	PotentialPeaks_H3K27Ac_peak_387	136	.	3.50022	15.8478	13.6533	225
chr1	15633610	15633843	PotentialPeaks_H3K27Ac_peak_388	79	.	2.69067	10.0038	7.96235	61
chr1	15634022	15634670	PotentialPeaks_H3K27Ac_peak_389	116	.	3.08061	13.7917	11.6427	553
chr1	15635042	15635394	PotentialPeaks_H3K27Ac_peak_390	200	.	3.71177	22.3698	20.0695	249
chr1	15635697	15635921	PotentialPeaks_H3K27Ac_peak_391	280	.	4.19074	30.4094	28.019	91
chr1	15639913	15640199	PotentialPeaks_H3K27Ac_peak_392	122	.	3.00529	14.464	12.2998	146
chr1	15640305	15640548	PotentialPeaks_H3K27Ac_peak_393	78	.	2.63958	9.86034	7.82274	161
chr1	15641156	15641436	PotentialPeaks_H3K27Ac_peak_394	85	.	2.83082	10.6366	8.57154	174
chr1	15642509	15642728	PotentialPeaks_H3K27Ac_peak_395	46	.	2.31194	6.52908	4.63723	81
chr1	15653427	15653902	PotentialPeaks_H3K27Ac_peak_396	257	.	4.76884	28.0885	25.721	204
chr1	15654850	15655015	PotentialPeaks_H3K27Ac_peak_397	73	.	2.86585	9.40951	7.38847	96
chr1	15655155	15655344	PotentialPeaks_H3K27Ac_peak_398	85	.	3.0417	10.6288	8.56398	99
chr1	15673403	15673663	PotentialPeaks_H3K27Ac_peak_399	25	.	2.09539	4.33687	2.59236	86
chr1	15795112	15795539	PotentialPeaks_H3K27Ac_peak_400	469	.	3.44964	49.509	46.9802	299
chr1	15795681	15796508	PotentialPeaks_H3K27Ac_peak_401	11193	.	20.7778	1123.67	1119.39	217
chr1	15873782	15873932	PotentialPeaks_H3K27Ac_peak_402	52	.	2.56854	7.21414	5.28312	74
chr1	15882599	15882931	PotentialPeaks_H3K27Ac_peak_403	61	.	2.70373	8.13877	6.16537	130
chr1	15903151	15903401	PotentialPeaks_H3K27Ac_peak_404	32	.	2.23058	5.09859	3.29362	145
chr1	15903676	15903848	PotentialPeaks_H3K27Ac_peak_405	70	.	2.83892	9.10511	7.09274	47
chr1	15910712	15910898	PotentialPeaks_H3K27Ac_peak_406	57	.	2.63614	7.67112	5.71846	49
chr1	15915598	15915755	PotentialPeaks_H3K27Ac_peak_407	48	.	2.50095	6.76809	4.85978	108
chr1	15916572	15916803	PotentialPeaks_H3K27Ac_peak_408	66	.	2.77132	8.61684	6.62356	93
chr1	15925831	15926165	PotentialPeaks_H3K27Ac_peak_409	90	.	3.10929	11.1557	9.07465	139
chr1	15926351	15926857	PotentialPeaks_H3K27Ac_peak_410	66	.	2.77132	8.61684	6.62356	143
chr1	15933480	15933965	PotentialPeaks_H3K27Ac_peak_411	57	.	2.63614	7.67112	5.71846	256
chr1	16082931	16083718	PotentialPeaks_H3K27Ac_peak_412	456	.	6.62414	48.2093	45.6878	217
chr1	16093980	16095812	PotentialPeaks_H3K27Ac_peak_413	15198	.	15.1381	1524.58	1519.84	986
chr1	16095953	16096276	PotentialPeaks_H3K27Ac_peak_414	197	.	1.96538	22.0739	19.7773	102
chr1	16109866	16110061	PotentialPeaks_H3K27Ac_peak_415	80	.	2.9741	10.1113	8.06329	80
chr1	16112866	16113205	PotentialPeaks_H3K27Ac_peak_416	44	.	2.43336	6.33322	4.44884	26
chr1	16113582	16113770	PotentialPeaks_H3K27Ac_peak_417	39	.	2.34917	5.83852	3.99135	116
chr1	16118246	16118558	PotentialPeaks_H3K27Ac_peak_418	57	.	2.63614	7.67112	5.71846	226
chr1	16125333	16127084	PotentialPeaks_H3K27Ac_peak_419	185	.	4.00119	20.7989	18.5202	1276
chr1	16162709	16163235	PotentialPeaks_H3K27Ac_peak_420	95	.	3.17688	11.6917	9.59507	397
chr1	16163403	16163626	PotentialPeaks_H3K27Ac_peak_421	57	.	2.63614	7.67112	5.71846	108
chr1	16164037	16164376	PotentialPeaks_H3K27Ac_peak_422	57	.	2.63614	7.67112	5.71846	211
chr1	16191988	16192264	PotentialPeaks_H3K27Ac_peak_423	123	.	3.51485	14.503	12.3362	135
chr1	16192588	16193097	PotentialPeaks_H3K27Ac_peak_424	66	.	2.77132	8.61684	6.62356	134
chr1	16194317	16194511	PotentialPeaks_H3K27Ac_peak_425	44	.	2.43336	6.33322	4.44884	85
chr1	16195027	16195187	PotentialPeaks_H3K27Ac_peak_426	32	.	2.23058	5.09859	3.29362	54
chr1	16205764	16206287	PotentialPeaks_H3K27Ac_peak_427	96	.	2.68461	11.7212	9.62384	348
chr1	16206823	16207156	PotentialPeaks_H3K27Ac_peak_428	91	.	2.63186	11.2	9.11789	74
chr1	16217888	16218559	PotentialPeaks_H3K27Ac_peak_429	271	.	4.04412	29.5073	27.1255	131
chr1	16218696	16219044	PotentialPeaks_H3K27Ac_peak_430	58	.	2.30432	7.81307	5.85566	200
chr1	16219354	16219918	PotentialPeaks_H3K27Ac_peak_431	78	.	2.51841	9.84298	7.80587	94
chr1	16225433	16226041	PotentialPeaks_H3K27Ac_peak_432	70	.	2.83892	9.10511	7.09274	91
chr1	16239347	16239537	PotentialPeaks_H3K27Ac_peak_433	72	.	2.83455	9.25952	7.24271	125
chr1	16239923	16240278	PotentialPeaks_H3K27Ac_peak_434	73	.	2.82204	9.373	7.35297	87
chr1	16258660	16258824	PotentialPeaks_H3K27Ac_peak_435	36	.	2.29817	5.49817	3.66539	40
chr1	16262330	16262487	PotentialPeaks_H3K27Ac_peak_436	29	.	2.16298	4.71138	2.93583	13
chr1	16283410	16283594	PotentialPeaks_H3K27Ac_peak_437	40	.	2.36576	5.90982	4.05058	53
chr1	16508707	16509627	PotentialPeaks_H3K27Ac_peak_438	3022	.	11.2682	305.392	302.25	538
chr1	16509782	16510283	PotentialPeaks_H3K27Ac_peak_439	3878	.	13.2448	391.168	387.891	274
chr1	16608577	16609423	PotentialPeaks_H3K27Ac_peak_440	8884	.	18.2436	892.387	888.405	621
chr1	16609602	16609823	PotentialPeaks_H3K27Ac_peak_441	115	.	2.1414	13.6882	11.5413	60
chr1	16646356	16647786	PotentialPeaks_H3K27Ac_peak_442	4502	.	12.1991	453.645	450.275	547
chr1	16655040	16655895	PotentialPeaks_H3K27Ac_peak_443	8367	.	19.6755	840.631	836.717	418
chr1	16677863	16679154	PotentialPeaks_H3K27Ac_peak_444	997	.	9.66124	102.45	99.7117	793
chr1	16880179	16880510	PotentialPeaks_H3K27Ac_peak_445	95	.	3.17688	11.6917	9.59507	55
chr1	17086990	17088132	PotentialPeaks_H3K27Ac_peak_446	644	.	8.0436	67.0595	64.445	741
chr1	17135439	17135854	PotentialPeaks_H3K27Ac_peak_447	625	.	7.90841	65.1906	62.5841	177
chr1	17756747	17757193	PotentialPeaks_H3K27Ac_peak_448	40	.	2.36576	5.90982	4.05058	41
chr1	17827405	17827572	PotentialPeaks_H3K27Ac_peak_449	36	.	2.29817	5.49817	3.66539	124
chr1	17828748	17828921	PotentialPeaks_H3K27Ac_peak_450	75	.	2.90651	9.60334	7.57276	110
chr1	18048133	18048963	PotentialPeaks_H3K27Ac_peak_451	414	.	6.28617	43.993	41.4973	522
chr1	18096055	18096373	PotentialPeaks_H3K27Ac_peak_452	171	.	4.0556	19.4181	17.1604	156
chr1	18213425	18213780	PotentialPeaks_H3K27Ac_peak_453	57	.	2.63614	7.67112	5.71846	311
chr1	18213963	18214124	PotentialPeaks_H3K27Ac_peak_454	75	.	2.90651	9.60334	7.57276	57
chr1	18214447	18214640	PotentialPeaks_H3K27Ac_peak_455	40	.	2.36576	5.90982	4.05058	56
chr1	18259523	18259673	PotentialPeaks_H3K27Ac_peak_456	44	.	2.43336	6.33322	4.44884	45
chr1	18341068	18341332	PotentialPeaks_H3K27Ac_peak_457	146	.	3.78522	16.8998	14.6849	130
chr1	18351728	18351917	PotentialPeaks_H3K27Ac_peak_458	40	.	2.36576	5.90982	4.05058	113
chr1	18371970	18372190	PotentialPeaks_H3K27Ac_peak_459	106	.	3.31207	12.7905	10.6643	79
chr1	18372422	18372618	PotentialPeaks_H3K27Ac_peak_460	40	.	2.36576	5.90982	4.05058	124
chr1	18373422	18373624	PotentialPeaks_H3K27Ac_peak_461	32	.	2.23058	5.09859	3.29362	57
chr1	18379965	18380232	PotentialPeaks_H3K27Ac_peak_462	106	.	3.31207	12.7905	10.6643	136
chr1	18404905	18405349	PotentialPeaks_H3K27Ac_peak_463	129	.	2.53816	15.1488	12.9682	316
chr1	18405537	18406552	PotentialPeaks_H3K27Ac_peak_464	1247	.	7.09922	127.581	124.776	431
chr1	18406756	18407016	PotentialPeaks_H3K27Ac_peak_465	130	.	2.57525	15.2354	13.0533	120
chr1	18447488	18447641	PotentialPeaks_H3K27Ac_peak_466	44	.	2.43336	6.33322	4.44884	30
chr1	18452220	18452530	PotentialPeaks_H3K27Ac_peak_467	56	.	2.3213	7.55341	5.61074	93
chr1	18453392	18454121	PotentialPeaks_H3K27Ac_peak_468	212	.	3.81113	23.61	21.2934	551
chr1	18454208	18454417	PotentialPeaks_H3K27Ac_peak_469	50	.	2.26809	7.00554	5.08862	46
chr1	18454635	18454875	PotentialPeaks_H3K27Ac_peak_470	40	.	2.14628	5.88987	4.04047	123
chr1	18560177	18560347	PotentialPeaks_H3K27Ac_peak_471	40	.	2.36576	5.90982	4.05058	80
chr1	18573449	18573780	PotentialPeaks_H3K27Ac_peak_472	61	.	2.70373	8.13877	6.16537	140
chr1	18589075	18589704	PotentialPeaks_H3K27Ac_peak_473	498	.	6.31167	52.4232	49.8784	352
chr1	18589864	18590145	PotentialPeaks_H3K27Ac_peak_474	217	.	4.20667	24.0511	21.7295	125
chr1	18590651	18591036	PotentialPeaks_H3K27Ac_peak_475	60	.	2.5856	8.04063	6.07578	289
chr1	18628917	18630480	PotentialPeaks_H3K27Ac_peak_476	231	.	4.66394	25.4897	23.1502	911
chr1	18839062	18839243	PotentialPeaks_H3K27Ac_peak_477	57	.	2.63614	7.67112	5.71846	60
chr1	18945934	18946089	PotentialPeaks_H3K27Ac_peak_478	52	.	2.56854	7.21414	5.28312	16
chr1	18946702	18946880	PotentialPeaks_H3K27Ac_peak_479	25	.	2.09539	4.33687	2.59236	87
chr1	18946933	18947294	PotentialPeaks_H3K27Ac_peak_480	319	.	5.47505	34.3584	31.9328	147
chr1	19199304	19199672	PotentialPeaks_H3K27Ac_peak_481	98	.	2.12448	11.9699	9.86679	254
chr1	19199807	19200251	PotentialPeaks_H3K27Ac_peak_482	1739	.	7.07175	176.827	173.912	266
chr1	19200318	19200668	PotentialPeaks_H3K27Ac_peak_483	396	.	3.40614	42.1183	39.6352	96
chr1	19200742	19201049	PotentialPeaks_H3K27Ac_peak_484	431	.	3.52006	45.6201	43.1143	178
chr1	19201217	19201410	PotentialPeaks_H3K27Ac_peak_485	150	.	2.38035	17.3038	15.0824	48
chr1	19204166	19204468	PotentialPeaks_H3K27Ac_peak_486	193	.	2.65516	21.6175	19.3275	162
chr1	19231562	19231719	PotentialPeaks_H3K27Ac_peak_487	78	.	2.66987	9.88259	7.84441	52
chr1	19234474	19235052	PotentialPeaks_H3K27Ac_peak_488	129	.	3.16133	15.1141	12.9342	442
chr1	19235618	19236066	PotentialPeaks_H3K27Ac_peak_489	298	.	4.64246	32.2548	29.8472	310
chr1	19282313	19282463	PotentialPeaks_H3K27Ac_peak_490	57	.	2.63614	7.67112	5.71846	84
chr1	19402212	19402463	PotentialPeaks_H3K27Ac_peak_491	52	.	2.56854	7.21414	5.28312	138
chr1	19662603	19662872	PotentialPeaks_H3K27Ac_peak_492	29	.	2.16298	4.71138	2.93583	221
chr1	19663011	19663161	PotentialPeaks_H3K27Ac_peak_493	52	.	2.56854	7.21414	5.28312	87
chr1	19663878	19664285	PotentialPeaks_H3K27Ac_peak_494	85	.	3.0417	10.6288	8.56398	331
chr1	19664634	19665022	PotentialPeaks_H3K27Ac_peak_495	217	.	4.52875	24.0947	21.7718	141
chr1	19670521	19671185	PotentialPeaks_H3K27Ac_peak_496	162	.	3.8346	18.4829	16.2409	462
chr1	19671435	19671604	PotentialPeaks_H3K27Ac_peak_497	40	.	2.34059	5.92641	4.06652	45
chr1	19672436	19672652	PotentialPeaks_H3K27Ac_peak_498	79	.	2.95922	10.0398	7.99737	106
chr1	19688455	19688656	PotentialPeaks_H3K27Ac_peak_499	75	.	2.90651	9.60334	7.57276	100
chr1	19764853	19765003	PotentialPeaks_H3K27Ac_peak_500	66	.	2.77132	8.61684	6.62356	37
chr1	19858028	19858459	PotentialPeaks_H3K27Ac_peak_501	61	.	2.70373	8.13877	6.16537	315
chr1	19889733	19889967	PotentialPeaks_H3K27Ac_peak_502	52	.	2.56854	7.21414	5.28312	124
chr1	19890771	19890927	PotentialPeaks_H3K27Ac_peak_503	32	.	2.23058	5.09859	3.29362	112
chr1	19891362	19891661	PotentialPeaks_H3K27Ac_peak_504	40	.	2.36576	5.90982	4.05058	51
chr1	19917155	19917869	PotentialPeaks_H3K27Ac_peak_505	203	.	3.43343	22.6056	20.3025	426
chr1	19918295	19919298	PotentialPeaks_H3K27Ac_peak_506	284	.	3.97352	30.8531	28.4584	265
chr1	19940539	19941273	PotentialPeaks_H3K27Ac_peak_507	139	.	2.84002	16.1006	13.9018	187
chr1	19941558	19942490	PotentialPeaks_H3K27Ac_peak_508	779	.	6.10601	80.6292	77.9613	296
chr1	19958801	19958965	PotentialPeaks_H3K27Ac_peak_509	83	.	2.62609	10.3937	8.33827	53
chr1	19963087	19963521	PotentialPeaks_H3K27Ac_peak_510	184	.	3.08285	20.7301	18.4524	157
chr1	19963682	19964236	PotentialPeaks_H3K27Ac_peak_511	691	.	5.6872	71.7925	69.1585	348
chr1	19964371	19964597	PotentialPeaks_H3K27Ac_peak_512	85	.	2.37841	10.5677	8.50779	112
chr1	19964684	19965219	PotentialPeaks_H3K27Ac_peak_513	387	.	4.30303	41.2626	38.7852	144
chr1	19970318	19970468	PotentialPeaks_H3K27Ac_peak_514	54	.	2.25346	7.38037	5.44366	19
chr1	19971722	19971872	PotentialPeaks_H3K27Ac_peak_515	43	.	2.12874	6.20156	4.33062	29
chr1	19973133	19973283	PotentialPeaks_H3K27Ac_peak_516	36	.	2.05894	5.5136	3.68018	97
chr1	19973569	19974123	PotentialPeaks_H3K27Ac_peak_517	144	.	3.21165	16.7023	14.492	263
chr1	20008118	20009140	PotentialPeaks_H3K27Ac_peak_518	129	.	3.58244	15.0903	12.9108	719
chr1	20009512	20009671	PotentialPeaks_H3K27Ac_peak_519	66	.	2.77132	8.61684	6.62356	109
chr1	20048080	20048528	PotentialPeaks_H3K27Ac_peak_520	36	.	2.29817	5.49817	3.66539	330
chr1	20096290	20096715	PotentialPeaks_H3K27Ac_peak_521	129	.	3.58244	15.0903	12.9108	153
chr1	20096951	20097488	PotentialPeaks_H3K27Ac_peak_522	60	.	2.6659	7.96432	6.00197	123
chr1	20099730	20099924	PotentialPeaks_H3K27Ac_peak_523	60	.	2.59029	8.06402	6.09841	103
chr1	20107780	20108026	PotentialPeaks_H3K27Ac_peak_524	48	.	2.50095	6.76809	4.85978	126
chr1	20121890	20122190	PotentialPeaks_H3K27Ac_peak_525	45	.	2.26378	6.40077	4.51381	244
chr1	20124606	20125227	PotentialPeaks_H3K27Ac_peak_526	124	.	2.99537	14.5854	12.417	114
chr1	20125683	20125947	PotentialPeaks_H3K27Ac_peak_527	196	.	3.58985	21.9649	19.6705	146
chr1	20126189	20126355	PotentialPeaks_H3K27Ac_peak_528	53	.	2.2633	7.32533	5.39053	50
chr1	20165975	20166452	PotentialPeaks_H3K27Ac_peak_529	110	.	2.74808	13.152	11.0182	287
chr1	20169610	20170264	PotentialPeaks_H3K27Ac_peak_530	553	.	5.18704	57.9098	55.337	467
chr1	20170596	20170942	PotentialPeaks_H3K27Ac_peak_531	117	.	2.67942	13.9027	11.7514	209
chr1	20171021	20171359	PotentialPeaks_H3K27Ac_peak_532	183	.	3.22262	20.5757	18.3009	223
chr1	20171581	20171736	PotentialPeaks_H3K27Ac_peak_533	60	.	2.2244	7.98003	6.0172	55
chr1	20171791	20171983	PotentialPeaks_H3K27Ac_peak_534	72	.	2.35894	9.28286	7.26539	107
chr1	20177970	20178298	PotentialPeaks_H3K27Ac_peak_535	57	.	2.63614	7.67112	5.71846	250
chr1	20180189	20180591	PotentialPeaks_H3K27Ac_peak_536	66	.	2.77132	8.61684	6.62356	45
chr1	20180652	20180831	PotentialPeaks_H3K27Ac_peak_537	66	.	2.77132	8.61684	6.62356	102
chr1	20291480	20293152	PotentialPeaks_H3K27Ac_peak_538	845	.	6.23458	87.2415	84.5508	504
chr1	20293400	20293909	PotentialPeaks_H3K27Ac_peak_539	333	.	3.91872	35.7879	33.3511	174
chr1	20334568	20334760	PotentialPeaks_H3K27Ac_peak_540	57	.	2.63614	7.67112	5.71846	103
chr1	20418400	20419148	PotentialPeaks_H3K27Ac_peak_541	123	.	3.51485	14.503	12.3362	577
chr1	20460931	20461222	PotentialPeaks_H3K27Ac_peak_542	36	.	2.29817	5.49817	3.66539	231
chr1	20467393	20468363	PotentialPeaks_H3K27Ac_peak_543	846	.	8.29155	87.3628	84.6717	693
chr1	20492348	20492563	PotentialPeaks_H3K27Ac_peak_544	31	.	2.1681	4.94534	3.15875	65
chr1	20493394	20493753	PotentialPeaks_H3K27Ac_peak_545	82	.	2.89694	10.2816	8.22914	79
chr1	20493865	20494025	PotentialPeaks_H3K27Ac_peak_546	47	.	2.41505	6.65087	4.75431	95
chr1	20494592	20494745	PotentialPeaks_H3K27Ac_peak_547	53	.	2.55313	7.29175	5.35804	98
chr1	20667401	20667714	PotentialPeaks_H3K27Ac_peak_548	67	.	2.76315	8.7467	6.7495	171
chr1	20668777	20669533	PotentialPeaks_H3K27Ac_peak_549	149	.	3.77994	17.1328	14.9141	104
chr1	20669661	20669847	PotentialPeaks_H3K27Ac_peak_550	57	.	2.63614	7.67112	5.71846	127
chr1	20751167	20751413	PotentialPeaks_H3K27Ac_peak_551	66	.	2.77132	8.61684	6.62356	119
chr1	20751717	20752154	PotentialPeaks_H3K27Ac_peak_552	95	.	3.17688	11.6917	9.59507	296
chr1	20770509	20770719	PotentialPeaks_H3K27Ac_peak_553	52	.	2.56854	7.21414	5.28312	120
chr1	20791155	20791970	PotentialPeaks_H3K27Ac_peak_554	80	.	2.9741	10.1113	8.06329	486
chr1	20809892	20810360	PotentialPeaks_H3K27Ac_peak_555	2591	.	14.8427	262.262	259.191	284
chr1	20810672	20810875	PotentialPeaks_H3K27Ac_peak_556	151	.	3.24733	17.3791	15.1566	82
chr1	20835030	20835559	PotentialPeaks_H3K27Ac_peak_557	125	.	3.47347	14.7595	12.5879	99
chr1	20835638	20836527	PotentialPeaks_H3K27Ac_peak_558	179	.	4.04846	20.2278	17.9578	331
chr1	20836651	20836922	PotentialPeaks_H3K27Ac_peak_559	34	.	2.21908	5.27487	3.46213	140
chr1	20852929	20853123	PotentialPeaks_H3K27Ac_peak_560	88	.	2.71072	10.9307	8.85831	94
chr1	20856930	20857369	PotentialPeaks_H3K27Ac_peak_561	157	.	2.977	18.0231	15.7892	364
chr1	20857734	20858610	PotentialPeaks_H3K27Ac_peak_562	547	.	5.2046	57.3625	54.7924	213
chr1	20880303	20881840	PotentialPeaks_H3K27Ac_peak_563	2559	.	11.0566	259.049	255.983	515
chr1	20888709	20889131	PotentialPeaks_H3K27Ac_peak_564	33	.	2.11007	5.1967	3.38742	35
chr1	20895192	20895590	PotentialPeaks_H3K27Ac_peak_565	291	.	3.36062	31.5758	29.1744	148
chr1	20896010	20896985	PotentialPeaks_H3K27Ac_peak_566	201	.	2.89453	22.4852	20.1836	806
chr1	20897058	20897399	PotentialPeaks_H3K27Ac_peak_567	120	.	2.42181	14.2033	12.0442	103
chr1	20898214	20898364	PotentialPeaks_H3K27Ac_peak_568	42	.	1.79839	6.08765	4.22128	133
chr1	20898932	20899204	PotentialPeaks_H3K27Ac_peak_569	71	.	2.04157	9.15762	7.14376	100
chr1	20902722	20903015	PotentialPeaks_H3K27Ac_peak_570	238	.	3.60074	26.2065	23.8589	149
chr1	20912933	20913314	PotentialPeaks_H3K27Ac_peak_571	112	.	3.33542	13.3512	11.2127	200
chr1	20913727	20914021	PotentialPeaks_H3K27Ac_peak_572	75	.	2.85513	9.53514	7.51051	249
chr1	20941014	20941551	PotentialPeaks_H3K27Ac_peak_573	437	.	3.81839	46.2678	43.758	396
chr1	20941712	20942528	PotentialPeaks_H3K27Ac_peak_574	4450	.	13.733	448.412	445.049	193
chr1	20986697	20986933	PotentialPeaks_H3K27Ac_peak_575	65	.	2.7121	8.50289	6.51799	112
chr1	20987096	20987403	PotentialPeaks_H3K27Ac_peak_576	72	.	2.80848	9.3063	7.28815	175
chr1	21042033	21043463	PotentialPeaks_H3K27Ac_peak_577	107	.	3.24592	12.8855	10.7572	1315
chr1	21064051	21064410	PotentialPeaks_H3K27Ac_peak_578	77	.	2.28505	9.80857	7.77242	82
chr1	21066277	21066570	PotentialPeaks_H3K27Ac_peak_579	68	.	1.98506	8.84707	6.84688	124
chr1	21068875	21069309	PotentialPeaks_H3K27Ac_peak_580	552	.	4.32517	57.8717	55.2991	309
chr1	21069458	21069995	PotentialPeaks_H3K27Ac_peak_581	2550	.	10.2421	258.079	255.014	247
chr1	21149817	21150202	PotentialPeaks_H3K27Ac_peak_582	85	.	3.0417	10.6288	8.56398	285
chr1	21150841	21151309	PotentialPeaks_H3K27Ac_peak_583	75	.	2.90651	9.60334	7.57276	219
chr1	21156489	21156998	PotentialPeaks_H3K27Ac_peak_584	358	.	5.81302	38.2859	35.8296	243
chr1	21208528	21209440	PotentialPeaks_H3K27Ac_peak_585	1798	.	14.4337	182.791	179.864	252
chr1	21242772	21243064	PotentialPeaks_H3K27Ac_peak_586	29	.	2.16298	4.71138	2.93583	231
chr1	21335321	21335528	PotentialPeaks_H3K27Ac_peak_587	70	.	2.83892	9.10511	7.09274	94
chr1	21401529	21402578	PotentialPeaks_H3K27Ac_peak_588	165	.	3.988	18.7776	16.5301	104
chr1	21405283	21405433	PotentialPeaks_H3K27Ac_peak_589	44	.	2.43336	6.33322	4.44884	41
chr1	21449069	21449291	PotentialPeaks_H3K27Ac_peak_590	61	.	2.70373	8.13877	6.16537	73
chr1	21476272	21476422	PotentialPeaks_H3K27Ac_peak_591	22	.	2.0278	3.97542	2.26388	34
chr1	21477444	21477594	PotentialPeaks_H3K27Ac_peak_592	36	.	2.29817	5.49817	3.66539	37
chr1	21489908	21490093	PotentialPeaks_H3K27Ac_peak_593	44	.	2.43336	6.33322	4.44884	125
chr1	21528045	21528236	PotentialPeaks_H3K27Ac_peak_594	85	.	3.0417	10.6288	8.56398	121
chr1	21534345	21534497	PotentialPeaks_H3K27Ac_peak_595	44	.	2.43336	6.33322	4.44884	13
chr1	21583710	21583891	PotentialPeaks_H3K27Ac_peak_596	101	.	3.24448	12.2367	10.125	73
chr1	21584315	21584695	PotentialPeaks_H3K27Ac_peak_597	80	.	2.9741	10.1113	8.06329	251
chr1	21750476	21751212	PotentialPeaks_H3K27Ac_peak_598	231	.	4.66394	25.4897	23.1502	543
chr1	21795432	21795775	PotentialPeaks_H3K27Ac_peak_599	57	.	2.63614	7.67112	5.71846	207
chr1	21809604	21810286	PotentialPeaks_H3K27Ac_peak_600	582	.	6.22252	60.8421	58.2554	434
chr1	21810645	21810965	PotentialPeaks_H3K27Ac_peak_601	176	.	3.51389	19.9628	17.6973	100
chr1	21811919	21812138	PotentialPeaks_H3K27Ac_peak_602	99	.	2.78717	12.0883	9.9826	107
chr1	21816166	21816324	PotentialPeaks_H3K27Ac_peak_603	29	.	2.10347	4.66797	2.90692	23
chr1	21820364	21820613	PotentialPeaks_H3K27Ac_peak_604	90	.	3.10929	11.1557	9.07465	129
chr1	21865710	21865938	PotentialPeaks_H3K27Ac_peak_605	36	.	2.29817	5.49817	3.66539	148
chr1	21908626	21909128	PotentialPeaks_H3K27Ac_peak_606	70	.	2.83892	9.10511	7.09274	385
chr1	21909200	21909425	PotentialPeaks_H3K27Ac_peak_607	66	.	2.77132	8.61684	6.62356	115
chr1	21909617	21910166	PotentialPeaks_H3K27Ac_peak_608	146	.	3.78522	16.8998	14.6849	327
chr1	21950961	21952418	PotentialPeaks_H3K27Ac_peak_609	899	.	6.83621	92.6967	89.9881	281
chr1	22060125	22060348	PotentialPeaks_H3K27Ac_peak_610	25	.	2.09539	4.33687	2.59236	96
chr1	22256330	22256572	PotentialPeaks_H3K27Ac_peak_611	36	.	2.29817	5.49817	3.66539	119
chr1	22257464	22257623	PotentialPeaks_H3K27Ac_peak_612	52	.	2.56854	7.21414	5.28312	78
chr1	22473952	22474233	PotentialPeaks_H3K27Ac_peak_613	342	.	5.67783	36.6995	34.2553	125
chr1	22480420	22480669	PotentialPeaks_H3K27Ac_peak_614	29	.	2.16298	4.71138	2.93583	132
chr1	22515718	22516681	PotentialPeaks_H3K27Ac_peak_615	75	.	2.90651	9.60334	7.57276	460
chr1	22540041	22540994	PotentialPeaks_H3K27Ac_peak_616	653	.	8.11119	67.9995	65.3809	403
chr1	22622493	22623163	PotentialPeaks_H3K27Ac_peak_617	127	.	3.41993	14.9324	12.7575	425
chr1	22646851	22647007	PotentialPeaks_H3K27Ac_peak_618	40	.	2.36576	5.90982	4.05058	98
chr1	22657625	22657810	PotentialPeaks_H3K27Ac_peak_619	32	.	2.23058	5.09859	3.29362	145
chr1	22812206	22813492	PotentialPeaks_H3K27Ac_peak_620	2167	.	11.5264	219.768	216.771	524
chr1	22941954	22942190	PotentialPeaks_H3K27Ac_peak_621	36	.	2.29817	5.49817	3.66539	115
chr1	23094149	23094320	PotentialPeaks_H3K27Ac_peak_622	57	.	2.63614	7.67112	5.71846	56
chr1	23209224	23209680	PotentialPeaks_H3K27Ac_peak_623	177	.	4.12319	20.0658	17.798	322
chr1	23209938	23210385	PotentialPeaks_H3K27Ac_peak_624	112	.	3.37966	13.3529	11.2127	70
chr1	23263109	23263898	PotentialPeaks_H3K27Ac_peak_625	6785	.	15.9459	682.258	678.561	411
chr1	23264106	23264256	PotentialPeaks_H3K27Ac_peak_626	33	.	1.63557	5.17767	3.36924	99
chr1	23271254	23271436	PotentialPeaks_H3K27Ac_peak_627	36	.	2.29817	5.49817	3.66539	36
chr1	23277296	23277492	PotentialPeaks_H3K27Ac_peak_628	87	.	2.96132	10.7986	8.7295	138
chr1	23277840	23278853	PotentialPeaks_H3K27Ac_peak_629	282	.	4.91272	30.6625	28.2694	623
chr1	23327634	23327796	PotentialPeaks_H3K27Ac_peak_630	36	.	2.29817	5.49817	3.66539	27
chr1	23327856	23328459	PotentialPeaks_H3K27Ac_peak_631	165	.	3.988	18.7776	16.5301	212
chr1	23350260	23350410	PotentialPeaks_H3K27Ac_peak_632	29	.	2.16298	4.71138	2.93583	54
chr1	23384134	23384561	PotentialPeaks_H3K27Ac_peak_633	48	.	2.50095	6.76809	4.85978	92
chr1	23389384	23390230	PotentialPeaks_H3K27Ac_peak_634	3370	.	13.1602	340.2	337.003	339
chr1	23390352	23390855	PotentialPeaks_H3K27Ac_peak_635	437	.	4.23807	46.2206	43.7111	223
chr1	23496761	23497453	PotentialPeaks_H3K27Ac_peak_636	105	.	3.28552	12.6574	10.5364	575
chr1	23497522	23497908	PotentialPeaks_H3K27Ac_peak_637	106	.	3.3089	12.7747	10.6511	94
chr1	23497985	23498300	PotentialPeaks_H3K27Ac_peak_638	57	.	2.63614	7.67112	5.71846	208
chr1	23549197	23549351	PotentialPeaks_H3K27Ac_peak_639	48	.	2.50095	6.76809	4.85978	42
chr1	23656662	23657096	PotentialPeaks_H3K27Ac_peak_640	80	.	2.9741	10.1113	8.06329	134
chr1	23663888	23664038	PotentialPeaks_H3K27Ac_peak_641	48	.	2.50095	6.76809	4.85978	76
chr1	23712729	23713007	PotentialPeaks_H3K27Ac_peak_642	52	.	2.56854	7.21414	5.28312	31
chr1	23713079	23713554	PotentialPeaks_H3K27Ac_peak_643	152	.	3.85282	17.5183	15.2922	188
chr1	23726157	23726335	PotentialPeaks_H3K27Ac_peak_644	70	.	2.83892	9.10511	7.09274	104
chr1	23729283	23729480	PotentialPeaks_H3K27Ac_peak_645	48	.	2.50095	6.76809	4.85978	93
chr1	23738815	23739491	PotentialPeaks_H3K27Ac_peak_646	204	.	4.39356	22.7251	20.4198	450
chr1	23739714	23739944	PotentialPeaks_H3K27Ac_peak_647	197	.	4.32597	22.0502	19.7539	129
chr1	23740555	23740714	PotentialPeaks_H3K27Ac_peak_648	101	.	3.24448	12.2367	10.125	17
chr1	23756793	23757119	PotentialPeaks_H3K27Ac_peak_649	90	.	3.10929	11.1557	9.07465	113
chr1	23757429	23757977	PotentialPeaks_H3K27Ac_peak_650	165	.	3.988	18.7776	16.5301	142
chr1	23768496	23769730	PotentialPeaks_H3K27Ac_peak_651	663	.	6.16754	68.9323	66.31	476
chr1	23769904	23770287	PotentialPeaks_H3K27Ac_peak_652	78	.	2.43713	9.83933	7.80232	67
chr1	23841315	23841627	PotentialPeaks_H3K27Ac_peak_653	66	.	2.77132	8.61684	6.62356	113
chr1	23842001	23842171	PotentialPeaks_H3K27Ac_peak_654	90	.	3.10929	11.1557	9.07465	68
chr1	23850187	23850478	PotentialPeaks_H3K27Ac_peak_655	48	.	2.50095	6.76809	4.85978	80
chr1	23928468	23929202	PotentialPeaks_H3K27Ac_peak_656	5472	.	17.2307	550.756	547.245	384
chr1	24011876	24012783	PotentialPeaks_H3K27Ac_peak_657	5071	.	21.8607	510.63	507.177	462
chr1	24106408	24107163	PotentialPeaks_H3K27Ac_peak_658	6526	.	14.585	656.308	652.647	509
chr1	24107378	24107716	PotentialPeaks_H3K27Ac_peak_659	2376	.	7.83808	240.689	237.655	174
chr1	24114284	24114961	PotentialPeaks_H3K27Ac_peak_660	159	.	3.92041	18.1443	15.9073	407
chr1	24115037	24115420	PotentialPeaks_H3K27Ac_peak_661	101	.	3.24448	12.2367	10.125	194
chr1	24232846	24233001	PotentialPeaks_H3K27Ac_peak_662	40	.	2.36576	5.90982	4.05058	48
chr1	24233100	24233335	PotentialPeaks_H3K27Ac_peak_663	75	.	2.90651	9.60334	7.57276	122
chr1	24239313	24239489	PotentialPeaks_H3K27Ac_peak_664	16	.	1.89261	3.29314	1.65376	164
chr1	24255153	24256058	PotentialPeaks_H3K27Ac_peak_665	184	.	4.19078	20.7204	18.4428	625
chr1	24293803	24294010	PotentialPeaks_H3K27Ac_peak_666	40	.	2.36576	5.90982	4.05058	78
chr1	24299786	24300006	PotentialPeaks_H3K27Ac_peak_667	48	.	2.50095	6.76809	4.85978	117
chr1	24309972	24310122	PotentialPeaks_H3K27Ac_peak_668	52	.	2.56854	7.21414	5.28312	79
chr1	24317895	24318081	PotentialPeaks_H3K27Ac_peak_669	70	.	2.83892	9.10511	7.09274	77
chr1	24323375	24323804	PotentialPeaks_H3K27Ac_peak_670	106	.	3.31207	12.7905	10.6643	117
chr1	24385102	24385266	PotentialPeaks_H3K27Ac_peak_671	36	.	2.29817	5.49817	3.66539	71
chr1	24412022	24412184	PotentialPeaks_H3K27Ac_peak_672	48	.	2.50095	6.76809	4.85978	67
chr1	24464212	24464396	PotentialPeaks_H3K27Ac_peak_673	44	.	2.43336	6.33322	4.44884	88
chr1	24467906	24468056	PotentialPeaks_H3K27Ac_peak_674	40	.	2.36576	5.90982	4.05058	122
chr1	24477401	24477642	PotentialPeaks_H3K27Ac_peak_675	75	.	2.90651	9.60334	7.57276	112
chr1	24477875	24478246	PotentialPeaks_H3K27Ac_peak_676	95	.	3.17688	11.6917	9.59507	238
chr1	24558743	24558997	PotentialPeaks_H3K27Ac_peak_677	75	.	2.90651	9.60334	7.57276	190
chr1	24560652	24560834	PotentialPeaks_H3K27Ac_peak_678	40	.	2.36576	5.90982	4.05058	94
chr1	24593326	24593825	PotentialPeaks_H3K27Ac_peak_679	231	.	4.66394	25.4897	23.1502	272
chr1	24593971	24594306	PotentialPeaks_H3K27Ac_peak_680	61	.	2.70373	8.13877	6.16537	247
chr1	24684946	24686229	PotentialPeaks_H3K27Ac_peak_681	8601	.	21.1116	864.121	860.177	727
chr1	24777120	24777278	PotentialPeaks_H3K27Ac_peak_682	48	.	2.50095	6.76809	4.85978	21
chr1	24797886	24798037	PotentialPeaks_H3K27Ac_peak_683	40	.	2.36576	5.90982	4.05058	69
chr1	24798415	24798646	PotentialPeaks_H3K27Ac_peak_684	44	.	2.43336	6.33322	4.44884	90
chr1	24798851	24799160	PotentialPeaks_H3K27Ac_peak_685	61	.	2.70373	8.13877	6.16537	86
chr1	24815398	24815694	PotentialPeaks_H3K27Ac_peak_686	66	.	2.77132	8.61684	6.62356	118
chr1	24994502	24994797	PotentialPeaks_H3K27Ac_peak_687	29	.	2.16298	4.71138	2.93583	149
chr1	24994918	24995159	PotentialPeaks_H3K27Ac_peak_688	44	.	2.43336	6.33322	4.44884	138
chr1	24999507	24999721	PotentialPeaks_H3K27Ac_peak_689	182	.	3.34986	20.5573	18.2829	122
chr1	24999832	24999982	PotentialPeaks_H3K27Ac_peak_690	35	.	1.9843	5.35876	3.54223	93
chr1	25000113	25000543	PotentialPeaks_H3K27Ac_peak_691	463	.	5.23695	48.8452	46.3202	281
chr1	25000622	25000870	PotentialPeaks_H3K27Ac_peak_692	254	.	3.94527	27.8646	25.4992	134
chr1	25001221	25001408	PotentialPeaks_H3K27Ac_peak_693	70	.	2.41345	9.01514	7.00997	53
chr1	25028734	25029051	PotentialPeaks_H3K27Ac_peak_694	106	.	3.31207	12.7905	10.6643	177
chr1	25065418	25065879	PotentialPeaks_H3K27Ac_peak_695	85	.	3.0417	10.6288	8.56398	260
chr1	25089863	25090254	PotentialPeaks_H3K27Ac_peak_696	174	.	3.91569	19.7502	17.4877	196
chr1	25090393	25090667	PotentialPeaks_H3K27Ac_peak_697	225	.	4.45058	24.9173	22.5846	94
chr1	25090839	25091459	PotentialPeaks_H3K27Ac_peak_698	232	.	4.61439	25.5403	23.2002	319
chr1	25142464	25142722	PotentialPeaks_H3K27Ac_peak_699	59	.	2.46071	7.95986	5.99764	173
chr1	25145087	25145717	PotentialPeaks_H3K27Ac_peak_700	180	.	3.79504	20.3541	18.0823	216
chr1	25154213	25154363	PotentialPeaks_H3K27Ac_peak_701	40	.	2.36576	5.90982	4.05058	35
chr1	25163885	25164700	PotentialPeaks_H3K27Ac_peak_702	283	.	4.76226	30.7417	28.3479	674
chr1	25165326	25165559	PotentialPeaks_H3K27Ac_peak_703	111	.	3.20638	13.308	11.1709	112
chr1	25222368	25222579	PotentialPeaks_H3K27Ac_peak_704	52	.	2.56854	7.21414	5.28312	149
chr1	25222898	25223080	PotentialPeaks_H3K27Ac_peak_705	36	.	2.29817	5.49817	3.66539	109
chr1	25223160	25223624	PotentialPeaks_H3K27Ac_peak_706	95	.	3.17688	11.6917	9.59507	380
chr1	25234334	25234981	PotentialPeaks_H3K27Ac_peak_707	81	.	2.82365	10.2494	8.19771	428
chr1	25235580	25235837	PotentialPeaks_H3K27Ac_peak_708	86	.	2.9121	10.7242	8.65698	205
chr1	25237238	25237495	PotentialPeaks_H3K27Ac_peak_709	52	.	2.43294	7.1372	5.21556	140
chr1	25237556	25237761	PotentialPeaks_H3K27Ac_peak_710	23	.	1.97297	4.10384	2.38554	62
chr1	25245946	25246372	PotentialPeaks_H3K27Ac_peak_711	36	.	2.29817	5.49817	3.66539	309
chr1	25246438	25246598	PotentialPeaks_H3K27Ac_peak_712	48	.	2.50095	6.76809	4.85978	45
chr1	25250623	25250781	PotentialPeaks_H3K27Ac_peak_713	29	.	2.16298	4.71138	2.93583	86
chr1	25284809	25286257	PotentialPeaks_H3K27Ac_peak_714	1380	.	8.22679	140.846	138.009	968
chr1	25400568	25400718	PotentialPeaks_H3K27Ac_peak_715	48	.	2.50095	6.76809	4.85978	88
chr1	25487249	25487447	PotentialPeaks_H3K27Ac_peak_716	75	.	2.90651	9.60334	7.57276	70
chr1	25532726	25532993	PotentialPeaks_H3K27Ac_peak_717	32	.	2.23058	5.09859	3.29362	71
chr1	25560523	25560924	PotentialPeaks_H3K27Ac_peak_718	70	.	2.83892	9.10511	7.09274	289
chr1	25560987	25561162	PotentialPeaks_H3K27Ac_peak_719	75	.	2.90651	9.60334	7.57276	67
chr1	25561511	25561851	PotentialPeaks_H3K27Ac_peak_720	117	.	3.44726	13.9238	11.7701	186
chr1	25567697	25567847	PotentialPeaks_H3K27Ac_peak_721	95	.	3.17688	11.6917	9.59507	90
chr1	25575973	25576236	PotentialPeaks_H3K27Ac_peak_722	52	.	2.56854	7.21414	5.28312	162
chr1	25678546	25678812	PotentialPeaks_H3K27Ac_peak_723	95	.	3.17688	11.6917	9.59507	149
chr1	25695169	25695350	PotentialPeaks_H3K27Ac_peak_724	52	.	2.56854	7.21414	5.28312	73
chr1	25768488	25768638	PotentialPeaks_H3K27Ac_peak_725	44	.	2.43336	6.33322	4.44884	131
chr1	25801573	25801815	PotentialPeaks_H3K27Ac_peak_726	61	.	2.70373	8.13877	6.16537	131
chr1	25835661	25835915	PotentialPeaks_H3K27Ac_peak_727	61	.	2.70373	8.13877	6.16537	95
chr1	25851070	25851233	PotentialPeaks_H3K27Ac_peak_728	40	.	2.36576	5.90982	4.05058	52
chr1	25868490	25868775	PotentialPeaks_H3K27Ac_peak_729	57	.	2.63614	7.67112	5.71846	114
chr1	25869240	25869403	PotentialPeaks_H3K27Ac_peak_730	32	.	2.23058	5.09859	3.29362	109
chr1	25886569	25887878	PotentialPeaks_H3K27Ac_peak_731	2764	.	8.99369	279.511	276.41	254
chr1	25887975	25888334	PotentialPeaks_H3K27Ac_peak_732	101	.	2.12809	12.3122	10.1988	137
chr1	25948303	25948454	PotentialPeaks_H3K27Ac_peak_733	73	.	2.65544	9.32835	7.30962	113
chr1	25948732	25949314	PotentialPeaks_H3K27Ac_peak_734	207	.	4.00373	23.0443	20.7351	333
chr1	25949395	25949632	PotentialPeaks_H3K27Ac_peak_735	133	.	3.30069	15.5766	13.3884	122
chr1	25949691	25950093	PotentialPeaks_H3K27Ac_peak_736	291	.	4.6766	31.5056	29.1048	141
chr1	26053311	26053557	PotentialPeaks_H3K27Ac_peak_737	44	.	2.43336	6.33322	4.44884	132
chr1	26053821	26054258	PotentialPeaks_H3K27Ac_peak_738	75	.	2.90651	9.60334	7.57276	275
chr1	26286125	26286572	PotentialPeaks_H3K27Ac_peak_739	140	.	3.71763	16.2889	14.0854	232
chr1	26339719	26339877	PotentialPeaks_H3K27Ac_peak_740	70	.	2.83892	9.10511	7.09274	128
chr1	26340247	26340465	PotentialPeaks_H3K27Ac_peak_741	85	.	3.0417	10.6288	8.56398	118
chr1	26412446	26412665	PotentialPeaks_H3K27Ac_peak_742	70	.	2.83892	9.10511	7.09274	102
chr1	26565300	26565450	PotentialPeaks_H3K27Ac_peak_743	29	.	2.16298	4.71138	2.93583	134
chr1	26655510	26655727	PotentialPeaks_H3K27Ac_peak_744	36	.	2.29817	5.49817	3.66539	103
chr1	26743221	26743518	PotentialPeaks_H3K27Ac_peak_745	73	.	2.75104	9.3554	7.33587	81
chr1	26743747	26744626	PotentialPeaks_H3K27Ac_peak_746	226	.	4.46322	24.9913	22.6578	644
chr1	26744836	26745183	PotentialPeaks_H3K27Ac_peak_747	314	.	5.38225	33.823	31.4019	153
chr1	26935157	26935352	PotentialPeaks_H3K27Ac_peak_748	36	.	2.29817	5.49817	3.66539	116
chr1	26938184	26938336	PotentialPeaks_H3K27Ac_peak_749	61	.	2.70373	8.13877	6.16537	54
chr1	26938763	26939092	PotentialPeaks_H3K27Ac_peak_750	95	.	3.17688	11.6917	9.59507	88
chr1	26940271	26940428	PotentialPeaks_H3K27Ac_peak_751	36	.	2.29817	5.49817	3.66539	32
chr1	28058736	28059066	PotentialPeaks_H3K27Ac_peak_752	44	.	2.43336	6.33322	4.44884	226
chr1	28059963	28060212	PotentialPeaks_H3K27Ac_peak_753	66	.	2.77132	8.61684	6.62356	93
chr1	28141059	28141294	PotentialPeaks_H3K27Ac_peak_754	66	.	2.77132	8.61684	6.62356	133
chr1	28271072	28271392	PotentialPeaks_H3K27Ac_peak_755	57	.	2.63614	7.67112	5.71846	69
chr1	28436216	28436445	PotentialPeaks_H3K27Ac_peak_756	66	.	2.77132	8.61684	6.62356	135
chr1	28533563	28534067	PotentialPeaks_H3K27Ac_peak_757	159	.	3.92041	18.1443	15.9073	128
chr1	28535115	28535265	PotentialPeaks_H3K27Ac_peak_758	44	.	2.43336	6.33322	4.44884	65
chr1	28605395	28605589	PotentialPeaks_H3K27Ac_peak_759	112	.	3.37966	13.3529	11.2127	118
chr1	28621479	28621638	PotentialPeaks_H3K27Ac_peak_760	89	.	2.81168	11.0461	8.97077	36
chr1	28621851	28622769	PotentialPeaks_H3K27Ac_peak_761	535	.	6.33763	56.1019	53.538	488
chr1	28640350	28640770	PotentialPeaks_H3K27Ac_peak_762	129	.	3.58244	15.0903	12.9108	361
chr1	28641086	28641359	PotentialPeaks_H3K27Ac_peak_763	32	.	2.23058	5.09859	3.29362	87
chr1	28659035	28659292	PotentialPeaks_H3K27Ac_peak_764	101	.	3.24448	12.2367	10.125	77
chr1	28732608	28732812	PotentialPeaks_H3K27Ac_peak_765	57	.	2.63614	7.67112	5.71846	90
chr1	28733020	28733172	PotentialPeaks_H3K27Ac_peak_766	48	.	2.50095	6.76809	4.85978	70
chr1	29273660	29274304	PotentialPeaks_H3K27Ac_peak_767	197	.	4.32597	22.0502	19.7539	507
chr1	29396689	29396882	PotentialPeaks_H3K27Ac_peak_768	52	.	2.56854	7.21414	5.28312	55
chr1	29397830	29398072	PotentialPeaks_H3K27Ac_peak_769	267	.	5.0019	29.0844	26.7065	133
chr1	29398226	29398574	PotentialPeaks_H3K27Ac_peak_770	112	.	3.37966	13.3529	11.2127	88
chr1	29402951	29403178	PotentialPeaks_H3K27Ac_peak_771	66	.	2.77132	8.61684	6.62356	119
chr1	29413325	29413490	PotentialPeaks_H3K27Ac_peak_772	48	.	2.50095	6.76809	4.85978	79
chr1	30065169	30065477	PotentialPeaks_H3K27Ac_peak_773	52	.	2.56854	7.21414	5.28312	107
chr1	30202219	30202410	PotentialPeaks_H3K27Ac_peak_774	48	.	2.50095	6.76809	4.85978	80
chr1	30202505	30202768	PotentialPeaks_H3K27Ac_peak_775	57	.	2.63614	7.67112	5.71846	134
chr1	30254994	30255179	PotentialPeaks_H3K27Ac_peak_776	311	.	5.40746	33.5885	31.1693	83
chr1	30256227	30256449	PotentialPeaks_H3K27Ac_peak_777	52	.	2.56854	7.21414	5.28312	87
chr1	30256559	30256761	PotentialPeaks_H3K27Ac_peak_778	112	.	3.37966	13.3529	11.2127	118
chr1	30257122	30257320	PotentialPeaks_H3K27Ac_peak_779	44	.	2.43336	6.33322	4.44884	123
chr1	30261391	30261718	PotentialPeaks_H3K27Ac_peak_780	61	.	2.70373	8.13877	6.16537	108
chr1	30262383	30262557	PotentialPeaks_H3K27Ac_peak_781	57	.	2.63614	7.67112	5.71846	110
chr1	30273544	30273733	PotentialPeaks_H3K27Ac_peak_782	29	.	2.16298	4.71138	2.93583	51
chr1	30418520	30418862	PotentialPeaks_H3K27Ac_peak_783	106	.	3.31207	12.7905	10.6643	214
chr1	30419664	30419910	PotentialPeaks_H3K27Ac_peak_784	85	.	3.0417	10.6288	8.56398	104
chr1	30446812	30446967	PotentialPeaks_H3K27Ac_peak_785	70	.	2.83892	9.10511	7.09274	105
chr1	30459872	30460035	PotentialPeaks_H3K27Ac_peak_786	47	.	2.05269	6.68741	4.78947	122
chr1	30460702	30461069	PotentialPeaks_H3K27Ac_peak_787	169	.	3.0638	19.1777	16.9244	223
chr1	30461283	30461579	PotentialPeaks_H3K27Ac_peak_788	431	.	4.61263	45.7062	43.1997	146
chr1	30461674	30461833	PotentialPeaks_H3K27Ac_peak_789	74	.	2.31484	9.44926	7.42707	38
chr1	30462235	30463244	PotentialPeaks_H3K27Ac_peak_790	244	.	3.58597	26.8026	24.4489	436
chr1	30477139	30477415	PotentialPeaks_H3K27Ac_peak_791	66	.	2.77132	8.61684	6.62356	176
chr1	30550066	30550267	PotentialPeaks_H3K27Ac_peak_792	165	.	3.988	18.7776	16.5301	106
chr1	30550368	30550804	PotentialPeaks_H3K27Ac_peak_793	40	.	2.36576	5.90982	4.05058	25
chr1	30559081	30560076	PotentialPeaks_H3K27Ac_peak_794	219	.	4.34798	24.3113	21.9859	868
chr1	30560328	30560530	PotentialPeaks_H3K27Ac_peak_795	30	.	2.14952	4.86578	3.08296	156
chr1	30560893	30561156	PotentialPeaks_H3K27Ac_peak_796	40	.	2.34518	5.94666	4.08595	89
chr1	30593503	30593661	PotentialPeaks_H3K27Ac_peak_797	75	.	2.90651	9.60334	7.57276	86
chr1	30596630	30596825	PotentialPeaks_H3K27Ac_peak_798	95	.	3.17688	11.6917	9.59507	93
chr1	30610751	30610901	PotentialPeaks_H3K27Ac_peak_799	22	.	2.0278	3.97542	2.26388	68
chr1	30620903	30621389	PotentialPeaks_H3K27Ac_peak_800	190	.	4.25838	21.3819	19.0948	379
chr1	30621539	30621792	PotentialPeaks_H3K27Ac_peak_801	29	.	2.16298	4.71138	2.93583	224
chr1	30622193	30622430	PotentialPeaks_H3K27Ac_peak_802	177	.	4.12319	20.0658	17.798	89
chr1	30638412	30638562	PotentialPeaks_H3K27Ac_peak_803	36	.	2.16113	5.44336	3.62303	70
chr1	30639503	30639695	PotentialPeaks_H3K27Ac_peak_804	56	.	2.41597	7.58139	5.63777	116
chr1	30640149	30640504	PotentialPeaks_H3K27Ac_peak_805	142	.	3.3747	16.483	14.2763	126
chr1	30696479	30696652	PotentialPeaks_H3K27Ac_peak_806	29	.	2.16298	4.71138	2.93583	43
chr1	30696877	30697027	PotentialPeaks_H3K27Ac_peak_807	40	.	2.36576	5.90982	4.05058	24
chr1	30716939	30717122	PotentialPeaks_H3K27Ac_peak_808	123	.	3.51485	14.503	12.3362	60
chr1	30807073	30807315	PotentialPeaks_H3K27Ac_peak_809	70	.	2.83892	9.10511	7.09274	82
chr1	30808353	30808839	PotentialPeaks_H3K27Ac_peak_810	106	.	3.31207	12.7905	10.6643	361
chr1	30903938	30904188	PotentialPeaks_H3K27Ac_peak_811	75	.	2.90651	9.60334	7.57276	129
chr1	30929635	30931152	PotentialPeaks_H3K27Ac_peak_812	7301	.	10.3677	733.964	730.196	705
chr1	31005805	31006513	PotentialPeaks_H3K27Ac_peak_813	12174	.	13.5095	1221.83	1217.43	479
chr1	31006691	31007281	PotentialPeaks_H3K27Ac_peak_814	7256	.	9.78333	729.428	725.667	169
chr1	31007389	31007599	PotentialPeaks_H3K27Ac_peak_815	157	.	1.87915	17.9947	15.7612	96
chr1	31205660	31205915	PotentialPeaks_H3K27Ac_peak_816	36	.	2.29817	5.49817	3.66539	190
chr1	31206685	31207282	PotentialPeaks_H3K27Ac_peak_817	52	.	2.56854	7.21414	5.28312	300
chr1	31212329	31212482	PotentialPeaks_H3K27Ac_peak_818	48	.	2.50095	6.76809	4.85978	88
chr1	31212619	31212792	PotentialPeaks_H3K27Ac_peak_819	101	.	3.24448	12.2367	10.125	122
chr1	31213459	31213986	PotentialPeaks_H3K27Ac_peak_820	48	.	2.50095	6.76809	4.85978	64
chr1	31253471	31253746	PotentialPeaks_H3K27Ac_peak_821	48	.	2.50095	6.76809	4.85978	207
chr1	32229110	32229439	PotentialPeaks_H3K27Ac_peak_822	100	.	3.10886	12.1593	10.0519	208
chr1	32229581	32230103	PotentialPeaks_H3K27Ac_peak_823	1117	.	10.4155	114.473	111.702	202
chr1	32230359	32230513	PotentialPeaks_H3K27Ac_peak_824	34	.	2.16789	5.26354	3.4513	30
chr1	32231671	32232019	PotentialPeaks_H3K27Ac_peak_825	56	.	2.47329	7.61443	5.66964	267
chr1	32280224	32280407	PotentialPeaks_H3K27Ac_peak_826	70	.	2.83892	9.10511	7.09274	74
chr1	32343646	32344103	PotentialPeaks_H3K27Ac_peak_827	188	.	3.91167	21.0838	18.8014	140
chr1	32344223	32344700	PotentialPeaks_H3K27Ac_peak_828	154	.	3.56731	17.6788	15.4502	149
chr1	32344851	32345275	PotentialPeaks_H3K27Ac_peak_829	223	.	4.21583	24.6995	22.3699	118
chr1	32415488	32415638	PotentialPeaks_H3K27Ac_peak_830	57	.	2.63614	7.67112	5.71846	120
chr1	32639058	32639411	PotentialPeaks_H3K27Ac_peak_831	106	.	3.31207	12.7905	10.6643	227
chr1	32641535	32641796	PotentialPeaks_H3K27Ac_peak_832	57	.	2.63614	7.67112	5.71846	86
chr1	32891039	32891194	PotentialPeaks_H3K27Ac_peak_833	52	.	2.54795	7.12165	5.20057	59
chr1	32891445	32891627	PotentialPeaks_H3K27Ac_peak_834	159	.	3.92041	18.1443	15.9073	123
chr1	32892058	32892581	PotentialPeaks_H3K27Ac_peak_835	85	.	3.0417	10.6288	8.56398	115
chr1	32928715	32928884	PotentialPeaks_H3K27Ac_peak_836	48	.	2.50095	6.76809	4.85978	83
chr1	32934085	32934235	PotentialPeaks_H3K27Ac_peak_837	22	.	2.0278	3.97542	2.26388	3
chr1	32957457	32957625	PotentialPeaks_H3K27Ac_peak_838	44	.	2.43336	6.33322	4.44884	92
chr1	33099014	33099317	PotentialPeaks_H3K27Ac_peak_839	112	.	3.37966	13.3529	11.2127	145
chr1	33099531	33100092	PotentialPeaks_H3K27Ac_peak_840	85	.	3.0417	10.6288	8.56398	300
chr1	33100739	33100921	PotentialPeaks_H3K27Ac_peak_841	80	.	2.9741	10.1113	8.06329	71
chr1	33231511	33232108	PotentialPeaks_H3K27Ac_peak_842	129	.	3.58244	15.0903	12.9108	148
chr1	33247503	33247712	PotentialPeaks_H3K27Ac_peak_843	70	.	2.83892	9.10511	7.09274	104
chr1	33258092	33258383	PotentialPeaks_H3K27Ac_peak_844	302	.	5.07349	32.7098	30.2984	139
chr1	33258455	33259432	PotentialPeaks_H3K27Ac_peak_845	269	.	4.80323	29.3087	26.9287	567
chr1	33266951	33267121	PotentialPeaks_H3K27Ac_peak_846	57	.	2.54157	7.67506	5.72227	108
chr1	33269351	33269577	PotentialPeaks_H3K27Ac_peak_847	45	.	2.31445	6.42013	4.5324	100
chr1	33271033	33272342	PotentialPeaks_H3K27Ac_peak_848	96	.	3.03912	11.7836	9.68485	532
chr1	33278871	33279136	PotentialPeaks_H3K27Ac_peak_849	94	.	3.02844	11.5323	9.44225	209
chr1	33279538	33280835	PotentialPeaks_H3K27Ac_peak_850	404	.	5.90619	42.9418	40.4531	269
chr1	33281162	33281359	PotentialPeaks_H3K27Ac_peak_851	65	.	2.71474	8.51555	6.53027	54
chr1	33300525	33300864	PotentialPeaks_H3K27Ac_peak_852	57	.	2.63614	7.67112	5.71846	256
chr1	33317331	33317770	PotentialPeaks_H3K27Ac_peak_853	129	.	3.58244	15.0903	12.9108	291
chr1	33318533	33318815	PotentialPeaks_H3K27Ac_peak_854	68	.	2.69366	8.89693	6.89523	71
chr1	33322602	33322835	PotentialPeaks_H3K27Ac_peak_855	82	.	2.81055	10.3508	8.29651	122
chr1	33323996	33324239	PotentialPeaks_H3K27Ac_peak_856	44	.	2.34507	6.32163	4.44586	132
chr1	33325954	33326148	PotentialPeaks_H3K27Ac_peak_857	66	.	2.77132	8.61684	6.62356	62
chr1	33390296	33390476	PotentialPeaks_H3K27Ac_peak_858	25	.	2.09539	4.33687	2.59236	144
chr1	33391378	33391881	PotentialPeaks_H3K27Ac_peak_859	90	.	3.10929	11.1557	9.07465	240
chr1	33393049	33393241	PotentialPeaks_H3K27Ac_peak_860	32	.	2.23058	5.09859	3.29362	46
chr1	33451541	33452403	PotentialPeaks_H3K27Ac_peak_861	141	.	3.59497	16.379	14.174	324
chr1	33452637	33453117	PotentialPeaks_H3K27Ac_peak_862	259	.	4.75503	28.3431	25.9732	250
chr1	33541733	33541883	PotentialPeaks_H3K27Ac_peak_863	40	.	2.36576	5.90982	4.05058	76
chr1	33546940	33547211	PotentialPeaks_H3K27Ac_peak_864	48	.	2.50095	6.76809	4.85978	68
chr1	33551961	33552349	PotentialPeaks_H3K27Ac_peak_865	124	.	3.21224	14.6036	12.4349	254
chr1	33552950	33553189	PotentialPeaks_H3K27Ac_peak_866	44	.	2.27609	6.34722	4.46231	209
chr1	33578798	33579001	PotentialPeaks_H3K27Ac_peak_867	21	.	2.00144	3.87272	2.18247	180
chr1	33588006	33588423	PotentialPeaks_H3K27Ac_peak_868	157	.	3.78967	17.9687	15.7356	234
chr1	33588820	33589106	PotentialPeaks_H3K27Ac_peak_869	41	.	2.3521	5.97715	4.11521	81
chr1	33646456	33646623	PotentialPeaks_H3K27Ac_peak_870	50	.	2.44731	6.93742	5.023	75
chr1	33646858	33647080	PotentialPeaks_H3K27Ac_peak_871	33	.	2.134	5.10734	3.30198	102
chr1	33651432	33651798	PotentialPeaks_H3K27Ac_peak_872	75	.	2.51545	9.53947	7.51469	263
chr1	33652234	33652699	PotentialPeaks_H3K27Ac_peak_873	184	.	3.58604	20.7181	18.4415	307
chr1	33652761	33653256	PotentialPeaks_H3K27Ac_peak_874	79	.	2.63407	9.98182	7.94091	125
chr1	33655571	33656007	PotentialPeaks_H3K27Ac_peak_875	42	.	2.2217	6.06989	4.20423	89
chr1	33656747	33656923	PotentialPeaks_H3K27Ac_peak_876	52	.	2.4788	7.22629	5.29485	80
chr1	33665523	33665891	PotentialPeaks_H3K27Ac_peak_877	75	.	2.90651	9.60334	7.57276	283
chr1	33704562	33704717	PotentialPeaks_H3K27Ac_peak_878	44	.	2.43336	6.33322	4.44884	110
chr1	33726268	33727757	PotentialPeaks_H3K27Ac_peak_879	2699	.	12.3826	273.026	269.937	763
chr1	33776490	33777445	PotentialPeaks_H3K27Ac_peak_880	5362	.	15.5022	539.792	536.297	394
chr1	33790580	33791938	PotentialPeaks_H3K27Ac_peak_881	132	.	3.39402	15.4697	13.2835	141
chr1	33814194	33815008	PotentialPeaks_H3K27Ac_peak_882	3798	.	15.3391	383.141	379.876	239
chr1	33856568	33856756	PotentialPeaks_H3K27Ac_peak_883	61	.	2.70373	8.13877	6.16537	71
chr1	33870428	33871639	PotentialPeaks_H3K27Ac_peak_884	10662	.	16.1298	1070.49	1066.28	660
chr1	33963804	33965396	PotentialPeaks_H3K27Ac_peak_885	2855	.	12.7794	288.646	285.53	1030
chr1	33987874	33988052	PotentialPeaks_H3K27Ac_peak_886	61	.	2.67352	8.1585	6.18443	124
chr1	33988251	33988673	PotentialPeaks_H3K27Ac_peak_887	125	.	3.47347	14.7595	12.5879	119
chr1	33988823	33989409	PotentialPeaks_H3K27Ac_peak_888	105	.	3.1969	12.6276	10.5073	89
chr1	33989789	33989947	PotentialPeaks_H3K27Ac_peak_889	61	.	2.6253	8.0841	6.11784	87
chr1	33997740	33997907	PotentialPeaks_H3K27Ac_peak_890	40	.	2.36576	5.90982	4.05058	53
chr1	34003635	34003799	PotentialPeaks_H3K27Ac_peak_891	44	.	2.43336	6.33322	4.44884	106
chr1	34025532	34026503	PotentialPeaks_H3K27Ac_peak_892	95	.	2.62817	11.6347	9.5422	836
chr1	34026676	34026995	PotentialPeaks_H3K27Ac_peak_893	203	.	3.49431	22.6486	20.3449	172
chr1	34027156	34027482	PotentialPeaks_H3K27Ac_peak_894	132	.	2.95344	15.4046	13.2195	219
chr1	34027555	34027705	PotentialPeaks_H3K27Ac_peak_895	122	.	2.86903	14.4022	12.2391	56
chr1	34028767	34029160	PotentialPeaks_H3K27Ac_peak_896	94	.	2.68332	11.5532	9.46264	276
chr1	34049604	34049771	PotentialPeaks_H3K27Ac_peak_897	22	.	2.0278	3.97542	2.26388	93
chr1	34062358	34063613	PotentialPeaks_H3K27Ac_peak_898	1465	.	7.11414	149.367	146.511	789
chr1	34068007	34069043	PotentialPeaks_H3K27Ac_peak_899	3904	.	12.728	393.71	390.43	600
chr1	34097909	34098585	PotentialPeaks_H3K27Ac_peak_900	70	.	2.66447	9.06302	7.05642	587
chr1	34099410	34099564	PotentialPeaks_H3K27Ac_peak_901	37	.	2.18483	5.55747	3.72222	79
chr1	34109081	34109570	PotentialPeaks_H3K27Ac_peak_902	88	.	2.89124	10.9732	8.89969	353
chr1	34110873	34111144	PotentialPeaks_H3K27Ac_peak_903	43	.	2.2644	6.17143	4.30174	60
chr1	34117125	34117781	PotentialPeaks_H3K27Ac_peak_904	119	.	2.76482	14.1117	11.9544	137
chr1	34117872	34118044	PotentialPeaks_H3K27Ac_peak_905	103	.	2.63464	12.4507	10.3343	99
chr1	34119486	34119651	PotentialPeaks_H3K27Ac_peak_906	31	.	1.88082	4.90069	3.11624	66
chr1	34119806	34120254	PotentialPeaks_H3K27Ac_peak_907	121	.	2.76638	14.2912	12.1304	141
chr1	34130442	34130737	PotentialPeaks_H3K27Ac_peak_908	55	.	2.19478	7.45017	5.51101	210
chr1	34130978	34132188	PotentialPeaks_H3K27Ac_peak_909	233	.	3.75023	25.7385	23.3964	805
chr1	34134021	34134261	PotentialPeaks_H3K27Ac_peak_910	50	.	2.32303	6.95252	5.03755	110
chr1	34142802	34142965	PotentialPeaks_H3K27Ac_peak_911	44	.	2.43336	6.33322	4.44884	36
chr1	34147926	34148223	PotentialPeaks_H3K27Ac_peak_912	37	.	2.24925	5.63645	3.79784	108
chr1	34151709	34152058	PotentialPeaks_H3K27Ac_peak_913	96	.	2.9288	11.7321	9.63446	66
chr1	34160097	34160736	PotentialPeaks_H3K27Ac_peak_914	529	.	4.87217	55.5249	52.964	326
chr1	34160844	34161029	PotentialPeaks_H3K27Ac_peak_915	67	.	2.18052	8.7375	6.74054	102
chr1	34163586	34164292	PotentialPeaks_H3K27Ac_peak_916	264	.	3.55003	28.8667	26.4913	469
chr1	34171357	34171636	PotentialPeaks_H3K27Ac_peak_917	59	.	2.49362	7.85968	5.90073	236
chr1	34177905	34178560	PotentialPeaks_H3K27Ac_peak_918	83	.	2.65177	10.4013	8.3457	540
chr1	34190148	34190430	PotentialPeaks_H3K27Ac_peak_919	60	.	2.54436	7.98002	6.01719	141
chr1	34190786	34190977	PotentialPeaks_H3K27Ac_peak_920	50	.	2.42796	6.97873	5.06282	74
chr1	34197219	34197524	PotentialPeaks_H3K27Ac_peak_921	37	.	2.19968	5.62882	3.79051	197
chr1	34197592	34197742	PotentialPeaks_H3K27Ac_peak_922	37	.	2.18299	5.54862	3.71376	90
chr1	34199878	34200153	PotentialPeaks_H3K27Ac_peak_923	110	.	3.14485	13.169	11.0348	99
chr1	34206936	34207698	PotentialPeaks_H3K27Ac_peak_924	451	.	5.75911	47.6394	45.1214	495
chr1	34215692	34215871	PotentialPeaks_H3K27Ac_peak_925	53	.	2.43148	7.26386	5.33114	80
chr1	34216186	34216604	PotentialPeaks_H3K27Ac_peak_926	140	.	3.45225	16.2724	14.0707	225
chr1	34224230	34224561	PotentialPeaks_H3K27Ac_peak_927	52	.	2.56854	7.21414	5.28312	221
chr1	34234841	34235120	PotentialPeaks_H3K27Ac_peak_928	97	.	2.83126	11.8579	9.75738	134
chr1	34238999	34239854	PotentialPeaks_H3K27Ac_peak_929	135	.	2.79483	15.7082	13.5161	641
chr1	34240154	34240463	PotentialPeaks_H3K27Ac_peak_930	580	.	5.30052	60.5963	58.0108	182
chr1	34245589	34245987	PotentialPeaks_H3K27Ac_peak_931	71	.	2.35462	9.12699	7.11398	127
chr1	34246040	34246308	PotentialPeaks_H3K27Ac_peak_932	64	.	2.33168	8.47462	6.49062	119
chr1	34246530	34247292	PotentialPeaks_H3K27Ac_peak_933	146	.	3.20222	16.8451	14.6325	541
chr1	34259606	34259784	PotentialPeaks_H3K27Ac_peak_934	32	.	2.23058	5.09859	3.29362	60
chr1	34272659	34273348	PotentialPeaks_H3K27Ac_peak_935	197	.	3.66254	22.0114	19.7164	556
chr1	34273680	34274217	PotentialPeaks_H3K27Ac_peak_936	98	.	2.76813	11.9619	9.85899	129
chr1	34278914	34279131	PotentialPeaks_H3K27Ac_peak_937	26	.	2.07249	4.4383	2.68873	16
chr1	34290163	34290321	PotentialPeaks_H3K27Ac_peak_938	28	.	2.05667	4.65504	2.89472	20
chr1	34293052	34293687	PotentialPeaks_H3K27Ac_peak_939	440	.	5.60877	46.5269	44.0154	482
chr1	34340919	34341189	PotentialPeaks_H3K27Ac_peak_940	80	.	2.9741	10.1113	8.06329	137
chr1	34341292	34341497	PotentialPeaks_H3K27Ac_peak_941	32	.	2.23058	5.09859	3.29362	61
chr1	34356531	34356688	PotentialPeaks_H3K27Ac_peak_942	61	.	2.70373	8.13877	6.16537	111
chr1	34359674	34359924	PotentialPeaks_H3K27Ac_peak_943	116	.	3.43001	13.8362	11.6862	149
chr1	34383543	34383761	PotentialPeaks_H3K27Ac_peak_944	29	.	2.16298	4.71138	2.93583	73
chr1	34455875	34456452	PotentialPeaks_H3K27Ac_peak_945	80	.	2.9741	10.1113	8.06329	441
chr1	34456614	34456933	PotentialPeaks_H3K27Ac_peak_946	85	.	3.0417	10.6288	8.56398	226
chr1	34459882	34460076	PotentialPeaks_H3K27Ac_peak_947	80	.	2.9741	10.1113	8.06329	79
chr1	34462163	34462338	PotentialPeaks_H3K27Ac_peak_948	57	.	2.63614	7.67112	5.71846	66
chr1	34491755	34492534	PotentialPeaks_H3K27Ac_peak_949	1902	.	8.1928	193.165	190.218	149
chr1	34495862	34496640	PotentialPeaks_H3K27Ac_peak_950	3161	.	11.1281	319.361	316.197	610
chr1	34496755	34497129	PotentialPeaks_H3K27Ac_peak_951	601	.	4.62073	62.7181	60.1228	132
chr1	34516310	34516476	PotentialPeaks_H3K27Ac_peak_952	66	.	2.77132	8.61684	6.62356	80
chr1	34516686	34517122	PotentialPeaks_H3K27Ac_peak_953	70	.	2.83892	9.10511	7.09274	96
chr1	34529574	34529793	PotentialPeaks_H3K27Ac_peak_954	106	.	3.31207	12.7905	10.6643	104
chr1	34635741	34637152	PotentialPeaks_H3K27Ac_peak_955	986	.	8.29867	101.398	98.6632	963
chr1	34699697	34700004	PotentialPeaks_H3K27Ac_peak_956	36	.	2.29817	5.49817	3.66539	239
chr1	34720770	34721094	PotentialPeaks_H3K27Ac_peak_957	136	.	2.23183	15.8061	13.6124	180
chr1	34721195	34722036	PotentialPeaks_H3K27Ac_peak_958	766	.	4.32197	79.3221	76.6591	576
chr1	34722359	34723144	PotentialPeaks_H3K27Ac_peak_959	1077	.	5.08432	110.545	107.784	446
chr1	34723613	34723932	PotentialPeaks_H3K27Ac_peak_960	180	.	2.41459	20.3694	18.0974	122
chr1	34734682	34735770	PotentialPeaks_H3K27Ac_peak_961	510	.	5.194	53.5916	51.0405	531
chr1	34735934	34736268	PotentialPeaks_H3K27Ac_peak_962	47	.	2.07132	6.62691	4.73129	80
chr1	34746500	34747170	PotentialPeaks_H3K27Ac_peak_963	60	.	2.31446	7.99732	6.03391	389
chr1	34747719	34747927	PotentialPeaks_H3K27Ac_peak_964	88	.	2.52369	10.8766	8.80553	109
chr1	34752627	34753461	PotentialPeaks_H3K27Ac_peak_965	303	.	3.66033	32.731	30.3194	633
chr1	34753738	34754384	PotentialPeaks_H3K27Ac_peak_966	330	.	3.81829	35.4992	33.0645	250
chr1	34757162	34757388	PotentialPeaks_H3K27Ac_peak_967	46	.	1.98826	6.49747	4.60685	138
chr1	34770852	34771102	PotentialPeaks_H3K27Ac_peak_968	90	.	3.10929	11.1557	9.07465	129
chr1	34777103	34777532	PotentialPeaks_H3K27Ac_peak_969	216	.	4.24858	24.0135	21.6922	304
chr1	34789037	34789353	PotentialPeaks_H3K27Ac_peak_970	44	.	2.43336	6.33322	4.44884	265
chr1	34789691	34789942	PotentialPeaks_H3K27Ac_peak_971	66	.	2.77132	8.61684	6.62356	120
chr1	34790271	34790634	PotentialPeaks_H3K27Ac_peak_972	52	.	2.56854	7.21414	5.28312	227
chr1	34796732	34796882	PotentialPeaks_H3K27Ac_peak_973	32	.	2.23058	5.09859	3.29362	36
chr1	34797061	34797270	PotentialPeaks_H3K27Ac_peak_974	29	.	2.16298	4.71138	2.93583	94
chr1	34797868	34798096	PotentialPeaks_H3K27Ac_peak_975	66	.	2.77132	8.61684	6.62356	109
chr1	34806167	34806368	PotentialPeaks_H3K27Ac_peak_976	77	.	2.4823	9.74298	7.70853	99
chr1	34806718	34808108	PotentialPeaks_H3K27Ac_peak_977	1526	.	10.1979	155.522	152.653	925
chr1	34825688	34826149	PotentialPeaks_H3K27Ac_peak_978	90	.	3.10929	11.1557	9.07465	106
chr1	34840735	34840955	PotentialPeaks_H3K27Ac_peak_979	94	.	3.07443	11.5787	9.48751	114
chr1	34841140	34841475	PotentialPeaks_H3K27Ac_peak_980	120	.	3.37539	14.2337	12.0739	91
chr1	34850023	34850394	PotentialPeaks_H3K27Ac_peak_981	80	.	2.9741	10.1113	8.06329	202
chr1	34850716	34851072	PotentialPeaks_H3K27Ac_peak_982	101	.	3.24448	12.2367	10.125	257
chr1	34858176	34859422	PotentialPeaks_H3K27Ac_peak_983	2857	.	12.9083	288.887	285.771	534
chr1	34868210	34868380	PotentialPeaks_H3K27Ac_peak_984	46	.	2.34838	6.58795	4.69379	68
chr1	34898594	34898843	PotentialPeaks_H3K27Ac_peak_985	67	.	1.71022	8.74416	6.74702	101
chr1	34898910	34900453	PotentialPeaks_H3K27Ac_peak_986	14403	.	19.9965	1445.02	1440.36	819
chr1	34906549	34907328	PotentialPeaks_H3K27Ac_peak_987	4771	.	19.653	480.581	477.172	393
chr1	34983426	34983576	PotentialPeaks_H3K27Ac_peak_988	40	.	2.36576	5.90982	4.05058	69
chr1	35044507	35044666	PotentialPeaks_H3K27Ac_peak_989	36	.	2.29817	5.49817	3.66539	20
chr1	35059616	35059829	PotentialPeaks_H3K27Ac_peak_990	25	.	2.09539	4.33687	2.59236	77
chr1	35059912	35060224	PotentialPeaks_H3K27Ac_peak_991	123	.	3.51485	14.503	12.3362	126
chr1	35060438	35061052	PotentialPeaks_H3K27Ac_peak_992	90	.	3.10929	11.1557	9.07465	137
chr1	35257503	35259133	PotentialPeaks_H3K27Ac_peak_993	121	.	3.19216	14.2723	12.1118	923
chr1	35259247	35259728	PotentialPeaks_H3K27Ac_peak_994	153	.	3.593	17.5909	15.3637	242
chr1	35268798	35269388	PotentialPeaks_H3K27Ac_peak_995	106	.	3.31207	12.7905	10.6643	375
chr1	35288863	35289472	PotentialPeaks_H3K27Ac_peak_996	52	.	2.56854	7.21414	5.28312	304
chr1	35299323	35300530	PotentialPeaks_H3K27Ac_peak_997	183	.	3.50603	20.6165	18.3412	514
chr1	35300615	35301013	PotentialPeaks_H3K27Ac_peak_998	282	.	4.29063	30.5981	28.2056	119
chr1	35313444	35313654	PotentialPeaks_H3K27Ac_peak_999	45	.	2.43662	6.48225	4.59218	66
chr1	35313723	35314112	PotentialPeaks_H3K27Ac_peak_1000	30	.	2.16461	4.82423	3.04335	137
chr1	35314212	35314540	PotentialPeaks_H3K27Ac_peak_1001	61	.	2.66567	8.12141	6.15389	80
chr1	35314702	35315014	PotentialPeaks_H3K27Ac_peak_1002	188	.	4.15291	21.0975	18.8149	143
chr1	35315324	35315527	PotentialPeaks_H3K27Ac_peak_1003	66	.	2.70308	8.62146	6.62801	73
chr1	35323189	35323495	PotentialPeaks_H3K27Ac_peak_1004	61	.	2.70373	8.13877	6.16537	220
chr1	35335048	35335260	PotentialPeaks_H3K27Ac_peak_1005	40	.	2.36576	5.90982	4.05058	70
chr1	35335320	35335470	PotentialPeaks_H3K27Ac_peak_1006	25	.	2.09539	4.33687	2.59236	44
chr1	35335909	35336095	PotentialPeaks_H3K27Ac_peak_1007	52	.	2.56854	7.21414	5.28312	111
chr1	35405240	35405719	PotentialPeaks_H3K27Ac_peak_1008	66	.	2.77132	8.61684	6.62356	176
chr1	35415443	35415863	PotentialPeaks_H3K27Ac_peak_1009	126	.	3.39186	14.7765	12.6045	91
chr1	35416184	35416511	PotentialPeaks_H3K27Ac_peak_1010	123	.	3.38062	14.4879	12.3232	212
chr1	35441452	35441676	PotentialPeaks_H3K27Ac_peak_1011	114	.	2.72439	13.6263	11.4806	78
chr1	35442085	35442310	PotentialPeaks_H3K27Ac_peak_1012	83	.	2.40275	10.3749	8.32002	119
chr1	35442547	35443466	PotentialPeaks_H3K27Ac_peak_1013	469	.	4.78203	49.4385	46.9101	274
chr1	35447950	35448212	PotentialPeaks_H3K27Ac_peak_1014	41	.	1.94117	5.99409	4.13154	141
chr1	35449726	35449907	PotentialPeaks_H3K27Ac_peak_1015	78	.	2.44582	9.90081	7.8621	124
chr1	35450105	35450469	PotentialPeaks_H3K27Ac_peak_1016	139	.	3.03083	16.1838	13.9836	137
chr1	35450969	35451422	PotentialPeaks_H3K27Ac_peak_1017	192	.	3.5055	21.5585	19.2692	356
chr1	35457498	35457746	PotentialPeaks_H3K27Ac_peak_1018	54	.	2.4894	7.41772	5.47964	174
chr1	35457863	35458013	PotentialPeaks_H3K27Ac_peak_1019	49	.	2.40863	6.88416	4.97165	60
chr1	35458384	35458786	PotentialPeaks_H3K27Ac_peak_1020	81	.	2.81876	10.2229	8.17195	226
chr1	35461499	35461659	PotentialPeaks_H3K27Ac_peak_1021	52	.	2.48625	7.12264	5.20149	131
chr1	35471893	35472043	PotentialPeaks_H3K27Ac_peak_1022	19	.	1.9602	3.62739	1.95085	43
chr1	35472398	35473260	PotentialPeaks_H3K27Ac_peak_1023	252	.	4.86672	27.6286	25.2655	110
chr1	35473415	35473780	PotentialPeaks_H3K27Ac_peak_1024	177	.	4.12319	20.0658	17.798	124
chr1	35484133	35484338	PotentialPeaks_H3K27Ac_peak_1025	32	.	2.23058	5.09859	3.29362	81
chr1	35484570	35484782	PotentialPeaks_H3K27Ac_peak_1026	36	.	2.29817	5.49817	3.66539	103
chr1	35484950	35485160	PotentialPeaks_H3K27Ac_peak_1027	80	.	2.9741	10.1113	8.06329	71
chr1	35485612	35485927	PotentialPeaks_H3K27Ac_peak_1028	85	.	3.0417	10.6288	8.56398	171
chr1	35509229	35509703	PotentialPeaks_H3K27Ac_peak_1029	110	.	2.67478	13.2328	11.0973	291
chr1	35510014	35510554	PotentialPeaks_H3K27Ac_peak_1030	292	.	3.58657	31.6708	29.2686	434
chr1	35513460	35513908	PotentialPeaks_H3K27Ac_peak_1031	151	.	2.62633	17.4223	15.1991	82
chr1	35514116	35514391	PotentialPeaks_H3K27Ac_peak_1032	166	.	2.71534	18.8867	16.6377	138
chr1	35514726	35515576	PotentialPeaks_H3K27Ac_peak_1033	352	.	3.73992	37.6997	35.2479	398
chr1	35520558	35520884	PotentialPeaks_H3K27Ac_peak_1034	61	.	2.14387	8.13572	6.16537	71
chr1	35524946	35525712	PotentialPeaks_H3K27Ac_peak_1035	107	.	2.45156	12.9073	10.7786	448
chr1	35525779	35527052	PotentialPeaks_H3K27Ac_peak_1036	160	.	2.88403	18.2642	16.0254	325
chr1	35552586	35553168	PotentialPeaks_H3K27Ac_peak_1037	177	.	4.12319	20.0658	17.798	211
chr1	35553510	35553934	PotentialPeaks_H3K27Ac_peak_1038	90	.	3.10929	11.1557	9.07465	106
chr1	35567064	35567376	PotentialPeaks_H3K27Ac_peak_1039	75	.	2.90651	9.60334	7.57276	89
chr1	35572743	35573041	PotentialPeaks_H3K27Ac_peak_1040	85	.	3.0417	10.6288	8.56398	103
chr1	35573353	35573607	PotentialPeaks_H3K27Ac_peak_1041	75	.	2.90651	9.60334	7.57276	181
chr1	35584306	35584808	PotentialPeaks_H3K27Ac_peak_1042	117	.	3.06791	13.9093	11.7579	404
chr1	35585143	35585776	PotentialPeaks_H3K27Ac_peak_1043	256	.	4.3062	27.9958	25.6291	502
chr1	35586230	35586552	PotentialPeaks_H3K27Ac_peak_1044	126	.	3.24626	14.8107	12.638	208
chr1	35619228	35619388	PotentialPeaks_H3K27Ac_peak_1045	29	.	2.16298	4.71138	2.93583	28
chr1	35630104	35630367	PotentialPeaks_H3K27Ac_peak_1046	39	.	2.33033	5.75741	3.91365	138
chr1	35630555	35630749	PotentialPeaks_H3K27Ac_peak_1047	31	.	2.19058	4.93244	3.14648	60
chr1	35642306	35642590	PotentialPeaks_H3K27Ac_peak_1048	56	.	2.45067	7.63319	5.68778	94
chr1	35642674	35642964	PotentialPeaks_H3K27Ac_peak_1049	91	.	2.88162	11.2782	9.19417	144
chr1	35645523	35645694	PotentialPeaks_H3K27Ac_peak_1050	60	.	2.5856	8.04063	6.07578	80
chr1	35671914	35672120	PotentialPeaks_H3K27Ac_peak_1051	52	.	2.56854	7.21414	5.28312	91
chr1	35687049	35687633	PotentialPeaks_H3K27Ac_peak_1052	104	.	2.91003	12.5319	10.4137	132
chr1	35688460	35688811	PotentialPeaks_H3K27Ac_peak_1053	66	.	2.55948	8.64553	6.65137	295
chr1	35699091	35699308	PotentialPeaks_H3K27Ac_peak_1054	66	.	2.77132	8.61684	6.62356	119
chr1	35699698	35700251	PotentialPeaks_H3K27Ac_peak_1055	274	.	5.0695	29.8211	27.4359	303
chr1	35709927	35710423	PotentialPeaks_H3K27Ac_peak_1056	65	.	2.64812	8.50726	6.52225	438
chr1	35710535	35710696	PotentialPeaks_H3K27Ac_peak_1057	64	.	2.6338	8.43496	6.4522	61
chr1	35730340	35730601	PotentialPeaks_H3K27Ac_peak_1058	57	.	2.63614	7.67112	5.71846	138
chr1	35736458	35736667	PotentialPeaks_H3K27Ac_peak_1059	47	.	2.4784	6.66817	4.77095	75
chr1	35750882	35751686	PotentialPeaks_H3K27Ac_peak_1060	485	.	4.75191	51.1362	48.5983	590
chr1	35751777	35752100	PotentialPeaks_H3K27Ac_peak_1061	271	.	3.6426	29.5603	27.178	204
chr1	35752240	35752565	PotentialPeaks_H3K27Ac_peak_1062	124	.	2.70446	14.5938	12.4253	123
chr1	35754816	35754966	PotentialPeaks_H3K27Ac_peak_1063	61	.	2.19659	8.11117	6.144	70
chr1	35776828	35777011	PotentialPeaks_H3K27Ac_peak_1064	61	.	2.58031	8.16357	6.18933	65
chr1	35778609	35778787	PotentialPeaks_H3K27Ac_peak_1065	42	.	2.28127	6.13722	4.26885	137
chr1	35781188	35781338	PotentialPeaks_H3K27Ac_peak_1066	50	.	2.44956	6.94818	5.03339	53
chr1	35781509	35781717	PotentialPeaks_H3K27Ac_peak_1067	50	.	2.42364	6.9576	5.04246	129
chr1	35841866	35842119	PotentialPeaks_H3K27Ac_peak_1068	48	.	2.50095	6.76809	4.85978	126
chr1	35842229	35842473	PotentialPeaks_H3K27Ac_peak_1069	48	.	2.50095	6.76809	4.85978	70
chr1	35860001	35860163	PotentialPeaks_H3K27Ac_peak_1070	58	.	2.43006	7.7912	5.83454	105
chr1	35862647	35862843	PotentialPeaks_H3K27Ac_peak_1071	34	.	2.02856	5.25535	3.44347	68
chr1	35863123	35863303	PotentialPeaks_H3K27Ac_peak_1072	77	.	2.51184	9.79968	7.76373	102
chr1	35864093	35864297	PotentialPeaks_H3K27Ac_peak_1073	64	.	2.30721	8.4319	6.44927	100
chr1	35867838	35868007	PotentialPeaks_H3K27Ac_peak_1074	51	.	2.22465	7.09088	5.17088	34
chr1	35868452	35868889	PotentialPeaks_H3K27Ac_peak_1075	107	.	2.90302	12.8496	10.7221	302
chr1	35881542	35881694	PotentialPeaks_H3K27Ac_peak_1076	48	.	2.40957	6.757	4.85646	66
chr1	35898302	35898452	PotentialPeaks_H3K27Ac_peak_1077	36	.	2.29817	5.49817	3.66539	28
chr1	35907076	35907305	PotentialPeaks_H3K27Ac_peak_1078	61	.	2.38776	8.07335	6.10745	110
chr1	35912107	35912411	PotentialPeaks_H3K27Ac_peak_1079	35	.	2.11759	5.33377	3.51835	190
chr1	35912872	35913066	PotentialPeaks_H3K27Ac_peak_1080	45	.	2.31445	6.42013	4.5324	105
chr1	35913154	35913436	PotentialPeaks_H3K27Ac_peak_1081	63	.	2.5909	8.36785	6.38715	124
chr1	35926138	35926701	PotentialPeaks_H3K27Ac_peak_1082	638	.	6.75805	66.5085	63.8964	169
chr1	35926767	35927961	PotentialPeaks_H3K27Ac_peak_1083	151	.	3.36643	17.3283	15.1066	211
chr1	35932645	35933036	PotentialPeaks_H3K27Ac_peak_1084	134	.	3.387	15.6551	13.4656	256
chr1	35935590	35935769	PotentialPeaks_H3K27Ac_peak_1085	19	.	1.87721	3.61265	1.95085	73
chr1	35944314	35944464	PotentialPeaks_H3K27Ac_peak_1086	33	.	2.22143	5.17291	3.36469	128
chr1	35947172	35947334	PotentialPeaks_H3K27Ac_peak_1087	36	.	2.28667	5.44961	3.62902	114
chr1	35959380	35959718	PotentialPeaks_H3K27Ac_peak_1088	148	.	3.43835	17.1131	14.8948	131
chr1	35962042	35962663	PotentialPeaks_H3K27Ac_peak_1089	65	.	2.41998	8.52963	6.54392	240
chr1	35963327	35963751	PotentialPeaks_H3K27Ac_peak_1090	56	.	2.3096	7.60488	5.66044	182
chr1	35976476	35976910	PotentialPeaks_H3K27Ac_peak_1091	180	.	3.66556	20.2799	18.0092	310
chr1	35977337	35977527	PotentialPeaks_H3K27Ac_peak_1092	80	.	2.65356	10.1	8.05593	67
chr1	35977862	35978012	PotentialPeaks_H3K27Ac_peak_1093	23	.	1.87275	4.11402	2.39516	63
chr1	35982779	35983119	PotentialPeaks_H3K27Ac_peak_1094	74	.	2.50023	9.4422	7.4202	221
chr1	35983192	35983719	PotentialPeaks_H3K27Ac_peak_1095	76	.	2.54123	9.70377	7.6704	264
chr1	35991628	35991788	PotentialPeaks_H3K27Ac_peak_1096	40	.	2.18344	5.87387	4.0252	39
chr1	35998461	35999228	PotentialPeaks_H3K27Ac_peak_1097	145	.	2.96232	16.7762	14.5648	571
chr1	36000103	36000379	PotentialPeaks_H3K27Ac_peak_1098	72	.	2.31816	9.23256	7.21652	142
chr1	36001743	36001997	PotentialPeaks_H3K27Ac_peak_1099	135	.	2.87544	15.6953	13.5035	141
chr1	36014944	36015280	PotentialPeaks_H3K27Ac_peak_1100	108	.	2.91976	12.9584	10.8287	99
chr1	36019052	36019419	PotentialPeaks_H3K27Ac_peak_1101	90	.	2.89358	11.1666	9.08519	127
chr1	36039102	36039380	PotentialPeaks_H3K27Ac_peak_1102	92	.	3.03147	11.3547	9.26886	146
chr1	36039662	36039951	PotentialPeaks_H3K27Ac_peak_1103	37	.	2.24105	5.59898	3.76196	103
chr1	36059102	36059252	PotentialPeaks_H3K27Ac_peak_1104	29	.	1.64899	4.72667	2.95043	124
chr1	36059602	36061713	PotentialPeaks_H3K27Ac_peak_1105	496	.	3.97865	52.1459	49.6026	797
chr1	36065773	36065950	PotentialPeaks_H3K27Ac_peak_1106	65	.	2.15387	8.52292	6.5374	117
chr1	36066255	36066555	PotentialPeaks_H3K27Ac_peak_1107	55	.	2.13713	7.47396	5.534	242
chr1	36073533	36074094	PotentialPeaks_H3K27Ac_peak_1108	1020	.	5.29264	104.817	102.072	264
chr1	36074345	36075391	PotentialPeaks_H3K27Ac_peak_1109	761	.	4.59348	78.8239	76.1627	315
chr1	36087383	36088101	PotentialPeaks_H3K27Ac_peak_1110	112	.	3.37966	13.3529	11.2127	307
chr1	36116829	36117251	PotentialPeaks_H3K27Ac_peak_1111	107	.	2.22846	12.8899	10.7616	289
chr1	36117600	36117986	PotentialPeaks_H3K27Ac_peak_1112	118	.	2.23044	14.0192	11.8636	244
chr1	36119576	36119769	PotentialPeaks_H3K27Ac_peak_1113	37	.	1.67396	5.55504	3.71989	65
chr1	36121349	36121778	PotentialPeaks_H3K27Ac_peak_1114	527	.	3.06049	55.3436	52.7835	277
chr1	36125206	36126401	PotentialPeaks_H3K27Ac_peak_1115	2316	.	6.55612	234.693	231.669	465
chr1	36134241	36134639	PotentialPeaks_H3K27Ac_peak_1116	61	.	2.31401	8.11539	6.14813	29
chr1	36135050	36135299	PotentialPeaks_H3K27Ac_peak_1117	62	.	2.35396	8.24708	6.2702	114
chr1	36144618	36144809	PotentialPeaks_H3K27Ac_peak_1118	29	.	1.87075	4.76617	2.98804	85
chr1	36144983	36145967	PotentialPeaks_H3K27Ac_peak_1119	232	.	3.64112	25.5779	23.2374	524
chr1	36146130	36146407	PotentialPeaks_H3K27Ac_peak_1120	104	.	2.66497	12.527	10.4089	108
chr1	36146758	36146929	PotentialPeaks_H3K27Ac_peak_1121	51	.	2.13187	7.03171	5.11387	95
chr1	36147081	36147500	PotentialPeaks_H3K27Ac_peak_1122	65	.	2.27144	8.53781	6.55185	208
chr1	36147660	36147810	PotentialPeaks_H3K27Ac_peak_1123	36	.	1.93131	5.44716	3.62667	32
chr1	36152672	36153024	PotentialPeaks_H3K27Ac_peak_1124	37	.	2.18483	5.55747	3.72222	255
chr1	36171190	36171639	PotentialPeaks_H3K27Ac_peak_1125	90	.	3.10929	11.1557	9.07465	213
chr1	36181020	36181988	PotentialPeaks_H3K27Ac_peak_1126	346	.	4.88656	37.0615	34.6146	188
chr1	36182264	36182512	PotentialPeaks_H3K27Ac_peak_1127	62	.	2.44075	8.25386	6.27679	125
chr1	36188587	36188750	PotentialPeaks_H3K27Ac_peak_1128	45	.	2.41744	6.39658	4.5098	89
chr1	36257258	36257454	PotentialPeaks_H3K27Ac_peak_1129	57	.	2.63614	7.67112	5.71846	79
chr1	36287331	36287604	PotentialPeaks_H3K27Ac_peak_1130	61	.	2.70373	8.13877	6.16537	213
chr1	36300446	36301182	PotentialPeaks_H3K27Ac_peak_1131	4806	.	18.1195	484.094	480.679	492
chr1	36307635	36307825	PotentialPeaks_H3K27Ac_peak_1132	52	.	2.56854	7.21414	5.28312	43
chr1	36326323	36326614	PotentialPeaks_H3K27Ac_peak_1133	82	.	2.98119	10.3344	8.2806	179
chr1	36329979	36330683	PotentialPeaks_H3K27Ac_peak_1134	113	.	3.24703	13.5329	11.389	197
chr1	36360103	36360401	PotentialPeaks_H3K27Ac_peak_1135	176	.	4.04289	19.9145	17.6497	181
chr1	36364606	36365109	PotentialPeaks_H3K27Ac_peak_1136	701	.	7.96357	72.8345	70.1962	110
chr1	36403351	36403701	PotentialPeaks_H3K27Ac_peak_1137	52	.	2.56854	7.21414	5.28312	298
chr1	36425285	36426062	PotentialPeaks_H3K27Ac_peak_1138	8288	.	22.8135	832.751	828.848	597
chr1	36457965	36458510	PotentialPeaks_H3K27Ac_peak_1139	366	.	5.88061	39.0867	36.6245	309
chr1	36501454	36502171	PotentialPeaks_H3K27Ac_peak_1140	7677	.	24.3388	771.523	767.703	513
chr1	36502314	36502805	PotentialPeaks_H3K27Ac_peak_1141	403	.	4.22941	42.8611	40.3729	85
chr1	36527889	36529099	PotentialPeaks_H3K27Ac_peak_1142	1854	.	10.8249	188.416	185.478	320
chr1	36568393	36568551	PotentialPeaks_H3K27Ac_peak_1143	85	.	2.02868	10.6314	8.56646	78
chr1	36568650	36569851	PotentialPeaks_H3K27Ac_peak_1144	10098	.	21.2986	1013.95	1009.81	222
chr1	36585436	36585640	PotentialPeaks_H3K27Ac_peak_1145	128	.	3.48049	15.0317	12.855	130
chr1	36596104	36596346	PotentialPeaks_H3K27Ac_peak_1146	140	.	3.71763	16.2889	14.0854	139
chr1	36603617	36604078	PotentialPeaks_H3K27Ac_peak_1147	3421	.	15.1847	345.404	342.198	292
chr1	36604298	36604870	PotentialPeaks_H3K27Ac_peak_1148	404	.	4.43545	42.937	40.4483	304
chr1	36612773	36615139	PotentialPeaks_H3K27Ac_peak_1149	7301	.	6.62259	733.958	730.189	2110
chr1	36624822	36625275	PotentialPeaks_H3K27Ac_peak_1150	210	.	4.09994	23.38	21.0668	336
chr1	36626640	36626868	PotentialPeaks_H3K27Ac_peak_1151	36	.	2.17932	5.53094	3.69679	17
chr1	36636671	36638083	PotentialPeaks_H3K27Ac_peak_1152	1602	.	8.17954	163.145	160.259	391
chr1	36645427	36645577	PotentialPeaks_H3K27Ac_peak_1153	35	.	2.05423	5.39416	3.57606	57
chr1	36645748	36646441	PotentialPeaks_H3K27Ac_peak_1154	122	.	3.02404	14.4004	12.2374	183
chr1	36646582	36646843	PotentialPeaks_H3K27Ac_peak_1155	103	.	2.87604	12.4952	10.3778	170
chr1	36652251	36652997	PotentialPeaks_H3K27Ac_peak_1156	147	.	3.5299	16.9714	14.7553	567
chr1	36653193	36653451	PotentialPeaks_H3K27Ac_peak_1157	498	.	6.36881	52.3804	49.8358	134
chr1	36659959	36660163	PotentialPeaks_H3K27Ac_peak_1158	52	.	2.56854	7.21414	5.28312	61
chr1	36660413	36660605	PotentialPeaks_H3K27Ac_peak_1159	70	.	2.83892	9.10511	7.09274	117
chr1	36668457	36668669	PotentialPeaks_H3K27Ac_peak_1160	90	.	3.10929	11.1557	9.07465	111
chr1	36684312	36684652	PotentialPeaks_H3K27Ac_peak_1161	57	.	2.63614	7.67112	5.71846	119
chr1	36685032	36685624	PotentialPeaks_H3K27Ac_peak_1162	80	.	2.94013	10.133	8.08439	187
chr1	36693667	36693925	PotentialPeaks_H3K27Ac_peak_1163	42	.	2.3802	6.10071	4.23383	57
chr1	36715766	36716167	PotentialPeaks_H3K27Ac_peak_1164	85	.	3.0417	10.6288	8.56398	288
chr1	36722112	36722293	PotentialPeaks_H3K27Ac_peak_1165	70	.	2.83892	9.10511	7.09274	139
chr1	36722472	36723187	PotentialPeaks_H3K27Ac_peak_1166	75	.	2.90651	9.60334	7.57276	110
chr1	36724232	36724480	PotentialPeaks_H3K27Ac_peak_1167	75	.	2.90651	9.60334	7.57276	128
chr1	36739718	36739875	PotentialPeaks_H3K27Ac_peak_1168	25	.	2.09539	4.33687	2.59236	25
chr1	36747747	36749193	PotentialPeaks_H3K27Ac_peak_1169	5348	.	16.9202	538.368	534.875	816
chr1	36753991	36754178	PotentialPeaks_H3K27Ac_peak_1170	25	.	2.09539	4.33687	2.59236	53
chr1	36766090	36766871	PotentialPeaks_H3K27Ac_peak_1171	11557	.	23.4171	1160.11	1155.79	555
chr1	36767051	36767316	PotentialPeaks_H3K27Ac_peak_1172	143	.	2.35338	16.5633	14.3552	159
chr1	36780081	36780782	PotentialPeaks_H3K27Ac_peak_1173	327	.	5.3636	35.2252	32.7926	503
chr1	36781071	36781672	PotentialPeaks_H3K27Ac_peak_1174	216	.	4.39154	23.9512	21.6307	418
chr1	36801167	36801346	PotentialPeaks_H3K27Ac_peak_1175	61	.	2.70373	8.13877	6.16537	130
chr1	36841814	36842031	PotentialPeaks_H3K27Ac_peak_1176	52	.	2.56854	7.21414	5.28312	89
chr1	36842183	36842346	PotentialPeaks_H3K27Ac_peak_1177	44	.	2.43336	6.33322	4.44884	37
chr1	36887808	36888644	PotentialPeaks_H3K27Ac_peak_1178	210	.	4.46116	23.4067	21.0925	571
chr1	36917245	36917709	PotentialPeaks_H3K27Ac_peak_1179	56	.	2.5484	7.56246	5.61948	169
chr1	36918443	36919044	PotentialPeaks_H3K27Ac_peak_1180	140	.	3.71763	16.2889	14.0854	229
chr1	36931718	36932258	PotentialPeaks_H3K27Ac_peak_1181	52	.	2.56854	7.21414	5.28312	115
chr1	36941982	36942175	PotentialPeaks_H3K27Ac_peak_1182	41	.	2.32811	5.99474	4.13215	131
chr1	36942835	36942985	PotentialPeaks_H3K27Ac_peak_1183	31	.	2.17019	4.95425	3.16724	108
chr1	36960744	36960914	PotentialPeaks_H3K27Ac_peak_1184	40	.	2.36576	5.90982	4.05058	46
chr1	36961331	36961707	PotentialPeaks_H3K27Ac_peak_1185	52	.	2.56854	7.21414	5.28312	75
chr1	36962216	36962366	PotentialPeaks_H3K27Ac_peak_1186	29	.	2.16298	4.71138	2.93583	48
chr1	36976768	36976923	PotentialPeaks_H3K27Ac_peak_1187	69	.	2.5652	8.97206	6.96813	100
chr1	36977058	36977231	PotentialPeaks_H3K27Ac_peak_1188	66	.	2.53741	8.66821	6.67337	72
chr1	36977574	36977832	PotentialPeaks_H3K27Ac_peak_1189	92	.	2.83706	11.3705	9.28429	121
chr1	36978381	36978847	PotentialPeaks_H3K27Ac_peak_1190	91	.	2.82171	11.2785	9.19453	310
chr1	36995764	36997234	PotentialPeaks_H3K27Ac_peak_1191	18257	.	19.7735	1830.76	1825.71	869
chr1	37006246	37006842	PotentialPeaks_H3K27Ac_peak_1192	57	.	2.63614	7.67112	5.71846	244
chr1	37019632	37019937	PotentialPeaks_H3K27Ac_peak_1193	40	.	2.36576	5.90982	4.05058	189
chr1	37044040	37044518	PotentialPeaks_H3K27Ac_peak_1194	85	.	3.0417	10.6288	8.56398	96
chr1	37053334	37053518	PotentialPeaks_H3K27Ac_peak_1195	44	.	2.43336	6.33322	4.44884	58
chr1	37053704	37053944	PotentialPeaks_H3K27Ac_peak_1196	95	.	3.17688	11.6917	9.59507	103
chr1	37057399	37057572	PotentialPeaks_H3K27Ac_peak_1197	95	.	3.17688	11.6917	9.59507	56
chr1	37085678	37086071	PotentialPeaks_H3K27Ac_peak_1198	289	.	5.20468	31.3114	28.9122	258
chr1	37086160	37086762	PotentialPeaks_H3K27Ac_peak_1199	112	.	3.37966	13.3529	11.2127	320
chr1	37138089	37138361	PotentialPeaks_H3K27Ac_peak_1200	90	.	3.10929	11.1557	9.07465	147
chr1	37139264	37139414	PotentialPeaks_H3K27Ac_peak_1201	40	.	2.36576	5.90982	4.05058	86
chr1	37178777	37179485	PotentialPeaks_H3K27Ac_peak_1202	79	.	2.77549	9.98805	7.94699	276
chr1	37180157	37180353	PotentialPeaks_H3K27Ac_peak_1203	45	.	2.34366	6.43984	4.55136	53
chr1	37180418	37180582	PotentialPeaks_H3K27Ac_peak_1204	144	.	3.52127	16.6815	14.4716	43
chr1	37207126	37207372	PotentialPeaks_H3K27Ac_peak_1205	57	.	2.63614	7.67112	5.71846	131
chr1	37276495	37277011	PotentialPeaks_H3K27Ac_peak_1206	95	.	3.17688	11.6917	9.59507	265
chr1	37305025	37305175	PotentialPeaks_H3K27Ac_peak_1207	25	.	2.09539	4.33687	2.59236	26
chr1	37356703	37357524	PotentialPeaks_H3K27Ac_peak_1208	3543	.	17.8479	357.605	354.38	241
chr1	37371195	37371345	PotentialPeaks_H3K27Ac_peak_1209	29	.	2.16298	4.71138	2.93583	31
chr1	37381548	37381704	PotentialPeaks_H3K27Ac_peak_1210	40	.	2.36576	5.90982	4.05058	109
chr1	37455126	37455327	PotentialPeaks_H3K27Ac_peak_1211	49	.	2.33868	6.91248	4.99899	94
chr1	37455444	37455864	PotentialPeaks_H3K27Ac_peak_1212	240	.	4.25554	26.4457	24.0956	235
chr1	37456345	37456721	PotentialPeaks_H3K27Ac_peak_1213	192	.	3.85159	21.5085	19.2198	231
chr1	37461759	37461910	PotentialPeaks_H3K27Ac_peak_1214	40	.	2.36576	5.90982	4.05058	112
chr1	37462387	37462592	PotentialPeaks_H3K27Ac_peak_1215	36	.	2.29817	5.49817	3.66539	126
chr1	37486218	37487628	PotentialPeaks_H3K27Ac_peak_1216	6295	.	18.9896	633.166	629.538	955
chr1	37568630	37569718	PotentialPeaks_H3K27Ac_peak_1217	140	.	3.71763	16.2889	14.0854	967
chr1	37569794	37570225	PotentialPeaks_H3K27Ac_peak_1218	74	.	2.8774	9.46469	7.44206	262
chr1	37597199	37597858	PotentialPeaks_H3K27Ac_peak_1219	808	.	7.73112	83.5169	80.8388	538
chr1	37598030	37598539	PotentialPeaks_H3K27Ac_peak_1220	1181	.	9.73618	120.951	118.163	156
chr1	37666906	37667138	PotentialPeaks_H3K27Ac_peak_1221	40	.	2.32466	5.85607	4.00818	43
chr1	37670690	37670850	PotentialPeaks_H3K27Ac_peak_1222	67	.	2.45201	8.72624	6.72962	105
chr1	37671196	37671575	PotentialPeaks_H3K27Ac_peak_1223	69	.	2.45887	8.90453	6.90261	77
chr1	37672492	37673238	PotentialPeaks_H3K27Ac_peak_1224	70	.	2.53279	9.07435	7.06738	638
chr1	37673683	37674039	PotentialPeaks_H3K27Ac_peak_1225	50	.	2.2859	6.9892	5.07292	117
chr1	37751436	37751631	PotentialPeaks_H3K27Ac_peak_1226	95	.	3.17688	11.6917	9.59507	100
chr1	37755656	37755825	PotentialPeaks_H3K27Ac_peak_1227	40	.	2.36576	5.90982	4.05058	72
chr1	37776293	37776633	PotentialPeaks_H3K27Ac_peak_1228	238	.	4.73153	26.1966	23.849	197
chr1	37776689	37777056	PotentialPeaks_H3K27Ac_peak_1229	177	.	4.12319	20.0658	17.798	195
chr1	37799624	37800105	PotentialPeaks_H3K27Ac_peak_1230	85	.	3.0417	10.6288	8.56398	388
chr1	37921242	37922634	PotentialPeaks_H3K27Ac_peak_1231	5878	.	17.0953	591.438	587.868	308
chr1	37928426	37929765	PotentialPeaks_H3K27Ac_peak_1232	667	.	7.06685	69.3875	66.7631	1013
chr1	37946554	37947262	PotentialPeaks_H3K27Ac_peak_1233	760	.	8.53488	78.7605	76.0995	559
chr1	37947328	37947655	PotentialPeaks_H3K27Ac_peak_1234	1212	.	11.3382	124.022	121.226	187
chr1	38053587	38054105	PotentialPeaks_H3K27Ac_peak_1235	6102	.	12.4863	613.879	610.277	290
chr1	38054328	38054855	PotentialPeaks_H3K27Ac_peak_1236	1529	.	5.58123	155.815	152.944	349
chr1	38054954	38055574	PotentialPeaks_H3K27Ac_peak_1237	3040	.	8.15543	307.185	304.04	324
chr1	38086947	38087101	PotentialPeaks_H3K27Ac_peak_1238	57	.	2.63614	7.67112	5.71846	45
chr1	38185702	38186587	PotentialPeaks_H3K27Ac_peak_1239	11033	.	16.3228	1107.61	1103.35	672
chr1	38186688	38187359	PotentialPeaks_H3K27Ac_peak_1240	760	.	3.66776	78.7204	76.0595	185
chr1	38216061	38216316	PotentialPeaks_H3K27Ac_peak_1241	32	.	2.18912	5.03519	3.24432	69
chr1	38216392	38216618	PotentialPeaks_H3K27Ac_peak_1242	54	.	2.55071	7.42709	5.4887	80
chr1	38217253	38217492	PotentialPeaks_H3K27Ac_peak_1243	37	.	2.2738	5.63069	3.79233	148
chr1	38218354	38218640	PotentialPeaks_H3K27Ac_peak_1244	27	.	2.0863	4.49635	2.74389	46
chr1	38231079	38231279	PotentialPeaks_H3K27Ac_peak_1245	40	.	2.36576	5.90982	4.05058	124
chr1	38241990	38242463	PotentialPeaks_H3K27Ac_peak_1246	134	.	3.38412	15.6381	13.4488	343
chr1	38242884	38243253	PotentialPeaks_H3K27Ac_peak_1247	219	.	4.18798	24.2279	21.9035	192
chr1	38249692	38250202	PotentialPeaks_H3K27Ac_peak_1248	304	.	4.07574	32.8933	30.48	187
chr1	38250320	38250834	PotentialPeaks_H3K27Ac_peak_1249	205	.	3.2821	22.8192	20.5127	385
chr1	38251041	38251201	PotentialPeaks_H3K27Ac_peak_1250	50	.	2.02155	7.00657	5.08964	41
chr1	38255489	38256572	PotentialPeaks_H3K27Ac_peak_1251	126	.	2.51935	14.8134	12.6407	432
chr1	38256628	38257496	PotentialPeaks_H3K27Ac_peak_1252	394	.	4.02663	41.9641	39.4819	277
chr1	38266944	38267287	PotentialPeaks_H3K27Ac_peak_1253	152	.	3.53762	17.4968	15.2724	211
chr1	38275006	38275350	PotentialPeaks_H3K27Ac_peak_1254	165	.	3.30025	18.848	16.5995	101
chr1	38278326	38278972	PotentialPeaks_H3K27Ac_peak_1255	356	.	4.88222	38.0635	35.6091	497
chr1	38279444	38279890	PotentialPeaks_H3K27Ac_peak_1256	109	.	2.93457	13.0545	10.9227	313
chr1	38287330	38287520	PotentialPeaks_H3K27Ac_peak_1257	44	.	2.43336	6.33322	4.44884	119
chr1	38294261	38294429	PotentialPeaks_H3K27Ac_peak_1258	54	.	2.27089	7.37124	5.43482	99
chr1	38294875	38295127	PotentialPeaks_H3K27Ac_peak_1259	63	.	2.36483	8.31557	6.33654	127
chr1	38303921	38304240	PotentialPeaks_H3K27Ac_peak_1260	1288	.	3.32615	131.699	128.884	141
chr1	38304299	38305805	PotentialPeaks_H3K27Ac_peak_1261	436	.	3.96146	46.1237	43.6148	126
chr1	38319593	38319873	PotentialPeaks_H3K27Ac_peak_1262	177	.	3.30749	19.9963	17.7304	145
chr1	38320432	38320820	PotentialPeaks_H3K27Ac_peak_1263	68	.	2.25123	8.8494	6.84912	277
chr1	38324595	38325854	PotentialPeaks_H3K27Ac_peak_1264	281	.	3.88156	30.5642	28.1719	663
chr1	38335713	38335921	PotentialPeaks_H3K27Ac_peak_1265	48	.	2.47304	6.78296	4.87413	104
chr1	38336012	38336227	PotentialPeaks_H3K27Ac_peak_1266	51	.	2.51105	7.09772	5.17748	119
chr1	38342391	38342577	PotentialPeaks_H3K27Ac_peak_1267	51	.	2.47929	7.0896	5.16964	84
chr1	38347849	38348022	PotentialPeaks_H3K27Ac_peak_1268	36	.	2.17383	5.50453	3.6715	118
chr1	38364750	38365021	PotentialPeaks_H3K27Ac_peak_1269	27	.	2.10109	4.45904	2.70844	76
chr1	38365250	38365402	PotentialPeaks_H3K27Ac_peak_1270	40	.	2.33601	5.90623	4.05058	77
chr1	38385797	38385954	PotentialPeaks_H3K27Ac_peak_1271	44	.	2.43336	6.33322	4.44884	28
chr1	38386011	38386165	PotentialPeaks_H3K27Ac_peak_1272	44	.	2.43336	6.33322	4.44884	68
chr1	38397286	38397830	PotentialPeaks_H3K27Ac_peak_1273	212	.	4.32521	23.5672	21.2511	165
chr1	38407390	38407693	PotentialPeaks_H3K27Ac_peak_1274	80	.	2.9741	10.1113	8.06329	181
chr1	38416076	38416244	PotentialPeaks_H3K27Ac_peak_1275	90	.	3.0708	11.1647	9.08341	112
chr1	38425089	38425632	PotentialPeaks_H3K27Ac_peak_1276	81	.	2.75932	10.2342	8.18294	203
chr1	38425818	38426182	PotentialPeaks_H3K27Ac_peak_1277	68	.	2.62195	8.83543	6.83556	143
chr1	38433461	38433634	PotentialPeaks_H3K27Ac_peak_1278	75	.	2.90651	9.60334	7.57276	82
chr1	38440802	38441513	PotentialPeaks_H3K27Ac_peak_1279	465	.	4.98421	49.0455	46.5194	312
chr1	38441872	38442039	PotentialPeaks_H3K27Ac_peak_1280	38	.	1.95171	5.7416	3.89854	40
chr1	38447691	38447869	PotentialPeaks_H3K27Ac_peak_1281	47	.	2.02628	6.68395	4.78619	108
chr1	38450396	38450753	PotentialPeaks_H3K27Ac_peak_1282	55	.	2.08809	7.51048	5.56926	121
chr1	38450966	38451861	PotentialPeaks_H3K27Ac_peak_1283	189	.	3.1365	21.2404	18.9561	742
chr1	38452376	38452762	PotentialPeaks_H3K27Ac_peak_1284	122	.	2.69673	14.3672	12.2048	150
chr1	38457590	38458142	PotentialPeaks_H3K27Ac_peak_1285	58	.	2.30734	7.83191	5.87392	84
chr1	38459137	38459495	PotentialPeaks_H3K27Ac_peak_1286	59	.	2.33262	7.86633	5.90718	125
chr1	38467297	38467503	PotentialPeaks_H3K27Ac_peak_1287	64	.	2.42944	8.45458	6.47121	93
chr1	38467825	38468485	PotentialPeaks_H3K27Ac_peak_1288	183	.	3.50366	20.5989	18.3239	224
chr1	38474671	38474872	PotentialPeaks_H3K27Ac_peak_1289	60	.	2.46654	7.99189	6.02865	80
chr1	38474991	38475185	PotentialPeaks_H3K27Ac_peak_1290	81	.	2.7311	10.2384	8.18704	72
chr1	38475571	38475755	PotentialPeaks_H3K27Ac_peak_1291	60	.	2.43997	7.98036	6.01751	80
chr1	38482848	38483215	PotentialPeaks_H3K27Ac_peak_1292	56	.	2.3763	7.62168	5.67667	240
chr1	38483518	38483830	PotentialPeaks_H3K27Ac_peak_1293	61	.	2.44955	8.1696	6.1952	214
chr1	38484291	38484442	PotentialPeaks_H3K27Ac_peak_1294	46	.	2.25298	6.57448	4.68087	89
chr1	38494664	38494852	PotentialPeaks_H3K27Ac_peak_1295	106	.	2.0039	12.743	10.6202	86
chr1	38495174	38496055	PotentialPeaks_H3K27Ac_peak_1296	398	.	3.0421	42.3403	39.8554	146
chr1	38496183	38496688	PotentialPeaks_H3K27Ac_peak_1297	221	.	2.43485	24.5104	22.1829	279
chr1	38496949	38497622	PotentialPeaks_H3K27Ac_peak_1298	648	.	3.66795	67.509	64.8926	353
chr1	38503403	38503622	PotentialPeaks_H3K27Ac_peak_1299	51	.	1.88165	7.12104	5.19999	141
chr1	38505955	38506182	PotentialPeaks_H3K27Ac_peak_1300	84	.	2.33077	10.5475	8.48811	130
chr1	38506804	38507547	PotentialPeaks_H3K27Ac_peak_1301	110	.	2.57267	13.1501	11.0163	296
chr1	38513604	38513992	PotentialPeaks_H3K27Ac_peak_1302	104	.	2.95055	12.6011	10.4814	294
chr1	38514546	38514704	PotentialPeaks_H3K27Ac_peak_1303	60	.	2.42762	8.04424	6.07931	87
chr1	38517602	38517931	PotentialPeaks_H3K27Ac_peak_1304	52	.	2.32853	7.22785	5.29635	199
chr1	38524213	38524518	PotentialPeaks_H3K27Ac_peak_1305	93	.	2.90301	11.4009	9.31399	60
chr1	38524645	38524972	PotentialPeaks_H3K27Ac_peak_1306	67	.	2.61098	8.77651	6.77838	44
chr1	38531169	38531340	PotentialPeaks_H3K27Ac_peak_1307	40	.	2.09559	5.91102	4.05176	115
chr1	38531867	38533366	PotentialPeaks_H3K27Ac_peak_1308	198	.	3.67537	22.1051	19.8081	355
chr1	38545600	38546236	PotentialPeaks_H3K27Ac_peak_1309	100	.	3.0074	12.1854	10.0774	409
chr1	38558371	38558702	PotentialPeaks_H3K27Ac_peak_1310	65	.	2.37572	8.51162	6.52646	233
chr1	38559544	38559694	PotentialPeaks_H3K27Ac_peak_1311	68	.	2.42945	8.85414	6.8537	41
chr1	38560315	38560672	PotentialPeaks_H3K27Ac_peak_1312	170	.	3.39089	19.3027	17.0477	243
chr1	38568126	38568684	PotentialPeaks_H3K27Ac_peak_1313	259	.	3.33244	28.3592	25.9886	436
chr1	38568894	38569860	PotentialPeaks_H3K27Ac_peak_1314	576	.	4.81176	60.2689	57.6849	280
chr1	38586074	38586228	PotentialPeaks_H3K27Ac_peak_1315	52	.	2.56854	7.21414	5.28312	89
chr1	38593447	38594155	PotentialPeaks_H3K27Ac_peak_1316	105	.	2.9384	12.7105	10.5883	270
chr1	38594435	38594775	PotentialPeaks_H3K27Ac_peak_1317	157	.	3.43386	18.0063	15.7727	149
chr1	38595322	38595516	PotentialPeaks_H3K27Ac_peak_1318	105	.	2.9054	12.6839	10.5624	87
chr1	38601008	38601242	PotentialPeaks_H3K27Ac_peak_1319	68	.	2.18099	8.84737	6.84715	101
chr1	38601773	38601998	PotentialPeaks_H3K27Ac_peak_1320	116	.	2.57785	13.7856	11.6367	122
chr1	38602295	38602493	PotentialPeaks_H3K27Ac_peak_1321	67	.	2.1708	8.76432	6.76656	68
chr1	38602755	38603928	PotentialPeaks_H3K27Ac_peak_1322	458	.	4.44873	48.3919	45.8694	275
chr1	38609559	38609835	PotentialPeaks_H3K27Ac_peak_1323	60	.	2.61301	8.02433	6.06003	143
chr1	38610748	38610945	PotentialPeaks_H3K27Ac_peak_1324	58	.	2.60447	7.83089	5.87292	129
chr1	38619093	38619456	PotentialPeaks_H3K27Ac_peak_1325	121	.	2.28892	14.2941	12.1332	100
chr1	38619576	38619839	PotentialPeaks_H3K27Ac_peak_1326	116	.	2.25721	13.7923	11.6433	95
chr1	38621788	38622604	PotentialPeaks_H3K27Ac_peak_1327	608	.	4.22302	63.4599	60.8612	624
chr1	38622737	38623145	PotentialPeaks_H3K27Ac_peak_1328	222	.	2.78644	24.5606	22.2325	85
chr1	38623297	38623455	PotentialPeaks_H3K27Ac_peak_1329	131	.	2.34229	15.3124	13.1289	72
chr1	38635354	38635530	PotentialPeaks_H3K27Ac_peak_1330	62	.	2.63086	8.26558	6.28812	128
chr1	38635898	38636075	PotentialPeaks_H3K27Ac_peak_1331	33	.	2.19188	5.15598	3.34846	143
chr1	38644195	38644390	PotentialPeaks_H3K27Ac_peak_1332	34	.	2.10418	5.26735	3.45491	92
chr1	38644616	38644862	PotentialPeaks_H3K27Ac_peak_1333	75	.	2.70174	9.58421	7.55818	59
chr1	38647413	38647605	PotentialPeaks_H3K27Ac_peak_1334	35	.	2.06564	5.36097	3.54436	123
chr1	38647954	38648362	PotentialPeaks_H3K27Ac_peak_1335	61	.	2.41413	8.09867	6.13194	258
chr1	38651758	38651938	PotentialPeaks_H3K27Ac_peak_1336	43	.	2.27196	6.20908	4.3378	76
chr1	38663062	38663277	PotentialPeaks_H3K27Ac_peak_1337	56	.	2.47538	7.62526	5.68012	85
chr1	38663482	38663999	PotentialPeaks_H3K27Ac_peak_1338	164	.	3.73667	18.7	16.4548	383
chr1	38664123	38664320	PotentialPeaks_H3K27Ac_peak_1339	66	.	2.64362	8.64027	6.64628	102
chr1	38683379	38684331	PotentialPeaks_H3K27Ac_peak_1340	3176	.	7.96834	320.857	317.69	482
chr1	38684465	38685097	PotentialPeaks_H3K27Ac_peak_1341	5148	.	10.5703	518.272	514.808	179
chr1	38699195	38699371	PotentialPeaks_H3K27Ac_peak_1342	44	.	2.43336	6.33322	4.44884	97
chr1	38707648	38707953	PotentialPeaks_H3K27Ac_peak_1343	35	.	2.27745	5.41061	3.59172	242
chr1	38709379	38709613	PotentialPeaks_H3K27Ac_peak_1344	52	.	2.56854	7.21414	5.28312	95
chr1	38728195	38728608	PotentialPeaks_H3K27Ac_peak_1345	66	.	2.77132	8.61684	6.62356	108
chr1	38744943	38745093	PotentialPeaks_H3K27Ac_peak_1346	22	.	2.0278	3.97542	2.26388	65
chr1	38746815	38747034	PotentialPeaks_H3K27Ac_peak_1347	40	.	2.36576	5.90982	4.05058	59
chr1	38750182	38750332	PotentialPeaks_H3K27Ac_peak_1348	33	.	2.13957	5.13307	3.32659	134
chr1	38752789	38753625	PotentialPeaks_H3K27Ac_peak_1349	83	.	2.95031	10.3692	8.31445	691
chr1	38773356	38773525	PotentialPeaks_H3K27Ac_peak_1350	61	.	2.59735	8.09922	6.13247	47
chr1	38778842	38779068	PotentialPeaks_H3K27Ac_peak_1351	57	.	2.63614	7.67112	5.71846	82
chr1	38787136	38787342	PotentialPeaks_H3K27Ac_peak_1352	32	.	2.23058	5.09859	3.29362	83
chr1	38787719	38788003	PotentialPeaks_H3K27Ac_peak_1353	55	.	2.59926	7.50311	5.56215	134
chr1	38809795	38810143	PotentialPeaks_H3K27Ac_peak_1354	75	.	2.90651	9.60334	7.57276	200
chr1	38815047	38815214	PotentialPeaks_H3K27Ac_peak_1355	40	.	2.36576	5.90982	4.05058	62
chr1	38823509	38824690	PotentialPeaks_H3K27Ac_peak_1356	414	.	4.87992	43.9035	41.4085	648
chr1	38830567	38831197	PotentialPeaks_H3K27Ac_peak_1357	172	.	3.91584	19.4792	17.2206	422
chr1	38831723	38831924	PotentialPeaks_H3K27Ac_peak_1358	69	.	2.73487	8.94193	6.93893	101
chr1	38846217	38846854	PotentialPeaks_H3K27Ac_peak_1359	528	.	4.50426	55.3676	52.8074	317
chr1	38847089	38848282	PotentialPeaks_H3K27Ac_peak_1360	383	.	3.82408	40.8267	38.3522	220
chr1	38852483	38852633	PotentialPeaks_H3K27Ac_peak_1361	33	.	1.77576	5.1404	3.3336	63
chr1	38852732	38853616	PotentialPeaks_H3K27Ac_peak_1362	482	.	4.66267	50.8177	48.2814	625
chr1	38853884	38854791	PotentialPeaks_H3K27Ac_peak_1363	117	.	2.64107	13.8896	11.7386	128
chr1	38873020	38873194	PotentialPeaks_H3K27Ac_peak_1364	85	.	3.0417	10.6288	8.56398	91
chr1	38873514	38874164	PotentialPeaks_H3K27Ac_peak_1365	80	.	2.9741	10.1113	8.06329	298
chr1	38874514	38874692	PotentialPeaks_H3K27Ac_peak_1366	40	.	2.36576	5.90982	4.05058	145
chr1	38892457	38893794	PotentialPeaks_H3K27Ac_peak_1367	3156	.	12.4773	318.842	315.678	824
chr1	38903882	38904128	PotentialPeaks_H3K27Ac_peak_1368	73	.	2.21627	9.35419	7.33475	102
chr1	38904278	38905276	PotentialPeaks_H3K27Ac_peak_1369	917	.	6.3263	94.4273	91.7132	502
chr1	38905588	38905877	PotentialPeaks_H3K27Ac_peak_1370	134	.	2.6802	15.6488	13.4594	99
chr1	38906038	38906385	PotentialPeaks_H3K27Ac_peak_1371	177	.	2.98686	19.9939	17.728	226
chr1	38917387	38917792	PotentialPeaks_H3K27Ac_peak_1372	70	.	2.83892	9.10511	7.09274	259
chr1	38918065	38918441	PotentialPeaks_H3K27Ac_peak_1373	197	.	4.32597	22.0502	19.7539	243
chr1	38933420	38933722	PotentialPeaks_H3K27Ac_peak_1374	36	.	2.29817	5.49817	3.66539	261
chr1	38934150	38934332	PotentialPeaks_H3K27Ac_peak_1375	52	.	2.56854	7.21414	5.28312	109
chr1	38949376	38949549	PotentialPeaks_H3K27Ac_peak_1376	47	.	2.31142	6.64773	4.75133	90
chr1	38950651	38951035	PotentialPeaks_H3K27Ac_peak_1377	44	.	1.93503	6.34939	4.46442	75
chr1	38954252	38955218	PotentialPeaks_H3K27Ac_peak_1378	2625	.	12.0747	265.613	262.536	589
chr1	38967026	38967193	PotentialPeaks_H3K27Ac_peak_1379	58	.	2.62118	7.75682	5.80127	94
chr1	38967888	38968480	PotentialPeaks_H3K27Ac_peak_1380	111	.	3.3256	13.3004	11.1635	399
chr1	38968827	38969576	PotentialPeaks_H3K27Ac_peak_1381	132	.	3.60621	15.4582	13.2721	490
chr1	39035745	39036010	PotentialPeaks_H3K27Ac_peak_1382	57	.	2.63614	7.67112	5.71846	137
chr1	39043829	39044472	PotentialPeaks_H3K27Ac_peak_1383	958	.	5.05549	98.5427	95.8161	438
chr1	39044537	39045382	PotentialPeaks_H3K27Ac_peak_1384	7278	.	16.6141	731.665	727.9	239
chr1	39058411	39058562	PotentialPeaks_H3K27Ac_peak_1385	57	.	2.63614	7.67112	5.71846	90
chr1	39063824	39064372	PotentialPeaks_H3K27Ac_peak_1386	501	.	6.29325	52.7297	50.1832	239
chr1	39064521	39064999	PotentialPeaks_H3K27Ac_peak_1387	212	.	4.13138	23.5789	21.2627	147
chr1	39081069	39082229	PotentialPeaks_H3K27Ac_peak_1388	122	.	3.36195	14.3853	12.2226	222
chr1	39082355	39082708	PotentialPeaks_H3K27Ac_peak_1389	71	.	2.75069	9.18709	7.17235	120
chr1	39162475	39162639	PotentialPeaks_H3K27Ac_peak_1390	22	.	2.0278	3.97542	2.26388	135
chr1	39179029	39179238	PotentialPeaks_H3K27Ac_peak_1391	43	.	2.31572	6.18267	4.31249	82
chr1	39179314	39179590	PotentialPeaks_H3K27Ac_peak_1392	70	.	2.70237	9.10302	7.09274	144
chr1	39179738	39180431	PotentialPeaks_H3K27Ac_peak_1393	416	.	5.77508	44.1225	41.626	391
chr1	39180694	39180977	PotentialPeaks_H3K27Ac_peak_1394	55	.	2.47147	7.46696	5.52724	108
chr1	39243277	39243478	PotentialPeaks_H3K27Ac_peak_1395	16	.	1.89261	3.29314	1.65376	167
chr1	39250083	39251317	PotentialPeaks_H3K27Ac_peak_1396	412	.	5.7776	43.7356	41.2416	866
chr1	39253942	39254111	PotentialPeaks_H3K27Ac_peak_1397	66	.	2.61224	8.63086	6.63713	111
chr1	39262290	39262741	PotentialPeaks_H3K27Ac_peak_1398	197	.	4.32597	22.0502	19.7539	244
chr1	39262982	39263297	PotentialPeaks_H3K27Ac_peak_1399	111	.	3.35935	13.2504	11.1145	177
chr1	39263418	39263820	PotentialPeaks_H3K27Ac_peak_1400	97	.	3.1736	11.8828	9.78174	287
chr1	39294235	39294783	PotentialPeaks_H3K27Ac_peak_1401	57	.	2.63614	7.67112	5.71846	225
chr1	39294859	39295299	PotentialPeaks_H3K27Ac_peak_1402	36	.	2.29817	5.49817	3.66539	28
chr1	39324036	39324319	PotentialPeaks_H3K27Ac_peak_1403	44	.	2.43336	6.33322	4.44884	250
chr1	39324670	39324983	PotentialPeaks_H3K27Ac_peak_1404	57	.	2.63614	7.67112	5.71846	123
chr1	39369644	39369797	PotentialPeaks_H3K27Ac_peak_1405	36	.	2.29817	5.49817	3.66539	73
chr1	39370255	39370528	PotentialPeaks_H3K27Ac_peak_1406	29	.	2.16298	4.71138	2.93583	134
chr1	39418715	39418909	PotentialPeaks_H3K27Ac_peak_1407	40	.	2.36576	5.90982	4.05058	112
chr1	39424063	39424505	PotentialPeaks_H3K27Ac_peak_1408	357	.	2.82112	38.2314	35.7758	352
chr1	39424735	39425761	PotentialPeaks_H3K27Ac_peak_1409	13421	.	20.0637	1346.73	1342.18	149
chr1	39500030	39500248	PotentialPeaks_H3K27Ac_peak_1410	68	.	2.7769	8.81207	6.81288	138
chr1	39500456	39500750	PotentialPeaks_H3K27Ac_peak_1411	30	.	2.17535	4.86904	3.08606	139
chr1	39507004	39507161	PotentialPeaks_H3K27Ac_peak_1412	52	.	2.56348	7.19143	5.26782	105
chr1	39510705	39510895	PotentialPeaks_H3K27Ac_peak_1413	70	.	2.7848	9.01955	7.01422	91
chr1	39511791	39511983	PotentialPeaks_H3K27Ac_peak_1414	48	.	2.50095	6.76809	4.85978	113
chr1	39534761	39535654	PotentialPeaks_H3K27Ac_peak_1415	3218	.	14.3934	325.059	321.885	686
chr1	39535762	39535981	PotentialPeaks_H3K27Ac_peak_1416	111	.	2.62673	13.3074	11.1704	128
chr1	39571910	39572113	PotentialPeaks_H3K27Ac_peak_1417	44	.	2.43336	6.33322	4.44884	142
chr1	39572519	39573178	PotentialPeaks_H3K27Ac_peak_1418	165	.	3.988	18.7776	16.5301	196
chr1	39592235	39592389	PotentialPeaks_H3K27Ac_peak_1419	63	.	1.87889	8.33439	6.35476	94
chr1	39592545	39593335	PotentialPeaks_H3K27Ac_peak_1420	11089	.	22.7898	1113.26	1109	241
chr1	39612219	39613835	PotentialPeaks_H3K27Ac_peak_1421	328	.	4.69753	35.2971	32.8639	360
chr1	39620601	39620877	PotentialPeaks_H3K27Ac_peak_1422	52	.	2.49325	7.15584	5.23354	75
chr1	39624097	39624347	PotentialPeaks_H3K27Ac_peak_1423	110	.	3.07393	13.1575	11.0236	112
chr1	39633322	39634291	PotentialPeaks_H3K27Ac_peak_1424	11610	.	18.3236	1165.4	1161.07	720
chr1	39634426	39634617	PotentialPeaks_H3K27Ac_peak_1425	200	.	2.33399	22.3659	20.0657	63
chr1	39675563	39675728	PotentialPeaks_H3K27Ac_peak_1426	36	.	2.29817	5.49817	3.66539	69
chr1	39675799	39676028	PotentialPeaks_H3K27Ac_peak_1427	40	.	2.36576	5.90982	4.05058	140
chr1	39693257	39693516	PotentialPeaks_H3K27Ac_peak_1428	40	.	2.36576	5.90982	4.05058	201
chr1	39702803	39703361	PotentialPeaks_H3K27Ac_peak_1429	151	.	3.31235	17.4045	15.1815	110
chr1	39707081	39707811	PotentialPeaks_H3K27Ac_peak_1430	631	.	6.55809	65.8069	63.1979	420
chr1	39707906	39708101	PotentialPeaks_H3K27Ac_peak_1431	125	.	3.16617	14.7335	12.5624	81
chr1	39719727	39719877	PotentialPeaks_H3K27Ac_peak_1432	44	.	2.43336	6.33322	4.44884	96
chr1	39720343	39720655	PotentialPeaks_H3K27Ac_peak_1433	66	.	2.77132	8.61684	6.62356	166
chr1	39729269	39729638	PotentialPeaks_H3K27Ac_peak_1434	32	.	2.23058	5.09859	3.29362	82
chr1	39736334	39736537	PotentialPeaks_H3K27Ac_peak_1435	32	.	2.23058	5.09859	3.29362	145
chr1	39742295	39742536	PotentialPeaks_H3K27Ac_peak_1436	36	.	2.29817	5.49817	3.66539	47
chr1	39743269	39743675	PotentialPeaks_H3K27Ac_peak_1437	44	.	2.43336	6.33322	4.44884	136
chr1	39758003	39758355	PotentialPeaks_H3K27Ac_peak_1438	155	.	3.75751	17.7893	15.559	178
chr1	39771615	39771870	PotentialPeaks_H3K27Ac_peak_1439	50	.	2.37486	6.97443	5.05866	145
chr1	39772216	39772376	PotentialPeaks_H3K27Ac_peak_1440	26	.	2.00661	4.42765	2.67863	21
chr1	39777556	39778111	PotentialPeaks_H3K27Ac_peak_1441	304	.	5.33987	32.824	30.4114	287
chr1	39787467	39787643	PotentialPeaks_H3K27Ac_peak_1442	61	.	2.4664	8.12841	6.1607	77
chr1	39787938	39788557	PotentialPeaks_H3K27Ac_peak_1443	256	.	3.83335	28.0039	25.6371	310
chr1	39792364	39793824	PotentialPeaks_H3K27Ac_peak_1444	380	.	4.37643	40.4839	38.012	1012
chr1	39798092	39798410	PotentialPeaks_H3K27Ac_peak_1445	170	.	3.79173	19.2876	17.0327	182
chr1	39803472	39803789	PotentialPeaks_H3K27Ac_peak_1446	39	.	2.25031	5.75632	3.91265	57
chr1	39806055	39807298	PotentialPeaks_H3K27Ac_peak_1447	128	.	3.39058	14.9961	12.8201	786
chr1	39816405	39816563	PotentialPeaks_H3K27Ac_peak_1448	103	.	2.89284	12.4233	10.3074	73
chr1	39818085	39818925	PotentialPeaks_H3K27Ac_peak_1449	246	.	4.08109	26.964	24.608	550
chr1	39819121	39819667	PotentialPeaks_H3K27Ac_peak_1450	112	.	2.95697	13.3856	11.2447	310
chr1	39828891	39829782	PotentialPeaks_H3K27Ac_peak_1451	289	.	4.47174	31.3443	28.9449	667
chr1	39830149	39830299	PotentialPeaks_H3K27Ac_peak_1452	25	.	1.93219	4.33061	2.59236	50
chr1	39830372	39830781	PotentialPeaks_H3K27Ac_peak_1453	188	.	3.7133	21.108	18.8253	222
chr1	39831355	39831745	PotentialPeaks_H3K27Ac_peak_1454	109	.	3.00603	13.1329	10.9995	121
chr1	39862203	39862456	PotentialPeaks_H3K27Ac_peak_1455	61	.	2.70373	8.13877	6.16537	43
chr1	39869484	39869744	PotentialPeaks_H3K27Ac_peak_1456	61	.	2.70373	8.13877	6.16537	147
chr1	39895124	39895724	PotentialPeaks_H3K27Ac_peak_1457	393	.	4.24414	41.8364	39.355	120
chr1	39896105	39896721	PotentialPeaks_H3K27Ac_peak_1458	464	.	4.5845	48.9716	46.4459	295
chr1	39924102	39924293	PotentialPeaks_H3K27Ac_peak_1459	42	.	2.18479	6.09619	4.22948	62
chr1	39924870	39925756	PotentialPeaks_H3K27Ac_peak_1460	160	.	3.50763	18.2601	16.0215	516
chr1	39925966	39926635	PotentialPeaks_H3K27Ac_peak_1461	150	.	3.43112	17.2976	15.0763	319
chr1	39934213	39934458	PotentialPeaks_H3K27Ac_peak_1462	44	.	2.43336	6.33322	4.44884	134
chr1	39941931	39942164	PotentialPeaks_H3K27Ac_peak_1463	44	.	2.43336	6.33322	4.44884	51
chr1	39956995	39957696	PotentialPeaks_H3K27Ac_peak_1464	5282	.	6.75114	531.771	528.287	402
chr1	39957766	39959232	PotentialPeaks_H3K27Ac_peak_1465	11577	.	10.6647	1162.03	1157.71	331
chr1	39963891	39964190	PotentialPeaks_H3K27Ac_peak_1466	71	.	2.05455	9.19497	7.18004	213
chr1	39970098	39970321	PotentialPeaks_H3K27Ac_peak_1467	63	.	2.68598	8.37744	6.39643	103
chr1	39979769	39979992	PotentialPeaks_H3K27Ac_peak_1468	58	.	2.39017	7.82934	5.87143	86
chr1	39980152	39980838	PotentialPeaks_H3K27Ac_peak_1469	204	.	3.83486	22.7238	20.4193	383
chr1	39987933	39988260	PotentialPeaks_H3K27Ac_peak_1470	41	.	2.03561	6.02362	4.15987	243
chr1	39992506	39992816	PotentialPeaks_H3K27Ac_peak_1471	89	.	2.43491	11.0229	8.94818	206
chr1	39993081	39993433	PotentialPeaks_H3K27Ac_peak_1472	223	.	3.43356	24.6754	22.3461	141
chr1	39999393	40000101	PotentialPeaks_H3K27Ac_peak_1473	224	.	3.01011	24.7891	22.4578	284
chr1	40004127	40004591	PotentialPeaks_H3K27Ac_peak_1474	83	.	2.1079	10.4039	8.34823	124
chr1	40005014	40005486	PotentialPeaks_H3K27Ac_peak_1475	312	.	3.47564	33.6971	31.277	315
chr1	40013281	40013440	PotentialPeaks_H3K27Ac_peak_1476	74	.	2.5217	9.43665	7.41484	91
chr1	40020550	40020762	PotentialPeaks_H3K27Ac_peak_1477	79	.	2.71074	9.95825	7.91797	140
chr1	40020886	40021195	PotentialPeaks_H3K27Ac_peak_1478	65	.	2.53505	8.51047	6.52536	168
chr1	40025927	40026337	PotentialPeaks_H3K27Ac_peak_1479	75	.	2.62521	9.62107	7.58997	98
chr1	40026516	40026696	PotentialPeaks_H3K27Ac_peak_1480	59	.	2.4472	7.88564	5.92587	48
chr1	40026757	40027289	PotentialPeaks_H3K27Ac_peak_1481	163	.	3.5957	18.586	16.3424	226
chr1	40033345	40034212	PotentialPeaks_H3K27Ac_peak_1482	143	.	2.93289	16.5316	14.3241	654
chr1	40034773	40035254	PotentialPeaks_H3K27Ac_peak_1483	256	.	3.66678	28.0509	25.6837	149
chr1	40049690	40049889	PotentialPeaks_H3K27Ac_peak_1484	42	.	2.3228	6.09352	4.22695	111
chr1	40050044	40050405	PotentialPeaks_H3K27Ac_peak_1485	55	.	2.5028	7.48401	5.54371	72
chr1	40057436	40057607	PotentialPeaks_H3K27Ac_peak_1486	54	.	2.54582	7.4041	5.46652	50
chr1	40058191	40058351	PotentialPeaks_H3K27Ac_peak_1487	44	.	2.39389	6.29107	4.41652	40
chr1	40081552	40081769	PotentialPeaks_H3K27Ac_peak_1488	37	.	2.27164	5.62109	3.78311	97
chr1	40090296	40090867	PotentialPeaks_H3K27Ac_peak_1489	57	.	2.63614	7.67112	5.71846	205
chr1	40114135	40114285	PotentialPeaks_H3K27Ac_peak_1490	36	.	2.29131	5.46922	3.64777	63
chr1	40119749	40119922	PotentialPeaks_H3K27Ac_peak_1491	66	.	2.64362	8.64027	6.64628	135
chr1	40120238	40120462	PotentialPeaks_H3K27Ac_peak_1492	59	.	2.55095	7.86745	5.90823	90
chr1	40323373	40323706	PotentialPeaks_H3K27Ac_peak_1493	95	.	3.17688	11.6917	9.59507	185
chr1	40415465	40415783	PotentialPeaks_H3K27Ac_peak_1494	85	.	3.0417	10.6288	8.56398	80
chr1	40603848	40604243	PotentialPeaks_H3K27Ac_peak_1495	110	.	3.04623	13.187	11.0525	288
chr1	40604306	40604898	PotentialPeaks_H3K27Ac_peak_1496	244	.	4.26433	26.8042	24.4504	275
chr1	40605055	40605408	PotentialPeaks_H3K27Ac_peak_1497	215	.	4.09453	23.9178	21.5977	139
chr1	40698541	40698768	PotentialPeaks_H3K27Ac_peak_1498	48	.	2.50095	6.76809	4.85978	129
chr1	40737998	40738354	PotentialPeaks_H3K27Ac_peak_1499	106	.	3.31207	12.7905	10.6643	184
chr1	40738449	40738957	PotentialPeaks_H3K27Ac_peak_1500	123	.	3.51485	14.503	12.3362	101
chr1	40826302	40826644	PotentialPeaks_H3K27Ac_peak_1501	117	.	3.44726	13.9238	11.7701	204
chr1	40846241	40846421	PotentialPeaks_H3K27Ac_peak_1502	29	.	2.1268	4.66618	2.90526	89
chr1	40846520	40846844	PotentialPeaks_H3K27Ac_peak_1503	111	.	3.32234	13.2835	11.147	194
chr1	40847038	40847997	PotentialPeaks_H3K27Ac_peak_1504	526	.	7.00804	55.1806	52.6215	377
chr1	40881667	40882226	PotentialPeaks_H3K27Ac_peak_1505	57	.	2.63614	7.67112	5.71846	133
chr1	40936210	40936733	PotentialPeaks_H3K27Ac_peak_1506	301	.	4.83713	32.5902	30.1798	243
chr1	40937185	40937558	PotentialPeaks_H3K27Ac_peak_1507	72	.	2.7084	9.29661	7.27874	102
chr1	40947117	40947485	PotentialPeaks_H3K27Ac_peak_1508	85	.	3.0417	10.6288	8.56398	114
chr1	40999959	41000201	PotentialPeaks_H3K27Ac_peak_1509	52	.	2.56854	7.21414	5.28312	131
chr1	41000914	41001081	PotentialPeaks_H3K27Ac_peak_1510	25	.	2.09539	4.33687	2.59236	99
chr1	41001562	41001760	PotentialPeaks_H3K27Ac_peak_1511	48	.	2.50095	6.76809	4.85978	117
chr1	41025082	41025232	PotentialPeaks_H3K27Ac_peak_1512	48	.	2.50095	6.76809	4.85978	64
chr1	41043834	41044019	PotentialPeaks_H3K27Ac_peak_1513	32	.	2.23058	5.09859	3.29362	130
chr1	41044448	41044598	PotentialPeaks_H3K27Ac_peak_1514	48	.	2.50095	6.76809	4.85978	83
chr1	41084364	41084550	PotentialPeaks_H3K27Ac_peak_1515	90	.	3.10929	11.1557	9.07465	75
chr1	41190358	41190688	PotentialPeaks_H3K27Ac_peak_1516	88	.	3.06887	10.9576	8.88451	189
chr1	41196292	41197001	PotentialPeaks_H3K27Ac_peak_1517	90	.	2.80438	11.1744	9.09285	519
chr1	41197164	41197413	PotentialPeaks_H3K27Ac_peak_1518	116	.	3.05174	13.8065	11.6572	112
chr1	41197661	41198218	PotentialPeaks_H3K27Ac_peak_1519	68	.	2.49798	8.86657	6.86576	133
chr1	41202787	41202940	PotentialPeaks_H3K27Ac_peak_1520	59	.	2.48273	7.94155	5.97992	80
chr1	41209624	41210256	PotentialPeaks_H3K27Ac_peak_1521	281	.	3.16511	30.5283	28.1368	112
chr1	41210954	41211448	PotentialPeaks_H3K27Ac_peak_1522	201	.	2.69496	22.4747	20.1732	277
chr1	41213411	41213744	PotentialPeaks_H3K27Ac_peak_1523	169	.	2.54261	19.2151	16.9613	209
chr1	41213932	41214252	PotentialPeaks_H3K27Ac_peak_1524	208	.	2.74291	23.1297	20.8195	174
chr1	41214320	41214768	PotentialPeaks_H3K27Ac_peak_1525	233	.	2.87759	25.6521	23.3108	304
chr1	41215177	41215331	PotentialPeaks_H3K27Ac_peak_1526	34	.	1.72588	5.22006	3.40971	52
chr1	41223004	41223272	PotentialPeaks_H3K27Ac_peak_1527	61	.	2.70373	8.13877	6.16537	128
chr1	41225269	41225458	PotentialPeaks_H3K27Ac_peak_1528	32	.	2.23058	5.09859	3.29362	91
chr1	41243897	41244172	PotentialPeaks_H3K27Ac_peak_1529	110	.	3.30612	13.1995	11.0647	132
chr1	41244577	41244762	PotentialPeaks_H3K27Ac_peak_1530	79	.	2.91148	9.99178	7.95059	70
chr1	41244842	41245117	PotentialPeaks_H3K27Ac_peak_1531	73	.	2.81931	9.35962	7.33996	179
chr1	41245238	41245453	PotentialPeaks_H3K27Ac_peak_1532	40	.	2.31495	5.93517	4.07493	170
chr1	41245832	41246018	PotentialPeaks_H3K27Ac_peak_1533	63	.	2.64793	8.35008	6.36997	129
chr1	41247099	41247249	PotentialPeaks_H3K27Ac_peak_1534	59	.	2.53113	7.91227	5.95166	99
chr1	41297438	41297616	PotentialPeaks_H3K27Ac_peak_1535	46	.	1.9161	6.59287	4.69855	111
chr1	41299345	41300125	PotentialPeaks_H3K27Ac_peak_1536	341	.	3.7101	36.5736	34.1306	469
chr1	41300186	41300380	PotentialPeaks_H3K27Ac_peak_1537	148	.	2.68131	17.0819	14.8641	106
chr1	41300594	41301361	PotentialPeaks_H3K27Ac_peak_1538	254	.	3.30583	27.8384	25.4733	237
chr1	41301523	41301788	PotentialPeaks_H3K27Ac_peak_1539	71	.	2.15573	9.15778	7.14391	89
chr1	41309917	41310074	PotentialPeaks_H3K27Ac_peak_1540	36	.	2.29817	5.49817	3.66539	82
chr1	41321015	41321171	PotentialPeaks_H3K27Ac_peak_1541	126	.	3.21907	14.8562	12.6828	80
chr1	41321356	41321747	PotentialPeaks_H3K27Ac_peak_1542	96	.	2.86638	11.7231	9.62572	271
chr1	41321844	41322230	PotentialPeaks_H3K27Ac_peak_1543	56	.	2.36924	7.58169	5.63805	250
chr1	41322302	41322489	PotentialPeaks_H3K27Ac_peak_1544	81	.	2.64592	10.2092	8.1586	126
chr1	41327974	41328235	PotentialPeaks_H3K27Ac_peak_1545	54	.	2.04389	7.35881	5.42284	51
chr1	41328537	41328861	PotentialPeaks_H3K27Ac_peak_1546	148	.	2.78049	17.0966	14.8785	180
chr1	41331742	41332033	PotentialPeaks_H3K27Ac_peak_1547	265	.	3.56032	28.9721	26.5957	150
chr1	41332159	41332635	PotentialPeaks_H3K27Ac_peak_1548	311	.	3.83861	33.6075	31.1881	137
chr1	41411603	41411864	PotentialPeaks_H3K27Ac_peak_1549	72	.	2.71075	9.30908	7.29087	135
chr1	41411943	41412461	PotentialPeaks_H3K27Ac_peak_1550	136	.	3.46301	15.8702	13.6754	245
chr1	41415887	41416100	PotentialPeaks_H3K27Ac_peak_1551	56	.	2.44066	7.58022	5.63665	121
chr1	41417344	41417651	PotentialPeaks_H3K27Ac_peak_1552	66	.	2.77132	8.61684	6.62356	125
chr1	41418711	41418871	PotentialPeaks_H3K27Ac_peak_1553	44	.	2.43336	6.33322	4.44884	115
chr1	41436318	41436781	PotentialPeaks_H3K27Ac_peak_1554	65	.	2.31693	8.49762	6.5129	273
chr1	41436940	41437185	PotentialPeaks_H3K27Ac_peak_1555	92	.	2.5448	11.3201	9.2351	119
chr1	41437353	41437727	PotentialPeaks_H3K27Ac_peak_1556	56	.	2.16181	7.54456	5.60218	226
chr1	41445598	41446989	PotentialPeaks_H3K27Ac_peak_1557	757	.	3.32981	78.3729	75.7133	891
chr1	41447445	41447595	PotentialPeaks_H3K27Ac_peak_1558	62	.	1.59964	8.2073	6.23168	84
chr1	41447681	41448338	PotentialPeaks_H3K27Ac_peak_1559	2260	.	5.5763	229.076	226.062	504
chr1	41448479	41448681	PotentialPeaks_H3K27Ac_peak_1560	112	.	1.81156	13.3624	11.222	76
chr1	41468035	41468239	PotentialPeaks_H3K27Ac_peak_1561	44	.	2.43336	6.33322	4.44884	83
chr1	41468539	41468848	PotentialPeaks_H3K27Ac_peak_1562	44	.	2.43336	6.33322	4.44884	136
chr1	41483661	41483824	PotentialPeaks_H3K27Ac_peak_1563	59	.	2.65259	7.9027	5.94236	97
chr1	41484754	41484916	PotentialPeaks_H3K27Ac_peak_1564	27	.	2.09628	4.53825	2.7837	25
chr1	41488285	41488556	PotentialPeaks_H3K27Ac_peak_1565	80	.	2.8999	10.1157	8.06755	189
chr1	41494843	41494993	PotentialPeaks_H3K27Ac_peak_1566	32	.	2.23058	5.09859	3.29362	29
chr1	41495785	41496178	PotentialPeaks_H3K27Ac_peak_1567	111	.	3.36275	13.2676	11.1314	130
chr1	41496254	41496449	PotentialPeaks_H3K27Ac_peak_1568	75	.	2.90651	9.60334	7.57276	120
chr1	41496710	41496877	PotentialPeaks_H3K27Ac_peak_1569	44	.	2.43336	6.33322	4.44884	141
chr1	41583467	41583654	PotentialPeaks_H3K27Ac_peak_1570	52	.	2.56854	7.21414	5.28312	128
chr1	41611122	41611277	PotentialPeaks_H3K27Ac_peak_1571	54	.	2.54582	7.4041	5.46652	109
chr1	41611451	41612182	PotentialPeaks_H3K27Ac_peak_1572	98	.	3.06942	11.9473	9.84477	654
chr1	41612534	41613218	PotentialPeaks_H3K27Ac_peak_1573	204	.	4.04377	22.7404	20.4349	433
chr1	41616261	41616425	PotentialPeaks_H3K27Ac_peak_1574	36	.	2.1519	5.50323	3.67028	31
chr1	41616970	41617298	PotentialPeaks_H3K27Ac_peak_1575	72	.	2.79237	9.22693	7.21106	230
chr1	41625272	41625422	PotentialPeaks_H3K27Ac_peak_1576	29	.	2.16298	4.71138	2.93583	111
chr1	41661673	41662220	PotentialPeaks_H3K27Ac_peak_1577	286	.	3.53296	31.0752	28.6786	149
chr1	41662316	41663396	PotentialPeaks_H3K27Ac_peak_1578	509	.	4.41035	53.5253	50.9746	708
chr1	41667320	41667624	PotentialPeaks_H3K27Ac_peak_1579	65	.	2.1727	8.56932	6.58237	209
chr1	41668244	41668542	PotentialPeaks_H3K27Ac_peak_1580	56	.	2.21044	7.55394	5.61125	95
chr1	41708314	41709758	PotentialPeaks_H3K27Ac_peak_1581	163	.	3.80033	18.5524	16.3094	880
chr1	41709939	41710202	PotentialPeaks_H3K27Ac_peak_1582	101	.	3.12608	12.2514	10.1393	120
chr1	41763744	41763894	PotentialPeaks_H3K27Ac_peak_1583	57	.	2.63614	7.67112	5.71846	77
chr1	41798624	41798831	PotentialPeaks_H3K27Ac_peak_1584	83	.	2.22054	10.3814	8.32633	65
chr1	41799296	41800008	PotentialPeaks_H3K27Ac_peak_1585	504	.	4.41376	52.9494	50.4018	569
chr1	41800110	41800754	PotentialPeaks_H3K27Ac_peak_1586	740	.	5.27979	76.724	74.0705	447
chr1	41801095	41801608	PotentialPeaks_H3K27Ac_peak_1587	77	.	2.15558	9.77533	7.74002	137
chr1	41805977	41806128	PotentialPeaks_H3K27Ac_peak_1588	34	.	2.05523	5.30588	3.49173	16
chr1	41808476	41808629	PotentialPeaks_H3K27Ac_peak_1589	32	.	2.18067	4.99906	3.20993	137
chr1	41826195	41826357	PotentialPeaks_H3K27Ac_peak_1590	66	.	2.77132	8.61684	6.62356	92
chr1	41830383	41830548	PotentialPeaks_H3K27Ac_peak_1591	48	.	2.50095	6.76809	4.85978	114
chr1	41858255	41858407	PotentialPeaks_H3K27Ac_peak_1592	57	.	2.63614	7.67112	5.71846	67
chr1	41867484	41868554	PotentialPeaks_H3K27Ac_peak_1593	392	.	4.18485	41.7778	39.2968	247
chr1	41868714	41869061	PotentialPeaks_H3K27Ac_peak_1594	360	.	4.03926	38.4628	36.0053	216
chr1	41888215	41888447	PotentialPeaks_H3K27Ac_peak_1595	40	.	2.36576	5.90982	4.05058	117
chr1	41944556	41944922	PotentialPeaks_H3K27Ac_peak_1596	74	.	2.42748	9.50566	7.48187	291
chr1	41944989	41945300	PotentialPeaks_H3K27Ac_peak_1597	78	.	2.46945	9.93064	7.89111	101
chr1	41945810	41945994	PotentialPeaks_H3K27Ac_peak_1598	74	.	2.41066	9.52072	7.49652	92
chr1	41946176	41946326	PotentialPeaks_H3K27Ac_peak_1599	41	.	2.04042	6.05382	4.18882	88
chr1	41946944	41947241	PotentialPeaks_H3K27Ac_peak_1600	41	.	2.03801	6.0387	4.17428	75
chr1	41947633	41948327	PotentialPeaks_H3K27Ac_peak_1601	145	.	3.03035	16.7588	14.5475	344
chr1	41954900	41955140	PotentialPeaks_H3K27Ac_peak_1602	44	.	2.43336	6.33322	4.44884	116
chr1	41961454	41961703	PotentialPeaks_H3K27Ac_peak_1603	40	.	2.36576	5.90982	4.05058	120
chr1	41965486	41965639	PotentialPeaks_H3K27Ac_peak_1604	40	.	2.36576	5.90982	4.05058	69
chr1	42115046	42115359	PotentialPeaks_H3K27Ac_peak_1605	80	.	2.9741	10.1113	8.06329	97
chr1	42116238	42116507	PotentialPeaks_H3K27Ac_peak_1606	129	.	3.58244	15.0903	12.9108	128
chr1	42151569	42151777	PotentialPeaks_H3K27Ac_peak_1607	61	.	2.70373	8.13877	6.16537	107
chr1	42154968	42155161	PotentialPeaks_H3K27Ac_peak_1608	51	.	2.4287	7.11606	5.19519	127
chr1	42163244	42163628	PotentialPeaks_H3K27Ac_peak_1609	384	.	3.82861	40.8844	38.4095	239
chr1	42163759	42164262	PotentialPeaks_H3K27Ac_peak_1610	1088	.	6.45899	111.606	108.842	240
chr1	42164682	42165017	PotentialPeaks_H3K27Ac_peak_1611	256	.	3.26721	28.0432	25.6761	51
chr1	42165167	42166109	PotentialPeaks_H3K27Ac_peak_1612	325	.	3.58116	35.0055	32.5749	457
chr1	42209126	42209337	PotentialPeaks_H3K27Ac_peak_1613	112	.	3.37966	13.3529	11.2127	147
chr1	42209474	42209642	PotentialPeaks_H3K27Ac_peak_1614	101	.	3.24448	12.2367	10.125	100
chr1	42210461	42210635	PotentialPeaks_H3K27Ac_peak_1615	40	.	2.36576	5.90982	4.05058	99
chr1	42287663	42287817	PotentialPeaks_H3K27Ac_peak_1616	76	.	2.66593	9.70193	7.66866	113
chr1	42290188	42290521	PotentialPeaks_H3K27Ac_peak_1617	178	.	3.57291	20.1393	17.8705	228
chr1	42293119	42293383	PotentialPeaks_H3K27Ac_peak_1618	42	.	2.16328	6.0863	4.21999	203
chr1	42298891	42300851	PotentialPeaks_H3K27Ac_peak_1619	466	.	4.17103	49.1994	46.6722	1465
chr1	42300993	42301488	PotentialPeaks_H3K27Ac_peak_1620	241	.	3.16685	26.4526	24.1024	133
chr1	42314860	42315605	PotentialPeaks_H3K27Ac_peak_1621	174	.	3.19377	19.7002	17.4385	247
chr1	42316028	42316202	PotentialPeaks_H3K27Ac_peak_1622	107	.	2.67076	12.8858	10.7576	84
chr1	42316255	42316551	PotentialPeaks_H3K27Ac_peak_1623	102	.	2.62274	12.359	10.2446	89
chr1	42316906	42317358	PotentialPeaks_H3K27Ac_peak_1624	421	.	4.73692	44.6238	42.1243	149
chr1	42334063	42334271	PotentialPeaks_H3K27Ac_peak_1625	101	.	3.24448	12.2367	10.125	82
chr1	42352084	42352329	PotentialPeaks_H3K27Ac_peak_1626	57	.	2.63614	7.67112	5.71846	106
chr1	42352801	42352961	PotentialPeaks_H3K27Ac_peak_1627	32	.	2.23058	5.09859	3.29362	83
chr1	42408886	42409152	PotentialPeaks_H3K27Ac_peak_1628	45	.	2.24523	6.4184	4.53081	191
chr1	42409257	42409515	PotentialPeaks_H3K27Ac_peak_1629	94	.	2.85927	11.5032	9.41383	125
chr1	42409649	42409924	PotentialPeaks_H3K27Ac_peak_1630	101	.	2.95756	12.2715	10.159	149
chr1	42410532	42410778	PotentialPeaks_H3K27Ac_peak_1631	71	.	2.62333	9.14986	7.13619	124
chr1	42426103	42426293	PotentialPeaks_H3K27Ac_peak_1632	79	.	2.8124	10.016	7.97417	78
chr1	42444796	42445076	PotentialPeaks_H3K27Ac_peak_1633	75	.	2.90651	9.60334	7.57276	173
chr1	42450734	42450887	PotentialPeaks_H3K27Ac_peak_1634	32	.	2.23058	5.09859	3.29362	131
chr1	42455852	42456059	PotentialPeaks_H3K27Ac_peak_1635	48	.	2.50095	6.76809	4.85978	112
chr1	42472410	42473268	PotentialPeaks_H3K27Ac_peak_1636	389	.	5.0849	41.3948	38.9166	473
chr1	42473577	42473742	PotentialPeaks_H3K27Ac_peak_1637	73	.	2.57433	9.32097	7.30242	51
chr1	42473818	42474045	PotentialPeaks_H3K27Ac_peak_1638	90	.	2.77649	11.1748	9.0933	130
chr1	42474294	42474600	PotentialPeaks_H3K27Ac_peak_1639	92	.	2.81006	11.3805	9.29406	102
chr1	42474691	42474900	PotentialPeaks_H3K27Ac_peak_1640	76	.	2.63926	9.70351	7.67016	93
chr1	42522702	42523012	PotentialPeaks_H3K27Ac_peak_1641	44	.	2.43336	6.33322	4.44884	49
chr1	42528699	42529735	PotentialPeaks_H3K27Ac_peak_1642	422	.	4.51755	44.7284	42.2282	203
chr1	42530076	42530779	PotentialPeaks_H3K27Ac_peak_1643	420	.	4.56195	44.544	42.0449	123
chr1	42547604	42549021	PotentialPeaks_H3K27Ac_peak_1644	2711	.	9.21181	274.264	271.173	1129
chr1	42561818	42562206	PotentialPeaks_H3K27Ac_peak_1645	36	.	2.29817	5.49817	3.66539	243
chr1	42581617	42581816	PotentialPeaks_H3K27Ac_peak_1646	66	.	2.77132	8.61684	6.62356	85
chr1	42585168	42585364	PotentialPeaks_H3K27Ac_peak_1647	62	.	2.68406	8.20823	6.23257	64
chr1	42595431	42595693	PotentialPeaks_H3K27Ac_peak_1648	49	.	2.03419	6.83102	4.92048	128
chr1	42595889	42597687	PotentialPeaks_H3K27Ac_peak_1649	333	.	3.96729	35.7524	33.3158	966
chr1	42597856	42598090	PotentialPeaks_H3K27Ac_peak_1650	59	.	2.1396	7.89909	5.9389	39
chr1	42598166	42598353	PotentialPeaks_H3K27Ac_peak_1651	97	.	2.48895	11.8714	9.77056	85
chr1	42663101	42663252	PotentialPeaks_H3K27Ac_peak_1652	44	.	2.43336	6.33322	4.44884	81
chr1	42684850	42685783	PotentialPeaks_H3K27Ac_peak_1653	763	.	4.71636	79.0036	76.3417	648
chr1	42686312	42687296	PotentialPeaks_H3K27Ac_peak_1654	997	.	5.39434	102.531	99.7925	247
chr1	42693735	42694244	PotentialPeaks_H3K27Ac_peak_1655	49	.	2.36888	6.8164	4.90634	184
chr1	42724505	42725002	PotentialPeaks_H3K27Ac_peak_1656	80	.	2.9741	10.1113	8.06329	369
chr1	42730084	42730290	PotentialPeaks_H3K27Ac_peak_1657	84	.	3.0082	10.4662	8.40887	58
chr1	42730490	42730641	PotentialPeaks_H3K27Ac_peak_1658	65	.	2.74633	8.50036	6.51556	89
chr1	42730882	42731032	PotentialPeaks_H3K27Ac_peak_1659	42	.	2.38972	6.14245	4.27391	27
chr1	42741256	42741644	PotentialPeaks_H3K27Ac_peak_1660	911	.	3.46003	93.827	91.1148	221
chr1	42742735	42744302	PotentialPeaks_H3K27Ac_peak_1661	3024	.	5.32615	305.566	302.424	991
chr1	42749556	42749868	PotentialPeaks_H3K27Ac_peak_1662	614	.	2.09385	64.0893	61.4878	194
chr1	42750280	42750492	PotentialPeaks_H3K27Ac_peak_1663	166	.	1.52095	18.8742	16.6253	130
chr1	42750750	42751070	PotentialPeaks_H3K27Ac_peak_1664	532	.	1.94586	55.8224	53.26	248
chr1	42751228	42752172	PotentialPeaks_H3K27Ac_peak_1665	1628	.	2.75026	165.782	162.89	667
chr1	42752734	42752914	PotentialPeaks_H3K27Ac_peak_1666	229	.	1.60387	25.3221	22.985	74
chr1	42753415	42753777	PotentialPeaks_H3K27Ac_peak_1667	2088	.	3.09187	211.81	208.828	187
chr1	42754188	42755691	PotentialPeaks_H3K27Ac_peak_1668	1360	.	2.67034	138.871	136.039	162
chr1	42760198	42760368	PotentialPeaks_H3K27Ac_peak_1669	36	.	1.45331	5.49534	3.66539	7
chr1	42760447	42761333	PotentialPeaks_H3K27Ac_peak_1670	1258	.	4.50944	128.633	125.825	413
chr1	42761759	42762401	PotentialPeaks_H3K27Ac_peak_1671	260	.	2.57242	28.3799	26.009	125
chr1	42769847	42771437	PotentialPeaks_H3K27Ac_peak_1672	3065	.	7.5134	309.68	306.53	663
chr1	42798350	42798562	PotentialPeaks_H3K27Ac_peak_1673	49	.	2.38305	6.88758	4.97494	77
chr1	42798613	42799528	PotentialPeaks_H3K27Ac_peak_1674	95	.	2.98617	11.685	9.59124	375
chr1	42800360	42800510	PotentialPeaks_H3K27Ac_peak_1675	48	.	2.36487	6.7962	4.88685	91
chr1	42800896	42801134	PotentialPeaks_H3K27Ac_peak_1676	66	.	2.58503	8.63672	6.64282	88
chr1	42812404	42812728	PotentialPeaks_H3K27Ac_peak_1677	32	.	2.23058	5.09859	3.29362	103
chr1	42820414	42820575	PotentialPeaks_H3K27Ac_peak_1678	57	.	2.63614	7.67112	5.71846	108
chr1	42821278	42821434	PotentialPeaks_H3K27Ac_peak_1679	52	.	2.56854	7.21414	5.28312	53
chr1	42837036	42837428	PotentialPeaks_H3K27Ac_peak_1680	192	.	3.81894	21.5591	19.2698	244
chr1	42838360	42838549	PotentialPeaks_H3K27Ac_peak_1681	46	.	2.30025	6.58994	4.69572	93
chr1	42839143	42839400	PotentialPeaks_H3K27Ac_peak_1682	48	.	2.30002	6.70872	4.80998	194
chr1	42839628	42839778	PotentialPeaks_H3K27Ac_peak_1683	49	.	2.3275	6.85366	4.94228	32
chr1	42840305	42840526	PotentialPeaks_H3K27Ac_peak_1684	58	.	2.46074	7.82322	5.86548	99
chr1	42907665	42907901	PotentialPeaks_H3K27Ac_peak_1685	95	.	2.58321	11.6072	9.51538	127
chr1	42908056	42909008	PotentialPeaks_H3K27Ac_peak_1686	5229	.	21.3717	526.415	522.939	235
chr1	42917709	42917866	PotentialPeaks_H3K27Ac_peak_1687	40	.	2.36576	5.90982	4.05058	128
chr1	42927258	42927609	PotentialPeaks_H3K27Ac_peak_1688	102	.	3.14933	12.3754	10.2606	146
chr1	42932904	42935356	PotentialPeaks_H3K27Ac_peak_1689	790	.	4.66512	81.7382	79.0664	1199
chr1	42944709	42945509	PotentialPeaks_H3K27Ac_peak_1690	242	.	3.02025	26.6313	24.2793	137
chr1	42945800	42947050	PotentialPeaks_H3K27Ac_peak_1691	566	.	4.21861	59.2594	56.6803	436
chr1	42947116	42947368	PotentialPeaks_H3K27Ac_peak_1692	40	.	1.74395	5.89943	4.04968	49
chr1	42962224	42962404	PotentialPeaks_H3K27Ac_peak_1693	119	.	3.43124	14.073	11.9164	89
chr1	42964059	42964247	PotentialPeaks_H3K27Ac_peak_1694	39	.	2.32014	5.83613	3.98908	88
chr1	42981112	42981301	PotentialPeaks_H3K27Ac_peak_1695	52	.	2.56854	7.21414	5.28312	120
chr1	43009499	43010614	PotentialPeaks_H3K27Ac_peak_1696	2640	.	11.0753	267.113	264.034	599
chr1	43063107	43063388	PotentialPeaks_H3K27Ac_peak_1697	112	.	3.37966	13.3529	11.2127	147
chr1	43097907	43098067	PotentialPeaks_H3K27Ac_peak_1698	24	.	1.9724	4.18665	2.46402	51
chr1	43099024	43099321	PotentialPeaks_H3K27Ac_peak_1699	55	.	2.42679	7.50668	5.56559	146
chr1	43102040	43102421	PotentialPeaks_H3K27Ac_peak_1700	103	.	2.90141	12.4774	10.3604	118
chr1	43122670	43122864	PotentialPeaks_H3K27Ac_peak_1701	70	.	2.83892	9.10511	7.09274	87
chr1	43142099	43142303	PotentialPeaks_H3K27Ac_peak_1702	61	.	2.70373	8.13877	6.16537	61
chr1	43148874	43150081	PotentialPeaks_H3K27Ac_peak_1703	4180	.	13.4065	421.414	418.092	685
chr1	43154867	43156161	PotentialPeaks_H3K27Ac_peak_1704	14590	.	17.28	1463.74	1459.07	529
chr1	43193646	43193800	PotentialPeaks_H3K27Ac_peak_1705	48	.	2.50095	6.76809	4.85978	43
chr1	43196305	43196488	PotentialPeaks_H3K27Ac_peak_1706	25	.	2.04646	4.23525	2.51003	130
chr1	43200452	43200716	PotentialPeaks_H3K27Ac_peak_1707	68	.	2.6864	8.85979	6.8592	128
chr1	43200786	43200987	PotentialPeaks_H3K27Ac_peak_1708	46	.	2.35823	6.51015	4.61903	111
chr1	43208839	43209297	PotentialPeaks_H3K27Ac_peak_1709	84	.	2.51666	10.5414	8.48219	315
chr1	43209831	43210643	PotentialPeaks_H3K27Ac_peak_1710	128	.	2.90043	14.9987	12.8227	430
chr1	43211503	43211657	PotentialPeaks_H3K27Ac_peak_1711	59	.	2.24724	7.91095	5.95037	62
chr1	43220148	43221259	PotentialPeaks_H3K27Ac_peak_1712	2780	.	12.6931	281.191	278.088	470
chr1	43227941	43228245	PotentialPeaks_H3K27Ac_peak_1713	145	.	3.48804	16.7205	14.5099	137
chr1	43231041	43231288	PotentialPeaks_H3K27Ac_peak_1714	48	.	2.3917	6.80117	4.89167	148
chr1	43242848	43243284	PotentialPeaks_H3K27Ac_peak_1715	384	.	5.8386	40.8805	38.4056	197
chr1	43243443	43243622	PotentialPeaks_H3K27Ac_peak_1716	34	.	2.21485	5.25641	3.44447	54
chr1	43243720	43244101	PotentialPeaks_H3K27Ac_peak_1717	237	.	4.59569	26.0834	23.7376	168
chr1	43244544	43244730	PotentialPeaks_H3K27Ac_peak_1718	25	.	2.05239	4.25958	2.53312	102
chr1	43259267	43260352	PotentialPeaks_H3K27Ac_peak_1719	123	.	3.47307	14.5231	12.3559	658
chr1	43260432	43261008	PotentialPeaks_H3K27Ac_peak_1720	216	.	4.50153	23.9447	21.6243	189
chr1	43321490	43321858	PotentialPeaks_H3K27Ac_peak_1721	204	.	4.39356	22.7251	20.4198	105
chr1	43350809	43351018	PotentialPeaks_H3K27Ac_peak_1722	48	.	2.50095	6.76809	4.85978	85
chr1	43351174	43351428	PotentialPeaks_H3K27Ac_peak_1723	66	.	2.77132	8.61684	6.62356	168
chr1	43356764	43356948	PotentialPeaks_H3K27Ac_peak_1724	29	.	2.16298	4.71138	2.93583	88
chr1	43373677	43374603	PotentialPeaks_H3K27Ac_peak_1725	216	.	4.45162	23.982	21.6611	742
chr1	43406729	43407316	PotentialPeaks_H3K27Ac_peak_1726	90	.	3.10929	11.1557	9.07465	470
chr1	43407592	43407877	PotentialPeaks_H3K27Ac_peak_1727	95	.	3.17688	11.6917	9.59507	143
chr1	43415296	43415789	PotentialPeaks_H3K27Ac_peak_1728	358	.	3.01181	38.3012	35.8448	112
chr1	43416322	43417506	PotentialPeaks_H3K27Ac_peak_1729	1020	.	4.71339	104.842	102.097	1062
chr1	43417676	43418321	PotentialPeaks_H3K27Ac_peak_1730	1349	.	5.37742	137.733	134.904	380
chr1	43418757	43418952	PotentialPeaks_H3K27Ac_peak_1731	75	.	1.83332	9.5834	7.55739	105
chr1	43423078	43423233	PotentialPeaks_H3K27Ac_peak_1732	48	.	2.09347	6.7752	4.86668	130
chr1	43453252	43453635	PotentialPeaks_H3K27Ac_peak_1733	57	.	2.63614	7.67112	5.71846	106
chr1	43458644	43458849	PotentialPeaks_H3K27Ac_peak_1734	31	.	2.18839	4.92333	3.13779	106
chr1	43459353	43459692	PotentialPeaks_H3K27Ac_peak_1735	61	.	2.70373	8.13877	6.16537	202
chr1	43471192	43471376	PotentialPeaks_H3K27Ac_peak_1736	61	.	2.70373	8.13877	6.16537	85
chr1	43483967	43485100	PotentialPeaks_H3K27Ac_peak_1737	156	.	3.60055	17.8814	15.6497	731
chr1	43485279	43485520	PotentialPeaks_H3K27Ac_peak_1738	24	.	1.97407	4.1941	2.47107	65
chr1	43502237	43503654	PotentialPeaks_H3K27Ac_peak_1739	7410	.	12.566	744.866	741.082	748
chr1	43510388	43510795	PotentialPeaks_H3K27Ac_peak_1740	105	.	3.20901	12.6915	10.5698	269
chr1	43521364	43521533	PotentialPeaks_H3K27Ac_peak_1741	31	.	2.06607	4.88815	3.10429	69
chr1	43525498	43525671	PotentialPeaks_H3K27Ac_peak_1742	42	.	2.18479	6.09619	4.22948	78
chr1	43526037	43526391	PotentialPeaks_H3K27Ac_peak_1743	26	.	1.92431	4.37177	2.62555	29
chr1	43530969	43531146	PotentialPeaks_H3K27Ac_peak_1744	42	.	2.17746	6.16379	4.29434	89
chr1	43531208	43531371	PotentialPeaks_H3K27Ac_peak_1745	51	.	2.3223	7.07085	5.15158	120
chr1	43531587	43532113	PotentialPeaks_H3K27Ac_peak_1746	177	.	3.65954	19.9895	17.7237	196
chr1	43532243	43532408	PotentialPeaks_H3K27Ac_peak_1747	59	.	2.45684	7.93859	5.97706	43
chr1	43542303	43542763	PotentialPeaks_H3K27Ac_peak_1748	101	.	2.92207	12.2419	10.1301	379
chr1	43553306	43553497	PotentialPeaks_H3K27Ac_peak_1749	30	.	2.06582	4.79178	3.01245	76
chr1	43554551	43554888	PotentialPeaks_H3K27Ac_peak_1750	63	.	2.52849	8.33032	6.3508	134
chr1	43561634	43561872	PotentialPeaks_H3K27Ac_peak_1751	109	.	3.09027	13.0556	10.9238	115
chr1	43579518	43579822	PotentialPeaks_H3K27Ac_peak_1752	57	.	2.41689	7.71852	5.76428	235
chr1	43580032	43580240	PotentialPeaks_H3K27Ac_peak_1753	78	.	2.6376	9.84854	7.81128	66
chr1	43580409	43580719	PotentialPeaks_H3K27Ac_peak_1754	145	.	3.30952	16.7275	14.5168	227
chr1	43587458	43587608	PotentialPeaks_H3K27Ac_peak_1755	32	.	2.10572	5.07617	3.28337	29
chr1	43591612	43591765	PotentialPeaks_H3K27Ac_peak_1756	37	.	2.20701	5.55364	3.71857	71
chr1	43611758	43612000	PotentialPeaks_H3K27Ac_peak_1757	42	.	2.27931	6.12769	4.2597	125
chr1	43612175	43613230	PotentialPeaks_H3K27Ac_peak_1758	186	.	3.89174	20.96	18.6792	137
chr1	43647324	43647487	PotentialPeaks_H3K27Ac_peak_1759	40	.	2.36576	5.90982	4.05058	75
chr1	43651548	43651704	PotentialPeaks_H3K27Ac_peak_1760	48	.	2.50095	6.76809	4.85978	102
chr1	43672723	43673157	PotentialPeaks_H3K27Ac_peak_1761	44	.	2.43336	6.33322	4.44884	75
chr1	43751939	43752570	PotentialPeaks_H3K27Ac_peak_1762	125	.	3.12589	14.6798	12.5097	272
chr1	43755145	43755553	PotentialPeaks_H3K27Ac_peak_1763	259	.	4.43656	28.2733	25.904	206
chr1	43755753	43756035	PotentialPeaks_H3K27Ac_peak_1764	195	.	3.90825	21.8756	19.5823	134
chr1	43756250	43756425	PotentialPeaks_H3K27Ac_peak_1765	88	.	2.88385	10.9322	8.85972	80
chr1	43771523	43771675	PotentialPeaks_H3K27Ac_peak_1766	29	.	2.16298	4.71138	2.93583	53
chr1	43787399	43788140	PotentialPeaks_H3K27Ac_peak_1767	128	.	3.52468	15.0308	12.8541	390
chr1	43789098	43789506	PotentialPeaks_H3K27Ac_peak_1768	202	.	4.15274	22.5505	20.248	131
chr1	43789696	43790014	PotentialPeaks_H3K27Ac_peak_1769	48	.	2.35687	6.75597	4.85547	125
chr1	43794644	43794919	PotentialPeaks_H3K27Ac_peak_1770	75	.	2.90651	9.60334	7.57276	141
chr1	43813673	43813823	PotentialPeaks_H3K27Ac_peak_1771	40	.	2.36576	5.90982	4.05058	84
chr1	43838040	43838236	PotentialPeaks_H3K27Ac_peak_1772	61	.	2.70373	8.13877	6.16537	79
chr1	43855340	43855519	PotentialPeaks_H3K27Ac_peak_1773	66	.	2.77132	8.61684	6.62356	110
chr1	43883845	43884649	PotentialPeaks_H3K27Ac_peak_1774	7080	.	18.5006	711.744	708.008	580
chr1	43884914	43885244	PotentialPeaks_H3K27Ac_peak_1775	140	.	2.46514	16.2917	14.0882	186
chr1	43989948	43991468	PotentialPeaks_H3K27Ac_peak_1776	5152	.	13.0505	518.739	515.275	1191
chr1	44099103	44099253	PotentialPeaks_H3K27Ac_peak_1777	57	.	2.63614	7.67112	5.71846	74
chr1	44158527	44158740	PotentialPeaks_H3K27Ac_peak_1778	67	.	2.21096	8.76319	6.76545	70
chr1	44158847	44159677	PotentialPeaks_H3K27Ac_peak_1779	6362	.	22.1207	639.901	636.263	232
chr1	44175212	44175586	PotentialPeaks_H3K27Ac_peak_1780	277	.	2.56559	30.1361	27.7481	298
chr1	44175859	44177284	PotentialPeaks_H3K27Ac_peak_1781	6499	.	12.3261	653.603	649.946	587
chr1	44204098	44205496	PotentialPeaks_H3K27Ac_peak_1782	12216	.	21.2249	1226.02	1221.62	889
chr1	44454703	44454893	PotentialPeaks_H3K27Ac_peak_1783	101	.	3.24448	12.2367	10.125	111
chr1	44608476	44609574	PotentialPeaks_H3K27Ac_peak_1784	2488	.	10.2013	251.866	248.812	559
chr1	44625156	44625398	PotentialPeaks_H3K27Ac_peak_1785	70	.	2.83892	9.10511	7.09274	195
chr1	44641072	44641223	PotentialPeaks_H3K27Ac_peak_1786	47	.	2.47092	6.63497	4.73902	52
chr1	44641636	44642355	PotentialPeaks_H3K27Ac_peak_1787	82	.	2.98119	10.3344	8.2806	361
chr1	44648247	44648469	PotentialPeaks_H3K27Ac_peak_1788	48	.	2.50095	6.76809	4.85978	96
chr1	44731156	44731436	PotentialPeaks_H3K27Ac_peak_1789	44	.	2.43336	6.33322	4.44884	89
chr1	44738710	44739308	PotentialPeaks_H3K27Ac_peak_1790	283	.	4.43573	30.7668	28.3728	462
chr1	44739555	44739735	PotentialPeaks_H3K27Ac_peak_1791	109	.	2.96596	13.0703	10.9382	128
chr1	44739955	44741067	PotentialPeaks_H3K27Ac_peak_1792	289	.	4.47837	31.393	28.9931	196
chr1	44777521	44777971	PotentialPeaks_H3K27Ac_peak_1793	184	.	4.19078	20.7204	18.4428	200
chr1	44778610	44779138	PotentialPeaks_H3K27Ac_peak_1794	140	.	3.71763	16.2889	14.0854	180
chr1	44830410	44830585	PotentialPeaks_H3K27Ac_peak_1795	52	.	2.56854	7.21414	5.28312	131
chr1	45079427	45079713	PotentialPeaks_H3K27Ac_peak_1796	80	.	2.9741	10.1113	8.06329	115
chr1	45368493	45368748	PotentialPeaks_H3K27Ac_peak_1797	48	.	2.50095	6.76809	4.85978	191
chr1	45369142	45369477	PotentialPeaks_H3K27Ac_peak_1798	36	.	2.29817	5.49817	3.66539	79
chr1	45817575	45817777	PotentialPeaks_H3K27Ac_peak_1799	36	.	2.29817	5.49817	3.66539	28
chr1	45818056	45818477	PotentialPeaks_H3K27Ac_peak_1800	90	.	3.10929	11.1557	9.07465	201
chr1	45822804	45822998	PotentialPeaks_H3K27Ac_peak_1801	90	.	3.10929	11.1557	9.07465	87
chr1	45837332	45837787	PotentialPeaks_H3K27Ac_peak_1802	564	.	6.61691	59.0399	56.4617	167
chr1	45838380	45838950	PotentialPeaks_H3K27Ac_peak_1803	504	.	6.38755	52.9489	50.4013	270
chr1	45851714	45852794	PotentialPeaks_H3K27Ac_peak_1804	7168	.	17.403	720.622	716.873	783
chr1	45917014	45917164	PotentialPeaks_H3K27Ac_peak_1805	36	.	2.29817	5.49817	3.66539	139
chr1	45917235	45917454	PotentialPeaks_H3K27Ac_peak_1806	29	.	2.16298	4.71138	2.93583	171
chr1	45921378	45921614	PotentialPeaks_H3K27Ac_peak_1807	61	.	2.70114	8.12688	6.15923	123
chr1	45961321	45961663	PotentialPeaks_H3K27Ac_peak_1808	164	.	3.77112	18.6447	16.4002	122
chr1	45961716	45962003	PotentialPeaks_H3K27Ac_peak_1809	182	.	3.96141	20.5646	18.29	164
chr1	45962171	45963163	PotentialPeaks_H3K27Ac_peak_1810	280	.	4.82683	30.475	28.0841	313
chr1	45963369	45963519	PotentialPeaks_H3K27Ac_peak_1811	44	.	2.32724	6.36038	4.475	56
chr1	45982038	45983219	PotentialPeaks_H3K27Ac_peak_1812	406	.	6.21858	43.1634	40.6731	616
chr1	46123453	46124105	PotentialPeaks_H3K27Ac_peak_1813	3272	.	22.8465	330.399	327.217	386
chr1	46482377	46482535	PotentialPeaks_H3K27Ac_peak_1814	101	.	3.24448	12.2367	10.125	78
chr1	46909491	46910384	PotentialPeaks_H3K27Ac_peak_1815	13772	.	14.7239	1381.79	1377.2	671
chr1	46910772	46911065	PotentialPeaks_H3K27Ac_peak_1816	170	.	1.91969	19.3403	17.0847	151
chr1	46942077	46942443	PotentialPeaks_H3K27Ac_peak_1817	86	.	2.90171	10.6688	8.6029	104
chr1	46943070	46943224	PotentialPeaks_H3K27Ac_peak_1818	54	.	2.47834	7.36294	5.42677	105
chr1	46943596	46943964	PotentialPeaks_H3K27Ac_peak_1819	59	.	2.567	7.94779	5.98598	140
chr1	46944680	46945108	PotentialPeaks_H3K27Ac_peak_1820	228	.	4.33961	25.1771	22.8416	207
chr1	46945177	46945845	PotentialPeaks_H3K27Ac_peak_1821	57	.	2.51279	7.67571	5.72288	114
chr1	47113868	47114210	PotentialPeaks_H3K27Ac_peak_1822	61	.	2.70373	8.13877	6.16537	253
chr1	47220328	47221165	PotentialPeaks_H3K27Ac_peak_1823	177	.	4.12319	20.0658	17.798	315
chr1	47221402	47221854	PotentialPeaks_H3K27Ac_peak_1824	85	.	3.0417	10.6288	8.56398	120
chr1	47225713	47225863	PotentialPeaks_H3K27Ac_peak_1825	44	.	2.43336	6.33322	4.44884	32
chr1	47274159	47274386	PotentialPeaks_H3K27Ac_peak_1826	36	.	2.29817	5.49817	3.66539	127
chr1	47328535	47328890	PotentialPeaks_H3K27Ac_peak_1827	108	.	3.15005	12.9938	10.8633	51
chr1	47329054	47329325	PotentialPeaks_H3K27Ac_peak_1828	114	.	3.15595	13.6428	11.4967	177
chr1	47329390	47329737	PotentialPeaks_H3K27Ac_peak_1829	207	.	4.01354	23.1082	20.7982	199
chr1	47334831	47335460	PotentialPeaks_H3K27Ac_peak_1830	265	.	4.18713	28.9149	26.539	122
chr1	47335606	47335933	PotentialPeaks_H3K27Ac_peak_1831	105	.	2.89695	12.6297	10.5093	86
chr1	47501109	47501286	PotentialPeaks_H3K27Ac_peak_1832	48	.	2.50095	6.76809	4.85978	115
chr1	47601800	47602729	PotentialPeaks_H3K27Ac_peak_1833	184	.	4.19078	20.7204	18.4428	189
chr1	47602819	47603331	PotentialPeaks_H3K27Ac_peak_1834	112	.	3.37966	13.3529	11.2127	277
chr1	47757527	47757680	PotentialPeaks_H3K27Ac_peak_1835	44	.	2.43336	6.33322	4.44884	90
chr1	47762510	47762974	PotentialPeaks_H3K27Ac_peak_1836	106	.	3.31207	12.7905	10.6643	127
chr1	47763208	47763436	PotentialPeaks_H3K27Ac_peak_1837	245	.	4.79912	26.9096	24.5542	105
chr1	49133906	49134064	PotentialPeaks_H3K27Ac_peak_1838	70	.	2.83892	9.10511	7.09274	112
chr1	49714009	49714426	PotentialPeaks_H3K27Ac_peak_1839	90	.	3.10929	11.1557	9.07465	273
chr1	49714806	49714959	PotentialPeaks_H3K27Ac_peak_1840	70	.	2.83892	9.10511	7.09274	66
chr1	50409614	50409770	PotentialPeaks_H3K27Ac_peak_1841	66	.	2.77132	8.61684	6.62356	39
chr1	50410453	50410632	PotentialPeaks_H3K27Ac_peak_1842	152	.	3.85282	17.5183	15.2922	91
chr1	50410905	50411251	PotentialPeaks_H3K27Ac_peak_1843	95	.	3.17688	11.6917	9.59507	60
chr1	50670108	50670285	PotentialPeaks_H3K27Ac_peak_1844	75	.	2.90651	9.60334	7.57276	64
chr1	50670338	50670493	PotentialPeaks_H3K27Ac_peak_1845	40	.	2.36576	5.90982	4.05058	94
chr1	50671561	50671719	PotentialPeaks_H3K27Ac_peak_1846	40	.	2.36576	5.90982	4.05058	35
chr1	50672671	50673047	PotentialPeaks_H3K27Ac_peak_1847	66	.	2.77132	8.61684	6.62356	98
chr1	50679224	50679920	PotentialPeaks_H3K27Ac_peak_1848	146	.	3.78522	16.8998	14.6849	122
chr1	50680025	50680538	PotentialPeaks_H3K27Ac_peak_1849	106	.	3.31207	12.7905	10.6643	124
chr1	50680682	50680836	PotentialPeaks_H3K27Ac_peak_1850	101	.	3.17315	12.2948	10.1818	89
chr1	50685057	50685710	PotentialPeaks_H3K27Ac_peak_1851	82	.	2.87065	10.3243	8.2707	146
chr1	50686373	50686824	PotentialPeaks_H3K27Ac_peak_1852	86	.	3.02331	10.7328	8.66536	314
chr1	50687578	50687732	PotentialPeaks_H3K27Ac_peak_1853	79	.	2.94135	9.95376	7.91359	82
chr1	50689773	50689970	PotentialPeaks_H3K27Ac_peak_1854	38	.	2.32566	5.7373	3.89444	70
chr1	50703693	50704216	PotentialPeaks_H3K27Ac_peak_1855	85	.	3.0417	10.6288	8.56398	115
chr1	50704389	50705022	PotentialPeaks_H3K27Ac_peak_1856	70	.	2.83892	9.10511	7.09274	376
chr1	50708917	50709414	PotentialPeaks_H3K27Ac_peak_1857	85	.	3.0417	10.6288	8.56398	57
chr1	50742291	50742578	PotentialPeaks_H3K27Ac_peak_1858	40	.	2.36576	5.90982	4.05058	115
chr1	50743736	50744000	PotentialPeaks_H3K27Ac_peak_1859	57	.	2.63614	7.67112	5.71846	121
chr1	50801498	50801775	PotentialPeaks_H3K27Ac_peak_1860	129	.	3.58244	15.0903	12.9108	180
chr1	50802693	50802959	PotentialPeaks_H3K27Ac_peak_1861	48	.	2.50095	6.76809	4.85978	167
chr1	50803168	50803318	PotentialPeaks_H3K27Ac_peak_1862	36	.	2.29817	5.49817	3.66539	103
chr1	50876842	50877001	PotentialPeaks_H3K27Ac_peak_1863	44	.	2.43336	6.33322	4.44884	73
chr1	50887211	50887488	PotentialPeaks_H3K27Ac_peak_1864	57	.	2.63614	7.67112	5.71846	208
chr1	50917702	50917852	PotentialPeaks_H3K27Ac_peak_1865	44	.	2.43336	6.33322	4.44884	126
chr1	50954958	50955198	PotentialPeaks_H3K27Ac_peak_1866	197	.	4.32597	22.0502	19.7539	112
chr1	50983174	50984251	PotentialPeaks_H3K27Ac_peak_1867	2861	.	10.3606	289.271	286.155	798
chr1	50984342	50984887	PotentialPeaks_H3K27Ac_peak_1868	654	.	4.61167	68.1111	65.4921	312
chr1	51018468	51018649	PotentialPeaks_H3K27Ac_peak_1869	52	.	2.49794	7.17806	5.255	120
chr1	51019594	51019939	PotentialPeaks_H3K27Ac_peak_1870	91	.	3.05206	11.2665	9.18275	306
chr1	51019997	51020707	PotentialPeaks_H3K27Ac_peak_1871	115	.	3.35457	13.6737	11.527	134
chr1	51029869	51030022	PotentialPeaks_H3K27Ac_peak_1872	19	.	1.9602	3.62739	1.95085	26
chr1	51038446	51038601	PotentialPeaks_H3K27Ac_peak_1873	52	.	2.56854	7.21414	5.28312	104
chr1	51100745	51100902	PotentialPeaks_H3K27Ac_peak_1874	75	.	2.90651	9.60334	7.57276	37
chr1	51101490	51101640	PotentialPeaks_H3K27Ac_peak_1875	52	.	2.56854	7.21414	5.28312	76
chr1	51121536	51121699	PotentialPeaks_H3K27Ac_peak_1876	70	.	2.83892	9.10511	7.09274	62
chr1	51152908	51154607	PotentialPeaks_H3K27Ac_peak_1877	251	.	4.00745	27.5314	25.1698	1551
chr1	51161641	51161871	PotentialPeaks_H3K27Ac_peak_1878	52	.	2.56854	7.21414	5.28312	136
chr1	51171917	51172070	PotentialPeaks_H3K27Ac_peak_1879	36	.	2.29817	5.49817	3.66539	65
chr1	51182461	51182819	PotentialPeaks_H3K27Ac_peak_1880	112	.	3.37966	13.3529	11.2127	122
chr1	51183291	51183483	PotentialPeaks_H3K27Ac_peak_1881	44	.	2.43336	6.33322	4.44884	95
chr1	51202948	51203358	PotentialPeaks_H3K27Ac_peak_1882	45	.	2.30856	6.39094	4.50437	329
chr1	51205359	51205758	PotentialPeaks_H3K27Ac_peak_1883	209	.	3.79907	23.2601	20.9484	140
chr1	51208379	51208653	PotentialPeaks_H3K27Ac_peak_1884	44	.	2.2602	6.38214	4.4959	145
chr1	51208717	51208872	PotentialPeaks_H3K27Ac_peak_1885	69	.	2.58375	8.92873	6.92612	68
chr1	51221161	51221333	PotentialPeaks_H3K27Ac_peak_1886	95	.	3.17688	11.6917	9.59507	73
chr1	51256350	51256524	PotentialPeaks_H3K27Ac_peak_1887	29	.	2.16298	4.71138	2.93583	116
chr1	51273302	51273602	PotentialPeaks_H3K27Ac_peak_1888	44	.	2.43336	6.33322	4.44884	140
chr1	51273666	51273867	PotentialPeaks_H3K27Ac_peak_1889	36	.	2.29817	5.49817	3.66539	163
chr1	51298733	51298921	PotentialPeaks_H3K27Ac_peak_1890	88	.	3.05353	10.8821	8.8109	122
chr1	51307180	51307443	PotentialPeaks_H3K27Ac_peak_1891	36	.	2.29817	5.49817	3.66539	182
chr1	51322032	51322494	PotentialPeaks_H3K27Ac_peak_1892	71	.	2.82334	9.20562	7.19036	109
chr1	51324037	51324393	PotentialPeaks_H3K27Ac_peak_1893	42	.	2.35263	6.10548	4.23838	113
chr1	51346254	51346727	PotentialPeaks_H3K27Ac_peak_1894	117	.	3.44726	13.9238	11.7701	382
chr1	51372130	51372612	PotentialPeaks_H3K27Ac_peak_1895	165	.	3.988	18.7776	16.5301	126
chr1	51381177	51381488	PotentialPeaks_H3K27Ac_peak_1896	36	.	2.29817	5.49817	3.66539	119
chr1	51389851	51390152	PotentialPeaks_H3K27Ac_peak_1897	183	.	3.54261	20.6468	18.3712	182
chr1	51390256	51390826	PotentialPeaks_H3K27Ac_peak_1898	399	.	5.08553	42.4764	39.9907	339
chr1	51391201	51391711	PotentialPeaks_H3K27Ac_peak_1899	262	.	4.14934	28.6271	26.2539	177
chr1	51444464	51444614	PotentialPeaks_H3K27Ac_peak_1900	66	.	2.77132	8.61684	6.62356	98
chr1	51445100	51445257	PotentialPeaks_H3K27Ac_peak_1901	52	.	2.56854	7.21414	5.28312	73
chr1	51453408	51453578	PotentialPeaks_H3K27Ac_peak_1902	75	.	2.90651	9.60334	7.57276	105
chr1	51454438	51454750	PotentialPeaks_H3K27Ac_peak_1903	70	.	2.83892	9.10511	7.09274	19
chr1	51455310	51455497	PotentialPeaks_H3K27Ac_peak_1904	95	.	3.17688	11.6917	9.59507	106
chr1	51481331	51481789	PotentialPeaks_H3K27Ac_peak_1905	66	.	2.77132	8.61684	6.62356	158
chr1	51502603	51502753	PotentialPeaks_H3K27Ac_peak_1906	22	.	2.0278	3.97542	2.26388	24
chr1	51534390	51535263	PotentialPeaks_H3K27Ac_peak_1907	3284	.	13.9078	331.595	328.411	733
chr1	51535445	51536065	PotentialPeaks_H3K27Ac_peak_1908	1815	.	9.59395	184.47	181.54	210
chr1	51564251	51564601	PotentialPeaks_H3K27Ac_peak_1909	186	.	3.45608	20.9412	18.6607	185
chr1	51564747	51564947	PotentialPeaks_H3K27Ac_peak_1910	41	.	2.08268	6.03	4.16596	90
chr1	51565524	51565770	PotentialPeaks_H3K27Ac_peak_1911	126	.	2.96886	14.7738	12.6019	113
chr1	51565844	51566140	PotentialPeaks_H3K27Ac_peak_1912	127	.	2.99408	14.9555	12.7802	118
chr1	51566445	51567134	PotentialPeaks_H3K27Ac_peak_1913	148	.	3.18221	17.1167	14.8983	343
chr1	51586994	51587166	PotentialPeaks_H3K27Ac_peak_1914	32	.	2.23058	5.09859	3.29362	48
chr1	51587242	51587475	PotentialPeaks_H3K27Ac_peak_1915	95	.	3.17688	11.6917	9.59507	103
chr1	51595976	51596231	PotentialPeaks_H3K27Ac_peak_1916	80	.	2.9741	10.1113	8.06329	191
chr1	51637828	51638011	PotentialPeaks_H3K27Ac_peak_1917	66	.	2.77132	8.61684	6.62356	75
chr1	51653561	51653784	PotentialPeaks_H3K27Ac_peak_1918	134	.	3.65004	15.6857	13.4939	123
chr1	51654141	51654429	PotentialPeaks_H3K27Ac_peak_1919	29	.	2.16298	4.71138	2.93583	204
chr1	51664050	51664844	PotentialPeaks_H3K27Ac_peak_1920	111	.	3.27815	13.2707	11.1344	305
chr1	51673754	51675291	PotentialPeaks_H3K27Ac_peak_1921	244	.	3.78003	26.7629	24.4095	1103
chr1	51675420	51675602	PotentialPeaks_H3K27Ac_peak_1922	67	.	2.32885	8.70056	6.70476	75
chr1	51692790	51693345	PotentialPeaks_H3K27Ac_peak_1923	102	.	3.19452	12.4059	10.2905	114
chr1	51693957	51694275	PotentialPeaks_H3K27Ac_peak_1924	81	.	2.91651	10.1995	8.14907	188
chr1	51704903	51705095	PotentialPeaks_H3K27Ac_peak_1925	78	.	2.52501	9.88647	7.84815	105
chr1	51705902	51706173	PotentialPeaks_H3K27Ac_peak_1926	100	.	2.81907	12.1266	10.0199	107
chr1	51706456	51706862	PotentialPeaks_H3K27Ac_peak_1927	388	.	5.074	41.3096	38.8319	289
chr1	51706947	51707760	PotentialPeaks_H3K27Ac_peak_1928	303	.	4.4569	32.8047	30.3926	91
chr1	51708354	51708537	PotentialPeaks_H3K27Ac_peak_1929	69	.	2.47073	8.97828	6.97422	99
chr1	51711945	51712365	PotentialPeaks_H3K27Ac_peak_1930	75	.	2.90651	9.60334	7.57276	348
chr1	51745091	51745318	PotentialPeaks_H3K27Ac_peak_1931	66	.	2.77132	8.61684	6.62356	146
chr1	51746004	51746186	PotentialPeaks_H3K27Ac_peak_1932	36	.	2.29817	5.49817	3.66539	53
chr1	51753342	51754688	PotentialPeaks_H3K27Ac_peak_1933	504	.	5.81855	52.9502	50.4026	969
chr1	51776859	51777011	PotentialPeaks_H3K27Ac_peak_1934	48	.	2.50095	6.76809	4.85978	86
chr1	51803283	51803537	PotentialPeaks_H3K27Ac_peak_1935	48	.	2.50095	6.76809	4.85978	192
chr1	51804386	51804736	PotentialPeaks_H3K27Ac_peak_1936	90	.	3.10929	11.1557	9.07465	135
chr1	51843620	51843773	PotentialPeaks_H3K27Ac_peak_1937	61	.	2.70373	8.13877	6.16537	86
chr1	51852217	51852901	PotentialPeaks_H3K27Ac_peak_1938	205	.	4.0575	22.827	20.5204	505
chr1	51853010	51853184	PotentialPeaks_H3K27Ac_peak_1939	52	.	2.41912	7.20086	5.27695	95
chr1	51854174	51854403	PotentialPeaks_H3K27Ac_peak_1940	74	.	2.7073	9.45279	7.43049	126
chr1	51854877	51855135	PotentialPeaks_H3K27Ac_peak_1941	78	.	2.73418	9.92704	7.8876	114
chr1	51859655	51859920	PotentialPeaks_H3K27Ac_peak_1942	67	.	2.76589	8.75973	6.76209	125
chr1	51861381	51861688	PotentialPeaks_H3K27Ac_peak_1943	36	.	2.29817	5.49817	3.66539	86
chr1	51861995	51862154	PotentialPeaks_H3K27Ac_peak_1944	66	.	2.77132	8.61684	6.62356	87
chr1	51871354	51871924	PotentialPeaks_H3K27Ac_peak_1945	140	.	3.71763	16.2889	14.0854	146
chr1	51872087	51872378	PotentialPeaks_H3K27Ac_peak_1946	57	.	2.63614	7.67112	5.71846	195
chr1	51879243	51879420	PotentialPeaks_H3K27Ac_peak_1947	22	.	2.0278	3.97542	2.26388	57
chr1	51893733	51893888	PotentialPeaks_H3K27Ac_peak_1948	32	.	2.23058	5.09859	3.29362	72
chr1	51894968	51895126	PotentialPeaks_H3K27Ac_peak_1949	29	.	2.16298	4.71138	2.93583	51
chr1	51905469	51905700	PotentialPeaks_H3K27Ac_peak_1950	51	.	2.31702	7.04188	5.12365	139
chr1	51905994	51906983	PotentialPeaks_H3K27Ac_peak_1951	111	.	2.94008	13.2747	11.1384	857
chr1	51911508	51911920	PotentialPeaks_H3K27Ac_peak_1952	57	.	2.41876	7.72886	5.77427	279
chr1	51912015	51912311	PotentialPeaks_H3K27Ac_peak_1953	74	.	2.65122	9.46119	7.43865	128
chr1	51912856	51913330	PotentialPeaks_H3K27Ac_peak_1954	88	.	2.78331	10.878	8.80696	348
chr1	51922237	51922425	PotentialPeaks_H3K27Ac_peak_1955	52	.	2.56854	7.21414	5.28312	43
chr1	51922957	51923228	PotentialPeaks_H3K27Ac_peak_1956	52	.	2.56854	7.21414	5.28312	123
chr1	51923599	51923839	PotentialPeaks_H3K27Ac_peak_1957	75	.	2.90651	9.60334	7.57276	126
chr1	51927145	51927721	PotentialPeaks_H3K27Ac_peak_1958	52	.	2.56854	7.21414	5.28312	462
chr1	51928364	51928601	PotentialPeaks_H3K27Ac_peak_1959	44	.	2.43336	6.33322	4.44884	168
chr1	51929924	51930101	PotentialPeaks_H3K27Ac_peak_1960	85	.	3.0417	10.6288	8.56398	105
chr1	51936108	51936819	PotentialPeaks_H3K27Ac_peak_1961	91	.	2.84967	11.27	9.18616	395
chr1	51936919	51937103	PotentialPeaks_H3K27Ac_peak_1962	56	.	2.4198	7.60213	5.65777	76
chr1	51938649	51938799	PotentialPeaks_H3K27Ac_peak_1963	28	.	2.03166	4.63306	2.87379	33
chr1	51939483	51939638	PotentialPeaks_H3K27Ac_peak_1964	60	.	2.46654	7.99189	6.02865	46
chr1	51944388	51944547	PotentialPeaks_H3K27Ac_peak_1965	55	.	2.40267	7.50926	5.56808	95
chr1	51944669	51945226	PotentialPeaks_H3K27Ac_peak_1966	192	.	3.86092	21.5692	19.2797	226
chr1	51952820	51953256	PotentialPeaks_H3K27Ac_peak_1967	36	.	2.26669	5.48212	3.66006	147
chr1	51953338	51953785	PotentialPeaks_H3K27Ac_peak_1968	57	.	2.63614	7.67112	5.71846	298
chr1	51966273	51966596	PotentialPeaks_H3K27Ac_peak_1969	50	.	2.45636	6.98056	5.06457	102
chr1	51971999	51973028	PotentialPeaks_H3K27Ac_peak_1970	8894	.	16.3803	893.4	889.417	515
chr1	52053518	52053673	PotentialPeaks_H3K27Ac_peak_1971	29	.	2.16298	4.71138	2.93583	102
chr1	52053782	52054130	PotentialPeaks_H3K27Ac_peak_1972	75	.	2.90651	9.60334	7.57276	115
chr1	52135428	52135634	PotentialPeaks_H3K27Ac_peak_1973	61	.	2.70373	8.13877	6.16537	126
chr1	52137587	52137776	PotentialPeaks_H3K27Ac_peak_1974	29	.	2.16298	4.71138	2.93583	107
chr1	52170049	52170687	PotentialPeaks_H3K27Ac_peak_1975	3463	.	18.982	349.524	346.312	364
chr1	52175783	52176844	PotentialPeaks_H3K27Ac_peak_1976	1244	.	10.3646	127.21	124.406	682
chr1	52205609	52205883	PotentialPeaks_H3K27Ac_peak_1977	25	.	2.09539	4.33687	2.59236	44
chr1	52207083	52207335	PotentialPeaks_H3K27Ac_peak_1978	36	.	2.29817	5.49817	3.66539	61
chr1	52207687	52207841	PotentialPeaks_H3K27Ac_peak_1979	57	.	2.63614	7.67112	5.71846	35
chr1	52223692	52223842	PotentialPeaks_H3K27Ac_peak_1980	52	.	2.56854	7.21414	5.28312	59
chr1	52288867	52290090	PotentialPeaks_H3K27Ac_peak_1981	4878	.	10.4882	491.253	487.828	1020
chr1	52290310	52290558	PotentialPeaks_H3K27Ac_peak_1982	507	.	3.26682	53.2802	50.7309	103
chr1	52309979	52310150	PotentialPeaks_H3K27Ac_peak_1983	80	.	2.9741	10.1113	8.06329	118
chr1	52362604	52362754	PotentialPeaks_H3K27Ac_peak_1984	36	.	2.29817	5.49817	3.66539	123
chr1	52513516	52513811	PotentialPeaks_H3K27Ac_peak_1985	85	.	3.0417	10.6288	8.56398	207
chr1	52526942	52527621	PotentialPeaks_H3K27Ac_peak_1986	373	.	5.11833	39.8499	37.3824	436
chr1	52527885	52528669	PotentialPeaks_H3K27Ac_peak_1987	216	.	3.98018	23.9978	21.6768	148
chr1	52528821	52529226	PotentialPeaks_H3K27Ac_peak_1988	110	.	3.07893	13.1873	11.0527	143
chr1	52556587	52557905	PotentialPeaks_H3K27Ac_peak_1989	806	.	7.46524	83.3386	80.6612	1004
chr1	52634788	52634980	PotentialPeaks_H3K27Ac_peak_1990	70	.	2.83892	9.10511	7.09274	99
chr1	52635167	52635866	PotentialPeaks_H3K27Ac_peak_1991	66	.	2.77132	8.61684	6.62356	119
chr1	52653935	52654133	PotentialPeaks_H3K27Ac_peak_1992	85	.	3.0417	10.6288	8.56398	92
chr1	52687427	52688047	PotentialPeaks_H3K27Ac_peak_1993	10446	.	29.8613	1048.87	1044.69	256
chr1	52771157	52771541	PotentialPeaks_H3K27Ac_peak_1994	112	.	3.25468	13.3605	11.2202	291
chr1	52775237	52775549	PotentialPeaks_H3K27Ac_peak_1995	70	.	2.83892	9.10511	7.09274	93
chr1	52783262	52784394	PotentialPeaks_H3K27Ac_peak_1996	2101	.	9.40585	213.106	210.121	372
chr1	52814529	52814757	PotentialPeaks_H3K27Ac_peak_1997	173	.	3.9958	19.6541	17.393	100
chr1	52815256	52815877	PotentialPeaks_H3K27Ac_peak_1998	729	.	8.65194	75.6461	72.9967	318
chr1	52855397	52855651	PotentialPeaks_H3K27Ac_peak_1999	70	.	2.83892	9.10511	7.09274	119
chr1	52856006	52856549	PotentialPeaks_H3K27Ac_peak_2000	95	.	3.17688	11.6917	9.59507	247
[truncated: 138,641 more rows]

## Sheet: Enrichement_AllPotentialPeaks
	width	NP_Merged	TND1_Merged	TND10_Merged	Input	NP_MergedEnrichment	TND1_MergedEnrichment	TND10_MergedEnrichment
PotentialPeaks_H3K27Ac_peak_1	281	16	13	17	10	0.410722	0.268703	0.455116
PotentialPeaks_H3K27Ac_peak_2	187	17	13	15	9	0.504323	0.31791	0.414125
PotentialPeaks_H3K27Ac_peak_3	151	15	14	5	10	0.364918	0.317612	-0.196961
PotentialPeaks_H3K27Ac_peak_4	228	24	18	15	18	0.3898	0.155334	0.022068
PotentialPeaks_H3K27Ac_peak_5	294	17	12	30	15	0.231493	-0.00554634	0.710661
PotentialPeaks_H3K27Ac_peak_6	229	11	14	25	16	-0.0988608	0.0531423	0.503804
PotentialPeaks_H3K27Ac_peak_7	485	35	17	40	8	1.1833	0.555267	1.31823
PotentialPeaks_H3K27Ac_peak_8	151	6	4	9	9	-0.0806397	-0.218143	0.103785
PotentialPeaks_H3K27Ac_peak_9	434	19	27	38	11	0.492421	0.789403	1.11803
PotentialPeaks_H3K27Ac_peak_10	151	8	11	6	3	0.381638	0.551563	0.256107
PotentialPeaks_H3K27Ac_peak_11	355	16	70	22	25	-0.177111	1.24915	0.0708169
PotentialPeaks_H3K27Ac_peak_12	1273	72	393	123	71	0.263484	2.48001	0.922993
PotentialPeaks_H3K27Ac_peak_13	203	9	37	20	7	0.207539	1.2916	0.733608
PotentialPeaks_H3K27Ac_peak_14	227	7	17	13	9	-0.0165094	0.504323	0.31791
PotentialPeaks_H3K27Ac_peak_15	180	11	19	5	2	0.616206	0.990601	0.253636
PotentialPeaks_H3K27Ac_peak_16	177	13	9	10	10	0.268703	0.054578	0.111162
PotentialPeaks_H3K27Ac_peak_17	176	7	15	5	6	0.142061	0.572696	0.0108167
PotentialPeaks_H3K27Ac_peak_18	1020	335	1099	654	34	3.01423	4.68173	3.94692
PotentialPeaks_H3K27Ac_peak_19	909	243	607	720	30	2.68712	3.9534	4.19387
PotentialPeaks_H3K27Ac_peak_20	175	8	16	13	14	-0.185901	0.229136	0.087117
PotentialPeaks_H3K27Ac_peak_21	178	10	14	5	5	0.375921	0.582372	0.0677984
PotentialPeaks_H3K27Ac_peak_22	222	45	14	2	6	1.54924	0.52539	-0.211576
PotentialPeaks_H3K27Ac_peak_23	479	97	32	9	37	1.30082	0.0656083	-0.875498
PotentialPeaks_H3K27Ac_peak_24	205	4	31	1	8	-0.167199	1.06546	-0.401664
PotentialPeaks_H3K27Ac_peak_25	629	43	53	41	23	0.771388	0.997269	0.721634
PotentialPeaks_H3K27Ac_peak_26	513	34	36	32	21	0.601606	0.65819	0.542713
PotentialPeaks_H3K27Ac_peak_27	301	32	24	22	11	0.948101	0.685066	0.611066
PotentialPeaks_H3K27Ac_peak_28	525	46	35	31	17	1.06073	0.778955	0.661118
PotentialPeaks_H3K27Ac_peak_29	500	70	65	102	13	1.6987	1.61229	2.15508
PotentialPeaks_H3K27Ac_peak_30	569	53	47	71	16	1.25478	1.12353	1.5892
PotentialPeaks_H3K27Ac_peak_31	1874	748	269	405	42	3.9364	2.51379	3.07665
PotentialPeaks_H3K27Ac_peak_32	290	36	27	44	10	1.11116	0.836987	1.31761
PotentialPeaks_H3K27Ac_peak_33	523	27	15	48	19	0.456487	-0.015581	1.03022
PotentialPeaks_H3K27Ac_peak_34	724	60	23	94	34	0.806827	-0.155698	1.34026
PotentialPeaks_H3K27Ac_peak_35	573	33	46	89	21	0.57246	0.911946	1.672
PotentialPeaks_H3K27Ac_peak_36	575	35	55	117	28	0.401847	0.879169	1.7847
PotentialPeaks_H3K27Ac_peak_37	391	22	31	42	19	0.27815	0.584812	0.888204
PotentialPeaks_H3K27Ac_peak_38	702	45	31	72	21	0.888487	0.512339	1.41718
PotentialPeaks_H3K27Ac_peak_39	1074	504	561	301	56	3.08685	3.23691	2.37282
PotentialPeaks_H3K27Ac_peak_40	860	128	29	55	38	1.6254	-0.0526701	0.605224
PotentialPeaks_H3K27Ac_peak_41	426	55	31	42	21	1.1075	0.512339	0.815731
PotentialPeaks_H3K27Ac_peak_42	164	20	3	7	6	0.788424	-0.133573	0.142061
PotentialPeaks_H3K27Ac_peak_43	378	36	16	31	28	0.429861	-0.270578	0.28401
PotentialPeaks_H3K27Ac_peak_44	365	26	15	28	24	0.247759	-0.190363	0.314873
PotentialPeaks_H3K27Ac_peak_45	883	84	38	90	35	1.1762	0.287228	1.26026
PotentialPeaks_H3K27Ac_peak_46	166	21	4	11	6	0.827953	-0.0595727	0.373387
PotentialPeaks_H3K27Ac_peak_47	343	31	19	30	13	0.827024	0.401718	0.795997
PotentialPeaks_H3K27Ac_peak_48	880	86	53	124	45	0.963037	0.399136	1.41989
PotentialPeaks_H3K27Ac_peak_49	197	19	7	19	3	0.925959	0.320238	0.925959
PotentialPeaks_H3K27Ac_peak_50	523	84	44	56	25	1.46675	0.72978	0.992814
PotentialPeaks_H3K27Ac_peak_51	218	14	4	16	14	0.136027	-0.448936	0.229136
PotentialPeaks_H3K27Ac_peak_52	1012	723	466	331	55	3.61306	2.99652	2.52242
PotentialPeaks_H3K27Ac_peak_53	969	939	535	298	36	4.40562	3.61217	2.80088
PotentialPeaks_H3K27Ac_peak_54	578	228	176	124	51	2.09363	1.74786	1.29218
PotentialPeaks_H3K27Ac_peak_55	902	904	634	288	35	4.37783	3.87664	2.78027
PotentialPeaks_H3K27Ac_peak_56	812	49	47	85	29	0.721932	0.676845	1.35778
PotentialPeaks_H3K27Ac_peak_57	468	29	22	39	21	0.449603	0.205678	0.73911
PotentialPeaks_H3K27Ac_peak_58	210	5	19	35	3	0.188993	0.925959	1.4691
PotentialPeaks_H3K27Ac_peak_59	1628	187	279	473	44	1.97838	2.51761	3.24673
PotentialPeaks_H3K27Ac_peak_60	590	25	92	291	7	0.921235	2.31857	3.82578
PotentialPeaks_H3K27Ac_peak_61	321	11	28	72	14	-0.0159765	0.688568	1.68857
PotentialPeaks_H3K27Ac_peak_62	938	443	413	320	38	3.29783	3.20031	2.84779
PotentialPeaks_H3K27Ac_peak_63	212	12	15	12	16	-0.0463933	0.100448	-0.0463933
PotentialPeaks_H3K27Ac_peak_64	340	23	24	22	23	0.174147	0.210673	0.136672
PotentialPeaks_H3K27Ac_peak_65	642	56	58	77	33	0.755882	0.79541	1.12512
PotentialPeaks_H3K27Ac_peak_66	443	6	10	61	39	-1.10983	-0.868821	0.697526
PotentialPeaks_H3K27Ac_peak_67	348	15	16	40	31	-0.404161	-0.358357	0.448998
PotentialPeaks_H3K27Ac_peak_68	505	49	30	48	30	0.692681	0.193875	0.670313
PotentialPeaks_H3K27Ac_peak_69	1217	2140	1629	666	40	5.48056	5.09029	3.82005
PotentialPeaks_H3K27Ac_peak_70	212	14	8	8	13	0.179326	-0.142602	-0.142602
PotentialPeaks_H3K27Ac_peak_71	167	6	17	11	13	-0.268133	0.316829	0.0273225
PotentialPeaks_H3K27Ac_peak_72	252	19	10	11	16	0.275535	-0.153309	-0.0988608
PotentialPeaks_H3K27Ac_peak_73	235	35	17	6	5	1.34791	0.719875	0.134913
PotentialPeaks_H3K27Ac_peak_74	416	119	92	38	7	2.6405	2.31857	1.31857
PotentialPeaks_H3K27Ac_peak_75	151	15	6	9	11	0.317334	-0.17743	0.00699432
PotentialPeaks_H3K27Ac_peak_76	187	15	8	3	5	0.629677	0.260443	-0.0765915
PotentialPeaks_H3K27Ac_peak_77	155	10	15	4	14	-0.0704243	0.183332	-0.448936
PotentialPeaks_H3K27Ac_peak_78	221	4	9	26	23	-0.789327	-0.467399	0.281062
PotentialPeaks_H3K27Ac_peak_79	217	9	15	12	10	0.054578	0.364918	0.218077
PotentialPeaks_H3K27Ac_peak_80	175	12	11	5	3	0.604031	0.551563	0.188993
PotentialPeaks_H3K27Ac_peak_81	226	8	35	6	14	-0.185901	0.901561	-0.311432
PotentialPeaks_H3K27Ac_peak_82	309	8	32	33	8	0.0958357	1.09584	1.12558
PotentialPeaks_H3K27Ac_peak_83	796	45	152	59	45	0.221349	1.68293	0.51943
PotentialPeaks_H3K27Ac_peak_84	320	22	46	15	12	0.565001	1.27127	0.27127
PotentialPeaks_H3K27Ac_peak_85	155	2	8	10	4	-0.0952689	0.319769	0.435246
PotentialPeaks_H3K27Ac_peak_86	652	146	210	64	22	2.26268	2.74301	1.24476
PotentialPeaks_H3K27Ac_peak_87	1377	455	703	87	79	2.56184	3.17211	0.368762
PotentialPeaks_H3K27Ac_peak_88	391	73	146	23	22	1.39857	2.26268	0.208237
PotentialPeaks_H3K27Ac_peak_89	331	74	221	17	15	1.67895	3.07584	0.231493
PotentialPeaks_H3K27Ac_peak_90	173	27	70	3	11	0.789403	1.7894	-0.388934
PotentialPeaks_H3K27Ac_peak_91	204	14	18	7	8	0.417764	0.598336	0.0344352
PotentialPeaks_H3K27Ac_peak_92	177	6	24	3	9	-0.0806397	0.781857	-0.292144
PotentialPeaks_H3K27Ac_peak_93	521	65	102	17	39	0.770589	1.31338	-0.524866
PotentialPeaks_H3K27Ac_peak_94	308	25	52	9	23	0.246296	0.976207	-0.467399
PotentialPeaks_H3K27Ac_peak_95	196	33	51	9	17	0.721239	1.17262	-0.249614
PotentialPeaks_H3K27Ac_peak_96	408	95	148	26	16	1.94067	2.5038	0.538569
PotentialPeaks_H3K27Ac_peak_97	700	124	214	46	36	1.63554	2.35175	0.460458
PotentialPeaks_H3K27Ac_peak_98	833	116	388	42	36	1.55066	3.16447	0.364243
PotentialPeaks_H3K27Ac_peak_99	948	119	338	37	59	1.08531	2.4761	-0.263584
PotentialPeaks_H3K27Ac_peak_100	341	6	16	43	19	-0.510346	0.0302227	0.912866
PotentialPeaks_H3K27Ac_peak_101	288	13	15	33	13	0.130416	0.226631	0.887145
PotentialPeaks_H3K27Ac_peak_102	234	4	17	34	16	-0.53182	0.190646	0.790108
PotentialPeaks_H3K27Ac_peak_103	318	6	17	41	34	-0.981669	-0.396706	0.39179
PotentialPeaks_H3K27Ac_peak_104	470	23	41	60	14	0.514538	1.06203	1.47706
PotentialPeaks_H3K27Ac_peak_105	172	5	18	12	7	-0.0439997	0.651146	0.371038
PotentialPeaks_H3K27Ac_peak_106	813	67	54	110	43	0.710865	0.465108	1.31311
PotentialPeaks_H3K27Ac_peak_107	169	12	20	7	22	-0.26981	0.0927597	-0.553603
PotentialPeaks_H3K27Ac_peak_108	292	24	27	42	18	0.3898	0.494136	0.925853
PotentialPeaks_H3K27Ac_peak_109	320	51	19	6	22	0.988924	0.0521177	-0.617734
PotentialPeaks_H3K27Ac_peak_110	177	24	6	4	5	0.997409	0.134913	-0.00259095
PotentialPeaks_H3K27Ac_peak_111	895	1218	1139	814	63	4.20621	4.11076	3.63405
PotentialPeaks_H3K27Ac_peak_112	689	668	615	423	45	3.70846	3.59211	3.06869
PotentialPeaks_H3K27Ac_peak_113	389	30	13	25	20	0.517093	-0.148488	0.351083
PotentialPeaks_H3K27Ac_peak_114	188	15	5	18	11	0.317334	-0.244544	0.450601
PotentialPeaks_H3K27Ac_peak_115	437	35	28	28	26	0.463481	0.250487	0.250487
PotentialPeaks_H3K27Ac_peak_116	388	49	11	26	17	1.1289	-0.138583	0.498847
PotentialPeaks_H3K27Ac_peak_117	605	33	9	92	31	0.256353	-0.714501	1.39653
PotentialPeaks_H3K27Ac_peak_118	770	47	33	136	30	0.647593	0.285023	1.91824
PotentialPeaks_H3K27Ac_peak_119	261	40	8	10	15	0.994454	-0.227939	-0.112462
PotentialPeaks_H3K27Ac_peak_120	172	11	12	10	5	0.430368	0.482836	0.375921
PotentialPeaks_H3K27Ac_peak_121	161	19	5	0	9	0.589212	-0.147754	-0.540071
PotentialPeaks_H3K27Ac_peak_122	262	37	9	3	20	0.721452	-0.362612	-0.758541
PotentialPeaks_H3K27Ac_peak_123	247	48	9	4	24	0.855441	-0.500703	-0.822631
PotentialPeaks_H3K27Ac_peak_124	374	59	16	12	13	1.50125	0.272435	0.07979
PotentialPeaks_H3K27Ac_peak_125	347	67	5	8	25	1.19793	-0.784793	-0.592148
PotentialPeaks_H3K27Ac_peak_126	235	25	7	11	4	1.09236	0.258368	0.489694
PotentialPeaks_H3K27Ac_peak_127	161	3	29	3	5	-0.0765915	1.16733	-0.0765915
PotentialPeaks_H3K27Ac_peak_128	190	38	11	17	4	1.48969	0.489694	0.7792
PotentialPeaks_H3K27Ac_peak_129	366	440	330	276	12	4.14996	3.7517	3.5069
PotentialPeaks_H3K27Ac_peak_130	653	495	316	287	9	4.45711	3.83497	3.7031
PotentialPeaks_H3K27Ac_peak_131	308	60	31	38	5	1.92341	1.23007	1.43037
PotentialPeaks_H3K27Ac_peak_132	279	39	16	33	17	0.887889	0.106529	0.721239
PotentialPeaks_H3K27Ac_peak_133	151	8	1	12	5	0.260443	-0.237056	0.482836
PotentialPeaks_H3K27Ac_peak_134	184	26	5	6	3	1.18899	0.188993	0.256107
PotentialPeaks_H3K27Ac_peak_135	173	21	4	9	4	0.94426	0.0567342	0.378662
PotentialPeaks_H3K27Ac_peak_136	305	35	14	8	15	0.859524	0.0939893	-0.227939
PotentialPeaks_H3K27Ac_peak_137	151	12	6	11	7	0.371038	0.0231145	0.31857
PotentialPeaks_H3K27Ac_peak_138	822	123	130	57	40	1.52536	1.59624	0.596244
PotentialPeaks_H3K27Ac_peak_139	1754	71	178	580	57	0.488518	1.64549	3.26474
PotentialPeaks_H3K27Ac_peak_140	236	45	17	12	13	1.20317	0.316829	0.07979
PotentialPeaks_H3K27Ac_peak_141	871	633	349	165	26	4.13313	3.30281	2.2909
PotentialPeaks_H3K27Ac_peak_142	610	58	35	144	24	1.06489	0.527867	2.17737
PotentialPeaks_H3K27Ac_peak_143	981	32	40	277	57	-0.369463	-0.14707	2.24033
PotentialPeaks_H3K27Ac_peak_144	676	29	32	190	25	0.314742	0.407852	2.50939
PotentialPeaks_H3K27Ac_peak_145	410	22	21	39	15	0.435026	0.396552	0.968458
PotentialPeaks_H3K27Ac_peak_146	160	9	15	6	6	0.262355	0.572696	0.0779309
PotentialPeaks_H3K27Ac_peak_147	248	10	32	6	15	-0.112462	0.772061	-0.35347
PotentialPeaks_H3K27Ac_peak_148	282	33	41	13	16	0.760962	0.979142	0.00423273
PotentialPeaks_H3K27Ac_peak_149	402	46	86	6	26	0.745252	1.46348	-0.749513
PotentialPeaks_H3K27Ac_peak_150	180	15	14	5	14	0.183332	0.136027	-0.378547
PotentialPeaks_H3K27Ac_peak_151	1845	517	175	105	73	2.83062	1.35006	0.69149
PotentialPeaks_H3K27Ac_peak_152	170	26	10	8	4	1.12712	0.435246	0.319769
PotentialPeaks_H3K27Ac_peak_153	162	14	3	9	3	0.703566	0.0446034	0.440532
PotentialPeaks_H3K27Ac_peak_154	517	29	16	43	15	0.678952	0.187099	1.06974
PotentialPeaks_H3K27Ac_peak_155	691	59	40	99	27	0.988728	0.567265	1.6054
PotentialPeaks_H3K27Ac_peak_156	812	60	52	137	32	0.861459	0.700994	1.87092
PotentialPeaks_H3K27Ac_peak_157	216	21	3	36	8	0.720327	-0.241199	1.21131
PotentialPeaks_H3K27Ac_peak_158	170	15	6	25	12	0.27127	-0.223495	0.674626
PotentialPeaks_H3K27Ac_peak_159	1087	84	62	232	54	0.7469	0.388446	2.05724
PotentialPeaks_H3K27Ac_peak_160	320	27	15	76	11	0.789403	0.317334	1.8867
PotentialPeaks_H3K27Ac_peak_161	194	20	17	6	9	0.629854	0.504323	-0.0806397
PotentialPeaks_H3K27Ac_peak_162	498	48	32	30	24	0.855441	0.440404	0.379003
PotentialPeaks_H3K27Ac_peak_163	153	28	17	1	4	1.19424	0.7792	-0.177731
PotentialPeaks_H3K27Ac_peak_164	368	142	61	5	19	2.334	1.29701	-0.57746
PotentialPeaks_H3K27Ac_peak_165	640	263	127	10	26	2.91518	1.95093	-0.508504
PotentialPeaks_H3K27Ac_peak_166	196	47	22	2	11	1.34042	0.611066	-0.466937
PotentialPeaks_H3K27Ac_peak_167	158	44	23	4	9	1.36682	0.745331	-0.218143
PotentialPeaks_H3K27Ac_peak_168	1414	258	168	31	74	1.8552	1.28073	-0.688244
PotentialPeaks_H3K27Ac_peak_169	194	22	19	3	6	0.866427	0.747782	-0.133573
PotentialPeaks_H3K27Ac_peak_170	881	852	337	107	15	4.94865	3.65062	2.12961
PotentialPeaks_H3K27Ac_peak_171	596	425	141	98	29	3.4842	1.99419	1.53245
PotentialPeaks_H3K27Ac_peak_172	1023	908	775	465	34	4.41065	4.18643	3.46879
PotentialPeaks_H3K27Ac_peak_173	945	246	92	81	24	2.88886	1.61033	1.45535
PotentialPeaks_H3K27Ac_peak_174	441	72	26	32	12	1.77651	0.709391	0.902036
PotentialPeaks_H3K27Ac_peak_175	303	95	43	44	13	2.06685	1.15508	1.17933
PotentialPeaks_H3K27Ac_peak_176	833	1555	1113	320	41	4.99997	4.52333	2.77482
PotentialPeaks_H3K27Ac_peak_177	302	38	20	2	4	1.48969	0.904731	-0.0952689
PotentialPeaks_H3K27Ac_peak_178	723	1747	1816	1221	34	5.34272	5.3981	4.83153
PotentialPeaks_H3K27Ac_peak_179	449	1010	706	283	11	5.36595	4.85899	3.58714
PotentialPeaks_H3K27Ac_peak_180	155	18	7	3	4	0.822269	0.258368	-0.0172663
PotentialPeaks_H3K27Ac_peak_181	197	23	15	5	5	0.960883	0.629677	0.0677984
PotentialPeaks_H3K27Ac_peak_182	496	51	55	27	24	0.92153	1.00519	0.281706
PotentialPeaks_H3K27Ac_peak_183	385	33	43	14	18	0.682581	0.950515	-0.0252378
PotentialPeaks_H3K27Ac_peak_184	301	40	17	12	20	0.800886	0.0379255	-0.199114
PotentialPeaks_H3K27Ac_peak_185	268	26	15	29	14	0.621453	0.183332	0.720989
PotentialPeaks_H3K27Ac_peak_186	1583	2363	1955	716	36	5.7224	5.45097	4.02196
PotentialPeaks_H3K27Ac_peak_187	178	12	7	9	16	-0.0463933	-0.330186	-0.209892
PotentialPeaks_H3K27Ac_peak_188	226	30	4	10	12	0.840636	-0.360998	0.0175136
PotentialPeaks_H3K27Ac_peak_189	211	22	4	11	6	0.866427	-0.0595727	0.373387
PotentialPeaks_H3K27Ac_peak_190	156	15	8	9	5	0.629677	0.260443	0.319337
PotentialPeaks_H3K27Ac_peak_191	1065	228	78	96	43	2.26656	0.890414	1.14318
PotentialPeaks_H3K27Ac_peak_192	292	47	18	16	21	0.93503	0.0452129	-0.04225
PotentialPeaks_H3K27Ac_peak_193	177	20	3	7	7	0.733608	-0.18839	0.0872448
PotentialPeaks_H3K27Ac_peak_194	157	15	2	15	6	0.572696	-0.211576	0.572696
PotentialPeaks_H3K27Ac_peak_195	319	15	13	35	12	0.27127	0.175055	0.989499
PotentialPeaks_H3K27Ac_peak_196	294	18	11	25	17	0.193992	-0.138583	0.464081
PotentialPeaks_H3K27Ac_peak_197	151	11	16	0	7	0.31857	0.563683	-0.436317
PotentialPeaks_H3K27Ac_peak_198	248	17	16	14	11	0.407532	0.363138	0.270029
PotentialPeaks_H3K27Ac_peak_199	213	14	10	11	15	0.0939893	-0.112462	-0.0580138
PotentialPeaks_H3K27Ac_peak_200	273	28	55	10	19	0.489654	1.17997	-0.269338
PotentialPeaks_H3K27Ac_peak_201	464	101	222	36	25	1.69325	2.71771	0.523329
PotentialPeaks_H3K27Ac_peak_202	251	33	66	12	15	0.801809	1.54465	-0.00554634
PotentialPeaks_H3K27Ac_peak_203	313	9	13	36	6	0.262355	0.47648	1.31894
PotentialPeaks_H3K27Ac_peak_204	197	9	12	10	8	0.154729	0.318228	0.211313
PotentialPeaks_H3K27Ac_peak_205	217	11	11	7	14	-0.0159765	-0.0159765	-0.247302
PotentialPeaks_H3K27Ac_peak_206	161	9	11	6	4	0.378662	0.489694	0.194238
PotentialPeaks_H3K27Ac_peak_207	152	7	25	4	13	-0.204003	0.629987	-0.405637
PotentialPeaks_H3K27Ac_peak_208	186	13	16	3	5	0.533462	0.675481	-0.0765915
PotentialPeaks_H3K27Ac_peak_209	180	12	20	2	10	0.218077	0.580647	-0.419353
PotentialPeaks_H3K27Ac_peak_210	433	35	67	6	31	0.314068	1.01668	-0.898926
PotentialPeaks_H3K27Ac_peak_211	151	11	15	2	10	0.165609	0.364918	-0.419353
PotentialPeaks_H3K27Ac_peak_212	263	32	22	3	10	0.995684	0.658649	-0.341351
PotentialPeaks_H3K27Ac_peak_213	675	375	161	70	30	3.28134	2.13792	1.09658
PotentialPeaks_H3K27Ac_peak_214	362	33	30	5	17	0.721239	0.630091	-0.501153
PotentialPeaks_H3K27Ac_peak_215	284	17	17	15	14	0.27353	0.27353	0.183332
PotentialPeaks_H3K27Ac_peak_216	165	11	24	3	10	0.165609	0.73265	-0.341351
PotentialPeaks_H3K27Ac_peak_217	163	19	11	6	6	0.747782	0.373387	0.0779309
PotentialPeaks_H3K27Ac_peak_218	186	4	8	19	14	-0.448936	-0.185901	0.358419
PotentialPeaks_H3K27Ac_peak_219	189	18	21	4	6	0.705962	0.827953	-0.0595727
PotentialPeaks_H3K27Ac_peak_220	248	10	41	10	9	0.160368	1.29282	0.160368
PotentialPeaks_H3K27Ac_peak_221	337	27	30	18	17	0.532794	0.630091	0.193992
PotentialPeaks_H3K27Ac_peak_222	400	27	46	10	25	0.249154	0.777086	-0.476671
PotentialPeaks_H3K27Ac_peak_223	749	96	76	114	20	1.80089	1.51709	2.0159
PotentialPeaks_H3K27Ac_peak_224	411	21	17	43	31	-0.148904	-0.313963	0.524286
PotentialPeaks_H3K27Ac_peak_225	322	16	11	41	20	-0.00646867	-0.251581	0.826421
PotentialPeaks_H3K27Ac_peak_226	714	43	49	82	34	0.441543	0.581267	1.17361
PotentialPeaks_H3K27Ac_peak_227	181	16	8	10	11	0.363138	-0.0518994	0.0635779
PotentialPeaks_H3K27Ac_peak_228	151	7	2	17	7	0.0872448	-0.266392	0.608077
PotentialPeaks_H3K27Ac_peak_229	199	8	3	17	6	0.203462	-0.133573	0.662893
PotentialPeaks_H3K27Ac_peak_230	479	19	35	47	31	-0.229074	0.314068	0.618923
PotentialPeaks_H3K27Ac_peak_231	184	6	12	17	21	-0.582818	-0.234895	0.00214413
PotentialPeaks_H3K27Ac_peak_232	399	31	25	32	26	0.345645	0.148608	0.376018
PotentialPeaks_H3K27Ac_peak_233	391	36	41	24	23	0.589184	0.721634	0.210673
PotentialPeaks_H3K27Ac_peak_234	501	49	67	43	34	0.581267	0.933939	0.441543
PotentialPeaks_H3K27Ac_peak_235	268	24	17	11	13	0.594363	0.316829	0.0273225
PotentialPeaks_H3K27Ac_peak_236	901	65	209	95	27	1.09976	2.57369	1.55433
PotentialPeaks_H3K27Ac_peak_237	333	23	30	22	12	0.602476	0.840636	0.565001
PotentialPeaks_H3K27Ac_peak_238	233	16	22	9	10	0.410722	0.658649	0.054578
PotentialPeaks_H3K27Ac_peak_239	343	42	23	11	12	1.17505	0.602476	0.0719614
PotentialPeaks_H3K27Ac_peak_240	203	11	20	5	13	0.0273225	0.44236	-0.335248
PotentialPeaks_H3K27Ac_peak_241	280	21	19	30	15	0.396552	0.316382	0.710661
PotentialPeaks_H3K27Ac_peak_242	560	27	48	76	34	-0.0148357	0.5589	1.08246
PotentialPeaks_H3K27Ac_peak_243	153	6	9	1	7	0.0231145	0.207539	-0.348854
PotentialPeaks_H3K27Ac_peak_244	408	27	41	13	10	0.836987	1.24361	0.268703
PotentialPeaks_H3K27Ac_peak_245	1221	191	67	154	71	1.49754	0.179092	1.21344
PotentialPeaks_H3K27Ac_peak_246	279	21	14	7	22	0.132288	-0.170275	-0.553603
PotentialPeaks_H3K27Ac_peak_247	228	17	14	13	11	0.407532	0.270029	0.221119
PotentialPeaks_H3K27Ac_peak_248	203	16	12	13	10	0.410722	0.218077	0.268703
PotentialPeaks_H3K27Ac_peak_249	249	19	21	14	12	0.446357	0.526527	0.223964
PotentialPeaks_H3K27Ac_peak_250	525	74	37	22	21	1.4496	0.68567	0.205678
PotentialPeaks_H3K27Ac_peak_251	293	23	33	11	13	0.557837	0.887145	0.0273225
PotentialPeaks_H3K27Ac_peak_252	1723	219	200	183	105	1.22181	1.10018	0.981918
PotentialPeaks_H3K27Ac_peak_253	235	19	7	36	15	0.316382	-0.289339	0.887538
PotentialPeaks_H3K27Ac_peak_254	614	195	489	103	13	2.99353	4.25257	2.16725
PotentialPeaks_H3K27Ac_peak_255	1470	938	1761	639	57	3.94342	4.8408	3.40093
PotentialPeaks_H3K27Ac_peak_256	169	18	10	6	11	0.450601	0.0635779	-0.17743
PotentialPeaks_H3K27Ac_peak_257	1056	124	145	78	49	1.33351	1.53514	0.758814
PotentialPeaks_H3K27Ac_peak_258	195	8	9	17	11	-0.0518994	0.00699432	0.407532
PotentialPeaks_H3K27Ac_peak_259	151	12	9	3	9	0.267284	0.103785	-0.292144
PotentialPeaks_H3K27Ac_peak_260	151	13	9	11	10	0.268703	0.054578	0.165609
PotentialPeaks_H3K27Ac_peak_261	258	17	11	18	10	0.455116	0.165609	0.498185
PotentialPeaks_H3K27Ac_peak_262	151	12	10	6	8	0.318228	0.211313	-0.0296951
PotentialPeaks_H3K27Ac_peak_263	323	30	19	15	8	1.03444	0.640156	0.46507
PotentialPeaks_H3K27Ac_peak_264	261	6	21	12	8	-0.0296951	0.720327	0.318228
PotentialPeaks_H3K27Ac_peak_265	315	27	27	35	7	0.989948	0.989948	1.23611
PotentialPeaks_H3K27Ac_peak_266	257	16	22	30	14	0.229136	0.477064	0.752698
PotentialPeaks_H3K27Ac_peak_267	747	49	32	117	36	0.528629	0.0912241	1.56154
PotentialPeaks_H3K27Ac_peak_268	331	20	16	43	18	0.237797	0.0678716	0.950515
PotentialPeaks_H3K27Ac_peak_269	170	15	5	6	9	0.414125	-0.147754	-0.0806397
PotentialPeaks_H3K27Ac_peak_270	388	44	24	21	13	1.17933	0.594363	0.481888
PotentialPeaks_H3K27Ac_peak_271	196	19	9	11	9	0.589212	0.103785	0.214816
PotentialPeaks_H3K27Ac_peak_272	280	15	17	31	12	0.27127	0.361468	0.871663
PotentialPeaks_H3K27Ac_peak_273	284	15	20	34	15	0.141295	0.357024	0.830955
PotentialPeaks_H3K27Ac_peak_274	332	22	12	57	14	0.477064	0.0364909	1.41896
PotentialPeaks_H3K27Ac_peak_275	265	20	11	26	8	0.680798	0.265761	0.903191
PotentialPeaks_H3K27Ac_peak_276	936	35	28	141	45	-0.0369633	-0.249957	1.58523
PotentialPeaks_H3K27Ac_peak_277	247	29	13	14	17	0.598383	-0.0354895	0.0134201
PotentialPeaks_H3K27Ac_peak_278	189	12	9	9	10	0.218077	0.054578	0.054578
PotentialPeaks_H3K27Ac_peak_279	201	5	2	27	2	0.253636	0.0312432	1.28758
PotentialPeaks_H3K27Ac_peak_280	307	31	12	19	8	1.06546	0.318228	0.640156
PotentialPeaks_H3K27Ac_peak_281	159	14	5	10	6	0.52539	0.0108167	0.318939
PotentialPeaks_H3K27Ac_peak_282	165	22	8	6	2	1.10925	0.446281	0.32075
PotentialPeaks_H3K27Ac_peak_283	217	10	6	18	7	0.264123	0.0231145	0.651146
PotentialPeaks_H3K27Ac_peak_284	158	8	5	13	8	0.0958357	-0.0968093	0.368854
PotentialPeaks_H3K27Ac_peak_285	471	90	47	36	17	1.83445	1.08381	0.806969
PotentialPeaks_H3K27Ac_peak_286	404	46	29	33	19	0.984419	0.522076	0.644933
PotentialPeaks_H3K27Ac_peak_287	306	43	26	24	19	0.912866	0.42254	0.352151
PotentialPeaks_H3K27Ac_peak_288	262	16	11	20	13	0.272435	0.0273225	0.44236
PotentialPeaks_H3K27Ac_peak_289	316	19	21	27	10	0.540005	0.620175	0.836987
PotentialPeaks_H3K27Ac_peak_290	178	9	8	9	5	0.319337	0.260443	0.319337
PotentialPeaks_H3K27Ac_peak_291	200	21	7	17	13	0.481888	-0.204003	0.316829
PotentialPeaks_H3K27Ac_peak_292	566	55	36	57	12	1.46682	1.01751	1.5069
PotentialPeaks_H3K27Ac_peak_293	190	9	9	13	6	0.262355	0.262355	0.47648
PotentialPeaks_H3K27Ac_peak_294	272	14	15	12	18	-0.0252378	0.022068	-0.124773
PotentialPeaks_H3K27Ac_peak_295	297	19	17	17	13	0.401718	0.316829	0.316829
PotentialPeaks_H3K27Ac_peak_296	408	37	19	25	14	0.957056	0.358419	0.586688
PotentialPeaks_H3K27Ac_peak_297	237	23	11	12	7	0.849085	0.31857	0.371038
PotentialPeaks_H3K27Ac_peak_298	2044	6475	3144	1384	30	7.33454	6.29602	5.12152
PotentialPeaks_H3K27Ac_peak_299	242	18	23	4	13	0.359898	0.557837	-0.405637
PotentialPeaks_H3K27Ac_peak_300	817	1394	771	376	15	5.64858	4.80732	3.80181
PotentialPeaks_H3K27Ac_peak_301	1034	536	263	316	56	3.173	2.1886	2.43952
PotentialPeaks_H3K27Ac_peak_302	181	17	11	11	17	0.150924	-0.138583	-0.138583
PotentialPeaks_H3K27Ac_peak_303	157	8	7	3	7	0.148645	0.0872448	-0.18839
PotentialPeaks_H3K27Ac_peak_304	543	65	35	42	66	0.225597	-0.441828	-0.256272
PotentialPeaks_H3K27Ac_peak_305	392	31	29	21	54	-0.342367	-0.405103	-0.687503
PotentialPeaks_H3K27Ac_peak_306	450	27	24	70	41	-0.191233	-0.29557	0.808767
PotentialPeaks_H3K27Ac_peak_307	153	11	11	4	16	-0.0988608	-0.0988608	-0.53182
PotentialPeaks_H3K27Ac_peak_308	260	32	15	0	16	0.731214	0.100448	-0.853748
PotentialPeaks_H3K27Ac_peak_309	216	15	18	5	12	0.27127	0.404537	-0.290609
PotentialPeaks_H3K27Ac_peak_310	354	13	27	23	16	0.00423273	0.572516	0.431654
PotentialPeaks_H3K27Ac_peak_311	316	26	30	11	16	0.538569	0.669814	-0.0988608
PotentialPeaks_H3K27Ac_peak_312	193	13	38	6	15	0.0450797	0.941986	-0.35347
PotentialPeaks_H3K27Ac_peak_313	289	18	25	15	21	0.0452129	0.315302	-0.0880537
PotentialPeaks_H3K27Ac_peak_314	155	9	12	12	6	0.262355	0.425854	0.425854
PotentialPeaks_H3K27Ac_peak_315	175	10	6	17	5	0.375921	0.134913	0.719875
PotentialPeaks_H3K27Ac_peak_316	189	9	11	15	8	0.154729	0.265761	0.46507
PotentialPeaks_H3K27Ac_peak_317	206	12	12	12	9	0.267284	0.267284	0.267284
PotentialPeaks_H3K27Ac_peak_318	156	11	18	3	8	0.265761	0.598336	-0.241199
PotentialPeaks_H3K27Ac_peak_319	178	13	10	1	2	0.719299	0.561758	-0.051219
PotentialPeaks_H3K27Ac_peak_320	536	54	24	21	24	0.984724	0.177369	0.0648946
PotentialPeaks_H3K27Ac_peak_321	160	17	9	7	5	0.719875	0.319337	0.199043
PotentialPeaks_H3K27Ac_peak_322	151	7	8	9	8	0.0344352	0.0958357	0.154729
PotentialPeaks_H3K27Ac_peak_323	174	12	1	20	9	0.267284	-0.452609	0.629854
PotentialPeaks_H3K27Ac_peak_324	258	16	6	20	5	0.675481	0.134913	0.845406
PotentialPeaks_H3K27Ac_peak_325	984	151	144	34	47	1.63048	1.5687	-0.109372
PotentialPeaks_H3K27Ac_peak_326	191	19	29	9	9	0.589212	0.951782	0.103785
PotentialPeaks_H3K27Ac_peak_327	240	18	34	9	8	0.598336	1.15473	0.154729
PotentialPeaks_H3K27Ac_peak_328	392	52	44	16	15	1.27456	1.09399	0.187099
PotentialPeaks_H3K27Ac_peak_329	539	69	71	30	34	0.968291	1.00184	0.0824615
PotentialPeaks_H3K27Ac_peak_330	322	36	71	13	27	0.460349	1.20285	-0.382109
PotentialPeaks_H3K27Ac_peak_331	316	53	55	27	19	1.13875	1.17997	0.456487
PotentialPeaks_H3K27Ac_peak_332	411	55	70	61	13	1.42218	1.6987	1.53922
PotentialPeaks_H3K27Ac_peak_333	496	46	55	21	33	0.540153	0.735704	-0.20459
PotentialPeaks_H3K27Ac_peak_334	848	99	72	38	39	1.27623	0.890171	0.185627
PotentialPeaks_H3K27Ac_peak_335	245	17	20	20	15	0.231493	0.357024	0.357024
PotentialPeaks_H3K27Ac_peak_336	151	7	14	4	18	-0.408566	-0.0252378	-0.6102
PotentialPeaks_H3K27Ac_peak_337	205	18	31	13	13	0.359898	0.827024	0.130416
PotentialPeaks_H3K27Ac_peak_338	332	22	27	24	14	0.477064	0.655401	0.551064
PotentialPeaks_H3K27Ac_peak_339	189	14	15	14	4	0.641697	0.689002	0.641697
PotentialPeaks_H3K27Ac_peak_340	223	16	10	9	10	0.410722	0.111162	0.054578
PotentialPeaks_H3K27Ac_peak_341	164	12	0	18	8	0.318228	-0.489127	0.598336
PotentialPeaks_H3K27Ac_peak_342	442	16	26	33	27	-0.24009	0.152227	0.374619
PotentialPeaks_H3K27Ac_peak_343	449	34	74	15	18	0.711728	1.55972	0.022068
PotentialPeaks_H3K27Ac_peak_344	151	37	32	15	10	1.13864	0.995684	0.364918
PotentialPeaks_H3K27Ac_peak_345	973	799	801	374	45	3.96127	3.9648	2.89794
PotentialPeaks_H3K27Ac_peak_346	288	30	15	10	18	0.591434	0.022068	-0.231689
PotentialPeaks_H3K27Ac_peak_347	226	19	11	12	4	0.864089	0.489694	0.542161
PotentialPeaks_H3K27Ac_peak_348	153	9	15	5	6	0.262355	0.572696	0.0108167
PotentialPeaks_H3K27Ac_peak_349	391	43	27	9	20	0.876174	0.419796	-0.362612
PotentialPeaks_H3K27Ac_peak_350	198	28	14	5	14	0.688568	0.136027	-0.378547
PotentialPeaks_H3K27Ac_peak_351	601	55	43	25	23	1.03849	0.771388	0.246296
PotentialPeaks_H3K27Ac_peak_352	160	11	12	7	11	0.118026	0.170493	-0.1133
PotentialPeaks_H3K27Ac_peak_353	331	20	23	10	26	-0.0390191	0.0764581	-0.508504
PotentialPeaks_H3K27Ac_peak_354	179	5	20	4	9	-0.147754	0.629854	-0.218143
PotentialPeaks_H3K27Ac_peak_355	265	20	42	8	16	0.316177	1.00423	-0.268786
PotentialPeaks_H3K27Ac_peak_356	180	1	13	7	8	-0.401664	0.368854	0.0344352
PotentialPeaks_H3K27Ac_peak_357	971	209	113	37	33	2.39974	1.59718	0.313877
PotentialPeaks_H3K27Ac_peak_358	624	33	40	52	40	0.0211289	0.213774	0.493882
PotentialPeaks_H3K27Ac_peak_359	389	7	8	118	24	-0.620997	-0.559596	1.92153
PotentialPeaks_H3K27Ac_peak_360	448	16	31	68	18	0.0678716	0.622461	1.46019
PotentialPeaks_H3K27Ac_peak_361	167	9	15	6	9	0.103785	0.414125	-0.0806397
PotentialPeaks_H3K27Ac_peak_362	303	15	20	13	23	-0.157059	0.0586695	-0.253275
PotentialPeaks_H3K27Ac_peak_363	167	13	8	6	1	0.786974	0.513956	0.388425
PotentialPeaks_H3K27Ac_peak_364	177	14	12	6	2	0.768209	0.668673	0.32075
PotentialPeaks_H3K27Ac_peak_365	230	12	5	20	12	0.124429	-0.290609	0.486999
PotentialPeaks_H3K27Ac_peak_366	245	8	21	11	11	-0.0518994	0.572591	0.118026
PotentialPeaks_H3K27Ac_peak_367	239	11	15	29	9	0.214816	0.414125	0.951782
PotentialPeaks_H3K27Ac_peak_368	151	8	4	16	3	0.381638	0.118604	0.796676
PotentialPeaks_H3K27Ac_peak_369	833	121	111	93	24	1.95347	1.84413	1.62363
PotentialPeaks_H3K27Ac_peak_370	604	41	43	33	17	0.939419	0.989173	0.721239
PotentialPeaks_H3K27Ac_peak_371	1375	348	573	650	39	2.93853	3.63286	3.81012
PotentialPeaks_H3K27Ac_peak_372	183	17	13	1	5	0.719875	0.533462	-0.237056
PotentialPeaks_H3K27Ac_peak_373	216	17	28	2	16	0.190646	0.605683	-0.683823
PotentialPeaks_H3K27Ac_peak_374	152	14	12	0	13	0.179326	0.07979	-0.727565
PotentialPeaks_H3K27Ac_peak_375	160	16	5	11	8	0.510873	-0.0968093	0.265761
PotentialPeaks_H3K27Ac_peak_376	227	18	8	17	14	0.316599	-0.185901	0.27353
PotentialPeaks_H3K27Ac_peak_377	153	12	3	12	5	0.482836	-0.0765915	0.482836
PotentialPeaks_H3K27Ac_peak_378	519	67	46	33	28	1.10446	0.683618	0.344131
PotentialPeaks_H3K27Ac_peak_379	221	15	14	17	10	0.364918	0.317612	0.455116
PotentialPeaks_H3K27Ac_peak_380	229	11	7	24	9	0.214816	-0.0165094	0.781857
PotentialPeaks_H3K27Ac_peak_381	151	10	5	13	4	0.435246	0.127124	0.592787
PotentialPeaks_H3K27Ac_peak_382	170	8	6	14	3	0.381638	0.256107	0.703566
PotentialPeaks_H3K27Ac_peak_383	605	21	29	60	37	-0.309901	-0.0275011	0.728573
PotentialPeaks_H3K27Ac_peak_384	436	26	26	52	16	0.538569	0.538569	1.23371
PotentialPeaks_H3K27Ac_peak_385	151	7	14	2	10	-0.0657162	0.317612	-0.419353
PotentialPeaks_H3K27Ac_peak_386	394	31	45	41	17	0.661118	1.03727	0.939419
PotentialPeaks_H3K27Ac_peak_387	527	37	63	39	23	0.616665	1.19253	0.670104
PotentialPeaks_H3K27Ac_peak_388	234	12	32	5	11	0.170493	0.948101	-0.244544
PotentialPeaks_H3K27Ac_peak_389	649	51	82	30	32	0.67962	1.22824	0.137093
PotentialPeaks_H3K27Ac_peak_390	353	21	107	17	16	0.355705	2.08877	0.190646
PotentialPeaks_H3K27Ac_peak_391	225	17	75	2	8	0.555267	2.01867	-0.319202
PotentialPeaks_H3K27Ac_peak_392	287	21	44	22	3	1.00613	1.70357	1.0446
PotentialPeaks_H3K27Ac_peak_393	244	18	20	26	16	0.233715	0.316177	0.538569
PotentialPeaks_H3K27Ac_peak_394	281	29	15	19	6	1.11035	0.572696	0.747782
PotentialPeaks_H3K27Ac_peak_395	220	14	14	16	5	0.582372	0.582372	0.675481
PotentialPeaks_H3K27Ac_peak_396	476	17	96	24	45	-0.664995	1.09797	-0.387461
PotentialPeaks_H3K27Ac_peak_397	166	7	16	11	6	0.142061	0.618499	0.373387
PotentialPeaks_H3K27Ac_peak_398	190	11	27	6	12	0.0719614	0.743339	-0.223495
PotentialPeaks_H3K27Ac_peak_399	261	5	13	17	13	-0.335248	0.130416	0.316829
PotentialPeaks_H3K27Ac_peak_400	428	162	100	105	21	2.43348	1.81573	1.87661
PotentialPeaks_H3K27Ac_peak_401	828	1491	991	422	30	5.22778	4.64616	3.4451
PotentialPeaks_H3K27Ac_peak_402	151	13	5	4	2	0.719299	0.253636	0.183246
PotentialPeaks_H3K27Ac_peak_403	333	44	13	15	12	1.22396	0.175055	0.27127
PotentialPeaks_H3K27Ac_peak_404	251	13	19	10	9	0.31791	0.589212	0.160368
PotentialPeaks_H3K27Ac_peak_405	173	13	8	14	9	0.31791	0.0448912	0.366819
PotentialPeaks_H3K27Ac_peak_406	187	9	9	7	14	-0.127008	-0.127008	-0.247302
PotentialPeaks_H3K27Ac_peak_407	158	8	16	5	9	0.0448912	0.459929	-0.147754
PotentialPeaks_H3K27Ac_peak_408	232	15	9	9	3	0.750872	0.440532	0.440532
PotentialPeaks_H3K27Ac_peak_409	335	19	21	34	23	0.0180275	0.0981978	0.532601
PotentialPeaks_H3K27Ac_peak_410	507	25	25	57	26	0.148608	0.148608	0.98088
PotentialPeaks_H3K27Ac_peak_411	486	34	33	24	31	0.285499	0.256353	-0.0364292
PotentialPeaks_H3K27Ac_peak_412	788	130	146	35	37	1.67047	1.8205	0.153071
PotentialPeaks_H3K27Ac_peak_413	1833	2724	2628	1650	83	5.04498	4.99352	4.32719
PotentialPeaks_H3K27Ac_peak_414	324	209	114	76	11	3.17692	2.38551	1.8867
PotentialPeaks_H3K27Ac_peak_415	196	10	13	18	5	0.375921	0.533462	0.762944
PotentialPeaks_H3K27Ac_peak_416	340	11	13	27	14	-0.0159765	0.087117	0.655401
PotentialPeaks_H3K27Ac_peak_417	189	10	14	16	7	0.264123	0.470573	0.563683
PotentialPeaks_H3K27Ac_peak_418	313	12	18	24	9	0.267284	0.547391	0.781857
PotentialPeaks_H3K27Ac_peak_419	1752	77	82	301	73	0.311786	0.387337	2.08097
PotentialPeaks_H3K27Ac_peak_420	527	28	44	32	28	0.188853	0.636312	0.314384
PotentialPeaks_H3K27Ac_peak_421	224	8	11	18	2	0.446281	0.616206	0.948781
PotentialPeaks_H3K27Ac_peak_422	340	18	17	21	11	0.450601	0.407532	0.572591
PotentialPeaks_H3K27Ac_peak_423	277	32	16	18	8	1.09584	0.510873	0.598336
PotentialPeaks_H3K27Ac_peak_424	510	41	25	35	21	0.79064	0.315302	0.630175
PotentialPeaks_H3K27Ac_peak_425	195	13	8	15	8	0.368854	0.0958357	0.46507
PotentialPeaks_H3K27Ac_peak_426	161	8	14	9	8	0.0958357	0.417764	0.154729
PotentialPeaks_H3K27Ac_peak_427	524	19	48	98	18	0.197155	1.06787	1.90076
PotentialPeaks_H3K27Ac_peak_428	334	16	23	60	14	0.229136	0.514538	1.47706
PotentialPeaks_H3K27Ac_peak_429	672	40	122	97	32	0.420886	1.72206	1.43371
PotentialPeaks_H3K27Ac_peak_430	349	22	42	36	20	0.241459	0.851512	0.693971
PotentialPeaks_H3K27Ac_peak_431	565	21	72	62	19	0.239676	1.48965	1.31562
PotentialPeaks_H3K27Ac_peak_432	609	44	22	56	22	0.829725	0.170762	1.09276
PotentialPeaks_H3K27Ac_peak_433	191	10	10	14	18	-0.231689	-0.231689	-0.0252378
PotentialPeaks_H3K27Ac_peak_434	356	18	16	44	6	0.705962	0.618499	1.52539
PotentialPeaks_H3K27Ac_peak_435	165	13	16	6	3	0.654657	0.796676	0.256107
PotentialPeaks_H3K27Ac_peak_436	158	6	7	11	5	0.134913	0.199043	0.430368
PotentialPeaks_H3K27Ac_peak_437	185	13	12	10	10	0.268703	0.218077	0.111162
PotentialPeaks_H3K27Ac_peak_438	921	483	268	309	15	4.14999	3.33685	3.53139
PotentialPeaks_H3K27Ac_peak_439	502	288	415	327	10	3.65865	4.16227	3.83279
PotentialPeaks_H3K27Ac_peak_440	847	1356	905	597	28	5.15149	4.57648	3.98916
PotentialPeaks_H3K27Ac_peak_441	222	33	27	71	23	0.503454	0.315009	1.33169
PotentialPeaks_H3K27Ac_peak_442	1431	920	687	729	87	3.44032	3.02734	3.11105
PotentialPeaks_H3K27Ac_peak_443	856	1199	694	329	34	4.80564	4.03057	2.98935
PotentialPeaks_H3K27Ac_peak_444	1292	228	170	176	69	1.76691	1.37534	1.42114
PotentialPeaks_H3K27Ac_peak_445	332	30	30	18	12	0.840636	0.840636	0.404537
PotentialPeaks_H3K27Ac_peak_446	1143	270	116	35	19	3.19009	2.07462	0.702648
PotentialPeaks_H3K27Ac_peak_447	416	26	46	121	13	0.664752	1.22663	2.37047
PotentialPeaks_H3K27Ac_peak_448	447	20	44	10	18	0.237797	0.974762	-0.231689
PotentialPeaks_H3K27Ac_peak_449	168	8	12	5	11	-0.0518994	0.170493	-0.244544
PotentialPeaks_H3K27Ac_peak_450	174	3	25	13	9	-0.292144	0.817481	0.31791
PotentialPeaks_H3K27Ac_peak_451	831	101	94	118	15	2.05746	1.96846	2.25319
PotentialPeaks_H3K27Ac_peak_452	319	23	37	26	20	0.278934	0.721452	0.385849
PotentialPeaks_H3K27Ac_peak_453	356	55	18	3	30	0.82006	-0.242224	-1.08176
PotentialPeaks_H3K27Ac_peak_454	162	20	3	1	10	0.580647	-0.341351	-0.501815
PotentialPeaks_H3K27Ac_peak_455	194	27	5	2	5	1.10175	0.0677984	-0.154594
PotentialPeaks_H3K27Ac_peak_456	151	5	16	5	2	0.253636	0.861318	0.253636
PotentialPeaks_H3K27Ac_peak_457	265	37	17	6	12	1.04499	0.361468	-0.223495
PotentialPeaks_H3K27Ac_peak_458	190	12	19	3	19	-0.162422	0.159506	-0.72185
PotentialPeaks_H3K27Ac_peak_459	221	10	29	7	14	-0.0704243	0.720989	-0.247302
PotentialPeaks_H3K27Ac_peak_460	197	8	20	11	11	-0.0518994	0.533063	0.118026
PotentialPeaks_H3K27Ac_peak_461	203	14	14	5	12	0.223964	0.223964	-0.290609
PotentialPeaks_H3K27Ac_peak_462	268	5	36	11	15	-0.420584	0.887538	-0.0580138
PotentialPeaks_H3K27Ac_peak_463	445	98	84	5	41	1.21539	1.02636	-1.22518
PotentialPeaks_H3K27Ac_peak_464	1016	351	549	43	62	2.47424	3.09671	-0.162752
PotentialPeaks_H3K27Ac_peak_465	261	46	59	16	17	1.06073	1.33535	0.106529
PotentialPeaks_H3K27Ac_peak_466	154	8	11	4	15	-0.227939	-0.0580138	-0.490973
PotentialPeaks_H3K27Ac_peak_467	311	22	36	8	22	0.170762	0.623274	-0.492203
PotentialPeaks_H3K27Ac_peak_468	730	87	155	17	46	0.955026	1.68638	-0.687081
PotentialPeaks_H3K27Ac_peak_469	210	17	21	7	11	0.407532	0.572591	-0.1133
PotentialPeaks_H3K27Ac_peak_470	241	14	28	12	14	0.136027	0.688568	0.0364909
PotentialPeaks_H3K27Ac_peak_471	171	14	14	2	5	0.582372	0.582372	-0.154594
PotentialPeaks_H3K27Ac_peak_472	332	26	31	7	14	0.621453	0.783725	-0.247302
PotentialPeaks_H3K27Ac_peak_473	630	45	163	12	23	0.819482	2.37256	-0.303901
PotentialPeaks_H3K27Ac_peak_474	282	18	59	5	7	0.651146	1.7925	-0.0439997
PotentialPeaks_H3K27Ac_peak_475	386	20	66	2	19	0.200148	1.38777	-0.799852
PotentialPeaks_H3K27Ac_peak_476	1564	138	189	56	98	0.695343	1.10804	-0.401519
PotentialPeaks_H3K27Ac_peak_477	182	20	15	9	6	0.788424	0.572696	0.262355
PotentialPeaks_H3K27Ac_peak_478	156	3	19	5	23	-0.863328	0.0180275	-0.718938
PotentialPeaks_H3K27Ac_peak_479	179	8	15	13	9	0.0448912	0.414125	0.31791
PotentialPeaks_H3K27Ac_peak_480	362	14	63	46	19	-0.0628867	1.334	0.984419
PotentialPeaks_H3K27Ac_peak_481	369	41	134	27	21	0.79064	2.18657	0.384015
PotentialPeaks_H3K27Ac_peak_482	445	192	351	48	17	2.80697	3.62617	1.10653
PotentialPeaks_H3K27Ac_peak_483	351	81	153	41	15	1.78701	2.58798	1.01999
PotentialPeaks_H3K27Ac_peak_484	308	58	170	28	14	1.43859	2.76829	0.688568
PotentialPeaks_H3K27Ac_peak_485	194	30	83	15	10	0.934284	2.04008	0.364918
PotentialPeaks_H3K27Ac_peak_486	303	57	99	22	10	1.60055	2.25621	0.658649
PotentialPeaks_H3K27Ac_peak_487	158	13	12	4	9	0.31791	0.267284	-0.218143
PotentialPeaks_H3K27Ac_peak_488	579	37	110	12	42	0.0868952	1.33625	-0.83367
PotentialPeaks_H3K27Ac_peak_489	449	50	109	15	30	0.714707	1.6361	-0.375491
PotentialPeaks_H3K27Ac_peak_490	151	10	14	1	3	0.497116	0.703566	-0.115861
PotentialPeaks_H3K27Ac_peak_491	252	27	5	2	21	0.384015	-0.649933	-0.872325
PotentialPeaks_H3K27Ac_peak_492	270	14	22	6	15	0.0939893	0.435026	-0.35347
PotentialPeaks_H3K27Ac_peak_493	151	9	11	5	2	0.505174	0.616206	0.253636
PotentialPeaks_H3K27Ac_peak_494	408	45	33	17	12	1.24781	0.931784	0.361468
PotentialPeaks_H3K27Ac_peak_495	389	36	44	21	32	0.313971	0.520422	-0.177016
PotentialPeaks_H3K27Ac_peak_496	665	103	41	8	29	1.59438	0.532455	-0.715473
PotentialPeaks_H3K27Ac_peak_497	170	18	12	3	8	0.598336	0.318228	-0.241199
PotentialPeaks_H3K27Ac_peak_498	217	20	9	5	11	0.533063	0.00699432	-0.244544
PotentialPeaks_H3K27Ac_peak_499	202	13	16	2	7	0.421664	0.563683	-0.266392
PotentialPeaks_H3K27Ac_peak_500	151	11	8	2	9	0.214816	0.0448912	-0.370146
PotentialPeaks_H3K27Ac_peak_501	432	50	21	12	21	1.00214	0.167203	-0.234895
PotentialPeaks_H3K27Ac_peak_502	235	13	22	16	6	0.47648	0.866427	0.618499
PotentialPeaks_H3K27Ac_peak_503	157	7	12	2	10	-0.0657162	0.218077	-0.419353
PotentialPeaks_H3K27Ac_peak_504	300	23	22	7	13	0.557837	0.520363	-0.204003
PotentialPeaks_H3K27Ac_peak_505	715	68	159	67	41	0.774819	1.83371	0.757541
PotentialPeaks_H3K27Ac_peak_506	1004	123	222	66	48	1.34428	2.12016	0.582893
PotentialPeaks_H3K27Ac_peak_507	735	111	147	44	38	1.44416	1.8042	0.362367
PotentialPeaks_H3K27Ac_peak_508	933	199	262	101	50	1.93161	2.30235	1.05378
PotentialPeaks_H3K27Ac_peak_509	165	26	24	4	8	0.903191	0.832801	-0.167199
PotentialPeaks_H3K27Ac_peak_510	435	78	84	23	31	1.19623	1.2855	-0.0729551
PotentialPeaks_H3K27Ac_peak_511	555	147	185	36	38	1.8042	2.10653	0.155917
PotentialPeaks_H3K27Ac_peak_512	227	34	53	4	13	0.916291	1.38096	-0.405637
PotentialPeaks_H3K27Ac_peak_513	536	108	104	30	33	1.54015	1.49285	0.109519
PotentialPeaks_H3K27Ac_peak_514	151	17	16	1	13	0.316829	0.272435	-0.640102
PotentialPeaks_H3K27Ac_peak_515	151	11	36	5	17	-0.138583	0.806969	-0.501153
PotentialPeaks_H3K27Ac_peak_516	151	9	24	13	13	-0.0837088	0.594363	0.130416
PotentialPeaks_H3K27Ac_peak_517	555	98	51	22	36	1.33915	0.572351	-0.245811
PotentialPeaks_H3K27Ac_peak_518	1023	48	71	123	55	0.0836319	0.526575	1.20257
PotentialPeaks_H3K27Ac_peak_519	160	10	17	6	9	0.160368	0.504323	-0.0806397
PotentialPeaks_H3K27Ac_peak_520	449	12	28	43	29	-0.49308	0.158996	0.582208
PotentialPeaks_H3K27Ac_peak_521	426	22	61	17	8	0.758801	1.77766	0.555267
PotentialPeaks_H3K27Ac_peak_522	538	31	55	20	23	0.443333	1.03849	0.0586695
PotentialPeaks_H3K27Ac_peak_523	195	16	20	8	11	0.363138	0.533063	-0.0518994
PotentialPeaks_H3K27Ac_peak_524	247	6	10	15	6	0.0779309	0.318939	0.572696
PotentialPeaks_H3K27Ac_peak_525	301	23	28	13	21	0.243152	0.417182	-0.184269
PotentialPeaks_H3K27Ac_peak_526	622	23	124	44	32	-0.101067	1.74281	0.520422
PotentialPeaks_H3K27Ac_peak_527	265	14	67	12	15	0.0939893	1.56214	-0.00554634
PotentialPeaks_H3K27Ac_peak_528	167	4	23	11	12	-0.360998	0.602476	0.0719614
PotentialPeaks_H3K27Ac_peak_529	478	22	42	84	30	-0.0817595	0.528294	1.31417
PotentialPeaks_H3K27Ac_peak_530	655	74	240	45	36	0.998115	2.50626	0.436999
PotentialPeaks_H3K27Ac_peak_531	347	41	67	23	30	0.503203	1.04535	-0.0442848
PotentialPeaks_H3K27Ac_peak_532	339	46	85	14	22	0.877031	1.58105	-0.170275
PotentialPeaks_H3K27Ac_peak_533	156	10	30	11	8	0.211313	1.03444	0.265761
PotentialPeaks_H3K27Ac_peak_534	193	20	17	6	15	0.357024	0.231493	-0.35347
PotentialPeaks_H3K27Ac_peak_535	329	19	22	13	13	0.401718	0.520363	0.130416
PotentialPeaks_H3K27Ac_peak_536	403	20	36	17	19	0.200148	0.730662	0.0746168
PotentialPeaks_H3K27Ac_peak_537	180	10	22	5	3	0.497116	1.0446	0.188993
PotentialPeaks_H3K27Ac_peak_538	1673	282	433	253	63	2.15625	2.74765	2.00854
PotentialPeaks_H3K27Ac_peak_539	510	103	112	59	39	1.32556	1.43074	0.659558
PotentialPeaks_H3K27Ac_peak_540	193	18	13	3	13	0.359898	0.130416	-0.479637
PotentialPeaks_H3K27Ac_peak_541	749	38	64	55	33	0.340844	0.907885	0.735704
PotentialPeaks_H3K27Ac_peak_542	292	10	24	10	17	-0.193031	0.428458	-0.193031
PotentialPeaks_H3K27Ac_peak_543	971	82	280	31	32	1.22824	2.82298	0.16812
PotentialPeaks_H3K27Ac_peak_544	216	9	17	6	11	0.00699432	0.407532	-0.17743
PotentialPeaks_H3K27Ac_peak_545	360	21	51	8	11	0.572591	1.42923	-0.0518994
PotentialPeaks_H3K27Ac_peak_546	161	3	27	1	10	-0.341351	0.836987	-0.501815
PotentialPeaks_H3K27Ac_peak_547	154	4	27	0	6	-0.0595727	1.04476	-0.381501
PotentialPeaks_H3K27Ac_peak_548	314	21	26	11	17	0.315983	0.498847	-0.138583
PotentialPeaks_H3K27Ac_peak_549	757	70	72	30	42	0.785239	0.818406	-0.117463
PotentialPeaks_H3K27Ac_peak_550	187	10	11	10	8	0.211313	0.265761	0.211313
PotentialPeaks_H3K27Ac_peak_551	247	18	15	8	14	0.316599	0.183332	-0.185901
PotentialPeaks_H3K27Ac_peak_552	438	55	27	6	13	1.42218	0.6987	-0.268133
PotentialPeaks_H3K27Ac_peak_553	211	18	12	8	5	0.762944	0.482836	0.260443
PotentialPeaks_H3K27Ac_peak_554	816	53	58	58	26	0.89958	1.00051	1.00051
PotentialPeaks_H3K27Ac_peak_555	469	397	174	53	10	4.10072	2.98058	1.51925
PotentialPeaks_H3K27Ac_peak_556	204	20	24	9	13	0.44236	0.594363	-0.0837088
PotentialPeaks_H3K27Ac_peak_557	530	38	43	41	36	0.261149	0.388905	0.339152
PotentialPeaks_H3K27Ac_peak_558	890	66	66	115	45	0.648163	0.648163	1.32403
PotentialPeaks_H3K27Ac_peak_559	272	29	12	18	17	0.598383	-0.0861156	0.193992
PotentialPeaks_H3K27Ac_peak_560	195	17	27	16	7	0.608077	0.989948	0.563683
PotentialPeaks_H3K27Ac_peak_561	440	38	87	53	15	0.941986	1.8736	1.29562
PotentialPeaks_H3K27Ac_peak_562	877	170	215	182	27	2.29907	2.61166	2.38927
PotentialPeaks_H3K27Ac_peak_563	1538	391	318	607	57	2.71446	2.42928	3.32866
PotentialPeaks_H3K27Ac_peak_564	423	28	22	39	31	0.101074	-0.11043	0.423002
PotentialPeaks_H3K27Ac_peak_565	399	28	50	146	15	0.64653	1.23149	2.52695
PotentialPeaks_H3K27Ac_peak_566	976	68	57	386	34	0.951217	0.748724	3.20995
PotentialPeaks_H3K27Ac_peak_567	342	13	30	120	26	-0.350963	0.314618	1.87852
PotentialPeaks_H3K27Ac_peak_568	151	14	4	40	2	0.768209	0.183246	1.66867
PotentialPeaks_H3K27Ac_peak_569	273	18	22	80	16	0.233715	0.394179	1.73121
PotentialPeaks_H3K27Ac_peak_570	294	65	28	33	14	1.56899	0.688568	0.843846
PotentialPeaks_H3K27Ac_peak_571	382	24	22	40	15	0.509027	0.435026	0.994454
PotentialPeaks_H3K27Ac_peak_572	295	13	19	30	18	-0.0741474	0.197155	0.591434
PotentialPeaks_H3K27Ac_peak_573	538	172	152	115	26	2.34564	2.18337	1.82448
PotentialPeaks_H3K27Ac_peak_574	817	637	510	302	42	3.70991	3.39789	2.67186
PotentialPeaks_H3K27Ac_peak_575	237	18	15	7	22	0.0102975	-0.122969	-0.553603
PotentialPeaks_H3K27Ac_peak_576	308	28	17	19	8	0.970305	0.555267	0.640156
PotentialPeaks_H3K27Ac_peak_577	1431	140	61	147	41	1.6679	0.649288	1.73123
PotentialPeaks_H3K27Ac_peak_578	360	44	48	47	21	0.864641	0.95775	0.93503
PotentialPeaks_H3K27Ac_peak_579	294	38	53	44	16	0.901139	1.25478	1.05314
PotentialPeaks_H3K27Ac_peak_580	435	172	96	79	4	3.28939	2.54216	2.30466
PotentialPeaks_H3K27Ac_peak_581	538	261	302	174	25	2.93663	3.13577	2.39274
PotentialPeaks_H3K27Ac_peak_582	386	11	23	41	9	0.214816	0.745331	1.29282
PotentialPeaks_H3K27Ac_peak_583	469	20	25	49	31	-0.188432	-0.000805316	0.66401
PotentialPeaks_H3K27Ac_peak_584	510	57	48	73	17	1.29635	1.10653	1.58226
PotentialPeaks_H3K27Ac_peak_585	913	189	179	202	29	2.37904	2.30689	2.46775
PotentialPeaks_H3K27Ac_peak_586	293	18	15	9	12	0.404537	0.27127	-0.0390699
PotentialPeaks_H3K27Ac_peak_587	208	12	10	20	8	0.318228	0.211313	0.680798
PotentialPeaks_H3K27Ac_peak_588	1050	62	50	120	57	0.330977	0.089969	1.13304
PotentialPeaks_H3K27Ac_peak_589	151	7	12	14	6	0.142061	0.425854	0.52539
PotentialPeaks_H3K27Ac_peak_590	223	22	20	6	16	0.394179	0.316177	-0.394317
PotentialPeaks_H3K27Ac_peak_591	151	13	8	4	4	0.592787	0.319769	0.0567342
PotentialPeaks_H3K27Ac_peak_592	151	11	8	10	10	0.165609	-0.00431566	0.111162
PotentialPeaks_H3K27Ac_peak_593	186	13	14	4	5	0.533462	0.582372	-0.00259095
PotentialPeaks_H3K27Ac_peak_594	192	15	12	11	7	0.517879	0.371038	0.31857
PotentialPeaks_H3K27Ac_peak_595	153	10	11	4	6	0.318939	0.373387	-0.0595727
PotentialPeaks_H3K27Ac_peak_596	182	11	23	13	8	0.265761	0.796275	0.368854
PotentialPeaks_H3K27Ac_peak_597	381	23	30	21	18	0.353274	0.591434	0.277325
PotentialPeaks_H3K27Ac_peak_598	737	78	71	29	56	0.619067	0.507421	-0.443669
PotentialPeaks_H3K27Ac_peak_599	344	17	21	30	20	0.0379255	0.202985	0.517093
PotentialPeaks_H3K27Ac_peak_600	683	169	118	15	31	2.17302	1.70773	-0.404161
PotentialPeaks_H3K27Ac_peak_601	321	43	43	4	28	0.612065	0.612065	-0.94865
PotentialPeaks_H3K27Ac_peak_602	220	28	25	6	10	0.870153	0.768274	-0.129847
PotentialPeaks_H3K27Ac_peak_603	159	4	27	8	7	-0.114389	0.989948	0.148645
PotentialPeaks_H3K27Ac_peak_604	250	21	21	26	13	0.481888	0.481888	0.664752
PotentialPeaks_H3K27Ac_peak_605	229	14	21	8	11	0.270029	0.572591	-0.0518994
PotentialPeaks_H3K27Ac_peak_606	503	41	37	28	29	0.532455	0.427485	0.158996
PotentialPeaks_H3K27Ac_peak_607	226	25	15	13	17	0.464081	0.0607258	-0.0354895
PotentialPeaks_H3K27Ac_peak_608	550	50	46	30	41	0.426896	0.336698	-0.0939362
PotentialPeaks_H3K27Ac_peak_609	1458	445	261	331	30	3.51894	2.78406	3.1091
PotentialPeaks_H3K27Ac_peak_610	224	11	12	24	9	0.214816	0.267284	0.781857
PotentialPeaks_H3K27Ac_peak_611	243	9	10	21	9	0.103785	0.160368	0.669382
PotentialPeaks_H3K27Ac_peak_612	160	6	9	5	7	0.0231145	0.207539	-0.0439997
PotentialPeaks_H3K27Ac_peak_613	282	32	29	35	10	0.995684	0.902575	1.08315
PotentialPeaks_H3K27Ac_peak_614	250	13	14	13	8	0.368854	0.417764	0.368854
PotentialPeaks_H3K27Ac_peak_615	964	54	70	90	37	0.609929	0.906911	1.20857
PotentialPeaks_H3K27Ac_peak_616	954	136	128	118	25	2.07082	1.99281	1.88898
PotentialPeaks_H3K27Ac_peak_617	671	26	39	104	29	0.091882	0.480924	1.60646
PotentialPeaks_H3K27Ac_peak_618	157	1	13	12	7	-0.348854	0.421664	0.371038
PotentialPeaks_H3K27Ac_peak_619	186	9	17	10	4	0.378662	0.7792	0.435246
PotentialPeaks_H3K27Ac_peak_620	1287	217	464	551	37	2.34483	3.38754	3.62785
PotentialPeaks_H3K27Ac_peak_621	237	14	6	3	6	0.52539	0.0779309	-0.133573
PotentialPeaks_H3K27Ac_peak_622	172	17	20	4	11	0.407532	0.533063	-0.314934
PotentialPeaks_H3K27Ac_peak_623	457	26	49	43	23	0.281062	0.911112	0.771388
PotentialPeaks_H3K27Ac_peak_624	448	24	51	28	35	-0.145731	0.59843	-0.00822783
PotentialPeaks_H3K27Ac_peak_625	790	1252	874	333	14	5.53748	5.0268	3.67622
PotentialPeaks_H3K27Ac_peak_626	151	42	14	22	4	1.59279	0.641697	0.982734
PotentialPeaks_H3K27Ac_peak_627	183	11	9	11	4	0.489694	0.378662	0.489694
PotentialPeaks_H3K27Ac_peak_628	197	18	19	5	14	0.316599	0.358419	-0.378547
PotentialPeaks_H3K27Ac_peak_629	1014	128	124	93	49	1.37415	1.33351	0.972409
PotentialPeaks_H3K27Ac_peak_630	163	11	5	10	6	0.373387	0.0108167	0.318939
PotentialPeaks_H3K27Ac_peak_631	604	32	21	88	16	0.731214	0.355705	1.84669
PotentialPeaks_H3K27Ac_peak_632	151	4	10	7	13	-0.405637	-0.0271253	-0.204003
PotentialPeaks_H3K27Ac_peak_633	428	29	27	18	19	0.522076	0.456487	0.117686
PotentialPeaks_H3K27Ac_peak_634	847	428	448	307	12	4.11149	4.17505	3.65246
PotentialPeaks_H3K27Ac_peak_635	504	69	156	72	46	0.677916	1.69479	0.727957
PotentialPeaks_H3K27Ac_peak_636	693	51	40	52	35	0.59843	0.339695	0.619803
PotentialPeaks_H3K27Ac_peak_637	387	40	25	22	22	0.73019	0.280387	0.170762
PotentialPeaks_H3K27Ac_peak_638	316	18	13	18	19	0.117686	-0.111796	0.117686
PotentialPeaks_H3K27Ac_peak_639	155	6	4	13	2	0.32075	0.183246	0.719299
PotentialPeaks_H3K27Ac_peak_640	435	31	26	34	21	0.512339	0.350067	0.601606
PotentialPeaks_H3K27Ac_peak_641	151	6	9	5	7	0.0231145	0.207539	-0.0439997
PotentialPeaks_H3K27Ac_peak_642	279	10	34	13	32	-0.686029	0.257387	-0.528488
PotentialPeaks_H3K27Ac_peak_643	476	31	61	29	24	0.41003	1.12223	0.347294
PotentialPeaks_H3K27Ac_peak_644	179	7	16	12	4	0.258368	0.734806	0.542161
PotentialPeaks_H3K27Ac_peak_645	198	6	6	19	7	0.0231145	0.0231145	0.692966
PotentialPeaks_H3K27Ac_peak_646	677	34	116	16	17	0.750386	2.15092	0.106529
PotentialPeaks_H3K27Ac_peak_647	231	14	47	6	7	0.470573	1.54096	0.0231145
PotentialPeaks_H3K27Ac_peak_648	160	10	27	9	3	0.497116	1.22294	0.440532
PotentialPeaks_H3K27Ac_peak_649	327	33	34	8	8	1.12558	1.15473	0.0958357
PotentialPeaks_H3K27Ac_peak_650	549	60	55	26	26	1.03898	0.940803	0.183373
PotentialPeaks_H3K27Ac_peak_651	1235	182	277	280	34	2.18826	2.75366	2.76835
PotentialPeaks_H3K27Ac_peak_652	384	48	26	49	10	1.41072	0.803039	1.43309
PotentialPeaks_H3K27Ac_peak_653	313	14	12	35	12	0.223964	0.124429	0.989499
PotentialPeaks_H3K27Ac_peak_654	171	8	10	17	7	0.148645	0.264123	0.608077
PotentialPeaks_H3K27Ac_peak_655	292	7	8	28	18	-0.408566	-0.347166	0.527303
PotentialPeaks_H3K27Ac_peak_656	735	909	597	317	20	4.84684	4.25327	3.37291
PotentialPeaks_H3K27Ac_peak_657	908	464	263	256	83	2.53191	1.74914	1.71248
PotentialPeaks_H3K27Ac_peak_658	756	1099	905	312	15	5.30993	5.03416	3.54465
PotentialPeaks_H3K27Ac_peak_659	339	198	199	153	14	2.9706	2.97733	2.63002
PotentialPeaks_H3K27Ac_peak_660	678	93	43	53	26	1.55924	0.673699	0.89958
PotentialPeaks_H3K27Ac_peak_661	384	34	24	22	18	0.711728	0.3898	0.315799
PotentialPeaks_H3K27Ac_peak_662	156	11	6	13	3	0.551563	0.256107	0.654657
PotentialPeaks_H3K27Ac_peak_663	236	16	9	26	9	0.459929	0.103785	0.852246
PotentialPeaks_H3K27Ac_peak_664	177	12	3	16	14	0.0364909	-0.522936	0.229136
PotentialPeaks_H3K27Ac_peak_665	906	45	48	123	58	-0.0423464	0.0269163	1.14586
PotentialPeaks_H3K27Ac_peak_666	208	15	17	6	18	0.022068	0.112266	-0.472697
PotentialPeaks_H3K27Ac_peak_667	221	17	13	20	9	0.504323	0.31791	0.629854
PotentialPeaks_H3K27Ac_peak_668	151	7	2	16	3	0.320238	-0.0333991	0.796676
PotentialPeaks_H3K27Ac_peak_669	187	10	9	13	10	0.111162	0.054578	0.268703
PotentialPeaks_H3K27Ac_peak_670	430	9	49	41	15	-0.169045	1.20947	1.01999
PotentialPeaks_H3K27Ac_peak_671	165	6	6	8	4	0.194238	0.194238	0.319769
PotentialPeaks_H3K27Ac_peak_672	163	9	11	7	7	0.207539	0.31857	0.0872448
PotentialPeaks_H3K27Ac_peak_673	185	9	3	27	7	0.207539	-0.18839	0.989948
PotentialPeaks_H3K27Ac_peak_674	151	10	10	9	5	0.375921	0.375921	0.319337
PotentialPeaks_H3K27Ac_peak_675	242	10	12	23	17	-0.193031	-0.0861156	0.391932
PotentialPeaks_H3K27Ac_peak_676	372	13	26	43	12	0.175055	0.709391	1.19972
PotentialPeaks_H3K27Ac_peak_677	255	16	17	16	7	0.563683	0.608077	0.563683
PotentialPeaks_H3K27Ac_peak_678	183	8	18	9	10	-0.00431566	0.498185	0.054578
PotentialPeaks_H3K27Ac_peak_679	500	54	46	45	14	1.35842	1.18333	1.15987
PotentialPeaks_H3K27Ac_peak_680	336	18	13	34	23	-0.0237927	-0.253275	0.532601
PotentialPeaks_H3K27Ac_peak_681	1284	1110	846	558	45	4.4276	4.04216	3.45552
PotentialPeaks_H3K27Ac_peak_682	159	10	8	14	7	0.264123	0.148645	0.470573
PotentialPeaks_H3K27Ac_peak_683	152	14	7	3	5	0.582372	0.199043	-0.0765915
PotentialPeaks_H3K27Ac_peak_684	232	26	7	6	15	0.579416	-0.289339	-0.35347
PotentialPeaks_H3K27Ac_peak_685	310	41	10	11	8	1.34376	0.211313	0.265761
PotentialPeaks_H3K27Ac_peak_686	297	25	25	8	16	0.503804	0.503804	-0.268786
PotentialPeaks_H3K27Ac_peak_687	296	21	26	11	14	0.438589	0.621453	-0.0159765
PotentialPeaks_H3K27Ac_peak_688	242	10	16	16	19	-0.269338	0.0302227	0.0302227
PotentialPeaks_H3K27Ac_peak_689	215	10	47	4	13	-0.0271253	1.24971	-0.405637
PotentialPeaks_H3K27Ac_peak_690	151	9	32	8	4	0.378662	1.31977	0.319769
PotentialPeaks_H3K27Ac_peak_691	431	20	186	12	24	0.0253662	2.51365	-0.337204
PotentialPeaks_H3K27Ac_peak_692	249	14	65	7	12	0.223964	1.65692	-0.159364
PotentialPeaks_H3K27Ac_peak_693	188	6	37	6	8	-0.0296951	1.23879	-0.0296951
PotentialPeaks_H3K27Ac_peak_694	318	48	11	4	14	1.22914	-0.0159765	-0.448936
PotentialPeaks_H3K27Ac_peak_695	462	29	10	58	15	0.678952	-0.112462	1.39655
PotentialPeaks_H3K27Ac_peak_696	392	22	46	42	20	0.241459	0.947728	0.851512
PotentialPeaks_H3K27Ac_peak_697	275	17	27	29	16	0.190646	0.572516	0.638105
PotentialPeaks_H3K27Ac_peak_698	621	19	118	52	51	-0.70782	1.22899	0.25036
PotentialPeaks_H3K27Ac_peak_699	259	13	11	32	13	0.130416	0.0273225	0.857398
PotentialPeaks_H3K27Ac_peak_700	631	33	78	61	43	-0.049465	0.890414	0.602612
PotentialPeaks_H3K27Ac_peak_701	151	8	17	9	8	0.0958357	0.555267	0.154729
PotentialPeaks_H3K27Ac_peak_702	816	49	59	145	46	0.290893	0.497344	1.59944
PotentialPeaks_H3K27Ac_peak_703	234	8	8	33	10	-0.00431566	-0.00431566	1.02543
PotentialPeaks_H3K27Ac_peak_704	212	3	0	22	8	-0.241199	-0.489127	0.758801
PotentialPeaks_H3K27Ac_peak_705	183	6	5	19	17	-0.434039	-0.501153	0.235812
PotentialPeaks_H3K27Ac_peak_706	465	18	23	69	44	-0.599496	-0.401557	0.722432
PotentialPeaks_H3K27Ac_peak_707	648	46	50	39	27	0.714106	0.804304	0.541269
PotentialPeaks_H3K27Ac_peak_708	258	28	18	16	7	1.02311	0.651146	0.563683
PotentialPeaks_H3K27Ac_peak_709	258	14	17	26	6	0.52539	0.662893	1.01082
PotentialPeaks_H3K27Ac_peak_710	206	13	12	14	14	0.087117	0.0364909	0.136027
PotentialPeaks_H3K27Ac_peak_711	427	18	31	26	12	0.404537	0.871663	0.709391
PotentialPeaks_H3K27Ac_peak_712	161	11	19	1	10	0.165609	0.540005	-0.501815
PotentialPeaks_H3K27Ac_peak_713	159	7	8	7	4	0.258368	0.319769	0.258368
PotentialPeaks_H3K27Ac_peak_714	1449	65	571	877	82	-0.0210337	2.83633	3.44163
PotentialPeaks_H3K27Ac_peak_715	151	5	20	6	11	-0.244544	0.533063	-0.17743
PotentialPeaks_H3K27Ac_peak_716	199	8	17	9	10	-0.00431566	0.455116	0.054578
PotentialPeaks_H3K27Ac_peak_717	268	23	18	10	11	0.64854	0.450601	0.0635779
PotentialPeaks_H3K27Ac_peak_718	402	11	23	35	25	-0.422223	0.108292	0.495315
PotentialPeaks_H3K27Ac_peak_719	176	2	8	17	15	-0.642976	-0.227939	0.231493
PotentialPeaks_H3K27Ac_peak_720	341	7	20	55	22	-0.553603	0.0927597	1.07258
PotentialPeaks_H3K27Ac_peak_721	151	4	14	7	4	0.0567342	0.641697	0.258368
PotentialPeaks_H3K27Ac_peak_722	264	7	30	5	11	-0.1133	0.8867	-0.244544
PotentialPeaks_H3K27Ac_peak_723	267	13	19	28	11	0.221119	0.492421	0.82257
PotentialPeaks_H3K27Ac_peak_724	182	10	5	11	10	0.111162	-0.196961	0.165609
PotentialPeaks_H3K27Ac_peak_725	151	7	2	12	8	0.0344352	-0.319202	0.318228
PotentialPeaks_H3K27Ac_peak_726	243	6	19	17	16	-0.394317	0.275535	0.190646
PotentialPeaks_H3K27Ac_peak_727	255	19	15	13	6	0.747782	0.572696	0.47648
PotentialPeaks_H3K27Ac_peak_728	164	10	11	14	10	0.111162	0.165609	0.317612
PotentialPeaks_H3K27Ac_peak_729	286	16	7	29	9	0.459929	-0.0165094	0.951782
PotentialPeaks_H3K27Ac_peak_730	164	7	6	11	14	-0.247302	-0.311432	-0.0159765
PotentialPeaks_H3K27Ac_peak_731	1310	545	500	680	47	3.37863	3.258	3.68972
PotentialPeaks_H3K27Ac_peak_732	360	44	41	98	26	0.697946	0.623946	1.62395
PotentialPeaks_H3K27Ac_peak_733	152	5	10	17	16	-0.461431	-0.153309	0.190646
PotentialPeaks_H3K27Ac_peak_734	583	45	79	80	34	0.489637	1.12876	1.14386
PotentialPeaks_H3K27Ac_peak_735	238	22	34	12	17	0.354457	0.750386	-0.0861156
PotentialPeaks_H3K27Ac_peak_736	403	38	58	70	24	0.610329	1.06489	1.28171
PotentialPeaks_H3K27Ac_peak_737	247	4	6	30	13	-0.405637	-0.268133	0.795997
PotentialPeaks_H3K27Ac_peak_738	438	15	17	60	27	-0.285894	-0.195696	1.00784
PotentialPeaks_H3K27Ac_peak_739	448	60	24	18	15	1.43503	0.509027	0.274562
PotentialPeaks_H3K27Ac_peak_740	159	13	7	14	3	0.654657	0.320238	0.703566
PotentialPeaks_H3K27Ac_peak_741	219	17	16	13	18	0.112266	0.0678716	-0.0741474
PotentialPeaks_H3K27Ac_peak_742	220	14	25	3	9	0.366819	0.817481	-0.292144
PotentialPeaks_H3K27Ac_peak_743	151	14	7	5	6	0.52539	0.142061	0.0108167
PotentialPeaks_H3K27Ac_peak_744	218	4	10	19	12	-0.360998	0.0175136	0.446357
PotentialPeaks_H3K27Ac_peak_745	298	40	27	18	28	0.536777	0.155686	-0.183116
PotentialPeaks_H3K27Ac_peak_746	880	119	95	64	212	-0.471038	-0.753437	-1.22593
PotentialPeaks_H3K27Ac_peak_747	348	57	41	30	50	0.373238	0.016303	-0.293025
PotentialPeaks_H3K27Ac_peak_748	196	12	14	6	12	0.124429	0.223964	-0.223495
PotentialPeaks_H3K27Ac_peak_749	153	15	4	4	12	0.27127	-0.360998	-0.360998
PotentialPeaks_H3K27Ac_peak_750	330	57	15	1	15	1.37692	0.141295	-0.725438
PotentialPeaks_H3K27Ac_peak_751	158	18	10	2	7	0.651146	0.264123	-0.266392
PotentialPeaks_H3K27Ac_peak_752	331	11	15	33	16	-0.0988608	0.100448	0.760962
PotentialPeaks_H3K27Ac_peak_753	250	6	19	22	13	-0.268133	0.401718	0.520363
PotentialPeaks_H3K27Ac_peak_754	236	10	14	17	8	0.211313	0.417764	0.555267
PotentialPeaks_H3K27Ac_peak_755	321	9	22	9	15	-0.169045	0.435026	-0.169045
PotentialPeaks_H3K27Ac_peak_756	230	13	29	2	10	0.268703	0.902575	-0.419353
PotentialPeaks_H3K27Ac_peak_757	505	38	79	21	35	0.287228	1.1022	-0.258206
PotentialPeaks_H3K27Ac_peak_758	151	8	16	5	2	0.446281	0.861318	0.253636
PotentialPeaks_H3K27Ac_peak_759	195	7	42	4	12	-0.159364	1.17505	-0.360998
PotentialPeaks_H3K27Ac_peak_760	160	20	17	1	15	0.357024	0.231493	-0.725438
PotentialPeaks_H3K27Ac_peak_761	919	262	199	36	39	2.54968	2.17893	0.131179
PotentialPeaks_H3K27Ac_peak_762	421	19	50	12	41	-0.488215	0.426896	-0.810143
PotentialPeaks_H3K27Ac_peak_763	274	12	19	5	8	0.318228	0.640156	-0.0968093
PotentialPeaks_H3K27Ac_peak_764	258	9	28	4	14	-0.127008	0.688568	-0.448936
PotentialPeaks_H3K27Ac_peak_765	205	31	10	2	10	0.965311	0.111162	-0.419353
PotentialPeaks_H3K27Ac_peak_766	153	24	2	0	13	0.594363	-0.55764	-0.727565
PotentialPeaks_H3K27Ac_peak_767	645	38	74	46	41	0.137389	0.874355	0.336698
PotentialPeaks_H3K27Ac_peak_768	194	21	10	4	9	0.669382	0.160368	-0.218143
PotentialPeaks_H3K27Ac_peak_769	243	45	22	2	9	1.39067	0.707856	-0.370146
PotentialPeaks_H3K27Ac_peak_770	349	34	31	4	14	0.872992	0.783725	-0.448936
PotentialPeaks_H3K27Ac_peak_771	228	20	15	5	8	0.680798	0.46507	-0.0968093
PotentialPeaks_H3K27Ac_peak_772	166	2	5	17	8	-0.319202	-0.0968093	0.555267
PotentialPeaks_H3K27Ac_peak_773	309	11	16	10	14	-0.0159765	0.229136	-0.0704243
PotentialPeaks_H3K27Ac_peak_774	192	8	7	21	14	-0.185901	-0.247302	0.438589
PotentialPeaks_H3K27Ac_peak_775	264	6	11	24	12	-0.223495	0.0719614	0.639002
PotentialPeaks_H3K27Ac_peak_776	186	20	45	2	5	0.845406	1.60622	-0.154594
PotentialPeaks_H3K27Ac_peak_777	223	9	26	1	13	-0.0837088	0.664752	-0.640102
PotentialPeaks_H3K27Ac_peak_778	203	6	31	2	7	0.0231145	1.11827	-0.266392
PotentialPeaks_H3K27Ac_peak_779	199	11	25	2	9	0.214816	0.817481	-0.370146
PotentialPeaks_H3K27Ac_peak_780	328	8	33	15	19	-0.384815	0.644933	-0.015581
PotentialPeaks_H3K27Ac_peak_781	175	4	18	5	13	-0.405637	0.359898	-0.335248
PotentialPeaks_H3K27Ac_peak_782	190	9	10	11	9	0.103785	0.160368	0.214816
PotentialPeaks_H3K27Ac_peak_783	343	21	37	22	13	0.481888	1.00036	0.520363
PotentialPeaks_H3K27Ac_peak_784	247	9	6	30	13	-0.0837088	-0.268133	0.795997
PotentialPeaks_H3K27Ac_peak_785	156	16	9	5	7	0.563683	0.207539	-0.0439997
PotentialPeaks_H3K27Ac_peak_786	164	38	6	1	7	1.31857	0.0231145	-0.348854
PotentialPeaks_H3K27Ac_peak_787	368	142	12	6	27	2.06369	-0.432735	-0.780659
PotentialPeaks_H3K27Ac_peak_788	297	133	33	3	12	2.53624	0.931784	-0.434999
PotentialPeaks_H3K27Ac_peak_789	160	30	19	2	1	1.45256	1.05828	0.0989184
PotentialPeaks_H3K27Ac_peak_790	1010	405	55	21	52	2.86035	0.292416	-0.647878
PotentialPeaks_H3K27Ac_peak_791	277	14	31	5	14	0.136027	0.783725	-0.378547
PotentialPeaks_H3K27Ac_peak_792	202	26	19	1	9	0.852246	0.589212	-0.452609
PotentialPeaks_H3K27Ac_peak_793	437	45	27	13	20	0.924269	0.419796	-0.148488
PotentialPeaks_H3K27Ac_peak_794	996	103	82	73	31	1.53646	1.25635	1.11738
PotentialPeaks_H3K27Ac_peak_795	203	14	16	7	20	-0.0995781	-0.00646867	-0.482907
PotentialPeaks_H3K27Ac_peak_796	264	19	26	5	14	0.358419	0.621453	-0.378547
PotentialPeaks_H3K27Ac_peak_797	159	8	16	9	9	0.0448912	0.459929	0.103785
PotentialPeaks_H3K27Ac_peak_798	196	9	17	12	10	0.054578	0.455116	0.218077
PotentialPeaks_H3K27Ac_peak_799	151	12	7	6	12	0.124429	-0.159364	-0.223495
PotentialPeaks_H3K27Ac_peak_800	487	19	89	23	30	-0.200404	1.38456	-0.0442848
PotentialPeaks_H3K27Ac_peak_801	254	14	20	9	10	0.317612	0.580647	0.054578
PotentialPeaks_H3K27Ac_peak_802	238	21	37	6	7	0.773136	1.2916	0.0231145
PotentialPeaks_H3K27Ac_peak_803	151	16	7	14	8	0.510873	0.0344352	0.417764
PotentialPeaks_H3K27Ac_peak_804	193	21	16	7	13	0.481888	0.272435	-0.204003
PotentialPeaks_H3K27Ac_peak_805	356	49	32	21	22	0.945203	0.507797	0.132288
PotentialPeaks_H3K27Ac_peak_806	174	20	8	3	12	0.486999	-0.0979636	-0.434999
PotentialPeaks_H3K27Ac_peak_807	151	7	10	7	8	0.0344352	0.211313	0.0344352
PotentialPeaks_H3K27Ac_peak_808	184	17	10	15	11	0.407532	0.0635779	0.317334
PotentialPeaks_H3K27Ac_peak_809	243	7	19	22	9	-0.0165094	0.589212	0.707856
PotentialPeaks_H3K27Ac_peak_810	487	19	24	53	21	0.087033	0.279678	1.06627
PotentialPeaks_H3K27Ac_peak_811	251	21	13	13	14	0.438589	0.087117	0.087117
PotentialPeaks_H3K27Ac_peak_812	1518	2924	2097	1222	33	6.10756	5.63103	4.85975
PotentialPeaks_H3K27Ac_peak_813	709	2234	1378	926	10	6.54643	5.85574	5.29031
PotentialPeaks_H3K27Ac_peak_814	591	711	506	774	27	4.26572	3.78782	4.38562
PotentialPeaks_H3K27Ac_peak_815	211	62	77	110	17	1.39193	1.64569	2.08381
PotentialPeaks_H3K27Ac_peak_816	256	21	12	15	9	0.669382	0.267284	0.414125
PotentialPeaks_H3K27Ac_peak_817	598	34	29	51	18	0.711728	0.559725	1.13396
PotentialPeaks_H3K27Ac_peak_818	154	7	5	9	8	0.0344352	-0.0968093	0.154729
PotentialPeaks_H3K27Ac_peak_819	174	8	8	15	5	0.260443	0.260443	0.629677
PotentialPeaks_H3K27Ac_peak_820	528	30	29	41	26	0.314618	0.282909	0.623946
PotentialPeaks_H3K27Ac_peak_821	276	12	17	25	10	0.218077	0.455116	0.768274
PotentialPeaks_H3K27Ac_peak_822	330	20	19	34	11	0.533063	0.492421	1.00699
PotentialPeaks_H3K27Ac_peak_823	523	73	139	142	14	1.70487	2.50526	2.53292
PotentialPeaks_H3K27Ac_peak_824	155	5	4	25	6	0.0108167	-0.0595727	0.976051
PotentialPeaks_H3K27Ac_peak_825	349	3	12	57	19	-0.72185	-0.162422	1.22005
PotentialPeaks_H3K27Ac_peak_826	184	11	10	4	21	-0.287362	-0.34181	-0.720322
PotentialPeaks_H3K27Ac_peak_827	458	20	40	87	36	-0.323813	0.313617	1.19276
PotentialPeaks_H3K27Ac_peak_828	478	18	57	54	44	-0.599496	0.502866	0.442324
PotentialPeaks_H3K27Ac_peak_829	425	15	65	69	26	-0.254748	1.13091	1.20045
PotentialPeaks_H3K27Ac_peak_830	151	4	27	1	13	-0.405637	0.6987	-0.640102
PotentialPeaks_H3K27Ac_peak_831	354	23	29	27	20	0.278934	0.485384	0.419796
PotentialPeaks_H3K27Ac_peak_832	262	22	11	15	19	0.27815	-0.21489	-0.015581
PotentialPeaks_H3K27Ac_peak_833	156	13	8	5	2	0.719299	0.446281	0.253636
PotentialPeaks_H3K27Ac_peak_834	183	37	23	6	2	1.58924	1.14672	0.32075
PotentialPeaks_H3K27Ac_peak_835	524	56	28	20	24	1.02537	0.314873	0.0253662
PotentialPeaks_H3K27Ac_peak_836	170	5	8	13	4	0.127124	0.319769	0.592787
PotentialPeaks_H3K27Ac_peak_837	151	7	10	5	2	0.38488	0.561758	0.253636
PotentialPeaks_H3K27Ac_peak_838	169	15	12	5	10	0.364918	0.218077	-0.196961
PotentialPeaks_H3K27Ac_peak_839	304	28	26	21	20	0.452963	0.385849	0.202985
PotentialPeaks_H3K27Ac_peak_840	562	44	34	43	33	0.492847	0.229813	0.4686
PotentialPeaks_H3K27Ac_peak_841	183	11	8	11	4	0.489694	0.319769	0.489694
PotentialPeaks_H3K27Ac_peak_842	598	21	26	85	25	0.0323427	0.215207	1.4811
PotentialPeaks_H3K27Ac_peak_843	210	11	4	21	7	0.31857	-0.114389	0.773136
PotentialPeaks_H3K27Ac_peak_844	292	17	78	11	25	-0.132717	1.37748	-0.422223
PotentialPeaks_H3K27Ac_peak_845	978	53	175	51	51	0.271421	1.74033	0.228986
PotentialPeaks_H3K27Ac_peak_846	171	10	13	14	12	0.0175136	0.175055	0.223964
PotentialPeaks_H3K27Ac_peak_847	227	16	15	18	9	0.459929	0.414125	0.547391
PotentialPeaks_H3K27Ac_peak_848	1310	85	48	178	54	0.761255	0.103044	1.70296
PotentialPeaks_H3K27Ac_peak_849	266	24	31	7	22	0.244763	0.477424	-0.553603
PotentialPeaks_H3K27Ac_peak_850	1298	141	179	118	81	0.947976	1.26069	0.719444
PotentialPeaks_H3K27Ac_peak_851	198	26	22	4	7	0.956	0.81161	-0.114389
PotentialPeaks_H3K27Ac_peak_852	340	31	20	12	14	0.783725	0.399061	0.0364909
PotentialPeaks_H3K27Ac_peak_853	440	40	48	6	34	0.366255	0.5589	-0.981669
PotentialPeaks_H3K27Ac_peak_854	283	24	33	6	17	0.428458	0.721239	-0.434039
PotentialPeaks_H3K27Ac_peak_855	234	24	19	8	7	0.885611	0.692966	0.148645
PotentialPeaks_H3K27Ac_peak_856	244	30	8	7	22	0.446397	-0.492203	-0.553603
PotentialPeaks_H3K27Ac_peak_857	195	18	14	9	14	0.316599	0.136027	-0.127008
PotentialPeaks_H3K27Ac_peak_858	181	9	12	12	13	-0.0837088	0.07979	0.07979
PotentialPeaks_H3K27Ac_peak_859	504	19	32	53	18	0.197155	0.652834	1.1764
PotentialPeaks_H3K27Ac_peak_860	193	6	8	9	4	0.194238	0.319769	0.378662
PotentialPeaks_H3K27Ac_peak_861	863	52	90	102	39	0.518202	1.15866	1.31338
PotentialPeaks_H3K27Ac_peak_862	481	20	52	69	25	-0.00718562	0.910352	1.23228
PotentialPeaks_H3K27Ac_peak_863	151	7	7	4	11	-0.1133	-0.1133	-0.314934
PotentialPeaks_H3K27Ac_peak_864	272	19	8	24	12	0.446357	-0.0979636	0.639002
PotentialPeaks_H3K27Ac_peak_865	389	32	45	31	32	0.198494	0.544268	0.16812
PotentialPeaks_H3K27Ac_peak_866	240	13	13	18	8	0.368854	0.368854	0.598336
PotentialPeaks_H3K27Ac_peak_867	204	26	10	3	4	1.12712	0.435246	-0.0172663
PotentialPeaks_H3K27Ac_peak_868	418	19	13	75	29	-0.171152	-0.442454	1.20736
PotentialPeaks_H3K27Ac_peak_869	287	9	11	31	7	0.207539	0.31857	1.11827
PotentialPeaks_H3K27Ac_peak_870	168	23	15	6	10	0.696124	0.364918	-0.129847
PotentialPeaks_H3K27Ac_peak_871	223	17	14	10	9	0.504323	0.366819	0.160368
PotentialPeaks_H3K27Ac_peak_872	367	48	32	10	8	1.51087	1.09584	0.211313
PotentialPeaks_H3K27Ac_peak_873	466	78	83	8	23	1.44333	1.5181	-0.526293
PotentialPeaks_H3K27Ac_peak_874	496	72	35	13	21	1.41718	0.630175	-0.184269
PotentialPeaks_H3K27Ac_peak_875	437	20	15	61	16	0.316177	0.100448	1.41304
PotentialPeaks_H3K27Ac_peak_876	177	11	12	19	3	0.551563	0.604031	0.925959
PotentialPeaks_H3K27Ac_peak_877	369	25	17	26	8	0.868425	0.555267	0.903191
PotentialPeaks_H3K27Ac_peak_878	156	7	3	15	7	0.0872448	-0.18839	0.517879
PotentialPeaks_H3K27Ac_peak_879	1490	475	472	615	68	2.79209	2.78325	3.15401
PotentialPeaks_H3K27Ac_peak_880	956	1049	790	487	39	4.48738	4.08538	3.40515
PotentialPeaks_H3K27Ac_peak_881	1359	104	132	160	65	0.809546	1.11211	1.36209
PotentialPeaks_H3K27Ac_peak_882	815	634	323	219	11	4.70743	3.76828	3.23966
PotentialPeaks_H3K27Ac_peak_883	189	16	4	5	12	0.317074	-0.360998	-0.290609
PotentialPeaks_H3K27Ac_peak_884	1212	1955	1957	727	52	5.08738	5.08884	3.67989
PotentialPeaks_H3K27Ac_peak_885	1593	424	345	650	51	2.94426	2.65875	3.54228
PotentialPeaks_H3K27Ac_peak_886	179	15	16	9	5	0.629677	0.675481	0.319337
PotentialPeaks_H3K27Ac_peak_887	423	43	43	15	16	1.02889	1.02889	0.100448
PotentialPeaks_H3K27Ac_peak_888	587	62	70	28	42	0.644377	0.785239	-0.181594
PotentialPeaks_H3K27Ac_peak_889	159	9	12	14	8	0.154729	0.318228	0.417764
PotentialPeaks_H3K27Ac_peak_890	168	4	5	19	12	-0.360998	-0.290609	0.446357
PotentialPeaks_H3K27Ac_peak_891	165	7	12	11	4	0.258368	0.542161	0.489694
PotentialPeaks_H3K27Ac_peak_892	972	74	185	24	30	1.16217	2.32136	-0.00775893
PotentialPeaks_H3K27Ac_peak_893	320	23	98	3	16	0.431654	1.97914	-0.605821
PotentialPeaks_H3K27Ac_peak_894	327	25	82	8	15	0.544651	1.80181	-0.227939
PotentialPeaks_H3K27Ac_peak_895	151	10	26	4	8	0.211313	0.903191	-0.167199
PotentialPeaks_H3K27Ac_peak_896	394	29	52	17	19	0.522076	1.11769	0.0746168
PotentialPeaks_H3K27Ac_peak_897	168	12	19	5	6	0.425854	0.747782	0.0108167
PotentialPeaks_H3K27Ac_peak_898	1256	337	369	576	72	2.25178	2.37697	2.99771
PotentialPeaks_H3K27Ac_peak_899	1037	644	607	330	21	4.32407	4.24084	3.39238
PotentialPeaks_H3K27Ac_peak_900	677	59	50	40	30	0.899132	0.714707	0.477668
PotentialPeaks_H3K27Ac_peak_901	155	17	6	9	12	0.361468	-0.223495	-0.0390699
PotentialPeaks_H3K27Ac_peak_902	490	66	22	34	8	1.86843	0.758801	1.15473
PotentialPeaks_H3K27Ac_peak_903	272	26	16	7	4	1.12712	0.734806	0.258368
PotentialPeaks_H3K27Ac_peak_904	657	128	60	56	52	1.31259	0.390596	0.312594
PotentialPeaks_H3K27Ac_peak_905	173	19	19	20	5	0.804764	0.804764	0.845406
PotentialPeaks_H3K27Ac_peak_906	166	22	20	10	10	0.658649	0.580647	0.111162
PotentialPeaks_H3K27Ac_peak_907	449	61	66	28	27	1.0267	1.11746	0.219341
PotentialPeaks_H3K27Ac_peak_908	296	40	23	25	15	0.994454	0.472501	0.544651
PotentialPeaks_H3K27Ac_peak_909	1211	190	155	130	66	1.57225	1.3036	1.07557
PotentialPeaks_H3K27Ac_peak_910	241	19	14	22	4	0.864089	0.641697	0.982734
PotentialPeaks_H3K27Ac_peak_911	164	15	5	6	4	0.689002	0.127124	0.194238
PotentialPeaks_H3K27Ac_peak_912	298	17	27	16	15	0.231493	0.613363	0.187099
PotentialPeaks_H3K27Ac_peak_913	350	33	20	23	13	0.887145	0.44236	0.557837
PotentialPeaks_H3K27Ac_peak_914	640	151	136	107	35	1.91604	1.78027	1.47486
PotentialPeaks_H3K27Ac_peak_915	186	28	22	7	6	1.07793	0.866427	0.142061
PotentialPeaks_H3K27Ac_peak_916	707	190	111	89	28	2.41592	1.71811	1.44367
PotentialPeaks_H3K27Ac_peak_917	280	29	25	10	9	0.951782	0.817481	0.160368
PotentialPeaks_H3K27Ac_peak_918	656	93	36	49	19	1.79841	0.730662	1.05259
PotentialPeaks_H3K27Ac_peak_919	283	23	20	23	7	0.849085	0.733608	0.849085
PotentialPeaks_H3K27Ac_peak_920	192	23	9	11	11	0.64854	0.00699432	0.118026
PotentialPeaks_H3K27Ac_peak_921	306	11	11	37	14	-0.0159765	-0.0159765	0.957056
PotentialPeaks_H3K27Ac_peak_922	151	10	4	14	9	0.160368	-0.218143	0.366819
PotentialPeaks_H3K27Ac_peak_923	276	35	19	19	10	1.08315	0.540005	0.540005
PotentialPeaks_H3K27Ac_peak_924	763	97	88	102	34	1.37908	1.25934	1.44154
PotentialPeaks_H3K27Ac_peak_925	180	12	7	10	12	0.124429	-0.159364	0.0175136
PotentialPeaks_H3K27Ac_peak_926	419	42	50	23	16	1.00423	1.19065	0.431654
PotentialPeaks_H3K27Ac_peak_927	332	19	7	36	18	0.197155	-0.408566	0.768311
PotentialPeaks_H3K27Ac_peak_928	280	51	15	12	6	1.68459	0.572696	0.425854
PotentialPeaks_H3K27Ac_peak_929	856	215	121	26	36	2.35801	1.60429	-0.101421
PotentialPeaks_H3K27Ac_peak_930	310	100	71	13	8	2.36885	1.95382	0.368854
PotentialPeaks_H3K27Ac_peak_931	399	51	34	31	14	1.29523	0.872992	0.783725
PotentialPeaks_H3K27Ac_peak_932	269	40	30	13	4	1.54216	1.25837	0.592787
PotentialPeaks_H3K27Ac_peak_933	763	100	97	47	26	1.64904	1.61123	0.768336
PotentialPeaks_H3K27Ac_peak_934	179	12	9	10	8	0.318228	0.154729	0.211313
PotentialPeaks_H3K27Ac_peak_935	690	66	102	75	24	1.21299	1.73808	1.36324
PotentialPeaks_H3K27Ac_peak_936	538	57	50	61	11	1.55296	1.40753	1.62992
PotentialPeaks_H3K27Ac_peak_937	218	14	11	8	3	0.703566	0.551563	0.381638
PotentialPeaks_H3K27Ac_peak_938	159	13	12	10	8	0.368854	0.318228	0.211313
PotentialPeaks_H3K27Ac_peak_939	636	116	81	46	20	2.03793	1.59344	0.947728
PotentialPeaks_H3K27Ac_peak_940	271	19	27	3	7	0.692966	0.989948	-0.18839
PotentialPeaks_H3K27Ac_peak_941	206	6	25	3	14	-0.311432	0.586688	-0.522936
PotentialPeaks_H3K27Ac_peak_942	158	26	3	8	8	0.903191	-0.241199	0.0958357
PotentialPeaks_H3K27Ac_peak_943	251	38	11	12	1	1.68388	0.683881	0.736348
PotentialPeaks_H3K27Ac_peak_944	219	11	4	17	4	0.489694	0.0567342	0.7792
PotentialPeaks_H3K27Ac_peak_945	578	49	54	18	20	1.0159	1.12281	0.0809942
PotentialPeaks_H3K27Ac_peak_946	320	25	35	9	18	0.425424	0.740297	-0.288272
PotentialPeaks_H3K27Ac_peak_947	195	24	18	1	7	0.885611	0.651146	-0.348854
PotentialPeaks_H3K27Ac_peak_948	176	12	17	2	4	0.542161	0.7792	-0.0952689
PotentialPeaks_H3K27Ac_peak_949	780	334	311	342	51	2.61411	2.51604	2.64671
PotentialPeaks_H3K27Ac_peak_950	779	322	287	297	44	2.71392	2.55622	2.60306
PotentialPeaks_H3K27Ac_peak_951	375	88	81	81	15	1.88754	1.78701	1.78701
PotentialPeaks_H3K27Ac_peak_952	167	18	6	5	9	0.547391	-0.0806397	-0.147754
PotentialPeaks_H3K27Ac_peak_953	437	36	21	28	16	0.846691	0.355705	0.605683
PotentialPeaks_H3K27Ac_peak_954	220	33	14	7	1	1.5437	0.835884	0.452555
PotentialPeaks_H3K27Ac_peak_955	1412	56	251	579	49	0.37415	2.26492	3.42097
PotentialPeaks_H3K27Ac_peak_956	308	17	19	23	15	0.231493	0.316382	0.472501
PotentialPeaks_H3K27Ac_peak_957	325	21	41	143	7	0.773136	1.39657	2.87657
PotentialPeaks_H3K27Ac_peak_958	842	107	173	654	38	1.39799	2.01772	3.84349
PotentialPeaks_H3K27Ac_peak_959	786	147	186	645	26	2.13978	2.44927	4.15956
PotentialPeaks_H3K27Ac_peak_960	320	51	59	110	9	1.52602	1.68875	2.43721
PotentialPeaks_H3K27Ac_peak_961	1089	119	54	345	22	1.99965	1.05212	3.41869
PotentialPeaks_H3K27Ac_peak_962	335	16	9	77	8	0.510873	0.154729	2.05003
PotentialPeaks_H3K27Ac_peak_963	671	18	23	143	32	-0.299006	-0.101067	1.92641
PotentialPeaks_H3K27Ac_peak_964	209	4	9	42	13	-0.405637	-0.0837088	1.13042
PotentialPeaks_H3K27Ac_peak_965	835	23	31	405	34	-0.155698	0.113488	3.27658
PotentialPeaks_H3K27Ac_peak_966	647	17	20	359	15	0.231493	0.357024	3.73785
PotentialPeaks_H3K27Ac_peak_967	227	9	10	48	11	0.00699432	0.0635779	1.36314
PotentialPeaks_H3K27Ac_peak_968	251	18	12	30	11	0.450601	0.170493	0.8867
PotentialPeaks_H3K27Ac_peak_969	430	11	14	105	17	-0.138583	0.0134201	2.02539
PotentialPeaks_H3K27Ac_peak_970	317	7	13	32	13	-0.204003	0.130416	0.857398
PotentialPeaks_H3K27Ac_peak_971	252	9	9	30	14	-0.127008	-0.127008	0.752698
PotentialPeaks_H3K27Ac_peak_972	364	15	16	43	19	-0.015581	0.0302227	0.912866
PotentialPeaks_H3K27Ac_peak_973	151	10	4	15	4	0.435246	0.0567342	0.689002
PotentialPeaks_H3K27Ac_peak_974	210	10	9	11	8	0.211313	0.154729	0.265761
PotentialPeaks_H3K27Ac_peak_975	229	16	20	14	7	0.563683	0.733608	0.470573
PotentialPeaks_H3K27Ac_peak_976	202	17	13	26	15	0.231493	0.0450797	0.579416
PotentialPeaks_H3K27Ac_peak_977	1391	342	172	288	23	3.37256	2.44333	3.13667
PotentialPeaks_H3K27Ac_peak_978	462	16	23	44	19	0.0302227	0.315625	0.937113
PotentialPeaks_H3K27Ac_peak_979	221	10	8	21	12	0.0175136	-0.0979636	0.526527
PotentialPeaks_H3K27Ac_peak_980	336	16	29	30	12	0.317074	0.808927	0.840636
PotentialPeaks_H3K27Ac_peak_981	372	9	19	57	10	0.054578	0.540005	1.60055
PotentialPeaks_H3K27Ac_peak_982	357	19	10	54	12	0.446357	0.0175136	1.44636
PotentialPeaks_H3K27Ac_peak_983	1247	242	377	426	33	2.59718	3.20434	3.37386
PotentialPeaks_H3K27Ac_peak_984	171	15	8	14	6	0.572696	0.203462	0.52539
PotentialPeaks_H3K27Ac_peak_985	250	82	46	59	11	1.97785	1.31733	1.59196
PotentialPeaks_H3K27Ac_peak_986	1544	1961	1269	923	68	4.80161	4.18006	3.72749
PotentialPeaks_H3K27Ac_peak_987	780	312	299	313	28	3.08697	3.02863	3.09137
PotentialPeaks_H3K27Ac_peak_988	151	2	7	17	7	-0.266392	0.0872448	0.608077
PotentialPeaks_H3K27Ac_peak_989	160	7	13	15	8	0.0344352	0.368854	0.46507
PotentialPeaks_H3K27Ac_peak_990	214	5	2	31	5	0.0677984	-0.154594	1.23007
PotentialPeaks_H3K27Ac_peak_991	313	10	12	48	16	-0.153309	-0.0463933	1.14625
PotentialPeaks_H3K27Ac_peak_992	615	17	17	101	27	-0.195696	-0.195696	1.63027
PotentialPeaks_H3K27Ac_peak_993	1631	54	89	299	72	-0.0824629	0.5025	2.08746
PotentialPeaks_H3K27Ac_peak_994	482	23	28	87	21	0.243152	0.417182	1.64425
PotentialPeaks_H3K27Ac_peak_995	591	24	19	85	19	0.352151	0.159506	1.68843
PotentialPeaks_H3K27Ac_peak_996	610	22	49	55	18	0.315799	1.09024	1.21762
PotentialPeaks_H3K27Ac_peak_997	1208	74	122	225	57	0.537428	1.1541	1.95846
PotentialPeaks_H3K27Ac_peak_998	399	25	43	93	17	0.464081	0.989173	1.87471
PotentialPeaks_H3K27Ac_peak_999	211	21	27	5	7	0.773136	0.989948	-0.0439997
PotentialPeaks_H3K27Ac_peak_1000	390	20	32	15	6	0.788424	1.20346	0.572696
PotentialPeaks_H3K27Ac_peak_1001	329	11	33	21	8	0.265761	1.12558	0.720327
PotentialPeaks_H3K27Ac_peak_1002	313	20	47	26	15	0.357024	1.16438	0.579416
PotentialPeaks_H3K27Ac_peak_1003	204	8	12	10	2	0.446281	0.668673	0.561758
PotentialPeaks_H3K27Ac_peak_1004	307	19	16	26	12	0.446357	0.317074	0.709391
PotentialPeaks_H3K27Ac_peak_1005	213	5	9	16	8	-0.0968093	0.154729	0.510873
PotentialPeaks_H3K27Ac_peak_1006	151	8	7	15	6	0.203462	0.142061	0.572696
PotentialPeaks_H3K27Ac_peak_1007	187	4	9	22	6	-0.0595727	0.262355	0.866427
PotentialPeaks_H3K27Ac_peak_1008	480	40	25	31	11	1.17049	0.72069	0.917727
PotentialPeaks_H3K27Ac_peak_1009	421	21	24	52	20	0.202985	0.315459	1.08099
PotentialPeaks_H3K27Ac_peak_1010	328	32	27	27	14	0.814099	0.655401	0.655401
PotentialPeaks_H3K27Ac_peak_1011	225	40	28	14	3	1.60403	1.25611	0.703566
PotentialPeaks_H3K27Ac_peak_1012	226	31	30	7	12	0.871663	0.840636	-0.159364
PotentialPeaks_H3K27Ac_peak_1013	920	171	229	47	52	1.68956	2.07931	0.119949
PotentialPeaks_H3K27Ac_peak_1014	263	39	19	20	10	1.19208	0.540005	0.580647
PotentialPeaks_H3K27Ac_peak_1015	182	21	23	5	7	0.773136	0.849085	-0.0439997
PotentialPeaks_H3K27Ac_peak_1016	365	49	50	19	18	1.09024	1.11227	0.197155
PotentialPeaks_H3K27Ac_peak_1017	454	50	85	23	19	1.07462	1.68843	0.315625
PotentialPeaks_H3K27Ac_peak_1018	249	20	11	24	6	0.788424	0.373387	0.940427
PotentialPeaks_H3K27Ac_peak_1019	151	13	6	8	6	0.47648	0.0779309	0.203462
PotentialPeaks_H3K27Ac_peak_1020	403	20	33	41	9	0.629854	1.07464	1.29282
PotentialPeaks_H3K27Ac_peak_1021	161	13	10	6	5	0.533462	0.375921	0.134913
PotentialPeaks_H3K27Ac_peak_1022	151	6	11	7	6	0.0779309	0.373387	0.142061
PotentialPeaks_H3K27Ac_peak_1023	863	101	60	108	36	1.37663	0.754189	1.46046
PotentialPeaks_H3K27Ac_peak_1024	366	38	16	38	19	0.78511	0.0302227	0.78511
PotentialPeaks_H3K27Ac_peak_1025	206	13	11	18	3	0.654657	0.551563	0.884139
PotentialPeaks_H3K27Ac_peak_1026	213	5	11	21	2	0.253636	0.616206	1.07077
PotentialPeaks_H3K27Ac_peak_1027	211	14	5	24	8	0.417764	-0.0968093	0.832801
PotentialPeaks_H3K27Ac_peak_1028	316	13	10	43	12	0.175055	0.0175136	1.19972
PotentialPeaks_H3K27Ac_peak_1029	475	49	55	49	14	1.2515	1.37888	1.2515
PotentialPeaks_H3K27Ac_peak_1030	541	67	94	80	11	1.73818	2.1445	1.9481
PotentialPeaks_H3K27Ac_peak_1031	449	98	97	11	41	1.21539	1.20268	-0.862611
PotentialPeaks_H3K27Ac_peak_1032	276	54	61	6	14	1.35842	1.49592	-0.311432
PotentialPeaks_H3K27Ac_peak_1033	851	223	238	36	50	2.08428	2.1721	-0.116147
PotentialPeaks_H3K27Ac_peak_1034	327	74	28	14	17	1.59838	0.565961	0.0134201
PotentialPeaks_H3K27Ac_peak_1035	767	92	82	136	31	1.39653	1.25635	1.88957
PotentialPeaks_H3K27Ac_peak_1036	1274	213	115	176	88	1.39572	0.589937	1.14148
PotentialPeaks_H3K27Ac_peak_1037	583	33	32	89	25	0.437599	0.407852	1.53713
PotentialPeaks_H3K27Ac_peak_1038	425	17	21	49	14	0.27353	0.438589	1.2515
PotentialPeaks_H3K27Ac_peak_1039	313	11	8	34	8	0.265761	0.0958357	1.15473
PotentialPeaks_H3K27Ac_peak_1040	299	23	16	21	10	0.696124	0.410722	0.620175
PotentialPeaks_H3K27Ac_peak_1041	255	28	21	13	12	0.776505	0.526527	0.175055
PotentialPeaks_H3K27Ac_peak_1042	503	28	30	92	18	0.527303	0.591434	1.82276
PotentialPeaks_H3K27Ac_peak_1043	634	31	40	146	25	0.377478	0.630244	2.16274
PotentialPeaks_H3K27Ac_peak_1044	323	29	21	33	11	0.854991	0.572591	0.977848
PotentialPeaks_H3K27Ac_peak_1045	161	16	3	15	1	0.928993	0.176921	0.88319
PotentialPeaks_H3K27Ac_peak_1046	264	15	11	16	11	0.317334	0.118026	0.363138
PotentialPeaks_H3K27Ac_peak_1047	195	11	7	14	13	0.0273225	-0.204003	0.179326
PotentialPeaks_H3K27Ac_peak_1048	285	25	8	34	14	0.586688	-0.185901	0.872992
PotentialPeaks_H3K27Ac_peak_1049	291	23	17	30	8	0.796275	0.555267	1.03444
PotentialPeaks_H3K27Ac_peak_1050	172	11	11	8	10	0.165609	0.165609	-0.00431566
PotentialPeaks_H3K27Ac_peak_1051	207	15	9	9	12	0.27127	-0.0390699	-0.0390699
PotentialPeaks_H3K27Ac_peak_1052	585	112	30	24	34	1.5589	0.0824615	-0.119172
PotentialPeaks_H3K27Ac_peak_1053	352	51	13	17	16	1.21234	0.00423273	0.190646
PotentialPeaks_H3K27Ac_peak_1054	218	12	26	3	8	0.318228	0.903191	-0.241199
PotentialPeaks_H3K27Ac_peak_1055	554	54	81	24	23	1.01803	1.48866	0.210673
PotentialPeaks_H3K27Ac_peak_1056	497	43	31	34	20	0.876174	0.54812	0.637388
PotentialPeaks_H3K27Ac_peak_1057	162	2	5	21	3	-0.0333991	0.188993	1.00613
PotentialPeaks_H3K27Ac_peak_1058	262	21	17	9	4	0.94426	0.7792	0.378662
PotentialPeaks_H3K27Ac_peak_1059	210	26	9	7	11	0.755456	0.00699432	-0.1133
PotentialPeaks_H3K27Ac_peak_1060	805	290	156	32	32	2.87092	2.0398	0.198494
PotentialPeaks_H3K27Ac_peak_1061	324	91	31	13	14	1.9706	0.783725	0.087117
PotentialPeaks_H3K27Ac_peak_1062	326	59	29	19	15	1.41592	0.678952	0.316382
PotentialPeaks_H3K27Ac_peak_1063	151	16	11	8	10	0.410722	0.165609	-0.00431566
PotentialPeaks_H3K27Ac_peak_1064	184	25	12	6	9	0.817481	0.267284	-0.0806397
PotentialPeaks_H3K27Ac_peak_1065	179	13	9	9	3	0.654657	0.440532	0.440532
PotentialPeaks_H3K27Ac_peak_1066	151	14	19	5	9	0.366819	0.589212	-0.147754
PotentialPeaks_H3K27Ac_peak_1067	209	16	13	5	9	0.459929	0.31791	-0.147754
PotentialPeaks_H3K27Ac_peak_1068	254	23	13	13	2	1.14672	0.719299	0.719299
PotentialPeaks_H3K27Ac_peak_1069	245	17	14	15	14	0.27353	0.136027	0.183332
PotentialPeaks_H3K27Ac_peak_1070	163	11	12	13	6	0.373387	0.425854	0.47648
PotentialPeaks_H3K27Ac_peak_1071	197	11	14	24	4	0.489694	0.641697	1.05673
PotentialPeaks_H3K27Ac_peak_1072	181	20	10	27	10	0.580647	0.111162	0.836987
PotentialPeaks_H3K27Ac_peak_1073	205	17	15	26	13	0.316829	0.226631	0.664752
PotentialPeaks_H3K27Ac_peak_1074	170	15	23	13	10	0.364918	0.696124	0.268703
PotentialPeaks_H3K27Ac_peak_1075	438	64	39	25	28	1.05135	0.510781	0.0869736
PotentialPeaks_H3K27Ac_peak_1076	153	16	11	4	2	0.861318	0.616206	0.183246
PotentialPeaks_H3K27Ac_peak_1077	151	16	8	5	7	0.563683	0.148645	-0.0439997
PotentialPeaks_H3K27Ac_peak_1078	230	20	13	26	13	0.44236	0.130416	0.664752
PotentialPeaks_H3K27Ac_peak_1079	305	21	21	29	10	0.620175	0.620175	0.902575
PotentialPeaks_H3K27Ac_peak_1080	195	18	18	9	15	0.274562	0.274562	-0.169045
PotentialPeaks_H3K27Ac_peak_1081	283	13	19	27	12	0.175055	0.446357	0.743339
PotentialPeaks_H3K27Ac_peak_1082	564	136	87	117	17	2.35446	1.79303	2.16181
PotentialPeaks_H3K27Ac_peak_1083	1195	134	83	153	75	0.970691	0.371229	1.14275
PotentialPeaks_H3K27Ac_peak_1084	392	37	32	49	9	1.18785	1.04489	1.4823
PotentialPeaks_H3K27Ac_peak_1085	180	10	16	9	6	0.318939	0.618499	0.262355
PotentialPeaks_H3K27Ac_peak_1086	151	17	8	5	7	0.608077	0.148645	-0.0439997
PotentialPeaks_H3K27Ac_peak_1087	163	24	7	5	9	0.781857	-0.0165094	-0.147754
PotentialPeaks_H3K27Ac_peak_1088	339	31	32	48	6	1.17309	1.20346	1.6185
PotentialPeaks_H3K27Ac_peak_1089	622	75	65	26	20	1.50133	1.33338	0.385849
PotentialPeaks_H3K27Ac_peak_1090	425	56	36	7	19	1.20015	0.730662	-0.446215
PotentialPeaks_H3K27Ac_peak_1091	435	18	22	84	24	-0.057096	0.103369	1.4993
PotentialPeaks_H3K27Ac_peak_1092	191	11	8	29	11	0.118026	-0.0518994	0.854991
PotentialPeaks_H3K27Ac_peak_1093	151	9	7	15	2	0.505174	0.38488	0.815515
PotentialPeaks_H3K27Ac_peak_1094	341	37	23	30	15	0.915019	0.472501	0.710661
PotentialPeaks_H3K27Ac_peak_1095	528	58	33	59	22	1.13229	0.537545	1.15165
PotentialPeaks_H3K27Ac_peak_1096	161	9	9	13	8	0.154729	0.154729	0.368854
PotentialPeaks_H3K27Ac_peak_1097	768	99	95	68	31	1.48713	1.43606	1.03396
PotentialPeaks_H3K27Ac_peak_1098	277	45	34	9	4	1.66554	1.37866	0.378662
PotentialPeaks_H3K27Ac_peak_1099	255	48	37	11	10	1.41072	1.13864	0.165609
PotentialPeaks_H3K27Ac_peak_1100	337	34	34	21	10	1.05458	1.05458	0.620175
PotentialPeaks_H3K27Ac_peak_1101	368	40	32	17	18	0.875227	0.652834	0.112266
PotentialPeaks_H3K27Ac_peak_1102	279	41	15	7	11	1.19603	0.317334	-0.1133
PotentialPeaks_H3K27Ac_peak_1103	290	36	21	5	13	0.972875	0.481888	-0.335248
PotentialPeaks_H3K27Ac_peak_1104	151	29	16	9	9	0.951782	0.459929	0.103785
PotentialPeaks_H3K27Ac_peak_1105	2112	776	417	286	86	3.21288	2.34175	1.82193
PotentialPeaks_H3K27Ac_peak_1106	178	17	19	29	8	0.555267	0.640156	1.00273
PotentialPeaks_H3K27Ac_peak_1107	301	24	15	46	16	0.46818	0.100448	1.10045
PotentialPeaks_H3K27Ac_peak_1108	562	385	198	64	24	3.5029	2.59691	1.17737
PotentialPeaks_H3K27Ac_peak_1109	1047	542	251	100	59	3.13262	2.06919	0.866477
PotentialPeaks_H3K27Ac_peak_1110	719	40	40	76	13	1.07979	1.07979	1.796
PotentialPeaks_H3K27Ac_peak_1111	423	81	48	80	23	1.48866	0.888744	1.47371
PotentialPeaks_H3K27Ac_peak_1112	387	91	55	57	8	2.25234	1.66062	1.7007
PotentialPeaks_H3K27Ac_peak_1113	194	49	21	30	10	1.43309	0.620175	0.934284
PotentialPeaks_H3K27Ac_peak_1114	430	280	127	111	22	3.13229	2.08271	1.91152
PotentialPeaks_H3K27Ac_peak_1115	1196	1459	543	284	19	5.55672	4.15693	3.25904
PotentialPeaks_H3K27Ac_peak_1116	399	59	36	29	26	1.01987	0.491496	0.282909
PotentialPeaks_H3K27Ac_peak_1117	250	45	28	12	12	1.24781	0.776505	0.124429
PotentialPeaks_H3K27Ac_peak_1118	192	36	16	11	4	1.43525	0.734806	0.489694
PotentialPeaks_H3K27Ac_peak_1119	985	179	105	60	27	2.36724	1.67877	1.00784
PotentialPeaks_H3K27Ac_peak_1120	278	36	32	28	3	1.49712	1.38164	1.25611
PotentialPeaks_H3K27Ac_peak_1121	172	16	8	21	1	0.928993	0.513956	1.13845
PotentialPeaks_H3K27Ac_peak_1122	420	67	33	41	11	1.73818	0.977848	1.19603
PotentialPeaks_H3K27Ac_peak_1123	151	25	14	9	8	0.868425	0.417764	0.154729
PotentialPeaks_H3K27Ac_peak_1124	353	16	25	34	14	0.229136	0.586688	0.872992
PotentialPeaks_H3K27Ac_peak_1125	450	28	41	17	18	0.527303	0.900762	0.112266
PotentialPeaks_H3K27Ac_peak_1126	969	204	84	32	36	2.28762	1.15012	0.0912241
PotentialPeaks_H3K27Ac_peak_1127	249	25	16	14	12	0.674626	0.317074	0.223964
PotentialPeaks_H3K27Ac_peak_1128	164	16	4	3	10	0.410722	-0.26735	-0.341351
PotentialPeaks_H3K27Ac_peak_1129	197	8	5	15	10	-0.00431566	-0.196961	0.364918
PotentialPeaks_H3K27Ac_peak_1130	274	8	25	15	18	-0.347166	0.425424	0.022068
PotentialPeaks_H3K27Ac_peak_1131	737	480	463	202	25	3.77709	3.72677	2.59107
PotentialPeaks_H3K27Ac_peak_1132	191	17	19	5	9	0.504323	0.589212	-0.147754
PotentialPeaks_H3K27Ac_peak_1133	292	31	11	6	6	1.17309	0.373387	0.0779309
PotentialPeaks_H3K27Ac_peak_1134	705	67	40	63	28	1.10446	0.536777	1.0332
PotentialPeaks_H3K27Ac_peak_1135	299	26	21	28	4	1.12712	0.94426	1.19424
PotentialPeaks_H3K27Ac_peak_1136	504	81	93	67	25	1.4228	1.59107	1.19793
PotentialPeaks_H3K27Ac_peak_1137	351	16	9	46	9	0.459929	0.103785	1.41412
PotentialPeaks_H3K27Ac_peak_1138	778	1145	509	205	27	4.94106	3.79608	2.54781
PotentialPeaks_H3K27Ac_peak_1139	546	20	29	138	14	0.399061	0.720989	2.49592
PotentialPeaks_H3K27Ac_peak_1140	718	629	465	157	23	4.2219	3.79864	2.32337
PotentialPeaks_H3K27Ac_peak_1141	492	85	95	76	37	1.13886	1.27506	1.00421
PotentialPeaks_H3K27Ac_peak_1142	1211	429	239	190	42	3.15664	2.35333	2.04548
PotentialPeaks_H3K27Ac_peak_1143	159	40	8	28	8	1.31823	0.0958357	0.970305
PotentialPeaks_H3K27Ac_peak_1144	1202	1428	699	331	28	5.22528	4.21122	3.16821
PotentialPeaks_H3K27Ac_peak_1145	205	21	21	14	9	0.669382	0.669382	0.366819
PotentialPeaks_H3K27Ac_peak_1146	243	38	15	5	3	1.55156	0.750872	0.188993
PotentialPeaks_H3K27Ac_peak_1147	462	287	169	174	19	3.2734	2.5616	2.60008
PotentialPeaks_H3K27Ac_peak_1148	573	89	60	171	30	1.38456	0.91824	2.21721
PotentialPeaks_H3K27Ac_peak_1149	2367	5874	5740	2317	88	6.08057	6.04736	4.74448
PotentialPeaks_H3K27Ac_peak_1150	454	60	34	29	7	1.81161	1.20754	1.05554
PotentialPeaks_H3K27Ac_peak_1151	229	24	4	13	3	1.1186	0.118604	0.654657
PotentialPeaks_H3K27Ac_peak_1152	1413	435	298	584	54	2.92003	2.39766	3.33186
PotentialPeaks_H3K27Ac_peak_1153	151	13	9	9	0	0.857981	0.643856	0.643856
PotentialPeaks_H3K27Ac_peak_1154	694	90	47	70	30	1.39823	0.647593	1.09658
PotentialPeaks_H3K27Ac_peak_1155	262	28	22	24	7	1.02311	0.81161	0.885611
PotentialPeaks_H3K27Ac_peak_1156	747	76	43	80	23	1.41231	0.771388	1.47371
PotentialPeaks_H3K27Ac_peak_1157	259	43	28	45	16	1.02889	0.605683	1.07699
PotentialPeaks_H3K27Ac_peak_1158	205	14	11	24	10	0.317612	0.165609	0.73265
PotentialPeaks_H3K27Ac_peak_1159	193	11	14	13	12	0.0719614	0.223964	0.175055
PotentialPeaks_H3K27Ac_peak_1160	213	11	14	7	5	0.430368	0.582372	0.199043
PotentialPeaks_H3K27Ac_peak_1161	341	18	10	32	9	0.547391	0.160368	1.04489
PotentialPeaks_H3K27Ac_peak_1162	593	43	18	56	18	0.950515	0.155334	1.2378
PotentialPeaks_H3K27Ac_peak_1163	259	16	8	20	10	0.410722	-0.00431566	0.580647
PotentialPeaks_H3K27Ac_peak_1164	402	24	24	31	19	0.352151	0.352151	0.584812
PotentialPeaks_H3K27Ac_peak_1165	182	24	10	5	9	0.781857	0.160368	-0.147754
PotentialPeaks_H3K27Ac_peak_1166	716	102	20	21	26	1.6737	-0.0390191	0.000509234
PotentialPeaks_H3K27Ac_peak_1167	249	33	13	9	8	1.12558	0.368854	0.154729
PotentialPeaks_H3K27Ac_peak_1168	158	12	2	20	7	0.371038	-0.266392	0.733608
PotentialPeaks_H3K27Ac_peak_1169	1447	840	546	542	70	3.56149	2.95445	2.94415
PotentialPeaks_H3K27Ac_peak_1170	188	4	9	17	3	0.118604	0.440532	0.84107
PotentialPeaks_H3K27Ac_peak_1171	782	1123	775	457	30	4.82387	4.29785	3.55601
PotentialPeaks_H3K27Ac_peak_1172	266	35	41	64	21	0.630175	0.79064	1.27968
PotentialPeaks_H3K27Ac_peak_1173	702	35	74	167	21	0.630175	1.4496	2.47345
PotentialPeaks_H3K27Ac_peak_1174	602	19	37	117	30	-0.200404	0.398233	1.7256
PotentialPeaks_H3K27Ac_peak_1175	180	8	5	21	4	0.319769	0.127124	0.94426
PotentialPeaks_H3K27Ac_peak_1176	218	11	15	19	7	0.31857	0.517879	0.692966
PotentialPeaks_H3K27Ac_peak_1177	164	8	8	10	8	0.0958357	0.0958357	0.211313
PotentialPeaks_H3K27Ac_peak_1178	837	132	43	48	31	1.8511	0.524286	0.641643
PotentialPeaks_H3K27Ac_peak_1179	465	30	16	62	30	0.193875	-0.329687	0.955715
PotentialPeaks_H3K27Ac_peak_1180	602	32	36	60	25	0.407852	0.523329	1.07082
PotentialPeaks_H3K27Ac_peak_1181	541	43	34	18	16	1.02889	0.790108	0.233715
PotentialPeaks_H3K27Ac_peak_1182	194	10	7	13	10	0.111162	-0.0657162	0.268703
PotentialPeaks_H3K27Ac_peak_1183	151	23	2	8	15	0.472501	-0.642976	-0.227939
PotentialPeaks_H3K27Ac_peak_1184	171	8	9	6	0	0.584963	0.643856	0.459432
PotentialPeaks_H3K27Ac_peak_1185	377	22	15	27	11	0.611066	0.317334	0.789403
PotentialPeaks_H3K27Ac_peak_1186	151	13	7	7	3	0.654657	0.320238	0.320238
PotentialPeaks_H3K27Ac_peak_1187	156	10	7	14	4	0.435246	0.258368	0.641697
PotentialPeaks_H3K27Ac_peak_1188	174	16	8	19	2	0.861318	0.446281	0.990601
PotentialPeaks_H3K27Ac_peak_1189	259	31	17	19	16	0.700841	0.190646	0.275535
PotentialPeaks_H3K27Ac_peak_1190	467	67	43	25	15	1.56214	1.06974	0.544651
PotentialPeaks_H3K27Ac_peak_1191	1471	2580	2002	1364	52	5.48474	5.12138	4.57312
PotentialPeaks_H3K27Ac_peak_1192	597	21	5	101	38	-0.33507	-1.15221	1.32584
PotentialPeaks_H3K27Ac_peak_1193	306	35	23	9	14	0.901561	0.514538	-0.127008
PotentialPeaks_H3K27Ac_peak_1194	479	47	33	15	27	0.73719	0.374619	-0.285894
PotentialPeaks_H3K27Ac_peak_1195	185	13	7	15	6	0.47648	0.142061	0.572696
PotentialPeaks_H3K27Ac_peak_1196	241	13	3	26	15	0.0450797	-0.564974	0.579416
PotentialPeaks_H3K27Ac_peak_1197	174	10	11	7	4	0.435246	0.489694	0.258368
PotentialPeaks_H3K27Ac_peak_1198	394	32	60	21	21	0.542713	1.20568	0.167203
PotentialPeaks_H3K27Ac_peak_1199	603	50	58	38	39	0.475134	0.640193	0.185627
PotentialPeaks_H3K27Ac_peak_1200	273	17	34	12	14	0.27353	0.872992	0.0364909
PotentialPeaks_H3K27Ac_peak_1201	151	13	14	3	7	0.421664	0.470573	-0.18839
PotentialPeaks_H3K27Ac_peak_1202	709	72	50	44	23	1.34818	0.933139	0.795635
PotentialPeaks_H3K27Ac_peak_1203	197	27	13	5	9	0.886193	0.31791	-0.147754
PotentialPeaks_H3K27Ac_peak_1204	165	16	21	7	1	0.928993	1.13845	0.452555
PotentialPeaks_H3K27Ac_peak_1205	247	5	3	31	1	0.321311	0.176921	1.48358
PotentialPeaks_H3K27Ac_peak_1206	517	17	22	80	24	-0.100165	0.103369	1.4404
PotentialPeaks_H3K27Ac_peak_1207	151	14	5	9	9	0.366819	-0.147754	0.103785
PotentialPeaks_H3K27Ac_peak_1208	822	356	285	254	24	3.3946	3.08906	2.93226
PotentialPeaks_H3K27Ac_peak_1209	151	10	6	11	9	0.160368	-0.0806397	0.214816
PotentialPeaks_H3K27Ac_peak_1210	157	10	3	14	1	0.629433	0.176921	0.835884
PotentialPeaks_H3K27Ac_peak_1211	202	29	21	6	5	1.16733	0.884934	0.134913
PotentialPeaks_H3K27Ac_peak_1212	421	86	47	12	10	2.08315	1.388	0.218077
PotentialPeaks_H3K27Ac_peak_1213	377	52	48	14	11	1.4506	1.36314	0.270029
PotentialPeaks_H3K27Ac_peak_1214	152	6	10	11	6	0.0779309	0.318939	0.373387
PotentialPeaks_H3K27Ac_peak_1215	206	10	12	20	12	0.0175136	0.124429	0.486999
PotentialPeaks_H3K27Ac_peak_1216	1411	846	588	535	78	3.44848	2.93534	2.80284
PotentialPeaks_H3K27Ac_peak_1217	1089	40	36	179	58	-0.165729	-0.272644	1.63425
PotentialPeaks_H3K27Ac_peak_1218	432	20	12	53	21	0.127675	-0.234895	1.06627
PotentialPeaks_H3K27Ac_peak_1219	660	184	94	98	9	3.10378	2.24129	2.29282
PotentialPeaks_H3K27Ac_peak_1220	510	34	104	176	18	0.711728	1.97476	2.65283
PotentialPeaks_H3K27Ac_peak_1221	233	9	7	31	9	0.103785	-0.0165094	1.01452
PotentialPeaks_H3K27Ac_peak_1222	161	4	16	22	6	-0.0595727	0.618499	0.866427
PotentialPeaks_H3K27Ac_peak_1223	380	27	23	58	6	1.04476	0.903901	1.82795
PotentialPeaks_H3K27Ac_peak_1224	747	105	38	44	17	2.02539	0.861417	1.01342
PotentialPeaks_H3K27Ac_peak_1225	357	40	18	27	6	1.42585	0.705962	1.04476
PotentialPeaks_H3K27Ac_peak_1226	196	17	3	15	2	0.905712	0.109246	0.815515
PotentialPeaks_H3K27Ac_peak_1227	170	13	5	17	2	0.719299	0.253636	0.905712
PotentialPeaks_H3K27Ac_peak_1228	341	63	16	27	8	1.81465	0.510873	0.937138
PotentialPeaks_H3K27Ac_peak_1229	368	61	23	23	12	1.58386	0.602476	0.602476
PotentialPeaks_H3K27Ac_peak_1230	482	30	28	50	31	0.165205	0.101074	0.686037
PotentialPeaks_H3K27Ac_peak_1231	1393	941	699	550	78	3.59931	3.17873	2.84159
PotentialPeaks_H3K27Ac_peak_1232	1340	212	199	368	71	1.63694	1.55224	2.38901
PotentialPeaks_H3K27Ac_peak_1233	709	133	91	125	50	1.40258	0.92488	1.32296
PotentialPeaks_H3K27Ac_peak_1234	328	61	88	62	19	1.29701	1.73066	1.31562
PotentialPeaks_H3K27Ac_peak_1235	519	516	420	382	18	4.12315	3.83606	3.7045
PotentialPeaks_H3K27Ac_peak_1236	528	284	266	321	19	3.25904	3.16977	3.42683
PotentialPeaks_H3K27Ac_peak_1237	621	831	429	189	10	5.13694	4.20838	3.0902
PotentialPeaks_H3K27Ac_peak_1238	155	15	5	8	9	0.414125	-0.147754	0.0448912
PotentialPeaks_H3K27Ac_peak_1239	886	1891	1066	491	28	5.62651	4.80891	3.71526
PotentialPeaks_H3K27Ac_peak_1240	672	390	255	250	16	3.81159	3.2284	3.20153
PotentialPeaks_H3K27Ac_peak_1241	256	18	15	9	11	0.450601	0.317334	0.00699432
PotentialPeaks_H3K27Ac_peak_1242	227	16	16	17	3	0.796676	0.796676	0.84107
PotentialPeaks_H3K27Ac_peak_1243	240	17	18	11	5	0.719875	0.762944	0.430368
PotentialPeaks_H3K27Ac_peak_1244	287	10	18	22	4	0.435246	0.822269	0.982734
PotentialPeaks_H3K27Ac_peak_1245	201	20	10	9	10	0.580647	0.111162	0.054578
PotentialPeaks_H3K27Ac_peak_1246	474	16	53	54	20	-0.00646867	1.10206	1.12281
PotentialPeaks_H3K27Ac_peak_1247	370	19	73	26	31	-0.229074	1.11738	0.0339601
PotentialPeaks_H3K27Ac_peak_1248	511	42	120	45	24	0.713422	1.9429	0.786179
PotentialPeaks_H3K27Ac_peak_1249	515	19	183	25	46	-0.602192	1.90515	-0.373923
PotentialPeaks_H3K27Ac_peak_1250	161	6	30	8	8	-0.0296951	1.03444	0.0958357
PotentialPeaks_H3K27Ac_peak_1251	1084	105	147	215	48	1.1442	1.57407	2.07709
PotentialPeaks_H3K27Ac_peak_1252	869	87	146	239	37	1.16715	1.8205	2.475
PotentialPeaks_H3K27Ac_peak_1253	344	61	19	13	13	1.53922	0.401718	0.130416
PotentialPeaks_H3K27Ac_peak_1254	345	65	36	16	5	2.01533	1.37592	0.675481
PotentialPeaks_H3K27Ac_peak_1255	647	59	117	41	35	0.761159	1.58762	0.365231
PotentialPeaks_H3K27Ac_peak_1256	447	33	58	19	9	1.07464	1.66938	0.589212
PotentialPeaks_H3K27Ac_peak_1257	191	11	6	6	10	0.165609	-0.129847	-0.129847
PotentialPeaks_H3K27Ac_peak_1258	169	8	14	25	11	-0.0518994	0.270029	0.72069
PotentialPeaks_H3K27Ac_peak_1259	253	17	31	22	11	0.407532	0.917727	0.611066
PotentialPeaks_H3K27Ac_peak_1260	320	24	85	86	15	0.509027	1.84531	1.85952
PotentialPeaks_H3K27Ac_peak_1261	1507	119	523	316	83	0.701832	2.69916	2.00006
PotentialPeaks_H3K27Ac_peak_1262	281	26	28	55	8	0.903191	0.970305	1.66062
PotentialPeaks_H3K27Ac_peak_1263	389	24	42	64	28	0.0513497	0.587403	1.05135
PotentialPeaks_H3K27Ac_peak_1264	1260	59	194	238	60	0.219127	1.70455	1.97899
PotentialPeaks_H3K27Ac_peak_1265	209	10	17	15	13	-0.0271253	0.316829	0.226631
PotentialPeaks_H3K27Ac_peak_1266	216	11	10	16	8	0.265761	0.211313	0.510873
PotentialPeaks_H3K27Ac_peak_1267	187	7	14	16	9	-0.0165094	0.366819	0.459929
PotentialPeaks_H3K27Ac_peak_1268	174	8	5	20	8	0.0958357	-0.0968093	0.680798
PotentialPeaks_H3K27Ac_peak_1269	272	14	5	26	6	0.52539	0.0108167	1.01082
PotentialPeaks_H3K27Ac_peak_1270	153	9	10	14	5	0.319337	0.375921	0.582372
PotentialPeaks_H3K27Ac_peak_1271	158	9	9	8	6	0.262355	0.262355	0.203462
PotentialPeaks_H3K27Ac_peak_1272	155	9	12	14	8	0.154729	0.318228	0.417764
PotentialPeaks_H3K27Ac_peak_1273	545	36	52	55	18	0.768311	1.15533	1.21762
PotentialPeaks_H3K27Ac_peak_1274	304	9	4	45	7	0.207539	-0.114389	1.49442
PotentialPeaks_H3K27Ac_peak_1275	169	16	9	9	0	1	0.643856	0.643856
PotentialPeaks_H3K27Ac_peak_1276	544	41	31	52	37	0.313536	0.0352346	0.568109
PotentialPeaks_H3K27Ac_peak_1277	365	24	12	47	22	0.244763	-0.26981	0.900115
PotentialPeaks_H3K27Ac_peak_1278	174	8	14	9	6	0.203462	0.52539	0.262355
PotentialPeaks_H3K27Ac_peak_1279	712	129	131	157	30	1.85022	1.86999	2.10494
PotentialPeaks_H3K27Ac_peak_1280	168	12	20	21	6	0.425854	0.788424	0.827953
PotentialPeaks_H3K27Ac_peak_1281	179	20	14	18	4	0.904731	0.641697	0.822269
PotentialPeaks_H3K27Ac_peak_1282	358	38	37	38	21	0.712638	0.68567	0.712638
PotentialPeaks_H3K27Ac_peak_1283	896	173	101	101	46	1.83077	1.13889	1.13889
PotentialPeaks_H3K27Ac_peak_1284	387	85	41	10	27	1.41812	0.5928	-0.539651
PotentialPeaks_H3K27Ac_peak_1285	553	57	45	38	25	1.01271	0.753627	0.577777
PotentialPeaks_H3K27Ac_peak_1286	359	37	23	33	21	0.68567	0.243152	0.57246
PotentialPeaks_H3K27Ac_peak_1287	207	13	16	31	12	0.175055	0.317074	0.871663
PotentialPeaks_H3K27Ac_peak_1288	661	38	28	158	31	0.39653	0.101074	2.08459
PotentialPeaks_H3K27Ac_peak_1289	202	21	16	11	7	0.773136	0.563683	0.31857
PotentialPeaks_H3K27Ac_peak_1290	195	17	12	20	8	0.555267	0.318228	0.680798
PotentialPeaks_H3K27Ac_peak_1291	185	11	9	12	9	0.214816	0.103785	0.267284
PotentialPeaks_H3K27Ac_peak_1292	368	24	27	26	17	0.428458	0.532794	0.498847
PotentialPeaks_H3K27Ac_peak_1293	313	20	28	21	18	0.237797	0.527303	0.277325
PotentialPeaks_H3K27Ac_peak_1294	152	13	23	6	8	0.368854	0.796275	-0.0296951
PotentialPeaks_H3K27Ac_peak_1295	189	27	61	26	4	1.16107	2.00159	1.12712
PotentialPeaks_H3K27Ac_peak_1296	882	191	447	172	49	1.89771	3.05909	1.75881
PotentialPeaks_H3K27Ac_peak_1297	506	95	285	80	41	1.17692	2.61612	0.967464
PotentialPeaks_H3K27Ac_peak_1298	674	131	369	172	36	1.70593	3.09498	2.06085
PotentialPeaks_H3K27Ac_peak_1299	220	24	39	17	11	0.685066	1.1445	0.407532
PotentialPeaks_H3K27Ac_peak_1300	228	37	24	21	12	1.04499	0.639002	0.526527
PotentialPeaks_H3K27Ac_peak_1301	744	51	84	145	29	0.765654	1.34342	2.03048
PotentialPeaks_H3K27Ac_peak_1302	389	23	22	54	18	0.353274	0.315799	1.19715
PotentialPeaks_H3K27Ac_peak_1303	159	21	13	8	4	0.94426	0.592787	0.319769
PotentialPeaks_H3K27Ac_peak_1304	330	19	26	25	16	0.275535	0.538569	0.503804
PotentialPeaks_H3K27Ac_peak_1305	306	35	22	8	8	1.1833	0.758801	0.0958357
PotentialPeaks_H3K27Ac_peak_1306	328	37	30	7	8	1.23879	1.03444	0.0344352
PotentialPeaks_H3K27Ac_peak_1307	172	14	22	14	6	0.52539	0.866427	0.52539
PotentialPeaks_H3K27Ac_peak_1308	1500	202	196	106	65	1.67084	1.63058	0.833393
PotentialPeaks_H3K27Ac_peak_1309	637	52	64	38	23	0.976207	1.21067	0.643632
PotentialPeaks_H3K27Ac_peak_1310	332	29	45	15	13	0.764288	1.20317	0.226631
PotentialPeaks_H3K27Ac_peak_1311	151	4	29	10	3	0.118604	1.28853	0.497116
PotentialPeaks_H3K27Ac_peak_1312	358	29	56	25	22	0.414688	1.09276	0.280387
PotentialPeaks_H3K27Ac_peak_1313	559	53	160	99	35	0.640865	1.99177	1.37783
PotentialPeaks_H3K27Ac_peak_1314	967	107	285	269	44	1.25556	2.54666	2.46786
PotentialPeaks_H3K27Ac_peak_1315	155	8	17	8	2	0.446281	0.905712	0.446281
PotentialPeaks_H3K27Ac_peak_1316	709	44	71	57	49	0.111115	0.647168	0.394049
PotentialPeaks_H3K27Ac_peak_1317	341	15	47	46	13	0.226631	1.24971	1.22663
PotentialPeaks_H3K27Ac_peak_1318	195	16	28	12	9	0.459929	0.91936	0.267284
PotentialPeaks_H3K27Ac_peak_1319	235	17	40	32	5	0.719875	1.48284	1.26044
PotentialPeaks_H3K27Ac_peak_1320	226	15	46	20	29	-0.346239	0.653761	-0.13051
PotentialPeaks_H3K27Ac_peak_1321	199	15	42	36	12	0.27127	1.17505	1.01751
PotentialPeaks_H3K27Ac_peak_1322	1174	94	240	291	42	1.14033	2.35897	2.62107
PotentialPeaks_H3K27Ac_peak_1323	277	27	20	11	13	0.6987	0.44236	0.0273225
PotentialPeaks_H3K27Ac_peak_1324	198	11	10	11	10	0.165609	0.111162	0.165609
PotentialPeaks_H3K27Ac_peak_1325	364	60	83	40	16	1.39418	1.77561	0.953607
PotentialPeaks_H3K27Ac_peak_1326	264	55	60	26	9	1.60968	1.70786	0.852246
PotentialPeaks_H3K27Ac_peak_1327	817	208	325	120	37	2.288	2.89427	1.56811
PotentialPeaks_H3K27Ac_peak_1328	409	88	127	64	28	1.42986	1.88929	1.05135
PotentialPeaks_H3K27Ac_peak_1329	159	8	53	23	1	0.513956	2.03752	1.2144
PotentialPeaks_H3K27Ac_peak_1330	177	10	8	21	12	0.0175136	-0.0979636	0.526527
PotentialPeaks_H3K27Ac_peak_1331	178	6	11	19	9	-0.0806397	0.214816	0.589212
PotentialPeaks_H3K27Ac_peak_1332	196	10	15	12	11	0.0635779	0.317334	0.170493
PotentialPeaks_H3K27Ac_peak_1333	247	12	35	12	25	-0.369756	0.495315	-0.369756
PotentialPeaks_H3K27Ac_peak_1334	193	3	13	25	5	-0.0765915	0.533462	1.03303
PotentialPeaks_H3K27Ac_peak_1335	409	36	19	51	23	0.589184	0.0180275	0.954834
PotentialPeaks_H3K27Ac_peak_1336	181	13	11	16	13	0.130416	0.0273225	0.272435
PotentialPeaks_H3K27Ac_peak_1337	216	19	22	11	8	0.640156	0.758801	0.265761
PotentialPeaks_H3K27Ac_peak_1338	518	49	77	21	32	0.635899	1.15269	-0.177016
PotentialPeaks_H3K27Ac_peak_1339	198	21	11	11	16	0.355705	-0.0988608	-0.0988608
PotentialPeaks_H3K27Ac_peak_1340	953	899	819	439	20	4.83116	4.69916	3.82325
PotentialPeaks_H3K27Ac_peak_1341	633	649	608	307	30	4.04752	3.95572	3.0057
PotentialPeaks_H3K27Ac_peak_1342	177	22	5	11	8	0.758801	-0.0968093	0.265761
PotentialPeaks_H3K27Ac_peak_1343	306	28	20	13	17	0.565961	0.276454	-0.0354895
PotentialPeaks_H3K27Ac_peak_1344	235	15	9	10	7	0.517879	0.207539	0.264123
PotentialPeaks_H3K27Ac_peak_1345	414	15	36	29	17	0.0607258	0.806969	0.598383
PotentialPeaks_H3K27Ac_peak_1346	151	2	12	5	8	-0.319202	0.318228	-0.0968093
PotentialPeaks_H3K27Ac_peak_1347	220	7	15	16	8	0.0344352	0.46507	0.510873
PotentialPeaks_H3K27Ac_peak_1348	151	7	17	6	6	0.142061	0.662893	0.0779309
PotentialPeaks_H3K27Ac_peak_1349	837	51	54	82	45	0.356701	0.419894	0.905321
PotentialPeaks_H3K27Ac_peak_1350	170	1	1	26	12	-0.595463	-0.595463	0.709391
PotentialPeaks_H3K27Ac_peak_1351	227	17	10	16	5	0.719875	0.375921	0.675481
PotentialPeaks_H3K27Ac_peak_1352	207	9	12	20	11	0.00699432	0.170493	0.533063
PotentialPeaks_H3K27Ac_peak_1353	285	13	18	22	4	0.592787	0.822269	0.982734
PotentialPeaks_H3K27Ac_peak_1354	349	12	21	46	29	-0.49308	-0.090982	0.653761
PotentialPeaks_H3K27Ac_peak_1355	168	8	11	16	7	0.148645	0.31857	0.563683
PotentialPeaks_H3K27Ac_peak_1356	1182	202	148	171	86	1.35171	0.941078	1.13042
PotentialPeaks_H3K27Ac_peak_1357	631	55	75	27	29	0.849312	1.20736	0.125829
PotentialPeaks_H3K27Ac_peak_1358	202	13	19	6	5	0.533462	0.804764	0.134913
PotentialPeaks_H3K27Ac_peak_1359	638	118	254	26	39	1.49683	2.50756	-0.176943
PotentialPeaks_H3K27Ac_peak_1360	1194	203	349	48	40	2.18121	2.91817	0.406419
PotentialPeaks_H3K27Ac_peak_1361	151	34	33	5	6	1.26236	1.23321	0.0108167
PotentialPeaks_H3K27Ac_peak_1362	885	248	224	17	33	2.63035	2.49285	-0.369649
PotentialPeaks_H3K27Ac_peak_1363	908	149	153	18	40	1.77274	1.8073	-0.506118
PotentialPeaks_H3K27Ac_peak_1364	175	8	19	7	8	0.0958357	0.640156	0.0344352
PotentialPeaks_H3K27Ac_peak_1365	651	32	60	46	27	0.344872	1.00784	0.714106
PotentialPeaks_H3K27Ac_peak_1366	179	11	10	6	11	0.118026	0.0635779	-0.17743
PotentialPeaks_H3K27Ac_peak_1367	1338	537	557	620	23	3.99988	4.05114	4.20163
PotentialPeaks_H3K27Ac_peak_1368	247	21	18	33	19	0.239676	0.117686	0.644933
PotentialPeaks_H3K27Ac_peak_1369	999	176	160	388	53	1.70768	1.58215	2.78093
PotentialPeaks_H3K27Ac_peak_1370	290	32	34	51	20	0.578494	0.637388	1.05962
PotentialPeaks_H3K27Ac_peak_1371	348	58	46	52	16	1.35571	1.10045	1.23371
PotentialPeaks_H3K27Ac_peak_1372	406	11	10	58	29	-0.545548	-0.599996	0.909018
PotentialPeaks_H3K27Ac_peak_1373	377	15	10	69	16	0.100448	-0.153309	1.55564
PotentialPeaks_H3K27Ac_peak_1374	303	14	10	32	13	0.179326	-0.0271253	0.857398
PotentialPeaks_H3K27Ac_peak_1375	183	10	7	17	9	0.160368	-0.0165094	0.504323
PotentialPeaks_H3K27Ac_peak_1376	174	6	11	16	6	0.0779309	0.373387	0.618499
PotentialPeaks_H3K27Ac_peak_1377	385	39	38	70	9	1.24129	1.21482	1.88619
PotentialPeaks_H3K27Ac_peak_1378	967	266	350	436	34	2.69845	3.0746	3.37908
PotentialPeaks_H3K27Ac_peak_1379	168	5	9	26	10	-0.196961	0.054578	0.803039
PotentialPeaks_H3K27Ac_peak_1380	593	10	15	117	36	-0.793299	-0.539542	1.56154
PotentialPeaks_H3K27Ac_peak_1381	750	16	22	139	34	-0.4411	-0.193173	1.83502
PotentialPeaks_H3K27Ac_peak_1382	266	10	13	22	16	-0.153309	0.00423273	0.394179
PotentialPeaks_H3K27Ac_peak_1383	644	276	205	384	46	2.45835	2.05643	2.91238
PotentialPeaks_H3K27Ac_peak_1384	846	827	454	370	34	4.27829	3.43542	3.15136
PotentialPeaks_H3K27Ac_peak_1385	152	12	8	13	14	0.0364909	-0.185901	0.087117
PotentialPeaks_H3K27Ac_peak_1386	549	28	61	166	22	0.382266	1.18962	2.43063
PotentialPeaks_H3K27Ac_peak_1387	479	18	41	92	18	0.155334	0.900762	1.82276
PotentialPeaks_H3K27Ac_peak_1388	1161	110	57	121	39	1.40802	0.620564	1.52877
PotentialPeaks_H3K27Ac_peak_1389	354	26	22	15	17	0.498847	0.354457	0.0607258
PotentialPeaks_H3K27Ac_peak_1390	165	8	15	5	4	0.319769	0.689002	0.127124
PotentialPeaks_H3K27Ac_peak_1391	210	5	32	4	14	-0.378547	0.814099	-0.448936
PotentialPeaks_H3K27Ac_peak_1392	277	13	42	14	16	0.00423273	1.00423	0.0531423
PotentialPeaks_H3K27Ac_peak_1393	694	54	165	40	25	0.952172	2.32274	0.630244
PotentialPeaks_H3K27Ac_peak_1394	284	15	47	7	7	0.517879	1.54096	0.0872448
PotentialPeaks_H3K27Ac_peak_1395	202	4	3	26	5	-0.00259095	-0.0765915	1.0678
PotentialPeaks_H3K27Ac_peak_1396	1235	205	86	175	21	2.74565	1.63018	2.53518
PotentialPeaks_H3K27Ac_peak_1397	170	11	8	17	7	0.31857	0.148645	0.608077
PotentialPeaks_H3K27Ac_peak_1398	452	26	25	64	21	0.350067	0.315302	1.27968
PotentialPeaks_H3K27Ac_peak_1399	316	7	9	53	4	0.258368	0.378662	1.84333
PotentialPeaks_H3K27Ac_peak_1400	403	14	11	60	12	0.223964	0.0719614	1.565
PotentialPeaks_H3K27Ac_peak_1401	549	42	26	41	25	0.68087	0.215207	0.655779
PotentialPeaks_H3K27Ac_peak_1402	441	32	14	25	16	0.731214	0.0531423	0.503804
PotentialPeaks_H3K27Ac_peak_1403	284	22	13	11	4	0.982734	0.592787	0.489694
PotentialPeaks_H3K27Ac_peak_1404	314	25	19	15	20	0.351083	0.122814	-0.0522724
PotentialPeaks_H3K27Ac_peak_1405	154	10	4	12	8	0.211313	-0.167199	0.318228
PotentialPeaks_H3K27Ac_peak_1406	274	20	13	15	19	0.200148	-0.111796	-0.015581
PotentialPeaks_H3K27Ac_peak_1407	195	9	8	12	5	0.319337	0.260443	0.482836
PotentialPeaks_H3K27Ac_peak_1408	443	121	163	168	31	1.73967	2.12546	2.1652
PotentialPeaks_H3K27Ac_peak_1409	1027	1689	1055	533	39	5.1663	4.49548	3.5314
PotentialPeaks_H3K27Ac_peak_1410	219	8	3	36	10	-0.00431566	-0.341351	1.11116
PotentialPeaks_H3K27Ac_peak_1411	295	20	14	28	12	0.486999	0.223964	0.776505
PotentialPeaks_H3K27Ac_peak_1412	158	9	4	6	9	0.103785	-0.218143	-0.0806397
PotentialPeaks_H3K27Ac_peak_1413	191	18	8	9	7	0.651146	0.148645	0.207539
PotentialPeaks_H3K27Ac_peak_1414	193	13	3	7	3	0.654657	0.0446034	0.320238
PotentialPeaks_H3K27Ac_peak_1415	894	465	335	224	26	3.70095	3.24638	2.69795
PotentialPeaks_H3K27Ac_peak_1416	220	36	20	28	16	0.846691	0.316177	0.605683
PotentialPeaks_H3K27Ac_peak_1417	204	4	8	26	14	-0.448936	-0.185901	0.621453
PotentialPeaks_H3K27Ac_peak_1418	660	29	29	113	19	0.522076	0.522076	2.04145
PotentialPeaks_H3K27Ac_peak_1419	155	19	16	47	10	0.540005	0.410722	1.388
PotentialPeaks_H3K27Ac_peak_1420	791	1284	916	347	25	5.16719	4.68708	3.32672
PotentialPeaks_H3K27Ac_peak_1421	1617	264	274	152	83	1.7543	1.80493	1.01733
PotentialPeaks_H3K27Ac_peak_1422	277	17	26	15	15	0.231493	0.579416	0.141295
PotentialPeaks_H3K27Ac_peak_1423	251	24	20	17	9	0.781857	0.629854	0.504323
PotentialPeaks_H3K27Ac_peak_1424	970	1911	1095	551	20	5.90567	5.11117	4.14074
PotentialPeaks_H3K27Ac_peak_1425	192	69	41	31	4	2.1442	1.5677	1.28939
PotentialPeaks_H3K27Ac_peak_1426	166	11	8	10	3	0.551563	0.381638	0.497116
PotentialPeaks_H3K27Ac_peak_1427	230	10	13	17	14	-0.0704243	0.087117	0.27353
PotentialPeaks_H3K27Ac_peak_1428	260	23	23	11	10	0.696124	0.696124	0.165609
PotentialPeaks_H3K27Ac_peak_1429	559	26	39	121	23	0.281062	0.670104	1.98678
PotentialPeaks_H3K27Ac_peak_1430	731	133	134	158	16	2.36542	2.37507	2.5892
PotentialPeaks_H3K27Ac_peak_1431	196	23	19	17	4	1.02021	0.864089	0.7792
PotentialPeaks_H3K27Ac_peak_1432	151	0	11	9	9	-0.540071	0.214816	0.103785
PotentialPeaks_H3K27Ac_peak_1433	313	12	22	23	6	0.425854	0.866427	0.903901
PotentialPeaks_H3K27Ac_peak_1434	370	25	8	24	8	0.868425	0.0958357	0.832801
PotentialPeaks_H3K27Ac_peak_1435	204	33	1	4	3	1.41139	-0.115861	0.118604
PotentialPeaks_H3K27Ac_peak_1436	242	15	18	9	7	0.517879	0.651146	0.207539
PotentialPeaks_H3K27Ac_peak_1437	407	27	18	29	18	0.494136	0.155334	0.559725
PotentialPeaks_H3K27Ac_peak_1438	353	45	31	18	3	1.72741	1.35126	0.884139
PotentialPeaks_H3K27Ac_peak_1439	256	14	9	31	5	0.582372	0.319337	1.23007
PotentialPeaks_H3K27Ac_peak_1440	161	13	11	14	3	0.654657	0.551563	0.703566
PotentialPeaks_H3K27Ac_peak_1441	556	102	54	24	13	2.15508	1.40172	0.594363
PotentialPeaks_H3K27Ac_peak_1442	177	18	16	1	7	0.651146	0.563683	-0.348854
PotentialPeaks_H3K27Ac_peak_1443	620	84	119	36	32	1.25739	1.69035	0.313971
PotentialPeaks_H3K27Ac_peak_1444	1461	251	277	197	58	2.08761	2.22167	1.76163
PotentialPeaks_H3K27Ac_peak_1445	319	28	33	30	5	1.13491	1.29019	1.19904
PotentialPeaks_H3K27Ac_peak_1446	318	29	12	31	15	0.678952	-0.00554634	0.741688
PotentialPeaks_H3K27Ac_peak_1447	1244	95	91	109	78	0.491351	0.438402	0.662719
PotentialPeaks_H3K27Ac_peak_1448	159	17	12	13	0	1.04439	0.807355	0.857981
PotentialPeaks_H3K27Ac_peak_1449	841	52	60	169	45	0.378074	0.538539	1.82199
PotentialPeaks_H3K27Ac_peak_1450	547	30	25	109	26	0.314618	0.148608	1.75684
PotentialPeaks_H3K27Ac_peak_1451	892	128	73	138	42	1.5289	0.834708	1.62576
PotentialPeaks_H3K27Ac_peak_1452	151	6	8	23	5	0.134913	0.260443	0.960883
PotentialPeaks_H3K27Ac_peak_1453	410	27	35	71	22	0.349099	0.59526	1.36578
PotentialPeaks_H3K27Ac_peak_1454	391	18	12	82	17	0.193992	-0.0861156	1.72124
PotentialPeaks_H3K27Ac_peak_1455	254	13	6	35	7	0.421664	0.0231145	1.23611
PotentialPeaks_H3K27Ac_peak_1456	261	33	13	10	10	1.02543	0.268703	0.111162
PotentialPeaks_H3K27Ac_peak_1457	601	121	136	112	41	1.48053	1.63043	1.3825
PotentialPeaks_H3K27Ac_peak_1458	617	125	147	114	13	2.41199	2.62116	2.2948
PotentialPeaks_H3K27Ac_peak_1459	192	17	5	6	11	0.407532	-0.244544	-0.17743
PotentialPeaks_H3K27Ac_peak_1460	887	119	71	90	39	1.50756	0.873683	1.15866
PotentialPeaks_H3K27Ac_peak_1461	670	99	49	62	19	1.87571	1.05259	1.31562
PotentialPeaks_H3K27Ac_peak_1462	246	13	13	15	10	0.268703	0.268703	0.364918
PotentialPeaks_H3K27Ac_peak_1463	234	27	12	6	7	0.989948	0.371038	0.0231145
PotentialPeaks_H3K27Ac_peak_1464	702	867	1081	634	20	4.7798	5.09288	4.33783
PotentialPeaks_H3K27Ac_peak_1465	1467	2870	2356	1112	52	5.63752	5.35456	4.28222
PotentialPeaks_H3K27Ac_peak_1466	300	58	27	37	7	1.77314	0.989948	1.2916
PotentialPeaks_H3K27Ac_peak_1467	224	13	9	22	8	0.368854	0.154729	0.758801
PotentialPeaks_H3K27Ac_peak_1468	224	17	12	18	9	0.504323	0.267284	0.547391
PotentialPeaks_H3K27Ac_peak_1469	687	89	56	95	18	1.78212	1.2378	1.86229
PotentialPeaks_H3K27Ac_peak_1470	328	18	17	47	14	0.316599	0.27353	1.20642
PotentialPeaks_H3K27Ac_peak_1471	311	32	41	46	14	0.814099	1.06203	1.18333
PotentialPeaks_H3K27Ac_peak_1472	353	51	71	54	18	1.13396	1.51082	1.19715
PotentialPeaks_H3K27Ac_peak_1473	709	105	33	254	29	1.61843	0.314274	2.77638
PotentialPeaks_H3K27Ac_peak_1474	465	31	24	154	15	0.741688	0.509027	2.59649
PotentialPeaks_H3K27Ac_peak_1475	473	56	29	184	20	1.16346	0.485384	2.63739
PotentialPeaks_H3K27Ac_peak_1476	160	25	22	8	7	0.921235	0.81161	0.148645
PotentialPeaks_H3K27Ac_peak_1477	213	19	22	18	5	0.804764	0.923408	0.762944
PotentialPeaks_H3K27Ac_peak_1478	310	24	18	24	9	0.781857	0.547391	0.781857
PotentialPeaks_H3K27Ac_peak_1479	411	36	35	28	32	0.313971	0.285956	0.0729627
PotentialPeaks_H3K27Ac_peak_1480	181	14	15	8	14	0.136027	0.183332	-0.185901
PotentialPeaks_H3K27Ac_peak_1481	533	63	46	51	30	0.974094	0.624509	0.736402
PotentialPeaks_H3K27Ac_peak_1482	868	38	31	238	31	0.39653	0.196232	2.63033
PotentialPeaks_H3K27Ac_peak_1483	482	17	22	159	11	0.407532	0.611066	2.81435
PotentialPeaks_H3K27Ac_peak_1484	200	27	2	13	10	0.836987	-0.419353	0.268703
PotentialPeaks_H3K27Ac_peak_1485	362	19	14	36	9	0.589212	0.366819	1.16037
PotentialPeaks_H3K27Ac_peak_1486	172	9	10	5	1	0.57285	0.629433	0.321311
PotentialPeaks_H3K27Ac_peak_1487	161	13	9	11	8	0.368854	0.154729	0.265761
PotentialPeaks_H3K27Ac_peak_1488	218	24	14	12	5	0.997409	0.582372	0.482836
PotentialPeaks_H3K27Ac_peak_1489	572	37	34	41	33	0.313877	0.229813	0.418847
PotentialPeaks_H3K27Ac_peak_1490	151	10	6	12	6	0.318939	0.0779309	0.425854
PotentialPeaks_H3K27Ac_peak_1491	174	17	10	16	7	0.608077	0.264123	0.563683
PotentialPeaks_H3K27Ac_peak_1492	225	26	22	9	13	0.664752	0.520363	-0.0837088
PotentialPeaks_H3K27Ac_peak_1493	334	39	16	15	5	1.45684	0.675481	0.629677
PotentialPeaks_H3K27Ac_peak_1494	319	15	10	25	8	0.46507	0.211313	0.868425
PotentialPeaks_H3K27Ac_peak_1495	396	36	48	14	21	0.65819	0.95775	-0.135359
PotentialPeaks_H3K27Ac_peak_1496	593	80	102	36	29	1.28453	1.58221	0.400004
PotentialPeaks_H3K27Ac_peak_1497	354	56	45	18	15	1.35702	1.11784	0.274562
PotentialPeaks_H3K27Ac_peak_1498	228	6	6	26	9	-0.0806397	-0.0806397	0.852246
PotentialPeaks_H3K27Ac_peak_1499	357	49	14	20	3	1.81904	0.703566	0.966601
PotentialPeaks_H3K27Ac_peak_1500	509	62	24	24	5	1.96088	0.997409	0.997409
PotentialPeaks_H3K27Ac_peak_1501	343	14	12	55	12	0.223964	0.124429	1.46682
PotentialPeaks_H3K27Ac_peak_1502	181	10	12	10	13	-0.0271253	0.07979	-0.0271253
PotentialPeaks_H3K27Ac_peak_1503	325	18	24	36	17	0.193992	0.428458	0.806969
PotentialPeaks_H3K27Ac_peak_1504	960	96	102	156	61	0.779701	0.854989	1.39861
PotentialPeaks_H3K27Ac_peak_1505	560	17	19	74	31	-0.313963	-0.229074	1.1335
PotentialPeaks_H3K27Ac_peak_1506	524	61	56	39	26	1.05784	0.960981	0.572416
PotentialPeaks_H3K27Ac_peak_1507	374	41	25	10	12	1.14996	0.674626	0.0175136
PotentialPeaks_H3K27Ac_peak_1508	369	27	24	19	7	0.989948	0.885611	0.692966
PotentialPeaks_H3K27Ac_peak_1509	243	13	11	19	15	0.0450797	-0.0580138	0.316382
PotentialPeaks_H3K27Ac_peak_1510	168	3	16	11	18	-0.684201	0.0678716	-0.177241
PotentialPeaks_H3K27Ac_peak_1511	199	10	11	10	4	0.435246	0.489694	0.435246
PotentialPeaks_H3K27Ac_peak_1512	151	11	3	13	5	0.430368	-0.0765915	0.533462
PotentialPeaks_H3K27Ac_peak_1513	186	10	6	23	7	0.264123	0.0231145	0.849085
PotentialPeaks_H3K27Ac_peak_1514	151	6	14	6	7	0.0231145	0.470573	0.0231145
PotentialPeaks_H3K27Ac_peak_1515	187	16	8	6	9	0.459929	0.0448912	-0.0806397
PotentialPeaks_H3K27Ac_peak_1516	331	17	28	39	8	0.555267	0.970305	1.29223
PotentialPeaks_H3K27Ac_peak_1517	710	70	73	24	40	0.832684	0.882152	-0.271653
PotentialPeaks_H3K27Ac_peak_1518	250	37	21	15	15	0.915019	0.396552	0.141295
PotentialPeaks_H3K27Ac_peak_1519	558	64	75	18	28	1.05135	1.23722	-0.183116
PotentialPeaks_H3K27Ac_peak_1520	154	14	16	7	5	0.582372	0.675481	0.199043
PotentialPeaks_H3K27Ac_peak_1521	633	129	180	78	58	1.20683	1.64163	0.581505
PotentialPeaks_H3K27Ac_peak_1522	495	141	129	57	42	1.6536	1.53888	0.548799
PotentialPeaks_H3K27Ac_peak_1523	334	54	125	14	10	1.54	2.55027	0.317612
PotentialPeaks_H3K27Ac_peak_1524	321	69	149	20	15	1.59649	2.55342	0.357024
PotentialPeaks_H3K27Ac_peak_1525	449	121	102	49	11	2.46117	2.24578	1.38551
PotentialPeaks_H3K27Ac_peak_1526	155	29	24	15	2	1.35317	1.18325	0.815515
PotentialPeaks_H3K27Ac_peak_1527	269	26	14	10	9	0.852246	0.366819	0.160368
PotentialPeaks_H3K27Ac_peak_1528	190	11	6	10	14	-0.0159765	-0.311432	-0.0704243
PotentialPeaks_H3K27Ac_peak_1529	276	15	33	7	7	0.517879	1.17839	0.0872448
PotentialPeaks_H3K27Ac_peak_1530	186	22	15	3	10	0.658649	0.364918	-0.341351
PotentialPeaks_H3K27Ac_peak_1531	276	15	31	8	15	0.141295	0.741688	-0.227939
PotentialPeaks_H3K27Ac_peak_1532	216	9	22	7	21	-0.398394	0.205678	-0.518688
PotentialPeaks_H3K27Ac_peak_1533	187	12	23	2	7	0.371038	0.849085	-0.266392
PotentialPeaks_H3K27Ac_peak_1534	151	9	16	4	6	0.262355	0.618499	-0.0595727
PotentialPeaks_H3K27Ac_peak_1535	179	29	30	5	4	1.22666	1.25837	0.127124
PotentialPeaks_H3K27Ac_peak_1536	781	177	247	30	26	2.38351	2.82997	0.314618
PotentialPeaks_H3K27Ac_peak_1537	195	33	46	5	26	0.405766	0.745252	-0.816627
PotentialPeaks_H3K27Ac_peak_1538	768	199	151	28	34	2.30709	1.9426	0.0183312
PotentialPeaks_H3K27Ac_peak_1539	266	56	40	4	5	1.84541	1.48284	-0.00259095
PotentialPeaks_H3K27Ac_peak_1540	158	16	13	2	11	0.363138	0.221119	-0.466937
PotentialPeaks_H3K27Ac_peak_1541	157	18	12	6	7	0.651146	0.371038	0.0231145
PotentialPeaks_H3K27Ac_peak_1542	392	56	38	10	14	1.39906	0.984024	-0.0704243
PotentialPeaks_H3K27Ac_peak_1543	387	33	39	15	16	0.760962	0.927611	0.100448
PotentialPeaks_H3K27Ac_peak_1544	188	25	27	3	7	0.921235	0.989948	-0.18839
PotentialPeaks_H3K27Ac_peak_1545	262	30	29	17	16	0.669814	0.638105	0.190646
PotentialPeaks_H3K27Ac_peak_1546	325	66	58	20	16	1.5038	1.35571	0.316177
PotentialPeaks_H3K27Ac_peak_1547	292	67	44	22	11	1.73818	1.27003	0.611066
PotentialPeaks_H3K27Ac_peak_1548	477	105	91	29	16	2.06511	1.88772	0.638105
PotentialPeaks_H3K27Ac_peak_1549	262	39	22	5	16	0.927611	0.394179	-0.461431
PotentialPeaks_H3K27Ac_peak_1550	519	98	33	13	25	1.65578	0.437599	-0.31913
PotentialPeaks_H3K27Ac_peak_1551	214	25	17	5	17	0.464081	0.150924	-0.501153
PotentialPeaks_H3K27Ac_peak_1552	308	30	18	10	6	1.14206	0.705962	0.318939
PotentialPeaks_H3K27Ac_peak_1553	161	10	10	10	6	0.318939	0.318939	0.318939
PotentialPeaks_H3K27Ac_peak_1554	464	38	36	58	21	0.712638	0.65819	1.1672
PotentialPeaks_H3K27Ac_peak_1555	246	32	22	27	10	0.995684	0.658649	0.836987
PotentialPeaks_H3K27Ac_peak_1556	375	25	32	70	17	0.464081	0.691492	1.53279
PotentialPeaks_H3K27Ac_peak_1557	1392	1058	833	259	102	3.44917	3.11001	1.48368
PotentialPeaks_H3K27Ac_peak_1558	151	29	38	62	10	0.902575	1.16561	1.69612
PotentialPeaks_H3K27Ac_peak_1559	658	729	639	166	47	3.78787	3.60212	1.75457
PotentialPeaks_H3K27Ac_peak_1560	203	122	117	21	10	2.51925	2.466	0.620175
PotentialPeaks_H3K27Ac_peak_1561	205	16	18	4	5	0.675481	0.762944	-0.00259095
PotentialPeaks_H3K27Ac_peak_1562	310	18	24	13	21	0.0452129	0.279678	-0.184269
PotentialPeaks_H3K27Ac_peak_1563	164	11	6	8	7	0.31857	0.0231145	0.148645
PotentialPeaks_H3K27Ac_peak_1564	163	9	8	11	10	0.054578	-0.00431566	0.165609
PotentialPeaks_H3K27Ac_peak_1565	272	20	15	11	24	0.0253662	-0.190363	-0.389671
PotentialPeaks_H3K27Ac_peak_1566	151	11	10	0	5	0.430368	0.375921	-0.324519
PotentialPeaks_H3K27Ac_peak_1567	394	40	25	18	11	1.17049	0.72069	0.450601
PotentialPeaks_H3K27Ac_peak_1568	196	11	10	11	9	0.214816	0.160368	0.214816
PotentialPeaks_H3K27Ac_peak_1569	168	18	18	6	12	0.404537	0.404537	-0.223495
PotentialPeaks_H3K27Ac_peak_1570	188	17	5	7	9	0.504323	-0.147754	-0.0165094
PotentialPeaks_H3K27Ac_peak_1571	156	20	2	3	1	1.09892	0.0989184	0.176921
PotentialPeaks_H3K27Ac_peak_1572	732	89	34	46	34	1.27315	0.202756	0.513096
PotentialPeaks_H3K27Ac_peak_1573	685	80	41	64	43	0.920788	0.168715	0.657753
PotentialPeaks_H3K27Ac_peak_1574	165	14	15	12	3	0.703566	0.750872	0.604031
PotentialPeaks_H3K27Ac_peak_1575	329	38	17	7	9	1.21482	0.504323	-0.0165094
PotentialPeaks_H3K27Ac_peak_1576	151	6	8	8	7	0.0231145	0.148645	0.148645
PotentialPeaks_H3K27Ac_peak_1577	548	92	99	75	35	1.28723	1.37783	1.04014
PotentialPeaks_H3K27Ac_peak_1578	1081	170	233	212	59	1.54765	1.9685	1.84139
PotentialPeaks_H3K27Ac_peak_1579	305	16	48	39	14	0.229136	1.22914	1.0105
PotentialPeaks_H3K27Ac_peak_1580	299	12	56	21	19	-0.162422	1.20015	0.239676
PotentialPeaks_H3K27Ac_peak_1581	1445	113	86	172	123	0.162174	-0.176628	0.705536
PotentialPeaks_H3K27Ac_peak_1582	264	14	25	26	22	-0.170275	0.280387	0.315152
PotentialPeaks_H3K27Ac_peak_1583	151	12	7	5	9	0.267284	-0.0165094	-0.147754
PotentialPeaks_H3K27Ac_peak_1584	208	48	24	7	9	1.45993	0.781857	-0.0165094
PotentialPeaks_H3K27Ac_peak_1585	713	272	139	50	24	3.02537	2.13157	0.899835
PotentialPeaks_H3K27Ac_peak_1586	645	249	161	71	34	2.60875	2.02651	1.00184
PotentialPeaks_H3K27Ac_peak_1587	514	136	54	35	33	1.83388	0.71524	0.258382
PotentialPeaks_H3K27Ac_peak_1588	152	7	23	2	6	0.142061	0.903901	-0.211576
PotentialPeaks_H3K27Ac_peak_1589	154	16	15	4	7	0.563683	0.517879	-0.114389
PotentialPeaks_H3K27Ac_peak_1590	163	15	13	3	8	0.46507	0.368854	-0.241199
PotentialPeaks_H3K27Ac_peak_1591	166	16	13	2	11	0.363138	0.221119	-0.466937
PotentialPeaks_H3K27Ac_peak_1592	153	8	15	6	11	-0.0518994	0.317334	-0.17743
PotentialPeaks_H3K27Ac_peak_1593	1071	146	317	102	74	1.09702	2.13655	0.639811
PotentialPeaks_H3K27Ac_peak_1594	348	29	154	21	41	-0.125645	1.79189	-0.408045
PotentialPeaks_H3K27Ac_peak_1595	233	18	11	9	8	0.598336	0.265761	0.154729
PotentialPeaks_H3K27Ac_peak_1596	367	48	37	19	19	1.03022	0.758143	0.159506
PotentialPeaks_H3K27Ac_peak_1597	312	47	17	23	15	1.16438	0.231493	0.472501
PotentialPeaks_H3K27Ac_peak_1598	185	30	22	9	11	0.8867	0.611066	0.00699432
PotentialPeaks_H3K27Ac_peak_1599	151	23	8	6	5	0.960883	0.260443	0.134913
PotentialPeaks_H3K27Ac_peak_1600	298	32	27	12	17	0.691492	0.532794	-0.0861156
PotentialPeaks_H3K27Ac_peak_1601	695	128	70	26	13	2.44236	1.6987	0.664752
PotentialPeaks_H3K27Ac_peak_1602	241	14	14	11	18	-0.0252378	-0.0252378	-0.177241
PotentialPeaks_H3K27Ac_peak_1603	250	9	10	14	17	-0.249614	-0.193031	0.0134201
PotentialPeaks_H3K27Ac_peak_1604	154	19	11	5	6	0.747782	0.373387	0.0108167
PotentialPeaks_H3K27Ac_peak_1605	314	15	45	8	14	0.183332	1.15987	-0.185901
PotentialPeaks_H3K27Ac_peak_1606	270	13	33	4	7	0.421664	1.17839	-0.114389
PotentialPeaks_H3K27Ac_peak_1607	209	11	20	3	5	0.430368	0.845406	-0.0765915
PotentialPeaks_H3K27Ac_peak_1608	194	14	19	14	12	0.223964	0.446357	0.223964
PotentialPeaks_H3K27Ac_peak_1609	385	128	126	7	17	2.27645	2.25628	-0.369909
PotentialPeaks_H3K27Ac_peak_1610	504	207	189	12	47	2.04767	1.92625	-0.945873
PotentialPeaks_H3K27Ac_peak_1611	336	77	107	11	12	1.85623	2.25959	0.0719614
PotentialPeaks_H3K27Ac_peak_1612	943	250	242	23	49	2.25951	2.21545	-0.510373
PotentialPeaks_H3K27Ac_peak_1613	212	30	13	7	8	1.03444	0.368854	0.0344352
PotentialPeaks_H3K27Ac_peak_1614	169	24	16	5	12	0.639002	0.317074	-0.290609
PotentialPeaks_H3K27Ac_peak_1615	175	13	11	5	6	0.47648	0.373387	0.0108167
PotentialPeaks_H3K27Ac_peak_1616	155	14	9	7	3	0.703566	0.440532	0.320238
PotentialPeaks_H3K27Ac_peak_1617	334	39	54	9	12	1.09843	1.44636	-0.0390699
PotentialPeaks_H3K27Ac_peak_1618	265	28	26	5	15	0.64653	0.579416	-0.420584
PotentialPeaks_H3K27Ac_peak_1619	1961	559	623	116	81	2.82077	2.97303	0.697749
PotentialPeaks_H3K27Ac_peak_1620	496	137	114	16	18	2.32526	2.09024	0.0678716
PotentialPeaks_H3K27Ac_peak_1621	746	73	169	41	36	0.981995	2.03764	0.339152
PotentialPeaks_H3K27Ac_peak_1622	175	13	45	13	7	0.421664	1.49442	0.421664
PotentialPeaks_H3K27Ac_peak_1623	297	22	50	19	22	0.170762	0.967229	0.0521177
PotentialPeaks_H3K27Ac_peak_1624	453	62	141	37	29	0.984967	1.99419	0.427485
PotentialPeaks_H3K27Ac_peak_1625	209	13	18	7	7	0.421664	0.651146	0.0872448
PotentialPeaks_H3K27Ac_peak_1626	246	29	24	5	13	0.764288	0.594363	-0.335248
PotentialPeaks_H3K27Ac_peak_1627	161	12	9	9	5	0.482836	0.319337	0.319337
PotentialPeaks_H3K27Ac_peak_1628	267	18	33	12	9	0.547391	1.07464	0.267284
PotentialPeaks_H3K27Ac_peak_1629	259	18	34	17	11	0.450601	1.00699	0.407532
PotentialPeaks_H3K27Ac_peak_1630	276	22	38	11	16	0.394179	0.901139	-0.0988608
PotentialPeaks_H3K27Ac_peak_1631	247	24	21	15	9	0.781857	0.669382	0.414125
PotentialPeaks_H3K27Ac_peak_1632	191	18	12	4	7	0.651146	0.371038	-0.114389
PotentialPeaks_H3K27Ac_peak_1633	281	24	13	16	9	0.781857	0.31791	0.459929
PotentialPeaks_H3K27Ac_peak_1634	154	9	14	13	9	0.103785	0.366819	0.31791
PotentialPeaks_H3K27Ac_peak_1635	208	16	12	10	8	0.510873	0.318228	0.211313
PotentialPeaks_H3K27Ac_peak_1636	859	108	194	34	32	1.56773	2.32778	0.257387
PotentialPeaks_H3K27Ac_peak_1637	166	13	28	7	7	0.421664	1.02311	0.0872448
PotentialPeaks_H3K27Ac_peak_1638	228	24	39	5	3	1.1186	1.57804	0.188993
PotentialPeaks_H3K27Ac_peak_1639	307	25	36	13	11	0.72069	1.06358	0.221119
PotentialPeaks_H3K27Ac_peak_1640	210	28	19	3	7	1.02311	0.692966	-0.18839
PotentialPeaks_H3K27Ac_peak_1641	311	13	18	8	17	-0.0354895	0.193992	-0.308508
PotentialPeaks_H3K27Ac_peak_1642	1037	109	315	120	71	0.769836	2.17474	0.891515
PotentialPeaks_H3K27Ac_peak_1643	704	82	189	49	43	0.950535	2.01531	0.358193
PotentialPeaks_H3K27Ac_peak_1644	1418	1029	568	82	47	4.27606	3.4366	0.861481
PotentialPeaks_H3K27Ac_peak_1645	389	25	19	14	17	0.464081	0.235812	0.0134201
PotentialPeaks_H3K27Ac_peak_1646	200	13	13	13	10	0.268703	0.268703	0.268703
PotentialPeaks_H3K27Ac_peak_1647	197	19	10	11	8	0.640156	0.211313	0.265761
PotentialPeaks_H3K27Ac_peak_1648	263	17	15	53	17	0.150924	0.0607258	1.21505
PotentialPeaks_H3K27Ac_peak_1649	1799	233	231	357	88	1.51652	1.50488	2.09955
PotentialPeaks_H3K27Ac_peak_1650	235	25	33	19	11	0.72069	0.977848	0.492421
PotentialPeaks_H3K27Ac_peak_1651	188	32	27	17	5	1.26044	1.10175	0.719875
PotentialPeaks_H3K27Ac_peak_1652	152	9	3	6	6	0.262355	-0.133573	0.0779309
PotentialPeaks_H3K27Ac_peak_1653	934	249	295	169	48	2.27519	2.50611	1.75672
PotentialPeaks_H3K27Ac_peak_1654	985	404	290	200	47	2.96102	2.50416	2.00166
PotentialPeaks_H3K27Ac_peak_1655	510	38	41	22	37	0.235533	0.313536	-0.271427
PotentialPeaks_H3K27Ac_peak_1656	498	35	33	34	24	0.527867	0.470151	0.499297
PotentialPeaks_H3K27Ac_peak_1657	207	21	17	13	2	1.07077	0.905712	0.719299
PotentialPeaks_H3K27Ac_peak_1658	152	7	15	8	5	0.199043	0.629677	0.260443
PotentialPeaks_H3K27Ac_peak_1659	151	14	7	11	4	0.641697	0.258368	0.489694
PotentialPeaks_H3K27Ac_peak_1660	389	289	266	112	17	3.35919	3.24608	2.10653
PotentialPeaks_H3K27Ac_peak_1661	1568	1369	1653	883	71	4.23972	4.50882	3.61623
PotentialPeaks_H3K27Ac_peak_1662	313	371	504	103	20	3.58972	4.0159	1.88835
PotentialPeaks_H3K27Ac_peak_1663	213	202	238	109	14	2.99732	3.21782	2.19492
PotentialPeaks_H3K27Ac_peak_1664	321	396	401	272	16	3.83275	3.85016	3.31618
PotentialPeaks_H3K27Ac_peak_1665	945	1803	1832	817	26	5.61999	5.6428	4.49323
PotentialPeaks_H3K27Ac_peak_1666	181	161	107	65	6	3.0861	2.56101	1.95835
PotentialPeaks_H3K27Ac_peak_1667	363	832	705	201	8	5.23879	5.00473	3.27242
PotentialPeaks_H3K27Ac_peak_1668	1504	2334	2188	764	31	5.84009	5.74755	4.24897
PotentialPeaks_H3K27Ac_peak_1669	171	72	54	36	4	2.19424	1.86409	1.43525
PotentialPeaks_H3K27Ac_peak_1670	887	647	398	217	52	3.51553	2.83616	2.00685
PotentialPeaks_H3K27Ac_peak_1671	643	223	169	87	25	2.72376	2.35427	1.50939
PotentialPeaks_H3K27Ac_peak_1672	1591	1387	1233	667	78	4.15123	3.98349	3.11268
PotentialPeaks_H3K27Ac_peak_1673	213	7	40	5	9	-0.0165094	1.26728	-0.147754
PotentialPeaks_H3K27Ac_peak_1674	916	30	132	41	35	0.0559025	1.74179	0.365231
PotentialPeaks_H3K27Ac_peak_1675	151	10	16	6	11	0.0635779	0.363138	-0.17743
PotentialPeaks_H3K27Ac_peak_1676	239	10	22	28	2	0.561758	1.10925	1.32075
PotentialPeaks_H3K27Ac_peak_1677	325	26	14	15	15	0.579416	0.0939893	0.141295
PotentialPeaks_H3K27Ac_peak_1678	162	12	15	9	8	0.318228	0.46507	0.154729
PotentialPeaks_H3K27Ac_peak_1679	157	8	10	7	6	0.203462	0.318939	0.142061
PotentialPeaks_H3K27Ac_peak_1680	393	38	46	37	14	0.984024	1.18333	0.957056
PotentialPeaks_H3K27Ac_peak_1681	190	6	10	18	6	0.0779309	0.318939	0.705962
PotentialPeaks_H3K27Ac_peak_1682	258	21	20	14	4	0.94426	0.904731	0.641697
PotentialPeaks_H3K27Ac_peak_1683	151	13	21	2	7	0.421664	0.773136	-0.266392
PotentialPeaks_H3K27Ac_peak_1684	222	22	17	7	9	0.707856	0.504323	-0.0165094
PotentialPeaks_H3K27Ac_peak_1685	237	29	20	27	18	0.559725	0.237797	0.494136
PotentialPeaks_H3K27Ac_peak_1686	953	514	435	281	30	3.72016	3.4873	2.88463
PotentialPeaks_H3K27Ac_peak_1687	158	7	20	7	11	-0.1133	0.533063	-0.1133
PotentialPeaks_H3K27Ac_peak_1688	352	18	44	21	13	0.359898	1.17933	0.481888
PotentialPeaks_H3K27Ac_peak_1689	2453	485	1001	646	188	1.57848	2.59992	1.9805
PotentialPeaks_H3K27Ac_peak_1690	801	101	200	141	37	1.35101	2.23553	1.77527
PotentialPeaks_H3K27Ac_peak_1691	1251	225	597	322	60	1.9032	3.25005	2.39119
PotentialPeaks_H3K27Ac_peak_1692	253	17	86	23	12	0.361468	1.9895	0.602476
PotentialPeaks_H3K27Ac_peak_1693	181	12	25	11	3	0.604031	1.15423	0.551563
PotentialPeaks_H3K27Ac_peak_1694	189	16	24	5	7	0.563683	0.885611	-0.0439997
PotentialPeaks_H3K27Ac_peak_1695	190	8	10	16	9	0.0448912	0.160368	0.459929
PotentialPeaks_H3K27Ac_peak_1696	1116	501	528	240	18	4.08189	4.15533	3.06787
PotentialPeaks_H3K27Ac_peak_1697	282	18	30	14	11	0.450601	0.8867	0.270029
PotentialPeaks_H3K27Ac_peak_1698	161	9	7	13	2	0.505174	0.38488	0.719299
PotentialPeaks_H3K27Ac_peak_1699	298	11	25	31	5	0.430368	1.03303	1.23007
PotentialPeaks_H3K27Ac_peak_1700	382	18	41	43	30	-0.242224	0.503203	0.552956
PotentialPeaks_H3K27Ac_peak_1701	195	16	6	13	9	0.459929	-0.0806397	0.31791
PotentialPeaks_H3K27Ac_peak_1702	205	18	9	21	11	0.450601	0.00699432	0.572591
PotentialPeaks_H3K27Ac_peak_1703	1208	767	746	420	44	3.92591	3.88669	3.08123
PotentialPeaks_H3K27Ac_peak_1704	1295	2327	2193	1330	81	4.8475	4.76253	4.04782
PotentialPeaks_H3K27Ac_peak_1705	155	19	0	7	4	0.864089	-0.265194	0.258368
PotentialPeaks_H3K27Ac_peak_1706	184	13	8	10	14	0.087117	-0.185901	-0.0704243
PotentialPeaks_H3K27Ac_peak_1707	265	27	18	21	20	0.419796	0.0809942	0.202985
PotentialPeaks_H3K27Ac_peak_1708	202	15	12	14	10	0.364918	0.218077	0.317612
PotentialPeaks_H3K27Ac_peak_1709	459	52	38	63	7	1.65115	1.31857	1.86746
PotentialPeaks_H3K27Ac_peak_1710	813	102	61	117	44	1.19568	0.579828	1.36832
PotentialPeaks_H3K27Ac_peak_1711	155	9	18	18	11	0.00699432	0.450601	0.450601
PotentialPeaks_H3K27Ac_peak_1712	1112	352	333	310	47	2.77033	2.69385	2.5955
PotentialPeaks_H3K27Ac_peak_1713	305	25	30	30	22	0.280387	0.446397	0.446397
PotentialPeaks_H3K27Ac_peak_1714	248	16	10	22	14	0.229136	-0.0704243	0.477064
PotentialPeaks_H3K27Ac_peak_1715	437	76	47	42	17	1.63009	1.08381	0.96451
PotentialPeaks_H3K27Ac_peak_1716	180	12	2	16	5	0.482836	-0.154594	0.675481
PotentialPeaks_H3K27Ac_peak_1717	382	74	19	29	19	1.52208	0.159506	0.522076
PotentialPeaks_H3K27Ac_peak_1718	187	16	12	6	8	0.510873	0.318228	-0.0296951
PotentialPeaks_H3K27Ac_peak_1719	1086	87	66	109	39	1.11724	0.788291	1.39652
PotentialPeaks_H3K27Ac_peak_1720	577	49	36	75	13	1.2948	0.972875	1.78023
PotentialPeaks_H3K27Ac_peak_1721	369	28	26	47	19	0.489654	0.42254	1.0075
PotentialPeaks_H3K27Ac_peak_1722	210	8	5	22	9	0.0448912	-0.147754	0.707856
PotentialPeaks_H3K27Ac_peak_1723	255	6	3	39	6	0.0779309	-0.133573	1.39986
PotentialPeaks_H3K27Ac_peak_1724	185	12	7	17	8	0.318228	0.0344352	0.555267
PotentialPeaks_H3K27Ac_peak_1725	927	64	52	146	50	0.505341	0.270876	1.52326
PotentialPeaks_H3K27Ac_peak_1726	588	48	21	59	40	0.406419	-0.384128	0.635238
PotentialPeaks_H3K27Ac_peak_1727	286	21	17	28	11	0.572591	0.407532	0.82257
PotentialPeaks_H3K27Ac_peak_1728	494	187	172	81	50	1.84875	1.738	0.783326
PotentialPeaks_H3K27Ac_peak_1729	1185	754	277	128	58	3.61563	2.22167	1.19684
PotentialPeaks_H3K27Ac_peak_1730	646	519	165	89	31	3.70504	2.14149	1.35589
PotentialPeaks_H3K27Ac_peak_1731	196	97	23	11	11	2.18332	0.64854	0.118026
PotentialPeaks_H3K27Ac_peak_1732	156	29	17	9	6	1.11035	0.662893	0.262355
PotentialPeaks_H3K27Ac_peak_1733	384	30	17	18	17	0.630091	0.150924	0.193992
PotentialPeaks_H3K27Ac_peak_1734	206	8	9	9	3	0.381638	0.440532	0.440532
PotentialPeaks_H3K27Ac_peak_1735	340	21	26	21	23	0.0981978	0.281062	0.0981978
PotentialPeaks_H3K27Ac_peak_1736	185	13	13	7	18	-0.0741474	-0.0741474	-0.408566
PotentialPeaks_H3K27Ac_peak_1737	1134	85	130	99	65	0.560867	1.09248	0.748146
PotentialPeaks_H3K27Ac_peak_1738	242	8	10	12	11	-0.0518994	0.0635779	0.170493
PotentialPeaks_H3K27Ac_peak_1739	1418	2534	1306	559	51	5.47918	4.5314	3.33032
PotentialPeaks_H3K27Ac_peak_1740	408	34	28	23	12	0.96093	0.776505	0.602476
PotentialPeaks_H3K27Ac_peak_1741	170	10	7	13	11	0.0635779	-0.1133	0.221119
PotentialPeaks_H3K27Ac_peak_1742	174	17	4	15	2	0.905712	0.183246	0.815515
PotentialPeaks_H3K27Ac_peak_1743	355	40	21	32	10	1.21808	0.620175	0.995684
PotentialPeaks_H3K27Ac_peak_1744	178	17	7	11	3	0.84107	0.320238	0.551563
PotentialPeaks_H3K27Ac_peak_1745	164	18	11	16	7	0.651146	0.31857	0.563683
PotentialPeaks_H3K27Ac_peak_1746	527	71	45	49	21	1.40069	0.888487	0.980118
PotentialPeaks_H3K27Ac_peak_1747	166	14	15	11	5	0.582372	0.629677	0.430368
PotentialPeaks_H3K27Ac_peak_1748	461	37	33	58	19	0.758143	0.644933	1.23968
PotentialPeaks_H3K27Ac_peak_1749	192	12	12	11	8	0.318228	0.318228	0.265761
PotentialPeaks_H3K27Ac_peak_1750	338	43	15	28	20	0.876174	-0.0522724	0.452963
PotentialPeaks_H3K27Ac_peak_1751	239	11	23	26	15	-0.0580138	0.472501	0.579416
PotentialPeaks_H3K27Ac_peak_1752	305	26	30	14	13	0.664752	0.795997	0.179326
PotentialPeaks_H3K27Ac_peak_1753	209	28	19	14	6	1.07793	0.747782	0.52539
PotentialPeaks_H3K27Ac_peak_1754	311	29	37	16	12	0.808927	1.04499	0.317074
PotentialPeaks_H3K27Ac_peak_1755	151	20	9	6	20	0.163456	-0.362612	-0.547037
PotentialPeaks_H3K27Ac_peak_1756	154	13	12	9	7	0.421664	0.371038	0.207539
PotentialPeaks_H3K27Ac_peak_1757	243	31	15	5	8	1.06546	0.46507	-0.0968093
PotentialPeaks_H3K27Ac_peak_1758	1056	186	69	43	37	2.13886	0.890037	0.363289
PotentialPeaks_H3K27Ac_peak_1759	164	5	4	14	3	0.188993	0.118604	0.703566
PotentialPeaks_H3K27Ac_peak_1760	157	12	3	8	8	0.318228	-0.241199	0.0958357
PotentialPeaks_H3K27Ac_peak_1761	435	23	11	43	18	0.353274	-0.177241	0.950515
PotentialPeaks_H3K27Ac_peak_1762	632	24	24	126	20	0.315459	0.315459	2.14328
PotentialPeaks_H3K27Ac_peak_1763	409	37	40	67	24	0.583362	0.662796	1.23048
PotentialPeaks_H3K27Ac_peak_1764	283	18	21	48	26	-0.121481	0.000509234	0.791056
PotentialPeaks_H3K27Ac_peak_1765	176	16	11	18	12	0.317074	0.0719614	0.404537
PotentialPeaks_H3K27Ac_peak_1766	153	10	5	14	5	0.375921	0.0677984	0.582372
PotentialPeaks_H3K27Ac_peak_1767	742	58	29	83	31	0.851096	0.133496	1.271
PotentialPeaks_H3K27Ac_peak_1768	409	16	12	90	25	-0.177111	-0.369756	1.55081
PotentialPeaks_H3K27Ac_peak_1769	319	15	14	35	15	0.141295	0.0939893	0.859524
PotentialPeaks_H3K27Ac_peak_1770	276	15	10	35	16	0.100448	-0.153309	0.818677
PotentialPeaks_H3K27Ac_peak_1771	151	19	7	4	10	0.540005	-0.0657162	-0.26735
PotentialPeaks_H3K27Ac_peak_1772	197	9	14	13	4	0.378662	0.641697	0.592787
PotentialPeaks_H3K27Ac_peak_1773	180	7	4	24	12	-0.159364	-0.360998	0.639002
PotentialPeaks_H3K27Ac_peak_1774	805	788	789	364	16	4.7973	4.7991	3.71611
PotentialPeaks_H3K27Ac_peak_1775	331	68	64	43	18	1.46019	1.3898	0.950515
PotentialPeaks_H3K27Ac_peak_1776	1521	1349	1081	655	82	4.0538	3.73846	3.02929
PotentialPeaks_H3K27Ac_peak_1777	151	7	6	8	10	-0.0657162	-0.129847	-0.00431566
PotentialPeaks_H3K27Ac_peak_1778	214	40	37	10	9	1.26728	1.18785	0.160368
PotentialPeaks_H3K27Ac_peak_1779	831	772	410	140	33	4.20801	3.32067	1.87136
PotentialPeaks_H3K27Ac_peak_1780	375	138	67	128	14	2.49592	1.60418	2.39906
PotentialPeaks_H3K27Ac_peak_1781	1426	1601	1343	791	45	4.94972	4.69894	3.94704
PotentialPeaks_H3K27Ac_peak_1782	1399	1275	1493	694	71	4.13833	4.36343	3.27573
PotentialPeaks_H3K27Ac_peak_1783	191	14	22	4	7	0.470573	0.81161	-0.114389
PotentialPeaks_H3K27Ac_peak_1784	1099	926	346	260	30	4.5499	3.17016	2.77884
PotentialPeaks_H3K27Ac_peak_1785	243	17	16	20	10	0.455116	0.410722	0.580647
PotentialPeaks_H3K27Ac_peak_1786	152	8	8	11	9	0.0448912	0.0448912	0.214816
PotentialPeaks_H3K27Ac_peak_1787	720	42	41	73	41	0.240483	0.215392	0.858235
PotentialPeaks_H3K27Ac_peak_1788	223	25	15	5	8	0.868425	0.46507	-0.0968093
PotentialPeaks_H3K27Ac_peak_1789	281	22	17	11	20	0.241459	0.0379255	-0.251581
PotentialPeaks_H3K27Ac_peak_1790	599	105	76	18	33	1.50482	1.10952	-0.32658
PotentialPeaks_H3K27Ac_peak_1791	181	33	30	4	13	0.887145	0.795997	-0.405637
PotentialPeaks_H3K27Ac_peak_1792	1113	239	113	12	72	1.78261	0.799481	-1.40439
PotentialPeaks_H3K27Ac_peak_1793	451	72	24	19	8	1.9703	0.832801	0.640156
PotentialPeaks_H3K27Ac_peak_1794	529	74	27	17	24	1.34729	0.281706	-0.100165
PotentialPeaks_H3K27Ac_peak_1795	176	16	6	7	9	0.459929	-0.0806397	-0.0165094
PotentialPeaks_H3K27Ac_peak_1796	287	7	23	29	17	-0.369909	0.391932	0.598383
PotentialPeaks_H3K27Ac_peak_1797	256	10	14	16	7	0.264123	0.470573	0.563683
PotentialPeaks_H3K27Ac_peak_1798	336	14	25	16	17	0.0134201	0.464081	0.106529
PotentialPeaks_H3K27Ac_peak_1799	203	9	6	25	8	0.154729	-0.0296951	0.868425
PotentialPeaks_H3K27Ac_peak_1800	422	29	16	49	25	0.314742	-0.177111	0.845257
PotentialPeaks_H3K27Ac_peak_1801	195	11	15	18	9	0.214816	0.414125	0.547391
PotentialPeaks_H3K27Ac_peak_1802	456	163	14	35	29	2.18338	-0.393545	0.37199
PotentialPeaks_H3K27Ac_peak_1803	571	189	41	26	31	2.32112	0.474533	0.0339601
PotentialPeaks_H3K27Ac_peak_1804	1081	1123	794	737	64	4.07332	3.58154	3.47627
PotentialPeaks_H3K27Ac_peak_1805	151	12	4	7	10	0.218077	-0.26735	-0.0657162
PotentialPeaks_H3K27Ac_peak_1806	220	17	17	11	14	0.27353	0.27353	-0.0159765
PotentialPeaks_H3K27Ac_peak_1807	237	25	9	10	13	0.629987	-0.0837088	-0.0271253
PotentialPeaks_H3K27Ac_peak_1808	343	59	29	7	21	1.18657	0.449603	-0.518688
PotentialPeaks_H3K27Ac_peak_1809	288	41	33	4	12	1.14996	0.931784	-0.360998
PotentialPeaks_H3K27Ac_peak_1810	993	156	122	28	57	1.47184	1.1541	-0.494994
PotentialPeaks_H3K27Ac_peak_1811	151	20	6	1	6	0.788424	0.0779309	-0.294038
PotentialPeaks_H3K27Ac_peak_1812	1182	176	67	126	51	1.74786	0.537936	1.31264
PotentialPeaks_H3K27Ac_peak_1813	653	260	155	140	21	3.06627	2.3756	2.24315
PotentialPeaks_H3K27Ac_peak_1814	159	24	8	2	2	1.18325	0.446281	0.0312432
PotentialPeaks_H3K27Ac_peak_1815	894	3079	2005	936	24	6.45116	5.83629	4.75026
PotentialPeaks_H3K27Ac_peak_1816	294	96	49	211	7	2.37104	1.58605	3.39023
PotentialPeaks_H3K27Ac_peak_1817	367	37	19	25	20	0.721452	0.122814	0.351083
PotentialPeaks_H3K27Ac_peak_1818	155	12	10	15	8	0.318228	0.211313	0.46507
PotentialPeaks_H3K27Ac_peak_1819	369	42	18	23	16	1.00423	0.233715	0.431654
PotentialPeaks_H3K27Ac_peak_1820	429	56	26	43	27	0.929835	0.152227	0.642553
PotentialPeaks_H3K27Ac_peak_1821	669	62	27	56	31	0.927045	0.0679074	0.811568
PotentialPeaks_H3K27Ac_peak_1822	343	13	12	45	16	0.00423273	-0.0463933	1.07699
PotentialPeaks_H3K27Ac_peak_1823	838	46	81	88	58	-0.0188874	0.626829	0.727356
PotentialPeaks_H3K27Ac_peak_1824	453	36	29	33	28	0.429861	0.221275	0.344131
PotentialPeaks_H3K27Ac_peak_1825	151	8	14	3	14	-0.185901	0.136027	-0.522936
PotentialPeaks_H3K27Ac_peak_1826	228	17	10	3	4	0.7792	0.435246	-0.0172663
PotentialPeaks_H3K27Ac_peak_1827	356	18	63	7	30	-0.242224	0.974094	-0.806125
PotentialPeaks_H3K27Ac_peak_1828	272	5	40	12	21	-0.649933	0.765105	-0.234895
PotentialPeaks_H3K27Ac_peak_1829	348	17	92	12	21	0.00214413	1.71264	-0.234895
PotentialPeaks_H3K27Ac_peak_1830	630	34	97	129	32	0.257387	1.43371	1.79344
PotentialPeaks_H3K27Ac_peak_1831	328	18	45	32	22	0.0102975	0.853572	0.507797
PotentialPeaks_H3K27Ac_peak_1832	178	13	14	3	19	-0.111796	-0.0628867	-0.72185
PotentialPeaks_H3K27Ac_peak_1833	930	140	72	44	39	1.71614	0.890171	0.33763
PotentialPeaks_H3K27Ac_peak_1834	513	64	29	19	29	1.02149	0.191418	-0.171152
PotentialPeaks_H3K27Ac_peak_1835	154	7	18	5	7	0.0872448	0.651146	-0.0439997
PotentialPeaks_H3K27Ac_peak_1836	465	26	61	7	16	0.538569	1.41304	-0.330186
PotentialPeaks_H3K27Ac_peak_1837	229	11	65	1	11	0.118026	1.70299	-0.549399
PotentialPeaks_H3K27Ac_peak_1838	159	5	19	1	7	-0.0439997	0.692966	-0.348854
PotentialPeaks_H3K27Ac_peak_1839	418	66	27	9	13	1.62999	0.6987	-0.0837088
PotentialPeaks_H3K27Ac_peak_1840	154	15	5	2	8	0.46507	-0.0968093	-0.319202
PotentialPeaks_H3K27Ac_peak_1841	157	1	18	1	6	-0.294038	0.705962	-0.294038
PotentialPeaks_H3K27Ac_peak_1842	180	2	48	3	13	-0.55764	1.27244	-0.479637
PotentialPeaks_H3K27Ac_peak_1843	347	10	62	2	27	-0.539651	1.04531	-1.07017
PotentialPeaks_H3K27Ac_peak_1844	178	2	31	7	12	-0.513001	0.871663	-0.159364
PotentialPeaks_H3K27Ac_peak_1845	156	4	11	7	10	-0.26735	0.165609	-0.0657162
PotentialPeaks_H3K27Ac_peak_1846	159	6	20	3	11	-0.17743	0.533063	-0.388934
PotentialPeaks_H3K27Ac_peak_1847	377	15	51	6	16	0.100448	1.21234	-0.394317
PotentialPeaks_H3K27Ac_peak_1848	697	20	120	17	28	-0.100653	1.81688	-0.226184
PotentialPeaks_H3K27Ac_peak_1849	514	14	83	10	29	-0.393545	1.32892	-0.599996
PotentialPeaks_H3K27Ac_peak_1850	155	6	29	1	3	0.256107	1.28853	-0.115861
PotentialPeaks_H3K27Ac_peak_1851	654	21	114	14	38	-0.33507	1.47784	-0.637633
PotentialPeaks_H3K27Ac_peak_1852	452	24	53	12	21	0.279678	1.06627	-0.234895
PotentialPeaks_H3K27Ac_peak_1853	155	7	20	2	10	-0.0657162	0.580647	-0.419353
PotentialPeaks_H3K27Ac_peak_1854	198	9	11	5	15	-0.169045	-0.0580138	-0.420584
PotentialPeaks_H3K27Ac_peak_1855	524	9	78	22	28	-0.626722	1.28401	-0.0226509
PotentialPeaks_H3K27Ac_peak_1856	634	11	95	24	35	-0.712772	1.32676	-0.145731
PotentialPeaks_H3K27Ac_peak_1857	498	17	59	26	37	-0.47496	0.709464	-0.127037
PotentialPeaks_H3K27Ac_peak_1858	288	8	14	25	21	-0.457287	-0.135359	0.315302
PotentialPeaks_H3K27Ac_peak_1859	265	13	26	10	5	0.533462	1.0678	0.375921
PotentialPeaks_H3K27Ac_peak_1860	278	8	51	4	27	-0.655128	0.825999	-0.918162
PotentialPeaks_H3K27Ac_peak_1861	267	10	34	5	16	-0.153309	0.790108	-0.461431
PotentialPeaks_H3K27Ac_peak_1862	151	5	20	6	3	0.188993	0.966601	0.256107
PotentialPeaks_H3K27Ac_peak_1863	160	8	16	3	10	-0.00431566	0.410722	-0.341351
PotentialPeaks_H3K27Ac_peak_1864	278	7	39	6	12	-0.159364	1.09843	-0.223495
PotentialPeaks_H3K27Ac_peak_1865	151	16	15	3	8	0.510873	0.46507	-0.241199
PotentialPeaks_H3K27Ac_peak_1866	241	25	36	5	11	0.72069	1.06358	-0.244544
PotentialPeaks_H3K27Ac_peak_1867	1078	247	652	690	38	2.4944	3.83918	3.919
PotentialPeaks_H3K27Ac_peak_1868	546	140	180	146	19	2.31562	2.64493	2.37007
PotentialPeaks_H3K27Ac_peak_1869	182	4	14	13	11	-0.314934	0.270029	0.221119
PotentialPeaks_H3K27Ac_peak_1870	346	18	32	20	30	-0.242224	0.255275	-0.159762
PotentialPeaks_H3K27Ac_peak_1871	711	37	77	48	37	0.208566	1.0198	0.480646
PotentialPeaks_H3K27Ac_peak_1872	154	8	11	15	6	0.203462	0.373387	0.572696
PotentialPeaks_H3K27Ac_peak_1873	156	7	8	12	9	-0.0165094	0.0448912	0.267284
PotentialPeaks_H3K27Ac_peak_1874	158	10	16	8	8	0.211313	0.510873	0.0958357
PotentialPeaks_H3K27Ac_peak_1875	151	3	4	22	5	-0.0765915	-0.00259095	0.923408
PotentialPeaks_H3K27Ac_peak_1876	164	7	16	8	7	0.0872448	0.563683	0.148645
PotentialPeaks_H3K27Ac_peak_1877	1700	122	288	286	117	0.321389	1.46079	1.45127
PotentialPeaks_H3K27Ac_peak_1878	231	10	18	6	9	0.160368	0.547391	-0.0806397
PotentialPeaks_H3K27Ac_peak_1879	154	7	7	13	5	0.199043	0.199043	0.533462
PotentialPeaks_H3K27Ac_peak_1880	359	21	22	30	16	0.355705	0.394179	0.669814
PotentialPeaks_H3K27Ac_peak_1881	193	7	13	12	19	-0.446215	-0.111796	-0.162422
PotentialPeaks_H3K27Ac_peak_1882	411	26	28	31	26	0.183373	0.250487	0.345645
PotentialPeaks_H3K27Ac_peak_1883	400	27	64	50	18	0.494136	1.3898	1.11227
PotentialPeaks_H3K27Ac_peak_1884	275	19	16	23	14	0.358419	0.229136	0.514538
PotentialPeaks_H3K27Ac_peak_1885	156	10	16	13	5	0.375921	0.675481	0.533462
PotentialPeaks_H3K27Ac_peak_1886	173	8	8	14	11	-0.0518994	-0.0518994	0.270029
PotentialPeaks_H3K27Ac_peak_1887	175	8	17	7	5	0.260443	0.719875	0.199043
PotentialPeaks_H3K27Ac_peak_1888	301	15	25	22	18	0.022068	0.425424	0.315799
PotentialPeaks_H3K27Ac_peak_1889	202	11	10	19	10	0.165609	0.111162	0.540005
PotentialPeaks_H3K27Ac_peak_1890	189	17	20	14	7	0.608077	0.733608	0.470573
PotentialPeaks_H3K27Ac_peak_1891	264	15	15	8	15	0.141295	0.141295	-0.227939
PotentialPeaks_H3K27Ac_peak_1892	463	38	30	20	26	0.545943	0.314618	-0.0390191
PotentialPeaks_H3K27Ac_peak_1893	357	24	22	29	3	1.1186	1.0446	1.28853
PotentialPeaks_H3K27Ac_peak_1894	474	32	31	42	13	0.857398	0.827024	1.13042
PotentialPeaks_H3K27Ac_peak_1895	483	47	46	40	29	0.676845	0.653761	0.50692
PotentialPeaks_H3K27Ac_peak_1896	312	13	29	6	20	-0.148488	0.485384	-0.547037
PotentialPeaks_H3K27Ac_peak_1897	302	17	57	25	22	-0.0327712	1.11266	0.280387
PotentialPeaks_H3K27Ac_peak_1898	571	39	110	91	49	-0.0144154	1.1815	0.945692
PotentialPeaks_H3K27Ac_peak_1899	511	39	63	88	29	0.480924	1.00335	1.4
PotentialPeaks_H3K27Ac_peak_1900	151	10	6	10	5	0.375921	0.134913	0.375921
PotentialPeaks_H3K27Ac_peak_1901	158	9	7	11	4	0.378662	0.258368	0.489694
PotentialPeaks_H3K27Ac_peak_1902	171	7	24	1	6	0.142061	0.940427	-0.294038
PotentialPeaks_H3K27Ac_peak_1903	313	12	52	4	15	-0.00554634	1.27456	-0.490973
PotentialPeaks_H3K27Ac_peak_1904	188	3	31	0	6	-0.133573	1.17309	-0.381501
PotentialPeaks_H3K27Ac_peak_1905	459	13	14	50	24	-0.286578	-0.237668	0.899835
PotentialPeaks_H3K27Ac_peak_1906	151	17	3	12	9	0.504323	-0.292144	0.267284
PotentialPeaks_H3K27Ac_peak_1907	874	474	240	178	41	3.31914	2.3825	1.98241
PotentialPeaks_H3K27Ac_peak_1908	621	227	181	191	47	2.17158	1.86882	1.94026
PotentialPeaks_H3K27Ac_peak_1909	351	35	35	56	17	0.778955	0.778955	1.27645
PotentialPeaks_H3K27Ac_peak_1910	201	24	7	22	18	0.3898	-0.408566	0.315799
PotentialPeaks_H3K27Ac_peak_1911	247	25	18	31	22	0.280387	0.0102975	0.477424
PotentialPeaks_H3K27Ac_peak_1912	297	32	11	47	10	0.995684	0.165609	1.388
PotentialPeaks_H3K27Ac_peak_1913	690	82	64	89	37	1.09536	0.802574	1.19489
PotentialPeaks_H3K27Ac_peak_1914	173	13	4	9	9	0.31791	-0.218143	0.103785
PotentialPeaks_H3K27Ac_peak_1915	234	26	16	7	14	0.621453	0.229136	-0.247302
PotentialPeaks_H3K27Ac_peak_1916	256	25	19	4	9	0.817481	0.589212	-0.218143
PotentialPeaks_H3K27Ac_peak_1917	184	17	9	6	3	0.84107	0.440532	0.256107
PotentialPeaks_H3K27Ac_peak_1918	224	12	13	18	21	-0.234895	-0.184269	0.0452129
PotentialPeaks_H3K27Ac_peak_1919	289	15	22	16	20	-0.0522724	0.241459	-0.00646867
PotentialPeaks_H3K27Ac_peak_1920	795	54	46	90	38	0.58476	0.409673	1.1834
PotentialPeaks_H3K27Ac_peak_1921	1538	111	248	270	97	0.429538	1.48525	1.60072
PotentialPeaks_H3K27Ac_peak_1922	183	15	20	23	6	0.572696	0.788424	0.903901
PotentialPeaks_H3K27Ac_peak_1923	556	32	44	41	30	0.255275	0.577204	0.503203
PotentialPeaks_H3K27Ac_peak_1924	319	27	32	20	14	0.655401	0.814099	0.399061
PotentialPeaks_H3K27Ac_peak_1925	193	13	37	7	18	-0.0741474	0.795792	-0.408566
PotentialPeaks_H3K27Ac_peak_1926	272	33	29	6	14	0.843846	0.720989	-0.311432
PotentialPeaks_H3K27Ac_peak_1927	407	50	83	11	16	1.19065	1.77561	-0.0988608
PotentialPeaks_H3K27Ac_peak_1928	814	85	219	27	46	0.926736	2.14504	-0.30521
PotentialPeaks_H3K27Ac_peak_1929	184	13	36	4	6	0.47648	1.31894	-0.0595727
PotentialPeaks_H3K27Ac_peak_1930	421	33	49	5	15	0.801809	1.20947	-0.420584
PotentialPeaks_H3K27Ac_peak_1931	228	21	9	14	19	0.239676	-0.325921	-0.0628867
PotentialPeaks_H3K27Ac_peak_1932	183	9	6	16	3	0.440532	0.256107	0.796676
PotentialPeaks_H3K27Ac_peak_1933	1347	172	198	201	92	1.05855	1.24543	1.26551
PotentialPeaks_H3K27Ac_peak_1934	153	13	5	14	3	0.654657	0.188993	0.703566
PotentialPeaks_H3K27Ac_peak_1935	255	17	20	12	13	0.316829	0.44236	0.07979
PotentialPeaks_H3K27Ac_peak_1936	351	31	19	14	11	0.917727	0.492421	0.270029
PotentialPeaks_H3K27Ac_peak_1937	154	10	9	5	9	0.160368	0.103785	-0.147754
PotentialPeaks_H3K27Ac_peak_1938	685	146	79	17	20	2.33338	1.56339	0.0379255
PotentialPeaks_H3K27Ac_peak_1939	175	26	12	4	6	1.01082	0.425854	-0.0595727
PotentialPeaks_H3K27Ac_peak_1940	230	17	8	9	14	0.27353	-0.185901	-0.127008
PotentialPeaks_H3K27Ac_peak_1941	259	24	17	10	11	0.685066	0.407532	0.0635779
PotentialPeaks_H3K27Ac_peak_1942	266	13	14	16	7	0.421664	0.470573	0.563683
PotentialPeaks_H3K27Ac_peak_1943	308	22	11	18	17	0.354457	-0.138583	0.193992
PotentialPeaks_H3K27Ac_peak_1944	160	7	1	16	3	0.320238	-0.115861	0.796676
PotentialPeaks_H3K27Ac_peak_1945	571	52	43	35	36	0.593724	0.388905	0.178687
PotentialPeaks_H3K27Ac_peak_1946	292	20	11	22	12	0.486999	0.0719614	0.565001
PotentialPeaks_H3K27Ac_peak_1947	178	8	9	16	7	0.148645	0.207539	0.563683
PotentialPeaks_H3K27Ac_peak_1948	156	7	4	20	12	-0.159364	-0.360998	0.486999
PotentialPeaks_H3K27Ac_peak_1949	159	11	9	9	2	0.616206	0.505174	0.505174
PotentialPeaks_H3K27Ac_peak_1950	232	17	13	20	10	0.455116	0.268703	0.580647
PotentialPeaks_H3K27Ac_peak_1951	990	98	65	131	45	1.1235	0.630461	1.49028
PotentialPeaks_H3K27Ac_peak_1952	413	34	23	35	21	0.601606	0.243152	0.630175
PotentialPeaks_H3K27Ac_peak_1953	297	19	28	22	14	0.358419	0.688568	0.477064
PotentialPeaks_H3K27Ac_peak_1954	475	40	11	58	22	0.73019	-0.322278	1.13229
PotentialPeaks_H3K27Ac_peak_1955	189	12	11	10	11	0.170493	0.118026	0.0635779
PotentialPeaks_H3K27Ac_peak_1956	272	13	10	20	14	0.087117	-0.0704243	0.399061
PotentialPeaks_H3K27Ac_peak_1957	241	21	13	15	15	0.396552	0.0450797	0.141295
PotentialPeaks_H3K27Ac_peak_1958	577	49	24	43	27	0.782277	0.0818377	0.642553
PotentialPeaks_H3K27Ac_peak_1959	238	16	13	19	17	0.106529	-0.0354895	0.235812
PotentialPeaks_H3K27Ac_peak_1960	178	20	12	7	7	0.733608	0.371038	0.0872448
PotentialPeaks_H3K27Ac_peak_1961	712	71	52	52	34	1.00184	0.646362	0.646362
PotentialPeaks_H3K27Ac_peak_1962	185	25	15	9	6	0.976051	0.572696	0.262355
PotentialPeaks_H3K27Ac_peak_1963	151	7	8	18	8	0.0344352	0.0958357	0.598336
PotentialPeaks_H3K27Ac_peak_1964	156	9	27	10	16	-0.209892	0.572516	-0.153309
PotentialPeaks_H3K27Ac_peak_1965	160	27	5	10	8	0.937138	-0.0968093	0.211313
PotentialPeaks_H3K27Ac_peak_1966	558	91	58	35	47	0.988239	0.456225	-0.080803
PotentialPeaks_H3K27Ac_peak_1967	437	39	28	14	23	0.670104	0.348176	-0.204365
PotentialPeaks_H3K27Ac_peak_1968	448	41	27	17	23	0.721634	0.315009	-0.0668614
PotentialPeaks_H3K27Ac_peak_1969	324	34	22	13	12	0.96093	0.565001	0.175055
PotentialPeaks_H3K27Ac_peak_1970	1030	1372	1890	191	15	5.62589	6.08343	2.88059
PotentialPeaks_H3K27Ac_peak_1971	156	2	5	10	7	-0.266392	-0.0439997	0.264123
PotentialPeaks_H3K27Ac_peak_1972	349	30	16	27	19	0.553785	0.0302227	0.456487
PotentialPeaks_H3K27Ac_peak_1973	207	10	10	8	12	0.0175136	0.0175136	-0.0979636
PotentialPeaks_H3K27Ac_peak_1974	190	12	17	4	10	0.218077	0.455116	-0.26735
PotentialPeaks_H3K27Ac_peak_1975	639	202	140	337	36	2.27445	1.79166	2.96979
PotentialPeaks_H3K27Ac_peak_1976	1062	227	215	255	38	2.38029	2.30723	2.53763
PotentialPeaks_H3K27Ac_peak_1977	275	18	11	12	6	0.705962	0.373387	0.425854
PotentialPeaks_H3K27Ac_peak_1978	253	21	16	8	10	0.620175	0.410722	-0.00431566
PotentialPeaks_H3K27Ac_peak_1979	155	19	7	4	2	0.990601	0.38488	0.183246
PotentialPeaks_H3K27Ac_peak_1980	151	9	5	3	3	0.440532	0.188993	0.0446034
PotentialPeaks_H3K27Ac_peak_1981	1224	2180	1069	661	24	5.9561	4.93892	4.25845
PotentialPeaks_H3K27Ac_peak_1982	249	70	62	95	3	2.22294	2.08208	2.59109
PotentialPeaks_H3K27Ac_peak_1983	172	13	11	11	3	0.654657	0.551563	0.551563
PotentialPeaks_H3K27Ac_peak_1984	151	12	7	6	2	0.668673	0.38488	0.32075
PotentialPeaks_H3K27Ac_peak_1985	296	15	28	15	15	0.141295	0.64653	0.141295
PotentialPeaks_H3K27Ac_peak_1986	680	22	180	28	31	-0.11043	2.25635	0.101074
PotentialPeaks_H3K27Ac_peak_1987	785	54	193	35	56	0.193761	1.77184	-0.263097
PotentialPeaks_H3K27Ac_peak_1988	406	21	75	9	28	-0.061125	1.23722	-0.626722
PotentialPeaks_H3K27Ac_peak_1989	1319	417	174	238	38	3.2137	2.02533	2.44416
PotentialPeaks_H3K27Ac_peak_1990	193	18	9	18	8	0.598336	0.154729	0.598336
PotentialPeaks_H3K27Ac_peak_1991	700	40	25	74	30	0.477668	0.027865	1.16217
PotentialPeaks_H3K27Ac_peak_1992	199	10	8	16	7	0.264123	0.148645	0.563683
PotentialPeaks_H3K27Ac_peak_1993	621	763	501	269	28	4.3349	3.74344	2.88424
PotentialPeaks_H3K27Ac_peak_1994	385	13	11	60	17	-0.0354895	-0.138583	1.35446
PotentialPeaks_H3K27Ac_peak_1995	313	9	24	32	17	-0.249614	0.428458	0.691492
PotentialPeaks_H3K27Ac_peak_1996	1133	438	748	516	21	3.7843	4.53518	4.01303
PotentialPeaks_H3K27Ac_peak_1997	229	14	28	16	14	0.136027	0.688568	0.229136
PotentialPeaks_H3K27Ac_peak_1998	622	108	104	68	25	1.77709	1.72978	1.21521
PotentialPeaks_H3K27Ac_peak_1999	255	11	26	16	9	0.214816	0.852246	0.459929
[truncated: 138,642 more rows]

## Sheet: H3K27ac_PromoterEnrichment
width	NP_Merged	TND1_Merged	TND10_Merged	Input	NP_MergedEnrichment	TND1_MergedEnrichment	TND10_MergedEnrichment
Lypla1	1000	758	438	263	40	4.00261	3.39487	2.85834
Tcea1	1000	366	278	164	65	2.48008	2.28948	1.77708
Atp6v1h	1000	319	301	233	41	2.77052	2.85414	2.6733
Oprk1	1000	28	22	26	37	-0.0599226	-0.113997	0.191163
Rb1cc1	1000	1188	873	409	48	4.45896	4.19334	3.30613
Fam150a	1000	61	29	14	24	1.12223	0.478527	0.0250323
St18	1000	170	245	76	42	1.89813	2.55154	1.21625
Pcmtd1	1000	1365	1313	893	49	4.63572	4.7534	4.38421
Rrs1	1000	286	185	81	41	2.62091	2.19686	1.31321
Adhfe1	1000	74	30	105	58	0.518769	-0.267843	1.31639
3110035E14Rik	1000	139	72	34	48	1.50147	0.856729	0.218668
Sgk3	1000	185	92	73	52	1.79372	1.07372	0.976996
6030422M02Rik	1000	22	11	8	44	-0.439031	-0.764835	-0.762724
Cspp1	1000	1884	1940	1290	46	5.16031	5.37188	4.96398
Prex2	1000	167	81	44	65	1.41836	0.689718	0.192122
A830018L16Rik	1000	70	51	98	52	0.568934	0.38492	1.33415
Sulf1	1000	49	48	70	50	0.205781	0.35753	0.963833
Xkr9	1000	13	9	12	47	-0.895247	-0.938545	-0.598844
Kcnb2	1000	19	16	12	39	-0.439978	-0.408798	-0.437206
Terf1	1000	762	598	289	48	3.82897	3.65939	2.82748
Rdh10	1000	1137	828	514	15	5.35828	5.0104	4.43942
Tmem70	1000	478	330	169	36	3.45463	3.09672	2.35243
Ly96	1000	160	129	124	53	1.58215	1.47977	1.61273
Gdap1	1000	20	31	93	39	-0.399336	0.145791	1.52362
Pi15	1000	30	26	31	40	-0.070019	-0.0393582	0.288805
Crispld1	1000	31	21	18	33	0.140546	-0.0538928	-0.0227518
Tcfap2d	1000	11	15	3	64	-1.32535	-0.939615	-1.45132
Tcfap2b	1000	43	174	22	83	-0.49234	1.39273	-0.720901
Mir206	1000	67	63	26	43	0.710865	0.805572	0.0646746
Mir133b	1000	15	17	14	30	-0.375491	-0.14033	-0.131148
Il17a	1000	25	13	13	42	-0.283473	-0.618389	-0.449336
Paqr8	1000	294	238	269	38	2.7316	2.60313	2.9318
Efhc1	1000	359	345	211	43	2.88657	2.99765	2.49891
Tmem14a	1000	108	132	148	60	0.944504	1.3831	1.72209
Gsta3	1000	48	21	20	49	0.204225	-0.41327	-0.274005
Khdc1a	1000	8	6	3	10	-0.00431566	-0.0509223	-0.186255
Khdc1c	1000	7	4	2	18	-0.408566	-0.496856	-0.53677
Khdc1b	1000	4	6	3	10	-0.26735	-0.0509223	-0.186255
Mir30a	1000	85	92	80	63	0.595292	0.877647	0.901395
Mir30c-2	1000	25	22	15	56	-0.57797	-0.50766	-0.614522
B3gat2	1000	82	108	134	36	1.12097	1.61629	2.04987
Col9a1	1000	38	15	21	41	0.137389	-0.5	-0.0772465
Lmbrd1	1000	378	270	293	49	2.82628	2.53715	2.82753
Lgsn	1000	39	21	32	47	0.0281314	-0.372948	0.178763
4930521A18Rik	1000	9	9	17	20	-0.362612	-0.242732	0.276918
Gm4850	1000	10	4	3	31	-0.657918	-0.889482	-0.814573
Khdrbs2	1000	85	115	133	34	1.21711	1.74479	2.08568
1700001G17Rik	1000	223	160	168	37	2.38151	2.09751	2.32241
Rab23	1000	420	335	261	46	3.03671	2.89352	2.72678
Dst	1000	607	557	306	24	4.13853	4.14907	3.44906
Imp4	1000	384	347	353	53	2.76658	2.80369	3.01092
Ptpn18	1000	56	31	35	48	0.395266	-0.0481142	0.247237
Prss39	1000	19	12	7	19	0.159506	-0.0457299	-0.213844
Cfc1	1000	11	6	7	11	0.118026	-0.0932795	0.0523649
Fam123c	1000	38	160	429	35	0.287228	2.14595	3.64126
Arhgef4	1000	151	190	260	46	1.65223	2.12469	2.72157
Plekhb2	1000	228	219	237	41	2.31324	2.42232	2.69629
Hs6st1	1000	426	145	166	27	3.54781	2.22935	2.54573
Arid5a	1000	60	65	41	40	0.654347	0.908174	0.567106
Cnnm4	1000	316	180	162	54	2.47808	1.89585	1.94158
Cnnm3	1000	638	328	184	57	3.39872	2.65266	2.05816
Cox5b	1000	330	174	197	53	2.55735	1.86972	2.21816
Zap70	1000	28	18	16	25	0.282321	0.044119	0.0909091
Cnga3	1000	9	18	27	34	-0.797244	-0.201167	0.292772
Inpp4a	1000	172	129	126	52	1.69726	1.49874	1.65101
Unc50	1000	576	405	392	55	3.29309	2.98034	3.12089
Lipt1	1000	121	115	247	60	1.08834	1.20707	2.40346
Mrpl30	1000	190	152	169	67	1.55553	1.44991	1.78607
Eif5b	1000	492	412	458	36	3.49495	3.40356	3.70979
Nms	1000	19	16	15	50	-0.687304	-0.64247	-0.508235
Pdcl3	1000	786	502	578	52	3.79013	3.33564	3.71558
Npas2	1000	181	75	142	18	2.68992	1.68901	2.59709
Rpl31	1000	646	503	318	55	3.45432	3.28225	2.83217
D1Bwg0212e	1000	614	471	274	39	3.72995	3.51898	2.93535
Map4k4	1000	1501	1412	761	25	5.38989	5.43644	4.69268
Il1r2	1000	25	19	18	45	-0.351837	-0.411636	-0.279993
Il1r1	1000	38	26	30	23	0.643632	0.409648	0.66946
Il1rl2	1000	21	18	18	37	-0.309901	-0.274462	-0.113691
Il1rl1	1000	33	19	37	42	-0.0263154	-0.347087	0.420604
Il18r1	1000	27	22	7	44	-0.260694	-0.271795	-0.824125
Il18rap	1000	13	15	18	53	-1.0193	-0.745941	-0.429091
Slc9a4	1000	25	24	26	54	-0.539404	-0.39693	-0.141835
Slc9a2	1000	120	34	47	8	2.59834	1.22214	1.6201
Tmem182	1000	32	18	17	39	0.0157019	-0.321335	-0.200167
Pou3f3	1000	1445	1185	381	20	5.50627	5.34343	3.86552
2900092D14Rik	1000	226	431	213	74	1.67603	2.75431	1.99182
Mrps9	1000	238	210	130	57	2.03426	2.04657	1.60413
Gpr45	1000	152	163	102	37	1.87296	2.12189	1.68149
AI597479	1000	1801	1727	1085	71	4.63139	4.76259	4.30008
Nck2	1000	798	403	211	45	3.9595	3.16989	2.45909
1500015O10Rik	1000	53	27	77	36	0.614786	0.0883604	1.36021
Tpp2	1000	701	621	478	65	3.38848	3.40496	3.2336
Bivm	1000	1328	1121	653	32	5.00585	4.9134	4.29931
Ercc5	1000	376	430	282	62	2.56932	2.94042	2.55146
Gulp1	1000	209	131	105	49	2.01801	1.57695	1.47493
Col3a1	1000	25	43	36	53	-0.519728	0.182506	0.183886
Wdr75	1000	835	627	645	63	3.6701	3.45143	3.68494
Dnahc7b	1000	143	88	112	47	1.55965	1.11804	1.5938
Tmeff2	1000	297	636	573	25	3.11291	4.30538	4.29303
Sdpr	1000	38	36	36	50	-0.0616995	0.0579701	0.238008
Stat4	1000	22	16	10	32	-0.138541	-0.237612	-0.386115
Stat1	1000	180	177	189	46	1.88323	2.03065	2.29252
Tmem194b	1000	507	318	175	46	3.29919	2.8219	2.19047
Hibch	1000	124	137	150	34	1.68818	1.96876	2.24155
Mstn	1000	35	41	33	68	-0.475063	-0.125365	-0.145632
Ormdl1	1000	712	395	166	55	3.59143	2.94565	1.95626
Osgepl1	1000	257	269	290	72	1.88101	2.13488	2.43844
Mir1937b-5	1000	0	0	0	0	0	0	0
Mir1937b-2	1000	0	0	0	0	0	0	0
Mir1937b-4	1000	0	0	0	0	0	0	0
Ccdc150	1000	73	62	59	43	0.811559	0.787193	0.901176
Coq10b	1000	257	252	436	41	2.47526	2.61189	3.53348
Hspe1	1000	2168	1216	637	15	6.27986	5.55609	4.74051
Mobkl3	1000	973	891	598	78	3.64676	3.71716	3.35947
Mars2	1000	209	212	120	64	1.73355	1.93908	1.38821
Plcl1	1000	193	181	149	60	1.69767	1.7957	1.73086
9130024F11Rik	1000	73	64	114	30	1.14605	1.1372	1.98433
1700066M21Rik	1000	290	246	194	39	2.68813	2.62463	2.46968
9430016H08Rik	1000	1161	852	478	29	4.90046	4.60402	3.93521
Spats2l	1000	471	378	575	38	3.38325	3.2365	3.98399
Sgol2	1000	10	2	12	15	-0.112462	-0.540776	0.196922
Aox1	1000	36	21	83	46	-0.0310353	-0.352356	1.2424
Aox3	1000	28	21	12	41	-0.158067	-0.244743	-0.479345
Aox4	1000	29	13	31	38	-0.0526701	-0.527571	0.331568
Aox3l1	1000	30	21	22	37	0.00420772	-0.152471	0.0467732
Bzw1	1000	597	288	155	8	4.77062	3.82621	3.06068
Nif3l1	1000	50	29	42	39	0.475134	0.0830551	0.61342
Ndufb3	1000	668	742	544	53	3.54057	3.86592	3.61273
Cflar	1000	236	104	183	41	2.35978	1.45269	2.34992
Casp8	1000	63	44	35	59	0.312277	0.0979052	0.0533626
Stradb	1000	716	574	389	50	3.69911	3.5621	3.19935
Cdk15	1000	49	42	50	52	0.165037	0.176812	0.545657
Fzd7	1000	834	319	198	56	3.7958	2.63243	2.17275
Gm973	1000	161	184	274	54	1.57065	1.925	2.64576
Nop58	1000	509	323	234	89	2.57937	2.14899	1.92132
Snord70	1000	25	15	7	60	-0.65214	-0.872158	-1.1119
Snord11	1000	28	13	14	63	-0.603488	-1.01926	-0.776676
Bmpr2	1000	1453	1121	654	29	5.22018	4.99348	4.37486
Fam117b	1000	1176	644	545	55	4.3028	3.62898	3.58032
Carf	1000	1072	907	552	74	3.84463	3.80036	3.30236
Nbeal1	1000	636	397	307	59	3.35722	2.88101	2.71633
Cyp20a1	1000	712	453	533	48	3.73314	3.27074	3.67547
Abi2	1000	1079	1129	609	57	4.14229	4.38752	3.70202
Cd28	1000	21	22	18	45	-0.499935	-0.292992	-0.279993
Ctla4	1000	16	26	17	50	-0.816587	-0.250152	-0.418037
Icos	1000	26	43	21	38	-0.152206	0.497091	-0.0135676
Pard3b	1000	516	189	101	33	3.64124	2.41613	1.76015
Nrp2	1000	491	614	440	53	3.10856	3.59907	3.31634
Eef1b2	1000	511	512	585	60	3.03197	3.21804	3.59576
Snora41	1000	67	35	33	45	0.665651	0.131506	0.247254
Zdbf2	1000	614	255	454	65	3.20186	2.17195	3.16175
Adam23	1000	228	253	196	29	2.6303	2.91393	2.71477
Fastkd2	1000	192	131	174	76	1.42718	1.12057	1.69459
Gm13749	1000	57	37	43	51	0.352722	0.0659711	0.401945
Creb1	1000	1117	826	567	45	4.43654	4.17676	3.8199
Ccnyl1	1000	288	169	62	23	3.13667	2.54871	1.4313
Pikfyve	1000	385	296	224	69	2.48364	2.31148	2.13167
Pth2r	1000	41	67	22	59	-0.158614	0.566054	-0.371135
Crygf	1000	38	16	19	25	0.577777	-0.0433438	0.220192
Mtap2	1000	218	458	293	32	2.4839	3.65113	3.18491
Unc80	1000	135	225	251	41	1.62091	2.45869	2.774
Rpe	1000	417	371	170	50	2.94164	2.95372	2.07673
Cps1	1000	23	29	12	55	-0.630966	-0.245487	-0.744184
Spag16	1000	78	33	18	29	1.25415	0.457175	0.0743081
Vwc2l	1000	11	34	48	38	-0.789636	0.258304	0.776979
Atic	1000	285	158	177	48	2.45896	1.84024	2.16727
Gm8883	1000	76	40	36	42	0.882537	0.330984	0.393123
Tmem169	1000	131	86	100	44	1.51271	1.1527	1.51029
Xrcc5	1000	167	170	145	79	1.19796	1.41723	1.41481
Smarcal1	1000	195	227	275	63	1.65818	2.04757	2.50131
Rpl37a	1000	174	145	117	23	2.4586	2.34825	2.20118
Igfbp2	1000	1243	283	136	45	4.58867	2.68308	1.88047
Rufy4	1000	40	64	56	32	0.420886	1.08432	1.08337
Cxcr2	1000	28	12	13	39	-0.109829	-0.601443	-0.38658
Arpc2	1000	745	524	458	52	3.71442	3.39565	3.39001
Gpbar1	1000	30	18	17	15	0.710661	0.376762	0.433961
Pnkd	1000	364	396	362	32	3.18339	3.44889	3.47569
Gm216	1000	25	11	29	55	-0.558816	-0.982452	-0.0596856
Slc11a1	1000	24	25	19	43	-0.342247	-0.140657	-0.19836
Ctdsp1	1000	649	245	153	56	3.44169	2.27232	1.83216
Mir26b	1000	60	23	25	20	1.24146	0.398814	0.590076
Vil1	1000	86	26	24	21	1.63018	0.472986	0.524995
Rqcd1	1000	856	607	323	43	4.10401	3.78488	3.0775
Plcd4	1000	99	53	292	53	0.96821	0.408388	2.75023
Bcs1l	1000	487	403	398	51	3.13731	3.04886	3.21279
Stk36	1000	218	281	311	66	1.75611	2.28793	2.62303
Ttll4	1000	509	337	143	56	3.10065	2.70794	1.74416
Cyp27a1	1000	97	34	46	37	1.30082	0.281931	0.753042
Wnt6	1000	114	48	39	19	2.05259	1.14692	1.04395
Wnt10a	1000	71	46	39	19	1.47317	1.10111	1.04395
Cdk5r2	1000	412	299	160	36	3.24773	2.9613	2.28048
Fam134a	1000	1257	921	620	47	4.56079	4.2895	3.90668
Zfand2b	1000	477	264	349	47	3.19222	2.54688	3.10555
Ankzf1	1000	569	480	465	42	3.55127	3.47783	3.60258
Stk16	1000	358	270	170	53	2.66961	2.45973	2.02261
Dnajb2	1000	414	298	475	52	2.89086	2.61345	3.44084
Des	1000	89	37	24	20	1.70778	0.841332	0.554452
Speg	1000	138	86	20	29	1.96635	1.51489	0.15677
Gmppa	1000	134	78	115	37	1.70946	1.19266	1.83227
Accn4	1000	361	407	96	38	3.0139	3.33896	1.58433
Tmem198	1000	880	816	419	30	4.47767	4.51572	3.72683
Inha	1000	691	363	182	22	4.3884	3.61471	2.80356
Stk11ip	1000	526	273	346	72	2.8704	2.15498	2.6809
Slc4a3	1000	497	276	265	24	3.85826	3.1765	3.25257
Sgpp2	1000	99	70	26	45	1.1361	0.885346	0.0248617
Mogat1	1000	29	10	9	52	-0.365478	-0.98073	-0.854881
Utp14b	1000	737	510	524	35	4.08885	3.72544	3.92041
Acsl3	1000	737	510	524	35	4.08885	3.72544	3.92041
Kcne4	1000	24	10	16	32	-0.0645409	-0.537172	-0.086555
Mrpl44	1000	273	237	88	62	2.12953	2.12252	1.03273
9430031J16Rik	1000	61	147	256	50	0.4502	1.70626	2.62503
Rhbdd1	1000	826	554	491	69	3.55385	3.18089	3.21062
Col4a3	1000	52	24	17	23	0.976207	0.339258	0.190292
Mff	1000	540	382	196	67	2.98797	2.69421	1.98261
Agfg1	1000	695	408	279	52	3.61637	3.04675	2.70583
Ccl20	1000	23	7	10	20	0.278934	-0.363027	-0.0670367
Wdr69	1000	22	10	13	31	-0.11043	-0.510971	-0.20452
Fbxo36	1000	2170	1340	743	55	5.17771	4.6678	4.01642
Gm7609	1000	1	1	0	0	0.0874628	0.0874628	0
Sp140	1000	5	5	2	5	0.0677984	0.11469	-0.0634384
Sp100	1000	1	0	1	0	0.0874628	0	0.0874628
Cab39	1000	456	361	128	43	3.21847	3.06021	1.84228
Itm2c	1000	345	244	210	40	2.90227	2.59069	2.55439
4933407L21Rik	1000	100	106	440	50	1.04139	1.28827	3.37046
Spata3	1000	19	12	20	32	-0.257186	-0.430257	0.08337
2810459M11Rik	1000	72	35	182	73	0.232059	-0.362536	1.79612
Psmd1	1000	916	762	507	67	3.73322	3.66121	3.28536
Armc9	1000	250	217	252	48	2.28062	2.26148	2.6409
B3gnt7	1000	101	34	55	42	1.22934	0.167486	0.842431
C130036L24Rik	1000	2564	1320	750	23	6.2219	5.40103	4.7271
1700019O17Rik	1000	45	59	34	32	0.544268	0.991207	0.557301
Ptma	1000	2511	1727	964	18	6.37108	5.94857	5.22994
Cops7b	1000	165	162	100	44	1.81289	1.95601	1.51029
Dis3l2	1000	541	453	360	46	3.39006	3.31163	3.16763
Akp3	1000	29	13	23	34	0.0507527	-0.430648	0.15191
Chrnd	1000	16	11	10	36	-0.493738	-0.583017	-0.478511
Chrng	1000	45	18	6	21	0.888487	0.168131	-0.337502
Eif4e2	1000	957	637	372	49	4.13052	3.72822	3.15598
Efhd1	1000	43	43	29	42	0.241618	0.406273	0.184537
Gigyf2	1000	581	496	208	33	3.80754	3.73665	2.69714
3110079O15Rik	1000	22	13	11	20	0.241459	-0.0286076	-0.0125889
Neu2	1000	20	39	26	25	-0.00718562	0.738016	0.483226
Inpp5d	1000	40	15	18	32	0.420886	-0.283416	0.000907861
Atg16l1	1000	496	467	276	50	3.18341	3.27341	2.72739
Scarna6	1000	25	23	17	31	-0.000805316	0.073992	-0.0181067
Sag	1000	28	14	13	30	0.129745	-0.277833	-0.180058
Dgkd	1000	352	208	109	51	2.68646	2.14541	1.48509
Ugt1a10	1000	27	16	17	54	-0.470692	-0.718858	-0.489758
Ugt1a9	1000	36	17	9	25	0.523329	0.00105029	-0.265235
Ugt1a7c	1000	16	7	10	16	0.146252	-0.224074	0.0572008
Ugt1a6b	1000	26	17	23	31	0.0339601	-0.167016	0.222901
Ugt1a6a	1000	27	22	44	27	0.186174	0.146359	0.94483
Ugt1a5	1000	28	10	10	37	-0.0599226	-0.661485	-0.500715
Ugt1a2	1000	37	27	17	17	0.83445	0.642616	0.369079
Ugt1a1	1000	20	27	13	42	-0.4711	-0.0501057	-0.449336
Heatr7b1	1000	31	19	12	57	-0.399836	-0.644324	-0.778341
Trpm8	1000	25	18	31	63	-0.705368	-0.789778	-0.128978
Spp2	1000	70	97	155	60	0.416573	0.993825	1.78239
Sh3bp4	1000	988	610	341	42	4.33052	3.81365	3.17246
Agap1	1000	1208	678	235	28	4.98681	4.30897	2.98371
Cxcr7	1000	411	167	135	58	2.76501	1.7243	1.63593
Cops8	1000	399	306	170	54	2.80001	2.61206	2.00501
Mlph	1000	44	14	39	26	0.697946	-0.165859	0.845541
Prlh	1000	25	15	19	21	0.315302	0.0348645	0.33235
Lrrfip1	1000	175	171	255	27	2.33734	2.44533	3.12009
Rbm44	1000	18	8	5	16	0.233715	-0.162674	-0.250921
Ramp1	1000	46	19	49	34	0.513096	-0.159346	0.888875
Ube2f	1000	431	389	339	50	2.98754	3.01931	3.00924
Scly	1000	132	75	77	58	1.23637	0.71639	0.936683
Espnl	1000	61	46	20	28	0.996208	0.824373	0.182091
Klhl30	1000	45	11	14	27	0.690647	-0.346681	-0.0551703
Fam132b	1000	61	20	25	35	0.799127	-0.143552	0.201151
Traf3ip1	1000	176	151	116	31	2.22661	2.17229	1.98189
Asb1	1000	175	213	215	42	1.9364	2.36283	2.54443
Twist2	1000	109	61	17	23	1.85453	1.28412	0.190292
Olfr1413	1000	12	15	6	37	-0.711999	-0.407728	-0.741723
Olfr1412	1000	18	14	7	24	-0.057096	-0.106435	-0.358296
Olfr1411	1000	14	11	5	24	-0.237668	-0.258438	-0.489541
Olfr1410	1000	19	14	19	20	0.122814	0.020302	0.361807
Olfr12	1000	21	14	13	17	0.315983	0.123242	0.182665
Gpc1	1000	1252	687	360	25	5.13123	4.41404	3.6455
Mir149	1000	53	25	109	17	1.21505	0.573903	2.29047
Dusp28	1000	395	187	216	43	3.01882	2.16713	2.53034
Rnpepl1	1000	864	487	392	18	4.84923	4.15563	3.96573
Capn10	1000	532	690	866	59	3.10653	3.65454	4.16557
Gpr35	1000	30	11	12	20	0.517093	-0.131701	0.0398785
Aqp12	1000	23	6	7	20	0.278934	-0.427157	-0.243914
Agxt	1000	35	26	10	44	-0.0145335	-0.127405	-0.647247
Sned1	1000	104	38	64	38	1.36237	0.369336	1.09891
Ppp1r7	1000	691	530	243	40	3.87199	3.66108	2.75102
Ano7	1000	38	30	20	26	0.545943	0.450812	0.234106
2015-09-02	1000	1543	1304	928	48	4.83175	4.76362	4.45746
Farp2	1000	186	125	107	38	2.11369	1.754	1.71949
Bok	1000	146	81	57	51	1.50275	0.937964	0.709126
Atg4b	1000	1239	981	489	24	5.14891	4.94812	4.09828
Ing5	1000	1283	756	500	54	4.44623	3.8736	3.47708
D2hgdh	1000	330	308	480	79	2.11689	2.21792	3.03809
Gal3st2	1000	0	0	0	0	0	0	0
Gm6086	1000	5	4	8	7	-0.0439997	-0.0533391	0.267888
Neu4	1000	26	18	23	30	0.0626304	-0.097261	0.247363
Fam174a	1000	383	274	156	64	2.56001	2.2861	1.72701
Gin1	1000	700	720	497	23	4.37256	4.54089	4.14871
Slco6d1	1000	8	3	12	45	-1.12443	-1.29299	-0.560101
Cntnap5b	1000	20	16	81	22	0.0927597	0.0486516	1.77411
Cdh20	1000	59	55	86	46	0.497344	0.587938	1.28547
2310035C23Rik	1000	393	403	281	50	2.85937	3.06834	2.75189
Tnfrsf11a	1000	66	35	40	37	0.838198	0.310501	0.606201
Zcchc2	1000	500	317	263	39	3.44197	2.97058	2.87956
Phlpp1	1000	1064	786	437	55	4.16045	3.91012	3.27183
Serpinb5	1000	25	11	12	48	-0.417107	-0.847816	-0.617833
Serpinb12	1000	30	18	23	45	-0.185827	-0.453456	-0.0820535
Serpinb13	1000	24	9	14	34	-0.119172	-0.644773	-0.226602
Serpinb11	1000	26	13	11	26	0.183373	-0.214769	-0.180932
Serpinb7	1000	16	10	8	43	-0.664175	-0.797769	-0.74268
Serpinb2	1000	13	14	15	49	-0.937794	-0.715833	-0.489733
Serpinb10-ps	1000	36	52	13	47	-0.0527886	0.505062	-0.548218
Serpinb8	1000	61	27	31	55	0.350418	-0.311075	0.00305013
Cdh7	1000	100	180	226	29	1.55755	2.45718	2.90571
Cntnap5a	1000	14	30	122	31	-0.451467	0.312152	2.04602
Mki67ip	1000	260	144	123	58	2.13544	1.53052	1.51647
Clasp1	1000	534	465	312	54	3.20633	3.19103	2.8234
Tcfcp2l1	1000	56	26	27	41	0.552427	-0.0618787	0.139565
Tmem185b	1000	768	599	480	30	4.28502	4.07972	3.91616
Sctr	1000	34	45	19	43	-0.0203187	0.432528	-0.19836
3110009E18Rik	1000	618	409	713	42	3.66731	3.25495	4.20246
C1ql2	1000	40	17	25	42	0.16633	-0.431976	0.0502354
En1	1000	43	49	33	37	0.363289	0.660443	0.413556
Ccdc93	1000	152	106	58	64	1.31208	1.03693	0.510201
Slc35f5	1000	625	498	874	41	3.70668	3.55143	4.51096
Gpr39	1000	83	43	78	29	1.32892	0.725108	1.54143
Mgat5	1000	306	413	278	48	2.55626	3.14213	2.77448
Acmsd	1000	7	14	12	26	-0.685382	-0.165859	-0.128464
Ccnt2	1000	758	787	514	56	3.66067	3.89367	3.48113
Rab3gap1	1000	152	120	158	41	1.77482	1.63327	2.15624
R3hdm1	1000	755	601	585	58	3.6175	3.47772	3.62875
Mir128-1	1000	15	10	8	51	-0.882907	-0.96151	-0.895736
Ubxn4	1000	310	239	181	63	2.28581	2.11711	1.93848
Thsd7b	1000	44	67	83	27	0.6668	1.27347	1.6673
Yod1	1000	1000	818	468	35	4.52103	4.39043	3.76246
AA986860	1000	30	23	35	29	0.223127	0.127868	0.659271
Fcamr	1000	33	15	10	31	0.256353	-0.257214	-0.362061
Pigr	1000	35	24	31	26	0.463481	0.249178	0.61877
Faim3	1000	21	21	22	18	0.277325	0.390669	0.541233
Il10	1000	43	20	25	45	0.173254	-0.370994	-0.0099037
Lgtn	1000	107	75	110	57	0.988089	0.734187	1.39158
Fam72a	1000	523	304	170	71	2.87819	2.31716	1.73464
Avpr1b	1000	32	22	14	27	0.344872	0.146359	-0.0551703
Ctse	1000	13	7	13	40	-0.7356	-0.908114	-0.407803
5430435G22Rik	1000	27	11	23	28	0.155686	-0.374936	0.297568
Slc26a9	1000	30	18	21	20	0.517093	0.200874	0.441977
Pm20d1	1000	47	12	22	35	0.50962	-0.506122	0.0915266
Slc41a1	1000	621	356	409	43	3.65097	3.04095	3.40368
Rab7l1	1000	46	18	30	79	-0.363542	-1.03447	-0.392549
Nucks1	1000	1124	853	476	67	4.02385	3.8208	3.1972
Slc45a3	1000	347	91	38	29	3.20339	1.58393	0.741733
Elk4	1000	1331	915	659	52	4.5382	4.18147	3.90001
Lemd1	1000	1058	1840	520	36	4.57504	5.52008	3.88714
Mir135b	1000	70	37	38	31	1.06791	0.51651	0.692387
Klhdc8a	1000	184	133	82	54	1.7469	1.50031	1.08056
Nuak2	1000	544	272	84	73	2.90191	2.13496	0.810619
Dstyk	1000	336	277	220	81	2.11279	2.04497	1.93993
Rbbp5	1000	525	626	456	66	2.96523	3.40004	3.15252
Tmem81	1000	41	21	25	63	-0.23003	-0.667787	-0.326015
Lrrn2	1000	127	131	243	48	1.38521	1.59697	2.59162
Pik3c2b	1000	566	636	321	41	3.56738	3.89453	3.1099
Ppp1r15b	1000	745	731	516	72	3.36001	3.52502	3.23633
Plekha6	1000	166	256	111	48	1.73314	2.48476	1.5635
Golt1a	1000	88	34	26	21	1.65819	0.724524	0.595384
Kiss1	1000	23	24	39	26	0.0764581	0.249178	0.845541
Ren2	1000	36	31	29	28	0.429861	0.424766	0.504019
Ren1	1000	37	32	34	30	0.398233	0.400239	0.605817
Etnk2	1000	134	160	206	57	1.27439	1.68582	2.20872
Fmod	1000	37	32	40	36	0.234182	0.247058	0.628404
Chit1	1000	27	23	21	46	-0.30521	-0.276407	-0.177504
Chi3l1	1000	35	17	53	29	0.37199	-0.11314	1.09537
Mybph	1000	70	50	44	27	1.18617	0.942825	0.94483
Myog	1000	91	45	21	23	1.63021	0.948067	0.355352
4933406M09Rik	1000	30	13	9	27	0.283472	-0.243588	-0.318205
Cyb5r1	1000	233	116	63	27	2.71991	1.94283	1.34172
Adipor1	1000	1032	570	378	48	4.25876	3.59205	3.19686
Klhl12	1000	461	322	257	57	2.94342	2.62727	2.50706
Rabif	1000	513	475	432	76	2.77386	2.86048	2.93209
Kdm5b	1000	592	390	218	70	3.06795	2.67591	2.08042
Syt2	1000	114	55	88	28	1.75179	1.01992	1.71261
Ube2t	1000	221	74	32	36	2.395	1.15395	0.406011
Ptpn7	1000	63	17	22	22	1.22662	0.0930457	0.422127
Arl8a	1000	441	425	532	48	3.06139	3.18193	3.67284
Lmod1	1000	84	62	58	34	1.20276	0.996773	1.07596
Csrp1	1000	335	166	119	29	3.15489	2.35026	2.06366
Phlda3	1000	949	630	325	35	4.44673	4.02191	3.25723
Tnni1	1000	47	27	26	35	0.50962	0.112787	0.235917
Lad1	1000	132	68	40	28	1.93887	1.26249	0.819521
Tnnt2	1000	34	43	34	35	0.176197	0.569166	0.487455
Tmem9	1000	40	13	23	59	-0.184149	-0.951004	-0.33366
Cacna1s	1000	50	52	68	37	0.52504	0.725538	1.19116
Kif21b	1000	277	387	351	50	2.37817	3.01217	3.0572
Ddx59	1000	856	528	381	47	4.01496	3.50506	3.2268
Kif14	1000	35	27	21	50	-0.144162	-0.216205	-0.252978
Zfp281	1000	399	188	243	65	2.59962	1.76223	2.30204
Mir181a-1	1000	36	18	103	62	-0.344955	-0.773014	1.22711
Mir181b-1	1000	44	29	152	59	-0.0846135	-0.317132	1.77325
Atp6v1g3	1000	34	12	28	37	0.124502	-0.55457	0.258277
Dennd1b	1000	654	281	361	30	4.05833	3.0296	3.52038
Zbtb41	1000	1091	814	473	49	4.31666	4.07424	3.48976
Aspm	1000	442	176	80	64	2.75897	1.69115	0.88571
F13b	1000	17	21	8	51	-0.792709	-0.452496	-0.895736
Kcnt2	1000	96	103	110	34	1.36625	1.60619	1.84379
B3galt2	1000	169	265	297	83	1.1564	1.9573	2.32119
Glrx2	1000	97	92	152	58	0.847095	0.963483	1.78984
Uchl5	1000	602	467	314	25	4.09435	3.87254	3.45723
Fam5c	1000	26	16	39	52	-0.465014	-0.681169	0.282622
Ptgs2	1000	59	25	54	63	0.165899	-0.519689	0.445716
Pdc	1000	16	15	17	70	-1.17997	-1.03523	-0.745549
Tpr	1000	435	385	546	75	2.55886	2.58292	3.27303
Ivns1abp	1000	985	638	441	42	4.3262	3.87678	3.52873
1190005F20Rik	1000	808	759	417	46	3.95503	4.03624	3.37127
Fam129a	1000	76	50	26	27	1.28347	0.942825	0.430256
Edem3	1000	500	419	351	44	3.32427	3.24515	3.17195
Glt25d2	1000	91	54	55	38	1.19694	0.743731	0.926726
Apobec4	1000	29	19	24	58	-0.481231	-0.662122	-0.280548
Arpc5	1000	279	245	134	23	3.09332	3.04524	2.37472
Ncf2	1000	37	29	17	35	0.260261	0.178376	-0.112007
Nmnat2	1000	38	180	324	67	-0.376079	1.6723	2.66408
1700012A16Rik	1000	115	74	73	36	1.53968	1.15395	1.29678
Rgs8	1000	84	126	64	32	1.25739	1.91214	1.23537
Rgs16	1000	132	68	54	44	1.52249	0.872595	0.781596
Rnasel	1000	144	142	146	49	1.52615	1.68106	1.89592
Gm5531	1000	17	16	12	44	-0.642565	-0.519722	-0.540332
Teddm1	1000	25	14	19	42	-0.283473	-0.56948	-0.178034
Glul	1000	843	798	547	46	4.01504	4.10708	3.75003
Stx6	1000	466	339	193	56	2.97737	2.71609	2.13864
Acbd6	1000	358	208	181	53	2.66961	2.10722	2.1055
Tor1aip2	1000	1039	581	323	53	4.16575	3.52145	2.88859
Nphs2	1000	19	15	11	35	-0.338376	-0.359281	-0.401513
Abl2	1000	903	608	328	42	4.2029	3.80903	3.11895
Angptl1	1000	164	79	61	49	1.69608	0.947132	0.822857
2810025M15Rik	1000	1639	1374	519	35	5.22496	5.12739	3.90699
BC026585	1000	457	315	18	46	3.15422	2.80888	-0.299495
Sec16b	1000	41	66	35	51	-0.00421295	0.695603	0.191727
Astn1	1000	110	313	330	34	1.53618	3.07331	3.30114
Mir488	1000	26	21	24	50	-0.42427	-0.433016	-0.140503
Rfwd2	1000	725	624	503	47	3.7801	3.73953	3.61339
Scarna3a	1000	24	33	8	66	-0.792325	-0.311683	-1.14516
Tnr	1000	22	54	53	58	-0.725156	0.337878	0.506049
4930523C07Rik	1000	55	36	18	27	0.909657	0.598871	0.125402
Mrps14	1000	213	257	212	38	2.29468	2.70721	2.60987
Rc3h1	1000	616	358	208	36	3.81004	3.20899	2.6284
Serpinc1	1000	21	11	17	33	-0.20459	-0.508459	-0.0658206
Gas5	1000	1479	1063	801	43	4.88175	4.57727	4.34655
Snord47	1000	49	37	30	54	0.125411	0.00906221	-0.0105901
Cenpl	1000	305	238	168	64	2.24619	2.09487	1.82431
Ankrd45	1000	37	18	27	44	0.0409616	-0.432259	0.0785782
Tnfsf4	1000	18	24	14	46	-0.644012	-0.239881	-0.480067
Tnfsf18	1000	33	15	27	51	-0.222393	-0.707753	-0.0544337
Pigc	1000	191	171	131	58	1.7204	1.75549	1.5972
Dnm3os	1000	74	95	87	44	0.804894	1.27469	1.33881
Mir199a-2	1000	94	138	117	41	1.16386	1.81259	1.76858
Mir214	1000	31	26	23	61	-0.473065	-0.451199	-0.366273
Vamp4	1000	1326	804	638	44	4.70321	4.15976	4.00546
Myoc	1000	32	24	19	38	0.0404393	-0.0636236	-0.0937379
Kifap3	1000	209	293	159	67	1.68281	2.32905	1.7059
Scyl3	1000	861	692	382	37	4.25708	4.10568	3.43547
2810422O20Rik	1000	417	214	186	59	2.76672	2.0365	2.03915
Sele	1000	46	16	11	49	0.158421	-0.622723	-0.689042
Sell	1000	25	12	31	33	-0.0564913	-0.455991	0.444374
Selp	1000	29	24	12	43	-0.172322	-0.176281	-0.520288
F5	1000	43	21	20	22	0.805478	0.258105	0.344124
Slc19a2	1000	455	311	311	36	3.38584	3.01524	3.1742
4930455F23Rik	1000	97	189	99	75	0.562051	1.61494	0.984096
Nme7	1000	332	289	352	51	2.60584	2.59072	3.04286
Dpt	1000	29	22	38	39	-0.0774075	-0.16087	0.510326
Gpr161	1000	22	8	13	35	-0.219732	-0.728515	-0.29842
Brp44	1000	764	519	578	52	3.75	3.38223	3.71558
Adcy10	1000	27	16	10	48	-0.348394	-0.602703	-0.724748
Creg1	1000	120	69	79	67	0.956496	0.466979	0.824545
Cd247	1000	40	34	30	57	-0.14707	-0.129751	-0.0621338
Gpa33	1000	64	32	31	40	0.728347	0.153287	0.288805
Ildr2	1000	255	87	65	49	2.28637	1.06378	0.89592
Tada1	1000	401	302	192	66	2.58965	2.38649	1.97032
Fam78b	1000	623	760	385	14	4.54881	4.92712	4.0706
Tmco1	1000	1202	950	514	24	5.10574	4.90255	4.16799
Aldh9a1	1000	171	104	213	17	2.65342	2.12324	3.16389
Rxrg	1000	68	71	70	51	0.555214	0.780994	0.945566
Lmx1a	1000	105	34	36	27	1.67877	0.542287	0.738379
Rgs5	1000	36	32	21	37	0.181085	0.223038	0.00829908
1700084C01Rik	1000	32	22	136	30	0.255275	0.0632036	2.20989
Sh2d1b2	1000	14	8	5	19	-0.0628867	-0.268122	-0.345088
Sh2d1b1	1000	7	8	6	13	-0.204003	-0.0489053	-0.0830624
1700015E13Rik	1000	27	19	23	43	-0.23791	-0.368926	-0.0422406
Olfml2b	1000	104	114	51	44	1.21993	1.50265	0.718403
Fcgr4	1000	20	17	20	27	-0.0701654	-0.0571746	0.207864
1700009P17Rik	1000	53	36	27	46	0.377049	0.138631	0.0393071
Mpz	1000	523	598	589	58	3.10106	3.47069	3.63832
Nr1i3	1000	17	9	9	39	-0.524866	-0.764942	-0.600705
Apoa2	1000	38	18	18	28	0.484309	-0.0423602	0.0996288
Adamts4	1000	44	47	66	44	0.219932	0.457558	1.00987
B4galt3	1000	229	175	191	63	1.87372	1.70019	2.00992
Dedd	1000	1397	1073	661	54	4.56759	4.36993	3.86886
Pfdn2	1000	452	387	390	65	2.77302	2.74444	2.95057
Pvrl4	1000	31	9	7	32	0.16812	-0.593756	-0.562993
Arhgap30	1000	34	18	8	31	0.285499	-0.123947	-0.477538
Usf1	1000	1916	1737	861	37	5.39653	5.41369	4.57528
Tstd1	1000	38	15	20	21	0.712638	0.0348645	0.372992
F11r	1000	220	75	49	46	2.15117	0.945985	0.63541
Refbp2	1000	469	527	350	69	2.75802	3.11088	2.74048
Cd244	1000	57	26	22	66	0.0755711	-0.534076	-0.482193
Cd48	1000	26	13	8	31	0.0339601	-0.353429	-0.477538
Slamf1	1000	34	15	8	35	0.176197	-0.359281	-0.571438
Cd84	1000	19	20	5	48	-0.645376	-0.432778	-1.03287
Slamf6	1000	34	9	5	20	0.637388	-0.242732	-0.375159
Copa	1000	472	567	440	75	2.67261	3.12282	2.9715
Pex19	1000	227	155	146	53	2.04753	1.71772	1.8233
Dcaf8	1000	821	446	339	59	3.71758	3.04276	2.85261
Igsf8	1000	520	265	227	23	3.95483	3.15176	3.07071
Kcnj10	1000	180	63	60	38	2.07019	0.918229	1.02491
Pigm	1000	430	347	166	41	3.1834	3.04963	2.22109
Slamf9	1000	41	31	26	36	0.339152	0.216684	0.213366
Igsf9	1000	242	145	74	24	2.86667	2.31759	1.60999
Tagln2	1000	164	120	76	40	1.89827	1.65579	1.25778
Ccdc19	1000	109	50	66	69	0.801961	0.0704679	0.582333
Vsig8	1000	36	14	9	24	0.555881	-0.106435	-0.238002
Crp	1000	108	138	33	55	1.03783	1.52945	0.0631711
Olfr16	1000	44	22	12	61	-0.120763	-0.595589	-0.84432
Olfr218	1000	22	11	8	71	-0.94802	-1.24988	-1.21956
Olfr1404	1000	11	11	6	24	-0.389671	-0.258438	-0.422427
Olfr418-ps1	1000	18	13	15	37	-0.431891	-0.503944	-0.246958
Aim2	1000	46	22	10	44	0.267237	-0.271795	-0.647247
Pyhin1	1000	5	6	3	15	-0.420584	-0.25127	-0.362505
Pydc3	1000	16	6	5	16	0.146252	-0.288204	-0.250921
Olfr433	1000	10	12	15	31	-0.657918	-0.404055	-0.108304
Olfr432	1000	19	7	7	28	-0.141295	-0.606261	-0.464272
Olfr430	1000	23	14	1	46	-0.446073	-0.654919	-1.29949
Olfr429	1000	8	19	5	45	-1.12443	-0.411636	-0.975138
Olfr427	1000	5	11	3	30	-0.93737	-0.429836	-0.790111
Olfr424	1000	14	15	4	46	-0.824584	-0.607613	-1.06503
Olfr421	1000	17	9	7	53	-0.832886	-1.05628	-0.992991
Olfr420	1000	18	11	10	54	-0.809493	-0.963971	-0.833712
Spna1	1000	59	65	31	41	0.611321	0.885654	0.267889
1810030J14Rik	1000	7	8	4	38	-1.02096	-0.800589	-0.901093
Olfr417	1000	18	17	6	44	-0.599496	-0.475328	-0.888255
Olfr248	1000	13	12	8	57	-1.09644	-0.966252	-1.00073
Olfr414	1000	31	25	11	45	-0.1548	-0.183367	-0.612568
Olfr220	1000	22	18	7	69	-0.915896	-0.886463	-1.25166
Fmn2	1000	571	475	172	50	3.38063	3.29711	2.09216
Kmo	1000	23	17	20	61	-0.742252	-0.799123	-0.48175
Wdr64	1000	11	15	15	39	-0.814373	-0.454602	-0.290365
Exo1	1000	713	673	508	60	3.50008	3.60201	3.39796
Sdccag8	1000	780	719	668	55	3.72026	3.78426	3.86631
Zfp238	1000	722	472	116	52	3.67015	3.24957	1.54566
1700016C15Rik	1000	61	40	105	42	0.625761	0.330984	1.61155
Gm16432	1000	6	7	4	21	-0.582818	-0.39577	-0.475005
Pppde1	1000	80	48	72	40	0.991382	0.568324	1.19365
Fam36a	1000	3731	4011	2349	36	6.37778	6.63759	6.02867
Efcab2	1000	1587	1466	622	52	4.78923	4.85216	3.81868
Kif26b	1000	324	672	837	20	3.40292	4.53968	4.96893
Cnst	1000	561	504	326	25	3.99532	3.97902	3.50876
Sccpdh	1000	537	417	195	37	3.59178	3.3963	2.51994
Cdc42bpa	1000	526	387	199	77	2.79391	2.56112	1.85918
Itpkb	1000	53	59	75	55	0.192156	0.491479	0.956256
Parp1	1000	553	463	246	54	3.25533	3.18502	2.49927
Lin9	1000	2353	1199	253	16	6.35631	5.4991	3.42822
Acbd3	1000	867	606	348	37	4.26692	3.91885	3.30664
BC031781	1000	957	884	1175	37	4.40694	4.45186	5.0168
Lefty2	1000	50	34	24	31	0.686037	0.432446	0.259427
Pycr2	1000	414	205	198	53	2.87091	2.08777	2.22491
Lefty1	1000	52	39	34	33	0.67342	0.518014	0.533642
Tmem63a	1000	268	137	114	28	2.87917	2.12756	2.03453
9130409I23Rik	1000	20	11	10	36	-0.323813	-0.583017	-0.478511
Cnih4	1000	301	295	131	60	2.29865	2.45442	1.56421
Cnih3	1000	214	74	84	48	2.07083	0.88915	1.21867
Srp9	1000	81	67	43	64	0.519678	0.481228	0.183391
1700047M11Rik	1000	21	14	9	23	0.0981978	-0.0757793	-0.210246
Trp53bp2	1000	1580	1415	531	24	5.49569	5.46948	4.21354
Capn8	1000	40	33	27	39	0.238094	0.205912	0.181704
Susd4	1000	401	618	407	37	3.18455	3.94641	3.52336
Tlr5	1000	77	32	58	30	1.20947	0.400239	1.17141
Dusp10	1000	1190	837	571	28	4.96544	4.60658	4.20938
Rab3gap2	1000	685	502	302	45	3.74388	3.47589	2.94543
Snora36b	1000	53	18	20	25	0.931414	0.044119	0.260834
Mir664	1000	53	19	22	27	0.868434	0.0277143	0.285867
Mir194-1	1000	23	13	7	38	-0.259121	-0.527571	-0.699459
Mir215	1000	22	12	8	46	-0.483547	-0.754454	-0.801995
Bpnt1	1000	174	128	172	42	1.92883	1.69355	2.24727
Eprs	1000	741	664	578	38	4.01963	4.02384	3.9913
Slc30a10	1000	39	24	63	31	0.423002	0.110518	1.24128
5033404E19Rik	1000	34	11	58	63	-0.419064	-1.12235	0.525886
D1Pas1	1000	37	21	12	19	0.758143	0.356369	0.0699494
Gpatch2	1000	480	542	434	57	2.99977	3.35051	3.22809
Esrrg	1000	62	147	53	51	0.448299	1.68678	0.627826
Ush2a	1000	66	68	14	54	0.460596	0.673459	-0.627261
Ptpn14	1000	922	451	264	23	4.76219	3.88461	3.27518
Angel2	1000	4	7	4	34	-1.11917	-0.765068	-0.811565
A230020J21Rik	1000	104	94	91	53	1.02961	1.08122	1.22491
1700022P22Rik	1000	40	18	18	40	0.213774	-0.344213	-0.178321
Nsl1	1000	378	309	219	64	2.54182	2.45048	2.17726
Batf3	1000	258	119	78	16	3.24428	2.32918	1.91135
Tmem206	1000	297	308	187	59	2.29851	2.53086	2.04627
Ints7	1000	1251	875	257	30	4.97751	4.61456	3.05472
Lpgat1	1000	1145	707	397	38	4.63663	4.1123	3.46698
Nek2	1000	593	263	76	55	3.33393	2.38678	0.972023
Slc30a1	1000	803	412	373	18	4.74559	3.92268	3.89693
Rd3	1000	33	39	27	22	0.537545	0.830011	0.600464
Gm10516	1000	831	671	427	41	4.10872	3.96997	3.50446
Kcnh1	1000	71	45	66	39	0.873683	0.521939	1.11299
Irf6	1000	96	38	14	35	1.3397	0.44141	-0.24951
A130010J15Rik	1000	221	236	283	46	2.15727	2.41547	2.83704
Lamb3	1000	62	28	50	16	1.43165	0.711796	1.40116
Plxna2	1000	300	450	500	42	2.66276	3.38782	3.70391
Cd34	1000	32	27	15	38	0.0404393	0.040713	-0.268825
A330023F24Rik	1000	29	26	78	46	-0.239622	-0.169492	1.16763
Mir29b-2	1000	26	15	12	51	-0.444786	-0.707753	-0.673344
Mir29c	1000	18	12	21	35	-0.380197	-0.506122	0.0530525
Xkr4	1000	413	916	778	27	3.50474	4.76262	4.67093
Rp1	1000	24	7	12	39	-0.247332	-0.885236	-0.437206
Sox17	1000	89	50	124	46	0.982771	0.482585	1.74233
Mrpl15	1000	498	315	256	44	3.31867	2.85097	2.73978
Rgs20	1000	128	195	275	21	2.12768	2.80177	3.38794
Npbwr1	1000	26	14	22	42	-0.248708	-0.56948	-0.0593891
Sntg1	1000	38	58	221	30	0.4252	1.02473	2.8507
2610203C22Rik	1000	54	34	144	46	0.397808	0.082047	1.93497
Mybl1	1000	933	316	136	34	4.44916	3.08641	2.11443
Vcpip1	1000	342	296	224	54	2.58686	2.56654	2.37274
Snhg6	1000	795	545	214	50	3.84697	3.48939	2.38306
Snord87	1000	199	132	95	51	1.91109	1.5475	1.31372
Lrrc67	1000	48	30	31	50	0.183413	-0.118908	0.0921576
Cops5	1000	1807	1880	1245	44	5.14514	5.36902	4.95267
Arfgef1	1000	1660	1296	477	20	5.70434	5.47096	4.17797
Cpa6	1000	55	43	41	28	0.879169	0.75282	0.845056
Slco5a1	1000	255	722	257	43	2.41797	4.02927	2.76511
Prdm14	1000	27	10	11	29	0.125829	-0.457095	-0.258267
Ncoa2	1000	1845	819	353	34	5.42076	4.417	3.39398
Tram1	1000	469	304	192	42	3.28082	2.84556	2.39312
Lactb2	1000	350	183	212	50	2.69911	1.99415	2.37046
Gm5523	1000	55	41	40	56	0.214225	0.0773026	0.238637
Eya1	1000	320	380	155	91	1.90924	2.3478	1.34904
Msc	1000	45	52	30	41	0.313239	0.633267	0.236862
Trpa1	1000	26	25	5	29	0.091882	0.200017	-0.620837
Gm106	1000	68	24	28	51	0.555214	-0.340021	-0.0212669
Rpl7	1000	1892	1927	1190	52	5.04051	5.2429	4.73728
Stau2	1000	532	487	447	15	4.28513	4.26371	4.24444
Ube2w	1000	555	344	280	54	3.26039	2.77299	2.6753
Tceb1	1000	670	518	552	63	3.35914	3.18346	3.46618
Jph1	1000	148	74	24	16	2.5038	1.74422	0.678689
Crisp4	1000	15	11	2	36	-0.539542	-0.583017	-1.00903
Defb44-ps	1000	125	35	7	64	1.05932	-0.221386	-1.17569
Defb18	1000	13	7	7	52	-0.99935	-1.15761	-0.975175
Defb41	1000	23	20	8	66	-0.828851	-0.756468	-1.14516
Gm15386	1000	23	20	8	66	-0.828851	-0.756468	-1.14516
Pkhd1	1000	35	24	14	46	-0.0590497	-0.239881	-0.480067
Il17f	1000	28	18	14	49	-0.336343	-0.535261	-0.537039
Mcm3	1000	291	152	56	47	2.50887	1.80992	0.763726
Tram2	1000	422	385	236	35	3.30713	3.33398	2.82088
Gm4956	1000	18	9	12	51	-0.74964	-1.01809	-0.673344
Kcnq5	1000	141	107	157	25	2.11751	1.89917	2.52554
Rims1	1000	199	415	461	27	2.5081	3.64998	3.93578
4933415F23Rik	1000	38	16	21	34	0.313787	-0.288629	0.0759608
Ogfrl1	1000	235	296	192	46	2.24007	2.72359	2.31348
Smap1	1000	446	236	176	44	3.16479	2.45756	2.23728
1110058L19Rik	1000	280	161	169	78	1.90639	1.35981	1.62876
Fam135a	1000	570	489	288	23	4.0835	3.99747	3.39383
Col19a1	1000	27	13	39	56	-0.509257	-0.897606	0.212641
Bai3	1000	407	381	454	34	3.28341	3.34437	3.74302
4931408C20Rik	1000	143	104	76	190	-0.0911185	-0.273192	-0.415994
Gm597	1000	21	9	9	51	-0.62765	-1.01809	-0.836842
Phf3	1000	7	10	10	54	-1.37339	-1.01842	-0.833712
Ptp4a1	1000	909	715	916	46	4.12183	3.95192	4.47723
Gm13363	1000	1111	830	977	39	4.56901	4.31572	4.71109
4931428L18Rik	1000	12	20	21	36	-0.686383	-0.167979	0.0305022
Gm9839	1000	3	1	2	11	-0.388934	-0.465248	-0.301272
Gm5415	1000	3	5	2	9	-0.292144	-0.0743981	-0.226268
Prim2	1000	385	371	487	46	2.91598	3.03438	3.58746
Bag2	1000	496	284	208	43	3.33583	2.73061	2.47971
Zfp451	1000	1064	924	392	45	4.36743	4.3356	3.30497
Gm15455	1000	8	10	3	8	0.0958357	0.278724	-0.109248
Bend6	1000	354	245	465	22	3.45422	3.07656	4.08409
Ccdc115	1000	313	299	343	54	2.46499	2.58035	2.95369
Prss40	1000	41	22	14	25	0.655779	0.204584	-0.00220035
AA619741	1000	19	29	18	24	-0.0152758	0.478527	0.205605
Fam168b	1000	1025	607	544	58	4.05067	3.49168	3.52681
Uggt1	1000	244	216	124	45	2.31298	2.31706	1.76183
Neurl3	1000	79	41	64	28	1.29928	0.703067	1.33409
4632411B12Rik	1000	445	211	83	33	3.43458	2.5632	1.51914
Lman2l	1000	512	415	178	58	3.07131	2.96014	1.99744
Ankrd23	1000	61	24	26	14	1.49592	0.649132	0.815454
Ankrd39	1000	287	176	278	47	2.48995	2.00256	2.79347
Sema4c	1000	620	438	183	28	4.0423	3.69673	2.64879
Fam178b	1000	54	26	32	33	0.71524	0.128971	0.474748
Actr1b	1000	727	547	326	56	3.6017	3.3814	2.84913
Tmem131	1000	2106	1688	1194	34	5.61011	5.44608	5.1073
6330578E17Rik	1000	683	469	357	53	3.57187	3.2217	3.02648
Mgat4a	1000	17	17	18	39	-0.524866	-0.364404	-0.157098
4930594C11Rik	1000	29	13	18	26	0.282909	-0.214769	0.151644
2010300C02Rik	1000	127	43	54	24	2.01531	0.869317	1.24742
Tsga10	1000	388	300	350	64	2.57798	2.40997	2.81645
Mitd1	1000	136	131	126	71	1.05198	1.19491	1.34523
Lyg2	1000	29	13	9	48	-0.282805	-0.744722	-0.781332
Lyg1	1000	20	14	15	37	-0.349429	-0.455034	-0.246958
Txndc9	1000	590	487	610	37	3.72382	3.61249	4.08886
Rev1	1000	1241	705	446	19	5.32599	4.64077	4.11434
Aff3	1000	30	22	26	34	0.0824615	-0.040702	0.258825
Lonrf2	1000	21	37	29	50	-0.607134	0.0854508	0.0294218
Chst10	1000	177	200	201	61	1.5648	1.91137	2.10988
Tbc1d8	1000	230	163	139	46	2.21104	1.92201	1.88917
Snord89	1000	20	20	28	18	0.237797	0.35114	0.752737
Rnf149	1000	840	548	285	44	4.05451	3.61983	2.88593
Creg2	1000	39	55	33	32	0.394891	0.912135	0.528155
Rfx8	1000	115	77	31	31	1.67507	1.32775	0.492088
Gm3646	1000	31	21	98	49	-0.241186	-0.41327	1.38896
Mfsd9	1000	80	89	126	58	0.611879	0.922841	1.54727
2610017I09Rik	1000	1529	1526	695	25	5.41628	5.54724	4.56461
Tgfbrap1	1000	1968	1762	1004	47	5.20097	5.21364	4.58815
Fhl2	1000	246	254	168	43	2.36925	2.57861	2.19592
Uxs1	1000	534	498	242	46	3.37181	3.44382	2.62427
A530098C11Rik	1000	32	18	13	46	-0.146513	-0.474346	-0.528977
1700029F09Rik	1000	508	293	129	44	3.34646	2.75174	1.83222
Kdelc1	1000	1043	720	409	41	4.43099	4.06937	3.44462
4832428D23Rik	1000	19	16	10	46	-0.602192	-0.561809	-0.686518
Col5a2	1000	35	28	22	45	-0.0369633	-0.0814875	-0.119528
Slc40a1	1000	160	58	111	42	1.81841	0.733083	1.68137
Gm3852	1000	8	8	3	31	-0.773395	-0.626448	-0.814573
Gm4776	1000	12	10	7	29	-0.49308	-0.457095	-0.489593
Slc39a10	1000	989	705	576	33	4.55894	4.23051	4.09924
Obfc2a	1000	433	275	273	75	2.55244	2.12034	2.31353
Myo1b	1000	450	638	103	40	3.27061	3.92147	1.62903
Gls	1000	569	313	268	45	3.4829	2.82102	2.78229
Nab1	1000	262	129	185	39	2.54968	1.77111	2.40649
Mfsd6	1000	198	290	214	43	2.07729	2.75918	2.51785
Inpp1	1000	122	102	210	52	1.25119	1.20147	2.32144
1700019D03Rik	1000	150	91	86	34	1.93394	1.45284	1.53893
1700019A02Rik	1000	30	19	24	35	0.0559025	-0.184194	0.165527
Pms1	1000	824	484	201	56	3.77872	3.2102	2.19283
Asnsd1	1000	306	234	125	24	3.18636	2.95246	2.25769
Stk17b	1000	277	108	60	25	3.01765	1.91085	1.33884
Hecw2	1000	334	417	419	50	2.63462	3.11575	3.30244
Gtf3c3	1000	154	139	72	65	1.31205	1.36593	0.744663
Pgap1	1000	188	230	333	57	1.718	2.16891	2.86139
Ankrd44	1000	300	314	353	34	2.86268	3.07769	3.39398
Sf3b1	1000	704	568	241	50	3.67527	3.54735	2.54319
Hspd1	1000	1585	1070	483	27	5.40467	4.98324	4.00084
Rftn2	1000	27	14	37	30	0.0965777	-0.277833	0.689882
Boll	1000	82	31	10	19	1.64493	0.701504	-0.0369659
Hsfy2	1000	21	19	15	62	-0.835941	-0.731194	-0.713513
Satb2	1000	109	95	136	20	1.95932	1.90783	2.48045
1110034B05Rik	1000	1664	1211	592	51	4.87714	4.59897	3.76723
Kctd18	1000	578	488	223	41	3.59682	3.52308	2.61417
Clk1	1000	647	476	394	35	3.90521	3.62904	3.52308
Ppil3	1000	341	341	340	56	2.54426	2.72419	2.90702
Orc2	1000	503	356	155	67	2.88862	2.59675	1.67254
Fam126b	1000	583	668	479	69	3.06259	3.44393	3.17607
Als2cr12	1000	15	11	2	21	-0.0880537	-0.164444	-0.627008
Trak2	1000	1013	741	388	41	4.38953	4.10995	3.37151
Als2cr11	1000	26	17	9	38	-0.152206	-0.341158	-0.579165
Als2cr4	1000	1404	1428	724	43	4.8075	4.99765	4.20374
Mpp4	1000	19	31	15	34	-0.311817	0.265959	-0.179296
Als2	1000	450	318	441	59	2.87268	2.57472	3.21699
Sumo1	1000	896	738	503	62	3.7875	3.69794	3.35188
Ica1l	1000	130	93	95	42	1.5488	1.29181	1.4871
Wdr12	1000	1700	1387	679	64	4.6646	4.56049	3.74162
Raph1	1000	464	577	414	42	3.26587	3.73552	3.44088
Ino80d	1000	1470	892	600	42	4.89619	4.35018	3.95947
Ndufs1	1000	1267	1136	661	43	4.66113	4.67172	4.07537
Gpr1	1000	68	122	108	64	0.312083	1.21471	1.25494
Dytn	1000	15	17	8	30	-0.375491	-0.14033	-0.453076
Mdh1b	1000	255	176	198	74	1.83932	1.53514	1.89408
Klf7	1000	3757	3509	2079	24	6.73694	6.77008	6.15088
Fam119a	1000	1482	1162	701	34	5.10772	4.91349	4.35234
Fzd5	1000	280	89	129	36	2.71571	1.37634	2.00096
Plekhm3	1000	336	459	215	73	2.23206	2.85682	2.01851
4921521F21Rik	1000	23	23	12	53	-0.591878	-0.414735	-0.709198
Cryge	1000	101	25	13	33	1.45632	0.0942058	-0.252234
Crygd	1000	65	23	21	47	0.586622	-0.296999	-0.196746
Crygc	1000	62	31	20	35	0.817743	0.241112	0.0135241
Crygb	1000	11	9	11	26	-0.454057	-0.428894	-0.180932
Cryga	1000	40	10	11	9	1.26728	0.233724	0.358695
D630023F18Rik	1000	32	29	33	48	-0.189696	-0.11085	0.189522
Idh1	1000	561	679	448	58	3.19934	3.64946	3.25551
1110028C15Rik	1000	749	643	328	30	4.24963	4.17941	3.38823
Acadl	1000	155	114	87	28	2.14727	1.89254	1.69867
Myl1	1000	21	21	9	29	-0.090982	0.0519188	-0.369299
Lancl1	1000	282	198	117	41	2.60167	2.28727	1.76858
Erbb4	1000	165	324	212	50	1.68326	2.76692	2.37046
Ikzf2	1000	119	57	94	55	1.16045	0.452485	1.22982
Bard1	1000	423	220	94	46	3.0466	2.32083	1.3944
Abca12	1000	40	46	13	44	0.120396	0.434474	-0.489706
Fn1	1000	545	295	148	34	3.69076	2.99214	2.22406
Mreg	1000	252	106	55	54	2.16913	1.21188	0.615595
Pecr	1000	97	158	210	48	1.04552	1.84024	2.39499
2015-03-04	1000	193	661	398	42	2.06633	3.92664	3.38617
Ankar	1000	25	17	7	29	0.0571166	-0.11314	-0.489593
Igfbp5	1000	75	51	223	54	0.610838	0.347231	2.36671
Tnp1	1000	30	24	15	29	0.223127	0.164394	-0.0589585
Pinc	1000	45	32	18	44	0.243778	0.0652403	-0.260224
Tns1	1000	119	133	77	27	1.83673	2.1176	1.5771
Cxcr1	1000	25	9	15	34	-0.0835484	-0.644773	-0.179296
Aamp	1000	271	325	300	45	2.45552	2.87271	2.93633
Tmbim1	1000	168	102	82	61	1.49591	1.03913	0.963034
Usp37	1000	76	76	134	50	0.706975	0.881092	1.76639
Zfp142	1000	293	282	287	49	2.47569	2.59645	2.79924
Rnf25	1000	191	222	207	58	1.7204	2.10341	2.19842
Prkag3	1000	53	25	19	30	0.778837	0.172828	0.0912443
Fev	1000	42	25	17	24	0.713422	0.344226	0.162536
Cryba2	1000	25	24	14	38	-0.186971	-0.0636236	-0.31613
Mir375	1000	117	46	26	33	1.64124	0.69085	0.282103
Ccdc108	1000	25	23	6	87	-1.07249	-0.944886	-1.56026
Ihh	1000	198	54	61	30	2.41178	0.944559	1.22875
Nhej1	1000	846	483	304	51	3.91444	3.30095	2.84123
Slc23a3	1000	24	38	22	23	0.210673	0.772218	0.393826
1810031K17Rik	1000	1670	1243	786	45	5.01	4.75714	4.28
Abcb6	1000	320	165	83	31	3.03396	2.28844	1.56686
Atg9a	1000	497	467	478	35	3.53516	3.6024	3.79197
Glb1l	1000	544	355	243	43	3.46511	3.03707	2.68917
Tuba4a	1000	116	56	115	49	1.24862	0.547202	1.58949
Ptprn	1000	44	110	198	47	0.153662	1.39488	2.33527
Resp18	1000	31	43	46	42	-0.0864364	0.406273	0.64688
Dnpep	1000	1067	735	450	38	4.53629	4.16712	3.64117
Chpf	1000	315	430	384	22	3.29352	3.84955	3.81806
Obsl1	1000	745	389	190	22	4.49459	3.71043	2.8607
Epha4	1000	264	344	331	32	2.74281	3.25424	3.35224
Pax3	1000	566	549	191	47	3.43165	3.55971	2.28729
Farsb	1000	790	934	653	54	3.75768	4.17293	3.85171
Scg2	1000	32	80	102	43	-0.0792124	1.08675	1.555
Ap1s3	1000	139	47	55	29	1.97569	0.819745	1.13659
Wdfy1	1000	293	323	207	61	2.24381	2.56162	2.14922
Serpine2	1000	335	214	277	30	3.12564	2.66077	3.15672
Fam124b	1000	45	19	37	45	0.221349	-0.411636	0.360465
Cul3	1000	1322	749	359	11	5.749	5.0266	4.07955
Dock10	1000	75	60	125	35	1.04014	0.93445	1.98315
Irs1	1000	1118	848	805	20	5.14074	4.8683	4.91376
Col4a4	1000	59	36	19	17	1.33535	0.916791	0.453967
Tm4sf20	1000	32	22	14	40	-0.00861846	-0.183748	-0.358894
Slc19a3	1000	42	40	16	51	0.020878	0.145406	-0.480698
Sphkap	1000	51	25	49	45	0.356701	-0.183367	0.654912
Pid1	1000	165	487	199	39	1.93059	3.56562	2.50363
Dner	1000	78	241	243	49	0.758814	2.3829	2.57288
Trip12	1000	2052	1337	724	61	4.98637	4.55843	3.87971
Slc16a14	1000	58	111	336	40	0.615872	1.55701	3.19365
A530032D15Rik	1000	0	1	6	6	-0.381501	-0.23981	0.183606
C130026I21Rik	1000	5	3	2	10	-0.196961	-0.262426	-0.264257
Sp110	1000	8	6	4	21	-0.457287	-0.4599	-0.475005
A630001G21Rik	1000	41	24	22	40	0.239309	-0.109748	-0.0178568
Gpr55	1000	30	36	19	27	0.283472	0.598871	0.167222
Htr2b	1000	50	39	38	51	0.207291	0.11941	0.274189
Ncl	1000	1525	807	594	41	4.97215	4.23055	3.96597
Snora75	1000	27	17	10	51	-0.410838	-0.617555	-0.780259
Snord82	1000	23	23	19	76	-0.987861	-0.793698	-0.745986
Nmur1	1000	17	11	17	42	-0.596631	-0.721483	-0.262922
Pde6d	1000	547	448	323	67	3.00602	2.91557	2.65983
Nppc	1000	235	146	114	38	2.42702	1.9543	1.79935
Alppl2	1000	29	17	12	19	0.522076	0.191309	0.0699494
Alpi	1000	35	25	9	26	0.463481	0.284802	-0.291963
Ecel1	1000	34	91	47	39	0.0745956	1.33267	0.732719
Kcnj13	1000	33	19	29	46	-0.116765	-0.432526	0.104895
Ngef	1000	105	68	107	29	1.61843	1.23478	1.92936
Usp40	1000	479	368	234	56	3.01576	2.82938	2.39707
Dnajb3	1000	78	42	32	39	0.985328	0.449183	0.340401
Hjurp	1000	739	397	202	135	2.59489	1.93952	1.24702
A730008H23Rik	1000	782	419	217	135	2.6748	2.01439	1.34302
Glrp1	1000	30	26	16	33	0.109519	0.128971	-0.110215
Arl4c	1000	1005	643	493	31	4.63741	4.15272	3.92902
4933400F21Rik	1000	41	33	19	32	0.446421	0.377098	0.042728
Gbx2	1000	501	553	118	36	3.52028	3.81438	1.88714
Asb18	1000	28	12	17	32	0.0729627	-0.430257	-0.0421609
Iqca	1000	135	70	64	52	1.38107	0.745095	0.823191
Rab17	1000	36	37	82	26	0.491496	0.65517	1.67889
Ilkap	1000	773	679	426	34	4.18278	4.15224	3.65441
1700020N18Rik	1000	40	23	12	33	0.393312	0.022056	-0.30286
Hes6	1000	829	730	526	52	3.86548	3.86186	3.58341
Per2	1000	123	144	243	44	1.43198	1.80221	2.66912
Hdac4	1000	29	18	33	39	-0.0774075	-0.321335	0.370149
Ndufa10	1000	410	298	223	29	3.43427	3.13709	2.88771
Olfr1416	1000	12	4	8	25	-0.369756	-0.721416	-0.324128
Olfr1415	1000	9	9	6	23	-0.467399	-0.338814	-0.39467
Olfr1414	1000	19	16	9	32	-0.257186	-0.237612	-0.442699
Myeov2	1000	456	382	388	53	3.00536	2.93649	3.14166
Otos	1000	24	18	45	48	-0.45273	-0.51524	0.505549
Ankmy1	1000	41	27	52	41	0.215392	-0.0279314	0.800763
9430060I03Rik	1000	26	14	13	35	-0.075342	-0.406587	-0.29842
Kif1a	1000	181	245	728	47	1.86882	2.44551	4.13296
2310007B03Rik	1000	34	14	18	18	0.711728	0.088106	0.380768
Mterfd2	1000	227	190	121	92	1.42877	1.3924	1.01719
Pask	1000	573	360	171	47	3.4489	2.97219	2.1407
Hdlbp	1000	1856	1686	961	39	5.3011	5.32422	4.68765
Stk25	1000	436	380	440	48	3.04552	3.02665	3.4077
Thap4	1000	852	775	337	20	4.75508	4.74095	3.69605
Dtymk	1000	475	305	195	69	2.77576	2.3525	1.94588
Pdcd1	1000	27	20	14	18	0.494136	0.35114	0.200196
St8sia4	1000	85	171	408	53	0.780932	1.84676	3.21137
Slco4c1	1000	57	28	83	45	0.480436	-0.0814875	1.2619
Slco6b1	1000	6	10	0	43	-1.20474	-0.797769	-1.32764
Slco6c1	1000	13	7	1	51	-0.979122	-1.13839	-1.39324
D1Ertd622e	1000	444	328	325	35	3.37783	3.11279	3.25723
Ppip5k2	1000	467	439	350	57	2.96145	3.05612	2.93
Pam	1000	462	335	192	29	3.60043	3.29779	2.68728
Rnf152	1000	149	84	168	32	1.97985	1.40624	2.43701
Pign	1000	680	720	375	41	3.82545	4.06937	3.32432
Bcl2	1000	642	457	355	31	4.00359	3.67429	3.47277
Kdsr	1000	350	252	267	49	2.71992	2.44337	2.70073
Vps4b	1000	360	184	137	63	2.49167	1.76662	1.57382
Serpinb3a	1000	9	5	12	26	-0.565088	-0.680433	-0.128464
Serpinb3d	1000	10	14	5	44	-0.986519	-0.612832	-0.955369
Serpinb3b	1000	5	6	5	27	-0.847773	-0.642137	-0.569744
Serpinb3c	1000	1	3	1	16	-0.766285	-0.499709	-0.555776
Cdh19	1000	18	7	13	28	-0.183116	-0.606261	-0.129853
Dsel	1000	212	129	230	41	2.21539	1.72571	2.65581
Tsn	1000	671	502	472	36	3.93043	3.6789	3.75179
2900060B14Rik	1000	356	382	564	61	2.5115	2.79311	3.52823
Gli2	1000	898	410	239	28	4.56547	3.60489	3.00652
Inhbb	1000	92	51	147	33	1.34084	0.802743	2.23851
Ralb	1000	181	146	161	51	1.78495	1.6779	1.98691
Epb4.1l5	1000	425	229	161	39	3.21537	2.52784	2.22304
Ptpn4	1000	1135	748	292	24	5.02411	4.5641	3.38493
Tmem177	1000	103	98	88	50	1.07823	1.19042	1.23801
Gm101	1000	20	13	9	52	-0.687406	-0.823188	-0.854881
Tmem37	1000	150	50	37	30	2.04535	0.85967	0.689882
Dbi	1000	677	559	652	44	3.74975	3.6477	4.03602
Steap3	1000	80	39	61	30	1.25528	0.596636	1.22875
Marco	1000	31	12	13	43	-0.109586	-0.690854	-0.469662
Insig2	1000	672	576	417	31	4.06791	3.99804	3.69572
Htr5b	1000	17	20	8	46	-0.687081	-0.391884	-0.801995
Ddx18	1000	162	140	43	60	1.46604	1.45905	0.247182
Dpp10	1000	70	89	344	20	1.4198	1.82766	3.72438
Actr3	1000	1267	796	489	36	4.83157	4.32743	3.80119
Lypd1	1000	60	71	284	23	1.13667	1.46027	3.37472
Nckap5	1000	242	222	76	27	2.77114	2.79325	1.5615
Tmem163	1000	77	170	118	32	1.15269	2.30155	1.97953
Ysk4	1000	24	16	9	44	-0.365031	-0.519722	-0.70383
Zranb3	1000	479	345	446	71	2.75534	2.49109	3.04723
Lct	1000	30	21	15	37	0.00420772	-0.152471	-0.246958
Mcm6	1000	457	264	86	50	3.06911	2.48681	1.20999
Dars	1000	452	436	203	70	2.69039	2.83075	1.98484
Cxcr4	1000	290	383	174	39	2.68813	3.23145	2.32529
Daf2	1000	20	13	13	17	0.276454	0.0743321	0.182665
Cd55	1000	111	90	231	31	1.63033	1.51651	2.88587
Zp3r	1000	11	12	15	46	-0.976588	-0.754454	-0.432761
C4bp	1000	37	20	20	39	0.15866	-0.238873	-0.0746361
C4bp-ps1	1000	25	25	27	38	-0.186971	-0.0279997	0.203244
Pfkfb2	1000	358	375	449	41	2.9294	3.15683	3.57439
Il24	1000	20	15	22	50	-0.646662	-0.688273	-0.214504
Il20	1000	38	17	20	45	0.0454989	-0.496525	-0.197531
Il19	1000	22	15	13	31	-0.11043	-0.257214	-0.20452
Mapkapk2	1000	1285	564	249	30	5.01572	3.99519	3.01181
Dyrk3	1000	779	426	318	66	3.52056	2.86151	2.65358
Rassf5	1000	156	127	183	39	1.857	1.75107	2.39206
Ikbke	1000	50	29	42	30	0.714707	0.307129	0.819942
Srgap2	1000	543	321	196	72	2.91496	2.37666	1.90897
Mfsd4	1000	80	59	40	31	1.22661	1.01741	0.744854
Cdk18	1000	74	44	28	31	1.1335	0.69548	0.396931
Tmcc2	1000	939	632	340	26	4.69041	4.2671	3.53991
Cntn2	1000	126	256	105	49	1.35397	2.46474	1.47493
Nfasc	1000	38	32	26	38	0.210364	0.199411	0.169297
Mdm4	1000	855	596	261	23	4.65527	4.27472	3.25964
Sox13	1000	1115	626	124	22	5.06622	4.37508	2.30348
Snrpe	1000	650	581	236	63	3.31646	3.34435	2.29371
Zc3h11a	1000	447	390	252	76	2.58161	2.58624	2.19082
Zbed6	1000	1121	875	502	53	4.27374	4.09914	3.50025
Lax1	1000	42	19	17	34	0.416881	-0.159346	-0.0890985
Atp2b4	1000	27	43	30	41	-0.191233	0.428447	0.236862
Optc	1000	75	105	69	31	1.14944	1.70745	1.34689
Prelp	1000	90	50	185	23	1.61666	1.06172	2.79695
Btg2	1000	540	473	558	37	3.59959	3.57177	3.96375
Adora1	1000	71	108	206	26	1.234	1.88145	2.8586
Ppfia4	1000	21	29	29	20	0.202985	0.605265	0.724377
Tmem183a	1000	508	432	303	47	3.28019	3.22495	2.91121
4931440L10Rik	1000	17	19	13	41	-0.573104	-0.324913	-0.428719
Ppp1r12b	1000	278	360	147	74	1.95684	2.50476	1.50134
9530009M10Rik	1000	60	49	82	40	0.654347	0.590692	1.34893
Lgr6	1000	57	23	24	37	0.67047	-0.0765225	0.120774
Ptprv	1000	56	16	18	20	1.16346	0.113411	0.319986
Gpr37l1	1000	23	14	21	31	-0.0729551	-0.30452	0.146953
Elf3	1000	161	70	141	42	1.82658	0.949894	1.9873
Rnpep	1000	347	369	276	50	2.68724	2.94624	2.72739
Timm17a	1000	689	523	353	44	3.77452	3.55442	3.17979
Shisa4	1000	363	352	232	34	3.12495	3.23493	2.8207
Ipo9	1000	717	663	427	56	3.58215	3.65168	3.22244
Nav1	1000	214	519	624	31	2.48713	3.85198	4.25943
Pkp1	1000	42	35	25	30	0.528294	0.487701	0.319513
Igfn1	1000	17	14	17	41	-0.573104	-0.547306	-0.242306
5730559C18Rik	1000	798	594	175	45	3.9595	3.71175	2.20997
Gpr25	1000	69	34	64	31	1.05103	0.432446	1.25943
Camsap1l1	1000	624	672	448	59	3.33042	3.61728	3.23892
9230116N13Rik	1000	1219	753	477	59	4.27879	3.77785	3.32638
Nr5a2	1000	24	13	12	47	-0.4313	-0.72442	-0.598844
Ptprc	1000	26	31	11	44	-0.294641	0.0348667	-0.592799
Nek7	1000	988	349	160	59	3.98004	2.70277	1.84037
Lhx9	1000	20	32	6	42	-0.4711	0.108592	-0.847885
2310009B15Rik	1000	233	145	109	46	2.22853	1.76911	1.57883
Crb1	1000	71	150	34	72	0.231198	1.3551	-0.175093
Cfhr1	1000	14	10	7	40	-0.68669	-0.731236	-0.742222
EG214403	1000	10	13	4	20	-0.306029	-0.0286076	-0.445548
BC026782	1000	17	8	0	41	-0.573104	-0.869234	-1.2867
Cfh	1000	14	15	11	38	-0.637633	-0.431355	-0.468133
Cdc73	1000	1107	399	181	30	4.80346	3.51224	2.58401
Trove2	1000	900	555	279	31	4.48085	3.94594	3.14207
Rgs2	1000	223	190	401	45	2.19148	2.14558	3.33645
Rgs13	1000	103	100	19	53	1.01754	1.15784	-0.38727
Rgs1	1000	17	22	15	48	-0.730264	-0.354776	-0.470992
Rgs18	1000	14	27	4	45	-0.802498	-0.114654	-1.04553
Pla2g4a	1000	17	9	29	41	-0.573104	-0.81034	0.205153
7530420F21Rik	1000	64	27	53	65	0.224584	-0.48393	0.393755
BC003331	1000	786	655	589	51	3.81036	3.72822	3.76009
Prg4	1000	25	13	13	53	-0.519728	-0.842156	-0.658572
Hmcn1	1000	192	95	54	47	1.94721	1.21201	0.723084
1200016B10Rik	1000	1495	1642	721	36	5.06755	5.35732	4.34657
Rnf2	1000	891	524	277	45	4.11557	3.5359	2.8273
1700025G04Rik	1000	1582	1857	1092	26	5.43311	5.79839	5.17792
Tsen15	1000	47	27	25	36	0.483542	0.0883604	0.178601
Rgl1	1000	370	205	217	54	2.6955	2.06904	2.33003
Smg7	1000	22	18	11	45	-0.461461	-0.453456	-0.612568
Lamc2	1000	64	44	35	49	0.526153	0.284167	0.228496
Lamc1	1000	1074	610	476	26	4.88117	4.21727	4.0067
E330020D12Rik	1000	7	15	16	23	-0.587694	-0.0284736	0.145898
Dhx9	1000	843	632	220	37	4.22716	3.97793	2.68149
Npl	1000	50	45	35	43	0.380219	0.432528	0.344783
5830403L16Rik	1000	29	31	22	33	0.0778098	0.291243	0.137713
Cacna1e	1000	42	35	124	30	0.528294	0.487701	2.09124
Ier5	1000	142	189	95	78	1.00072	1.57169	0.891791
Mr1	1000	47	21	36	80	-0.354984	-0.926474	-0.229032
Xpr1	1000	260	285	131	45	2.39914	2.6927	1.83222
Lhx4	1000	101	90	29	24	1.72581	1.71459	0.609995
Qsox1	1000	283	139	149	39	2.65474	1.86733	2.12176
Cep350	1000	867	896	723	45	4.07688	4.29197	4.16197
Tor1aip1	1000	384	227	139	69	2.48003	1.95089	1.50091
Fam163a	1000	83	73	38	29	1.32892	1.3182	0.741733
Tdrd5	1000	124	67	65	30	1.7996	1.19032	1.30181
9430070O13Rik	1000	33	29	27	63	-0.44821	-0.385388	-0.257302
Soat1	1000	262	154	108	38	2.57442	2.02384	1.73118
Tor3a	1000	171	90	67	45	1.83751	1.187	1.00758
Fam20b	1000	930	463	288	32	4.49923	3.66627	3.16137
Ralgps2	1000	1669	611	356	19	5.74876	4.43924	3.80175
1700057K13Rik	1000	29	13	11	17	0.598383	0.0743321	0.0795719
Rasal2	1000	656	532	213	38	3.84779	3.71248	2.61618
Fam5b	1000	67	94	209	31	1.01668	1.56995	2.75128
Pappa2	1000	31	39	23	54	-0.342367	0.0625015	-0.24875
Tnn	1000	27	21	24	32	0.0397958	-0.0281585	0.235373
Cacybp	1000	1314	1361	918	39	4.80795	5.01851	4.62272
Rabgap1l	1000	129	573	870	49	1.38413	3.5794	4.34723
Gpr52	1000	33	12	15	46	-0.116765	-0.754454	-0.432761
Zbtb37	1000	1353	942	611	38	4.87438	4.51833	4.0693
Dars2	1000	349	265	160	63	2.44883	2.25719	1.77586
Klhl20	1000	123	136	66	65	1.0216	1.33773	0.642783
4930469G21Rik	1000	25	16	7	51	-0.479551	-0.661949	-0.957137
Prdx6	1000	320	145	86	48	2.61766	1.72821	1.24724
Fasl	1000	22	17	6	31	-0.11043	-0.167016	-0.603069
AI848100	1000	719	513	342	38	3.97708	3.66157	3.26079
Dnm3	1000	47	58	122	32	0.590811	0.971841	2.02197
Mettl13	1000	334	292	251	73	2.22384	2.23183	2.22746
7420461P10Rik	1000	28	23	15	42	-0.181594	-0.190968	-0.35312
Prrc2c	1000	924	774	381	60	3.86682	3.79935	2.99753
Fmo4	1000	31	25	16	34	0.113488	0.0689225	-0.133493
Fmo1	1000	22	25	10	49	-0.547848	-0.265171	-0.74349
Fmo2	1000	26	13	18	40	-0.201264	-0.573695	-0.178321
Fmo6	1000	44	18	23	53	0.0296108	-0.612674	-0.231151
Fmo3	1000	28	13	13	44	-0.227527	-0.661741	-0.489706
4921528O07Rik	1000	12	6	17	40	-0.786226	-0.972244	-0.22139
Prrx1	1000	49	52	71	62	-0.0230268	0.226986	0.775234
Gorab	1000	621	693	858	69	3.15133	3.49572	3.99627
Mettl11b	1000	59	31	14	56	0.293297	-0.200999	-0.661828
BC055324	1000	328	174	301	55	2.5099	1.83252	2.7568
Blzf1	1000	247	225	227	69	1.8751	1.93896	2.14959
Atp1b1	1000	402	449	417	31	3.349	3.64968	3.69572
Xcl1	1000	33	9	29	36	0.120971	-0.694048	0.312902
Tbx19	1000	35	21	26	31	0.314068	-0.00195688	0.329817
Sft2d2	1000	206	82	97	35	2.32676	1.30123	1.66378
Tiprl	1000	555	434	625	50	3.34076	3.17131	3.86175
Dcaf6	1000	915	553	614	49	4.06686	3.52956	3.85528
Mpzl1	1000	771	435	263	53	3.74294	3.11685	2.60757
Rcsd1	1000	185	95	56	32	2.26458	1.5568	1.08337
Pou2f1	1000	38	67	254	67	-0.376079	0.432627	2.33151
Dusp27	1000	47	31	21	34	0.53618	0.265959	0.0759608
Mael	1000	42	19	7	47	0.104753	-0.453118	-0.882637
Pogk	1000	421	243	204	38	3.22697	2.63126	2.55834
Gm4846	1000	6	2	3	14	-0.311432	-0.502871	-0.328936
Gm4847	1000	6	11	4	51	-1.37767	-0.907062	-1.15877
Fmo9	1000	15	14	9	62	-1.0912	-0.953587	-1.02385
Uck2	1000	697	498	264	37	3.9584	3.6437	2.92813
Mgst3	1000	356	282	271	41	2.92166	2.76497	2.87821
Lrrc52	1000	39	33	81	39	0.212099	0.205912	1.35535
Pbx1	1000	309	297	189	56	2.40877	2.53443	2.11076
Nuf2	1000	216	221	183	63	1.79506	2.0115	1.95306
Rgs4	1000	30	38	164	40	-0.070019	0.323212	2.22607
Hsd17b7	1000	254	358	447	68	1.92933	2.58864	3.09453
Ddr2	1000	17	19	19	46	-0.687081	-0.432526	-0.257675
Uap1	1000	472	587	534	35	3.46308	3.92254	3.94689
Uhmk1	1000	252	183	110	36	2.57235	2.29872	1.79833
Gm7694	1000	42	28	25	44	0.171022	-0.0602906	0.00986543
Nos1ap	1000	358	167	120	44	2.85994	1.99598	1.73978
Atf6	1000	193	152	135	78	1.40429	1.28452	1.33578
Dusp12	1000	246	182	127	38	2.4889	2.2438	1.93685
Fcrlb	1000	18	6	13	23	-0.0237927	-0.523238	0.00387926
Fcrla	1000	22	12	11	29	-0.0525079	-0.35018	-0.258267
Fcgr2b	1000	16	11	7	46	-0.731475	-0.806922	-0.863396
Fcgr3	1000	44	17	26	42	0.265865	-0.431976	0.0850009
Sdhc	1000	367	357	403	51	2.7441	2.88108	3.23011
Pcp4l1	1000	32	38	23	58	-0.388121	-0.0365173	-0.317073
Tomm40l	1000	186	141	172	47	1.90498	1.71222	2.14839
Fcer1g	1000	39	38	32	40	0.187779	0.323212	0.319178
Ndufs2	1000	547	376	386	54	3.24003	2.89585	3.1169
Ppox	1000	226	103	213	67	1.7879	0.952406	2.09389
Usp21	1000	967	692	359	50	4.12446	3.82514	3.08832
Ufc1	1000	306	322	268	73	2.10354	2.36592	2.31651
Nit1	1000	611	447	442	51	3.45522	3.19292	3.35851
Klhdc9	1000	259	231	280	91	1.62021	1.66681	2.14064
Itln1	1000	20	17	18	60	-0.839767	-0.78196	-0.547998
Ly9	1000	11	19	8	38	-0.789636	-0.256269	-0.638058
Slamf7	1000	15	11	6	32	-0.432273	-0.482724	-0.627123
Vangl2	1000	1809	1365	636	26	5.62474	5.35875	4.41291
Nhlh1	1000	281	290	34	27	2.97423	3.15582	0.681795
Ncstn	1000	477	470	431	57	2.99102	3.15121	3.21844
Pea15a	1000	445	426	448	49	3.05285	3.16518	3.41405
Casq1	1000	86	62	119	37	1.15307	0.923477	1.87566
Atp1a4	1000	30	16	18	19	0.553785	0.146915	0.350057
Atp1a2	1000	51	29	121	34	0.624989	0.203224	1.96454
Kcnj9	1000	48	64	121	45	0.290611	0.781009	1.73058
Slamf8	1000	50	22	21	34	0.603294	-0.040702	0.0759608
Fcrl6	1000	20	15	7	36	-0.323813	-0.383708	-0.655389
Dusp23	1000	464	235	162	63	2.84397	2.0943	1.79217
Apcs	1000	35	41	23	21	0.630175	0.913558	0.488469
Olfr1408	1000	17	9	6	19	0.0746168	-0.209229	-0.277974
Olfr1406	1000	20	12	3	50	-0.646662	-0.835115	-1.2145
Fcer1a	1000	14	10	11	42	-0.734135	-0.775931	-0.552429
Darc	1000	24	19	47	40	-0.271653	-0.302393	0.711496
Cadm3	1000	205	353	309	38	2.24338	3.14193	3.12127
BC094916	1000	5	8	3	25	-0.784793	-0.458381	-0.661163
Pydc4	1000	11	2	6	14	-0.0159765	-0.502871	-0.117432
Ifi204	1000	13	2	7	9	0.31791	-0.29679	0.127369
Mndal	1000	8	9	4	8	0.0958357	0.22214	-0.0352475
Mnda	1000	14	7	3	4	0.641697	0.29735	0.0583143
Ifi203	1000	9	7	2	5	0.319337	0.245934	-0.0634384
Ifi202b	1000	9	9	2	31	-0.714501	-0.567554	-0.892576
Ifi205	1000	15	17	7	37	-0.565158	-0.317531	-0.677592
Olfr231	1000	17	6	10	48	-0.730264	-1.14327	-0.724748
Olfr419	1000	15	23	16	41	-0.663302	-0.168794	-0.2867
Grem2	1000	44	144	72	37	0.387536	1.96	1.25828
Rgs7	1000	226	416	357	48	2.1442	3.15218	3.11784
Fh1	1000	289	261	206	72	2.04092	2.0938	1.97547
Opn3	1000	653	473	220	38	3.84134	3.54814	2.65962
Chml	1000	36	36	34	66	-0.413814	-0.225954	-0.0862643
Pld5	1000	51	81	72	55	0.149721	0.862573	0.907893
B020018G12Rik	1000	12	16	13	14	0.0364909	0.327204	0.281118
Cep170	1000	30	32	33	73	-0.703811	-0.449999	-0.218527
Mir350	1000	30	26	26	57	-0.430863	-0.38129	-0.193378
Akt3	1000	65	48	24	41	0.722352	0.545804	0.0352282
Adss	1000	694	407	243	65	3.37433	2.81432	2.30204
Hnrnpu	1000	1435	1114	744	41	4.88533	4.68791	4.28316
Smyd3	1000	148	73	58	76	1.08429	0.396633	0.334184
Tfb2m	1000	794	714	418	28	4.3912	4.38193	3.77372
Ahctf1	1000	144	102	87	66	1.20767	0.95625	0.95638
Adck3	1000	10	7	14	38	-0.844083	-0.86199	-0.31613
Psen2	1000	45	13	16	46	0.199262	-0.703828	-0.386958
Gm5069	1000	362	227	204	21	3.51999	3.00548	2.98443
6330403A02Rik	1000	54	34	165	42	0.488258	0.167486	2.19253
Mixl1	1000	92	45	13	19	1.78511	1.07765	0.120575
H3f3a	1000	3289	2365	943	14	6.91957	6.54456	5.32852
Ephx1	1000	29	58	163	36	-0.00188527	0.871549	2.30486
Nvl	1000	498	351	195	80	2.67336	2.38371	1.79163
Wdr26	1000	1681	702	538	28	5.45819	4.35802	4.12591
Ccdc121	1000	44	17	28	33	0.492847	-0.218952	0.349217
Lbr	1000	1443	727	474	35	5.0431	4.22374	3.78024
Enah	1000	1590	1043	647	18	5.71713	5.2297	4.66617
Vmn1r1	1000	17	16	14	28	-0.226184	-0.129823	-0.0809434
Degs1	1000	494	309	157	34	3.55325	3.05567	2.30114
Fbxo28	1000	635	508	303	67	3.21555	3.09101	2.5721
Capn2	1000	435	372	252	38	3.27246	3.21436	2.84307
4922505E12Rik	1000	52	29	18	37	0.568109	0.129928	-0.113691
1700056E22Rik	1000	776	566	449	29	4.32892	4.02734	3.84793
Hlx	1000	46	36	47	41	0.336698	0.246244	0.69058
Mosc1	1000	44	27	18	23	0.795635	0.443595	0.233361
Mosc2	1000	254	131	199	44	2.38986	1.67995	2.40051
Mir1981	1000	34	31	34	42	0.00283093	0.0782184	0.33654
C130074G19Rik	1000	49	43	26	38	0.477845	0.497091	0.169297
Mark1	1000	377	357	398	37	3.09903	3.18111	3.49233
Iars2	1000	455	313	196	45	3.17019	2.82102	2.36046
Lyplal1	1000	150	164	197	39	1.80578	2.08306	2.49015
Tgfb2	1000	43	50	118	45	0.173254	0.503475	1.69863
Rrp15	1000	405	437	286	80	2.38541	2.68744	2.30893
Spata17	1000	670	696	503	58	3.44898	3.68433	3.41712
Kctd3	1000	532	420	157	56	3.16251	3.0126	1.86591
Kcnk2	1000	225	260	170	30	2.5832	2.9238	2.50112
Cenpf	1000	550	268	61	42	3.50363	2.67338	0.95947
Smyd2	1000	611	256	161	40	3.69874	2.65579	2.20182
Prox1	1000	874	577	274	38	4.25314	3.82634	2.95689
Rps6kc1	1000	277	444	293	56	2.25923	3.0899	2.70274
Vash2	1000	629	657	434	52	3.47582	3.71329	3.31504
Mfsd7b	1000	453	451	408	49	3.07767	3.24456	3.28399
Tatdn3	1000	559	373	146	54	3.27046	2.88477	1.8057
Fam71a	1000	15	17	23	36	-0.539542	-0.29351	0.106451
Atf3	1000	247	180	140	32	2.65245	2.3771	2.19885
Nenf	1000	219	111	46	23	2.76526	2.00601	1.10009
Ppp2r5a	1000	488	470	472	40	3.3837	3.49314	3.66495
Dtl	1000	992	795	295	50	4.16069	4.02109	2.81834
1700034H15Rik	1000	187	108	121	42	2.02431	1.47783	1.79072
Traf5	1000	79	64	43	43	0.905681	0.823719	0.555
Rcor3	1000	2173	1795	901	16	6.24231	6.07493	5.19754
Hhat	1000	123	100	50	57	1.16452	1.08437	0.458698
Sertad4	1000	46	47	84	43	0.290021	0.479071	1.31621
Syt14	1000	311	205	219	36	2.85941	2.45	2.69757
AA408296	1000	322	219	243	49	2.6051	2.25379	2.57288
Traf3ip3	1000	24	12	13	33	-0.0921152	-0.455991	-0.252234
Hsd11b1	1000	30	8	40	44	-0.163397	-0.93476	0.459668
G0s2	1000	108	149	99	34	1.5131	2.07769	1.712
Camk1g	1000	85	66	100	52	0.80088	0.676383	1.35924
Mir205	1000	59	65	58	32	0.84235	1.10224	1.1229
C030002c11rik	1000	82	45	154	37	1.09536	0.568813	2.20824
Cd46	1000	82	36	41	47	0.861481	0.118039	0.426691
Cr1l	1000	286	197	343	98	1.66696	1.36759	2.33688
Cr2	1000	20	14	17	38	-0.374598	-0.478661	-0.178627
Cnksr3	1000	263	80	111	38	2.5796	1.19941	1.76566
Ipcef1	1000	19	12	12	46	-0.602192	-0.754454	-0.579603
Rgs17	1000	74	76	120	29	1.19142	1.36603	2.07431
Mtrf1l	1000	649	293	263	43	3.71304	2.77325	2.79648
Fbxo5	1000	735	444	288	18	4.62054	4.02671	3.54123
Syne1	1000	49	46	189	24	0.877809	0.94087	2.79762
Rmnd1	1000	449	377	246	41	3.24359	3.16419	2.74672
Gm5512	1000	46	13	20	35	0.486537	-0.455496	0.0135241
Zbtb2	1000	795	507	268	27	4.42347	3.9291	3.18769
Lrp11	1000	158	183	129	54	1.54599	1.91777	1.64576
A630066F11Rik	1000	1387	1034	568	26	5.24536	4.96342	4.25401
Nup43	1000	183	177	119	43	1.97245	2.09425	1.74917
Lats1	1000	2225	1517	721	49	5.33415	4.95942	4.08159
Katna1	1000	236	162	146	54	2.08032	1.75688	1.8057
Ppil4	1000	390	390	288	45	2.95595	3.12442	2.88047
Zc3h12d	1000	25	13	3	22	0.280387	-0.0933674	-0.577873
Gm5177	1000	37	35	26	32	0.341452	0.434813	0.305762
Shprh	1000	288	175	87	58	2.27484	1.78602	1.08402
Fbxo30	1000	1890	1239	823	16	6.04258	5.54584	5.06929
Epm2a	1000	781	504	381	49	3.84266	3.39964	3.18907
Sf3b5	1000	317	200	142	47	2.62615	2.17249	1.89758
Plagl1	1000	337	173	85	42	2.8225	2.08587	1.35089
Fuca2	1000	82	47	52	54	0.717754	0.258422	0.553311
Adat2	1000	211	183	124	51	1.98945	1.97468	1.64858
Hivep2	1000	1623	706	593	17	5.78513	4.71221	4.57498
Nmbr	1000	24	8	21	40	-0.271653	-0.846713	-0.056331
Cited2	1000	1771	1689	987	24	5.65877	5.72223	5.08825
Txlnb	1000	118	136	137	51	1.22899	1.58598	1.77669
Reps1	1000	1192	755	306	21	5.19615	4.67126	3.53398
Nhsl1	1000	156	78	88	46	1.69479	0.99278	1.31348
Perp	1000	116	51	57	22	1.96723	1.11474	1.36402
Olig3	1000	55	21	8	33	0.735704	-0.0538928	-0.525252
Ifngr1	1000	166	114	78	25	2.33068	1.97902	1.6455
Il22ra2	1000	25	12	7	32	-0.0289169	-0.430257	-0.562993
Il20ra	1000	42	15	26	34	0.416881	-0.334433	0.258825
Map3k5	1000	245	126	141	21	2.98566	2.23042	2.49769
Mtap7	1000	109	39	46	27	1.72569	0.679791	0.992135
Gm6251	1000	38	24	15	46	0.0234125	-0.239881	-0.432761
Bclaf1	1000	1979	2015	1182	42	5.32115	5.5116	4.9191
Fam54a	1000	206	94	67	74	1.55158	0.731535	0.527655
Ahi1	1000	529	580	986	60	3.08042	3.39281	4.33321
Hbs1l	1000	171	136	86	61	1.51924	1.40441	1.02075
Aldh8a1	1000	28	21	14	29	0.158996	0.0519188	-0.106264
1700020N01Rik	1000	27	19	10	46	-0.30521	-0.432526	-0.686518
Sgk1	1000	34	158	265	52	-0.213475	1.76177	2.63569
Raet1a	1000	80	21	23	50	0.768375	-0.433016	-0.177029
Raet1e	1000	23	10	6	14	0.514538	0.0276438	-0.117432
Raet1b	1000	18	10	5	8	0.598336	0.278724	0.0351418
Raet1c	1000	18	10	5	8	0.598336	0.278724	0.0351418
H60b	1000	29	6	2	25	0.314742	-0.583912	-0.739166
C920009B18Rik	1000	75	39	39	96	-0.0389493	-0.561831	-0.3466
Raet1d	1000	8	1	0	1	0.513956	0.0274985	-0.0497903
Gm10825	1000	0	0	0	0	0	0	0
Slc2a12	1000	121	45	85	44	1.41107	0.411015	1.31052
1110021L09Rik	1000	80	61	58	37	1.06561	0.904862	1.0083
Vnn3	1000	14	8	12	13	0.179326	-0.0489053	0.264861
Vnn1	1000	51	27	27	28	0.795511	0.296442	0.438431
Taar1	1000	21	10	8	52	-0.647878	-0.98073	-0.913775
Taar2	1000	47	21	48	50	0.160693	-0.433016	0.537569
Taar3	1000	20	23	18	66	-0.944328	-0.640991	-0.642658
Taar4	1000	28	16	14	53	-0.417848	-0.700137	-0.609663
Taar5	1000	26	15	14	70	-0.787657	-1.03523	-0.883053
Taar7b	1000	23	26	11	49	-0.510373	-0.230406	-0.689042
Taar7d	1000	18	12	8	46	-0.644012	-0.754454	-0.801995
Taar7e	1000	24	15	11	34	-0.119172	-0.334433	-0.378605
Taar7f	1000	34	15	11	30	0.314169	-0.230528	-0.283151
Taar8a	1000	11	7	2	32	-0.631581	-0.71405	-0.91663
Stx7	1000	203	248	204	68	1.6273	2.08614	2.02102
Moxd1	1000	157	87	25	23	2.32337	1.70383	0.50345
Ctgf	1000	527	255	70	55	3.16844	2.34481	0.874726
Med23	1000	214	159	106	57	1.89106	1.6776	1.34504
Epb4.1l2	1000	307	103	120	38	2.79087	1.50927	1.86444
Gm9767	1000	105	87	126	35	1.4512	1.37302	1.99335
Samd3	1000	20	7	16	41	-0.447573	-0.930634	-0.2867
Arhgap18	1000	128	81	244	37	1.65057	1.23799	2.82121
Ptprk	1000	547	334	242	32	3.75052	3.2136	2.92467
Themis	1000	32	21	22	44	-0.101996	-0.310269	-0.0997591
6330407J23Rik	1000	454	1531	761	40	3.28294	5.16358	4.33599
9330159F19Rik	1000	31	28	32	51	-0.282514	-0.202518	0.104264
Echdc1	1000	614	303	346	52	3.44188	2.63624	3.00111
Hddc2	1000	272	123	155	45	2.46054	1.57802	2.0504
Trdn	1000	29	41	16	39	-0.0774075	0.424092	-0.244561
Sult3a1	1000	5	8	2	45	-1.31707	-0.955957	-1.19753
Rsph4a	1000	25	17	17	62	-0.687843	-0.816083	-0.623315
Bet3l	1000	14	15	34	50	-0.909696	-0.688273	0.181425
Tspyl1	1000	540	468	329	42	3.47792	3.44249	3.12314
Tspyl4	1000	282	609	574	77	1.93093	3.19419	3.31556
Col10a1	1000	18	21	15	47	-0.665766	-0.372948	-0.452003
Frk	1000	38	32	21	35	0.287228	0.271485	0.0530525
Hs3st5	1000	57	125	325	39	0.620564	1.73075	3.16907
Hdac2	1000	1754	1543	884	39	5.22027	5.19761	4.56922
Lama4	1000	43	31	25	50	0.066056	-0.0878808	-0.104879
Tube1	1000	254	184	141	63	2.0139	1.76662	1.61105
Fyn	1000	608	511	230	36	3.79166	3.70375	2.76356
Traf3ip2	1000	139	52	83	32	1.88966	0.849851	1.5428
Rev3l	1000	2869	2073	1376	12	6.81143	6.43474	5.93566
Cdk19	1000	631	362	138	43	3.67345	3.06403	1.93914
Slc22a16	1000	33	12	10	23	0.503454	-0.175315	-0.153662
Ddo	1000	21	12	27	44	-0.477505	-0.712367	0.0785782
9030224M15Rik	1000	164	74	36	24	2.34729	1.47853	0.818581
Wasf1	1000	1026	1038	680	52	4.16781	4.36049	3.94421
Zbtb24	1000	408	384	250	66	2.61367	2.71746	2.32516
Mical1	1000	180	217	64	34	2.17361	2.57556	1.18844
Ppil6	1000	560	243	155	32	3.78346	2.7792	2.3313
Cd164	1000	2415	1915	1272	27	6.00724	5.81356	5.36886
Sesn1	1000	1244	861	566	35	4.83155	4.46296	4.02847
Snx3	1000	706	624	668	51	3.65875	3.65998	3.93715
Ostm1	1000	167	154	146	39	1.94644	2.00059	2.09529
Sec63	1000	389	253	144	42	3.02075	2.59509	2.01461
Scml4	1000	53	111	268	30	0.778837	1.80396	3.11171
9030612E09Rik	1000	884	1395	446	18	4.88165	5.64372	4.14505
Pdss2	1000	949	924	550	33	4.50034	4.61317	4.03444
Bend3	1000	3017	1506	318	16	6.71278	5.82412	3.74047
Cd24a	1000	1973	2207	648	26	5.74888	6.04554	4.43922
F830002L21Rik	1000	24	22	18	42	-0.319097	-0.228443	-0.219854
Rtn4ip1	1000	392	417	198	52	2.81509	3.07705	2.24273
Speer5-ps1	1000	22	27	20	10	0.658649	0.915911	0.735743
Atg5	1000	379	284	154	40	3.03213	2.79714	2.14361
Mir1929	1000	23	22	13	29	-0.0150332	0.0903929	-0.155174
Prep	1000	615	448	275	36	3.80776	3.52008	3.00592
Popdc3	1000	55	27	29	39	0.580487	0.0174668	0.247292
Bves	1000	191	64	70	34	2.25239	1.0333	1.29277
Hace1	1000	348	267	92	53	2.63051	2.44452	1.23833
Ascc3	1000	538	308	300	68	2.96625	2.38159	2.54344
Sim1	1000	59	40	15	40	0.635238	0.375679	-0.311588
Gp49a	1000	5	6	4	16	-0.461431	-0.288204	-0.321311
Lilrb4	1000	8	4	1	12	-0.0979636	-0.271932	-0.419823
Rfx6	1000	58	26	24	30	0.879766	0.207594	0.283889
Vgll2	1000	41	43	23	23	0.721634	0.899973	0.4313
Dcbld1	1000	291	174	177	36	2.76836	2.23195	2.41351
Nepn	1000	36	25	24	43	0.0362649	-0.140657	-0.00571468
Nus1	1000	505	369	307	51	3.18804	2.92677	2.85469
Slc35f1	1000	149	182	139	45	1.65693	2.08844	1.90867
Pln	1000	24	14	26	46	-0.409547	-0.654919	0.00535982
Asf1a	1000	501	397	469	28	3.74344	3.56017	3.93401
Msl3l2	1000	59	84	37	41	0.611321	1.18966	0.441221
Gja1	1000	196	111	76	61	1.70027	1.14517	0.871887
Hsf2	1000	479	468	267	70	2.77131	2.92943	2.35471
Pkib	1000	37	31	50	48	-0.0467381	-0.0481142	0.619206
Fabp7	1000	203	445	367	42	2.13376	3.37225	3.27388
Smpdl3a	1000	35	46	50	47	-0.080803	0.371795	0.638195
Gcc2	1000	384	244	168	66	2.5296	2.09597	1.79344
Lims1	1000	364	258	210	45	2.86047	2.55711	2.45272
Ranbp2	1000	753	677	663	57	3.63241	3.6631	3.82157
Ccdc138	1000	466	280	241	46	3.18141	2.64764	2.61867
BB019430	1000	11	16	9	35	-0.712772	-0.313477	-0.512545
Sh3rf3	1000	283	193	201	28	2.95342	2.57754	2.77372
Ankrd57	1000	2249	1443	497	25	5.96818	5.46742	4.09372
P4ha1	1000	1040	486	349	35	4.57673	3.65807	3.35535
Pla2g12b	1000	96	76	142	30	1.47767	1.33884	2.26574
Cbara1	1000	100	98	96	40	1.2644	1.40121	1.54157
Dnajb12	1000	1098	896	596	34	4.68043	4.54426	4.1239
[truncated: 20,523 more rows]
