# Supplementary material for: Dynamics and function of distal regulatory elements during neurogenesis and neuroplasticity
Source: HighWire-hosted journal article supplement (doi:10.1101/gr.190926.115), 2015-07-13
Supplement: Supplemental_Table_S3.xlsx [file Supplemental_Table_S3.xlsx]

## Sheet: References For Motifs
1: Ward NL, Hagg T. SEK1/MKK4, c-Jun and NFKappaB are differentially activated in
forebrain neurons during postnatal development and injury in both control and
p75NGFR-deficient mice. Eur J Neurosci. 2000 Jun;12(6):1867-81. PubMed PMID:10886328
2: Lee S, Shen R, Cho HH, Kwon RJ, Seo SY, Lee JW, Lee SK. STAT3 promotes motor
neuron differentiation by collaborating with motor neuron-specific LIM complex.
Proc Natl Acad Sci U S A. 2013 Jul 9;110(28):11445-50. doi:
10.1073/pnas.1302676110. Epub 2013 Jun 24. PubMed PMID: 23798382; PubMed Central
PMCID: PMC3710787.
3: Byerly MS, Al Salayta M, Swanson RD, Kwon K, Peterson JM, Wei Z, Aja S, Moran
TH, Blackshaw S, Wong GW. Estrogen-related receptor ß deletion modulates
whole-body energy balance via estrogen-related receptor ? and attenuates
neuropeptide Y gene expression. Eur J Neurosci. 2013 Apr;37(7):1033-47. doi:
10.1111/ejn.12122. Epub 2013 Jan 29. PubMed PMID: 23360481; PubMed Central PMCID:
PMC3618562.
4: Dumitriu A, Latourelle JC, Hadzi TC, Pankratz N, Garza D, Miller JP, Vance JM,
Foroud T, Beach TG, Myers RH. Gene expression profiles in Parkinson disease
prefrontal cortex implicate FOXO1 and genes under its transcriptional regulation.
PLoS Genet. 2012 Jun;8(6):e1002794. doi: 10.1371/journal.pgen.1002794. Epub 2012
Jun 28. PubMed PMID: 22761592; PubMed Central PMCID: PMC3386245.
5: Hu JY, Levine A, Sung YJ, Schacher S. cJun and CREB2 in the Postsynaptic
Neuron Contribute to Persistent Long-Term Facilitation at a Behaviorally Relevant
Synapse. J Neurosci. 2015 Jan 7;35(1):386-95. doi:
10.1523/JNEUROSCI.3284-14.2015. PubMed PMID: 25568130; PubMed Central PMCID:
PMC4287154.
6: Angka HE, Kablar B. Role of skeletal muscle in the epigenetic shaping of motor
neuron fate choices. Histol Histopathol. 2009 Dec;24(12):1579-92. Review. PubMed
PMID: 19795356.
7: Ackermann J, Ashton G, Lyons S, James D, Hornung JP, Jones N, Breitwieser W.
Loss of ATF2 function leads to cranial motoneuron degeneration during embryonic
mouse development. PLoS One. 2011 Apr 21;6(4):e19090. doi:
10.1371/journal.pone.0019090. PubMed PMID: 21533046; PubMed Central PMCID:
PMC3080913.
8: Uittenbogaard M, Chiaramello A. Expression of the bHLH transcription factor
Tcf12 (ME1) gene is linked to the expansion of precursor cell populations during
neurogenesis. Brain Res Gene Expr Patterns. 2002 Jan;1(2):115-21. PubMed PMID:
15018808; PubMed Central PMCID: PMC2757747.
9: Lam BY, Zhang W, Ng DC, Maruthappu M, Roderick HL, Chawla S. CREB-dependent
Nur77 induction following depolarization in PC12 cells and neurons is modulated
by MEF2 transcription factors. J Neurochem. 2010 Feb;112(4):1065-73. doi:
10.1111/j.1471-4159.2009.06521.x. Epub 2009 Dec 3. PubMed PMID: 19968756.
10: Mao Y, Reiprich S, Wegner M, Fritzsch B. Targeted deletion of Sox10 by
Wnt1-cre defects neuronal migration and projection in the mouse inner ear. PLoS
One. 2014 Apr 9;9(4):e94580. doi: 10.1371/journal.pone.0094580. eCollection 2014.
PubMed PMID: 24718611; PubMed Central PMCID: PMC3981815.
11: Lee KE, Seo J, Shin J, Ji EH, Roh J, Kim JY, Sun W, Muhr J, Lee S, Kim J.
Positive feedback loop between Sox2 and Sox6 inhibits neuronal differentiation in
the developing central nervous system. Proc Natl Acad Sci U S A. 2014 Feb
18;111(7):2794-9. doi: 10.1073/pnas.1308758111. Epub 2014 Feb 5. PubMed PMID:
24501124; PubMed Central PMCID: PMC3932859.
12: Bergsland M, Werme M, Malewicz M, Perlmann T, Muhr J. The establishment of
neuronal properties is controlled by Sox4 and Sox11. Genes Dev. 2006 Dec
15;20(24):3475-86. PubMed PMID: 17182872; PubMed Central PMCID: PMC1698453.
13: Stevanovic M. Modulation of SOX2 and SOX3 gene expression during
differentiation of human neuronal precursor cell line NTERA2. Mol Biol Rep. 2003
Jun;30(2):127-32. PubMed PMID: 12841584.
14: Graham V, Khudyakov J, Ellis P, Pevny L. SOX2 functions to maintain neural
progenitor identity. Neuron. 2003 Aug 28;39(5):749-65. PubMed PMID: 12948443.
15: Sagal J, Zhan X, Xu J, Tilghman J, Karuppagounder SS, Chen L, Dawson VL,
Dawson TM, Laterra J, Ying M. Proneural transcription factor Atoh1 drives highly
efficient differentiation of human pluripotent stem cells into dopaminergic
neurons. Stem Cells Transl Med. 2014 Aug;3(8):888-98. doi:
10.5966/sctm.2013-0213. Epub 2014 Jun 5. PubMed PMID: 24904172; PubMed Central
PMCID: PMC4116248.
16: Barber BA, Liyanage VR, Zachariah RM, Olson CO, Bailey MA, Rastegar M.
Dynamic expression of MEIS1 homeoprotein in E14.5 forebrain and differentiated
forebrain-derived neural stem cells. Ann Anat. 2013 Oct;195(5):431-40. doi:
10.1016/j.aanat.2013.04.005. Epub 2013 May 10. PubMed PMID: 23756022.
17: De Marco Garcia NV, Jessell TM. Early motor neuron pool identity and muscle
nerve trajectory defined by postmitotic restrictions in Nkx6.1 activity. Neuron.
2008 Jan 24;57(2):217-31. doi: 10.1016/j.neuron.2007.11.033. PubMed PMID:
18215620; PubMed Central PMCID: PMC2276619.
18: Cho HH, Cargnin F, Kim Y, Lee B, Kwon RJ, Nam H, Shen R, Barnes AP, Lee JW,
Lee S, Lee SK. Isl1 directly controls a cholinergic neuronal identity in the
developing forebrain and spinal cord by forming cell type-specific complexes.
PLoS Genet. 2014 Apr 24;10(4):e1004280. doi: 10.1371/journal.pgen.1004280.
eCollection 2014 Apr. PubMed PMID: 24763339; PubMed Central PMCID: PMC3998908.
19: Kim MY, Jeong BC, Lee JH, Kee HJ, Kook H, Kim NS, Kim YH, Kim JK, Ahn KY, Kim
KK. A repressor complex, AP4 transcription factor and geminin, negatively
regulates expression of target genes in nonneuronal cells. Proc Natl Acad Sci U S
A. 2006 Aug 29;103(35):13074-9. Epub 2006 Aug 21. PubMed PMID: 16924111; PubMed
Central PMCID: PMC1551900.
20: Gordon PJ, Yun S, Clark AM, Monuki ES, Murtaugh LC, Levine EM. Lhx2 balances
progenitor maintenance with neurogenic output and promotes competence state
progression in the developing retina. J Neurosci. 2013 Jul 24;33(30):12197-207.
doi: 10.1523/JNEUROSCI.1494-13.2013. PubMed PMID: 23884928; PubMed Central PMCID:
PMC3721834.
21: Dasen JS, Liu JP, Jessell TM. Motor neuron columnar fate imposed by
sequential phases of Hox-c activity. Nature. 2003 Oct 30;425(6961):926-33. PubMed
PMID: 14586461.
22: Gould A, Itasaki N, Krumlauf R. Initiation of rhombomeric Hoxb4 expression
requires induction by somites and a retinoid pathway. Neuron. 1998
Jul;21(1):39-51. PubMed PMID: 9697850.
23: Davenne M, Maconochie MK, Neun R, Pattyn A, Chambon P, Krumlauf R, Rijli FM.
Hoxa2 and Hoxb2 control dorsoventral patterns of neuronal development in the
rostral hindbrain. Neuron. 1999 Apr;22(4):677-91. PubMed PMID: 10230789.
24: Honig G, Liou A, Berger M, German MS, Tecott LH. Precise pattern of
recombination in serotonergic and hypothalamic neurons in a Pdx1-cre transgenic
mouse line. J Biomed Sci. 2010 Oct 17;17:82. doi: 10.1186/1423-0127-17-82. PubMed
PMID: 20950489; PubMed Central PMCID: PMC2966455.
25: Wang X, Choi JH, Ding J, Yang L, Ngoka LC, Lee EJ, Zha Y, Mao L, Jin B, Ren
M, Cowell J, Huang S, Shi H, Cui H, Ding HF. HOXC9 directly regulates distinct
sets of genes to coordinate diverse cellular processes during neuronal
differentiation. BMC Genomics. 2013 Nov 25;14:830. doi: 10.1186/1471-2164-14-830.
PubMed PMID: 24274069; PubMed Central PMCID: PMC3906982.
26: Rodriguez M, Zoecklein L, Gamez JD, Pavelko KD, Papke LM, Nakane S, Howe C,
Radhakrishnan S, Hansen MJ, David CS, Warrington AE, Pease LR. STAT4- and
STAT6-signaling molecules in a murine model of multiple sclerosis. FASEB J. 2006
Feb;20(2):343-5. Epub 2005 Dec 13. PubMed PMID: 16352646.
27: Swoboda P, Adler HT, Thomas JH. The RFX-type transcription factor DAF-19
regulates sensory neuron cilium formation in C. elegans. Mol Cell. 2000
Mar;5(3):411-21. PubMed PMID: 10882127.
28: Heng YH, Barry G, Richards LJ, Piper M. Nuclear factor I genes regulate
neuronal migration. Neurosignals. 2012;20(3):159-67. doi: 10.1159/000330651. Epub
2012 Mar 27. Review. PubMed PMID: 22456058.
29: Zhang CL, Zou Y, He W, Gage FH, Evans RM. A role for adult TLX-positive
neural stem cells in learning and behaviour. Nature. 2008 Feb
21;451(7181):1004-7. doi: 10.1038/nature06562. Epub 2008 Jan 30. PubMed PMID:18235445
30: Ma K, Zheng S, Zuo Z. The transcription factor regulatory factor X1 increases
the expression of neuronal glutamate transporter type 3. J Biol Chem. 2006 Jul
28;281(30):21250-5. Epub 2006 May 24. PubMed PMID: 16723357.
31: Valdés P, Mercado G, Vidal RL, Molina C, Parsons G, Court FA, Martinez A,
Galleguillos D, Armentano D, Schneider BL, Hetz C. Control of dopaminergic neuron
survival by the unfolded protein response transcription factor XBP1. Proc Natl
Acad Sci U S A. 2014 May 6;111(18):6804-9. doi: 10.1073/pnas.1321845111. Epub
2014 Apr 21. PubMed PMID: 24753614; PubMed Central PMCID: PMC4020088.
32: Hirayama T, Tarusawa E, Yoshimura Y, Galjart N, Yagi T. CTCF is required for
neural development and stochastic expression of clustered Pcdh genes in neurons.
Cell Rep. 2012 Aug 30;2(2):345-57. doi: 10.1016/j.celrep.2012.06.014. Epub 2012
Jul 26. PubMed PMID: 22854024.
