# Supplementary material for: Dynamics and function of distal regulatory elements during neurogenesis and neuroplasticity
Source: HighWire-hosted journal article supplement (doi:10.1101/gr.190926.115), 2015-07-13
Supplement: Supplemental_Table_S4.xlsx [file Supplemental_Table_S4.xlsx]

## Sheet: Supplemental Table S4
id	baseMean	Control baseMean	NMDA baseMean	foldChange	log2FoldChange	pval	padj
0610007C21Rik	884.086	781.205	986.967	1.26339	0.337301	0.0166629	0.0693407
0610007L01Rik	1264.07	1260.85	1267.29	1.0051	0.00734019	0.998751	1
0610007P08Rik	337.057	337.621	336.494	0.996661	-0.00482462	0.863191	1
0610007P14Rik	1157.49	1116.73	1198.24	1.07299	0.101634	0.45718	0.766209
0610007P22Rik	496.29	533.521	459.059	0.860434	-0.216864	0.151464	0.367591
0610008F07Rik	0.262239	0	0.524479	Inf	Inf	1	1
0610009B22Rik	192.949	167.616	218.282	1.30227	0.381033	0.0743462	0.217659
0610009D07Rik	642.967	553.437	732.497	1.32354	0.404405	0.00586141	0.0308461
0610009O20Rik	754.279	765.333	743.225	0.971113	-0.0422887	0.738122	0.978802
0610010B08Rik	2.09162	1.64638	2.53687	1.54087	0.623749	0.889612	1
0610010F05Rik	2509.42	2915.5	2103.34	0.721431	-0.471067	0.000151021	0.0015998
0610010K14Rik	530.369	494.321	566.416	1.14585	0.196415	0.188	0.42847
0610010O12Rik	177.057	152.346	201.767	1.3244	0.405335	0.0812587	0.233216
0610011F06Rik	213.199	189.315	237.083	1.25232	0.324602	0.107873	0.288357
0610011L14Rik	363.044	447.47	278.619	0.622654	-0.683499	6.52699e-05	0.000797507
0610012G03Rik	609.679	595.039	624.319	1.04921	0.0692981	0.624005	0.906225
0610012H03Rik	0.968393	0.448878	1.48791	3.31473	1.72889	0.832425	1
0610030E20Rik	286.853	270.876	302.83	1.11797	0.160876	0.425522	0.73525
0610031J06Rik	566.578	418.592	714.563	1.70706	0.771518	0.000337049	0.00309975
0610037L13Rik	308.873	255.61	362.135	1.41675	0.502582	0.00681799	0.0347243
0610037P05Rik	736.034	700.857	771.211	1.10038	0.138004	0.275386	0.556024
0610038B21Rik	2.42214	3.44189	1.40238	0.407445	-1.29532	0.557513	0.857544
0610039K10Rik	0.224439	0.448878	0	0	#NAME?	0.983977	1
0610040B10Rik	29.5029	23.3476	35.6582	1.52728	0.610961	0.178637	0.413359
0610040J01Rik	4.86355	2.54414	7.18296	2.82334	1.4974	0.281362	0.564354
0910001L09Rik	577.182	528.151	626.212	1.18567	0.245699	0.0971267	0.266395
100043387	0	0	0	NA	NA	NA	NA
1100001G20Rik	0	0	0	NA	NA	NA	NA
1110001A16Rik	159.722	153.102	166.343	1.08649	0.119669	0.5707	0.866862
1110001J03Rik	282.576	245.139	320.012	1.30543	0.384525	0.0349867	0.122199
1110002B05Rik	916.594	696.061	1137.13	1.63366	0.708106	8.37236e-06	0.00014586
1110002L01Rik	80.9474	83.2131	78.6818	0.945546	-0.0807806	0.972383	1
1110002N22Rik	38.8052	38.0129	39.5975	1.04168	0.0589186	0.914693	1
1110003E01Rik	1482.44	1409.46	1555.42	1.10355	0.142155	0.255938	0.530016
1110004E09Rik	204.424	200.091	208.756	1.0433	0.0611605	0.776847	0.995695
1110004F10Rik	3005.61	2973.84	3037.38	1.02136	0.030498	0.769699	0.992755
1110005A03Rik	263.609	241.399	285.819	1.18401	0.243682	0.189257	0.430676
1110006O24Rik	18.9029	18.7082	19.0975	1.02081	0.0297168	0.929271	1
1110007A13Rik	870.94	922.19	819.69	0.888852	-0.169985	0.214962	0.472045
1110007C09Rik	102.064	80.0672	124.06	1.54945	0.631752	0.0180021	0.0733701
1110008F13Rik	241.392	246.784	236	0.956304	-0.0644585	0.740056	0.978802
1110008J03Rik	267.267	292.73	241.803	0.826028	-0.275737	0.158952	0.380661
1110008L16Rik	178.724	216.252	141.197	0.652925	-0.615011	0.00379765	0.0219001
1110008P14Rik	568.524	566.164	570.885	1.00834	0.0119815	0.814978	1
1110012D08Rik	158.237	100.717	215.757	2.14221	1.0991	3.19772e-06	6.65347e-05
1110012J17Rik	530.259	558.817	501.701	0.897791	-0.155549	0.336742	0.635092
1110012L19Rik	220.251	190.661	249.842	1.3104	0.390003	0.0591612	0.183299
1110014N23Rik	935.386	1066.6	804.171	0.753957	-0.407446	0.00338343	0.0199721
1110017D15Rik	43.3935	59.7141	27.0729	0.453375	-1.14122	0.00635136	0.0327166
1110017F19Rik	1.9262	1.04763	2.80476	2.67725	1.42075	0.599907	0.88581
1110018G07Rik	2297.36	2489.1	2105.61	0.845935	-0.241382	0.054879	0.172979
1110018J18Rik	58.092	42.9521	73.232	1.70497	0.769747	0.0278332	0.102863
1110020A21Rik	19.6265	15.8628	23.3902	1.47453	0.560255	0.410907	0.720178
1110020G09Rik	485.056	509.577	460.536	0.903762	-0.145986	0.329692	0.626922
1110021J02Rik	410.81	428.312	393.307	0.918272	-0.123006	0.395603	0.7028
1110021L09Rik	87.1725	72.7346	101.61	1.397	0.482335	0.0918602	0.255829
1110028C15Rik	553.463	573.641	533.285	0.929649	-0.105241	0.66011	0.933468
1110031I02Rik	165.309	124.666	205.951	1.65202	0.724231	0.00100266	0.0074539
1110032A03Rik	292.196	289.44	294.952	1.01904	0.0272168	0.846656	1
1110032A04Rik	11.2163	10.1758	12.2567	1.20449	0.268427	0.911256	1
1110032F04Rik	48.7747	40.7069	56.8424	1.39638	0.481692	0.218397	0.476958
1110034A24Rik	90.015	88.1507	91.8793	1.0423	0.0597668	0.791167	1
1110034B05Rik	213.399	228.821	197.976	0.865201	-0.208893	0.262163	0.537711
1110034G24Rik	118.994	125.865	112.123	0.890819	-0.166796	0.584333	0.875486
1110037F02Rik	800.174	846.309	754.04	0.890975	-0.166543	0.225379	0.48731
1110038B12Rik	685.593	629.322	741.864	1.17883	0.237356	0.185925	0.425193
1110038D17Rik	201.126	160.58	241.673	1.505	0.589765	0.00626862	0.0324017
1110038F14Rik	166.611	135.44	197.782	1.46029	0.546258	0.0150953	0.0644111
1110049F12Rik	1125.81	1168.22	1083.4	0.927394	-0.108745	0.413417	0.72359
1110051M20Rik	1210.26	1234.67	1185.85	0.960466	-0.0581937	0.684814	0.948768
1110054O05Rik	348.045	373.251	322.84	0.864939	-0.20933	0.288206	0.574433
1110057K04Rik	560.52	572.434	548.607	0.958376	-0.0613365	0.680781	0.945862
1110058L19Rik	230.872	196.8	264.943	1.34626	0.428953	0.0330059	0.116983
1110059E24Rik	524.503	467.533	581.473	1.2437	0.314644	0.0470123	0.153646
1110059G10Rik	143.461	136.486	150.437	1.10222	0.140412	0.566371	0.864691
1110059M19Rik	0.219476	0	0.438952	Inf	Inf	1	1
1110065P20Rik	156.674	155.043	158.304	1.02103	0.0300307	0.930386	1
1110067D22Rik	1241.41	1319.82	1163.01	0.881191	-0.182473	0.168394	0.395764
1190002H23Rik	5.41954	3.74164	7.09744	1.89688	0.923627	0.447856	0.757638
1190002N15Rik	624.465	564.05	684.879	1.21422	0.280027	0.193641	0.438074
1190003J15Rik	0	0	0	NA	NA	NA	NA
1190003K10Rik	0.786054	1.04763	0.524479	0.500634	-0.998173	0.972576	1
1190005F20Rik	436.694	506.436	366.952	0.724578	-0.464787	0.0035788	0.0208924
1190005I06Rik	83.0688	78.7221	87.4156	1.11043	0.151122	0.567492	0.865862
1190007F08Rik	60.3159	54.4745	66.1572	1.21446	0.280317	0.420424	0.730808
1190007I07Rik	31.4184	22.8972	39.9396	1.7443	0.802646	0.102929	0.278584
1200009I06Rik	13.2943	8.97905	17.6096	1.96119	0.971731	0.214378	0.471224
1200011I18Rik	528.125	492.667	563.583	1.14394	0.194014	0.216322	0.474337
1200011M11Rik	419.819	559.715	279.924	0.50012	-0.999655	1.7061e-09	1.13728e-07
1200014J11Rik	486.571	516.464	456.677	0.884238	-0.177494	0.226847	0.489133
1200016B10Rik	166.174	137.234	195.115	1.42177	0.50769	0.0711569	0.210661
1300001I01Rik	1505.84	1670.16	1341.52	0.803227	-0.31612	0.0118314	0.0535831
1300002K09Rik	5.70696	5.98677	5.42716	0.906525	-0.141582	1	1
1300010F03Rik	703.974	665.52	742.429	1.11556	0.15777	0.411494	0.720925
1300014I06Rik	124.796	75.5755	174.016	2.30255	1.20323	2.12125e-05	0.000310645
1300017J02Rik	3.09116	3.29202	2.89029	0.877969	-0.187759	0.941241	1
1300018I17Rik	1191.98	1297.96	1086	0.836697	-0.257224	0.0482692	0.156757
1300018J18Rik	184.13	209.517	158.743	0.757663	-0.400371	0.0568934	0.177865
1500001M20Rik	202.309	203.238	201.38	0.990856	-0.0132524	1	1
1500002O20Rik	521.411	574.835	467.987	0.814123	-0.296681	0.0623556	0.190427
1500003O03Rik	958.948	703.843	1214.05	1.72489	0.786505	3.38583e-08	1.41061e-06
1500004A13Rik	572.855	602.371	543.339	0.902001	-0.1488	0.352073	0.653326
1500009L16Rik	337.183	311.74	362.626	1.16323	0.218137	0.1959	0.441997
1500010J02Rik	1188.84	1245.88	1131.79	0.908422	-0.138565	0.374609	0.678495
1500011B03Rik	1652.01	1693.53	1610.49	0.950969	-0.0725301	0.656185	0.930729
1500011H22Rik	1006.32	1091.16	921.482	0.844501	-0.243829	0.0854694	0.242401
1500011K16Rik	141.063	116.883	165.242	1.41373	0.499511	0.0298837	0.108415
1500012F01Rik	1133.8	1101.64	1165.97	1.0584	0.0818809	0.74053	0.978952
1500015A07Rik	293.583	288.241	298.925	1.03707	0.0525098	0.739183	0.978802
1500015O10Rik	987.395	686.614	1288.18	1.87613	0.907758	6.43465e-06	0.000117694
1500017E21Rik	4.54527	6.28578	2.80476	0.446208	-1.16421	0.448327	0.757902
1500031L02Rik	419.362	436.701	402.023	0.920591	-0.119368	0.502587	0.809722
1500032L24Rik	1379.99	1252.65	1507.33	1.20332	0.267018	0.0280316	0.103278
1520402A15Rik	17.287	17.6598	16.9141	0.957773	-0.0622442	1	1
1600002H07Rik	176.534	176.149	176.918	1.00436	0.00627898	0.968556	1
1600002K03Rik	74.6032	67.6456	81.5608	1.20571	0.26988	0.377534	0.681382
1600012F09Rik	424.713	438.349	411.076	0.937783	-0.0926734	0.592588	0.881511
1600012H06Rik	368.27	338.074	398.466	1.17864	0.237118	0.178127	0.412593
1600014C10Rik	401.779	452.266	351.292	0.776738	-0.364499	0.0315696	0.113163
1600014K23Rik	2.60915	4.34039	0.877903	0.202264	-2.30569	0.324365	0.620198
1600015I10Rik	0	0	0	NA	NA	NA	NA
1600016N20Rik	15.6466	13.7691	17.5241	1.27272	0.347912	0.577572	0.872527
1600021P15Rik	1649.36	2019.62	1279.1	0.633335	-0.658959	2.17315e-07	7.00937e-06
1600027N09Rik	158.764	157.736	159.792	1.01303	0.0186813	0.983864	1
1600029D21Rik	2.30547	2.24513	2.36581	1.05375	0.0755351	1	1
1600029I14Rik	0	0	0	NA	NA	NA	NA
1600029O15Rik	8.03824	8.97905	7.09744	0.790444	-0.339264	0.754413	0.988769
1700001C02Rik	0	0	0	NA	NA	NA	NA
1700001C19Rik	1.78662	1.64638	1.92686	1.17036	0.226954	1	1
1700001F09Rik	2.19836	1.94539	2.45134	1.26008	0.333514	1	1
1700001G17Rik	12.9164	13.9182	11.9146	0.856044	-0.224243	0.822375	1
1700001J03Rik	4.24722	3.59177	4.90268	1.36498	0.448876	0.850026	1
1700001J11Rik	2.68008	1.94539	3.41477	1.75532	0.811732	0.791571	1
1700001K19Rik	26.5538	29.6319	23.4757	0.792246	-0.335979	0.520771	0.827063
1700001K23Rik	1.04267	1.64638	0.438952	0.266616	-1.90716	0.764711	0.990733
1700001L05Rik	39.5999	42.0536	37.1461	0.883305	-0.179016	0.702243	0.961203
1700001L19Rik	20.3464	13.6199	27.0729	1.98774	0.99113	0.0707186	0.209925
1700001O22Rik	1.45507	0.897756	2.01239	2.24157	1.16451	0.868865	1
1700001P01Rik	28.1906	39.6608	16.7204	0.421586	-1.2461	0.0199331	0.0792832
1700003E16Rik	50.7563	47.7428	53.7697	1.12624	0.17151	0.633296	0.913435
1700003F12Rik	0.743954	0	1.48791	Inf	Inf	0.570698	0.866862
1700003G18Rik	0.219476	0	0.438952	Inf	Inf	1	1
1700003H04Rik	0	0	0	NA	NA	NA	NA
1700003M02Rik	8.5379	6.73465	10.3412	1.53551	0.618721	0.516684	0.823309
1700006A11Rik	0	0	0	NA	NA	NA	NA
1700006E09Rik	0	0	0	NA	NA	NA	NA
1700007B14Rik	0.518851	0.598751	0.438952	0.733112	-0.447895	1	1
1700007E06Rik	0	0	0	NA	NA	NA	NA
1700007G11Rik	1.97326	2.54414	1.40238	0.551221	-0.859297	0.804067	1
1700007I08Rik	0	0	0	NA	NA	NA	NA
1700007K09Rik	2.66949	2.09526	3.24371	1.54812	0.630519	0.791987	1
1700007K13Rik	40.6671	38.7608	42.5733	1.09836	0.13535	0.791187	1
1700008A04Rik	0	0	0	NA	NA	NA	NA
1700008F21Rik	1.45441	1.94539	0.96343	0.495239	-1.0138	0.791998	1
1700008I05Rik	3.00666	2.24513	3.76819	1.67838	0.747073	0.677502	0.944037
1700008J07Rik	58.6999	52.0802	65.3196	1.25421	0.326779	0.438277	0.747688
1700008O03Rik	31.985	32.7755	31.1945	0.951762	-0.0713267	0.976861	1
1700008P02Rik	0	0	0	NA	NA	NA	NA
1700008P20Rik	0	0	0	NA	NA	NA	NA
1700009J07Rik	0.299376	0.598751	0	0	#NAME?	0.983978	1
1700009N14Rik	0.219476	0	0.438952	Inf	Inf	1	1
1700009P17Rik	6.45257	3.44189	9.46325	2.74943	1.45913	0.217669	0.476246
1700010B08Rik	0.299376	0.598751	0	0	#NAME?	0.983978	1
1700010D01Rik	0	0	0	NA	NA	NA	NA
1700010I14Rik	11.5246	13.7683	9.28088	0.674075	-0.569019	0.46804	0.777246
1700010M22Rik	0	0	0	NA	NA	NA	NA
1700011A15Rik	0	0	0	NA	NA	NA	NA
1700011E24Rik	1.90862	3.29276	0.524479	0.159282	-2.65034	0.346178	0.645984
1700011F03Rik	0	0	0	NA	NA	NA	NA
1700011F14Rik	0	0	0	NA	NA	NA	NA
1700011H14Rik	0.748918	0.448878	1.04896	2.33684	1.22456	1	1
1700011I03Rik	0.561615	0.598751	0.524479	0.875954	-0.191073	1	1
1700011L22Rik	0.448878	0.897756	0	0	#NAME?	0.740289	0.978802
1700012A03Rik	0	0	0	NA	NA	NA	NA
1700012A16Rik	14.5607	19.7551	9.3664	0.474126	-1.07666	0.124143	0.318468
1700012B07Rik	0	0	0	NA	NA	NA	NA
1700012B09Rik	0.219476	0	0.438952	Inf	Inf	1	1
1700012B15Rik	186.694	192.754	180.634	0.937123	-0.0936901	0.60144	0.887199
1700012D14Rik	7.04859	7.7808	6.31638	0.81179	-0.300822	0.861458	1
1700012L04Rik	0	0	0	NA	NA	NA	NA
1700012P22Rik	0.219476	0	0.438952	Inf	Inf	1	1
1700013B16Rik	0.92563	0.448878	1.40238	3.12419	1.64348	0.836548	1
1700013D24Rik	0.299376	0.598751	0	0	#NAME?	0.983978	1
1700013F07Rik	6.33954	4.78927	7.88981	1.64739	0.720185	0.498354	0.806236
1700013G24Rik	0	0	0	NA	NA	NA	NA
1700013H16Rik	0.786718	0	1.57344	Inf	Inf	0.577533	0.872527
1700013N18Rik	0.219476	0	0.438952	Inf	Inf	1	1
1700014N06Rik	0	0	0	NA	NA	NA	NA
1700015E13Rik	2.78156	2.84388	2.71924	0.95617	-0.0646606	1	1
1700015G11Rik	0.224439	0.448878	0	0	#NAME?	0.983977	1
1700016C15Rik	5.5087	6.28578	4.73162	0.752751	-0.409756	0.829437	1
1700016D06Rik	2.58393	1.49651	3.67135	2.45328	1.29471	0.736015	0.978802
1700016H13Rik	0	0	0	NA	NA	NA	NA
1700016K19Rik	4.80321	4.78927	4.81715	1.00582	0.00837453	1	1
1700016M24Rik	0.262239	0	0.524479	Inf	Inf	1	1
1700017B05Rik	52.1137	57.1678	47.0597	0.823185	-0.280711	0.460848	0.769385
1700017D01Rik	0	0	0	NA	NA	NA	NA
1700017N19Rik	0.481715	0	0.96343	Inf	Inf	0.773607	0.992755
1700018A04Rik	0.262239	0	0.524479	Inf	Inf	1	1
1700018A14Rik	4.91425	6.58478	3.24371	0.492608	-1.02149	0.46983	0.7791
1700018B08Rik	3.12829	3.89077	2.36581	0.608057	-0.717721	0.705077	0.962024
1700018B24Rik	0.224439	0.448878	0	0	#NAME?	0.983977	1
1700018C11Rik	0	0	0	NA	NA	NA	NA
1700018F24Rik	0	0	0	NA	NA	NA	NA
1700018L02Rik	5.02765	5.23815	4.81715	0.919629	-0.120877	1	1
1700018L24Rik	0.743954	0	1.48791	Inf	Inf	0.570698	0.866862
1700019A02Rik	2.5405	2.54414	2.53687	0.997142	-0.00412928	1	1
1700019B03Rik	2.63169	2.54414	2.71924	1.06882	0.0960252	1	1
1700019D03Rik	5.40159	5.98603	4.81715	0.804732	-0.31342	0.829785	1
1700019E19Rik	101.651	69.5895	133.712	1.92144	0.942186	0.0185051	0.0749616
1700019G17Rik	36.8929	40.4079	33.3779	0.826025	-0.275743	0.573742	0.869575
1700019L03Rik	12.2474	14.0681	10.4267	0.74116	-0.432144	0.641013	0.919138
1700019M22Rik	0	0	0	NA	NA	NA	NA
1700019N12Rik	12.5523	13.0189	12.0856	0.928311	-0.107319	0.822231	1
1700019N19Rik	0	0	0	NA	NA	NA	NA
1700019O17Rik	0.224439	0.448878	0	0	#NAME?	0.983977	1
1700020A23Rik	5.19175	7.93216	2.45134	0.309038	-1.69414	0.200808	0.450249
1700020C07Rik	3.12962	1.79551	4.46373	2.48605	1.31385	0.585117	0.875899
1700020D05Rik	10.3835	7.63241	13.1346	1.7209	0.783161	0.399733	0.707672
1700020I14Rik	1053.48	1284.5	822.454	0.640289	-0.643205	2.07351e-06	4.63015e-05
1700020L24Rik	5.53058	5.53715	5.524	0.997625	-0.00343093	1	1
1700020N01Rik	0	0	0	NA	NA	NA	NA
1700020N18Rik	0	0	0	NA	NA	NA	NA
1700020O03Rik	620.461	754.123	486.799	0.645517	-0.631473	3.04247e-05	0.000418322
1700021C14Rik	21.5846	18.1087	25.0605	1.38389	0.468732	0.402311	0.71023
1700021F05Rik	206.876	214.156	199.595	0.932005	-0.101591	0.625208	0.906874
1700021F07Rik	0	0	0	NA	NA	NA	NA
1700021K19Rik	1534.76	1755.62	1313.9	0.748397	-0.418124	0.001074	0.00791557
1700022A21Rik	0	0	0	NA	NA	NA	NA
1700022I11Rik	4.964	4.48952	5.43847	1.21137	0.276639	0.882663	1
1700022P22Rik	4.37058	3.74164	4.99952	1.33618	0.418119	0.757575	0.989764
1700023A16Rik	0.823854	0.598751	1.04896	1.75191	0.808927	1	1
1700023E05Rik	0.663391	0.448878	0.877903	1.95577	0.967738	1	1
1700023I07Rik	0	0	0	NA	NA	NA	NA
1700024G13Rik	0	0	0	NA	NA	NA	NA
1700024P04Rik	0	0	0	NA	NA	NA	NA
1700024P16Rik	4.73857	5.53789	3.93925	0.711326	-0.491417	0.825899	1
1700025C18Rik	0	0	0	NA	NA	NA	NA
1700025E21Rik	0.701191	0	1.40238	Inf	Inf	0.581712	0.873344
1700025F22Rik	0	0	0	NA	NA	NA	NA
1700025G04Rik	1456.98	1372.94	1541.02	1.12242	0.166616	0.206482	0.458912
1700025K23Rik	143.647	139.182	148.112	1.06416	0.0897138	0.724056	0.970456
1700026D08Rik	2.5362	1.04763	4.02477	3.84179	1.94178	0.393412	0.699874
1700026D11Rik	0	0	0	NA	NA	NA	NA
1700026J04Rik	4.74383	4.9384	4.54925	0.9212	-0.118414	0.929545	1
1700026L06Rik	5.42983	4.64014	6.21953	1.34038	0.422639	0.682556	0.947014
1700027A23Rik	0.443915	0.448878	0.438952	0.977886	-0.0322622	1	1
1700027D21Rik	2.53554	2.09526	2.97582	1.42026	0.506157	0.911512	1
1700028B04Rik	0.443915	0.448878	0.438952	0.977886	-0.0322622	1	1
1700028J19Rik	16.3478	13.7691	18.9265	1.37457	0.458978	0.454316	0.763946
1700028K03Rik	19.7884	15.1149	24.4618	1.61839	0.694555	0.36175	0.664162
1700028M03Rik	0	0	0	NA	NA	NA	NA
1700028P14Rik	1.97326	2.54414	1.40238	0.551221	-0.859297	0.804067	1
1700029F09Rik	158.334	147.714	168.954	1.14379	0.193826	0.39075	0.696722
1700029F12Rik	0	0	0	NA	NA	NA	NA
1700029G01Rik	31.1403	23.0478	39.2327	1.70223	0.767426	0.106348	0.285296
1700029H14Rik	0.219476	0	0.438952	Inf	Inf	1	1
1700029I01Rik	22.7396	19.4553	26.0239	1.33762	0.419673	0.457833	0.766876
1700029I15Rik	6.03814	6.73465	5.34163	0.793156	-0.334324	0.829924	1
1700029J07Rik	108.604	110.148	107.06	0.971967	-0.0410208	0.927963	1
1700029J11Rik	7.63176	8.08055	7.18296	0.88892	-0.169874	0.830213	1
1700029M20Rik	0	0	0	NA	NA	NA	NA
1700029P11Rik	0	0	0	NA	NA	NA	NA
1700030C10Rik	96.2704	95.0293	97.5114	1.02612	0.0371985	0.98097	1
1700030F18Rik	0.224439	0.448878	0	0	#NAME?	0.983977	1
1700030J22Rik	70.9213	81.1126	60.73	0.748713	-0.417516	0.199424	0.44787
1700030K09Rik	172.456	209.217	135.695	0.648588	-0.624627	0.00357417	0.0208857
1700031F05Rik	0.299376	0.598751	0	0	#NAME?	0.983978	1
1700031M16Rik	0	0	0	NA	NA	NA	NA
1700034E13Rik	0	0	0	NA	NA	NA	NA
1700034F02Rik	4.28369	5.23815	3.32924	0.635576	-0.653863	0.72135	0.969036
1700034H14Rik	198.959	190.809	207.109	1.08542	0.118259	0.629534	0.910288
1700034H15Rik	67.7788	74.8276	60.73	0.8116	-0.30116	0.380868	0.685167
1700034I23Rik	0.823854	0.598751	1.04896	1.75191	0.808927	1	1
1700034J05Rik	0	0	0	NA	NA	NA	NA
1700034O15Rik	0	0	0	NA	NA	NA	NA
1700037C18Rik	63.6368	66.7485	60.525	0.906762	-0.141204	0.731945	0.975819
1700037H04Rik	522.24	419.934	624.547	1.48725	0.572647	0.000248578	0.00240032
1700039E15Rik	0	0	0	NA	NA	NA	NA
1700040I03Rik	218.279	220.447	216.11	0.980326	-0.0286671	0.946426	1
1700040L02Rik	1.44944	1.49651	1.40238	0.937103	-0.0937206	1	1
1700041C23Rik	0	0	0	NA	NA	NA	NA
1700042B14Rik	0	0	0	NA	NA	NA	NA
1700042G07Rik	0.219476	0	0.438952	Inf	Inf	1	1
1700044K03Rik	0	0	0	NA	NA	NA	NA
1700045I19Rik	0.219476	0	0.438952	Inf	Inf	1	1
1700047I17Rik2	0	0	0	NA	NA	NA	NA
1700047M11Rik	0	0	0	NA	NA	NA	NA
1700048O20Rik	74.7145	77.075	72.3541	0.93875	-0.0911874	0.836765	1
1700049E15Rik	0.219476	0	0.438952	Inf	Inf	1	1
1700049G17Rik	107.526	141.125	73.9275	0.523844	-0.93279	0.000412014	0.00364932
1700049L16Rik	0	0	0	NA	NA	NA	NA
1700052I22Rik	0	0	0	NA	NA	NA	NA
1700052K11Rik	82.2665	78.5715	85.9616	1.09406	0.129687	0.592308	0.881458
1700052N19Rik	82.9033	77.0742	88.7324	1.15126	0.203213	0.494516	0.80284
1700054K19Rik	0	0	0	NA	NA	NA	NA
1700054N08Rik	74.8632	84.4069	65.3196	0.773865	-0.369846	0.213529	0.470045
1700054O13Rik	0	0	0	NA	NA	NA	NA
1700056E22Rik	6.67069	4.9384	8.40297	1.70156	0.766856	0.581169	0.873344
1700057G04Rik	0.738327	0.598751	0.877903	1.46622	0.552105	1	1
1700057K13Rik	1.71102	2.54414	0.877903	0.345069	-1.53504	0.645064	0.922001
1700058C13Rik	0	0	0	NA	NA	NA	NA
1700058G18Rik	0.299376	0.598751	0	0	#NAME?	0.983978	1
1700060C20Rik	0.443915	0.448878	0.438952	0.977886	-0.0322622	1	1
1700061G19Rik	33.3067	39.8084	26.805	0.673349	-0.570573	0.211542	0.466814
1700061J05Rik	0.518851	0.598751	0.438952	0.733112	-0.447895	1	1
1700065D16Rik	11.8741	12.2725	11.4756	0.935065	-0.0968609	1	1
1700065I17Rik	1.1176	1.79625	0.438952	0.244371	-2.03286	0.764441	0.990733
1700066B19Rik	1.56648	2.69401	0.438952	0.162936	-2.61762	0.460519	0.769089
1700066M21Rik	347.845	378.784	316.906	0.836639	-0.257323	0.13798	0.3452
1700066O22Rik	0	0	0	NA	NA	NA	NA
1700067K01Rik	3.82022	1.94539	5.69505	2.92747	1.54965	0.357951	0.660015
1700067P10Rik	0	0	0	NA	NA	NA	NA
1700069L16Rik	0	0	0	NA	NA	NA	NA
1700071K01Rik	0	0	0	NA	NA	NA	NA
1700072E05Rik	0	0	0	NA	NA	NA	NA
1700073E17Rik	1.41727	1.34663	1.48791	1.10491	0.143928	1	1
1700074P13Rik	0	0	0	NA	NA	NA	NA
1700080E11Rik	0	0	0	NA	NA	NA	NA
1700080O16Rik	0	0	0	NA	NA	NA	NA
1700081L11Rik	1813.06	2015.58	1610.55	0.79905	-0.323642	0.00781912	0.0386723
1700084C01Rik	9.98102	9.27879	10.6833	1.15136	0.203343	0.887546	1
1700084E18Rik	4.9633	4.9384	4.9882	1.01008	0.0144766	1	1
1700084J12Rik	0.443915	0.448878	0.438952	0.977886	-0.0322622	1	1
1700086L19Rik	39.7057	37.2658	42.1457	1.13095	0.177533	0.617225	0.900082
1700086O06Rik	70.4507	73.6323	67.2691	0.91358	-0.130396	0.722246	0.969738
1700088E04Rik	10.4687	8.68078	12.2567	1.41193	0.497673	0.554521	0.855235
1700090G07Rik	0	0	0	NA	NA	NA	NA
1700092M07Rik	3.46117	2.54414	4.3782	1.7209	0.783161	0.709083	0.96485
1700093K21Rik	2.61411	4.78927	0.438952	0.0916531	-3.44767	0.153895	0.371985
1700094C09Rik	0	0	0	NA	NA	NA	NA
1700094D03Rik	204.772	229.873	179.671	0.781609	-0.355481	0.0865006	0.244671
1700096J18Rik	3.79768	3.74164	3.85372	1.02996	0.0425813	1	1
1700096K18Rik	39.0708	33.8239	44.3178	1.31025	0.389843	0.332726	0.630623
1700101E01Rik	11.4759	6.58478	16.367	2.48558	1.31358	0.189733	0.431382
1700102P08Rik	34.0295	39.5094	28.5495	0.722599	-0.468733	0.293462	0.581033
1700106J16Rik	0	0	0	NA	NA	NA	NA
1700106N22Rik	148.027	150.554	145.501	0.966436	-0.0492533	0.813823	1
1700108F19Rik	1.00057	0.598751	1.40238	2.34218	1.22785	0.82945	1
1700108J01Rik	0	0	0	NA	NA	NA	NA
1700108M19Rik	0	0	0	NA	NA	NA	NA
1700109F18Rik	2.11284	1.94539	2.28028	1.17215	0.229158	1	1
1700109G14Rik	1.63608	2.39426	0.877903	0.366669	-1.44745	0.649994	0.925888
1700109H08Rik	16.6667	17.2117	16.1217	0.936673	-0.0943821	1	1
1700110M21Rik	0	0	0	NA	NA	NA	NA
1700111N16Rik	0.219476	0	0.438952	Inf	Inf	1	1
1700112E06Rik	2.26767	2.69401	1.84133	0.683492	-0.549004	0.951744	1
1700113H08Rik	1.15503	1.34663	0.96343	0.715435	-0.483106	0.963806	1
1700113I22Rik	41.1132	35.0184	47.2081	1.34809	0.430919	0.366978	0.670136
1700120K04Rik	9.63363	9.27953	9.98773	1.07632	0.106104	0.878011	1
1700121N20Rik	0	0	0	NA	NA	NA	NA
1700123I01Rik	1.66892	1.49651	1.84133	1.23042	0.299151	1	1
1700123K08Rik	5.40692	6.43565	4.3782	0.680304	-0.555748	0.733009	0.976647
1700123L14Rik	0	0	0	NA	NA	NA	NA
1700123O20Rik	402.205	444.932	359.479	0.807942	-0.307677	0.0619046	0.189579
1700125D06Rik	2.3953	3.74164	1.04896	0.280347	-1.83472	0.406154	0.714701
1700125H20Rik	12.6117	12.8698	12.3535	0.959884	-0.0590674	0.945218	1
1700128F08Rik	5.70163	5.53715	5.86611	1.05941	0.0832593	1	1
1700129C05Rik	0	0	0	NA	NA	NA	NA
1810006K21Rik	657.939	501.654	814.223	1.62308	0.69873	1.64178e-06	3.8226e-05
1810008A18Rik	510.926	635.893	385.958	0.606954	-0.72034	5.68242e-06	0.000106342
1810009A15Rik	191.595	152.65	230.539	1.51024	0.594779	0.00554705	0.0296073
1810009J06Rik	0	0	0	NA	NA	NA	NA
1810010D01Rik	0	0	0	NA	NA	NA	NA
1810010H24Rik	35.2012	34.1229	36.2796	1.0632	0.0884167	0.77984	0.997623
1810011H11Rik	0.262239	0	0.524479	Inf	Inf	1	1
1810011O10Rik	6.65513	4.6394	8.67087	1.86897	0.90224	0.437384	0.746731
1810012P15Rik	568.598	630.5	506.695	0.80364	-0.315379	0.0334925	0.118265
1810013D10Rik	136.183	126.756	145.609	1.14873	0.200037	0.457876	0.766877
1810013L24Rik	1481.1	1705.79	1256.4	0.736547	-0.44115	0.000492366	0.00421379
1810014B01Rik	31.7204	27.5374	35.9035	1.30381	0.382733	0.436908	0.746271
1810014F10Rik	82.2158	82.164	82.2676	1.00126	0.00181869	0.921566	1
1810019J16Rik	3.36932	3.59177	3.14687	0.876135	-0.190775	0.942175	1
1810020D17Rik	255.563	228.979	282.148	1.2322	0.301236	0.100416	0.273583
1810022C23Rik	0	0	0	NA	NA	NA	NA
1810022K09Rik	547.381	450.029	644.733	1.43265	0.518685	0.000411866	0.00364932
1810024B03Rik	1.92057	1.64638	2.19476	1.33308	0.414764	0.895262	1
1810026B05Rik	569.613	660.441	478.784	0.724947	-0.464052	0.00226274	0.0144159
1810026J23Rik	1946.57	2145.18	1747.95	0.814825	-0.295437	0.0188216	0.0759363
1810027O10Rik	752.519	640.242	864.795	1.35073	0.433742	0.0181958	0.074042
1810029B16Rik	159.903	161.78	158.025	0.97679	-0.0338798	0.90735	1
1810030J14Rik	0.486678	0.448878	0.524479	1.16842	0.22456	1	1
1810030N24Rik	273.736	256.665	290.807	1.13302	0.180179	0.321203	0.615459
1810030O07Rik	482.607	451.222	513.992	1.13911	0.18791	0.215401	0.472778
1810031K17Rik	1073.58	1125.56	1021.6	0.907638	-0.139811	0.258359	0.532793
1810032O08Rik	295.926	339.121	252.732	0.745256	-0.424193	0.0187319	0.0756436
1810033B17Rik	4.21372	5.53715	2.89029	0.521981	-0.93793	0.528259	0.833123
1810035L17Rik	250.334	204.433	296.235	1.44905	0.535111	0.00541126	0.0291418
1810037I17Rik	560.794	408.272	713.316	1.74716	0.80501	0.0264981	0.0988009
1810041L15Rik	327.46	336.574	318.347	0.945845	-0.0803237	0.72184	0.969312
1810043G02Rik	403.959	414.406	393.512	0.949582	-0.0746358	0.72584	0.971638
1810043H04Rik	66.6992	49.8366	83.5618	1.67672	0.745639	0.0230637	0.0886586
1810046J19Rik	1155.69	1098.63	1212.75	1.10388	0.142581	0.278704	0.560557
1810046K07Rik	0.299376	0.598751	0	0	#NAME?	0.983978	1
1810048J11Rik	690.683	731.366	650.001	0.88875	-0.170151	0.211219	0.466501
1810049H13Rik	52.2752	56.8695	47.681	0.838428	-0.254242	0.55712	0.857452
1810055G02Rik	362.235	325.201	399.27	1.22777	0.296035	0.100408	0.273583
1810058I24Rik	534.216	437.597	630.835	1.44159	0.527659	0.000693511	0.00554009
1810062O18Rik	2.16056	2.39426	1.92686	0.804782	-0.31333	0.95134	1
1810063B05Rik	100.757	80.8173	120.697	1.49345	0.578649	0.0291783	0.106565
1810063B07Rik	91.8927	79.467	104.318	1.31273	0.392565	0.194983	0.440205
1810064F22Rik	7.30058	7.33266	7.26849	0.991248	-0.0126821	0.992703	1
1810065E05Rik	0	0	0	NA	NA	NA	NA
1810074P20Rik	602.337	611.942	592.731	0.968605	-0.046019	0.732822	0.976625
2010000I03Rik	53.8489	55.2224	52.4755	0.950258	-0.0736095	0.829251	1
2010001E11Rik	2.81403	1.94539	3.68267	1.89303	0.920694	0.686749	0.949974
2010001M06Rik	27.6714	23.1962	32.1466	1.38585	0.470776	0.397423	0.705247
2010001M09Rik	4.76111	3.74164	5.78058	1.54493	0.627544	0.665276	0.93735
2010002M12Rik	1.71168	1.49651	1.92686	1.28757	0.364652	1	1
2010002N04Rik	21.4244	16.9105	25.9384	1.53387	0.617174	0.314597	0.608044
2010003K11Rik	0	0	0	NA	NA	NA	NA
2010003K15Rik	0	0	0	NA	NA	NA	NA
2010005H15Rik	0.486678	0.448878	0.524479	1.16842	0.22456	1	1
2010007H12Rik	174.133	164.473	183.793	1.11746	0.160224	0.461843	0.770297
2010011I20Rik	251.955	236.607	267.303	1.12973	0.175982	0.353066	0.654561
2010012O05Rik	301.43	295.276	307.584	1.04169	0.0589201	0.703177	0.961904
2010015L04Rik	93.6847	94.4299	92.9396	0.984218	-0.0229502	0.834693	1
2010016I18Rik	0.224439	0.448878	0	0	#NAME?	0.983977	1
2010106E10Rik	1.71168	1.49651	1.92686	1.28757	0.364652	1	1
2010106G01Rik	807.144	627.513	986.775	1.57252	0.653076	0.000888956	0.00675712
2010107E04Rik	1636.01	1447.2	1824.82	1.26093	0.334489	0.00560598	0.0298422
2010107G12Rik	9.69091	10.6254	8.7564	0.824098	-0.279111	0.758004	0.989764
2010107G23Rik	529.517	497.914	561.12	1.12694	0.172413	0.225846	0.487909
2010107H07Rik	55.3482	46.8421	63.8543	1.36318	0.446978	0.238996	0.506828
2010109I03Rik	11.1828	13.1703	9.19535	0.698188	-0.518312	0.57213	0.868522
2010109K11Rik	64.8075	36.5157	93.0993	2.54957	1.35025	0.000114376	0.00127149
2010110P09Rik	0	0	0	NA	NA	NA	NA
2010111I01Rik	55.6854	55.2239	56.1468	1.01671	0.0239129	0.969032	1
2010204K13Rik	31.0186	20.3531	41.6841	2.04805	1.03425	0.0379667	0.129761
2010300C02Rik	148.16	153.699	142.622	0.927929	-0.107914	0.68853	0.950975
2010305A19Rik	162.437	179.585	145.289	0.809026	-0.305742	0.193836	0.43833
2010317E24Rik	25.2072	18.108	32.3064	1.7841	0.835194	0.157636	0.378384
2010320M18Rik	103.565	91.5934	115.537	1.26142	0.335045	0.179067	0.414088
2010321M09Rik	403.014	376.539	429.49	1.14063	0.189825	0.246573	0.517349
2200001I15Rik	0.262239	0	0.524479	Inf	Inf	1	1
2200002D01Rik	6.37627	4.78853	7.96402	1.66315	0.733915	0.651767	0.927239
2200002J24Rik	0	0	0	NA	NA	NA	NA
2200002K05Rik	28.8473	32.4743	25.2202	0.776622	-0.364716	0.401706	0.70958
2210009G21Rik	288.065	368.605	207.525	0.563001	-0.82879	6.87226e-06	0.000124684
2210010C04Rik	0	0	0	NA	NA	NA	NA
2210010C17Rik	5.43443	5.08827	5.78058	1.13606	0.184038	0.980495	1
2210012G02Rik	403.637	465.582	341.692	0.733902	-0.44634	0.00801395	0.0393638
2210013O21Rik	855.094	747.084	963.104	1.28915	0.366422	0.0100344	0.0471206
2210015D19Rik	146.324	131.099	161.548	1.23226	0.301306	0.201424	0.451236
2210016F16Rik	39.7268	35.3182	44.1354	1.24965	0.321526	0.530449	0.834968
2210016L21Rik	1775.81	1822.52	1729.1	0.948745	-0.0759079	0.544606	0.847102
2210018M11Rik	652.106	772.673	531.539	0.687923	-0.539681	0.00017603	0.00181351
2210020M01Rik	0.711117	0.897756	0.524479	0.58421	-0.77544	0.972299	1
2210021J22Rik	63.8271	54.3254	73.3288	1.34981	0.432755	0.19966	0.448232
2210403K04Rik	82.6239	54.0256	111.222	2.05869	1.04173	0.000820653	0.00633367
2210404J11Rik	171.342	164.17	178.514	1.08737	0.120846	0.688004	0.950681
2210404O07Rik	3.46613	2.99302	3.93925	1.31615	0.39632	0.942108	1
2210407C18Rik	0.481715	0	0.96343	Inf	Inf	0.773607	0.992755
2210408I21Rik	224.623	290.93	158.316	0.544171	-0.877868	1.18967e-05	0.000194829
2210409E12Rik	1.57277	1.04763	2.09791	2.00253	1.00183	0.863035	1
2210411K11Rik	7.46306	4.9384	9.98773	2.02246	1.01611	0.361612	0.664043
2210415F13Rik	0	0	0	NA	NA	NA	NA
2210417A02Rik	0	0	0	NA	NA	NA	NA
2300002M23Rik	0	0	0	NA	NA	NA	NA
2300003K06Rik	0	0	0	NA	NA	NA	NA
2300005B03Rik	0	0	0	NA	NA	NA	NA
2300009A05Rik	82.103	64.9501	99.2559	1.52819	0.611822	0.0476639	0.155212
2310001A20Rik	801.446	789.581	813.311	1.03005	0.04272	0.85579	1
2310001K24Rik	0.224439	0.448878	0	0	#NAME?	0.983977	1
2310002J15Rik	0.968393	0.448878	1.48791	3.31473	1.72889	0.832425	1
2310002L09Rik	0	0	0	NA	NA	NA	NA
2310003C23Rik	535.611	536.52	534.702	0.996613	-0.00489536	0.994715	1
2310003F16Rik	787.04	614.789	959.291	1.56036	0.641876	7.72226e-06	0.000137337
2310003H01Rik	1185.03	1246.96	1123.11	0.900676	-0.15092	0.448111	0.757902
2310003L22Rik	660.753	696.81	624.695	0.896507	-0.157613	0.320587	0.614934
2310004I24Rik	175.368	210.565	140.17	0.665685	-0.587088	0.00685556	0.0348845
2310004N24Rik	368.858	359.476	378.239	1.0522	0.0734024	0.625155	0.906874
2310005G13Rik	1.11227	1.34663	0.877903	0.651924	-0.617225	0.963609	1
2310007A19Rik	6.82518	6.28504	7.36533	1.17188	0.22883	0.923798	1
2310007B03Rik	2.97449	2.09526	3.85372	1.83926	0.879123	0.678997	0.945063
2310007L24Rik	0.299376	0.598751	0	0	#NAME?	0.983978	1
2310008H04Rik	152.536	125.713	179.358	1.42672	0.512703	0.0295512	0.107577
2310008H09Rik	637.747	620.181	655.314	1.05665	0.0794959	0.549484	0.851159
2310009B15Rik	83.5027	68.9922	98.0133	1.42064	0.506544	0.0930756	0.25827
2310010M20Rik	15.4592	13.3202	17.5983	1.32118	0.401825	0.56392	0.86287
2310011J03Rik	231.621	214.01	249.232	1.16458	0.219807	0.258665	0.532968
2310014H01Rik	424.68	263.252	586.109	2.22642	1.15473	0.018536	0.0750362
2310014L17Rik	156.656	160.287	153.026	0.9547	-0.06688	0.853255	1
2310015A10Rik	65.1715	52.978	77.3649	1.46032	0.546287	0.10407	0.280777
2310016C08Rik	31.8481	12.7199	50.9763	4.00759	2.00273	0.000100223	0.00114383
2310016M24Rik	435.683	369.808	501.558	1.35627	0.439641	0.00462744	0.0256103
2310021H06Rik	0	0	0	NA	NA	NA	NA
2310021P13Rik	3762.68	4165.81	3359.55	0.806459	-0.310327	0.00622503	0.0322597
2310022A10Rik	387.169	444.624	329.714	0.741558	-0.431368	0.0144706	0.0623814
2310022B05Rik	733.862	514.818	952.907	1.85096	0.888273	1.84532e-06	4.20938e-05
2310028H24Rik	1749.62	1912.62	1586.62	0.829552	-0.269595	0.0369064	0.127201
2310028O11Rik	1589.57	1390.62	1788.52	1.28613	0.363036	0.00339954	0.0200212
2310030G06Rik	5.06049	4.34039	5.78058	1.33181	0.413389	0.771436	0.992755
2310030N02Rik	120.377	128.556	112.197	0.872744	-0.19637	0.445571	0.755377
2310033E01Rik	0	0	0	NA	NA	NA	NA
2310033P09Rik	148.552	133.343	163.76	1.22812	0.296448	0.309864	0.602587
2310034C09Rik	0	0	0	NA	NA	NA	NA
2310035C23Rik	1627.93	2028.74	1227.13	0.604873	-0.725295	7.3394e-09	3.78494e-07
2310035K24Rik	99.7448	92.7827	106.707	1.15007	0.201724	0.647485	0.923777
2310036O22Rik	810.82	804.115	817.525	1.01668	0.0238602	0.869685	1
2310037I24Rik	1753.64	1939.11	1568.18	0.808708	-0.306308	0.0162455	0.0680445
2310039H08Rik	89.4166	77.5246	101.309	1.30679	0.386031	0.333615	0.631906
2310042D19Rik	128.921	139.477	118.365	0.848632	-0.236789	0.313426	0.606825
2310042E22Rik	0	0	0	NA	NA	NA	NA
2310043J07Rik	1.10234	0.448878	1.75581	3.91154	1.96774	0.68514	0.948768
2310044G17Rik	969.682	1186.78	752.586	0.634143	-0.657121	1.21346e-06	2.95534e-05
2310044H10Rik	2316.79	1744.99	2888.58	1.65535	0.72714	2.6329e-09	1.64559e-07
2310045N01Rik	275.994	242.146	309.842	1.27957	0.355658	0.0554421	0.174205
2310046A06Rik	2.64228	2.39426	2.89029	1.20717	0.271632	1	1
2310046K01Rik	2.19836	1.94539	2.45134	1.26008	0.333514	1	1
2310046O06Rik	348.193	334.787	361.599	1.08009	0.111147	0.482881	0.792314
2310047B19Rik	198.747	203.982	193.512	0.948673	-0.0760167	0.721527	0.969036
2310047M10Rik	354.367	395.847	312.886	0.79042	-0.339308	0.0672337	0.201982
2310050B05Rik	5.04952	4.48952	5.60953	1.24947	0.321317	0.881241	1
2310050C09Rik	0.262239	0	0.524479	Inf	Inf	1	1
2310057J16Rik	1890.23	2389.12	1391.35	0.582369	-0.779995	3.43154e-07	1.02763e-05
2310057J18Rik	0	0	0	NA	NA	NA	NA
2310057M21Rik	214.132	249.472	178.793	0.716687	-0.480585	0.0185169	0.0749925
2310057N15Rik	0	0	0	NA	NA	NA	NA
2310061C15Rik	91.3195	88.7473	93.8917	1.05797	0.0812944	0.801501	1
2310061I04Rik	643.768	641.879	645.657	1.00589	0.00846667	0.942995	1
2310061J03Rik	16.2274	16.6122	15.8425	0.953668	-0.0684415	0.928694	1
2310061N02Rik	0	0	0	NA	NA	NA	NA
2310067B10Rik	963.444	966.465	960.424	0.99375	-0.00904586	0.860336	1
2310068J16Rik	6.34678	9.27879	3.41477	0.368019	-1.44215	0.204324	0.455408
2310079F23Rik	119.754	144.117	95.3909	0.661898	-0.59532	0.0159427	0.0670572
2310079G19Rik	0	0	0	NA	NA	NA	NA
2310079N02Rik	212.628	201.439	223.818	1.1111	0.151983	0.458979	0.767732
2400001E08Rik	1054.39	964.838	1143.94	1.18563	0.245651	0.0742898	0.217551
2400003C14Rik	1960.3	2073.8	1846.81	0.890542	-0.167245	0.193925	0.43842
2410001C21Rik	1288.62	1394.79	1182.45	0.84776	-0.238272	0.0585844	0.181856
2410002F23Rik	1834.49	2016.33	1652.66	0.819636	-0.286945	0.0215869	0.0842596
2410002I01Rik	229.755	268.632	190.879	0.710559	-0.492974	0.0111155	0.0511129
2410002O22Rik	885.069	936.857	833.28	0.889442	-0.169028	0.239207	0.50708
2410003K15Rik	133.901	127.364	140.438	1.10265	0.140976	0.561271	0.860679
2410004A20Rik	0.711117	0.897756	0.524479	0.58421	-0.77544	0.972299	1
2410004B18Rik	500.85	507.792	493.909	0.97266	-0.0399918	0.817333	1
2410006H16Rik	1314.43	1190.09	1438.78	1.20897	0.273775	0.027873	0.102892
2410012M07Rik	0	0	0	NA	NA	NA	NA
2410015M20Rik	536.644	444.037	629.251	1.41711	0.502955	0.000995338	0.00741784
2410016O06Rik	78.5782	99.0715	58.085	0.586294	-0.770304	0.0111321	0.0511503
2410017I17Rik	0	0	0	NA	NA	NA	NA
2410018L13Rik	540.566	604.162	476.971	0.789475	-0.341034	0.0272475	0.101134
2410022L05Rik	658.018	615.39	700.646	1.13854	0.187185	0.195575	0.441429
2410042D21Rik	318.358	299.31	337.406	1.12728	0.172845	0.395025	0.701911
2410066E13Rik	1358.47	1450.63	1266.3	0.872934	-0.196055	0.150321	0.36568
2410075B13Rik	155.132	180.487	129.778	0.719042	-0.475853	0.0481	0.156349
2410076I21Rik	48.2246	54.7765	41.6728	0.760778	-0.394452	0.420655	0.730928
2410089E03Rik	1973.48	2444.64	1502.32	0.614538	-0.702425	8.52027e-09	4.31966e-07
2410091C18Rik	381.234	385.967	376.501	0.975475	-0.0358227	0.853073	1
2410127L17Rik	145.653	117.182	174.124	1.48593	0.571361	0.0158416	0.0668149
2410131K14Rik	712.568	792.575	632.561	0.798109	-0.325342	0.0734652	0.215839
2410137F16Rik	9.52119	8.53017	10.5122	1.23236	0.301419	0.814618	1
2410137M14Rik	10.67	12.5723	8.76771	0.697384	-0.519975	0.72968	0.974242
2500003M10Rik	3300.98	3715.85	2886.1	0.776701	-0.364568	0.0019196	0.0126599
2510002D24Rik	185.139	177.342	192.936	1.08793	0.121587	0.561702	0.860811
2510003E04Rik	1563.1	1729.42	1396.77	0.807648	-0.308202	0.0131022	0.0578541
2510006D16Rik	831.48	793.041	869.919	1.09694	0.133486	0.308568	0.60104
2510009E07Rik	1244.76	1356.8	1132.73	0.834854	-0.260403	0.0533175	0.169309
2510012J08Rik	410.877	438.645	383.108	0.87339	-0.195303	0.251784	0.524612
2510039O18Rik	632.909	564.499	701.319	1.24237	0.313099	0.0423095	0.14099
2510049J12Rik	22.8878	29.4828	16.2928	0.552621	-0.855638	0.131228	0.332327
2610001J05Rik	249.567	174.499	324.636	1.86038	0.8956	4.93883e-06	9.50686e-05
2610002D18Rik	2.19406	0.448878	3.93925	8.77576	3.13352	0.259448	0.534211
2610002I17Rik	320.548	339.571	301.525	0.887957	-0.171439	0.33657	0.634974
2610002J02Rik	255.12	232.715	277.524	1.19255	0.254052	0.19914	0.447511
2610002M06Rik	1366.34	1435.5	1297.17	0.90364	-0.14618	0.248189	0.519288
2610005L07Rik	1949.6	2340.77	1558.42	0.665772	-0.586899	1.72576e-06	3.99231e-05
2610008E11Rik	626.344	686.766	565.921	0.824037	-0.279219	0.0423215	0.141004
2610015P09Rik	88.1899	87.4021	88.9777	1.01803	0.0257751	0.916806	1
2610017I09Rik	339.415	287.192	391.637	1.36368	0.4475	0.0108833	0.0502638
2610018G03Rik	58.2569	38.1628	78.351	2.05307	1.03778	0.0118772	0.0537237
2610019F03Rik	25.4178	17.3608	33.4748	1.92818	0.94724	0.0602308	0.185718
2610020H08Rik	85.9696	77.0727	94.8664	1.23087	0.299677	0.334358	0.632585
2610021K21Rik	12.3041	9.27879	15.3294	1.65209	0.724288	0.363081	0.665628
2610024G14Rik	530.726	630.503	430.949	0.6835	-0.548987	0.000390265	0.00349975
2610027L16Rik	202.638	180.484	224.792	1.2455	0.316723	0.143241	0.354127
2610028E06Rik	5.94832	5.23815	6.65848	1.27115	0.346137	0.805283	1
2610028H24Rik	0.299376	0.598751	0	0	#NAME?	0.983978	1
2610029G23Rik	292.52	242.002	343.038	1.4175	0.50335	0.00393936	0.0225224
2610029I01Rik	175.319	158.335	192.304	1.21453	0.280404	0.212954	0.469181
2610034B18Rik	67.9284	67.7954	68.0614	1.00392	0.00564951	0.991413	1
2610034M16Rik	3.14058	1.64638	4.63478	2.81513	1.4932	0.549995	0.851363
2610035D17Rik	136.817	177.644	95.9896	0.540347	-0.888043	0.00024842	0.00240032
2610039C10Rik	130.848	118.83	142.867	1.20228	0.265778	0.263797	0.540016
2610044O15Rik	210.913	212.215	209.611	0.987729	-0.0178122	0.959524	1
2610100L16Rik	121.354	117.331	125.377	1.06857	0.0956877	0.699981	0.959574
2610101N10Rik	1815.07	2067.07	1563.07	0.75618	-0.403199	0.00143415	0.0099621
2610109H07Rik	886.769	754.428	1019.11	1.35084	0.433853	0.00153411	0.0105547
2610203C20Rik	843.269	721.188	965.351	1.33856	0.420677	0.0038018	0.021917
2610203C22Rik	0.518851	0.598751	0.438952	0.733112	-0.447895	1	1
2610204G22Rik	4.97629	2.24513	7.70744	3.43296	1.77945	0.167577	0.394513
2610301B20Rik	452.266	401.081	503.451	1.25524	0.327958	0.0400961	0.135445
2610301G19Rik	2106.79	2322.66	1890.92	0.814116	-0.296694	0.014613	0.0628594
2610305D13Rik	20.3579	18.5568	22.1589	1.19411	0.255934	0.75561	0.989409
2610306M01Rik	82.0271	67.3465	96.7077	1.43597	0.522028	0.0777228	0.225122
2610318N02Rik	8.13542	8.38104	7.88981	0.941389	-0.0871376	1	1
2610507B11Rik	3219.48	3087.11	3351.84	1.08575	0.118698	0.340204	0.639024
2610524H06Rik	445.537	414.25	476.824	1.15105	0.202955	0.234805	0.50051
2610528E23Rik	133.623	138.586	128.661	0.928381	-0.107211	0.723469	0.970051
2610528J11Rik	0	0	0	NA	NA	NA	NA
2700007P21Rik	582.021	618.223	545.82	0.882885	-0.179703	0.188242	0.42874
2700023E23Rik	93.1928	66.4473	119.938	1.80501	0.852009	0.00290757	0.0176315
2700029M09Rik	733.852	728.24	739.463	1.01541	0.0220625	0.797246	1
2700046A07Rik	0	0	0	NA	NA	NA	NA
2700046G09Rik	35.9561	42.2057	29.7066	0.703853	-0.506653	0.424253	0.734808
2700049A03Rik	267.161	323.406	210.917	0.652174	-0.616671	0.000798689	0.00619337
2700050L05Rik	741.763	904.968	578.559	0.639314	-0.645403	5.36198e-06	0.000101264
2700060E02Rik	1674.67	1587.89	1761.45	1.10931	0.149656	0.348448	0.648807
2700062C07Rik	218.218	228.227	208.209	0.912288	-0.132439	0.510372	0.816867
2700078E11Rik	1276.58	1277.62	1275.53	0.998369	-0.0023545	0.941865	1
2700078K21Rik	404.649	405.125	404.173	0.99765	-0.00339397	0.997357	1
2700081O15Rik	1544.16	1435.23	1653.08	1.15179	0.203881	0.0927181	0.257522
2700086A05Rik	52.126	46.5431	57.709	1.2399	0.310228	0.455146	0.764581
2700089E24Rik	1308.21	1400.2	1216.22	0.8686	-0.203236	0.139817	0.348294
2700094K13Rik	870.57	747.11	994.031	1.3305	0.411971	0.0201464	0.0799249
2700097O09Rik	120.891	134.392	107.391	0.799089	-0.323573	0.199184	0.447555
2700099C18Rik	80.988	74.2296	87.7463	1.18209	0.241345	0.482985	0.792409
2810001G20Rik	254.152	241.549	266.756	1.10435	0.143203	0.417417	0.727959
2810002D19Rik	82.9874	78.1204	87.8545	1.1246	0.169418	0.616981	0.899873
2810002N01Rik	463.456	448.224	478.688	1.06796	0.0948634	0.565766	0.864109
2810004N23Rik	126.32	103.712	148.927	1.43596	0.522014	0.0363335	0.12578
2810006K23Rik	136.481	137.684	135.279	0.982533	-0.0254228	0.952386	1
2810007J24Rik	0	0	0	NA	NA	NA	NA
2810008D09Rik	257.186	231.518	282.855	1.22174	0.288937	0.142233	0.352314
2810008M24Rik	453.919	364.122	543.717	1.49323	0.578434	0.00283069	0.0172408
2810021B07Rik	221.723	207.127	236.32	1.14094	0.190222	0.341835	0.64087
2810021J22Rik	253.495	304.551	202.44	0.664716	-0.58919	0.00195443	0.0128332
2810025M15Rik	436.52	428.917	444.124	1.03545	0.0502638	0.77284	0.992755
2810030E01Rik	94.1986	107.908	80.4892	0.745905	-0.422936	0.37652	0.680466
2810032G03Rik	108.931	102.217	115.646	1.13137	0.17807	0.459988	0.768554
2810046L04Rik	269.016	258.604	279.429	1.08053	0.111734	0.616719	0.899763
2810047C21Rik1	4.17229	3.44189	4.90268	1.42441	0.510367	0.851606	1
2810055F11Rik	55.3667	51.3316	59.4019	1.15722	0.210661	0.585931	0.876681
2810055G20Rik	11.4484	8.53091	14.3659	1.68399	0.75188	0.33345	0.631663
2810403A07Rik	2284.55	2507.06	2062.05	0.822496	-0.281919	0.0193527	0.0775229
2810403D21Rik	10.6398	9.27953	12.0001	1.29318	0.370924	0.624939	0.906874
2810405F15Rik	60.5707	64.3506	56.7908	0.882522	-0.180296	0.626923	0.908336
2810405K02Rik	165.796	139.482	192.11	1.37731	0.46185	0.0337205	0.118751
2810407C02Rik	5899.07	6252.98	5545.16	0.886802	-0.173315	0.138497	0.346108
2810408A11Rik	64.6019	56.5705	72.6333	1.28394	0.360581	0.271165	0.550031
2810408M09Rik	59.7408	43.1027	76.3789	1.77202	0.825396	0.0149789	0.064051
2810410L24Rik	205.341	188.568	222.113	1.17789	0.236211	0.276296	0.557173
2810417H13Rik	217.524	141.578	293.47	2.07286	1.05162	9.32379e-05	0.00107708
2810422J05Rik	379.82	361.122	398.518	1.10355	0.142158	0.438636	0.747884
2810422O20Rik	32.6808	39.5087	25.8529	0.654359	-0.611845	0.1941	0.438704
2810428I15Rik	425.447	407.819	443.075	1.08645	0.119622	0.440778	0.750177
2810429I04Rik	17.8774	14.8159	20.9389	1.41327	0.499034	0.449144	0.758645
2810432D09Rik	143.52	159.684	127.355	0.797544	-0.326363	0.161844	0.38535
2810432L12Rik	1967.16	2352.9	1581.42	0.672118	-0.573214	3.61397e-06	7.29196e-05
2810433D01Rik	10.8443	6.88379	14.8049	2.15069	1.1048	0.216598	0.47461
2810442I21Rik	8.17389	6.88453	9.46325	1.37457	0.458978	0.632748	0.912809
2810453I06Rik	864.911	875.346	854.476	0.976157	-0.0348146	0.829472	1
2810454H06Rik	27.9248	21.2516	34.598	1.62802	0.703116	0.163508	0.388082
2810459M11Rik	98.1869	65.3989	130.975	2.00271	1.00195	0.000424845	0.00374271
2810474O19Rik	370.448	279.561	461.336	1.65022	0.722657	0.109279	0.291378
2900002K06Rik	16.9003	18.5568	15.2438	0.821467	-0.283726	0.660388	0.933468
2900005J15Rik	7.99184	6.43491	9.54877	1.4839	0.569396	0.636387	0.915263
2900006K08Rik	75.3224	94.5834	56.0613	0.592718	-0.754582	0.0159183	0.0670014
2900010J23Rik	2377.64	2114.83	2640.44	1.24853	0.320234	0.00568272	0.0301561
2900010M23Rik	720.776	640.841	800.712	1.24947	0.321318	0.0204161	0.0806341
2900011O08Rik	4644.23	4947.5	4340.96	0.877405	-0.188685	0.114974	0.301902
2900026A02Rik	72.9421	60.3099	85.5742	1.41891	0.504781	0.144072	0.355451
2900041M22Rik	0.443915	0.448878	0.438952	0.977886	-0.0322622	1	1
2900052N01Rik	9.51097	8.68078	10.3412	1.19127	0.2525	0.735733	0.978621
2900053A13Rik	167.862	136.785	198.939	1.45439	0.540416	0.0173866	0.0715911
2900060B14Rik	1.48724	1.04763	1.92686	1.83926	0.879123	0.867221	1
2900062L11Rik	1265.8	1116.74	1414.86	1.26695	0.341365	0.00879649	0.0422861
2900064A13Rik	1343.95	1289.59	1398.31	1.0843	0.116764	0.36645	0.669581
2900073G15Rik	1407.36	1009.29	1805.43	1.78881	0.839002	7.64499e-11	8.54625e-09
2900079G21Rik	36.3867	36.6648	36.1085	0.984827	-0.0220575	0.985587	1
2900092C05Rik	0	0	0	NA	NA	NA	NA
2900092D14Rik	165.378	151.449	179.306	1.18394	0.243591	0.3419	0.640925
2900092E17Rik	999.171	1079.02	919.321	0.851995	-0.231084	0.0908045	0.253613
2900097C17Rik	14056.5	15669.9	12443.1	0.794076	-0.33265	0.0031061	0.0186159
3000002C10Rik	27.3343	24.0955	30.5732	1.26883	0.343504	0.479942	0.788858
3010026O09Rik	256.991	305.598	208.385	0.681894	-0.552381	0.0047431	0.0261153
3110001D03Rik	279.925	210.57	349.28	1.65874	0.730085	6.65503e-05	0.000809591
3110001I22Rik	36.3396	35.0199	37.6593	1.07537	0.104831	0.859525	1
3110002H16Rik	406.831	467.831	345.831	0.739222	-0.43592	0.0091333	0.0436256
3110003A17Rik	216.992	134.991	298.994	2.21493	1.14726	3.51813e-06	7.13055e-05
3110007F17Rik	0.957803	0.598751	1.31685	2.19934	1.13707	0.833428	1
3110009E18Rik	30.941	24.9925	36.8896	1.47603	0.561718	0.24107	0.509678
3110021A11Rik	4.58506	2.69401	6.47611	2.40389	1.26537	0.381586	0.685832
3110035E14Rik	180.875	183.482	178.269	0.971586	-0.0415871	0.915368	1
3110039M20Rik	0	0	0	NA	NA	NA	NA
3110040N11Rik	203.085	170.158	236.011	1.38701	0.47198	0.025386	0.0955054
3110043O21Rik	959.409	954.062	964.757	1.01121	0.0160829	0.915778	1
3110047P20Rik	432.638	543.85	321.426	0.591019	-0.758723	3.04432e-06	6.38086e-05
3110048L19Rik	555.418	546.849	563.988	1.03134	0.0445205	0.743713	0.981402
3110049J23Rik	17.2426	20.2047	14.2804	0.706786	-0.500655	0.515773	0.822221
3110052M02Rik	565.26	681.085	449.436	0.659883	-0.599717	7.59936e-05	0.000903987
3110056O03Rik	1145.05	1191.86	1098.23	0.921437	-0.118042	0.372868	0.676431
3110057O12Rik	167.656	207.719	127.594	0.614264	-0.703068	0.016235	0.0680162
3110062M04Rik	36.5445	32.6249	40.4641	1.24028	0.310668	0.527628	0.832785
3110070M22Rik	8.2703	5.68628	10.8543	1.90886	0.93271	0.454272	0.763946
3110079O15Rik	3.08619	2.84314	3.32924	1.17097	0.227707	1	1
3110082D06Rik	79.1897	82.6106	75.7689	0.917181	-0.124722	0.687723	0.950681
3110082I17Rik	64.8496	62.259	67.4401	1.08322	0.115324	0.711548	0.965951
3110099E03Rik	1.15503	1.34663	0.96343	0.715435	-0.483106	0.963806	1
3200002M19Rik	305.068	271.477	338.659	1.24747	0.319005	0.0812453	0.233214
3230401D17Rik	808.124	926.676	689.571	0.744133	-0.426367	0.00190272	0.0125633
3300002I08Rik	16.5828	14.0681	19.0975	1.35751	0.440964	0.503417	0.810566
3425401B19Rik	0.262239	0	0.524479	Inf	Inf	1	1
3632451O06Rik	402.629	379.381	425.876	1.12255	0.166786	0.488574	0.797447
3830403N18Rik	0.518851	0.598751	0.438952	0.733112	-0.447895	1	1
3830406C13Rik	439.977	449.574	430.379	0.957304	-0.0629508	0.74801	0.984724
3830408C21Rik	123.382	125.412	121.352	0.967626	-0.0474792	0.892043	1
3830417A13Rik	0.224439	0.448878	0	0	#NAME?	0.983977	1
3830431G21Rik	223.968	283.744	164.193	0.578667	-0.789194	0.000107686	0.00121111
3930402G23Rik	7.46803	5.38728	9.54877	1.77247	0.825759	0.483161	0.792522
4430402I18Rik	21.9741	27.3875	16.5607	0.60468	-0.725755	0.22303	0.483911
4632411B12Rik	3169.59	3546.1	2793.09	0.787653	-0.344368	0.00325009	0.0193629
4632415K11Rik	179.282	193.504	165.06	0.853006	-0.229372	0.276718	0.557462
4632415L05Rik	363.411	375.188	351.634	0.937222	-0.0935371	0.568649	0.866862
4632427E13Rik	7.71269	7.63241	7.79297	1.02104	0.0300339	1	1
4632428C04Rik	1.40734	0.448878	2.36581	5.2705	2.39794	0.539298	0.842267
4632428N05Rik	13.4213	10.4756	16.367	1.5624	0.643763	0.523487	0.83018
4632434I11Rik	201.156	196.053	206.26	1.05206	0.0732183	0.73522	0.9783
4732415M23Rik	13.8493	11.6738	16.0249	1.37272	0.45704	0.533131	0.837577
4732416N19Rik	0.438952	0	0.877903	Inf	Inf	0.785423	1
4732418C07Rik	333.666	277.462	389.87	1.40513	0.490704	0.00682593	0.0347534
4732456N10Rik	3.44991	3.74164	3.15819	0.844065	-0.244574	1	1
4732471D19Rik	532.874	657.892	407.855	0.619943	-0.689793	7.29722e-06	0.000130942
4732471J01Rik	49.7986	52.8281	46.7691	0.885307	-0.17575	0.608928	0.892103
4831426I19Rik	6.86232	6.88379	6.84085	0.993763	-0.00902586	1	1
4831440E17Rik	47.2693	56.868	37.6706	0.662422	-0.594178	0.111275	0.295343
4832428D23Rik	1.71102	2.54414	0.877903	0.345069	-1.53504	0.645064	0.922001
4833403I15Rik	17.0658	19.606	14.5257	0.74088	-0.432688	0.586761	0.877428
4833413D08Rik	0	0	0	NA	NA	NA	NA
4833418N02Rik	25.1561	22.8972	27.415	1.19731	0.259792	0.681201	0.946154
4833420G17Rik	791.147	842.569	739.726	0.877941	-0.187804	0.170623	0.399958
4833422C13Rik	13.4604	16.7621	10.1588	0.606058	-0.722473	0.34984	0.650641
4833422F24Rik	0	0	0	NA	NA	NA	NA
4833423E24Rik	3.18834	2.69401	3.68267	1.36698	0.450996	0.814767	1
4833424O15Rik	459.32	496.265	422.375	0.851106	-0.232588	0.17067	0.400016
4833427G06Rik	4.05459	3.29202	4.81715	1.46328	0.549207	0.854156	1
4833439L19Rik	2050.79	1871.17	2230.41	1.19199	0.253367	0.0353669	0.123121
4833442J19Rik	68.128	64.9508	71.3051	1.09783	0.134659	0.71441	0.967612
4921501E09Rik	0.561615	0.598751	0.524479	0.875954	-0.191073	1	1
4921504E06Rik	0	0	0	NA	NA	NA	NA
4921506M07Rik	1.52934	2.09526	0.96343	0.459814	-1.12088	0.788876	1
4921507P07Rik	31.2937	33.2229	29.3645	0.883863	-0.178106	0.744895	0.982135
4921509C19Rik	0	0	0	NA	NA	NA	NA
4921510H08Rik	0	0	0	NA	NA	NA	NA
4921511C20Rik	0	0	0	NA	NA	NA	NA
4921511H03Rik	0.219476	0	0.438952	Inf	Inf	1	1
4921513D23Rik	1249.44	1303.07	1195.81	0.917687	-0.123926	0.351657	0.652957
4921515J06Rik	0.219476	0	0.438952	Inf	Inf	1	1
4921517D21Rik	0	0	0	NA	NA	NA	NA
4921517D22Rik	0	0	0	NA	NA	NA	NA
4921517L17Rik	62.0158	64.2022	59.8295	0.931892	-0.101765	0.758277	0.989919
4921521F21Rik	1.23063	0.448878	2.01239	4.48315	2.16451	0.666596	0.938103
4921523A10Rik	13.9438	14.2172	13.6704	0.961539	-0.056582	0.996998	1
4921524J17Rik	346.604	321.461	371.747	1.15643	0.209679	0.259682	0.534461
4921524L21Rik	0	0	0	NA	NA	NA	NA
4921528I01Rik	2.71225	2.09526	3.32924	1.58894	0.668065	0.790319	1
4921528O07Rik	0.663391	0.448878	0.877903	1.95577	0.967738	1	1
4921530D09Rik	5.68541	6.28578	5.08505	0.808977	-0.30583	0.922335	1
4921530L21Rik	0	0	0	NA	NA	NA	NA
4921531C22Rik	24.2912	20.204	28.3784	1.4046	0.490156	0.373164	0.676696
4921533I20Rik	0.481715	0	0.96343	Inf	Inf	0.773607	0.992755
4921536K21Rik	25.7051	34.4219	16.9883	0.493532	-1.01878	0.0549758	0.173203
4921539E11Rik	0	0	0	NA	NA	NA	NA
4922501C03Rik	82.0943	76.6246	87.564	1.14277	0.19253	0.598904	0.885145
4922501L14Rik	10.3378	12.8713	7.80428	0.606332	-0.721819	0.506302	0.813174
4922502D21Rik	0	0	0	NA	NA	NA	NA
4922505E12Rik	0.224439	0.448878	0	0	#NAME?	0.983977	1
4922505G16Rik	10.6199	14.6668	6.57296	0.448152	-1.15794	0.196182	0.442377
4930402F06Rik	0	0	0	NA	NA	NA	NA
4930402H24Rik	1535.86	1457.34	1614.37	1.10775	0.147633	0.290593	0.57721
4930403L05Rik	0	0	0	NA	NA	NA	NA
4930403N07Rik	85.4329	87.851	83.0147	0.944949	-0.0816914	0.831043	1
4930404A10Rik	0.219476	0	0.438952	Inf	Inf	1	1
4930404H21Rik	0.262239	0	0.524479	Inf	Inf	1	1
4930404I05Rik	26.8097	22.4476	31.1719	1.38865	0.473683	0.445601	0.755377
4930404N11Rik	176.036	169.563	182.51	1.07635	0.10615	0.565515	0.864036
4930407I10Rik	0	0	0	NA	NA	NA	NA
4930408F14Rik	0	0	0	NA	NA	NA	NA
4930412C18Rik	1.52438	1.64638	1.40238	0.851797	-0.231419	1	1
4930412F15Rik	9.19898	10.776	7.62191	0.707302	-0.499602	0.683969	0.948315
4930412O13Rik	1.01049	1.49651	0.524479	0.350468	-1.51264	0.767267	0.99237
4930415F15Rik	2.79281	1.64638	3.93925	2.39267	1.25862	0.535469	0.839473
4930415L06Rik	0	0	0	NA	NA	NA	NA
4930417G10Rik	17.5114	17.51	17.5128	1.00016	0.000234092	1	1
4930417O13Rik	0	0	0	NA	NA	NA	NA
4930420K17Rik	15.7003	13.6199	17.7807	1.30549	0.384593	0.520186	0.826694
4930422G04Rik	127.596	135.738	119.454	0.88003	-0.184375	0.4201	0.730527
4930426L09Rik	3.49268	3.74164	3.24371	0.866923	-0.206024	1	1
4930427A07Rik	146.161	135.14	157.181	1.16309	0.217969	0.335639	0.634177
4930428D18Rik	0	0	0	NA	NA	NA	NA
4930428E23Rik	0.701191	0	1.40238	Inf	Inf	0.581712	0.873344
4930429B21Rik	43.3671	43.5508	43.1833	0.991561	-0.0122263	1	1
4930429F11Rik	0	0	0	NA	NA	NA	NA
4930430A15Rik	0	0	0	NA	NA	NA	NA
4930430D24Rik	0	0	0	NA	NA	NA	NA
4930430F08Rik	134.954	139.48	130.428	0.935099	-0.0968083	0.685692	0.949295
4930431A04Rik	1.01116	0.448878	1.57344	3.50526	1.80952	0.828493	1
4930432K09Rik	0	0	0	NA	NA	NA	NA
4930432K21Rik	26.9252	27.3875	26.4629	0.966239	-0.0495473	1	1
4930433I11Rik	0	0	0	NA	NA	NA	NA
4930433N12Rik	4.2734	4.33965	4.20714	0.969466	-0.0447371	1	1
4930434E21Rik	5.52595	4.49026	6.56164	1.4613	0.547256	0.728423	0.973562
4930435E12Rik	0	0	0	NA	NA	NA	NA
4930441O14Rik	10.243	10.3272	10.1588	0.983695	-0.0237168	1	1
4930442L01Rik	0	0	0	NA	NA	NA	NA
4930443G12Rik	0	0	0	NA	NA	NA	NA
4930444A02Rik	562.593	609.849	515.337	0.845023	-0.242937	0.114315	0.300744
4930444G20Rik	2.75998	2.54414	2.97582	1.16968	0.22611	1	1
4930447C04Rik	10.1332	5.98603	14.2804	2.38562	1.25436	0.164816	0.390362
4930448K20Rik	0.219476	0	0.438952	Inf	Inf	1	1
4930449I24Rik	1.26214	1.64638	0.877903	0.533232	-0.907164	0.964254	1
4930451C15Rik	3.09219	2.24513	3.93925	1.75457	0.81112	0.673615	0.941283
4930451I11Rik	0.438952	0	0.877903	Inf	Inf	0.785423	1
4930452B06Rik	92.61	102.365	82.855	0.809408	-0.305062	0.266097	0.542989
4930453N24Rik	179.915	193.659	166.172	0.858064	-0.220842	0.337586	0.636003
4930455C21Rik	246.879	238.403	255.354	1.0711	0.0990963	0.623727	0.906113
4930455F23Rik	355.346	392.254	318.439	0.811818	-0.300773	0.0916451	0.255369
4930458L03Rik	0	0	0	NA	NA	NA	NA
4930465K10Rik	1.87215	1.64638	2.09791	1.27426	0.349658	1	1
4930467E23Rik	4.2777	5.83616	2.71924	0.465929	-1.10182	0.45632	0.765624
4930469G21Rik	0.523815	1.04763	0	0	#NAME?	0.721413	0.969036
4930470P17Rik	0	0	0	NA	NA	NA	NA
4930471G03Rik	0	0	0	NA	NA	NA	NA
4930471M23Rik	293.691	306.945	280.437	0.91364	-0.130302	0.483397	0.792726
4930473A06Rik	31.3398	36.2167	26.4629	0.730682	-0.452684	0.357208	0.658914
4930474M22Rik	0.224439	0.448878	0	0	#NAME?	0.983977	1
4930474N05Rik	0	0	0	NA	NA	NA	NA
4930479M11Rik	0	0	0	NA	NA	NA	NA
4930480E11Rik	0	0	0	NA	NA	NA	NA
4930481A15Rik	7.65437	7.33341	7.97534	1.08754	0.121062	0.928458	1
4930483J18Rik	1.34271	1.1975	1.48791	1.24251	0.313257	1	1
4930486L24Rik	1.11227	1.34663	0.877903	0.651924	-0.617225	0.963609	1
4930488L21Rik	2.11284	1.94539	2.28028	1.17215	0.229158	1	1
4930502E18Rik	0	0	0	NA	NA	NA	NA
4930503B20Rik	0.299376	0.598751	0	0	#NAME?	0.983978	1
4930503E14Rik	1.89869	2.395	1.40238	0.585544	-0.77215	0.959057	1
4930503E24Rik	0	0	0	NA	NA	NA	NA
4930503H13Rik	0	0	0	NA	NA	NA	NA
4930503L19Rik	159.815	167.47	152.159	0.908575	-0.138323	0.621758	0.904056
4930504O13Rik	0	0	0	NA	NA	NA	NA
4930505A04Rik	5.5465	5.8369	5.2561	0.900496	-0.151209	1	1
4930506M07Rik	3541.96	4106.91	2977.01	0.724878	-0.464189	0.000103046	0.00116937
4930507D05Rik	18.5931	23.795	13.3912	0.562773	-0.829375	0.149883	0.365034
4930511I11Rik	0	0	0	NA	NA	NA	NA
4930511M06Rik	121.362	120.175	122.549	1.01975	0.0282206	0.912456	1
4930511M11Rik	0.524479	0	1.04896	Inf	Inf	0.762787	0.990378
4930512B01Rik	3.84607	3.14289	4.54925	1.44748	0.533539	0.830545	1
4930513N10Rik	36.1663	39.0628	33.2698	0.8517	-0.231582	0.751305	0.986646
4930515G01Rik	9.67669	8.23116	11.1222	1.35123	0.434275	0.674397	0.942083
4930515G16Rik	0	0	0	NA	NA	NA	NA
4930519F09Rik	85.744	84.8535	86.6345	1.02099	0.0299668	1	1
4930519F16Rik	0	0	0	NA	NA	NA	NA
4930519G04Rik	5.58393	5.38728	5.78058	1.07301	0.101658	1	1
4930521A18Rik	0	0	0	NA	NA	NA	NA
4930522H14Rik	0	0	0	NA	NA	NA	NA
4930523C07Rik	0.219476	0	0.438952	Inf	Inf	1	1
4930524B15Rik	0.877903	0	1.75581	Inf	Inf	0.497154	0.805453
4930524E20Rik	0	0	0	NA	NA	NA	NA
4930524L23Rik	10.6123	10.1765	11.048	1.08563	0.118537	0.905443	1
4930525F21Rik	0	0	0	NA	NA	NA	NA
4930526D03Rik	0.224439	0.448878	0	0	#NAME?	0.983977	1
4930526I15Rik	0	0	0	NA	NA	NA	NA
4930528A17Rik	25.5181	25.2915	25.7447	1.01792	0.0256238	1	1
4930528F23Rik	2.09162	1.64638	2.53687	1.54087	0.623749	0.889612	1
4930529C04Rik	0	0	0	NA	NA	NA	NA
4930529F22Rik	0	0	0	NA	NA	NA	NA
4930529M08Rik	6.10212	7.03366	5.17058	0.735119	-0.443951	0.744208	0.981695
4930534B04Rik	121.896	128.557	115.236	0.896376	-0.157824	0.573457	0.869494
4930538K18Rik	28.4114	29.9324	26.8905	0.898376	-0.154609	0.832289	1
4930539E08Rik	62.9424	70.787	55.0979	0.778362	-0.361487	0.272386	0.551948
4930539J05Rik	34.1439	37.7147	30.5732	0.810645	-0.302859	0.569885	0.866862
4930542N07Rik	0	0	0	NA	NA	NA	NA
4930544D05Rik	0.523815	1.04763	0	0	#NAME?	0.721413	0.969036
4930544G11Rik	0	0	0	NA	NA	NA	NA
4930544O15Rik	5.23786	3.29276	7.18296	2.18144	1.12528	0.358312	0.660342
4930547C10Rik	0	0	0	NA	NA	NA	NA
4930547N16Rik	59.0462	48.6398	69.4525	1.42789	0.513888	0.133811	0.337348
4930548H24Rik	1.30491	1.64638	0.96343	0.585181	-0.773046	0.964417	1
4930549C01Rik	0	0	0	NA	NA	NA	NA
4930550C14Rik	3.95215	4.48952	3.41477	0.760608	-0.394774	0.825391	1
4930550L24Rik	2.086	2.24513	1.92686	0.858239	-0.220548	1	1
4930555G01Rik	38.2575	40.2581	36.2569	0.900613	-0.151021	0.737681	0.978802
4930555I21Rik	0.523815	1.04763	0	0	#NAME?	0.721413	0.969036
4930558C23Rik	0	0	0	NA	NA	NA	NA
4930562C15Rik	3.45984	4.6394	2.28028	0.491505	-1.02472	0.600292	0.886159
4930563D23Rik	0	0	0	NA	NA	NA	NA
4930563E22Rik	162.299	162.976	161.622	0.991693	-0.0120343	0.963754	1
4930567H12Rik	0.219476	0	0.438952	Inf	Inf	1	1
4930567H17Rik	0	0	0	NA	NA	NA	NA
4930568D16Rik	0	0	0	NA	NA	NA	NA
4930571K23Rik	0	0	0	NA	NA	NA	NA
4930572J05Rik	40.083	24.5436	55.6224	2.26627	1.18032	0.00609509	0.031705
4930578C19Rik	0	0	0	NA	NA	NA	NA
4930578I06Rik	0.299376	0.598751	0	0	#NAME?	0.983978	1
4930578N16Rik	34.5552	45.1957	23.9147	0.529136	-0.918288	0.0394975	0.133774
4930579C15Rik	5.43443	5.08827	5.78058	1.13606	0.184038	0.980495	1
4930579F01Rik	0.224439	0.448878	0	0	#NAME?	0.983977	1
4930579G22Rik	4.33208	4.6394	4.02477	0.867521	-0.205029	0.933626	1
4930579G24Rik	124.462	96.6787	152.245	1.57475	0.655121	0.00937844	0.0445953
4930579J09Rik	8.54618	10.1773	6.91506	0.67946	-0.557539	0.605873	0.890493
4930579K19Rik	4.03407	2.54414	5.524	2.17127	1.11854	0.461475	0.770038
4930581F22Rik	30.9854	29.482	32.4887	1.10198	0.140104	0.858409	1
4930583H14Rik	5.97913	6.88453	5.07373	0.736976	-0.440311	0.737388	0.978802
4930583K01Rik	0.224439	0.448878	0	0	#NAME?	0.983977	1
4930584F24Rik	0	0	0	NA	NA	NA	NA
4930588N13Rik	9.23343	6.73465	11.7322	1.74207	0.8008	0.410524	0.719878
4930590J08Rik	13.1663	15.5638	10.7688	0.691911	-0.531341	0.440093	0.749507
4930592I03Rik	0	0	0	NA	NA	NA	NA
4930594C11Rik	0.219476	0	0.438952	Inf	Inf	1	1
4930595M18Rik	0	0	0	NA	NA	NA	NA
4930596D02Rik	0	0	0	NA	NA	NA	NA
4931406B18Rik	1.04333	0.598751	1.48791	2.48502	1.31326	0.825651	1
4931406C07Rik	485.774	408.564	562.985	1.37796	0.462536	0.0053479	0.0289043
4931406H21Rik	0	0	0	NA	NA	NA	NA
4931406P16Rik	759.161	588.441	929.88	1.58024	0.660146	6.36202e-06	0.000116841
4931407G18Rik	0	0	0	NA	NA	NA	NA
4931408A02Rik	8.35722	4.78853	11.9259	2.49052	1.31644	0.290746	0.577421
4931408C20Rik	0	0	0	NA	NA	NA	NA
4931409K22Rik	1.75445	1.49651	2.01239	1.34472	0.427308	1	1
4931414P19Rik	37.2444	35.7693	38.7196	1.08248	0.114342	0.757395	0.989764
4931417E11Rik	0	0	0	NA	NA	NA	NA
4931417G12Rik	2.78719	2.24513	3.32924	1.48287	0.568393	0.787468	1
4931423N10Rik	5.92007	6.58404	5.2561	0.798309	-0.32498	0.745516	0.982629
4931428F04Rik	3032.45	3256.97	2807.93	0.862128	-0.214026	0.169844	0.398541
4931428L18Rik	1.19283	0.897756	1.48791	1.65736	0.72889	1	1
4931429I11Rik	4.28866	5.68703	2.89029	0.508225	-0.97646	0.526205	0.831414
4931429L15Rik	2.14501	2.09526	2.19476	1.04749	0.0669333	1	1
4931440F15Rik	7.61859	5.23815	9.99904	1.90889	0.932733	0.424051	0.73468
4931440L10Rik	0.219476	0	0.438952	Inf	Inf	1	1
4931440P22Rik	9.88756	5.23815	14.537	2.77521	1.4726	0.0988778	0.270251
4932411E22Rik	4.28303	6.28578	2.28028	0.362769	-1.46288	0.35819	0.660319
4932411G14Rik	0.486678	0.448878	0.524479	1.16842	0.22456	1	1
4932411N23Rik	0.968393	0.448878	1.48791	3.31473	1.72889	0.832425	1
4932412H11Rik	3.72903	1.94539	5.51268	2.83372	1.5027	0.416405	0.727264
4932414J04Rik	0.224439	0.448878	0	0	#NAME?	0.983977	1
4932414N04Rik	4.63282	3.74164	5.524	1.47636	0.562043	0.669249	0.939632
4932415G12Rik	166.424	177.947	154.901	0.870489	-0.200103	0.492675	0.801225
4932415M13Rik	0	0	0	NA	NA	NA	NA
4932416H05Rik	34.1098	25.293	42.9267	1.69718	0.763139	0.0800752	0.230443
4932418E24Rik	5.46726	4.19052	6.74401	1.60935	0.686478	0.609349	0.892502
4932425I24Rik	4.40036	6.43491	2.36581	0.367653	-1.44358	0.30316	0.5943
4932429P05Rik	0	0	0	NA	NA	NA	NA
4932435O22Rik	1.57211	2.09526	1.04896	0.500634	-0.998173	0.787164	1
4932438A13Rik	4077.12	4845.24	3309	0.682939	-0.550172	1.48232e-06	3.49656e-05
4932438H23Rik	2.385	2.84314	1.92686	0.677722	-0.561234	0.814056	1
4932441B19Rik	0	0	0	NA	NA	NA	NA
4932441J04Rik	19.7947	22.1508	17.4386	0.787265	-0.345078	0.727843	0.973352
4932443I19Rik	3.23673	2.09526	4.3782	2.08957	1.06321	0.579581	0.873344
4933400A11Rik	0	0	0	NA	NA	NA	NA
4933400C05Rik	0.96773	1.49651	0.438952	0.293317	-1.76947	0.770801	0.992755
4933400F21Rik	0.224439	0.448878	0	0	#NAME?	0.983977	1
4933401B06Rik	0	0	0	NA	NA	NA	NA
4933402E13Rik	2.31044	2.69401	1.92686	0.715239	-0.483503	0.951896	1
4933402J07Rik	0.224439	0.448878	0	0	#NAME?	0.983977	1
4933402N03Rik	0	0	0	NA	NA	NA	NA
4933402N22Rik	0	0	0	NA	NA	NA	NA
4933402P03Rik	3.17602	4.33965	2.01239	0.463721	-1.10867	0.487579	0.796754
4933403F05Rik	336.995	317.122	356.868	1.12533	0.170354	0.356164	0.658056
4933403G14Rik	39.7295	49.2393	30.2198	0.613732	-0.704319	0.119611	0.310151
4933403O03Rik	0.524479	0	1.04896	Inf	Inf	0.762787	0.990378
4933403O08Rik	1.27273	1.49651	1.04896	0.700937	-0.512644	0.964295	1
4933404M02Rik	7.78229	7.33266	8.23192	1.12264	0.166891	1	1
4933404O12Rik	243.71	282.551	204.868	0.725067	-0.463815	0.0143903	0.0621642
4933405L10Rik	7.41435	5.98677	8.84192	1.47691	0.562582	0.594217	0.882402
4933405O20Rik	0.262239	0	0.524479	Inf	Inf	1	1
4933406F09Rik	1.26777	1.04763	1.48791	1.42026	0.506157	1	1
4933406I18Rik	4.08609	4.48952	3.68267	0.82028	-0.285811	0.932866	1
4933406J08Rik	0	0	0	NA	NA	NA	NA
4933406K04Rik	0	0	0	NA	NA	NA	NA
4933406M09Rik	0	0	0	NA	NA	NA	NA
4933407C03Rik	8345.73	9034.14	7657.33	0.847598	-0.238547	0.0837898	0.238804
4933407H18Rik	329.534	351.991	307.078	0.872402	-0.196935	0.227251	0.489701
4933407K13Rik	75.9977	85.154	66.8414	0.784947	-0.349332	0.255166	0.529026
4933407L21Rik	12.9963	14.5169	11.4756	0.7905	-0.339163	0.702449	0.961274
4933407P14Rik	0	0	0	NA	NA	NA	NA
4933408B17Rik	70.6061	72.1358	69.0764	0.957589	-0.0625221	0.863553	1
4933409G03Rik	0	0	0	NA	NA	NA	NA
4933409K07Rik	0	0	0	NA	NA	NA	NA
4933411G11Rik	0	0	0	NA	NA	NA	NA
4933411K16Rik	0.524479	0	1.04896	Inf	Inf	0.762787	0.990378
4933411K20Rik	379.047	459.437	298.657	0.650049	-0.621379	0.0003768	0.00339422
4933412E24Rik	0	0	0	NA	NA	NA	NA
4933413G19Rik	2.82995	2.24513	3.41477	1.52097	0.604988	0.78588	1
4933415F23Rik	0	0	0	NA	NA	NA	NA
4933416C03Rik	0.781091	0.598751	0.96343	1.60907	0.686223	1	1
4933417A18Rik	0	0	0	NA	NA	NA	NA
4933417G07Rik	0	0	0	NA	NA	NA	NA
4933421E11Rik	362.72	384.021	341.419	0.889064	-0.169641	0.307226	0.599139
4933421I07Rik	0.224439	0.448878	0	0	#NAME?	0.983977	1
4933421O10Rik	170.23	158.487	181.974	1.1482	0.19937	0.355536	0.657515
4933422H20Rik	0	0	0	NA	NA	NA	NA
4933424B01Rik	577.433	637.824	517.042	0.810635	-0.302875	0.0781807	0.226294
4933425L06Rik	0	0	0	NA	NA	NA	NA
4933425O20Rik	5.84617	5.38728	6.30506	1.17036	0.226953	0.988484	1
4933426M11Rik	1616.53	1133.06	2100	1.85339	0.890169	6.24759e-07	1.67328e-05
4933427D06Rik	8.93926	13.318	4.56057	0.342438	-1.54609	0.262328	0.537989
4933427D14Rik	956.773	1145.61	767.938	0.670332	-0.577053	1.48244e-05	0.000232009
4933427E11Rik	2.35816	3.14289	1.57344	0.500634	-0.998173	0.664834	0.937237
4933429O19Rik	0	0	0	NA	NA	NA	NA
4933430H15Rik	9.15191	9.27953	9.0243	0.972495	-0.0402379	1	1
4933430I17Rik	13.6759	14.8159	12.5359	0.846109	-0.241084	0.820298	1
4933431E20Rik	181.466	172.555	190.377	1.10328	0.141804	0.498673	0.80646
4933432B09Rik	146.651	164.021	129.282	0.788205	-0.343357	0.115129	0.302055
4933432I09Rik	0.524479	0	1.04896	Inf	Inf	0.762787	0.990378
4933433C11Rik	1.78099	2.24513	1.31685	0.586538	-0.769704	0.957602	1
4933433P14Rik	132.739	131.099	134.378	1.02501	0.0356431	0.912815	1
4933434E20Rik	991.94	1001.8	982.081	0.980317	-0.0286796	0.834827	1
4933434I20Rik	0	0	0	NA	NA	NA	NA
4933436C20Rik	66.4849	64.6518	68.318	1.05671	0.0795755	0.85498	1
4933436I01Rik	0	0	0	NA	NA	NA	NA
4933437F05Rik	30.1658	39.2104	21.1213	0.538664	-0.892542	0.0773384	0.224506
4933439C10Rik	305.655	286.891	324.419	1.13081	0.177357	0.371647	0.675033
4933439F11Rik	1.36954	0.897756	1.84133	2.05104	1.03635	0.873437	1
4933439F18Rik	561.732	481.296	642.168	1.33425	0.416026	0.00584264	0.0307962
5031410I06Rik	6.23574	7.48328	4.9882	0.66658	-0.58515	0.652808	0.92828
5031414D18Rik	1.89336	1.94539	1.84133	0.946513	-0.0793055	1	1
5031425F14Rik	0.486678	0.448878	0.524479	1.16842	0.22456	1	1
5031426D15Rik	8.25408	6.43491	10.0733	1.56541	0.646538	0.574674	0.870329
5031434O11Rik	40.7632	39.0613	42.4651	1.08714	0.120539	0.815989	1
5031439G07Rik	2540.05	2712.08	2368.03	0.87314	-0.195715	0.114286	0.300721
5033404E19Rik	0.486678	0.448878	0.524479	1.16842	0.22456	1	1
5033406O09Rik	1.67455	0.897756	2.45134	2.73052	1.44917	0.725522	0.971452
5033411D12Rik	10.4236	11.8229	9.0243	0.763288	-0.389701	0.693771	0.954478
5033414D02Rik	155.912	96.8315	214.993	2.22028	1.15074	0.000637053	0.00518106
5133401N09Rik	246.695	228.078	265.313	1.16326	0.218171	0.232962	0.497667
5330413P13Rik	20.9417	18.4077	23.4757	1.27532	0.350861	0.582004	0.873564
5330417C22Rik	162.31	167.61	157.01	0.936761	-0.0942468	0.689952	0.952136
5330426P16Rik	68.5322	62.259	74.8054	1.20152	0.26486	0.386155	0.691131
5330434G04Rik	100.773	112.095	89.4506	0.79799	-0.325557	0.27556	0.556251
5330437I02Rik	15.9807	17.0596	14.9017	0.87351	-0.195104	0.784047	1
5330439B14Rik	0	0	0	NA	NA	NA	NA
5430402E10Rik	0	0	0	NA	NA	NA	NA
5430402O13Rik	4.17658	4.9384	3.41477	0.691473	-0.532256	0.722881	0.969891
5430405G05Rik	130.385	129.453	131.317	1.0144	0.0206286	0.960145	1
5430405H02Rik	27.7301	24.0947	31.3656	1.30176	0.380463	0.459347	0.767941
5430407P10Rik	18.3263	23.9456	12.707	0.530659	-0.914142	0.167865	0.395036
5430411K18Rik	785.746	1010.32	561.177	0.555447	-0.848279	3.26195e-06	6.74036e-05
5430413K10Rik	0	0	0	NA	NA	NA	NA
5430416N02Rik	241.918	252.92	230.915	0.912996	-0.13132	0.504143	0.811084
5430416O09Rik	0.219476	0	0.438952	Inf	Inf	1	1
5430417L22Rik	161.986	152.054	171.918	1.13064	0.177139	0.435643	0.744913
5430419D17Rik	0	0	0	NA	NA	NA	NA
5430427O19Rik	0.711117	0.897756	0.524479	0.58421	-0.77544	0.972299	1
5430435G22Rik	8.78389	6.88453	10.6833	1.55178	0.633922	0.511442	0.818143
5430437P03Rik	858.807	809.193	908.421	1.12263	0.166878	0.22177	0.482277
5530400C23Rik	0	0	0	NA	NA	NA	NA
5530601H04Rik	107.02	116.283	97.7567	0.840678	-0.250375	0.343709	0.643311
5730403B10Rik	2692.85	2852.89	2532.81	0.887807	-0.171682	0.142711	0.353109
5730408K05Rik	34.3962	27.9862	40.8062	1.45808	0.544069	0.245456	0.515728
5730409E04Rik	108.882	131.995	85.7679	0.64978	-0.621978	0.0172243	0.0711506
5730416F02Rik	0.481715	0	0.96343	Inf	Inf	0.773607	0.992755
5730419I09Rik	936.893	1003.3	870.489	0.86763	-0.204849	0.124309	0.318797
5730422E09Rik	5.14431	6.43491	3.85372	0.598877	-0.739668	0.558993	0.858794
5730437N04Rik	933.339	852.445	1014.23	1.18979	0.250712	0.0685552	0.204891
5730455O13Rik	191.174	197.849	184.499	0.932526	-0.100785	0.704261	0.962024
5730455P16Rik	1592.01	1787.79	1396.23	0.780979	-0.356643	0.00422697	0.0238038
5730469M10Rik	645.26	632.293	658.226	1.04101	0.05799	0.721492	0.969036
5730494M16Rik	1721.75	1653.27	1790.23	1.08284	0.114819	0.298889	0.588298
5730494N06Rik	351.132	289.283	412.981	1.4276	0.513593	0.00448213	0.0249828
5730507C01Rik	214.578	217.606	211.55	0.97217	-0.0407202	0.928508	1
5730508B09Rik	43.1246	36.6641	49.5852	1.35242	0.435543	0.347796	0.648255
5730522E02Rik	36.4933	43.9982	28.9884	0.658855	-0.601968	0.149014	0.36375
5730528L13Rik	253.685	242.894	264.475	1.08885	0.122805	0.50851	0.815556
5730559C18Rik	34.7374	22.4491	47.0257	2.09477	1.06679	0.0191913	0.0769619
5730577I03Rik	148.505	151.754	145.255	0.957175	-0.0631452	0.863993	1
5730590G19Rik	80.8408	62.5565	99.1251	1.58457	0.66409	0.058218	0.181
5730601F06Rik	1904.97	2123.63	1686.3	0.794062	-0.332676	0.00681829	0.0347243
5830403L16Rik	4.04896	3.89077	4.20714	1.08131	0.112785	1	1
5830405N20Rik	0.438952	0	0.877903	Inf	Inf	0.785423	1
5830411N06Rik	0	0	0	NA	NA	NA	NA
5830415F09Rik	92.3485	139.479	45.2183	0.324195	-1.62507	3.85857e-08	1.57833e-06
5830416P10Rik	6.50927	6.88453	6.13401	0.890984	-0.166528	1	1
5830417I10Rik	284.086	307.841	260.331	0.845669	-0.241836	0.16216	0.385848
5830418K08Rik	525.054	650.559	399.549	0.614163	-0.703307	5.76969e-06	0.000107609
5830432E09Rik	0	0	0	NA	NA	NA	NA
5830433M19Rik	76.5094	64.6511	88.3677	1.36684	0.450845	0.174695	0.407012
5930412G12Rik	79.1972	73.4817	84.9126	1.15556	0.208594	0.463437	0.772144
5930416I19Rik	261.355	240.944	281.766	1.16942	0.225795	0.248389	0.519525
5930434B04Rik	455.905	387.169	524.642	1.35507	0.43837	0.00749634	0.0374152
6030405A18Rik	86.9867	85.9026	88.0708	1.02524	0.0359617	0.880375	1
6030408B16Rik	3.20323	4.04064	2.36581	0.585504	-0.77225	0.703334	0.961974
6030419C18Rik	709.717	703.549	715.884	1.01753	0.0250742	0.740551	0.978952
6030422M02Rik	62.4253	60.4605	64.3901	1.06499	0.0908446	0.839071	1
6030429G01Rik	40.605	34.2698	46.9402	1.36972	0.453885	0.362323	0.664738
6030446N20Rik	50.9421	48.1887	53.6955	1.11428	0.156106	0.74134	0.979564
6030458C11Rik	612.966	689.176	536.755	0.778836	-0.360609	0.0188772	0.076041
6030468B19Rik	0	0	0	NA	NA	NA	NA
6030498E09Rik	1.44944	1.49651	1.40238	0.937103	-0.0937206	1	1
6230400D17Rik	55.4872	56.572	54.4024	0.961648	-0.0564188	0.974935	1
6230409E13Rik	3030.31	3413.67	2646.95	0.775398	-0.36699	0.00217563	0.0139747
6230427J02Rik	19.0457	12.4209	25.6705	2.06671	1.04734	0.10348	0.279644
6330403A02Rik	1118.86	1248.41	989.308	0.792455	-0.335599	0.175442	0.408222
6330403K07Rik	611.041	466.783	755.3	1.6181	0.694299	3.52528e-06	7.13701e-05
6330406I15Rik	11.6715	11.075	12.268	1.10772	0.147589	0.847458	1
6330407A03Rik	0	0	0	NA	NA	NA	NA
6330407J23Rik	2555.42	3034.01	2076.83	0.684518	-0.54684	7.06117e-06	0.000127231
6330408A02Rik	131.923	146.211	117.635	0.804558	-0.313732	0.159493	0.381622
6330409N04Rik	709.022	733.178	684.867	0.934107	-0.0983405	0.55345	0.853849
6330416G13Rik	52.5822	53.7266	51.4379	0.9574	-0.0628067	0.920999	1
6330439K17Rik	3490.73	4287.62	2693.84	0.628284	-0.670512	0.000319843	0.00297342
6330503K22Rik	765.101	839.714	690.488	0.822289	-0.282282	0.0371943	0.127923
6330512M04Rik	6.17838	5.08827	7.26849	1.42848	0.514479	0.725456	0.971452
6330527O06Rik	980.456	1144.41	816.502	0.713469	-0.487077	0.00130856	0.00927956
6330545A04Rik	8.18944	7.18353	9.19535	1.28006	0.356211	0.780581	0.998358
6330549D23Rik	8.30916	4.78927	11.8291	2.46991	1.30446	0.165378	0.39123
6330577E15Rik	1414.04	1291.98	1536.1	1.18895	0.249684	0.0602292	0.185718
6330578E17Rik	1553.16	1539.37	1566.94	1.01792	0.0256186	0.840834	1
6430411K18Rik	0	0	0	NA	NA	NA	NA
6430527G18Rik	2088.96	2537.75	1640.16	0.646306	-0.629712	5.52144e-07	1.51949e-05
6430531B16Rik	1.89402	0.897756	2.89029	3.21946	1.68682	0.602657	0.888048
6430548M08Rik	1815.33	2139.64	1491.01	0.696851	-0.521079	3.21566e-05	0.000438451
6430550D23Rik	15.7639	13.9182	17.6096	1.26523	0.339394	0.633985	0.914006
6430562O15Rik	0.968393	0.448878	1.48791	3.31473	1.72889	0.832425	1
6430571L13Rik	190.586	211.318	169.854	0.803783	-0.315121	0.155679	0.37504
6430573F11Rik	38.711	42.8015	34.6206	0.808865	-0.306029	0.517767	0.82467
6430598A04Rik	1998.18	2167.95	1828.41	0.843381	-0.245743	0.062981	0.191702
6430704M03Rik	304.608	315.171	294.045	0.932969	-0.100099	0.574902	0.870528
6530401D17Rik	757.403	704.135	810.671	1.1513	0.203264	0.153016	0.370457
6530401N04Rik	127.84	129.607	126.072	0.972727	-0.0398935	1	1
6530402F18Rik	78.8138	83.8081	73.8194	0.880814	-0.183091	0.519877	0.826406
6530411M01Rik	18.625	16.7613	20.4886	1.22237	0.289686	0.726935	0.972617
6530418L21Rik	107	69.588	144.411	2.07523	1.05327	0.00186479	0.0123281
6720401G13Rik	2388.1	2527.69	2248.52	0.889554	-0.168846	0.143781	0.355171
6720456B07Rik	2015.01	1908.74	2121.29	1.11136	0.152322	0.197642	0.444756
6720456H20Rik	236.298	236.459	236.137	0.998641	-0.00196203	0.979039	1
6720463M24Rik	121.304	110.446	132.161	1.19661	0.258952	0.349493	0.650214
6720489N17Rik	38.9266	33.5241	44.3291	1.3223	0.403054	0.315111	0.608516
6820408C15Rik	16.4366	16.3125	16.5607	1.01522	0.0217885	1	1
6820431F20Rik	3441.89	3808.62	3075.17	0.807423	-0.308604	0.00944503	0.0448527
7420426K07Rik	0	0	0	NA	NA	NA	NA
7420461P10Rik	3.311	3.29276	3.32924	1.01108	0.0158957	1	1
7530420F21Rik	0.743954	0	1.48791	Inf	Inf	0.570698	0.866862
8030411F24Rik	0	0	0	NA	NA	NA	NA
8030462N17Rik	332.483	369.951	295.015	0.797442	-0.326549	0.0574564	0.179096
8430406I07Rik	74.1761	73.182	75.1702	1.02717	0.0386724	0.918722	1
8430408G22Rik	0.523815	1.04763	0	0	#NAME?	0.721413	0.969036
8430410A17Rik	243.247	277.91	208.585	0.75055	-0.41398	0.0292894	0.106881
8430410K20Rik	605.647	621.373	589.921	0.949383	-0.0749385	0.56836	0.8666
8430419L09Rik	1701.52	1813.97	1589.07	0.876018	-0.190967	0.160162	0.382712
8430427H17Rik	1355.7	1378.34	1333.06	0.967149	-0.0481904	0.75633	0.989435
8430429K09Rik	18.3625	18.4085	18.3165	0.995004	-0.00722531	0.980924	1
8430431K14Rik	1.00057	0.598751	1.40238	2.34218	1.22785	0.82945	1
9030025P20Rik	242.898	210.262	275.535	1.31044	0.390046	0.0597826	0.184779
9030224M15Rik	5.9278	4.49026	7.36533	1.64029	0.713951	0.47283	0.78231
9030409G11Rik	1798.99	1989.84	1608.13	0.808173	-0.307264	0.0135006	0.0591761
9030418K01Rik	257.122	303.505	210.74	0.694354	-0.526257	0.00769127	0.0381925
9030425E11Rik	1045.32	1115.4	975.234	0.874338	-0.193738	0.175386	0.408146
9030612E09Rik	11.9967	11.8222	12.1712	1.02952	0.0419704	1	1
9030617O03Rik	56.0756	31.1262	81.025	2.60311	1.38024	0.000371689	0.00336164
9030619P08Rik	0	0	0	NA	NA	NA	NA
9030624J02Rik	1795.23	1869.97	1720.48	0.920061	-0.120199	0.352906	0.654464
9030625A04Rik	36.9674	27.2398	46.6949	1.71421	0.777547	0.0584041	0.181422
9130008F23Rik	2.27826	2.54414	2.01239	0.79099	-0.338269	0.951782	1
9130011E15Rik	456.11	510.636	401.584	0.78644	-0.346591	0.0386363	0.131576
9130011J15Rik	1759.01	1521.26	1996.75	1.31256	0.392385	0.00166863	0.0112733
9130017N09Rik	20.7507	23.1962	18.3052	0.789144	-0.34164	0.538313	0.841546
9130019O22Rik	8.82802	5.38802	12.268	2.27691	1.18707	0.181106	0.417463
9130019P16Rik	4.57877	4.34039	4.81715	1.10984	0.150355	0.962099	1
9130023H24Rik	28.7542	28.4344	29.074	1.02249	0.0320908	1	1
9130024F11Rik	7.82245	3.74164	11.9033	3.1813	1.66962	0.118617	0.308552
9130204L05Rik	0	0	0	NA	NA	NA	NA
9130206I24Rik	35.2293	30.5304	39.9283	1.30782	0.387165	0.419473	0.729861
9130209A04Rik	0.224439	0.448878	0	0	#NAME?	0.983977	1
9130230L23Rik	0	0	0	NA	NA	NA	NA
9130401M01Rik	356.078	354.537	357.62	1.0087	0.012493	0.937623	1
9130404H23Rik	0.224439	0.448878	0	0	#NAME?	0.983977	1
9130409I23Rik	0.748254	1.49651	0	0	#NAME?	0.525812	0.831322
9230102K24Rik	0	0	0	NA	NA	NA	NA
9230104L09Rik	0	0	0	NA	NA	NA	NA
9230105E10Rik	45.2992	26.9379	63.6606	2.36324	1.24076	0.00284531	0.0173182
9230107M04Rik	0	0	0	NA	NA	NA	NA
9230110C19Rik	176.521	155.944	197.098	1.2639	0.337887	0.115425	0.302501
9230110F15Rik	0	0	0	NA	NA	NA	NA
9230113P08Rik	0	0	0	NA	NA	NA	NA
9230114K14Rik	39.5343	36.6663	42.4022	1.15644	0.209686	0.61813	0.900965
9230115E21Rik	9.09915	7.33266	10.8656	1.48181	0.567362	0.607455	0.891597
9230116N13Rik	11.939	10.4756	13.4025	1.27941	0.355475	0.7324	0.976208
9330020H09Rik	27.1191	16.7613	37.4769	2.23592	1.16087	0.0306472	0.110561
9330111N05Rik	0.706154	0.448878	0.96343	2.14631	1.10186	1	1
9330129D05Rik	21.209	19.4553	22.9626	1.18027	0.239119	0.678117	0.94442
9330133O14Rik	77.1446	75.8752	78.4139	1.03346	0.0474803	0.908215	1
9330151L19Rik	209.043	208.172	209.913	1.00837	0.0120186	0.962385	1
9330158H04Rik	14.6539	16.6122	12.6956	0.764236	-0.387909	0.597722	0.884125
9330159F19Rik	2896.6	3490.92	2302.27	0.659503	-0.600549	6.61016e-07	1.74955e-05
9330175E14Rik	0.299376	0.598751	0	0	#NAME?	0.983978	1
9330176C04Rik	8.18841	8.23042	8.14639	0.98979	-0.014805	0.981625	1
9330182L06Rik	1332.79	1457.65	1207.94	0.828687	-0.271101	0.156398	0.376177
9430007A20Rik	0	0	0	NA	NA	NA	NA
9430008C03Rik	637.809	929.206	346.412	0.372805	-1.42351	2.6403e-18	1.72748e-15
9430015G10Rik	630.429	603.265	657.594	1.09006	0.124406	0.398089	0.706031
9430016H08Rik	286.298	277.012	295.584	1.06705	0.0936218	0.648283	0.924595
9430020K01Rik	327.09	250.377	403.803	1.61278	0.689551	0.0108277	0.0500839
9430021M05Rik	177.197	174.797	179.597	1.02746	0.0390817	0.907059	1
9430023L20Rik	471.471	501.794	441.148	0.87914	-0.185834	0.213142	0.469539
9430031J16Rik	220.828	263.096	178.559	0.678684	-0.559188	0.00596563	0.0312219
9430038I01Rik	44.9448	37.4142	52.4755	1.40256	0.488059	0.224482	0.486145
9430041J12Rik	15.3946	13.6184	17.1707	1.26084	0.334386	0.682676	0.947033
9430060I03Rik	9.25589	12.1212	6.39059	0.527224	-0.923512	0.258666	0.532968
9430070O13Rik	3.46117	2.54414	4.3782	1.7209	0.783161	0.709083	0.96485
9430076C15Rik	2.88264	3.14289	2.62239	0.834389	-0.261207	0.946947	1
9430083A17Rik	34.0587	29.0331	39.0843	1.3462	0.428889	0.344621	0.644614
9530002B09Rik	0	0	0	NA	NA	NA	NA
9530003J23Rik	0.262239	0	0.524479	Inf	Inf	1	1
9530008L14Rik	5.83558	5.53715	6.13401	1.10779	0.147685	0.988572	1
9530009M10Rik	92.4188	93.9847	90.853	0.966678	-0.0488921	0.905686	1
9530026P05Rik	1.82872	2.69401	0.96343	0.357619	-1.4835	0.637776	0.916171
9530036O11Rik	9.21416	11.0743	7.35402	0.664061	-0.590612	0.493618	0.801963
9530053A07Rik	4.56417	1.94539	7.18296	3.69231	1.88452	0.208696	0.46258
9530059O14Rik	1.75378	2.54414	0.96343	0.378686	-1.40092	0.642354	0.919878
9530068E07Rik	4656.19	3850.51	5461.88	1.41848	0.504346	1.75262e-05	0.000265742
9530077C05Rik	173.499	222.391	124.607	0.560307	-0.835711	0.000219612	0.00217339
9530082P21Rik	847.984	943.144	752.825	0.798208	-0.325164	0.0239166	0.0910816
9530091C08Rik	22.292	23.0464	21.5376	0.934532	-0.0976838	0.80257	1
9630013A20Rik	0.481715	0	0.96343	Inf	Inf	0.773607	0.992755
9630028H03Rik	0.935557	1.34663	0.524479	0.389474	-1.3604	0.773567	0.992755
9630033F20Rik	215.806	228.83	202.782	0.886169	-0.174346	0.440029	0.74947
9830001H06Rik	3178.57	3898.68	2458.45	0.630585	-0.665236	1.69252e-08	7.73147e-07
9830107B12Rik	0.968393	0.448878	1.48791	3.31473	1.72889	0.832425	1
9930012K11Rik	20.7445	17.6598	23.8292	1.34934	0.432258	0.456777	0.766045
9930013L23Rik	505.156	481.595	528.717	1.09785	0.134675	0.381577	0.685832
9930014A18Rik	28.8391	30.5311	27.1471	0.889161	-0.169483	0.790808	1
9930021D14Rik	0	0	0	NA	NA	NA	NA
9930021J03Rik	956.943	1050.59	863.295	0.821722	-0.283277	0.0363887	0.125895
9930023K05Rik	3.01725	2.09526	3.93925	1.88008	0.910791	0.677013	0.944037
9930032O22Rik	1.00553	1.04763	0.96343	0.919629	-0.120877	1	1
9930104L06Rik	341.942	379.982	303.902	0.79978	-0.322324	0.0727135	0.214124
9930111J21Rik1	3.57221	4.33965	2.80476	0.646311	-0.6297	0.716406	0.968921
9930111J21Rik2	0	0	0	NA	NA	NA	NA
A030009H04Rik	1728.77	1785.25	1672.29	0.936727	-0.0942994	0.462706	0.771162
A130010J15Rik	71.8976	76.1728	67.6225	0.887751	-0.171772	0.518482	0.825298
A130022J15Rik	90.8373	88.2962	93.3785	1.05756	0.0807397	0.849274	1
A130040M12Rik	1347.15	955.868	1738.43	1.81869	0.862902	0.00855184	0.0413753
A130049A11Rik	18.0322	15.5646	20.4999	1.31709	0.397353	0.531905	0.836486
A1bg	0.706154	0.448878	0.96343	2.14631	1.10186	1	1
A1cf	0.299376	0.598751	0	0	#NAME?	0.983978	1
A230020J21Rik	4.72265	5.23815	4.20714	0.803174	-0.316215	0.929483	1
A230046K03Rik	540.197	540.412	539.982	0.999205	-0.00114747	0.96506	1
A230050P20Rik	220.171	229.871	210.472	0.915609	-0.127197	0.550299	0.851615
A230051G13Rik	160.209	199.346	121.073	0.607351	-0.719398	0.0020429	0.0132833
A230056P14Rik	220.81	234.511	207.109	0.883151	-0.179268	0.374748	0.678611
A230057D06Rik	151.798	145.462	158.133	1.08711	0.120495	0.687084	0.950146
A230065H16Rik	2.40228	1.64638	3.15819	1.91826	0.939799	0.647075	0.923337
A230072C01Rik	199.87	194.101	205.638	1.05944	0.0833024	0.845815	1
A230072E10Rik	54.6924	59.1154	50.2694	0.850361	-0.233853	0.532597	0.83725
A230073K19Rik	90.8316	87.2471	94.4161	1.08217	0.113927	0.829201	1
A2ld1	121.831	115.685	127.976	1.10625	0.145675	0.579784	0.873344
A2m	815.026	644.604	985.447	1.52876	0.612364	0.515555	0.822173
A330021E22Rik	81.9211	94.2815	69.5607	0.737798	-0.438703	0.126954	0.324147
A330023F24Rik	59.1931	74.6785	43.7078	0.58528	-0.772802	0.0250328	0.0944531
A330035P11Rik	25.9849	23.9449	28.025	1.1704	0.226998	0.730547	0.974948
A330040F15Rik	45.9189	46.095	45.7428	0.99236	-0.0110641	0.987864	1
A330049M08Rik	8.91375	11.5224	6.30506	0.547198	-0.869865	0.334699	0.632869
A330050B17Rik	10.347	13.7676	6.92638	0.503094	-0.991101	0.240847	0.509432
A330050F15Rik	113.729	105.507	121.951	1.15585	0.208957	0.44312	0.752882
A330069E16Rik	89.9134	73.4847	106.342	1.44713	0.533197	0.0483785	0.156971
A330076H08Rik	78.3762	74.8269	81.9255	1.09487	0.130756	0.707677	0.963781
A3galt2	64.9951	68.6954	61.2948	0.892269	-0.164449	0.745039	0.982187
A430005L14Rik	123.632	109.546	137.719	1.25718	0.330196	0.231397	0.495323
A430033K04Rik	259.502	387.601	131.403	0.339015	-1.56058	1.75491e-08	7.97597e-07
A430078G23Rik	91.1843	92.4904	89.8782	0.971757	-0.0413321	0.979918	1
A430084P05Rik	0	0	0	NA	NA	NA	NA
A430089I19Rik	0	0	0	NA	NA	NA	NA
A430093F15Rik	0.561615	0.598751	0.524479	0.875954	-0.191073	1	1
A430105I19Rik	26.0738	27.087	25.0605	0.925185	-0.112186	0.835305	1
A430107O13Rik	14.6314	9.5778	19.6849	2.05527	1.03933	0.476532	0.786082
A430110N23Rik	310.3	196.052	424.548	2.16549	1.11469	0.000547976	0.00458506
A4galt	5.83191	2.39426	9.26956	3.87157	1.95292	0.467606	0.776668
A4gnt	0	0	0	NA	NA	NA	NA
A530013C23Rik	0	0	0	NA	NA	NA	NA
A530016L24Rik	1.74948	1.04763	2.45134	2.33989	1.22644	0.719949	0.969036
A530023O14Rik	0.743954	0	1.48791	Inf	Inf	0.570698	0.866862
A530032D15Rik	0.219476	0	0.438952	Inf	Inf	1	1
A530053G22Rik	0	0	0	NA	NA	NA	NA
A530054K11Rik	138.248	159.533	116.962	0.733156	-0.447808	0.0616	0.188936
A530058N18Rik	88.2158	93.383	83.0487	0.889334	-0.169202	0.502846	0.809863
A530064D06Rik	2.07074	0.897756	3.24371	3.61313	1.85325	0.50177	0.809071
A530088E08Rik	0.82319	1.64638	0	0	#NAME?	0.509439	0.816099
A530098C11Rik	2.2776	3.59177	0.96343	0.268233	-1.89844	0.41389	0.724083
A530099J19Rik	0	0	0	NA	NA	NA	NA
A630001G21Rik	6.01792	4.9384	7.09744	1.43719	0.523254	0.728969	0.973581
A630007B06Rik	373.258	500.153	246.364	0.492578	-1.02158	2.8638e-09	1.75315e-07
A630010A05Rik	0	0	0	NA	NA	NA	NA
A630033H20Rik	1.34767	1.64638	1.04896	0.637129	-0.650342	0.964572	1
A630055G03Rik	91.4779	82.759	100.197	1.2107	0.275847	0.392707	0.698896
A630066F11Rik	16.4412	16.7606	16.1217	0.961883	-0.0560662	0.920871	1
A630072M18Rik	139.12	144.871	133.37	0.920609	-0.119339	0.690174	0.952247
A630073D07Rik	0	0	0	NA	NA	NA	NA
A630075F10Rik	59.7216	68.9914	50.4518	0.731276	-0.451512	0.183846	0.421833
A630089N07Rik	327.511	328.203	326.819	0.995785	-0.00609413	0.984959	1
A630095E13Rik	0.481715	0	0.96343	Inf	Inf	0.773607	0.992755
A730008H23Rik	0	0	0	NA	NA	NA	NA
A730011L01Rik	624.667	705.481	543.852	0.770896	-0.375392	0.0112783	0.0516245
A730017C20Rik	343.735	286.735	400.734	1.39758	0.482926	0.121115	0.312743
A730017L22Rik	219.794	210.867	228.72	1.08466	0.117249	0.562753	0.861426
A730018C14Rik	0	0	0	NA	NA	NA	NA
A730020M07Rik	1.00553	1.04763	0.96343	0.919629	-0.120877	1	1
A730037C10Rik	5.44969	6.43565	4.46373	0.693594	-0.527837	0.732606	0.97641
A730069N07Rik	6.46812	3.7409	9.19535	2.45806	1.29752	0.318915	0.613624
A830007P12Rik	60.1016	52.6775	67.5256	1.28187	0.358248	0.376572	0.680466
A830010M20Rik	377.327	433.849	320.805	0.739438	-0.435499	0.00790652	0.0389974
A830018L16Rik	370.099	445.971	294.227	0.659745	-0.600019	0.000392944	0.00351851
A830080D01Rik	230.748	264.444	197.053	0.745159	-0.42438	0.0272471	0.101134
A830082N09Rik	164.251	166.419	162.084	0.973952	-0.0380773	0.912071	1
A830093I24Rik	35.9268	35.7678	36.0859	1.00889	0.0127728	1	1
A930001N09Rik	894.396	840.453	948.338	1.12837	0.174234	0.348001	0.64844
A930003A15Rik	3.8179	5.53789	2.09791	0.378829	-1.40038	0.41513	0.725751
A930003O13Rik	11.4182	13.4701	9.3664	0.69535	-0.524188	0.570504	0.866862
A930004D18Rik	27.4503	26.3399	28.5608	1.08432	0.116788	0.829022	1
A930005H10Rik	103.035	97.8762	108.195	1.10542	0.1446	0.583149	0.874513
A930005I04Rik	63.6615	67.9438	59.3792	0.873946	-0.194384	0.537154	0.840818
A930007I19Rik	4.86222	4.6394	5.08505	1.09606	0.132324	0.973271	1
A930011G23Rik	23.6619	32.1768	15.147	0.470743	-1.08699	0.0464594	0.152198
A930012L18Rik	8.62773	8.23116	9.0243	1.09636	0.132718	0.943538	1
A930013F10Rik	213.721	238.103	189.339	0.795199	-0.330611	0.109161	0.291108
A930015D03Rik	116.547	133.045	100.048	0.751987	-0.41122	0.117954	0.307539
A930017M01Rik	14.2835	17.3593	11.2077	0.645631	-0.631217	0.329766	0.626922
A930018P22Rik	0.219476	0	0.438952	Inf	Inf	1	1
A930038C07Rik	517.973	567.783	468.163	0.824545	-0.27833	0.245144	0.515313
AA387883	2.22557	1.64638	2.80476	1.70359	0.768581	0.760244	0.990378
AA388235	169.781	167.621	171.941	1.02577	0.0367117	0.800161	1
AA408296	363.292	461.39	265.194	0.574771	-0.798942	3.31205e-06	6.80483e-05
AA415398	189.173	217.002	161.343	0.743508	-0.42758	0.0416375	0.139163
AA465934	154.29	136.188	172.391	1.26583	0.340084	0.142549	0.352934
AA467197	2.77689	1.34663	4.20714	3.12419	1.64348	0.463484	0.772144
AA474331	11.3933	10.1765	12.6101	1.23914	0.309334	0.778676	0.996559
AA543186	4.02911	2.09526	5.96295	2.84593	1.5089	0.302196	0.592928
AA545190	0.262239	0	0.524479	Inf	Inf	1	1
AA619741	0.224439	0.448878	0	0	#NAME?	0.983977	1
AA792892	1.15007	0.897756	1.40238	1.5621	0.643483	1	1
AA881470	208.162	214.461	201.864	0.941263	-0.0873307	0.750834	0.986243
AA960436	165.006	128.256	201.756	1.57307	0.653583	0.00359377	0.0209458
AA986860	58.5194	64.5004	52.5384	0.814543	-0.295937	0.328462	0.625639
AB056442	0	0	0	NA	NA	NA	NA
AB099516	1.44448	1.04763	1.84133	1.75762	0.813622	0.869415	1
AB124611	0.481715	0	0.96343	Inf	Inf	0.773607	0.992755
AF067063	0	0	0	NA	NA	NA	NA
AF251705	0.486678	0.448878	0.524479	1.16842	0.22456	1	1
AF357355	8.43204	11.5224	5.34163	0.463585	-1.10909	0.25514	0.529026
AF357359	512.089	534.278	489.9	0.916938	-0.125103	0.462338	0.770777
AF366264	2.01239	0	4.02477	Inf	Inf	0.118119	0.307834
AF529169	197.254	256.658	137.85	0.537095	-0.896751	7.00339e-05	0.000844253
AI118078	272.287	315.928	228.646	0.723729	-0.466479	0.0144685	0.0623814
AI182371	8.392	8.38104	8.40297	1.00262	0.00377138	1	1
AI314180	2768.38	3143.08	2393.68	0.761571	-0.39295	0.000998288	0.0074306
AI314831	7.16302	5.38728	8.93877	1.65924	0.730519	0.54281	0.845698
AI314976	159.335	136.936	181.735	1.32715	0.408333	0.0834505	0.238101
AI316807	272.805	270.879	274.731	1.01422	0.0203712	0.912785	1
AI317395	7.18887	6.58478	7.79297	1.18348	0.243037	0.919863	1
AI413582	327.196	288.243	366.149	1.27028	0.345145	0.0454914	0.149763
AI414108	1738.95	2028.29	1449.6	0.714695	-0.484601	0.000105591	0.0011915
AI427809	0.823854	0.598751	1.04896	1.75191	0.808927	1	1
AI428936	62.315	66.2997	58.3303	0.879798	-0.184756	0.632025	0.912569
AI429214	17.3287	18.7067	15.9507	0.852671	-0.229939	0.761086	0.990378
AI450353	23.7881	18.4055	29.1708	1.5849	0.664389	0.462156	0.770708
AI462493	149.915	123.318	176.513	1.43137	0.517394	0.0266889	0.0993889
AI464131	362.769	274.47	451.068	1.64341	0.716695	4.26439e-05	0.000554155
AI467606	0.481715	0	0.96343	Inf	Inf	0.773607	0.992755
AI480653	794.879	835.827	753.931	0.902018	-0.148772	0.291439	0.578395
AI504432	294.281	298.263	290.299	0.9733	-0.0390428	0.862662	1
AI506816	3.55864	0.897756	6.21953	6.92786	2.79241	0.139001	0.346885
AI507597	1.34767	1.64638	1.04896	0.637129	-0.650342	0.964572	1
AI593442	2555.5	3396.28	1714.71	0.504879	-0.985991	1.98598e-07	6.53448e-06
AI597468	841.173	733.015	949.332	1.29511	0.37307	0.0170729	0.0706222
AI597479	944.687	1086.06	803.317	0.739663	-0.43506	0.00133615	0.00943432
AI646023	942.927	1040.72	845.137	0.812072	-0.30032	0.0338313	0.119041
AI661453	4.27902	3.7409	4.81715	1.2877	0.364795	0.965552	1
AI662270	2.15064	1.49651	2.80476	1.87421	0.906279	0.764155	0.990733
AI747448	0.524479	0	1.04896	Inf	Inf	0.762787	0.990378
AI836003	893.325	979.355	807.295	0.824313	-0.278736	0.0507816	0.163121
AI837181	601.062	673.612	528.512	0.784594	-0.349981	0.0230089	0.0885048
AI846148	539.175	501.057	577.293	1.15215	0.20433	0.160399	0.382923
AI848100	1813.26	1819.97	1806.54	0.992624	-0.0106803	0.881462	1
AI854703	144.068	184.075	104.062	0.565323	-0.822853	0.000376463	0.00339288
AI987944	82.0864	81.563	82.6097	1.01283	0.0183968	0.971872	1
AK010878	375.434	339.278	411.59	1.21313	0.278737	0.0872026	0.246346
AK129341	70.02	60.1608	79.8792	1.32776	0.408996	0.247517	0.518423
AU015228	0	0	0	NA	NA	NA	NA
AU015836	0.711117	0.897756	0.524479	0.58421	-0.77544	0.972299	1
AU018091	2.31044	2.69401	1.92686	0.715239	-0.483503	0.951896	1
AU019823	403.507	377.883	429.131	1.13562	0.183478	0.391254	0.697137
AU019990	0	0	0	NA	NA	NA	NA
AU021034	4.40302	2.24439	6.56164	2.92357	1.54773	0.50112	0.808531
AU021092	4.76876	0.598751	8.93877	14.929	3.90005	0.0150354	0.0642161
AU022252	144.814	155.945	133.683	0.857245	-0.22222	0.388232	0.693538
AU022751	1.04829	1.04763	1.04896	1.00127	0.00182707	1	1
AU023871	1.26843	0	2.53687	Inf	Inf	0.30313	0.5943
AU040320	1825.09	1789.29	1860.89	1.04001	0.0565996	0.620827	0.903285
AU041133	78.4065	91.8872	64.9259	0.706582	-0.50107	0.0949025	0.262052
AV249152	108.883	110.45	107.317	0.971633	-0.0415171	0.991796	1
AV320801	0	0	0	NA	NA	NA	NA
AW011738	41.8732	28.1354	55.611	1.97655	0.982986	0.0207615	0.0816576
AW112010	0.262239	0	0.524479	Inf	Inf	1	1
AW146020	115.957	131.996	99.9175	0.756973	-0.401686	0.0956428	0.263571
AW146154	66.1225	69.8899	62.3551	0.892189	-0.164578	0.606182	0.89075
AW209491	121.866	131.097	112.636	0.85918	-0.218968	0.33047	0.627472
AW549877	2289.36	2503.9	2074.81	0.828632	-0.271196	0.0263789	0.0984383
AW551984	5685.92	6201.75	5170.09	0.83365	-0.262487	0.105394	0.28354
AW554918	596.978	765.345	428.612	0.560025	-0.836437	2.31285e-08	1.01017e-06
AW555464	3676.14	4193.98	3158.31	0.753057	-0.409169	0.00776599	0.0384835
AY026312	0	0	0	NA	NA	NA	NA
AY074887	8.98612	8.68004	9.29219	1.07052	0.0983174	0.951398	1
AY358078	1.48724	1.04763	1.92686	1.83926	0.879123	0.867221	1
AY512915	0	0	0	NA	NA	NA	NA
AY512931	52.2825	52.9787	51.5863	0.973716	-0.0384263	0.925885	1
AY761184	0	0	0	NA	NA	NA	NA
AY761185	0	0	0	NA	NA	NA	NA
Aaas	463.474	401.983	524.966	1.30594	0.385092	0.0140871	0.0612614
Aacs	3337.83	3984.92	2690.73	0.675229	-0.566551	2.00997e-06	4.51628e-05
Aadac	0	0	0	NA	NA	NA	NA
Aadacl2	0	0	0	NA	NA	NA	NA
Aadacl3	0	0	0	NA	NA	NA	NA
Aadat	12.5431	12.1227	12.9635	1.06936	0.096752	0.921419	1
Aagab	1533.53	1627.08	1439.98	0.885009	-0.176237	0.190244	0.432006
Aak1	3977.88	4616.91	3338.84	0.723176	-0.46758	6.728e-05	0.000814875
Aamp	3171.69	3177.94	3165.44	0.996066	-0.00568721	0.918698	1
Aanat	3.64181	4.0399	3.24371	0.802919	-0.316674	0.868669	1
Aard	20.1749	20.2032	20.1465	0.997193	-0.00405589	1	1
Aars	6668.03	7752.76	5583.3	0.720169	-0.473593	0.000115625	0.00128298
Aars2	409.398	436.542	382.253	0.875637	-0.191595	0.226153	0.488221
Aarsd1	758.528	722.838	794.219	1.09875	0.135863	0.356968	0.65865
Aasdh	221.045	227.928	214.161	0.939596	-0.089887	0.654452	0.92959
Aasdhppt	585.401	645.619	525.183	0.813456	-0.297863	0.0470867	0.153777
Aass	10.0636	6.28578	13.8414	2.20203	1.13883	0.185615	0.424616
Aatf	618.382	691.72	545.044	0.787954	-0.343816	0.027139	0.100815
Aatk	2301.37	2541.61	2061.14	0.810957	-0.302303	0.0498504	0.160934
Abat	5394.53	5423.07	5365.99	0.989474	-0.015266	0.903464	1
Abca1	1225.81	859.635	1591.98	1.85193	0.889028	0.00276616	0.01698
Abca12	6.99794	4.19052	9.80535	2.33989	1.22644	0.268662	0.546432
Abca13	7.65798	9.27879	6.03716	0.650641	-0.620067	0.526345	0.831513
Abca14	0	0	0	NA	NA	NA	NA
Abca15	0	0	0	NA	NA	NA	NA
Abca16	0	0	0	NA	NA	NA	NA
Abca17	5.84121	4.9384	6.74401	1.36563	0.449563	0.807261	1
Abca2	2532.3	2753.95	2310.65	0.839031	-0.253204	0.0664225	0.200112
Abca3	4825.84	5694.98	3956.69	0.694768	-0.525396	7.61499e-05	0.000904054
Abca4	14.101	11.8237	16.3783	1.38521	0.470109	0.488678	0.797447
Abca5	1637.68	2055.2	1220.16	0.593693	-0.752211	0.000158314	0.00166725
Abca6	5.00015	6.58552	3.41477	0.518527	-0.94751	0.537675	0.84126
Abca7	682.564	740.793	624.335	0.842793	-0.24675	0.0848787	0.241
Abca8a	35.535	29.4828	41.5872	1.41056	0.496269	0.316257	0.610336
Abca8b	90.6217	96.376	84.8674	0.880586	-0.183464	0.435095	0.744446
Abca9	82.9992	62.256	103.742	1.66638	0.736718	0.0151762	0.0646336
Abcb10	582.531	553.428	611.635	1.10517	0.144274	0.35963	0.661713
Abcb11	1.79721	1.49651	2.09791	1.40187	0.487356	1	1
Abcb1a	1.52934	2.09526	0.96343	0.459814	-1.12088	0.788876	1
Abcb1b	80.0853	56.7189	103.452	1.82394	0.867057	0.00576755	0.0304948
Abcb4	8.95258	10.0267	7.87849	0.785753	-0.347851	0.685374	0.94902
Abcb5	0.524479	0	1.04896	Inf	Inf	0.762787	0.990378
Abcb6	964.728	1015.71	913.745	0.899612	-0.152626	0.256845	0.530613
Abcb7	607.042	632.897	581.187	0.918296	-0.122968	0.382499	0.686841
Abcb8	888.37	916.792	859.948	0.937997	-0.0923453	0.489365	0.797933
Abcb9	528.485	613.291	443.678	0.723438	-0.467058	0.00265724	0.016463
Abcc1	335.273	253.215	417.33	1.64812	0.720823	6.2708e-05	0.000769338
Abcc10	376.611	400.334	352.888	0.881485	-0.181992	0.309117	0.601718
Abcc12	23.5582	19.6045	27.5118	1.40335	0.48887	0.405792	0.714357
Abcc2	2.07504	2.39426	1.75581	0.733339	-0.447448	0.950993	1
Abcc3	3.17209	2.84388	3.5003	1.23082	0.299615	0.925124	1
Abcc4	198.714	181.084	216.344	1.19472	0.256668	0.247095	0.518082
Abcc5	2407.58	2459.74	2355.43	0.957592	-0.0625169	0.579518	0.873344
Abcc6	1.82938	1.64638	2.01239	1.22231	0.28961	1	1
Abcc8	271.08	309.336	232.824	0.752659	-0.409931	0.0601896	0.185686
Abcc9	15.4894	15.5638	15.4149	0.99043	-0.0138731	0.985331	1
Abcd1	155.868	124.067	187.669	1.51264	0.597071	0.00745819	0.0372765
Abcd2	122.475	157.887	87.0621	0.55142	-0.858776	0.000585956	0.00482877
Abcd3	1981.91	1943.3	2020.52	1.03973	0.0562143	0.689724	0.951894
Abcd4	197.758	187.821	207.696	1.10582	0.145115	0.476724	0.786082
Abce1	2887.25	3174.98	2599.52	0.818752	-0.288502	0.0141246	0.0614043
Abcf1	1689.08	1723.45	1654.72	0.960122	-0.0587109	0.67068	0.939906
Abcf2	996.255	1060.32	932.194	0.879166	-0.185793	0.166531	0.393026
Abcf3	1080.01	1140.23	1019.8	0.894381	-0.161038	0.218955	0.477686
Abcg1	256.595	348.245	164.945	0.473647	-1.07811	0.000185942	0.00189931
Abcg2	199.81	146.215	253.405	1.7331	0.793354	0.000180491	0.00185203
Abcg3	0.224439	0.448878	0	0	#NAME?	0.983977	1
Abcg4	743.9	847.8	640	0.754896	-0.405651	0.0117794	0.0534153
Abcg5	1.04763	2.09526	0	0	#NAME?	0.368157	0.670804
Abcg8	0.711117	0.897756	0.524479	0.58421	-0.77544	0.972299	1
Abhd1	6.11407	5.38728	6.84085	1.26982	0.34462	0.824344	1
Abhd10	224.415	218.794	230.037	1.05139	0.0722967	0.818355	1
Abhd11	634.059	626.464	641.654	1.02425	0.0345653	0.790613	1
Abhd12	1980.82	1938.81	2022.83	1.04334	0.0612082	0.591144	0.880892
Abhd12b	0.706154	0.448878	0.96343	2.14631	1.10186	1	1
Abhd13	664.075	719.84	608.31	0.845063	-0.242869	0.0898746	0.251683
Abhd14a	222.548	197.394	247.703	1.25487	0.327539	0.12477	0.319842
Abhd14b	180.132	198.596	161.668	0.814051	-0.296808	0.209674	0.463909
Abhd15	8.0452	6.28504	9.80535	1.56011	0.641649	0.63531	0.914599
Abhd16a	830.521	758.902	902.139	1.18874	0.249436	0.0782748	0.226421
Abhd16b	1.22997	1.49651	0.96343	0.643786	-0.635348	0.964126	1
Abhd2	464.78	542.353	387.207	0.713939	-0.486127	0.00203688	0.0132585
Abhd3	70.7198	61.6573	79.7823	1.29396	0.371798	0.307076	0.599096
Abhd4	1341.55	960.96	1722.15	1.79211	0.841661	0.00962841	0.0455433
Abhd5	323.177	290.335	356.019	1.22623	0.294235	0.110933	0.294652
Abhd6	266.485	284.496	248.473	0.87338	-0.195318	0.307039	0.599096
Abhd8	2311.95	2382.86	2241.04	0.940484	-0.0885253	0.55644	0.857065
Abi1	1882.47	2001.22	1763.72	0.881325	-0.182254	0.144114	0.355457
Abi2	4448	5204.15	3691.86	0.709406	-0.495316	1.8245e-05	0.00027456
Abi3	2.03827	1.79625	2.28028	1.26947	0.344223	0.891316	1
Abi3bp	44.6149	23.9441	65.2856	2.72658	1.44709	0.204376	0.455469
Abl1	1740.44	1643.07	1837.8	1.11851	0.161582	0.203084	0.453644
Abl2	2365.58	2732.24	1998.91	0.731602	-0.450868	0.000437724	0.00383179
Ablim1	1189.07	1251.87	1126.26	0.899668	-0.152535	0.220896	0.480909
Ablim2	1201.14	1498.21	904.082	0.603443	-0.728711	3.79557e-08	1.55965e-06
Ablim3	3758.17	4101.34	3415	0.832655	-0.264209	0.0313897	0.11263
Abo	0	0	0	NA	NA	NA	NA
Abp1	0.438952	0	0.877903	Inf	Inf	0.785423	1
Abpa	0	0	0	NA	NA	NA	NA
Abpb	0	0	0	NA	NA	NA	NA
Abpd	0.299376	0.598751	0	0	#NAME?	0.983978	1
Abpe	0	0	0	NA	NA	NA	NA
Abpg	0	0	0	NA	NA	NA	NA
Abpz	0	0	0	NA	NA	NA	NA
Abr	4522.83	4881.38	4164.27	0.853094	-0.229224	0.0546414	0.172412
Abra	0	0	0	NA	NA	NA	NA
Abt1	249.428	262.651	236.205	0.899312	-0.153106	0.493077	0.801662
Abtb1	372.001	378.622	365.379	0.965022	-0.051366	0.676515	0.943796
Abtb2	337.178	395.246	279.109	0.706165	-0.501923	0.00481693	0.0264314
Acaa1a	558.705	574.384	543.026	0.945407	-0.0809929	0.59384	0.881988
Acaa1b	18.0763	21.2509	14.9017	0.701229	-0.512042	0.445118	0.755064
Acaa2	311.847	236.012	387.681	1.64263	0.716011	0.0151317	0.0645052
Acaca	3506.81	4116.88	2896.74	0.703625	-0.507121	1.28296e-05	0.000206167
Acacb	16.4299	17.3593	15.5004	0.892915	-0.163406	0.761631	0.990378
Acad10	46.1391	49.5339	42.7443	0.862932	-0.212682	0.518329	0.825127
Acad11	222.273	207.724	236.821	1.14008	0.189134	0.387171	0.692612
Acad8	344.06	338.822	349.297	1.03092	0.0439284	0.86795	1
Acad9	776.277	796.178	756.377	0.95001	-0.0739851	0.631603	0.912108
Acadl	532.211	324.609	739.812	2.27909	1.18846	0.000202116	0.0020345
Acadm	495.314	461.239	529.39	1.14776	0.198816	0.221438	0.481798
Acads	159.584	112.544	206.624	1.83595	0.876524	0.000116907	0.00129323
Acadsb	852.499	749.482	955.516	1.2749	0.350386	0.0119649	0.0540253
Acadvl	701.046	571.233	830.858	1.4545	0.540521	0.000283095	0.00267041
Acan	43.6671	43.7007	43.6336	0.998464	-0.00221757	0.975015	1
Acap1	7.02742	7.93216	6.12269	0.771882	-0.373548	0.749815	0.985841
Acap2	1003.77	999.847	1007.68	1.00784	0.011266	0.946056	1
Acap3	2319.53	2646.69	1992.36	0.752772	-0.409716	0.00102841	0.00762015
Acat1	3326.18	3210.6	3441.76	1.072	0.100303	0.354163	0.655987
Acat2	2926.02	3025.46	2826.58	0.934266	-0.0980943	0.43454	0.74424
Acat3	5.55146	6.28578	4.81715	0.766357	-0.383911	0.829298	1
Acbd3	1438.37	1432.66	1444.08	1.00798	0.0114602	0.995315	1
Acbd4	79.7671	77.5231	82.011	1.05789	0.0811919	0.752763	0.987984
Acbd5	1485.59	1646.24	1324.94	0.804828	-0.313247	0.0165087	0.0689061
Acbd6	1032.64	1053.28	1011.99	0.960792	-0.0577036	0.669925	0.939704
Acbd7	13.3524	10.3264	16.3783	1.58606	0.665446	0.387605	0.692833
Accn1	1016.03	1142.17	889.894	0.779123	-0.360076	0.00736114	0.0369344
Accn2	2481.86	2746.79	2216.93	0.807096	-0.309187	0.0112772	0.0516245
Accn3	22.8825	21.4	24.365	1.13855	0.187199	0.793371	1
Accn4	354.649	422.031	287.267	0.680678	-0.554956	0.00127456	0.00909268
Accn5	0.481715	0	0.96343	Inf	Inf	0.773607	0.992755
Accs	54.4427	55.971	52.9144	0.94539	-0.0810183	0.828181	1
Accsl	7.48626	10.3264	4.6461	0.449923	-1.15225	0.291261	0.578159
Acd	787.778	745.595	829.962	1.11315	0.154654	0.251722	0.524544
Ace	385.5	434.594	336.407	0.774071	-0.369462	0.144868	0.356925
Ace2	10.1581	9.27953	11.0367	1.18936	0.250183	0.745072	0.982187
Acer1	2.98442	2.99302	2.97582	0.994254	-0.00831371	1	1
Acer2	18.3615	11.075	25.6479	2.31583	1.21153	0.125144	0.320526
Acer3	361.767	318.175	405.359	1.27401	0.349378	0.0383085	0.130703
Ache	1321.22	1365.63	1276.8	0.934957	-0.0970277	0.526136	0.831414
Acin1	2754.29	3016.17	2492.41	0.826347	-0.27518	0.0186066	0.0752713
Acly	17436.9	19485	15388.8	0.789777	-0.340482	0.00231927	0.014698
Acmsd	20.406	19.0065	21.8055	1.14727	0.1982	0.798231	1
Acn9	67.1467	68.8431	65.4504	0.950718	-0.0729101	0.904558	1
Acnat1	86.2134	87.0979	85.329	0.97969	-0.0296029	0.873775	1
Acnat2	0	0	0	NA	NA	NA	NA
Aco1	1411.92	1389.72	1434.12	1.03196	0.0453804	0.757697	0.989764
Aco2	10537.3	11014.3	10060.4	0.913398	-0.130684	0.258059	0.53243
Acot1	216.112	154.601	277.623	1.79574	0.844575	0.12009	0.311034
Acot10	0	0	0	NA	NA	NA	NA
Acot11	57.2249	48.4863	65.9635	1.36046	0.444092	0.276166	0.557114
Acot12	1.18787	0.448878	1.92686	4.29261	2.10186	0.671844	0.939906
Acot13	351.942	320.417	383.468	1.19678	0.259157	0.140811	0.349948
Acot2	26.6434	16.7621	36.5248	2.17902	1.12368	0.0285605	0.104648
Acot3	3.12866	3.89151	2.36581	0.607941	-0.717996	0.816496	1
Acot4	1.44944	1.49651	1.40238	0.937103	-0.0937206	1	1
Acot5	0.957803	0.598751	1.31685	2.19934	1.13707	0.833428	1
Acot6	9.02086	11.8222	6.21953	0.52609	-0.926619	0.289125	0.575462
Acot7	5549.9	5539.25	5560.54	1.00384	0.00553302	0.895869	1
Acot8	247.13	257.862	236.399	0.916766	-0.125374	0.603486	0.888599
Acot9	431.873	442.089	421.657	0.953782	-0.0682691	0.728574	0.973562
Acox1	3990.57	4327.31	3653.84	0.844367	-0.244059	0.029701	0.107938
Acox2	1.11227	1.34663	0.877903	0.651924	-0.617225	0.963609	1
Acox3	370.584	361.72	379.448	1.04901	0.0690288	0.669365	0.939647
Acoxl	3.63225	3.14289	4.12162	1.31141	0.39112	0.835852	1
Acp1	1234.67	1148.17	1321.18	1.15069	0.202494	0.1282	0.326404
Acp2	1078.57	1052.24	1104.9	1.05005	0.0704612	0.60238	0.888048
Acp5	12.4277	8.2319	16.6236	2.01941	1.01393	0.446746	0.756329
Acp6	133.611	99.671	167.551	1.68104	0.749358	0.002821	0.017211
Acpl2	157.804	170.158	145.449	0.854787	-0.226363	0.329295	0.626496
Acpp	7.38184	6.43491	8.32876	1.29431	0.372183	0.77346	0.992755
Acpt	1.30491	1.64638	0.96343	0.585181	-0.773046	0.964417	1
Acr	37.8368	37.564	38.1096	1.01452	0.0208009	0.980112	1
Acrbp	247.379	241.246	253.513	1.05085	0.0715565	0.747668	0.984456
Acrv1	0.224439	0.448878	0	0	#NAME?	0.983977	1
Acsbg1	330.878	217.9	443.856	2.03697	1.02643	1.05796e-08	5.18834e-07
Acsbg2	0.224439	0.448878	0	0	#NAME?	0.983977	1
Acsf2	338.82	239	438.64	1.83532	0.876028	1.12945e-06	2.76946e-05
Acsf3	321.75	344.958	298.543	0.865446	-0.208484	0.281892	0.565102
Acsl1	386.422	413.502	359.342	0.869021	-0.202538	0.228917	0.492063
Acsl3	4490.11	5317.4	3662.82	0.688837	-0.537766	5.16871e-06	9.8545e-05
Acsl4	3912.66	4621.81	3203.51	0.693129	-0.528804	0.00327588	0.0194778
Acsl5	170.846	162.225	179.466	1.10628	0.145711	0.602033	0.887856
Acsl6	1076.55	1168.81	984.298	0.842137	-0.247874	0.0594412	0.183977
Acsm1	0	0	0	NA	NA	NA	NA
Acsm2	4.38613	4.04064	4.73162	1.17101	0.22775	0.964285	1
Acsm3	1.26843	0	2.53687	Inf	Inf	0.30313	0.5943
Acsm4	0	0	0	NA	NA	NA	NA
Acsm5	0.781091	0.598751	0.96343	1.60907	0.686223	1	1
Acss1	97.1679	68.8445	125.491	1.82282	0.866172	0.0101206	0.047376
Acss2	555.862	585.75	525.975	0.897952	-0.15529	0.274087	0.554369
Acss3	3.16179	1.94539	4.3782	2.25056	1.17028	0.58343	0.874756
Acta1	29.2027	29.7818	28.6237	0.961115	-0.0572195	0.879829	1
Acta2	520.249	372.038	668.461	1.79676	0.845395	3.96367e-05	0.00052339
Actb	17463.8	15134.1	19793.6	1.30789	0.387236	0.000288732	0.00271585
Actbl2	0.219476	0	0.438952	Inf	Inf	1	1
Actc1	5.63832	4.19052	7.08612	1.69099	0.757867	0.638771	0.917173
Actg1	57730.2	52218.7	63241.7	1.21109	0.276308	0.0100293	0.0471176
Actg2	3.5825	5.23815	1.92686	0.367851	-1.4428	0.399493	0.707546
Actl6a	295.263	255.315	335.211	1.31293	0.392789	0.0338536	0.119073
Actl6b	1816.16	1824.92	1807.4	0.990398	-0.0139195	0.975161	1
Actl7a	1.34767	1.64638	1.04896	0.637129	-0.650342	0.964572	1
Actl7b	4.00723	2.84388	5.17058	1.81814	0.862463	0.527039	0.832293
Actl9	0.224439	0.448878	0	0	#NAME?	0.983977	1
Actn1	1608.72	1478.74	1738.69	1.17579	0.233631	0.0741997	0.21739
Actn2	71.7665	74.8276	68.7054	0.918182	-0.123147	0.741076	0.979359
Actn3	75.8558	81.2618	70.4499	0.86695	-0.20598	0.499864	0.807373
Actn4	3252.76	2888.98	3616.54	1.25184	0.324053	0.00670901	0.0342647
Actr10	2683.48	2782.15	2584.8	0.929068	-0.106143	0.420364	0.730808
Actr1a	6801.17	7101.97	6500.38	0.915292	-0.127696	0.272551	0.551948
Actr1b	2585.5	2679.01	2492	0.930194	-0.104396	0.388665	0.694105
Actr2	6234.29	6438.44	6030.14	0.936584	-0.0945199	0.446984	0.756447
Actr3	6169.72	6324.66	6014.77	0.951002	-0.0724794	0.54798	0.84956
Actr3b	409.396	419.484	399.309	0.951906	-0.0711087	0.742896	0.980612
Actr5	187.53	229.121	145.94	0.636955	-0.650737	0.00172855	0.0116431
Actr6	471.527	542.21	400.843	0.739277	-0.435812	0.00634664	0.0327017
Actr8	300.377	319.365	281.389	0.88109	-0.182639	0.301664	0.592081
Actrt1	0	0	0	NA	NA	NA	NA
Actrt2	0	0	0	NA	NA	NA	NA
Acvr1	621.141	630.048	612.233	0.971725	-0.0413805	0.716955	0.969036
Acvr1b	1684.2	1916.2	1452.21	0.757861	-0.399994	0.00132138	0.00935768
Acvr1c	8.53522	10.3264	6.74401	0.653083	-0.614662	0.544087	0.846988
Acvr2a	3072.54	3576.64	2568.44	0.718115	-0.477714	6.10896e-05	0.000752361
Acvr2b	105.869	109.546	102.191	0.932868	-0.100256	0.797496	1
Acvrl1	2.95291	1.79551	4.1103	2.28921	1.19485	0.750751	0.986243
Acy1	174.984	139.181	210.786	1.51447	0.598817	0.0342566	0.120138
Acy3	12.5776	8.68004	16.4752	1.89805	0.924518	0.227758	0.490357
Acyp1	213.311	162.826	263.797	1.62012	0.696104	0.000971552	0.00728476
Acyp2	202.248	176.449	228.047	1.29243	0.370081	0.0572241	0.178588
Ada	25.8858	19.4539	32.3177	1.66125	0.732267	0.225979	0.488021
Adad1	0	0	0	NA	NA	NA	NA
Adad2	0.262239	0	0.524479	Inf	Inf	1	1
Adal	375.139	437.899	312.379	0.713358	-0.487302	0.00452726	0.0251797
Adam10	1919.92	1607.31	2232.54	1.38899	0.474038	0.000154857	0.00163371
Adam11	825.562	923.669	727.456	0.787573	-0.344515	0.0158357	0.0668149
Adam12	242.741	168.662	316.82	1.87843	0.909525	4.97766e-06	9.57136e-05
Adam15	1644.22	1538.16	1750.28	1.1379	0.186373	0.145463	0.357657
Adam17	533.795	343.012	724.579	2.1124	1.07888	7.31068e-12	1.10569e-09
Adam18	0.786054	1.04763	0.524479	0.500634	-0.998173	0.972576	1
Adam19	796.447	724.638	868.256	1.19819	0.26086	0.0755774	0.220568
Adam1a	109.78	103.413	116.147	1.12315	0.167545	0.561671	0.860811
Adam1b	1.04333	0.598751	1.48791	2.48502	1.31326	0.825651	1
Adam2	0.224439	0.448878	0	0	#NAME?	0.983977	1
Adam21	27.2586	31.1269	23.3902	0.751447	-0.412257	0.368318	0.670883
Adam22	2720.28	2907.51	2533.04	0.871205	-0.198917	0.141767	0.351625
Adam23	2804.38	3039.81	2568.95	0.845102	-0.242803	0.0416967	0.139326
Adam24	0	0	0	NA	NA	NA	NA
Adam25	0	0	0	NA	NA	NA	NA
Adam26a	0	0	0	NA	NA	NA	NA
Adam26b	0	0	0	NA	NA	NA	NA
Adam28	8.26371	8.38104	8.14639	0.972003	-0.0409672	1	1
Adam29	0	0	0	NA	NA	NA	NA
Adam3	0.224439	0.448878	0	0	#NAME?	0.983977	1
Adam30	1.18787	0.448878	1.92686	4.29261	2.10186	0.671844	0.939906
Adam32	16.3126	18.2593	14.3659	0.786772	-0.345982	0.707869	0.963928
Adam33	5.22127	4.04064	6.4019	1.58438	0.663915	0.61678	0.899763
Adam34	0	0	0	NA	NA	NA	NA
Adam39	0	0	0	NA	NA	NA	NA
Adam4	2.53984	3.59177	1.48791	0.414255	-1.27141	0.551598	0.852525
Adam5	5.88893	5.38728	6.39059	1.18624	0.246391	0.988132	1
Adam6a	0	0	0	NA	NA	NA	NA
Adam6b	0	0	0	NA	NA	NA	NA
Adam7	1.22501	1.04763	1.40238	1.33862	0.420751	1	1
Adam8	93.1644	83.0595	103.269	1.24332	0.314195	0.287575	0.573398
Adam9	1517.42	1071.83	1963.02	1.83147	0.873002	6.18768e-06	0.000114187
Adamdec1	4.29065	2.54414	6.03716	2.37297	1.24669	0.449984	0.759525
Adamts1	816.731	399.594	1233.87	3.0878	1.62658	0.017782	0.0727201
Adamts10	1587.26	1443.87	1730.64	1.19861	0.261358	0.0469036	0.153402
Adamts12	235.348	169.856	300.84	1.77115	0.824685	5.13551e-05	0.000649509
Adamts13	1.75941	1.94539	1.57344	0.808804	-0.306138	0.95752	1
Adamts14	45.5652	30.6795	60.4508	1.9704	0.978486	0.0140803	0.0612565
Adamts15	146.466	140.077	152.855	1.09122	0.125936	0.646583	0.922907
Adamts16	48.4046	41.0045	55.8047	1.36094	0.444607	0.292367	0.57939
Adamts17	361.48	371.594	351.366	0.945566	-0.0807503	0.592572	0.881511
Adamts18	70.5165	86.3515	54.6816	0.633244	-0.659167	0.0450735	0.148632
Adamts19	101.384	93.3867	109.381	1.17127	0.22807	0.435013	0.744378
Adamts2	795.99	509.871	1082.11	2.12232	1.08564	8.22868e-05	0.000968605
Adamts20	211.992	221.042	202.942	0.918112	-0.123258	0.511731	0.818388
Adamts3	295.176	300.954	289.399	0.961605	-0.0564833	0.732373	0.976208
Adamts4	172.832	100.718	244.945	2.43199	1.28214	4.90943e-05	0.000626222
Adamts5	130.069	123.32	136.818	1.10946	0.149858	0.516028	0.82241
Adamts6	125.497	139.031	111.963	0.805312	-0.312381	0.212936	0.469181
Adamts7	608.146	439.095	777.198	1.77	0.823749	4.14544e-05	0.000544198
Adamts8	97.2334	56.8673	137.599	2.41966	1.2748	1.6557e-05	0.000254044
Adamts9	503.634	351.097	656.171	1.86892	0.902204	0.0392339	0.133032
Adamtsl1	1209.51	1129.01	1290.02	1.14262	0.19234	0.160374	0.382915
Adamtsl2	33.1112	29.3329	36.8896	1.25762	0.330694	0.464095	0.772833
Adamtsl3	65.0434	50.4353	79.6515	1.57928	0.659267	0.378742	0.682615
Adamtsl4	23.9704	12.7214	35.2193	2.7685	1.4691	0.00647441	0.0332079
Adamtsl5	6.36635	3.89077	8.84192	2.27254	1.1843	0.362177	0.664606
Adap1	3759.38	4049.43	3469.33	0.856745	-0.223063	0.0665412	0.200336
Adap2	0.481715	0	0.96343	Inf	Inf	0.773607	0.992755
Adar	3918.02	4785.85	3050.18	0.637333	-0.64988	7.646e-07	1.98004e-05
Adarb1	1365.28	1680.5	1050.06	0.624848	-0.678422	2.29149e-07	7.36468e-06
Adarb2	407.971	551.177	264.766	0.480365	-1.0578	1.21281e-09	8.58608e-08
Adat1	102.794	118.675	86.9137	0.732366	-0.449363	0.0887788	0.249546
Adat2	82.0251	69.2919	94.7583	1.36752	0.451564	0.140705	0.349854
Adat3	42.5976	50.1356	35.0595	0.699294	-0.516028	0.250446	0.522795
Adc	311.886	280.01	343.762	1.22768	0.295932	0.105529	0.283588
Adck1	607.579	666.123	549.034	0.824224	-0.278892	0.0652943	0.197441
Adck2	392.44	396.139	388.74	0.981323	-0.0272002	0.880202	1
Adck3	149.921	167.317	132.526	0.792062	-0.336314	0.14865	0.36321
Adck4	419.379	381.18	457.578	1.20042	0.263545	0.104576	0.281929
Adck5	265.837	331.481	200.193	0.603936	-0.727532	0.00225713	0.0143903
Adcy1	11375.4	12761.9	9988.85	0.782707	-0.353456	0.146713	0.359649
Adcy10	6.81294	8.97979	4.6461	0.517395	-0.950662	0.443843	0.753683
Adcy2	2217.44	2464.69	1970.2	0.799371	-0.323062	0.00728182	0.0366596
Adcy3	144.415	156.087	132.742	0.850435	-0.233726	0.359988	0.662114
Adcy4	0.262239	0	0.524479	Inf	Inf	1	1
Adcy5	1221.48	1317.43	1125.53	0.854342	-0.227114	0.093792	0.259983
Adcy6	1280.16	1104.16	1456.17	1.3188	0.399226	0.00231755	0.0146923
Adcy7	190.464	191.861	189.066	0.985434	-0.0211687	0.883576	1
Adcy8	1510.53	1715.65	1305.41	0.760886	-0.394248	0.00141036	0.00984243
Adcy9	444.079	607.299	280.859	0.462472	-1.11256	4.0312e-08	1.63042e-06
Adcyap1	2.5362	1.04763	4.02477	3.84179	1.94178	0.393412	0.699874
Adcyap1r1	3154.55	3223.14	3085.97	0.95744	-0.0627463	0.546243	0.848217
Add1	6378.7	6591.35	6166.06	0.935477	-0.0962258	0.410438	0.719878
Add2	1281.74	1437.14	1126.34	0.783738	-0.351556	0.0603878	0.185948
Add3	1277.14	1348.12	1206.16	0.894702	-0.160521	0.204137	0.455244
Adh1	8.5425	7.18279	9.9022	1.3786	0.463204	0.731176	0.975428
Adh4	0.82319	1.64638	0	0	#NAME?	0.509439	0.816099
Adh5	1450.69	1316.54	1584.85	1.2038	0.267599	0.0315698	0.113163
Adh6-ps1	0	0	0	NA	NA	NA	NA
Adh6a	0.262239	0	0.524479	Inf	Inf	1	1
Adh7	0.224439	0.448878	0	0	#NAME?	0.983977	1
Adhfe1	95.6566	70.1889	121.124	1.72569	0.787172	0.00641223	0.0329359
Adi1	294.502	263.695	325.309	1.23365	0.302936	0.106894	0.28629
Adig	0.88783	0.897756	0.877903	0.977886	-0.0322622	1	1
Adipoq	3.16046	4.04064	2.28028	0.564337	-0.825371	0.704324	0.962024
Adipor1	2541.77	2354.1	2729.43	1.15944	0.213428	0.0796132	0.229518
Adipor2	2147.48	2261.77	2033.18	0.898934	-0.153713	0.204223	0.455296
Adk	427.185	335.828	518.542	1.54407	0.626736	0.000173223	0.00179279
Adm	15.7119	11.3741	20.0497	1.76275	0.817832	0.251397	0.524231
Adm2	0.224439	0.448878	0	0	#NAME?	0.983977	1
Adnp	4460.22	5670.19	3250.26	0.573218	-0.802843	3.13143e-12	5.21847e-10
Adnp2	679.731	855.133	504.329	0.589767	-0.761783	1.33794e-07	4.67576e-06
Ado	1099.36	1376.39	822.323	0.597447	-0.743117	3.01986e-08	1.26989e-06
Adora1	1093.88	1226.15	961.616	0.784255	-0.350606	0.00967928	0.0457478
Adora2a	18.9187	17.9588	19.8786	1.1069	0.146523	0.881254	1
Adora2b	13.6849	8.97905	18.3907	2.04818	1.03434	0.189405	0.430908
Adora3	0	0	0	NA	NA	NA	NA
Adpgk	578.457	472.617	684.297	1.44789	0.53395	0.000432109	0.00379001
Adprh	1705.7	1535.79	1875.62	1.22127	0.288388	0.0175318	0.071991
Adprhl1	0.299376	0.598751	0	0	#NAME?	0.983978	1
Adprhl2	482.967	564.35	401.584	0.711587	-0.490888	0.00156484	0.0107128
Adra1a	50.2049	47.5922	52.8176	1.1098	0.150294	0.670073	0.939704
Adra1b	354.339	407.512	301.165	0.739033	-0.43629	0.012478	0.0557821
Adra1d	14.3231	15.4147	13.2314	0.858365	-0.220336	0.819365	1
Adra2a	215.862	227.626	204.099	0.896642	-0.157396	0.401128	0.708985
Adra2b	1.64171	1.79551	1.48791	0.828682	-0.27111	0.957045	1
Adra2c	45.345	39.959	50.731	1.26957	0.344345	0.357253	0.65893
Adrb1	26.5874	20.5037	32.6711	1.59342	0.67213	0.181153	0.417518
Adrb2	5.51069	3.14289	7.87849	2.50677	1.32583	0.305624	0.59746
Adrb3	17.8751	10.1765	25.5737	2.513	1.32941	0.0434337	0.144149
Adrbk1	2029.8	1970.08	2089.51	1.06062	0.0849089	0.462419	0.770826
Adrbk2	811.057	818.01	804.103	0.982999	-0.0247383	0.816242	1
Adrm1	1812.9	1918.77	1707.03	0.889646	-0.168697	0.219299	0.478186
Adsl	745.537	762.957	728.118	0.954337	-0.0674295	0.706097	0.962931
Adss	2076.3	2085.6	2066.99	0.991074	-0.0129355	0.875966	1
Adssl1	15.0995	14.5162	15.6828	1.08036	0.111518	0.95632	1
Aebp1	613.324	399.124	827.524	2.07335	1.05196	3.07067e-07	9.35126e-06
Aebp2	493.902	448.967	538.837	1.20017	0.263238	0.118201	0.308005
Aen	988.378	935.658	1041.1	1.11269	0.15405	0.266175	0.542989
Aes	4776.93	4555.87	4997.99	1.09704	0.133619	0.214454	0.471233
Afap1	1672.62	1811.29	1533.95	0.846881	-0.23977	0.0543124	0.171674
Afap1l1	124.47	123.318	125.622	1.01869	0.0267105	0.92369	1
Afap1l2	25.5093	24.5444	26.4742	1.07863	0.109196	0.778141	0.996402
Aff1	171.955	107.602	236.308	2.19612	1.13496	6.6658e-07	1.75911e-05
Aff2	449.053	563.45	334.657	0.593944	-0.751602	2.20264e-06	4.85822e-05
Aff3	2468.43	3188.28	1748.58	0.548438	-0.866598	7.90573e-13	1.52997e-10
Aff4	3822.71	4118.23	3527.2	0.856483	-0.223504	0.0412541	0.138295
Afg3l1	1134.13	1087.25	1181.01	1.08624	0.119342	0.40143	0.709231
Afg3l2	1216.22	1280.15	1152.28	0.900115	-0.151819	0.209735	0.463909
Afm	0	0	0	NA	NA	NA	NA
Afmid	71.8095	64.8002	78.8189	1.21634	0.282544	0.451434	0.761044
Afp	1.08609	0.598751	1.57344	2.62786	1.39389	0.82202	1
Aftph	1086	1254.43	917.578	0.731472	-0.451125	0.000663121	0.00536204
Aga	169.078	120.773	217.382	1.79991	0.847928	0.000184924	0.00189255
Agap1	6837.79	8167.57	5508.01	0.674376	-0.568374	0.00236745	0.0149612
Agap2	6931.63	7357.33	6505.93	0.884278	-0.177428	0.14623	0.359052
Agap3	3092.45	3089.81	3095.09	1.00171	0.0024618	0.95587	1
Agbl1	4.79126	6.43565	3.14687	0.488975	-1.03217	0.441448	0.750962
Agbl2	8.11087	4.48952	11.7322	2.61324	1.38584	0.190936	0.433101
Agbl3	103.375	93.8355	112.915	1.20333	0.267031	0.322312	0.617256
Agbl4	50.2223	59.2623	41.1822	0.694915	-0.525093	0.150955	0.3668
Agbl5	562.049	536.066	588.033	1.09694	0.133488	0.399594	0.707655
Ager	75.8388	68.5433	83.1342	1.21287	0.278426	0.368192	0.670804
Agfg1	1053.53	1076.19	1030.88	0.957899	-0.0620551	0.673356	0.941068
Agfg2	778.494	1051.05	505.937	0.481363	-1.0548	3.03226e-13	6.65544e-11
Aggf1	756.727	718.954	794.499	1.10508	0.144145	0.33341	0.631655
Agk	726.995	729.275	724.714	0.993746	-0.00905126	0.967518	1
Agl	881.451	873.399	889.503	1.01844	0.0263583	0.912719	1
Agmat	0.711117	0.897756	0.524479	0.58421	-0.77544	0.972299	1
Agpat1	2362.87	2326.27	2399.47	1.03147	0.0447008	0.679919	0.945394
Agpat2	12.6406	10.4763	14.8049	1.41318	0.498944	0.512662	0.819366
Agpat3	1820.42	1639.5	2001.34	1.22071	0.287717	0.0189986	0.0764055
Agpat4	1071.75	1118.82	1024.68	0.915858	-0.126804	0.312115	0.605459
Agpat5	1096.28	1074.23	1118.34	1.04107	0.0580616	0.713938	0.967361
Agpat6	2306.41	2367.11	2245.71	0.948714	-0.0759546	0.518906	0.825681
Agpat9	37.9684	32.3259	43.6109	1.3491	0.431999	0.350415	0.65135
Agphd1	37.683	35.1698	40.1962	1.14292	0.192722	0.693224	0.954091
Agps	1137.47	1123.92	1151.01	1.0241	0.0343603	0.841979	1
Agr2	0	0	0	NA	NA	NA	NA
Agr3	0	0	0	NA	NA	NA	NA
Agrn	8792.65	7843.1	9742.2	1.24214	0.312825	0.0200186	0.0795354
Agrp	2.36448	2.09526	2.63371	1.25699	0.329968	0.916049	1
Agt	7.40872	6.58552	8.23192	1.25	0.321931	0.751367	0.986656
Agtpbp1	2712.26	3159.86	2264.65	0.716691	-0.480577	0.000256057	0.00245264
Agtr1a	15.252	11.2242	19.2799	1.71771	0.780489	0.257099	0.530953
Agtr1b	0	0	0	NA	NA	NA	NA
Agtr2	2797.2	1920.25	3674.14	1.91336	0.93611	0.00289163	0.0175467
Agtrap	99.7819	71.9859	127.578	1.77226	0.82559	0.043574	0.144508
Agxt	0	0	0	NA	NA	NA	NA
Agxt2	0.224439	0.448878	0	0	#NAME?	0.983977	1
Agxt2l1	0.748918	0.448878	1.04896	2.33684	1.22456	1	1
Agxt2l2	85.971	85.456	86.4861	1.01205	0.0172862	0.870135	1
Ahctf1	1433.05	1564.5	1301.59	0.831955	-0.265423	0.0291054	0.106342
Ahcy	1190.18	976.969	1403.4	1.43648	0.52254	0.000288818	0.00271585
Ahcyl1	4219.83	4218.2	4221.45	1.00077	0.00111023	1	1
Ahcyl2	1175.67	1287.5	1063.83	0.826275	-0.275305	0.0370757	0.127564
Ahdc1	875.113	1000.9	749.325	0.74865	-0.417637	0.00255204	0.0159043
Ahi1	12910	14019.7	11800.3	0.841694	-0.248632	0.0307521	0.110895
Ahnak	1039.92	654.745	1425.09	2.17655	1.12204	0.000232687	0.00227727
Ahr	167.383	142.023	192.743	1.35712	0.440553	0.0519418	0.165705
Ahrr	1.59932	1.79625	1.40238	0.780726	-0.357112	1	1
Ahsa1	1748.58	1761.17	1735.99	0.985703	-0.0207757	0.897181	1
Ahsa2	512.631	514.376	510.886	0.993214	-0.00982353	0.959224	1
Ahsg	0	0	0	NA	NA	NA	NA
Aicda	0.481715	0	0.96343	Inf	Inf	0.773607	0.992755
Aida	0	0	0	NA	NA	NA	NA
Aif1	2.60018	1.34663	3.85372	2.86174	1.51689	0.547832	0.849403
Aif1l	170.973	105.21	236.736	2.25014	1.17001	2.4037e-07	7.67843e-06
Aifm1	549.751	535.474	564.028	1.05333	0.0749509	0.635023	0.914599
Aifm2	286.968	287.046	286.891	0.999459	-0.000780056	0.9546	1
Aifm3	54.6894	63.0084	46.3704	0.735941	-0.442339	0.577821	0.872671
Aig1	524.051	548.34	499.762	0.91141	-0.133828	0.402267	0.710222
Aim1	8.41255	9.72767	7.09744	0.729613	-0.454796	0.68217	0.946924
Aim1l	8.97446	9.27805	8.67087	0.934557	-0.0976448	0.901302	1
Aim2	72.3738	78.4194	66.3283	0.845815	-0.241586	0.459211	0.767941
Aimp1	894.685	843.763	945.608	1.1207	0.164404	0.234495	0.499992
Aimp2	503.84	548.791	458.888	0.836181	-0.258114	0.101099	0.274943
Aip	797.015	800.074	793.956	0.992352	-0.0110756	0.96025	1
Aipl1	7.99051	8.53017	7.45086	0.873472	-0.195167	0.906687	1
Aire	0	0	0	NA	NA	NA	NA
Airn	103.572	87.3992	119.745	1.37009	0.454269	0.102655	0.278042
Ajap1	732.525	728.689	736.361	1.01053	0.0151111	0.819326	1
Ak1	1278.67	1168.53	1388.81	1.18852	0.249162	0.0448166	0.147974
Ak2	744.91	589.36	900.46	1.52786	0.611514	0.016523	0.0689339
Ak3	920.917	868.615	973.218	1.12042	0.164045	0.22925	0.492485
Ak4	121.426	88.2991	154.554	1.75034	0.807638	0.0284947	0.104492
Ak5	715.425	794.822	636.027	0.800213	-0.321543	0.0270928	0.100664
Ak7	40.1111	45.7952	34.4269	0.751758	-0.41166	0.340002	0.639024
Ak8	24.3266	22.8972	25.756	1.12485	0.169737	0.800925	1
Akap1	704.736	816.068	593.404	0.727149	-0.459676	0.00100885	0.00749375
Akap10	398.37	472.167	324.573	0.687411	-0.540755	0.00117357	0.00851
Akap11	4548.21	5958.38	3138.04	0.526659	-0.925059	8.79172e-12	1.297e-09
Akap12	5935.81	6246.66	5624.96	0.900475	-0.151241	0.180698	0.416841
Akap13	849.327	771.777	926.878	1.20097	0.264194	0.309934	0.602655
Akap14	2.2733	2.09526	2.45134	1.16995	0.226441	1	1
Akap17b	463.691	499.097	428.286	0.858122	-0.220745	0.238044	0.505584
Akap2	660.428	672.852	648.005	0.963072	-0.0542845	0.71866	0.969036
Akap3	25.2357	24.094	26.3774	1.09477	0.130626	0.858282	1
Akap4	0	0	0	NA	NA	NA	NA
Akap5	528.254	683.632	372.875	0.545432	-0.874528	2.15717e-08	9.58636e-07
Akap6	3149.79	3690.65	2608.93	0.706901	-0.500419	1.95061e-05	0.000290141
Akap7	200.575	193.505	207.644	1.07307	0.101743	0.631392	0.911875
Akap8	2210.92	2587.56	1834.27	0.708879	-0.496388	4.78283e-05	0.000613989
Akap8l	1511	1674.95	1347.06	0.80424	-0.314302	0.0131283	0.0579266
Akap9	2583.08	2895.72	2270.45	0.784071	-0.350944	0.00298858	0.0180437
Akirin1	795.759	773.425	818.093	1.05775	0.0810033	0.555158	0.855822
Akirin2	1223.69	1225.39	1221.99	0.997224	-0.00401066	0.978654	1
Akna	37.5733	31.8778	43.2688	1.35734	0.440778	0.299506	0.58919
Aknad1	1.30557	0.598751	2.01239	3.36097	1.74888	0.657891	0.93146
Akp3	1.70672	1.04763	2.36581	2.25825	1.17521	0.723095	0.969891
Akr1a4	7707.3	7298.24	8116.35	1.1121	0.153281	0.15051	0.365915
Akr1b10	60.1461	42.8015	77.4907	1.81047	0.856364	0.0537307	0.170434
Akr1b3	0	0	0	NA	NA	NA	NA
Akr1b7	2.52561	1.1975	3.85372	3.21813	1.68622	0.394203	0.701211
Akr1b8	7.52042	7.33341	7.70744	1.051	0.0717685	1	1
Akr1c12	2.34824	2.24513	2.45134	1.09185	0.12677	1	1
Akr1c13	40.4321	30.6803	50.1839	1.63571	0.709914	0.0904161	0.252855
Akr1c14	21.8131	12.8706	30.7556	2.38961	1.25677	0.0278771	0.102892
Akr1c18	0.743954	0	1.48791	Inf	Inf	0.570698	0.866862
Akr1c19	2.53487	3.14289	1.92686	0.613086	-0.705839	0.811497	1
Akr1c20	0	0	0	NA	NA	NA	NA
Akr1c21	0.448878	0.897756	0	0	#NAME?	0.740289	0.978802
Akr1c6	0	0	0	NA	NA	NA	NA
Akr1d1	2.2733	2.09526	2.45134	1.16995	0.226441	1	1
Akr1e1	228.851	210.87	246.832	1.17054	0.227172	0.233736	0.49901
Akr7a5	344.997	312.34	377.653	1.20911	0.273946	0.167349	0.394109
Akt1	3753.56	3486.28	4020.84	1.15333	0.20581	0.0709412	0.210311
Akt1s1	1058.09	1183.95	932.223	0.787385	-0.344859	0.0117408	0.0532672
Akt2	941.358	802.762	1079.95	1.3453	0.427924	0.00195788	0.0128465
Akt3	3429.5	3723.15	3135.84	0.842253	-0.247674	0.0353489	0.123121
Aktip	1105.19	1126	1084.38	0.963032	-0.0543448	0.615307	0.89794
Alad	658.725	614.639	702.812	1.14346	0.1934	0.181691	0.418436
Alas1	347.3	405.566	289.034	0.712668	-0.488698	0.00453566	0.0252109
Alas2	4.28866	5.68703	2.89029	0.508225	-0.97646	0.526205	0.831414
Alb	0.743954	0	1.48791	Inf	Inf	0.570698	0.866862
Alcam	3740.97	3715.36	3766.57	1.01378	0.0197506	0.903727	1
Aldh16a1	190.535	174.947	206.122	1.1782	0.23658	0.289438	0.575692
Aldh18a1	681.627	656.689	706.564	1.07595	0.105609	0.51549	0.822173
Aldh1a1	93.7467	86.3508	101.143	1.1713	0.228109	0.534946	0.839111
Aldh1a2	214.191	157.595	270.787	1.71825	0.780937	0.0112169	0.0514011
Aldh1a3	120.076	90.2445	149.908	1.66113	0.732163	0.0612285	0.188021
Aldh1a7	103.185	136.788	69.5833	0.508696	-0.975125	0.000568302	0.0047135
Aldh1b1	134.487	119.728	149.246	1.24654	0.317933	0.180261	0.416047
Aldh1l1	725.291	512.29	938.292	1.83156	0.873076	0.0483336	0.156882
Aldh1l2	692.769	740.952	644.585	0.869941	-0.20101	0.170304	0.399366
Aldh2	899.923	724.352	1075.49	1.48477	0.570238	2.24418e-05	0.000327051
Aldh3a1	2.49774	2.54414	2.45134	0.963525	-0.0536066	1	1
Aldh3a2	732.432	703.082	761.781	1.08349	0.115684	0.45934	0.767941
Aldh3b1	10.3443	9.5778	11.1109	1.16007	0.214209	0.968802	1
Aldh3b2	2.97383	3.14289	2.80476	0.892416	-0.164212	1	1
Aldh4a1	656.158	718.189	594.127	0.827258	-0.273592	0.140439	0.349359
Aldh5a1	2173.45	2467.53	1879.37	0.761642	-0.392816	0.00128179	0.00912567
Aldh6a1	669.182	528.736	809.628	1.53125	0.614712	3.42321e-05	0.000461851
Aldh7a1	792.696	637.235	948.157	1.48792	0.573302	7.52385e-05	0.000895596
Aldh8a1	41.6932	61.5067	21.8797	0.355728	-1.49115	0.00337659	0.0199383
Aldh9a1	1111.23	1128.71	1093.75	0.96903	-0.0453866	0.733645	0.977071
Aldoa	10838.1	11339.9	10336.3	0.911496	-0.133692	0.261512	0.536937
Aldoart1	4.20979	4.04139	4.3782	1.08334	0.115487	0.950325	1
Aldoart2	2.91481	3.29276	2.53687	0.770437	-0.376251	0.94705	1
Aldob	36.147	35.3189	36.9751	1.04689	0.0661125	0.899428	1
Aldoc	3768.89	3699.4	3838.38	1.03757	0.0532066	0.693443	0.954173
Alg1	319.383	287.936	350.831	1.21843	0.285029	0.133094	0.336152
Alg10b	1426.02	1538.76	1313.28	0.853468	-0.228591	0.0707292	0.209925
Alg11	254.689	304.407	204.97	0.673343	-0.570586	0.0197986	0.078917
Alg12	245.149	287.345	202.953	0.706304	-0.501639	0.0110407	0.0507952
Alg13	228.105	238.549	217.661	0.912436	-0.132205	0.438576	0.747884
Alg14	203.199	181.982	224.416	1.23318	0.302383	0.161011	0.383978
Alg2	8149.93	8919.65	7380.22	0.827411	-0.273324	0.0155786	0.0660317
Alg3	147.178	109.845	184.511	1.67974	0.748241	0.00218477	0.0140133
Alg5	442.165	400.631	483.698	1.20734	0.271832	0.0988428	0.270212
Alg6	289.525	303.206	275.843	0.909753	-0.136453	0.468496	0.777644
Alg8	158.245	127.357	189.134	1.48507	0.570535	0.0142185	0.0617082
Alg9	568.419	570.638	566.199	0.99222	-0.011268	0.977106	1
Alk	643.738	945.368	342.108	0.361878	-1.46642	2.61329e-19	2.3517e-16
Alkbh1	344.751	422.928	266.573	0.630305	-0.665879	0.000112164	0.00125076
Alkbh2	43.9475	47.5907	40.3043	0.846895	-0.239746	0.579723	0.873344
Alkbh3	175.417	165.821	185.013	1.11573	0.157992	0.451915	0.761498
Alkbh4	97.9625	117.779	78.146	0.663497	-0.591838	0.0320115	0.114382
Alkbh5	1577.62	1383.44	1771.79	1.28072	0.356954	0.0885194	0.249011
Alkbh6	341.074	340.617	341.532	1.00269	0.00387169	0.975501	1
Alkbh7	212.045	224.786	199.304	0.886639	-0.173581	0.429684	0.740114
Alkbh8	384.551	466.923	302.18	0.647173	-0.627777	0.000163777	0.00171375
Allc	0.438952	0	0.877903	Inf	Inf	0.785423	1
Alms1	303.537	292.876	314.198	1.0728	0.101385	0.643721	0.921115
Alox12	5.32339	3.29276	7.35402	2.23339	1.15923	0.355231	0.657489
Alox12b	0.219476	0	0.438952	Inf	Inf	1	1
Alox12e	0.443915	0.448878	0.438952	0.977886	-0.0322622	1	1
Alox15	8.91449	11.5239	6.30506	0.547128	-0.87005	0.369304	0.67227
Alox5	1.18721	1.49651	0.877903	0.586635	-0.769466	0.963947	1
Alox5ap	3.1512	2.09526	4.20714	2.00794	1.00571	0.583983	0.875293
Alox8	18.1956	18.8558	17.5354	0.929973	-0.104739	0.919827	1
Aloxe3	91.2228	86.9466	95.4991	1.09836	0.135357	0.79035	1
Alpi	0.935557	1.34663	0.524479	0.389474	-1.3604	0.773567	0.992755
Alpk1	31.7801	26.3399	37.2203	1.41308	0.498843	0.306551	0.5986
Alpk2	3.61468	5.38802	1.84133	0.341746	-1.549	0.398205	0.706168
Alpk3	15.1923	19.6045	10.7801	0.54988	-0.862812	0.21367	0.470198
Alpl	68.5611	42.9513	94.1709	2.1925	1.13258	0.000657396	0.00532245
Alppl2	0.443915	0.448878	0.438952	0.977886	-0.0322622	1	1
Als2	1185.79	1393.74	977.84	0.701594	-0.511292	7.38436e-05	0.000882371
Als2cl	157.517	101.619	213.415	2.10014	1.07049	0.134883	0.339409
Als2cr11	0.711117	0.897756	0.524479	0.58421	-0.77544	0.972299	1
Als2cr12	0.299376	0.598751	0	0	#NAME?	0.983978	1
Als2cr4	443.959	404.368	483.55	1.19582	0.257997	0.131177	0.332245
Alx1	86.9514	66.3004	107.602	1.62295	0.69862	0.17244	0.402957
Alx3	5.68207	2.69327	8.67087	3.21946	1.68682	0.230807	0.494599
Alx4	9.6618	6.88453	12.4391	1.80681	0.853448	0.326306	0.622783
Amac1	4.18163	6.43639	1.92686	0.29937	-1.74	0.543352	0.846248
Amacr	94.2605	93.3867	95.1343	1.01871	0.0267492	0.923408	1
Ambn	0.443915	0.448878	0.438952	0.977886	-0.0322622	1	1
Ambp	0.968393	0.448878	1.48791	3.31473	1.72889	0.832425	1
Ambra1	1567.36	2008.08	1126.64	0.561051	-0.833796	2.94589e-11	3.58244e-09
Amd1	0	0	0	NA	NA	NA	NA
Amd2	0	0	0	NA	NA	NA	NA
Amdhd1	0.262239	0	0.524479	Inf	Inf	1	1
Amdhd2	151.186	142.174	160.197	1.12677	0.172191	0.49023	0.798661
Amelx	0.448878	0.897756	0	0	#NAME?	0.740289	0.978802
Amfr	4055.75	3946.74	4164.76	1.05524	0.0775697	0.537765	0.84126
Amh	13.039	14.5169	11.5612	0.796391	-0.328451	0.702336	0.961203
Amhr2	30.8989	30.9793	30.8184	0.994809	-0.00750873	0.986095	1
[truncated: 19,938 more rows]
