# Supplementary material for: Dynamics and function of distal regulatory elements during neurogenesis and neuroplasticity
Source: HighWire-hosted journal article supplement (doi:10.1101/gr.190926.115), 2015-07-13
Supplement: Supplemental_Table_S8.xlsx [file Supplemental_Table_S8.xlsx]

## Sheet: ChIP primers
	Name of nearest gene of Peak		Sequences
Fig1J	AU021092 FAIRE peak	FP	CCCATATCCAGAACTGGCCTGAC
		RP	TTACCCAGGAAGGCTTGGAGACA
	Cyp11a1 FAIRE peak	FP	CTCTGAGTTTGGGAGGGGCTGT
		RP	AGAGAAGCTGATGGAGCGGTGAC
	Dppa4 FAIRE peak	FP	CCTACTTGCCAGAAGAGGGCATC
		RP	GGGGTTCAATCGCACTAACTGCT
	Serpine1 FAIRE peak	FP	GTGAGAGATGGAGACGGGACGTT
		RP	ACAGCCAACAAGAGCCAATCACA
	Dbx1 FAIRE peak	FP	TCTGCGAGTCTTCTGTGGCTCTC
		RP	AGCCCGAGTGGAGAACTTTGTTG
	Mapt FAIRE peak	FP	AGGTGGAAAGAAAGCAAGCGAAC
		RP	CTACAGGCTCCCCGAGTCTCCTA
	Elavl3 FAIRE peak	FP	TCTTTTGGCACGCAGAGTCTAGG
		RP	ATTGGCTGAGACGGTGGGTCT
	Cadm4 FAIRE peak	FP	CAGTCTTTCCCTGCCCACATTC
		RP	CGTGTGCTGTGAGTGTGAGCTTT
	Eif4g2 FAIRE peak	FP	CACTAGAGCCTCCCCGAGTGG
		RP	GAGCCTTCGCGAATATGGCTTT
	H3f3b FAIRE peak	FP	ACCCTGATTTGCATACACCAACG
		RP	TTCGTCTGTTCCTCTTTGCATCC
	Ddx39b FAIRE peak	FP	TCCTGCCTATTCTCTGCACGACT
		RP	CTCTCTGTGGGCATGGAGGACT
	P4ha1 FAIRE peak	FP	TTGCACAACTGTCCTTCCTGATG
		RP	GCCCGGGTTCCTGTAGGATTTAG
	Rcn1 FAIRE peak	FP	GTTGCGGACTGGAGGGTTCTCT
		RP	AGACGAGCTATCACCCCAAAACA
	Ptpn5 FAIRE peak	FP	ACCACCTCACTGGCCTCAGTTTC
		RP	AGGCTCCTACAAAGCTTGGGTCA
Fig 3M	Sox2 distal peak 1	FP	CACAGCCATCCTTTTGTCAGTCAC
		RP	TCAGTTTTCTTCCCCCATCCTGTA
	Sox2 distal peak 2	FP	CCCACCAGTGTACAGACCAACAAA
		RP	TCTCAGATTCCTTGAGAGCCTGGT
	Sox2 distal peak 3	FP	GTGTCTGGGAGGATTTCCACTTGT
		RP	GGGGAATGAGCAGGAGACAAAG
Fig 3N	Isl1 distal peak 1	FP	GGAGGGACTGGGAACCAGATG
		RP	ACACCCTTCAGGCAGACACTATGA
	Isl1 distal peak 2	FP	ATGGAATGAGTGACCTCAGACAGG
		RP	TTAGAGGATGCCACCAGTGCTTCT
	Isl1 distal peak 3	FP	GGTCCCAGCTGCACTCAACTAATTT
		RP	TCCTGTAGGGAAGATGCAGTGATT
Fig 3O	Ctcf distal peak 1	FP	GGTCCCGGTGTTTTCTGCTAACTA
		RP	CTCCAGTGAAATGGCTGAACAAAA
	Ctcf distal peak 2	FP	TTGTCTGCCTGGATAAAGCCTCTC
		RP	AGCAGGCTTTGGCCTAGTTTTCTC
	Ctcf distal peak 3	FP	CGAATCTTACTTTGGCAAGGCAGT
		RP	CTTAGCCACTAGAGGGCAGCAGAG
Fig6K	Distal H3K27ac Peak1	FP	GTGCTTAGGCAAGACCCTAGGACA
		RP	GGTTTTAAAGGCTTGCACCACAAC
	Distal H3K27ac Peak2	FP	AACAACCCCAAGCCTTCCCTATTA
		RP	CCTTCCTTCCTTCCTTCCTTCCTT
	Distal H3K27ac Peak3	FP	ATTCCCCTTCTCTTGTCTCCGTTC
		RP	TCCATTAGTGTTGATCGGCTGTGT
	Distal H3K27ac Peak4	FP	GAGAGGTCACCCTGTTGAGCAGAT
		RP	TCCAGAGGCCTTATTTCATTTTCG
	Distal H3K27ac Peak5	FP	GGACAAAAACATCGAGAAAGCAAA
		RP	CACCAAAAATCTCTCGGTCATGTG
	Distal H3K27ac Peak6	FP	GCAGCCAGTACCAAGCCATCTATC
		RP	AAGCCATATCAGCTGCACTCACAC
	Distal H3K27ac Peak7	FP	CCCTAAGAGCCTGGGGTTCCTAAT
		RP	AACAACAGACAACAGACAGCAGCA
	Distal H3K27ac Peak8	FP	TCATACGTGTGATAATCAGTGGGAGA
		RP	CACTGCTCAAGTTATTTCTCGGACA
	Distal H3K27ac Peak9	FP	GCAGCCAGTACCAAGCCATCTATC
		RP	AAGCCATATCAGCTGCACTCACAC
	Distal H3K27ac Peak10	FP	AGAGACTCTTGGGGGAACACAGTC
		RP	CCTGGTTAATGTCGTGGCTATGTG
	Distal H3K27ac Peak11	FP	GAGCCCTAGACACCCATTACAGGA
		RP	GCACTCTTAGCATGTCTTTGGAGGA
	Distal H3K27ac Peak12	FP	TGAATGCAAACTGAACAGATGGAAA
		RP	TTCCATGATCATCAAACGGGAGTA
Fig7I, J	Col3a1 distal peak	FP	AACAACCCCAAGCCTTCCCTATT
		RP	TCCTTCCTTCCTTCCTTCCTTCC
	Lama4 distal peak	FP	CAATGGAAACCTGTGCTGTAGCC
		RP	ACCACACTGCTCCATGTGTCTGA
	Bhlha9 distal peak	FP	CCCTAACTCTTGCTGGGTGGAG
		RP	CGGTGGTTAGCAGAAGCTGAGAA
	Odz2 distal peak	FP	TCCCCATCTCTTCCTCTGTCCTC
		RP	GTGTTAATGCAGGGCACTTCCTG
Fig7L, M	Gstt3 distal peak	FP	GTGCTTAGGCAAGACCCTAGGACA
		RP	GGTTTTAAAGGCTTGCACCACAAC
	Lama4 distal peak	FP	GCCTACAATGGAAACCTGTGCTGT
		RP	GTCCTGTTCTCTGCACTGTGGTGT
	Col3a1 distal peak	FP	AACAACCCCAAGCCTTCCCTATTA
		RP	CCTTCCTTCCTTCCTTCCTTCCTT
	Col1a2 distal peak	FP	ATTCCCCTTCTCTTGTCTCCGTTC
		RP	TCCATTAGTGTTGATCGGCTGTGT
	Col1a1 distal peak	FP	GAGAGGTCACCCTGTTGAGCAGAT
		RP	TCCAGAGGCCTTATTTCATTTTCG
	Lrig3 distal peak	FP	GGACAAAAACATCGAGAAAGCAAA
		RP	CACCAAAAATCTCTCGGTCATGTG
	Creb3l1 distal peak	FP	GCAGCCAGTACCAAGCCATCTATC
		RP	AAGCCATATCAGCTGCACTCACAC
	Lgals1 distal peak	FP	CCCTAAGAGCCTGGGGTTCCTAAT
		RP	AACAACAGACAACAGACAGCAGCA

## Sheet: RT Primers
Name		Sequences
Tbp	FP	GTTTCTGCGGTCGCGTCATTT
	RP	TGGGTTATCTTCACACACCATGAA
zfp36l1	FP	CGACACACCAGATCCTAGTCCTTG
	RP	GGGAGTGCTGTAGTTGAGCATCTT
Tnfrsf12a	FP	GATTCGGCTTGGTGTTGATGC
	RP	CAGTCCATGCACTTGTCGAGGT
Thbs1	FP	CCCCAACCTTCCCAACTCG
	RP	GCTGGGTTGTAATGGAATGGACA
Tgif1	FP	CCTAGAAACCCCAGCTTCACCTC
	RP	ACTGCCAGATGCTGCAACAAGAC
Mafk	FP	CACATGCTGACCACGCAGAGAC
	RP	AAATATTGAAATGAAATTGCCAAGTG
Ctgf	FP	TGCACACCGCACAGAACCAC
	RP	TCTTTTTCATGATCTCGCCATCG
Cyr61	FP	GGATCTGTGAAGTGCGTCCTTGT
	RP	TGCTGCATTTCTTGCCCTTTTT
Csfl	FP	CCGCCCCTGTGTGCATTAG
	RP	GCAGTGCTCCCTCTGAGCTTTC
Adamts1	FP	TGGCAGATGTTGGAACCGTATGT
	RP	ATCGTGCGGCATGTTAAACACA
Cflar	FP	CCTCAGGGTTTAGGGACCTGTTC
	RP	CACCACCTCTGGCTCTCACAGTC
Aff1	FP	CAGGCACCTTCTCCATGCAC
	RP	GCTGCCAGCACTTGATTGG
Sox2	FP	CCATGGGCTCTGTGGTCAAGT
	RP	GGAGTGGGAGGAAGAGGTAACCA
Sox8	FP	CAAGACCCTAGGCAAGCTGTGG
	RP	TCTGGGTGGTCTTTCTTGTGCTG
Notch1	FP	GAGCTGGACCCCATGGACATC
	RP	ACTGCACACATTGCCGGTTGT
Notch3	FP	GTGAGCTGGGTCCTGAGGTGAT
	RP	AGACAGAGCCGGTTGTCAATCTC
Insm1	FP	CTAGAAAATGCGGTTTGCTCTGC
	RP	CAAAACAACCCGTACGCTACAGA
Dlk1	FP	GGACGGGAAATTCTGCGAAATAG
	RP	TGTGCAGGAGCATTCGTACTGG
Dll1	FP	GGCTTCTCTGGCTTCAACTGTGA
	RP	AAGAGTTGCCGAGGTCCACACAC
Nfib	FP	ACTTTCCCCCAGCACCATCAT
	RP	GGAGGTGGAGTTCGAGTTGAGATG
Egr4	FP	TTCTCTCCAAGCCCACCGAAG
	RP	CTCAAAGCCCAGCTCAAGAAGTC
Npas4	FP	AGGGTTTGCTGATGAGTTGCAT
	RP	GGTTCCCCTCCACTTCCATCTT
Ctcf	FP	CACACACACAGGTACTCGTCCTCA
	RP	CCACTGGTCACAAAGGCCATATC
Fosb	FP	GGAGGGAGCTGACAGATCGACTT
	RP	AGGCGTTCCTTCTCTTTTTGCAG
Fos	FP	ACTACCATTCCCCAGCCGACTC
	RP	GACAGATCTGCGCAAAAGTCCTG
Esrrb	FP	GCTTCTTCCTGGACCCCTTACCT
	RP	GTGTGCAGCTCTCCTGGTTTGAG
Col3a1	FP	AAATGGTCTTCCAGGAGACAACG
	RP	CCATCATTGCCTCGAGCACCT
Lama4	FP	CCTCTACCTCGGAAGCAAAAACG
	RP	CAGGAGCTCACAGGCTTGGAA
Bhlha9	FP	AGGGCATATGCTGTGGTCCTCTT
	RP	TGATCATTTTCTGGGCTTCTCTCA
Odz2	FP	CCTCAAAGCCGTGTCCACTCAG
	RP	GACGGCCCTCGTGGTCATAG
